# Supplementary material for: Short- and long-range interactions in the HIV-1 5’UTR regulate genome dimerization and packaging
Source: Research Square preprint supplement (doi:10.21203/rs.3.rs-613603/v1), 2021-12-10

## Conservation

The conservation of these polyA-SL1 and PBS-SL1 interactions were assessed using approximately 800 curated sequences downloaded from the Los Alamos HIV sequence database.

### 1. polyA-SL1 interaction

#### polyA sequence conservation, modal sequence

| Modal Sequence: 5' |     |     |     |     |      |     |     |     |     |      |      |     |     |     |     |     |     |     |
|--------------------|-----|-----|-----|-----|------|-----|-----|-----|-----|------|------|-----|-----|-----|-----|-----|-----|-----|
| position           | 80  | 81  | 82  | 83  | 84   | 85  | 86  | 87  | 88  | 89   | 90   | 91  | 92  | 93  | 94  | 95  | 96  | 97  |
| base               | C   | T   | T   | G   | C    | C   | T   | T   | G   | A    | G    | T   | G   | C   | T   | T   | C   | A   |
| a                  | 1   | 1   | 1   | 0   | 0    | 0   | 0   | 0   | 9   | 887  | 0    | 0   | 6   | 0   | 7   | 20  | 76  | 867 |
| u                  | 0   | 890 | 889 | 1   | 0    | 5   | 877 | 885 | 0   | 0    | 0    | 884 | 0   | 3   | 860 | 804 | 308 | 0   |
| c                  | 890 | 0   | 0   | 0   | 887  | 883 | 6   | 1   | 1   | 0    | 0    | 0   | 0   | 884 | 1   | 46  | 485 | 1   |
| g                  | 0   | 0   | 1   | 889 | 0    | 0   | 0   | 1   | 877 | 0    | 889  | 3   | 881 | 0   | 3   | 1   | 2   | 0   |
| count              | 890 | 890 | 889 | 889 | 887  | 883 | 877 | 885 | 877 | 887  | 889  | 884 | 881 | 884 | 860 | 804 | 485 | 867 |
| total              | 891 | 891 | 891 | 890 | 887  | 888 | 883 | 887 | 887 | 887  | 889  | 887 | 887 | 887 | 871 | 871 | 871 | 868 |
| modal conservation | 99% | 99% | 99% | 99% | 100% | 99% | 99% | 99% | 98% | 100% | 100% | 99% | 99% | 99% | 98% | 92% | 55% | 99% |

#### SL1 sequence conservation, modal sequence

| Modal Sequence: 3' |      |     |     |      |     |     |      |     |     |      |     |     |     |     |      |      |      |     |
|--------------------|------|-----|-----|------|-----|-----|------|-----|-----|------|-----|-----|-----|-----|------|------|------|-----|
| position           | 253  | 254 | 255 | 256  | 257 | 258 | 259  | 260 | 261 | 262  | 263 | 264 | 265 | 266 | 267  | 268  | 269  | 270 |
| base               | T    | G   | A   | A    | G   | C   | G    | C   | G   | C    | A   | C   | G   | G   | C    | A    | A    | G   |
| a                  | 0    | 2   | 651 | 687  | 9   | 0   | 0    | 0   | 5   | 0    | 653 | 0   | 170 | 5   | 0    | 685  | 685  | 3   |
| u                  | 688  | 0   | 2   | 0    | 1   | 15  | 0    | 2   | 0   | 0    | 6   | 4   | 0   | 0   | 0    | 0    | 0    | 0   |
| c                  | 0    | 0   | 1   | 0    | 7   | 667 | 0    | 685 | 0   | 684  | 1   | 681 | 4   | 3   | 685  | 0    | 0    | 0   |
| g                  | 0    | 684 | 0   | 0    | 664 | 0   | 687  | 0   | 681 | 0    | 24  | 0   | 511 | 677 | 0    | 0    | 0    | 682 |
| count              | 688  | 684 | 651 | 687  | 664 | 667 | 687  | 685 | 681 | 684  | 653 | 681 | 511 | 677 | 685  | 685  | 685  | 682 |
| total              | 688  | 686 | 654 | 687  | 681 | 682 | 687  | 687 | 686 | 684  | 684 | 685 | 685 | 685 | 685  | 685  | 685  | 685 |
| modal conservation | 100% | 99% | 99% | 100% | 97% | 97% | 100% | 99% | 99% | 100% | 95% | 99% | 74% | 98% | 100% | 100% | 100% | 99% |

#### SL1-polyA interaction conservation

| Conservation of Interaction |     |     |     |     |     |     |     |     |     |     |      |     |     |     |     |     |     |      |
|-----------------------------|-----|-----|-----|-----|-----|-----|-----|-----|-----|-----|------|-----|-----|-----|-----|-----|-----|------|
| position1                   | 80  | 81  | 82  | 83  | 84  | 85  | 86  | 87  | 88  | 89  | 90   | 91  | 92  | 93  | 94  | 95  | 96  | 97   |
| base1                       | C   | T   | T   | G   | C   | C   | T   | T   | G   | A   | G    | T   | G   | C   | T   | T   | C   | A    |
| interaction                 |     |     |     |     |     |     | -   |     |     | -   |      |     |     |     |     |     |     |      |
| base2                       | G   | A   | A   | C   | G   | G   | C   | A   | C   | G   | C    | G   | C   | G   | A   | A   | G   | T    |
| position2                   | 270 | 269 | 268 | 267 | 266 | 265 | 264 | 263 | 262 | 261 | 260  | 259 | 258 | 257 | 256 | 255 | 254 | 253  |
| interacting                 | 679 | 682 | 681 | 681 | 674 | 515 | 0   | 672 | 671 | 0   | 686  | 684 | 678 | 662 | 679 | 590 | 617 | 687  |
| not interacting             | 4   | 1   | 2   | 1   | 8   | 168 | 679 | 9   | 10  | 684 | 0    | 1   | 2   | 17  | 7   | 63  | 68  | 0    |
| conservation                | 99% | 99% | 99% | 99% | 98% | 75% | 0%  | 98% | 98% | 0%  | 100% | 99% | 99% | 97% | 98% | 90% | 90% | 100% |

These regions are highly conserved, with some polymorphism at positions 95/96 in the polyA. The modal sequence from this alignment differs slightly from the NL43 construct used in our study. Nevertheless, the polymorphisms maintain the polyA-SL1 interaction (and even extend it).

There is one polymorphic position 265 in SL1. The G to A mutation does not conserve the interaction with its partner directly opposite, but this mutation is not disruptive as it can instead base pair with the unpaired U86 opposite.

## 2. PBS-SL1 interaction

### PBS sequence conservation, modal sequence

| Modal Sequence: 5' |     |      |     |     |     |     |     |     |      |      |     |     |     |      |     |
|--------------------|-----|------|-----|-----|-----|-----|-----|-----|------|------|-----|-----|-----|------|-----|
| position           | 210 | 211  | 212 | 213 | 214 | 215 | 216 | 217 | 218  | 219  | 220 | 221 | 222 | 223  | 224 |
| base               | A   | A    | G   | T   | A   | A   | A   | A   | C    | C    | A   | G   | A   | G    | G   |
| a                  | 685 | 687  | 4   | 115 | 478 | 344 | 638 | 638 | 0    | 0    | 552 | 4   | 682 | 0    | 136 |
| u                  | 0   | 0    | 0   | 451 | 5   | 4   | 13  | 3   | 0    | 0    | 0   | 1   | 0   | 0    | 5   |
| c                  | 2   | 0    | 0   | 7   | 0   | 0   | 0   | 0   | 686  | 687  | 1   | 0   | 0   | 0    | 3   |
| g                  | 0   | 0    | 681 | 113 | 204 | 338 | 35  | 46  | 0    | 0    | 133 | 679 | 2   | 685  | 543 |
| count              | 685 | 687  | 681 | 451 | 478 | 344 | 638 | 638 | 686  | 687  | 552 | 679 | 682 | 685  | 543 |
| total              | 687 | 687  | 685 | 686 | 687 | 686 | 686 | 687 | 686  | 687  | 686 | 684 | 684 | 685  | 687 |
| modal conservation | 99% | 100% | 99% | 65% | 69% | 50% | 93% | 92% | 100% | 100% | 80% | 99% | 99% | 100% | 79% |

### SL1 sequence conservation, modal sequence

| Modal Sequence: 3' |     |     |     |      |     |     |     |      |      |      |      |     |      |     |     |
|--------------------|-----|-----|-----|------|-----|-----|-----|------|------|------|------|-----|------|-----|-----|
| position           | 241 | 242 | 243 | 244  | 245 | 246 | 247 | 248  | 249  | 250  | 251  | 252 | 253  | 254 | 255 |
| base               | G   | A   | C   | T    | C   | G   | G   | C    | T    | T    | G    | C   | T    | G   | A   |
| a                  | 2   | 685 | 0   | 0    | 1   | 0   | 0   | 0    | 0    | 0    | 0    | 0   | 0    | 2   | 651 |
| u                  | 0   | 0   | 1   | 688  | 4   | 2   | 2   | 0    | 688  | 688  | 0    | 2   | 688  | 0   | 2   |
| c                  | 0   | 0   | 687 | 0    | 682 | 0   | 0   | 688  | 0    | 0    | 0    | 682 | 0    | 0   | 1   |
| g                  | 686 | 3   | 0   | 0    | 1   | 686 | 686 | 0    | 0    | 0    | 688  | 3   | 0    | 684 | 0   |
| count              | 686 | 685 | 687 | 688  | 682 | 686 | 686 | 688  | 688  | 688  | 688  | 682 | 688  | 684 | 651 |
| total              | 688 | 688 | 688 | 688  | 688 | 688 | 688 | 688  | 688  | 688  | 688  | 687 | 688  | 686 | 654 |
| modal conservation | 99% | 99% | 99% | 100% | 99% | 99% | 99% | 100% | 100% | 100% | 100% | 99% | 100% | 99% | 99% |

The SL1 sequence is almost universally conserved. We identified sequence variants in the PBS region, resulting in some structural variation, but all are predicted to form hairpins of similar stability. The figure below shows the predicted structure of the top 116, 71, 50 sequence variants.

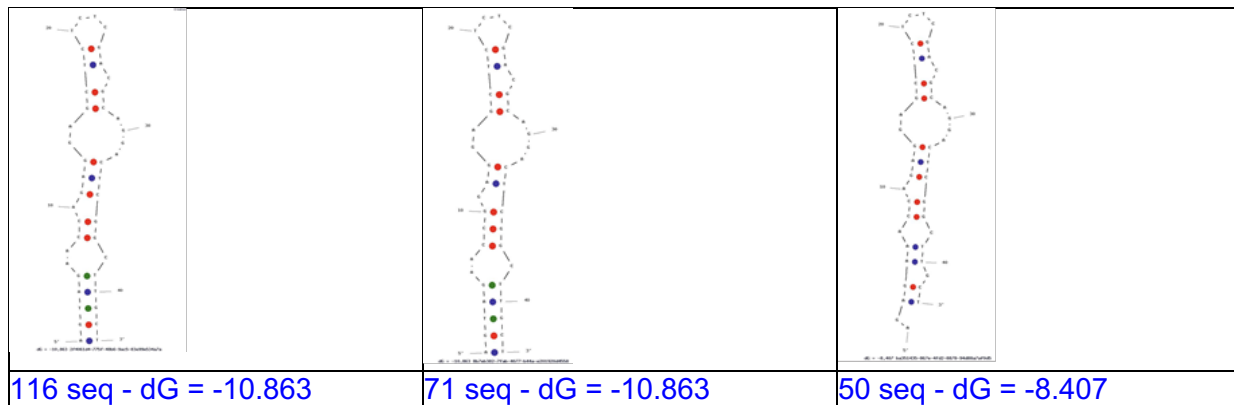

Supplement: Supplementary file 31 [file Conservation.pdf › Conservation/Conservation.pdf]
