# Supplementary figures and images for: Short- and long-range interactions in the HIV-1 5’UTR regulate genome dimerization and packaging
Source: Research Square preprint supplement (doi:10.21203/rs.3.rs-613603/v1), 2021-12-10

$\Delta$ SHAPE

1.00  
0.75  
0.50  
0.25  
0.00  
-0.25  
-0.50  
-0.75

Nucleotide

50

100

150

200

250

300

350

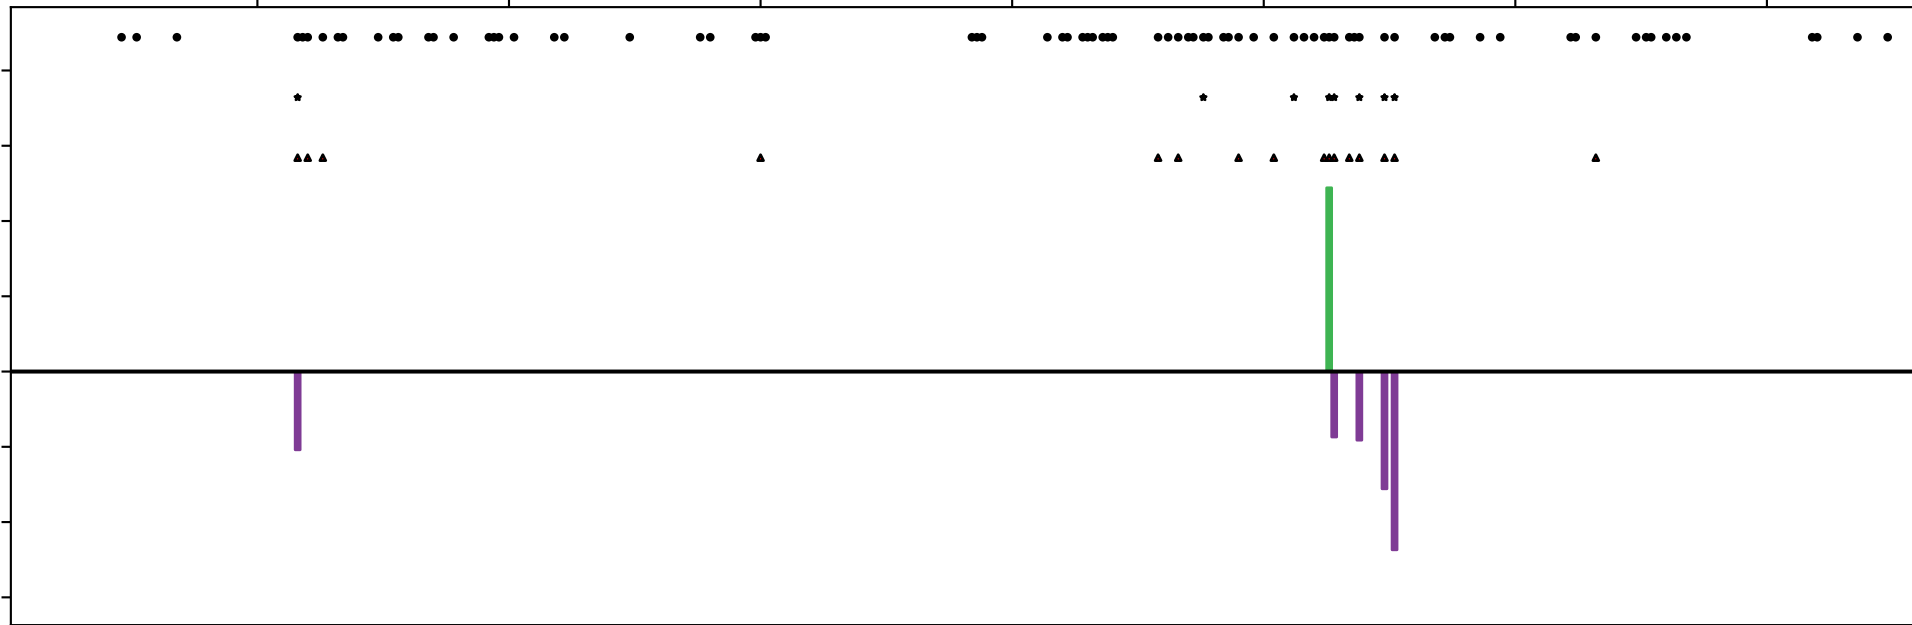

Supplement: Supplementary file 1 [file oneGtwoG_dimer_vs_oneGtwoG_monomer.pdf › deltaSHAPE/oneGtwoG_dimer_vs_oneGtwoG_monomer.pdf]

$\Delta$ SHAPE

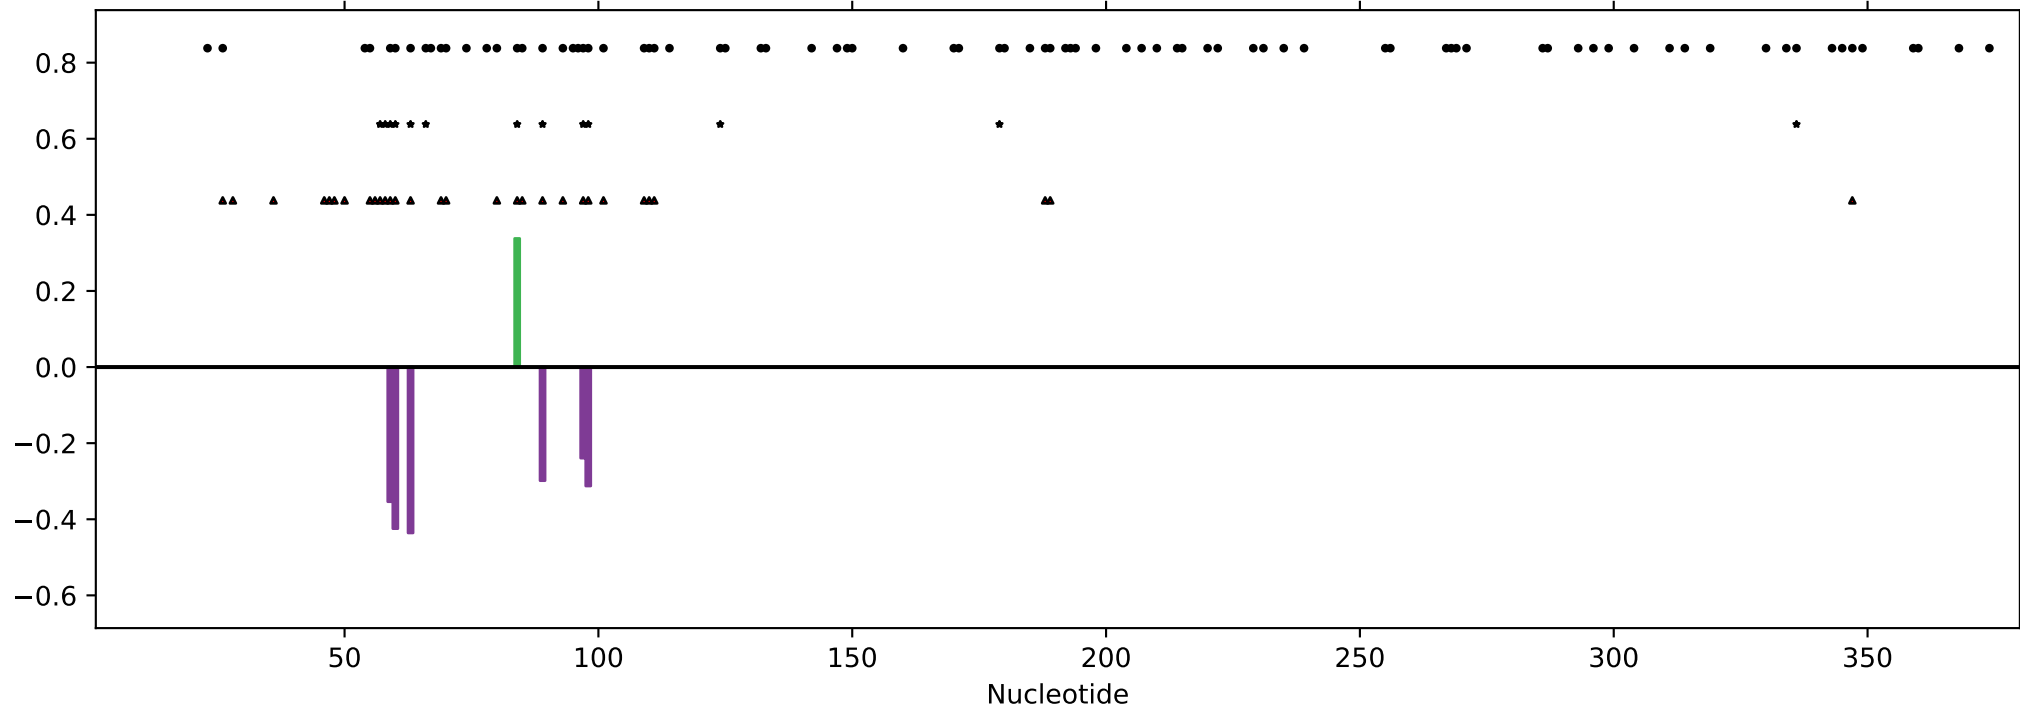

Supplement: Supplementary file 2 [file oneGtwoG_dimer_vs_threeG_dimer.pdf › deltaSHAPE/oneGtwoG_dimer_vs_threeG_dimer.pdf]

$\Delta$ SHAPE

1.00  
0.75  
0.50  
0.25  
0.00  
-0.25  
-0.50  
-0.75

Nucleotide

50

100

150

200

250

300

350

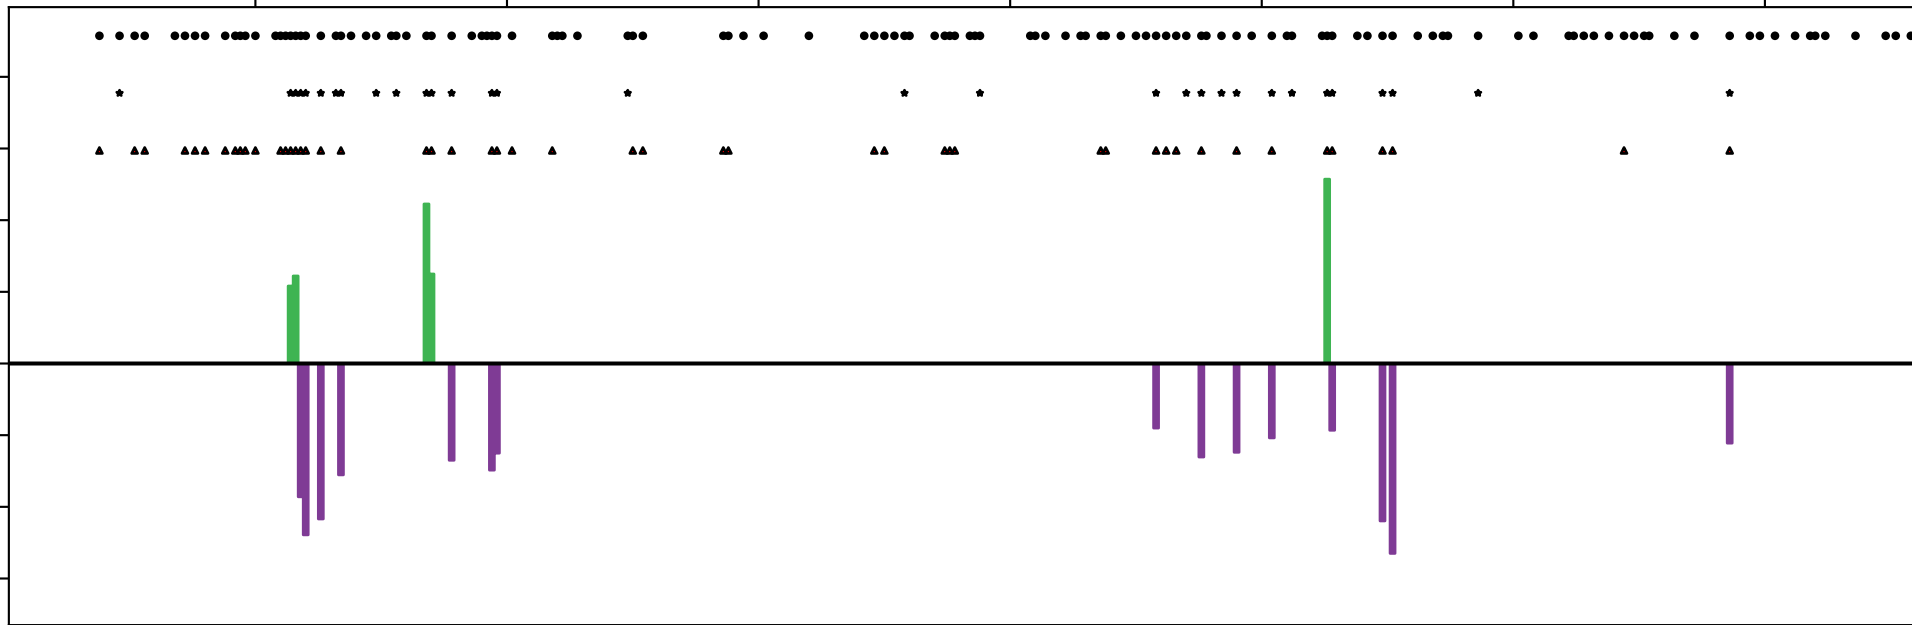

Supplement: Supplementary file 3 [file oneGtwoG_dimer_vs_threeG_monomer.pdf › deltaSHAPE/oneGtwoG_dimer_vs_threeG_monomer.pdf]

$\Delta$ SHAPE

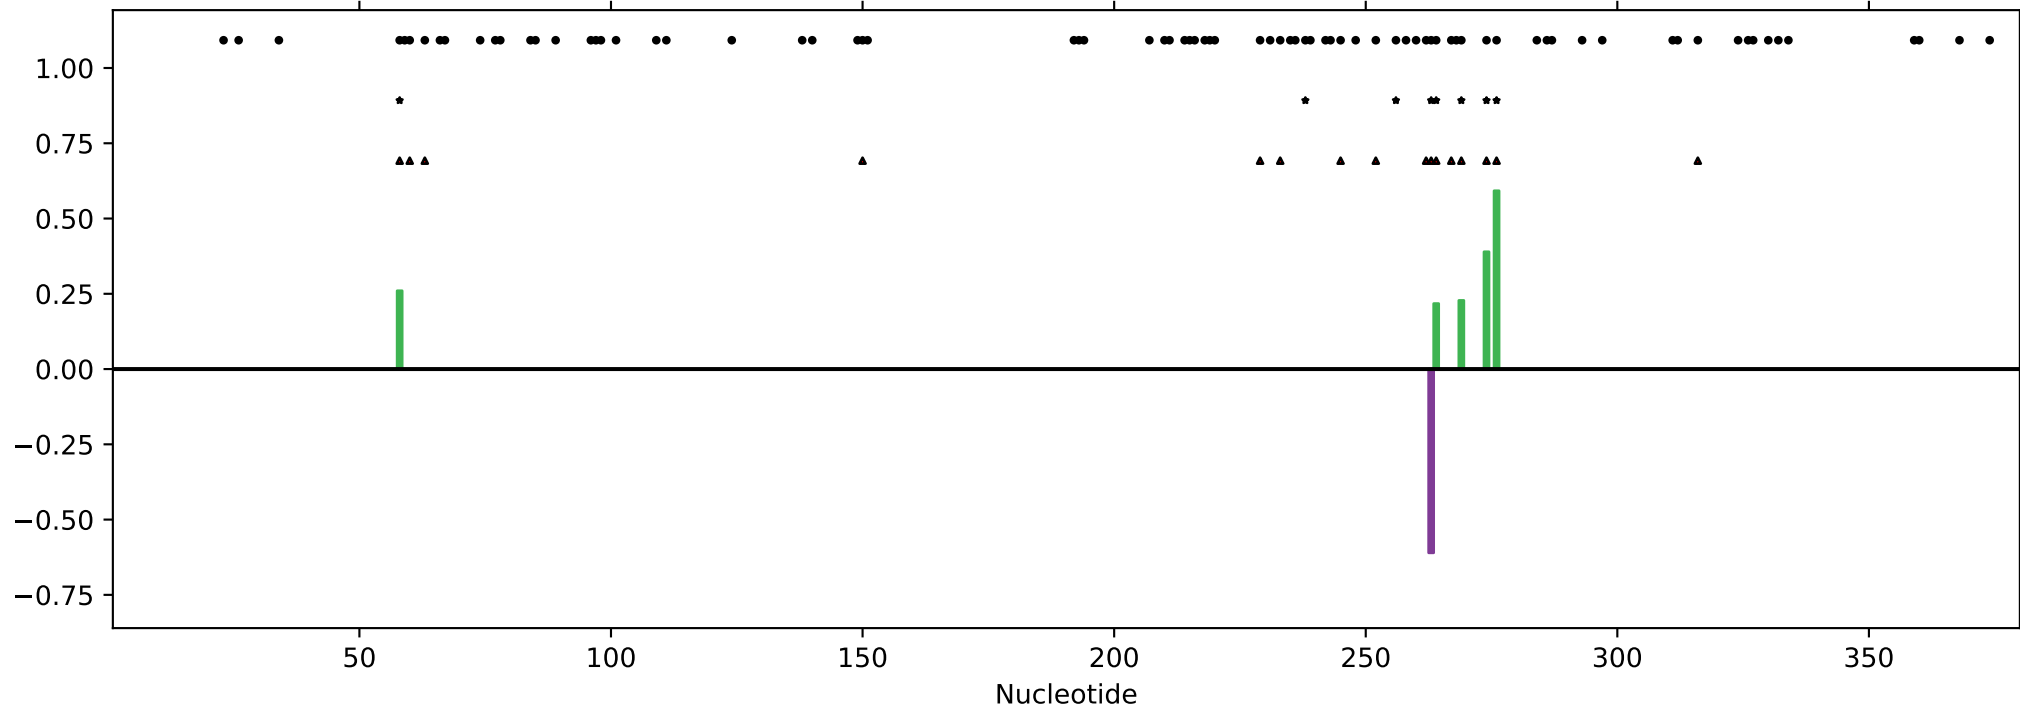

Supplement: Supplementary file 4 [file oneGtwoG_monomer_vs_oneGtwoG_dimer.pdf › deltaSHAPE/oneGtwoG_monomer_vs_oneGtwoG_dimer.pdf]

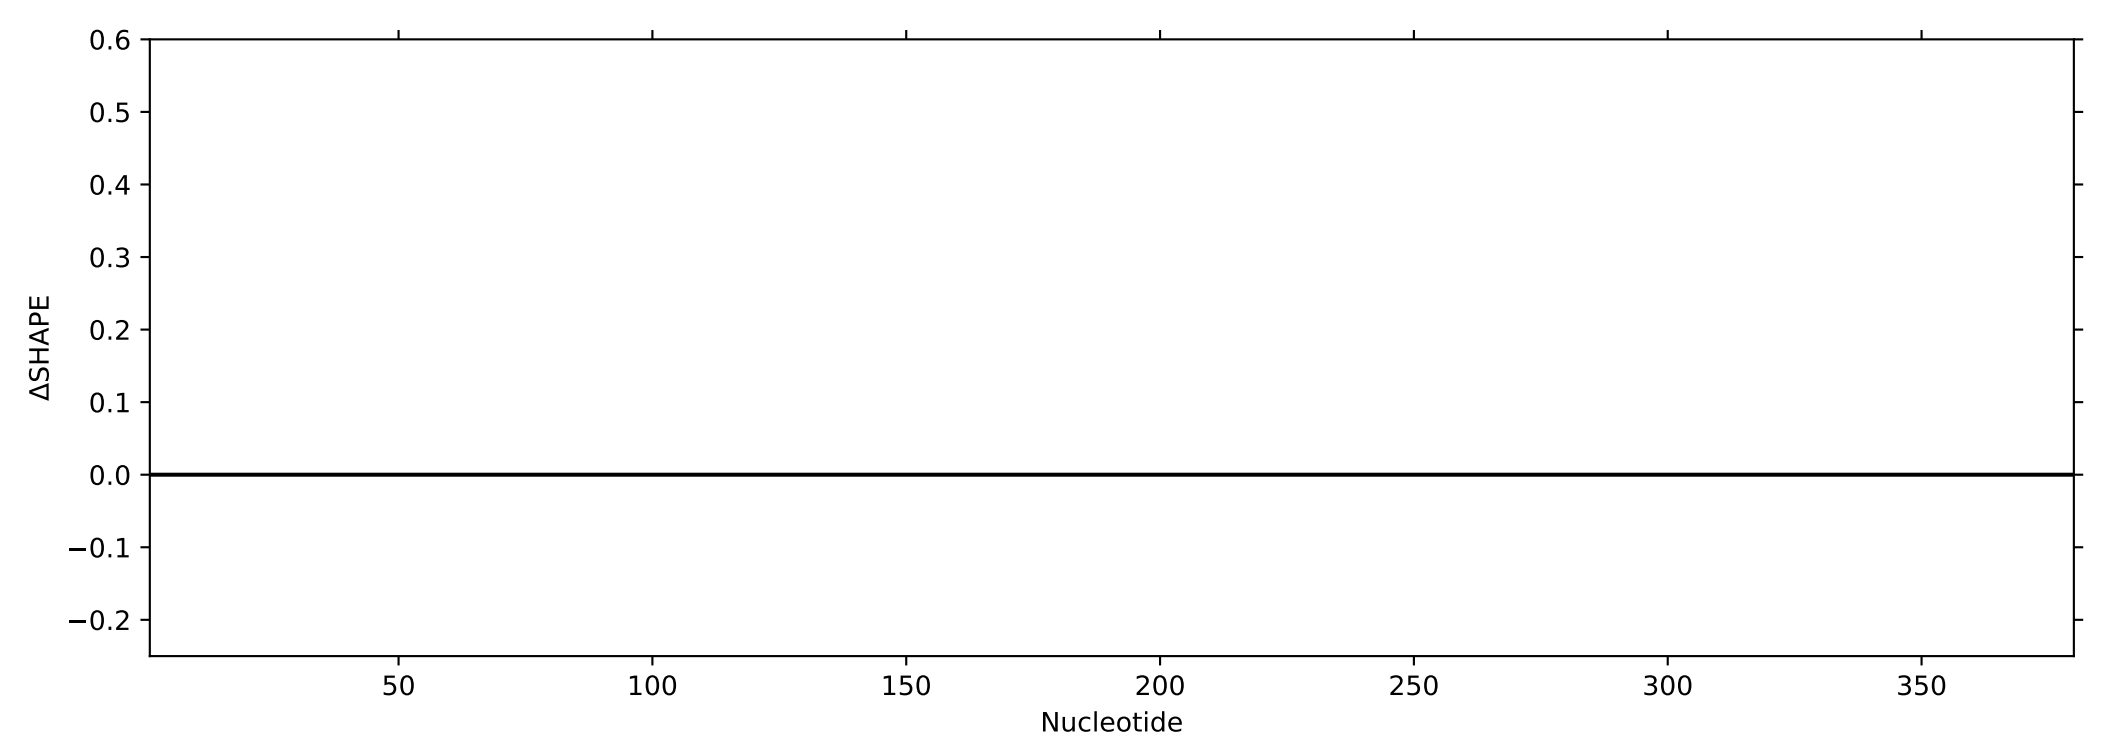

Supplement: Supplementary file 5 [file oneGtwoG_monomer_vs_oneGtwoG_monomer.pdf › deltaSHAPE/oneGtwoG_monomer_vs_oneGtwoG_monomer.pdf]

$\Delta$ SHAPE

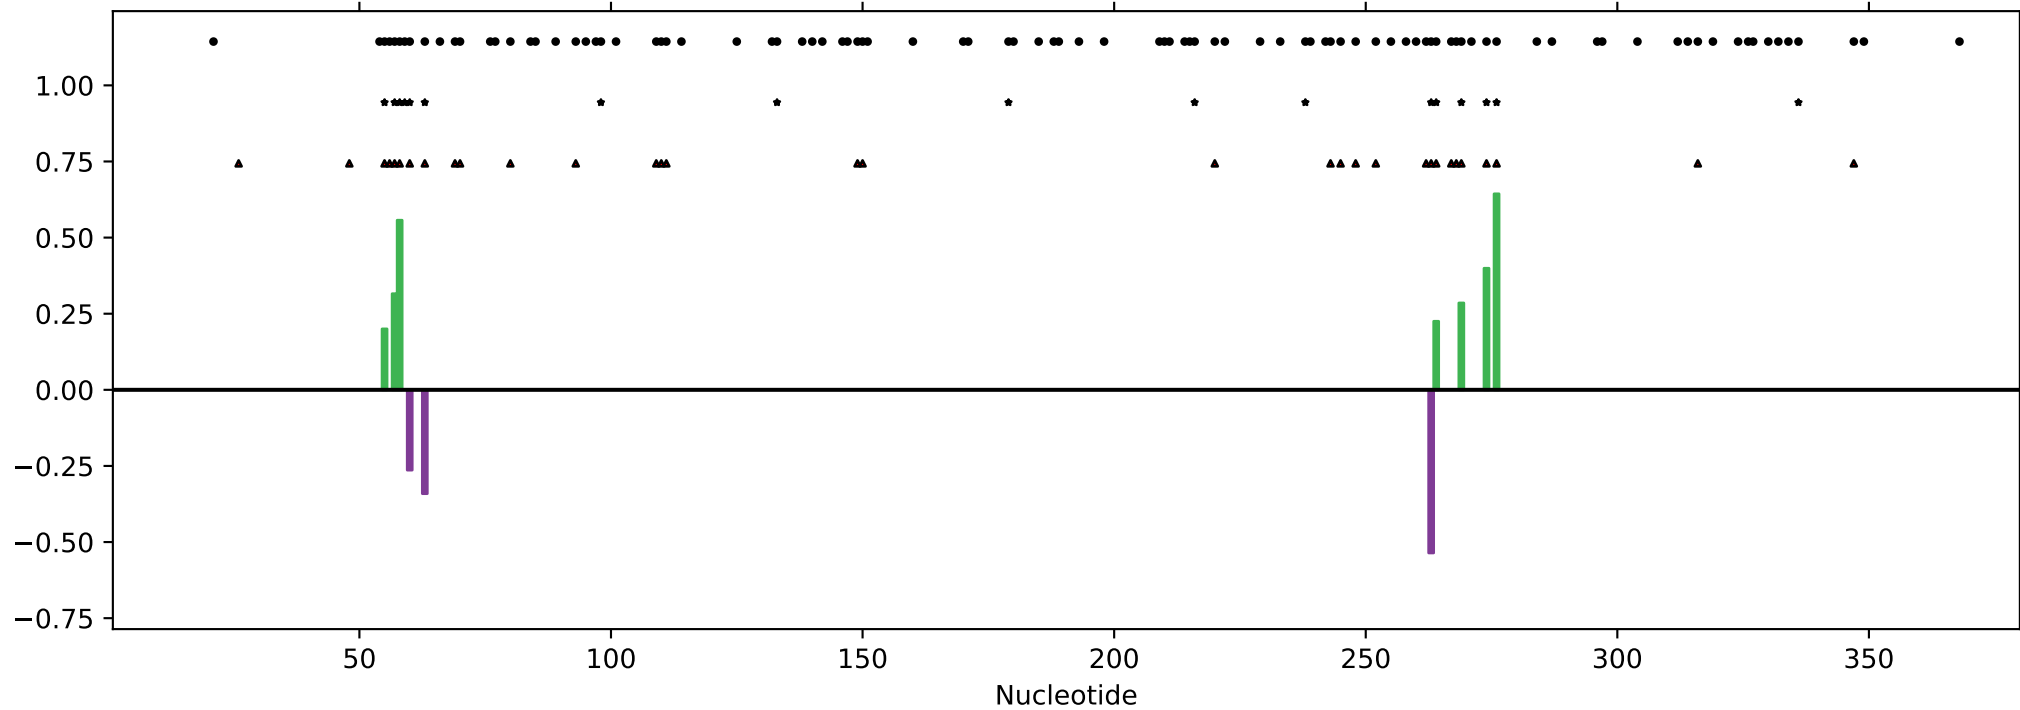

Supplement: Supplementary file 6 [file oneGtwoG_monomer_vs_threeG_dimer.pdf › deltaSHAPE/oneGtwoG_monomer_vs_threeG_dimer.pdf]

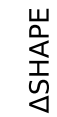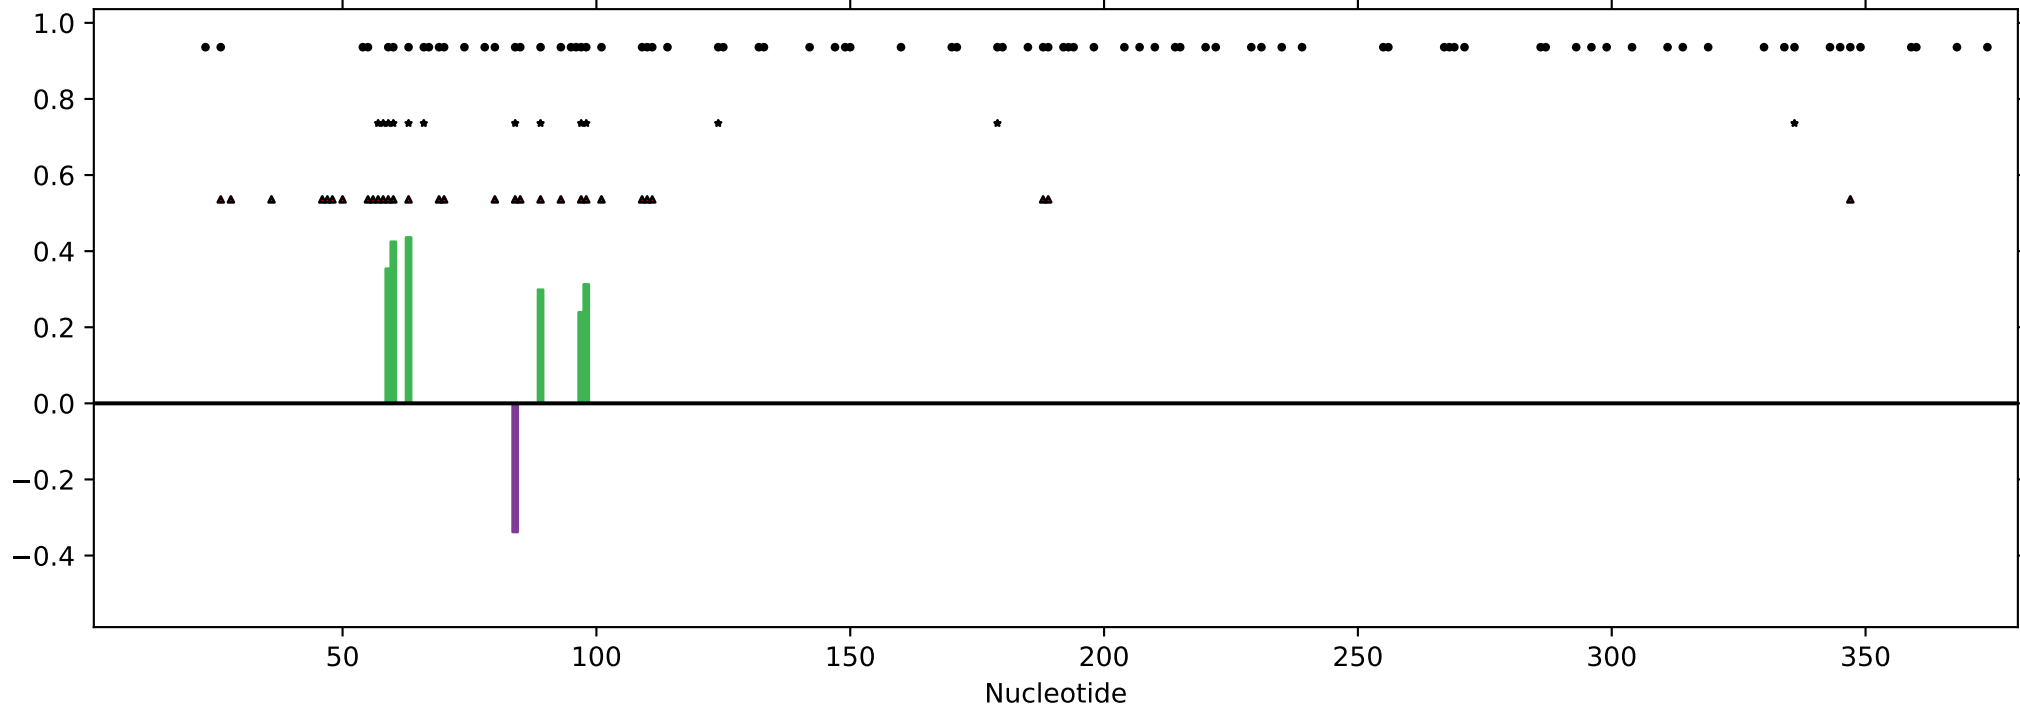

Supplement: Supplementary file 7 [file threeG_dimer_vs_oneGtwoG_dimer.pdf › deltaSHAPE/threeG_dimer_vs_oneGtwoG_dimer.pdf]

$\Delta$ SHAPE

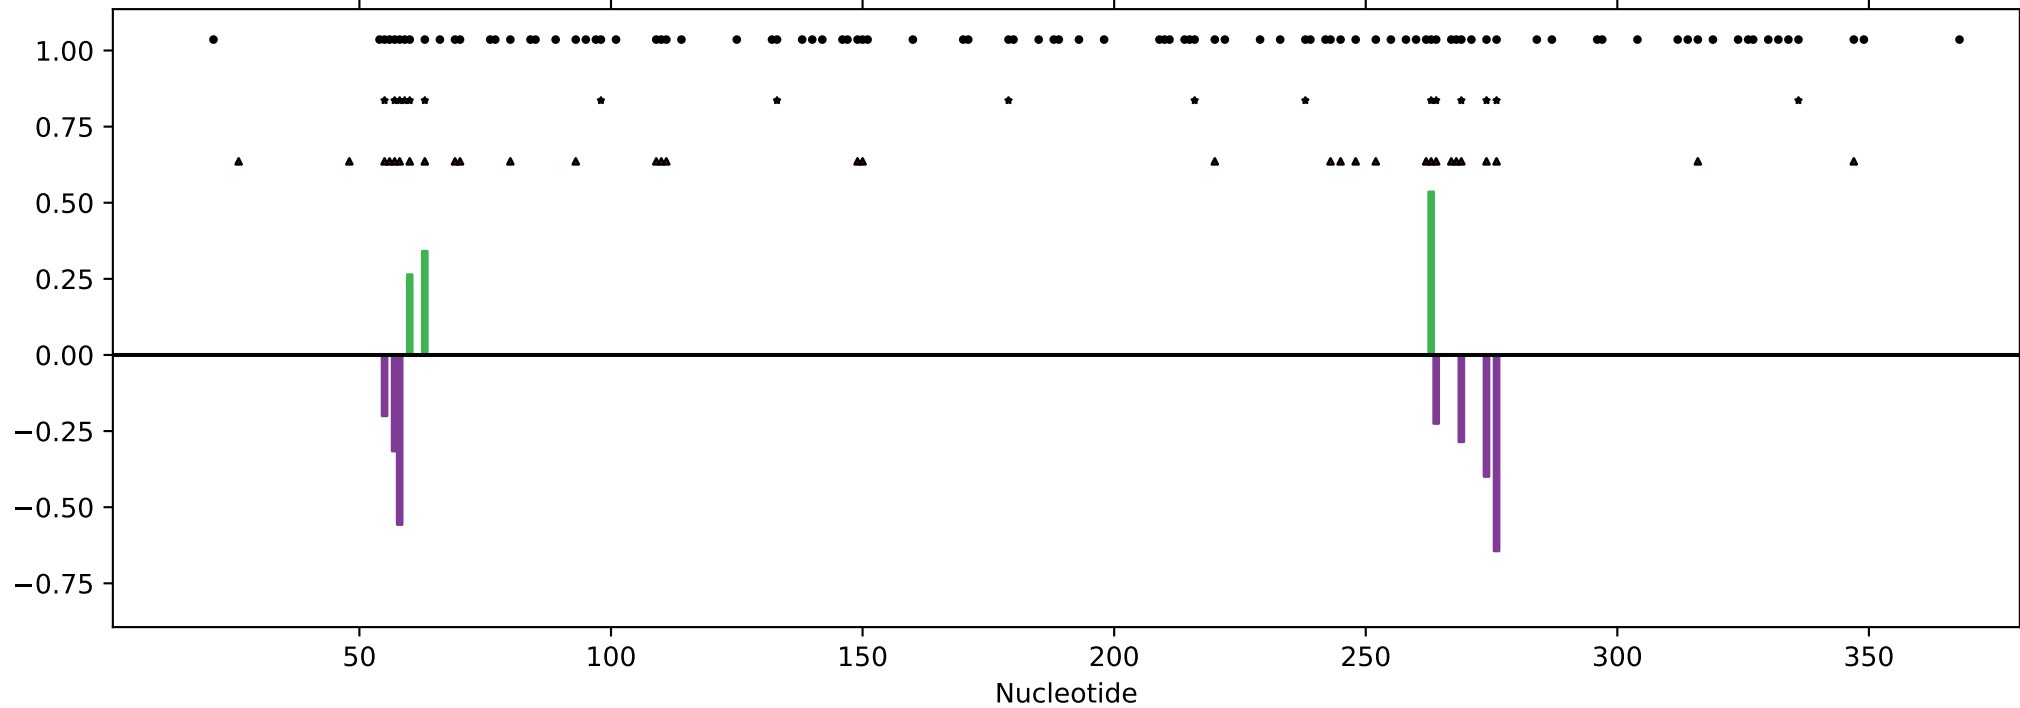

Supplement: Supplementary file 8 [file threeG_dimer_vs_oneGtwoG_monomer.pdf › deltaSHAPE/threeG_dimer_vs_oneGtwoG_monomer.pdf]

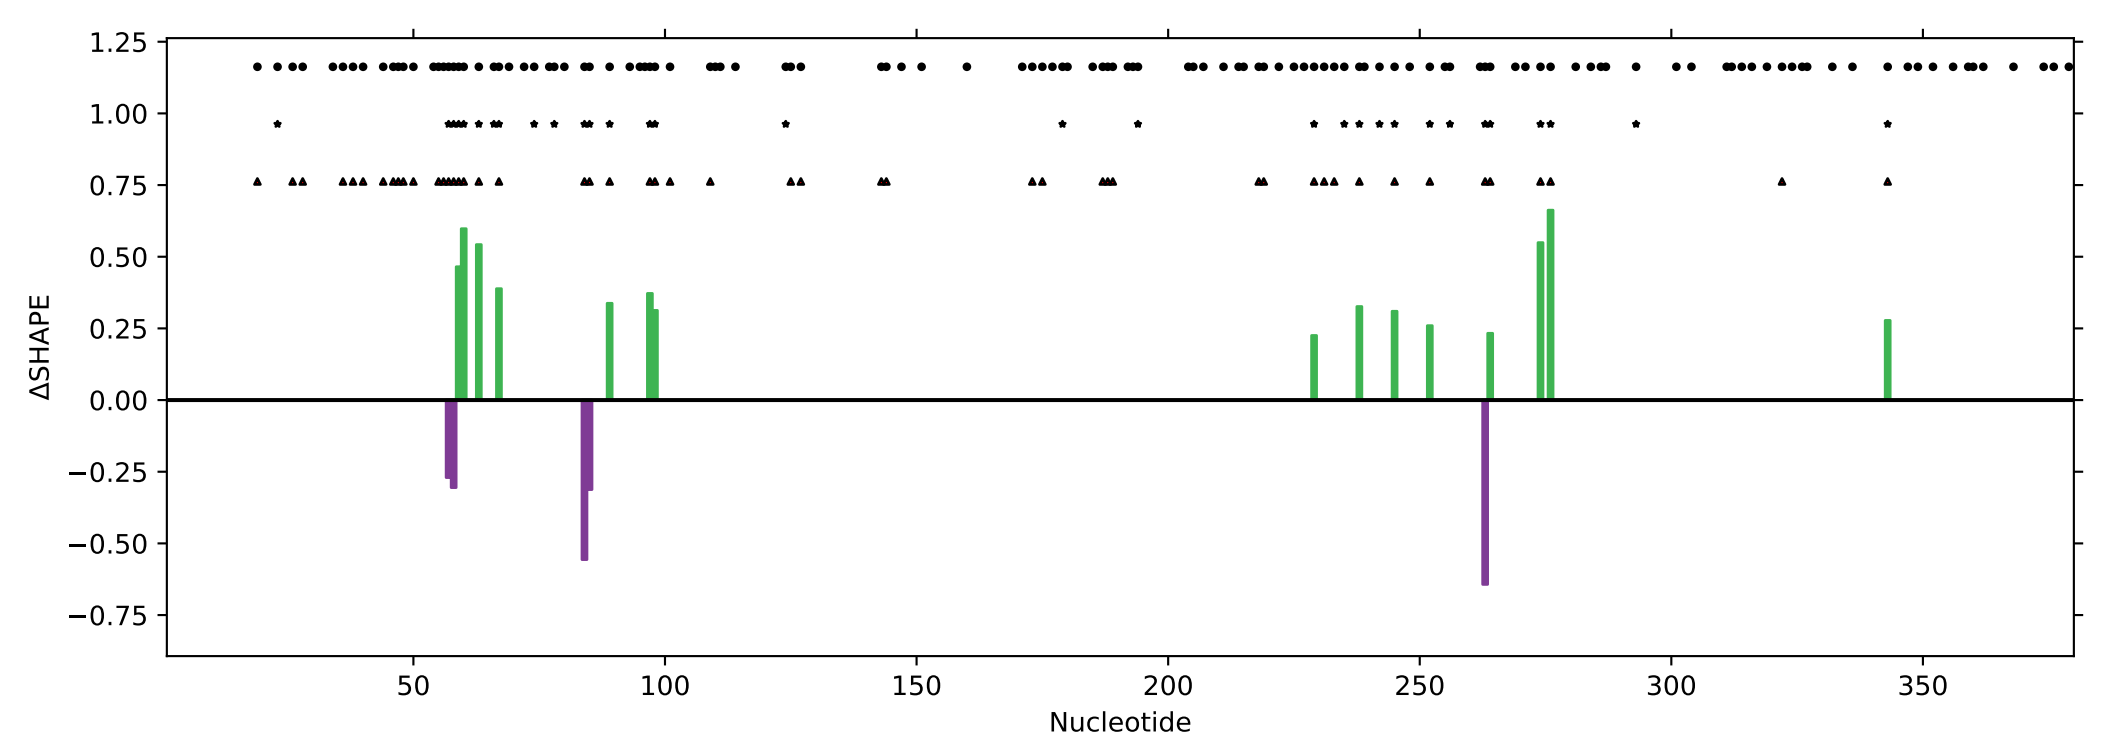

Supplement: Supplementary file 9 [file threeG_monomer_vs_oneGtwoG_dimer.pdf › deltaSHAPE/threeG_monomer_vs_oneGtwoG_dimer.pdf]

$\Delta$ SHAPE

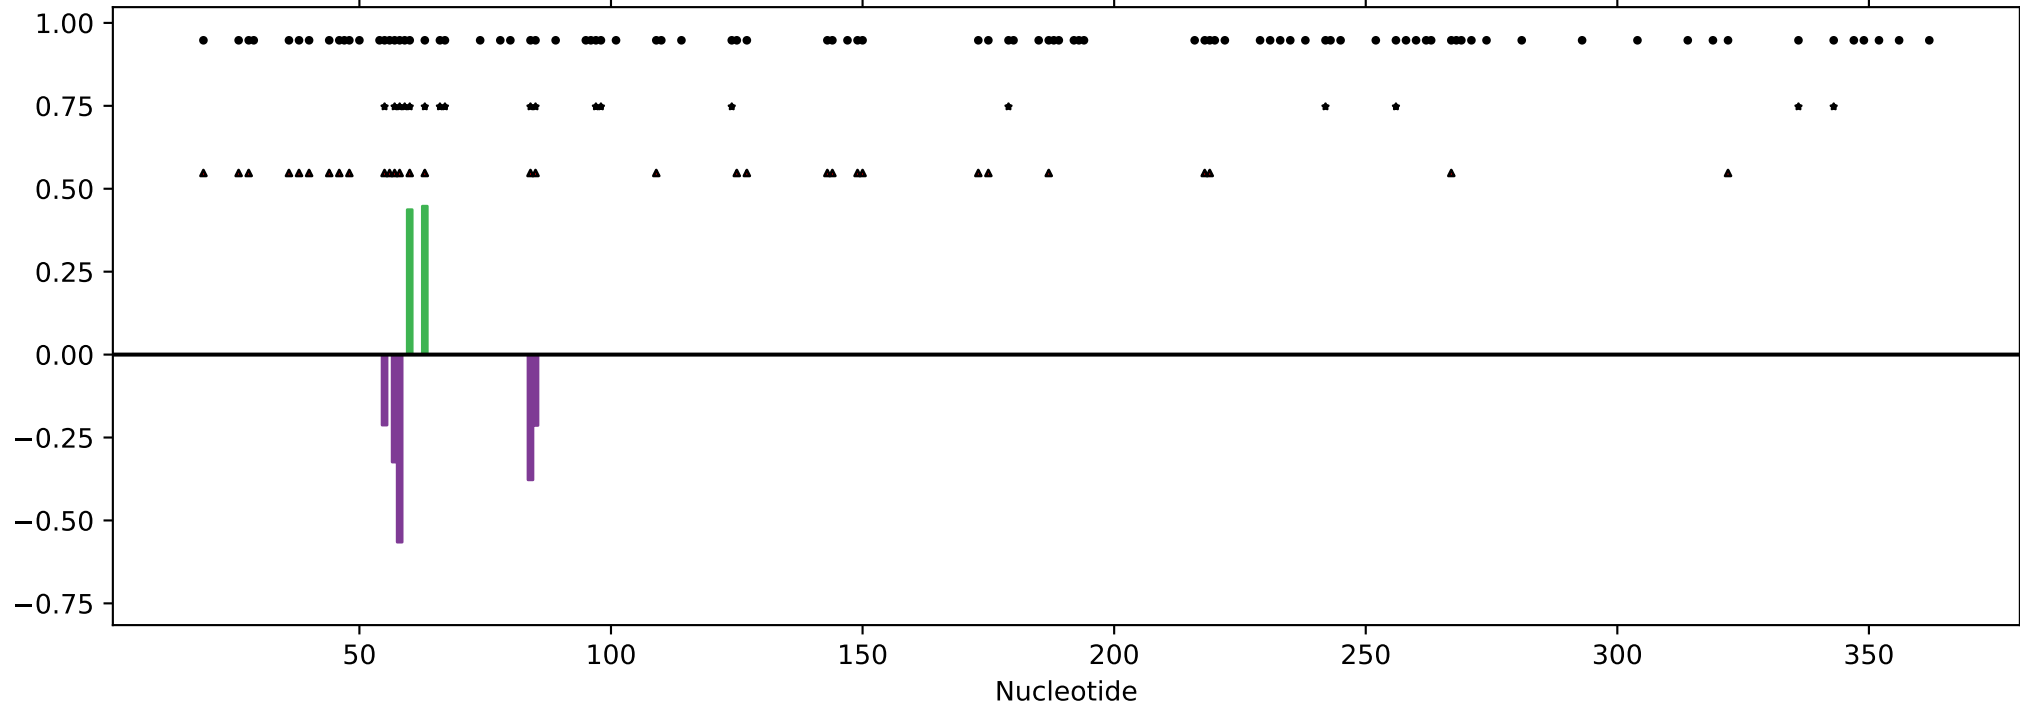

Supplement: Supplementary file 10 [file threeG_monomer_vs_oneGtwoG_monomer.pdf › deltaSHAPE/threeG_monomer_vs_oneGtwoG_monomer.pdf]

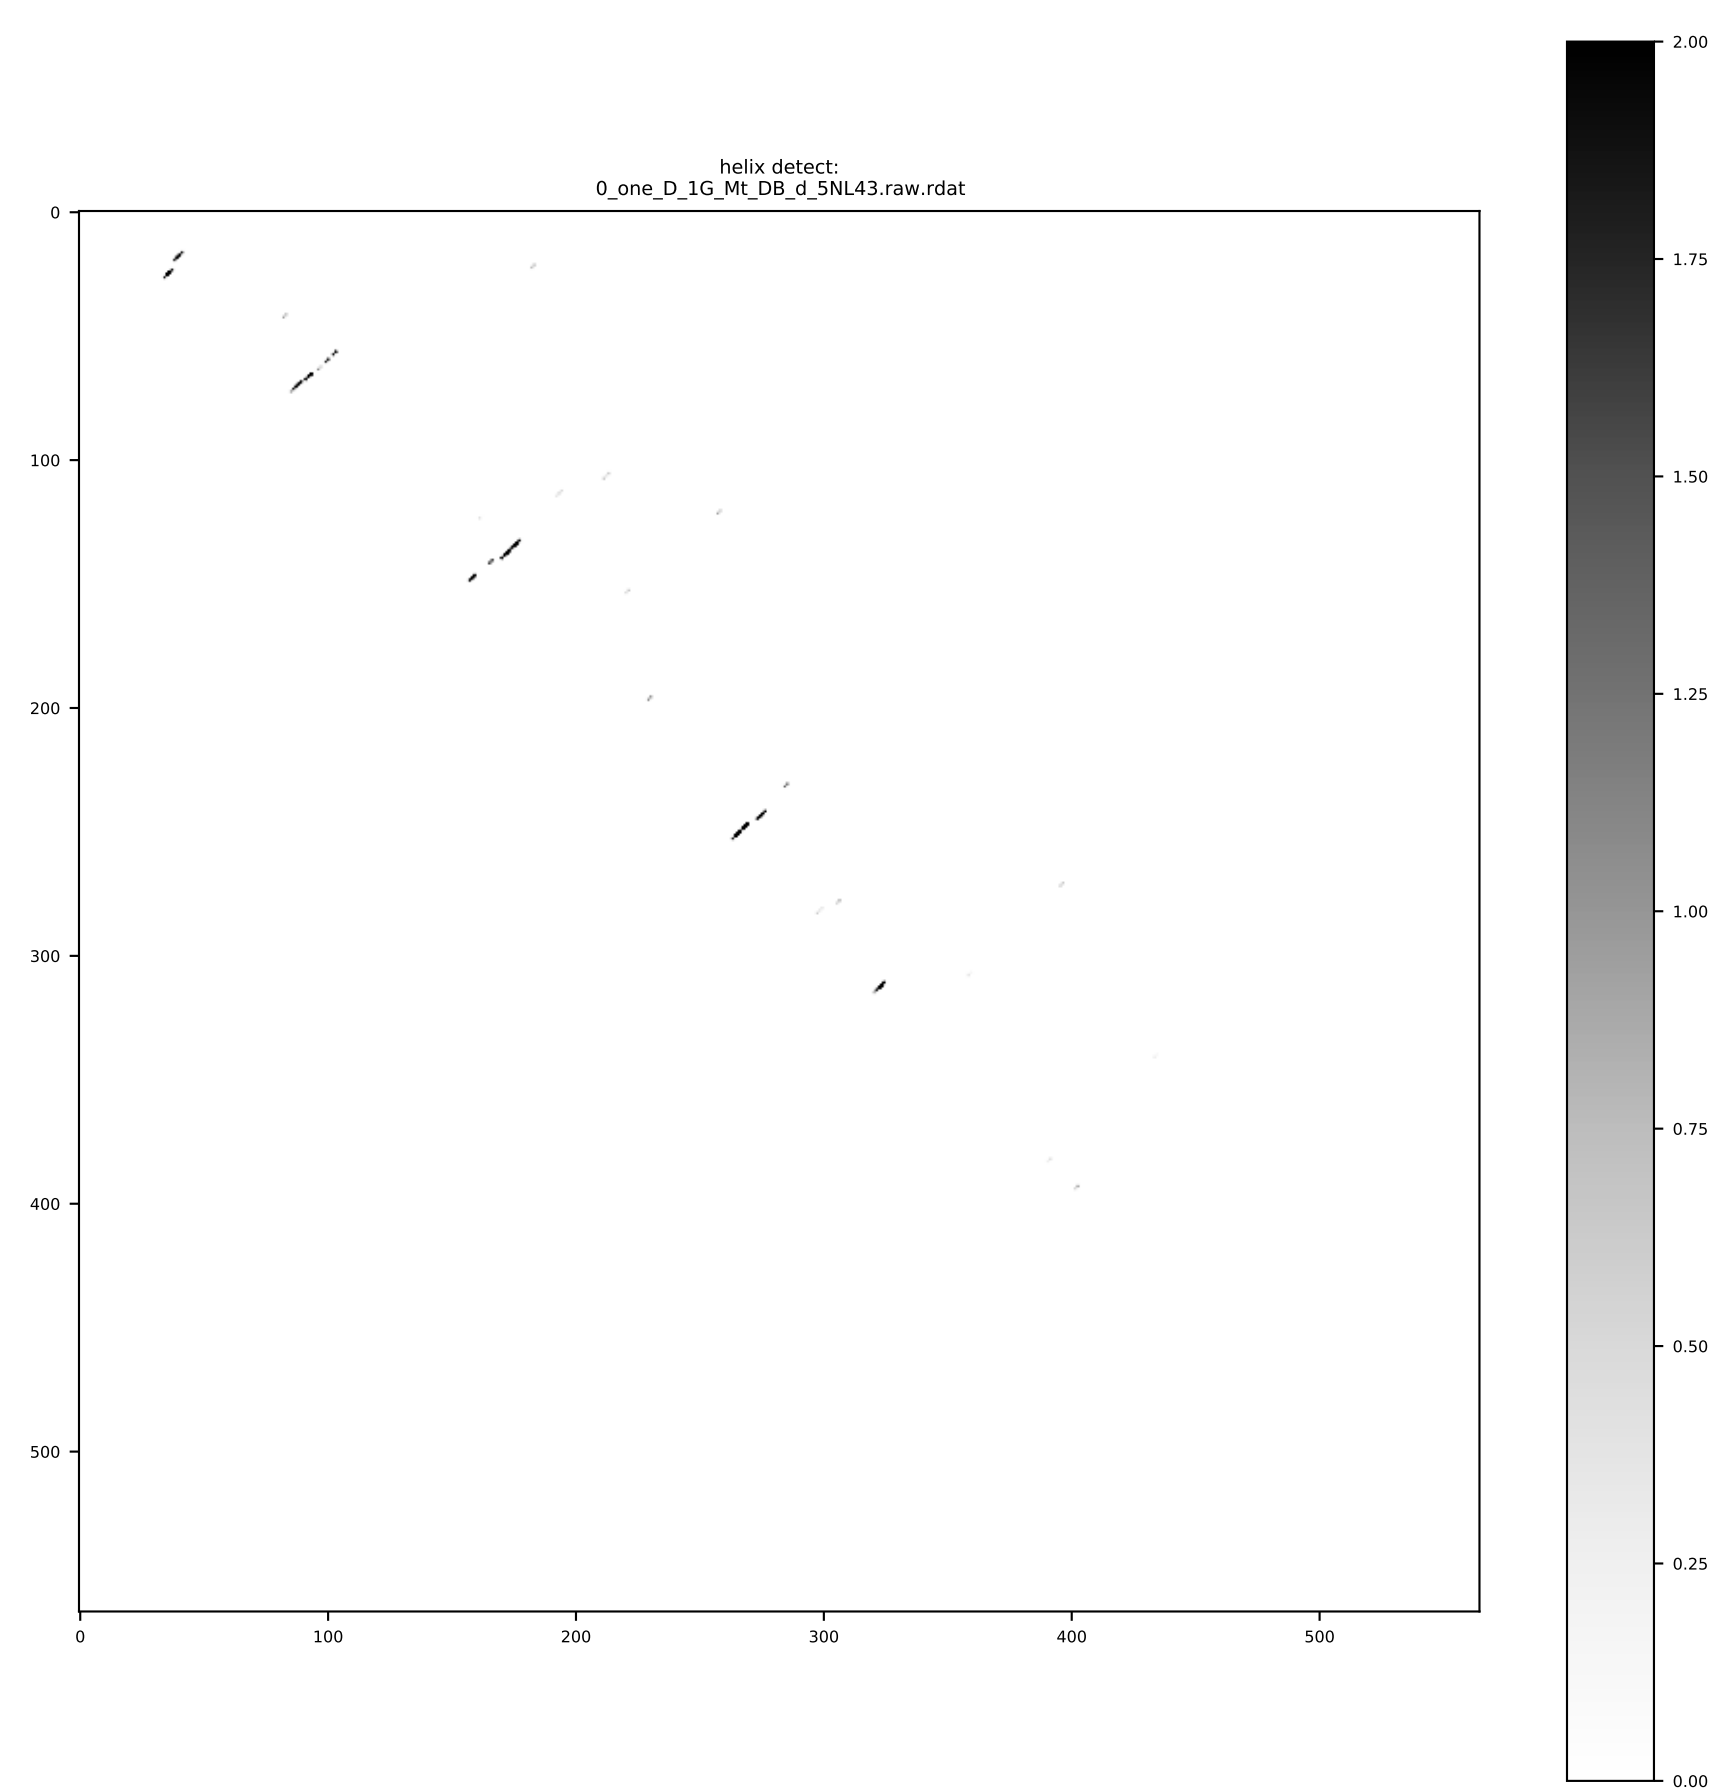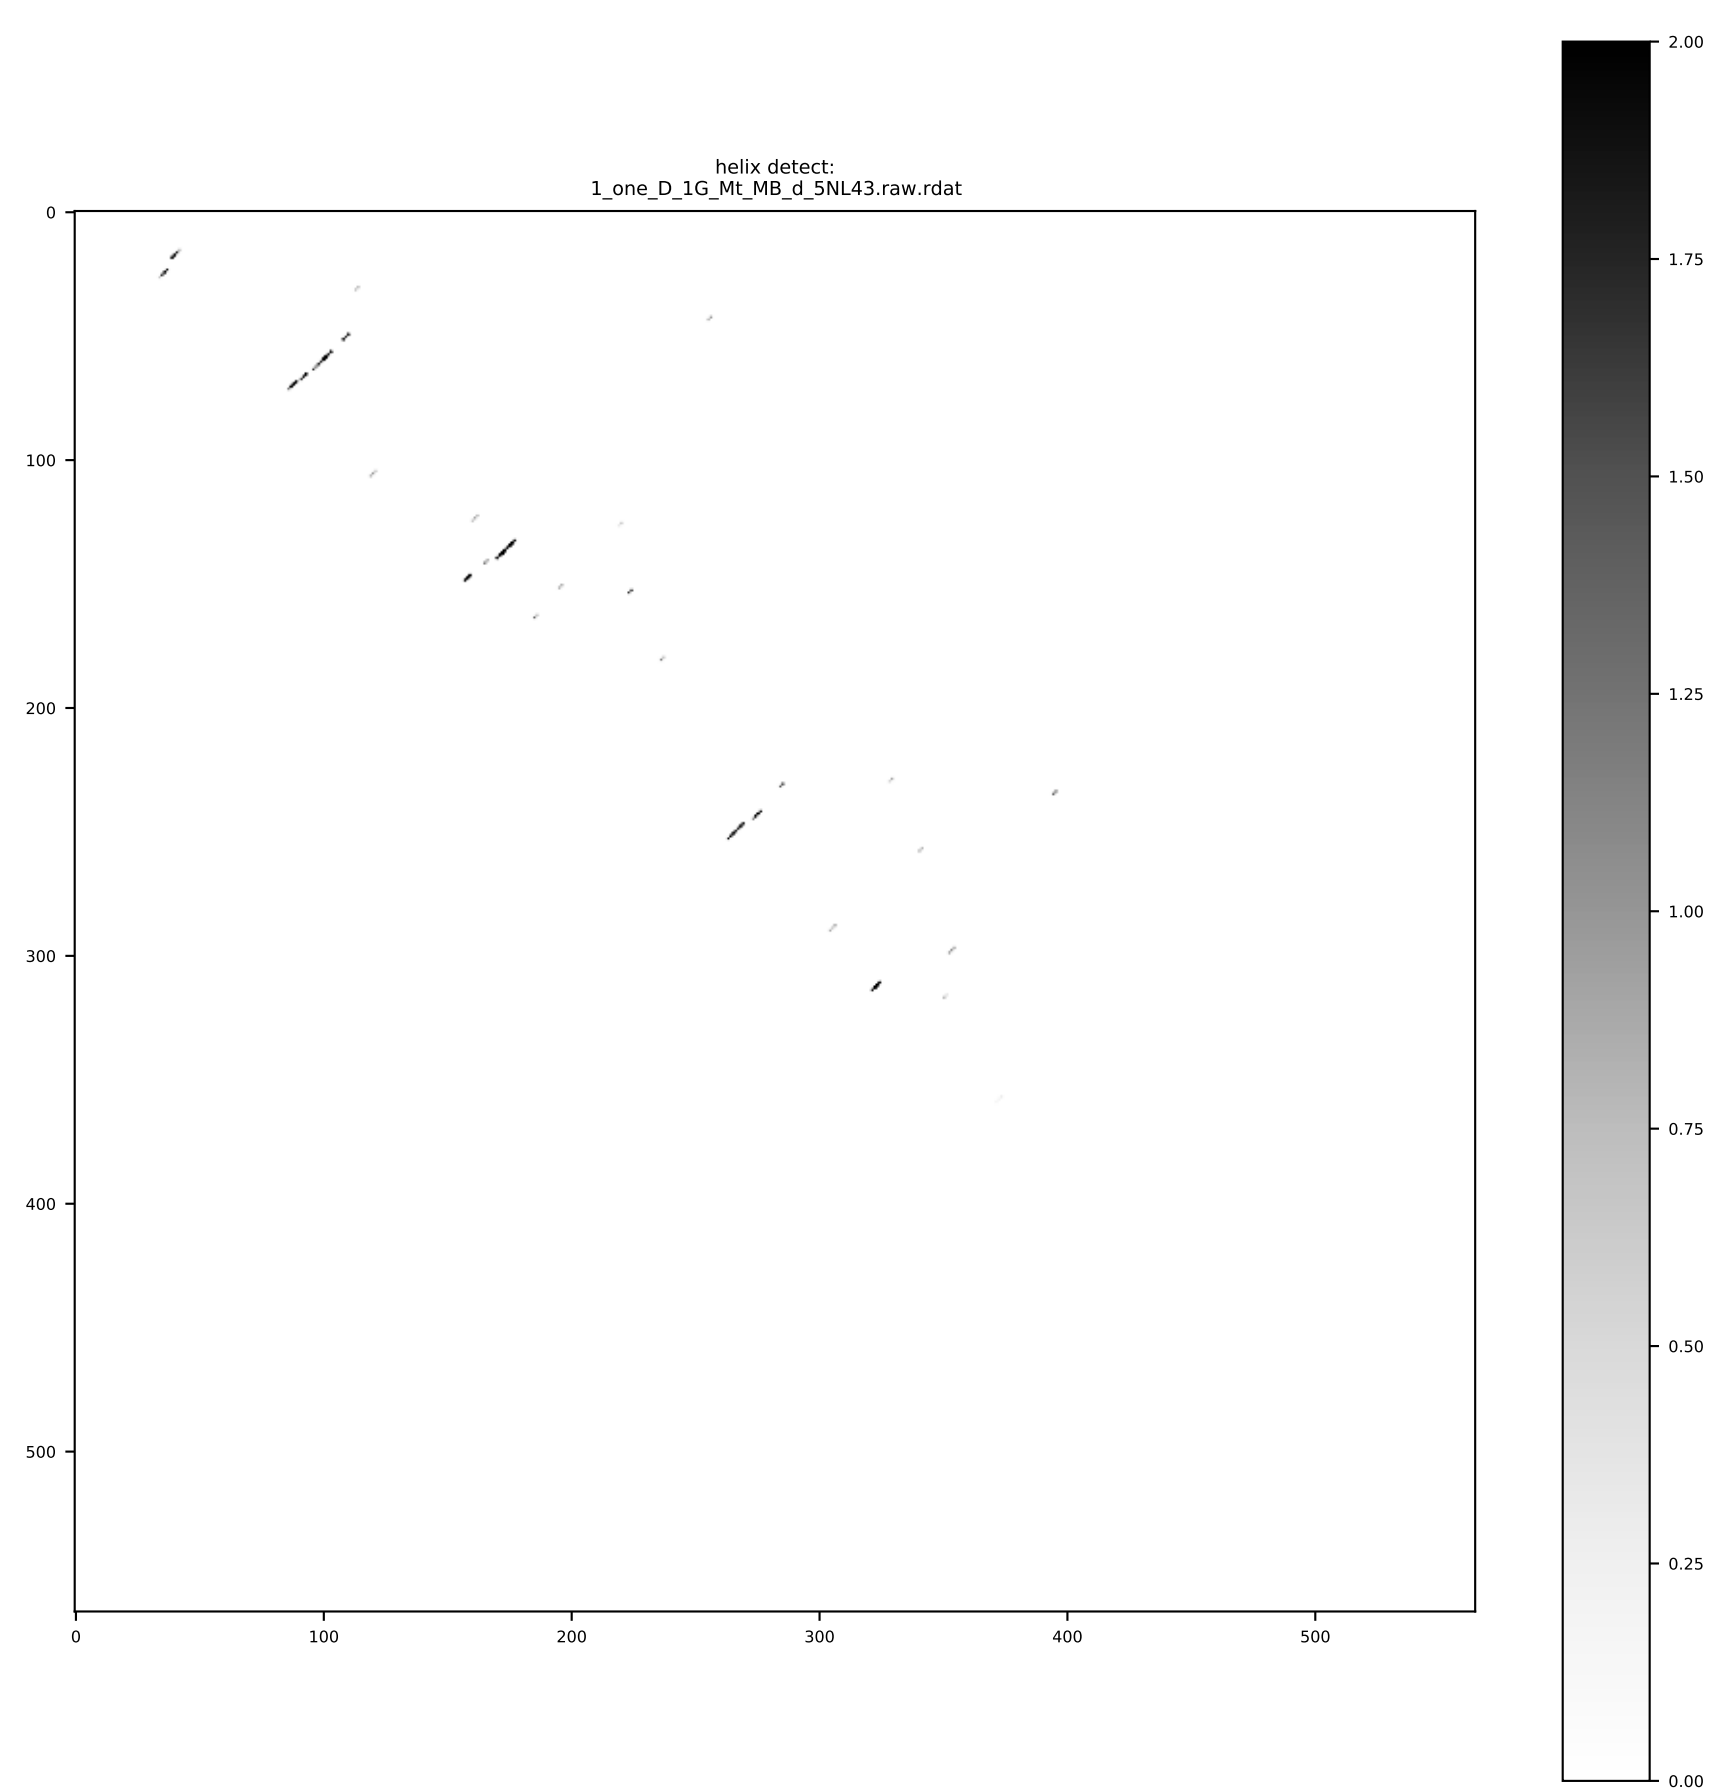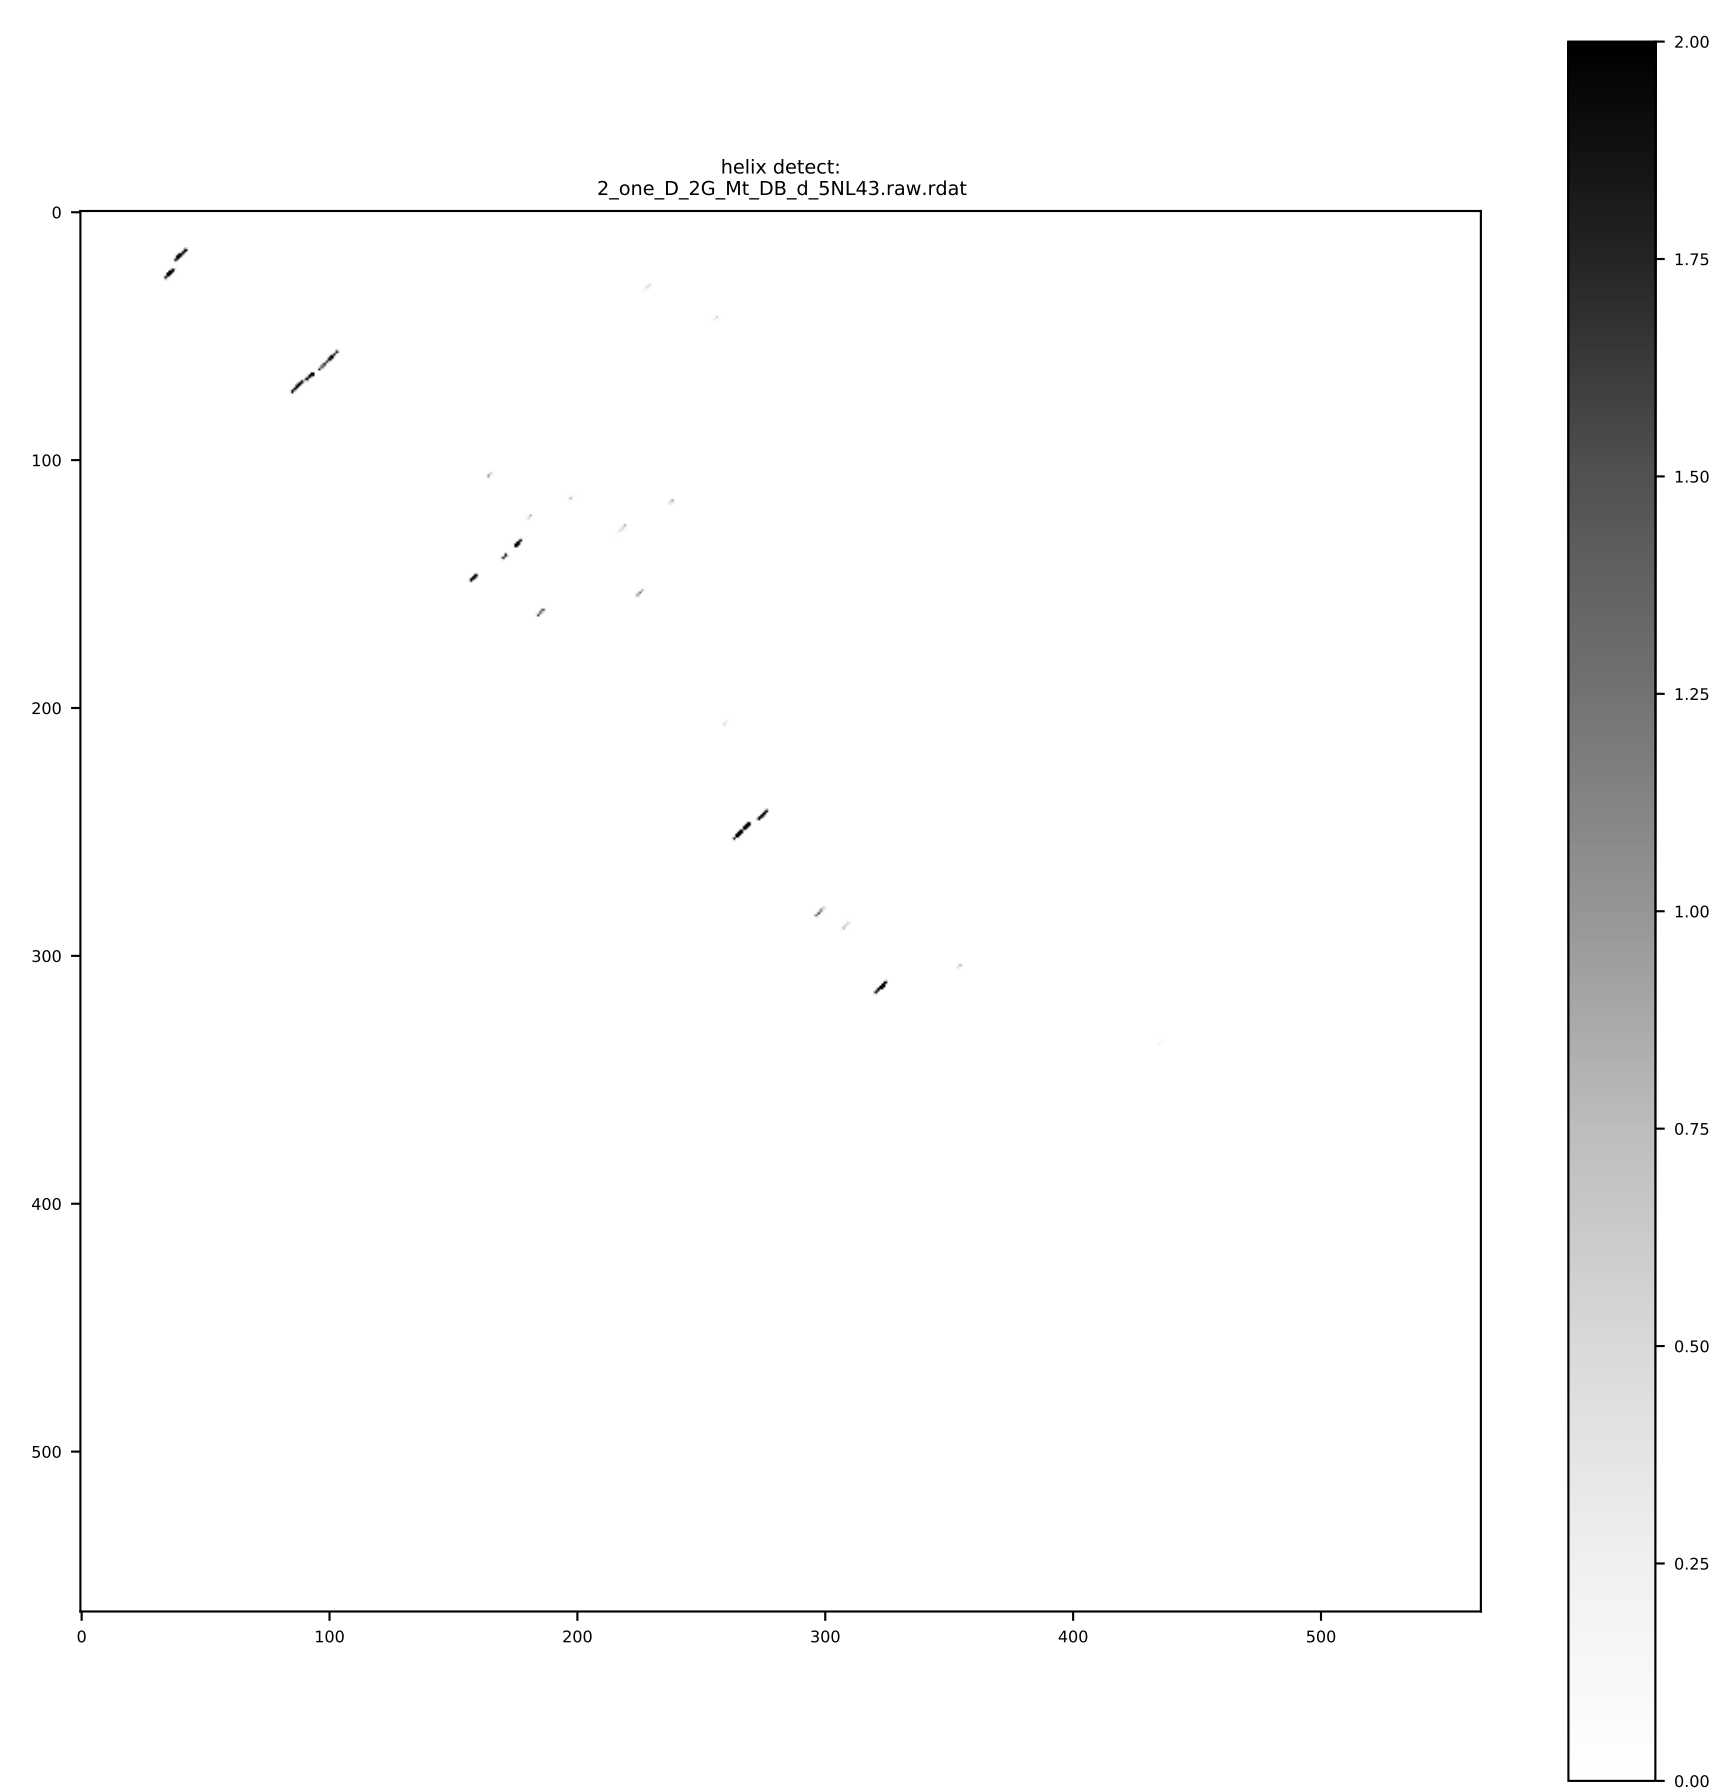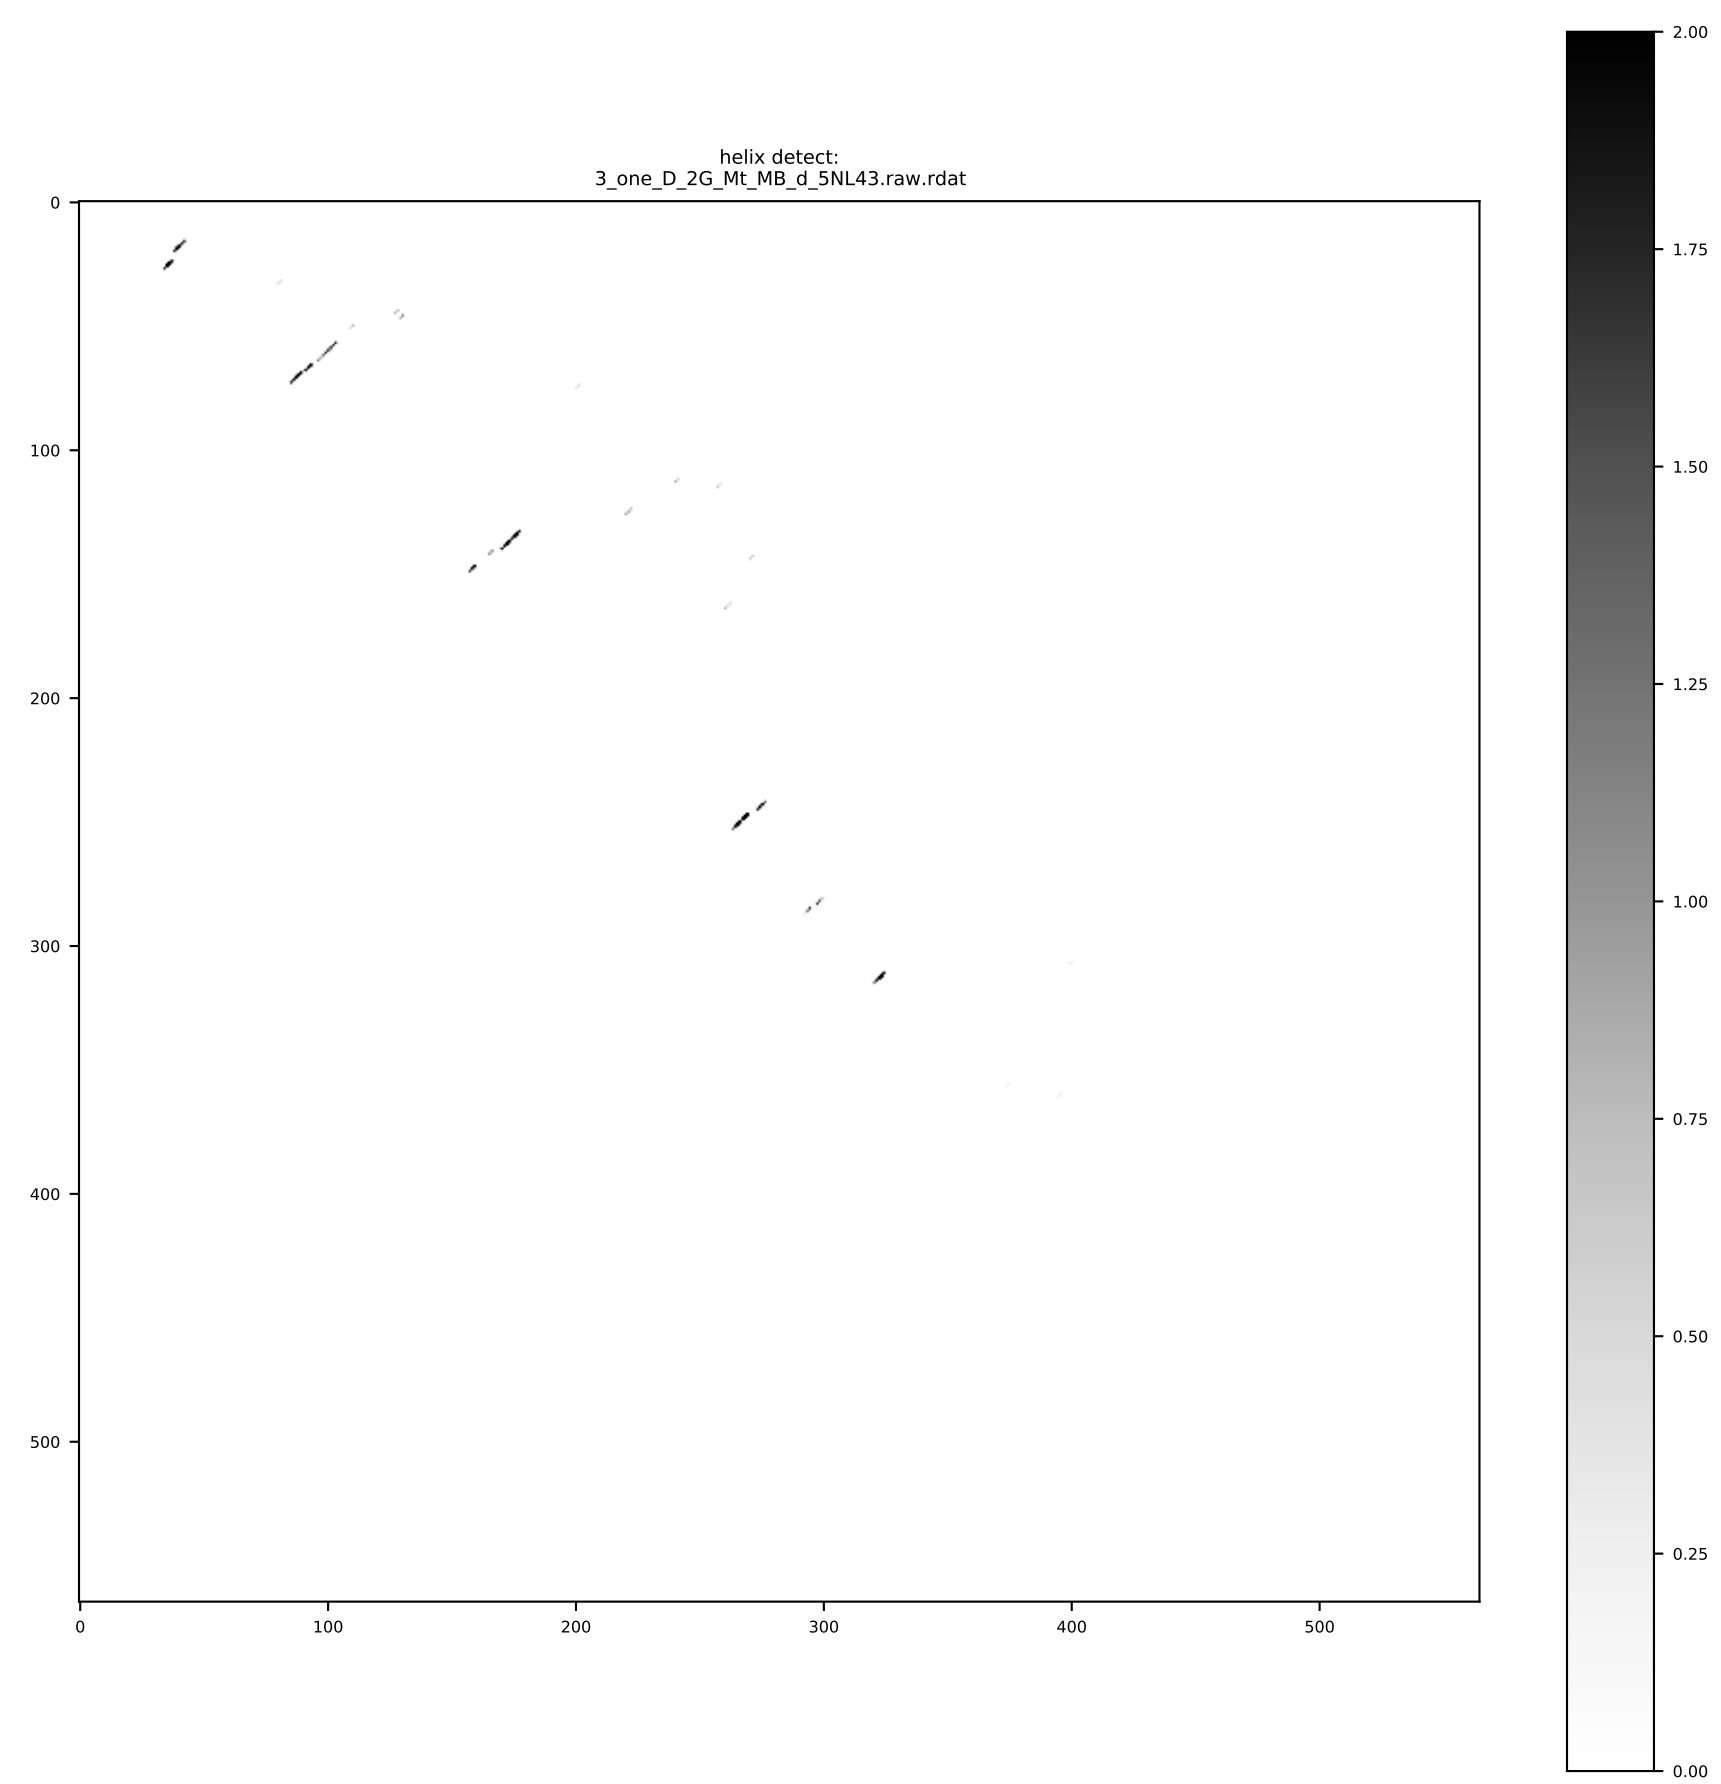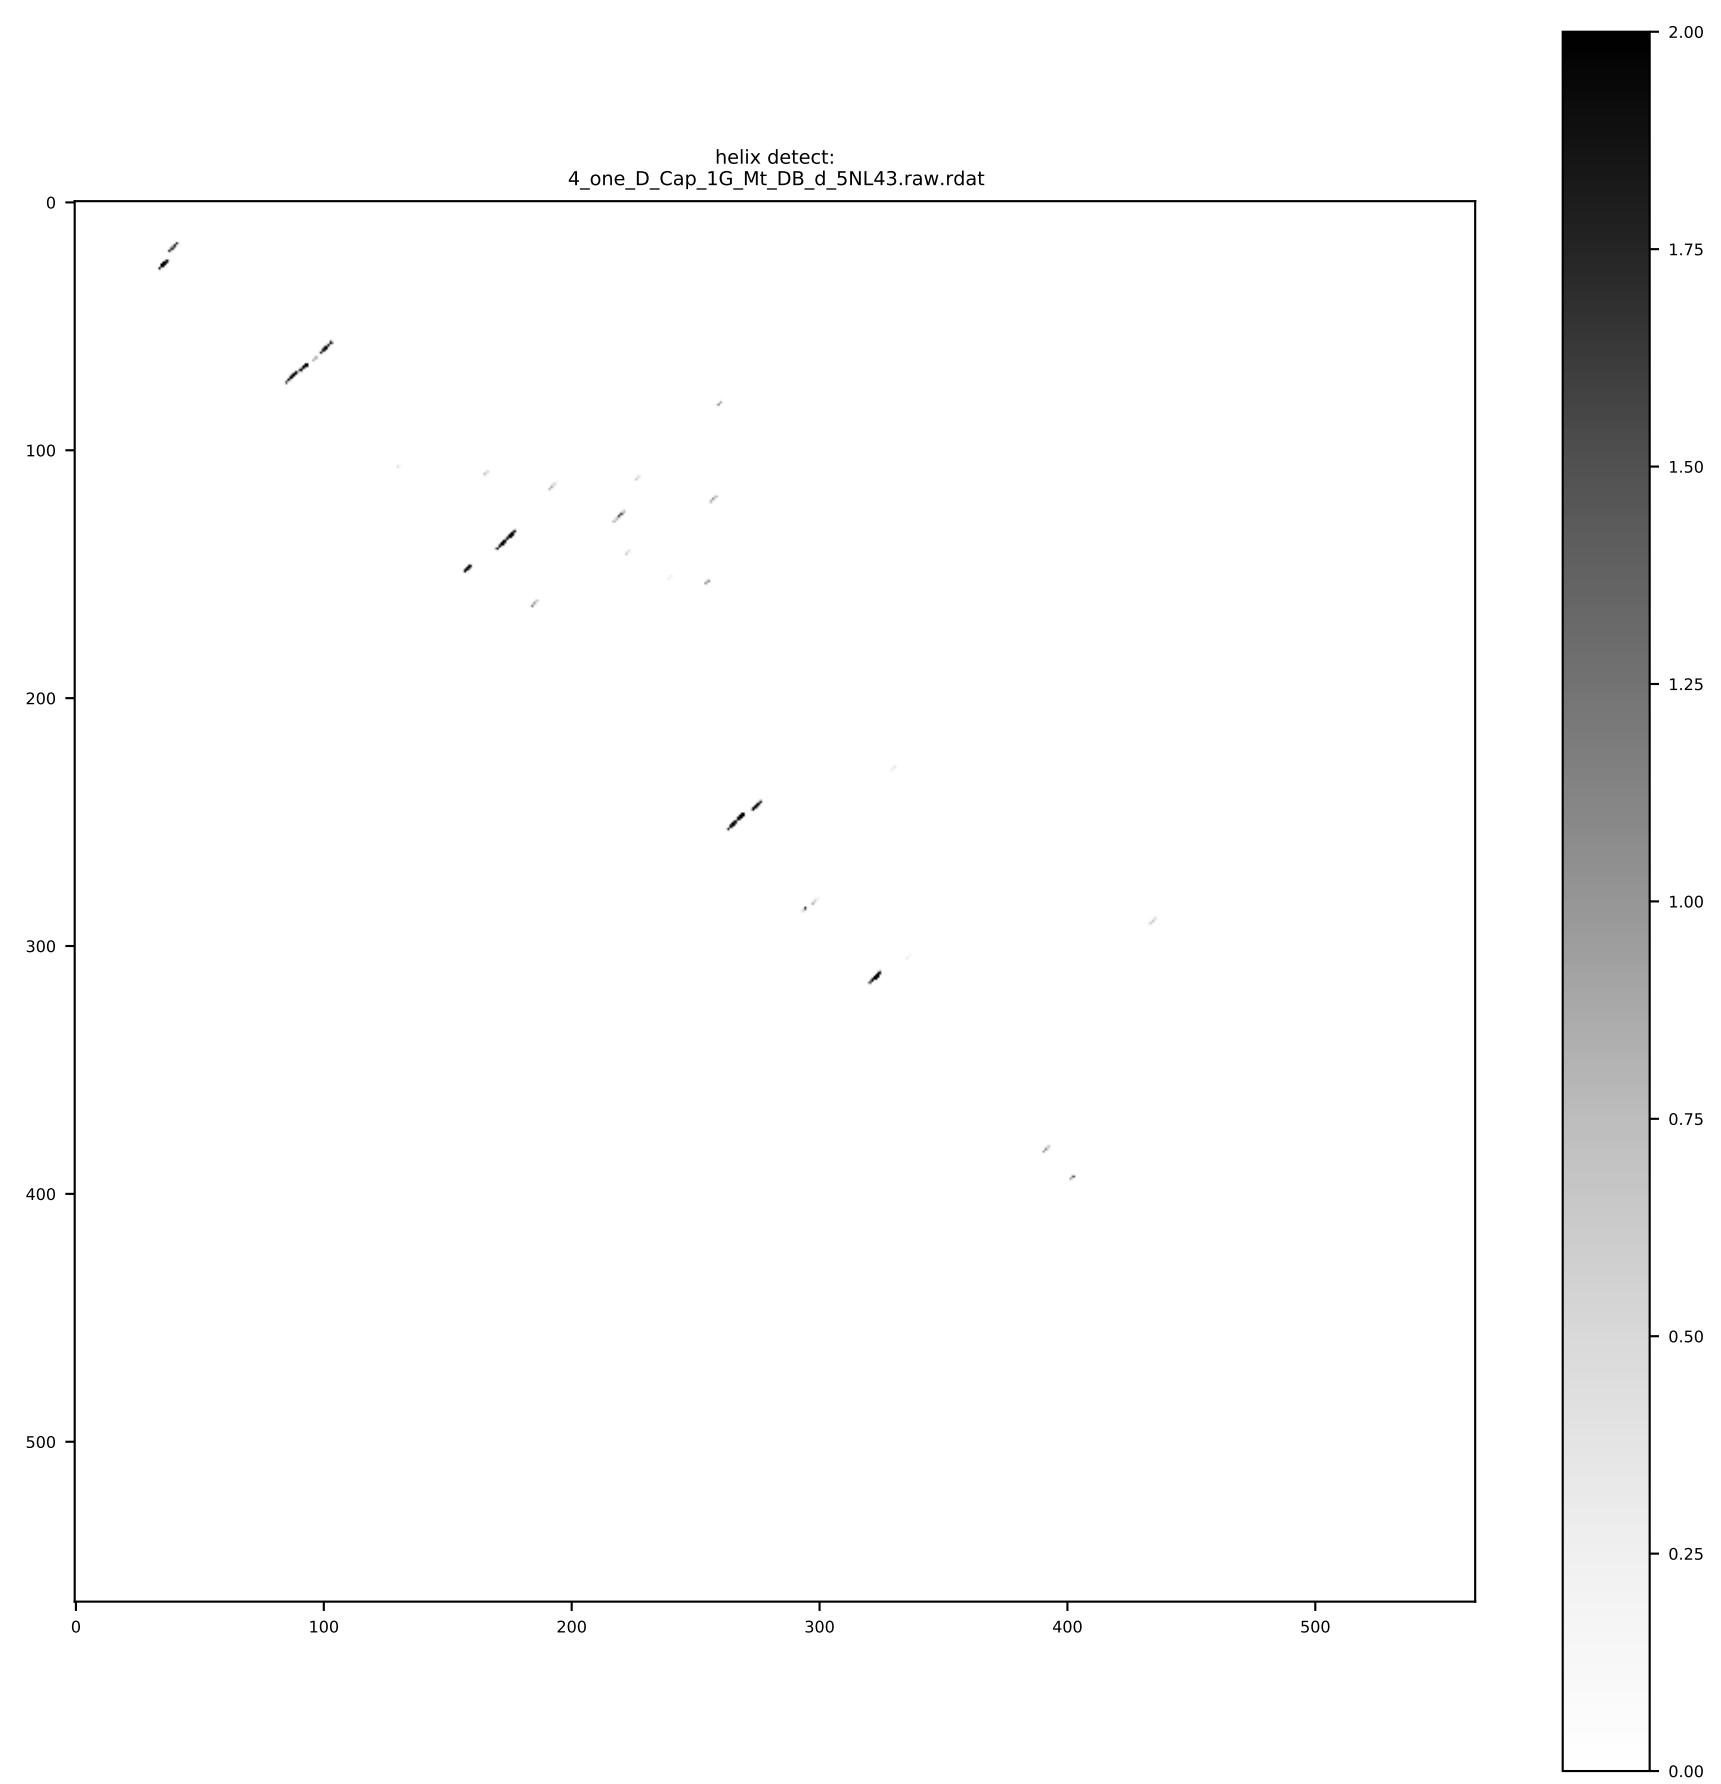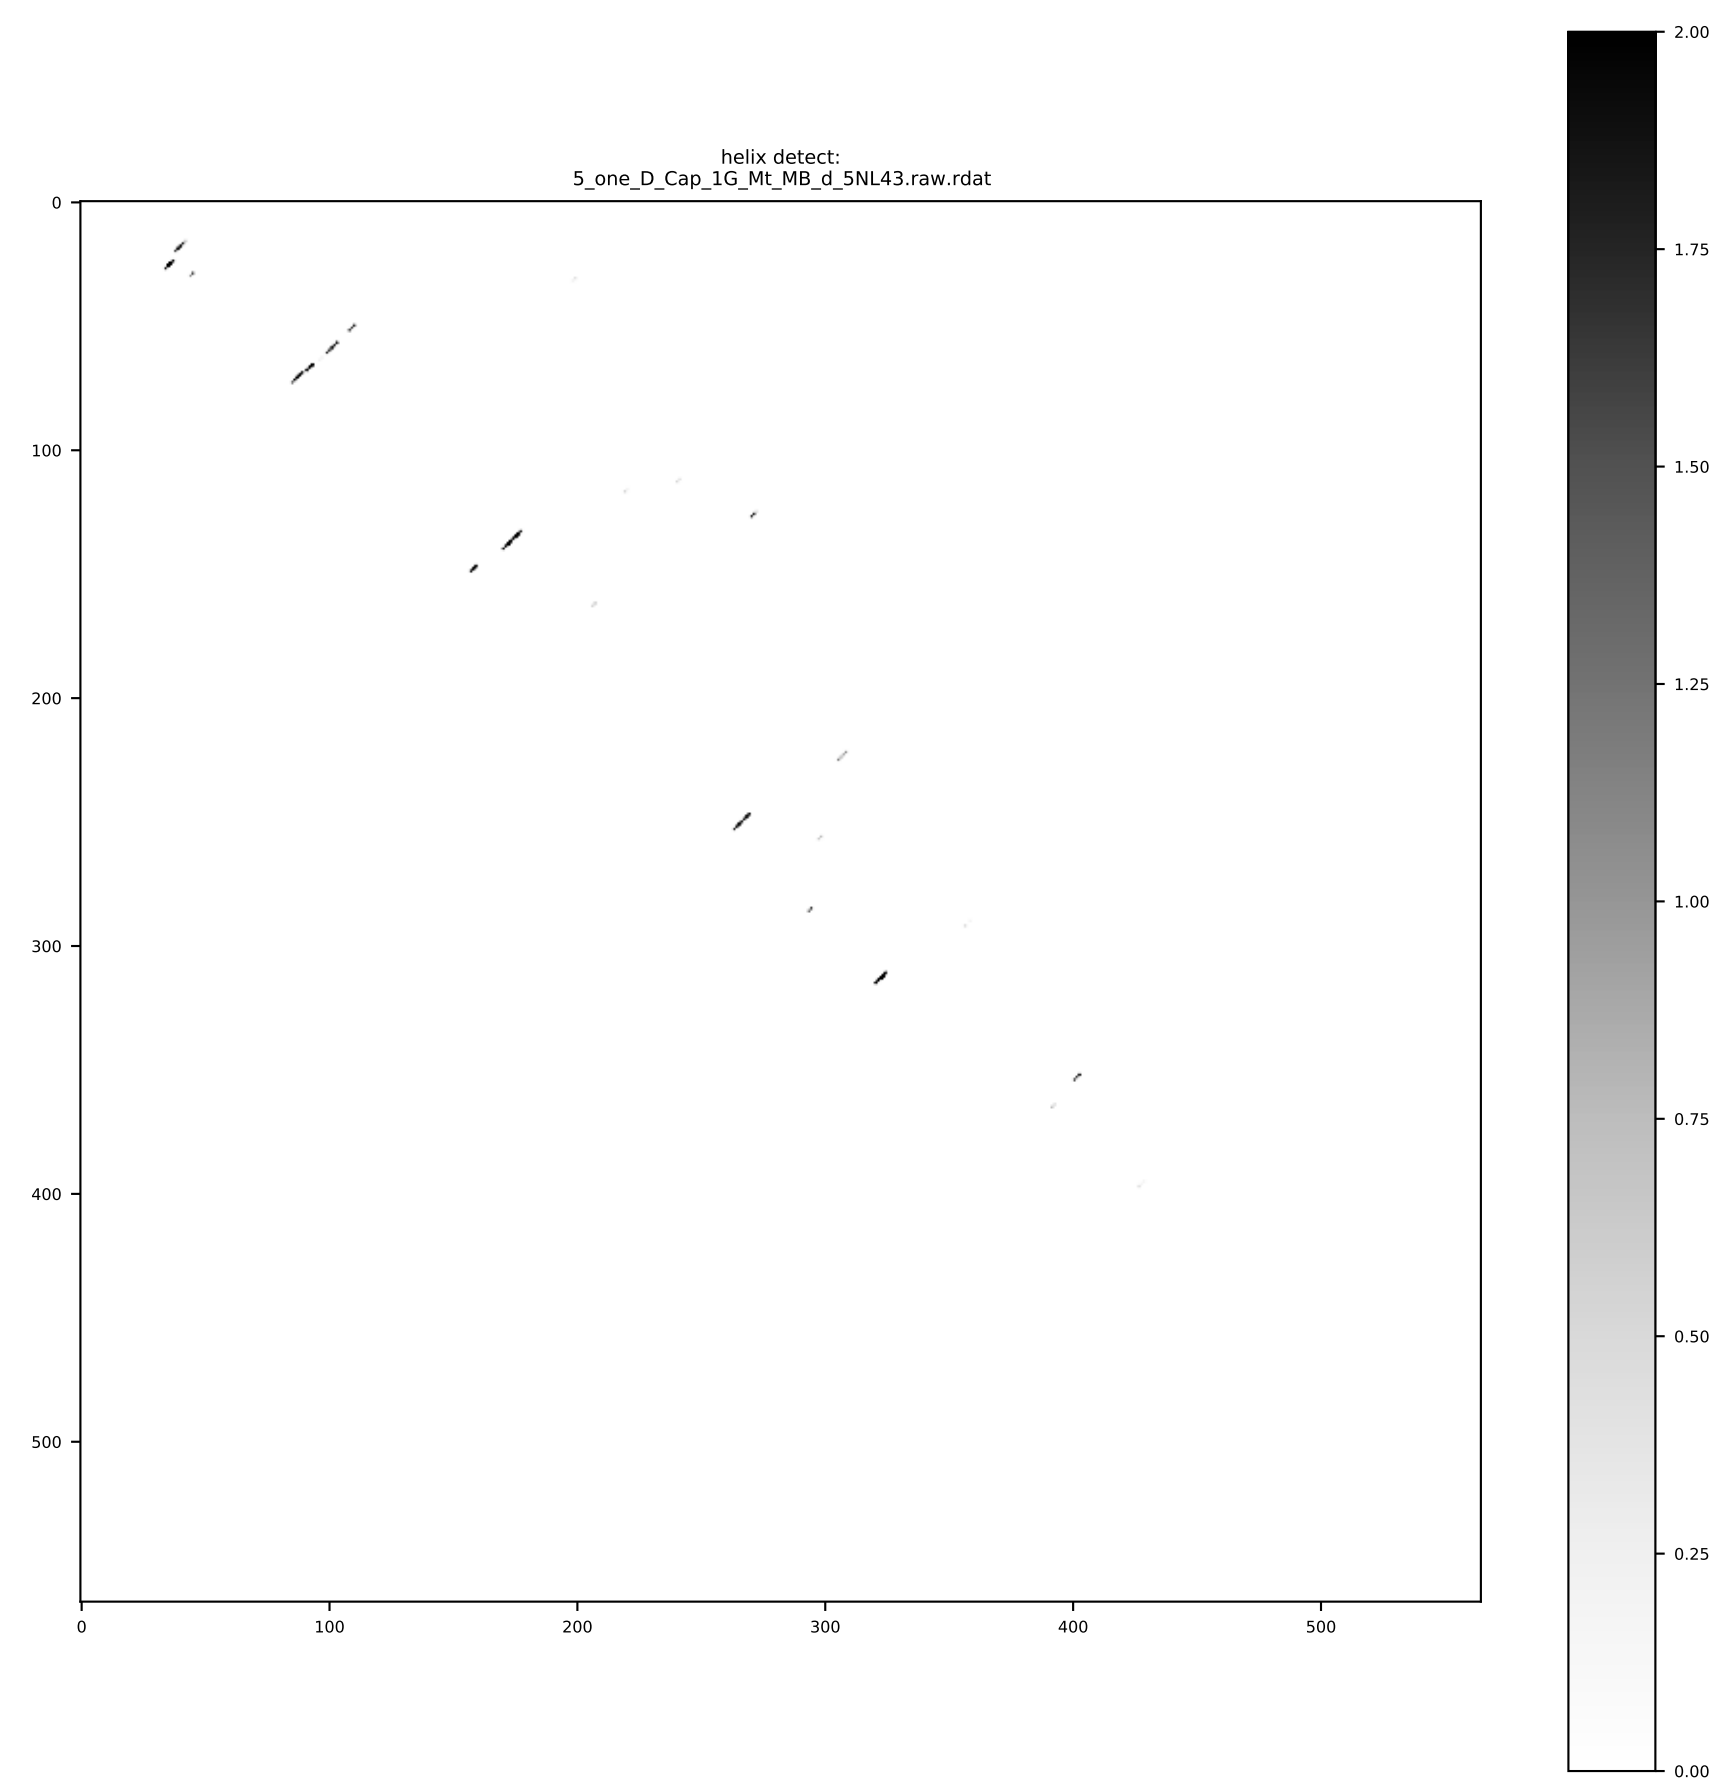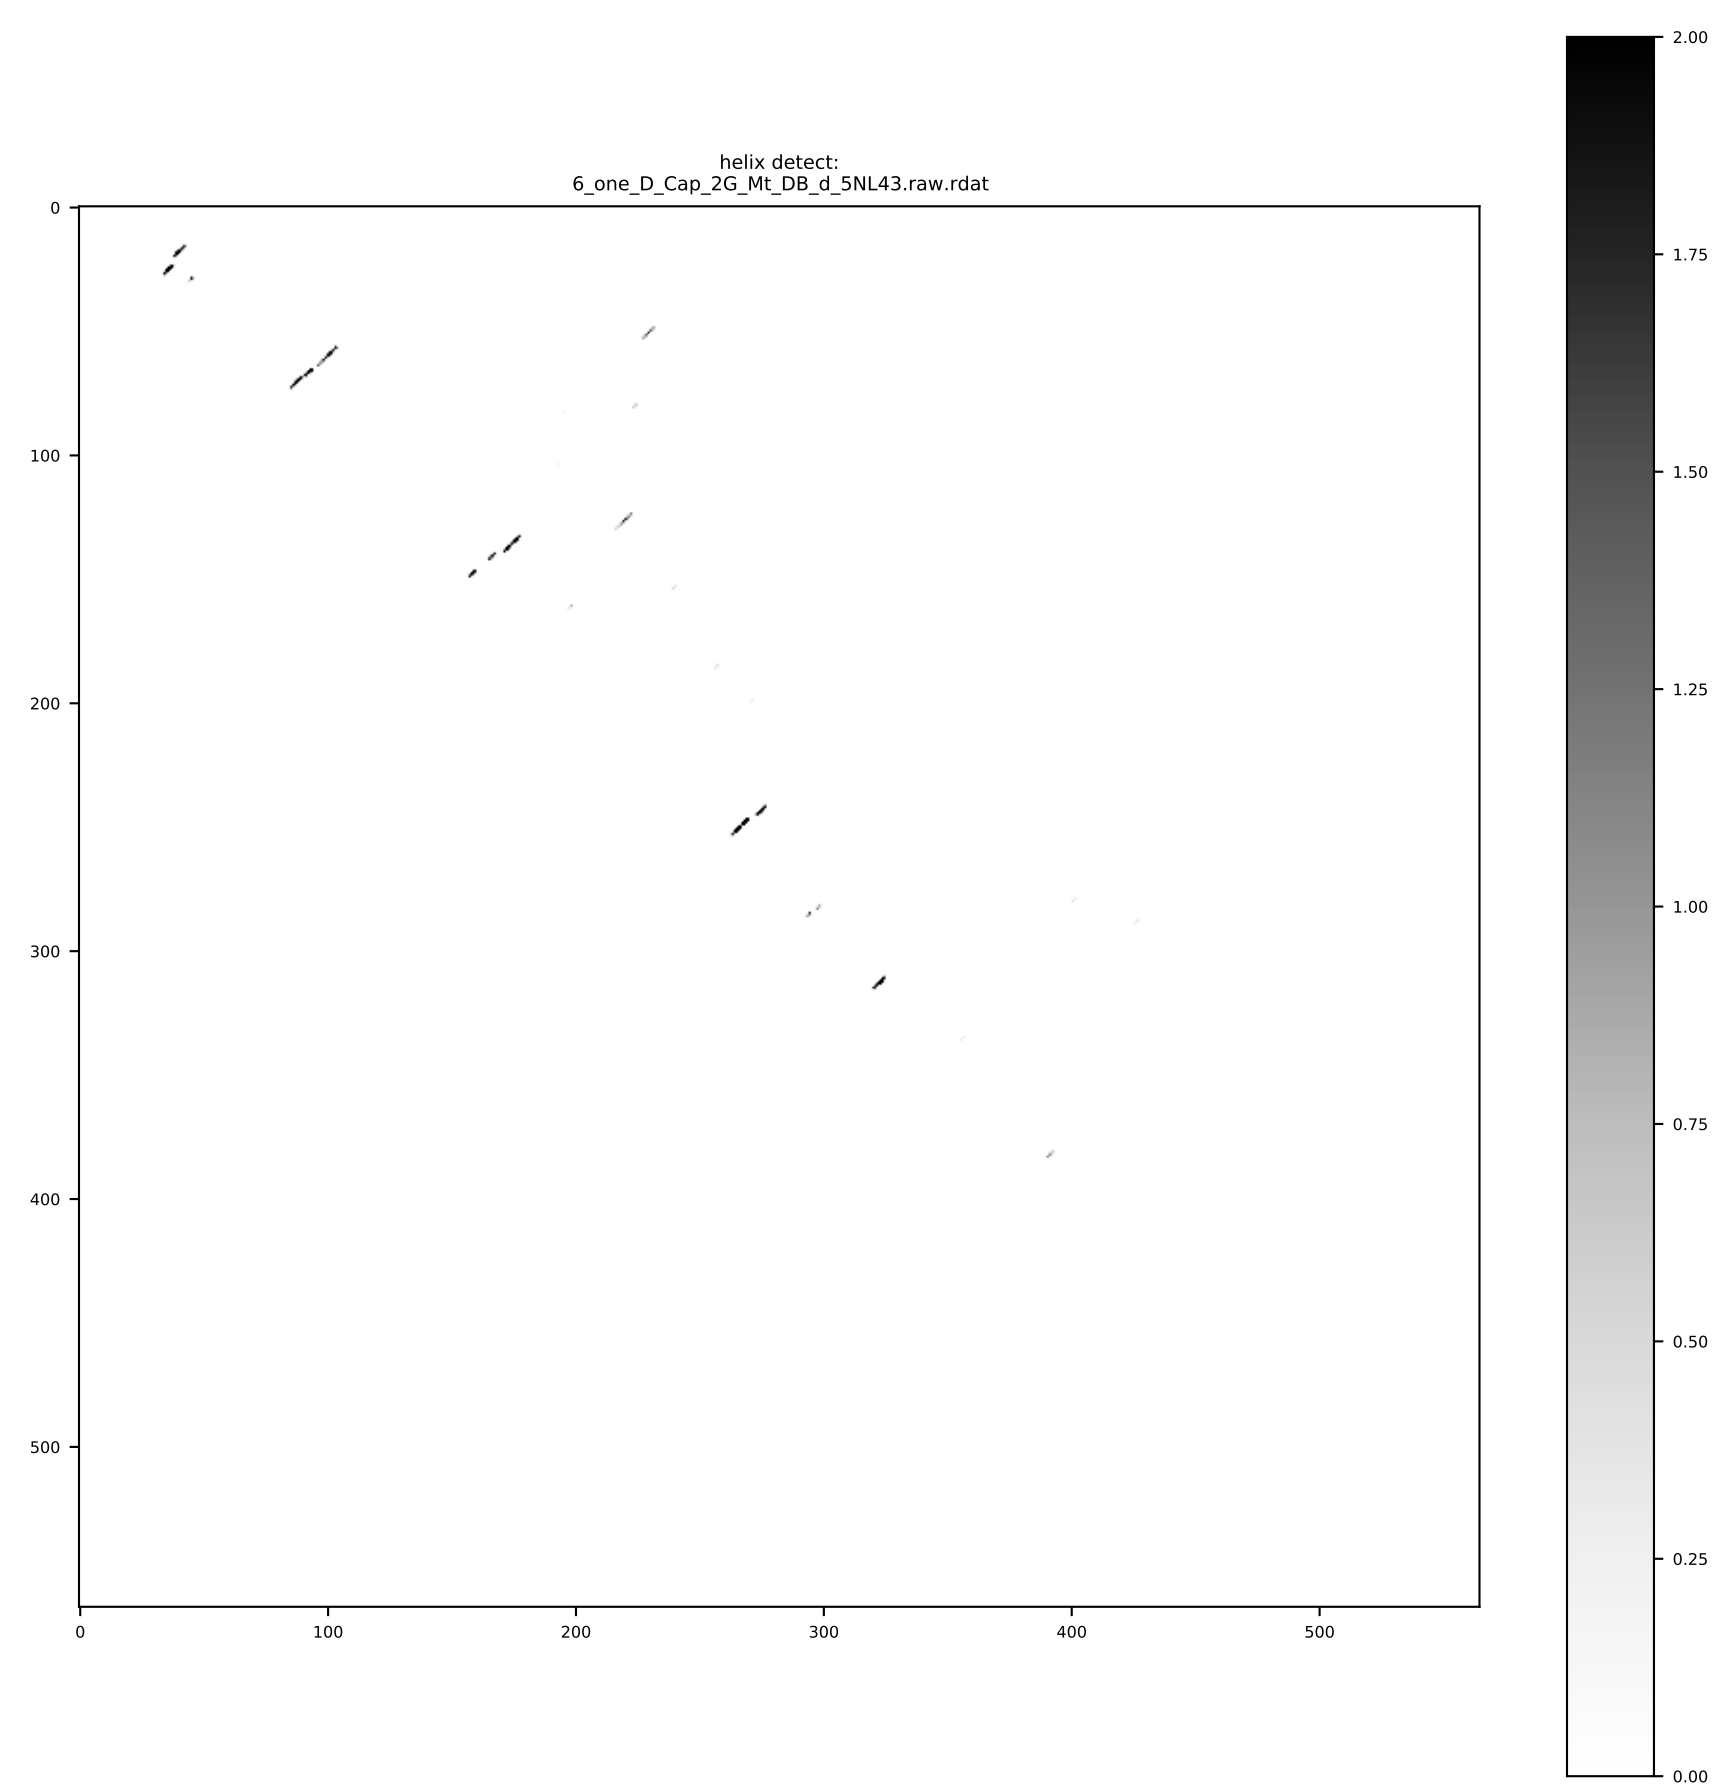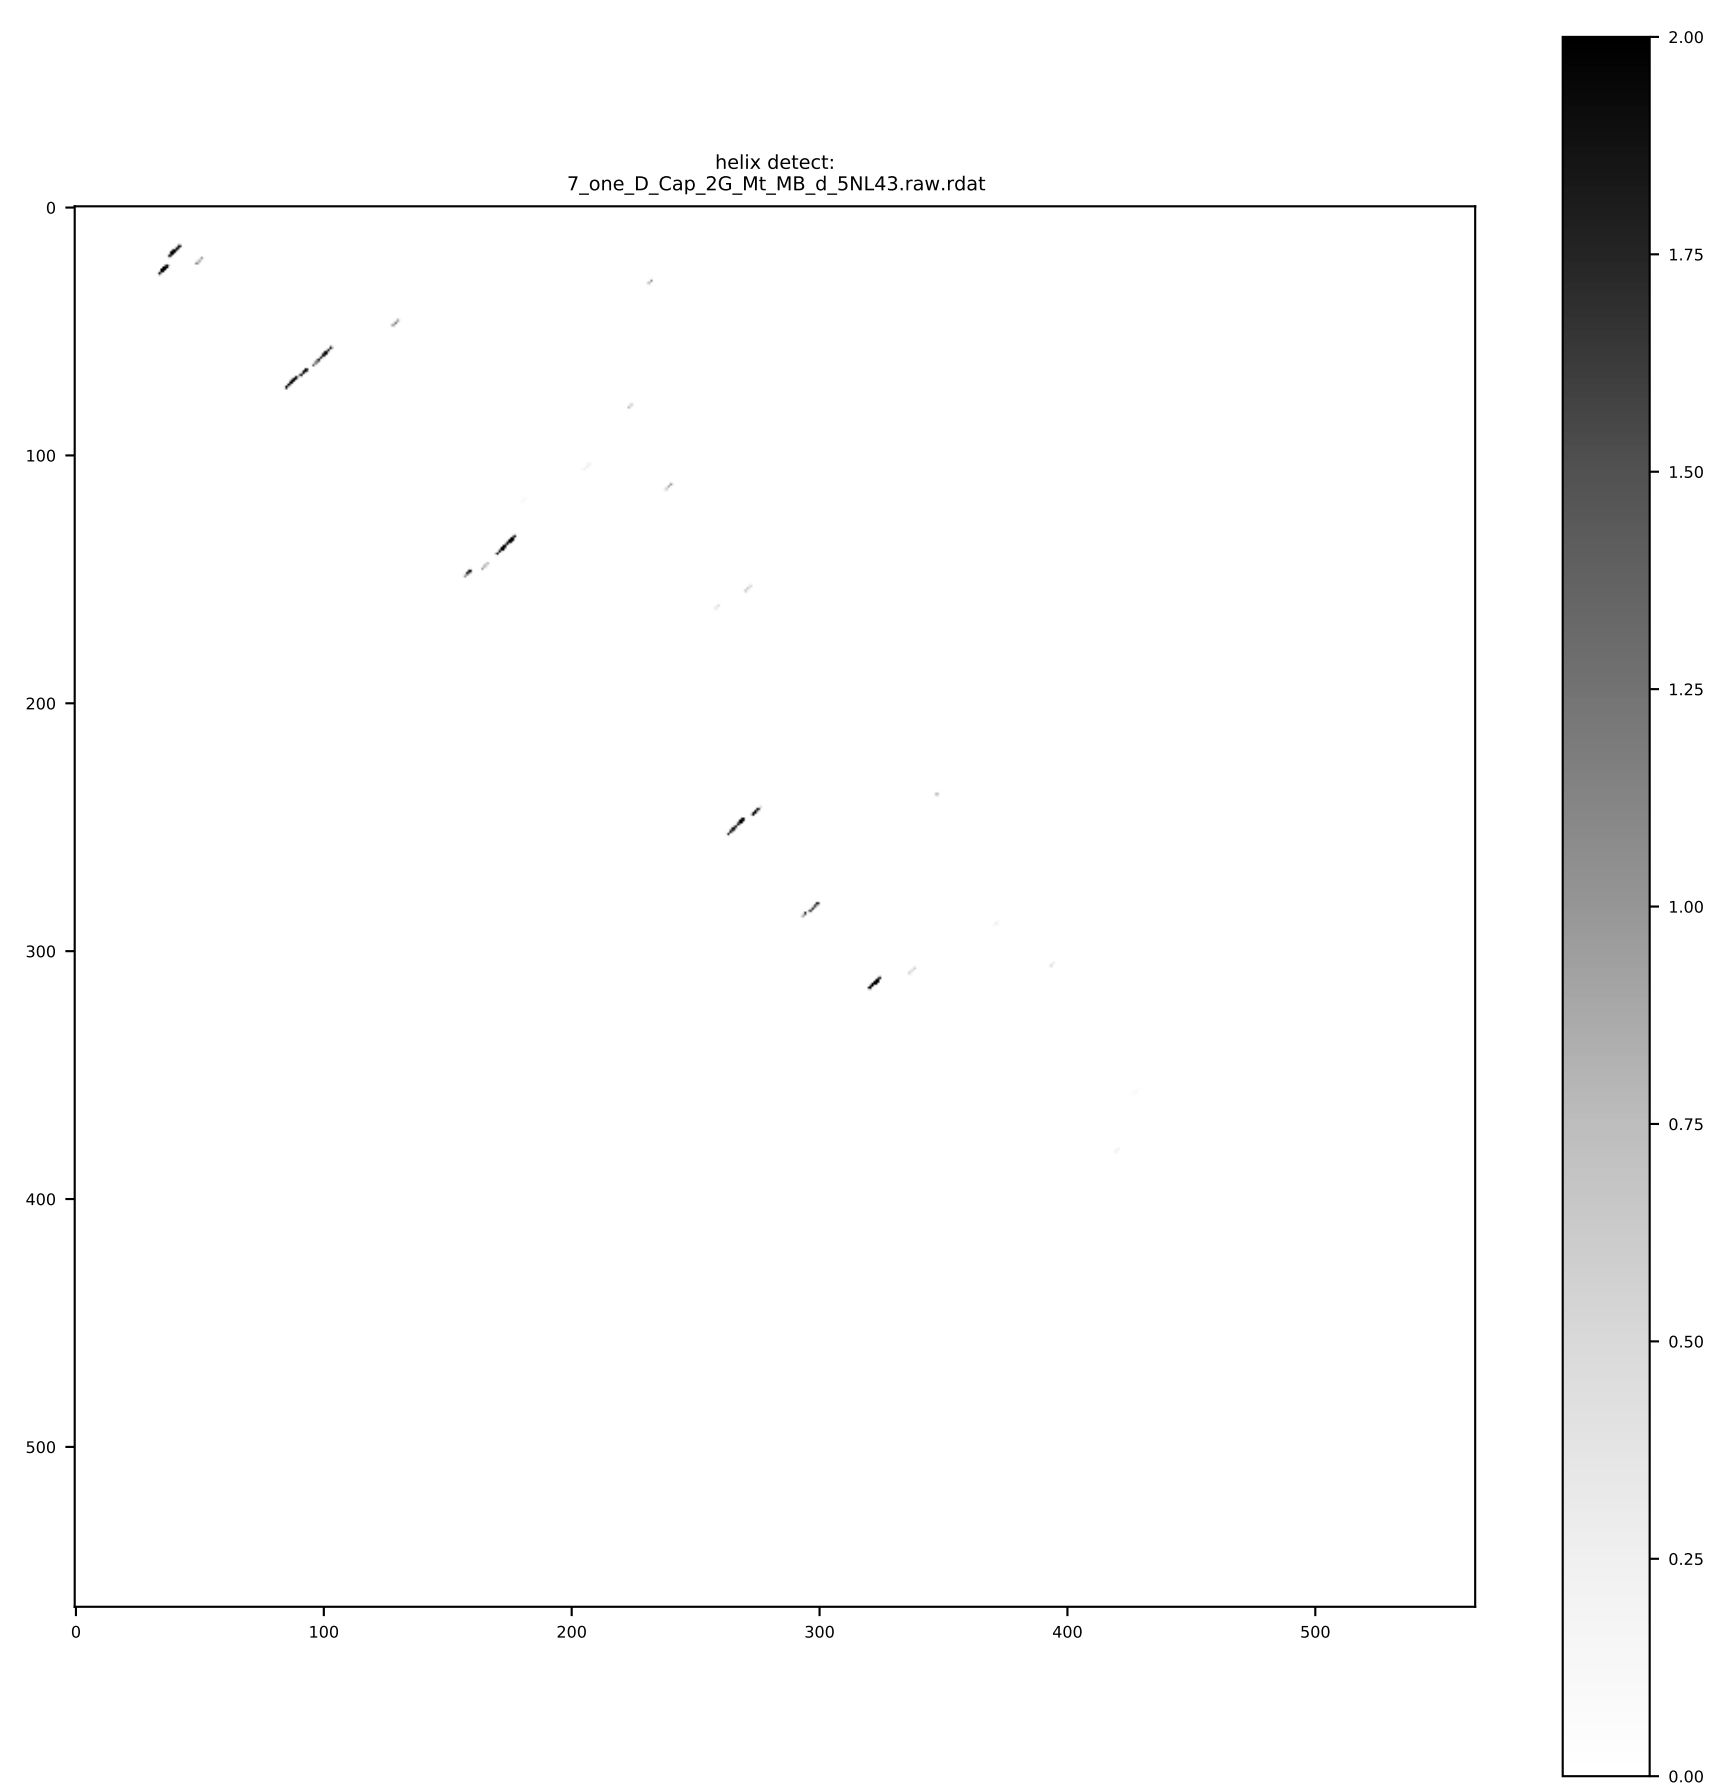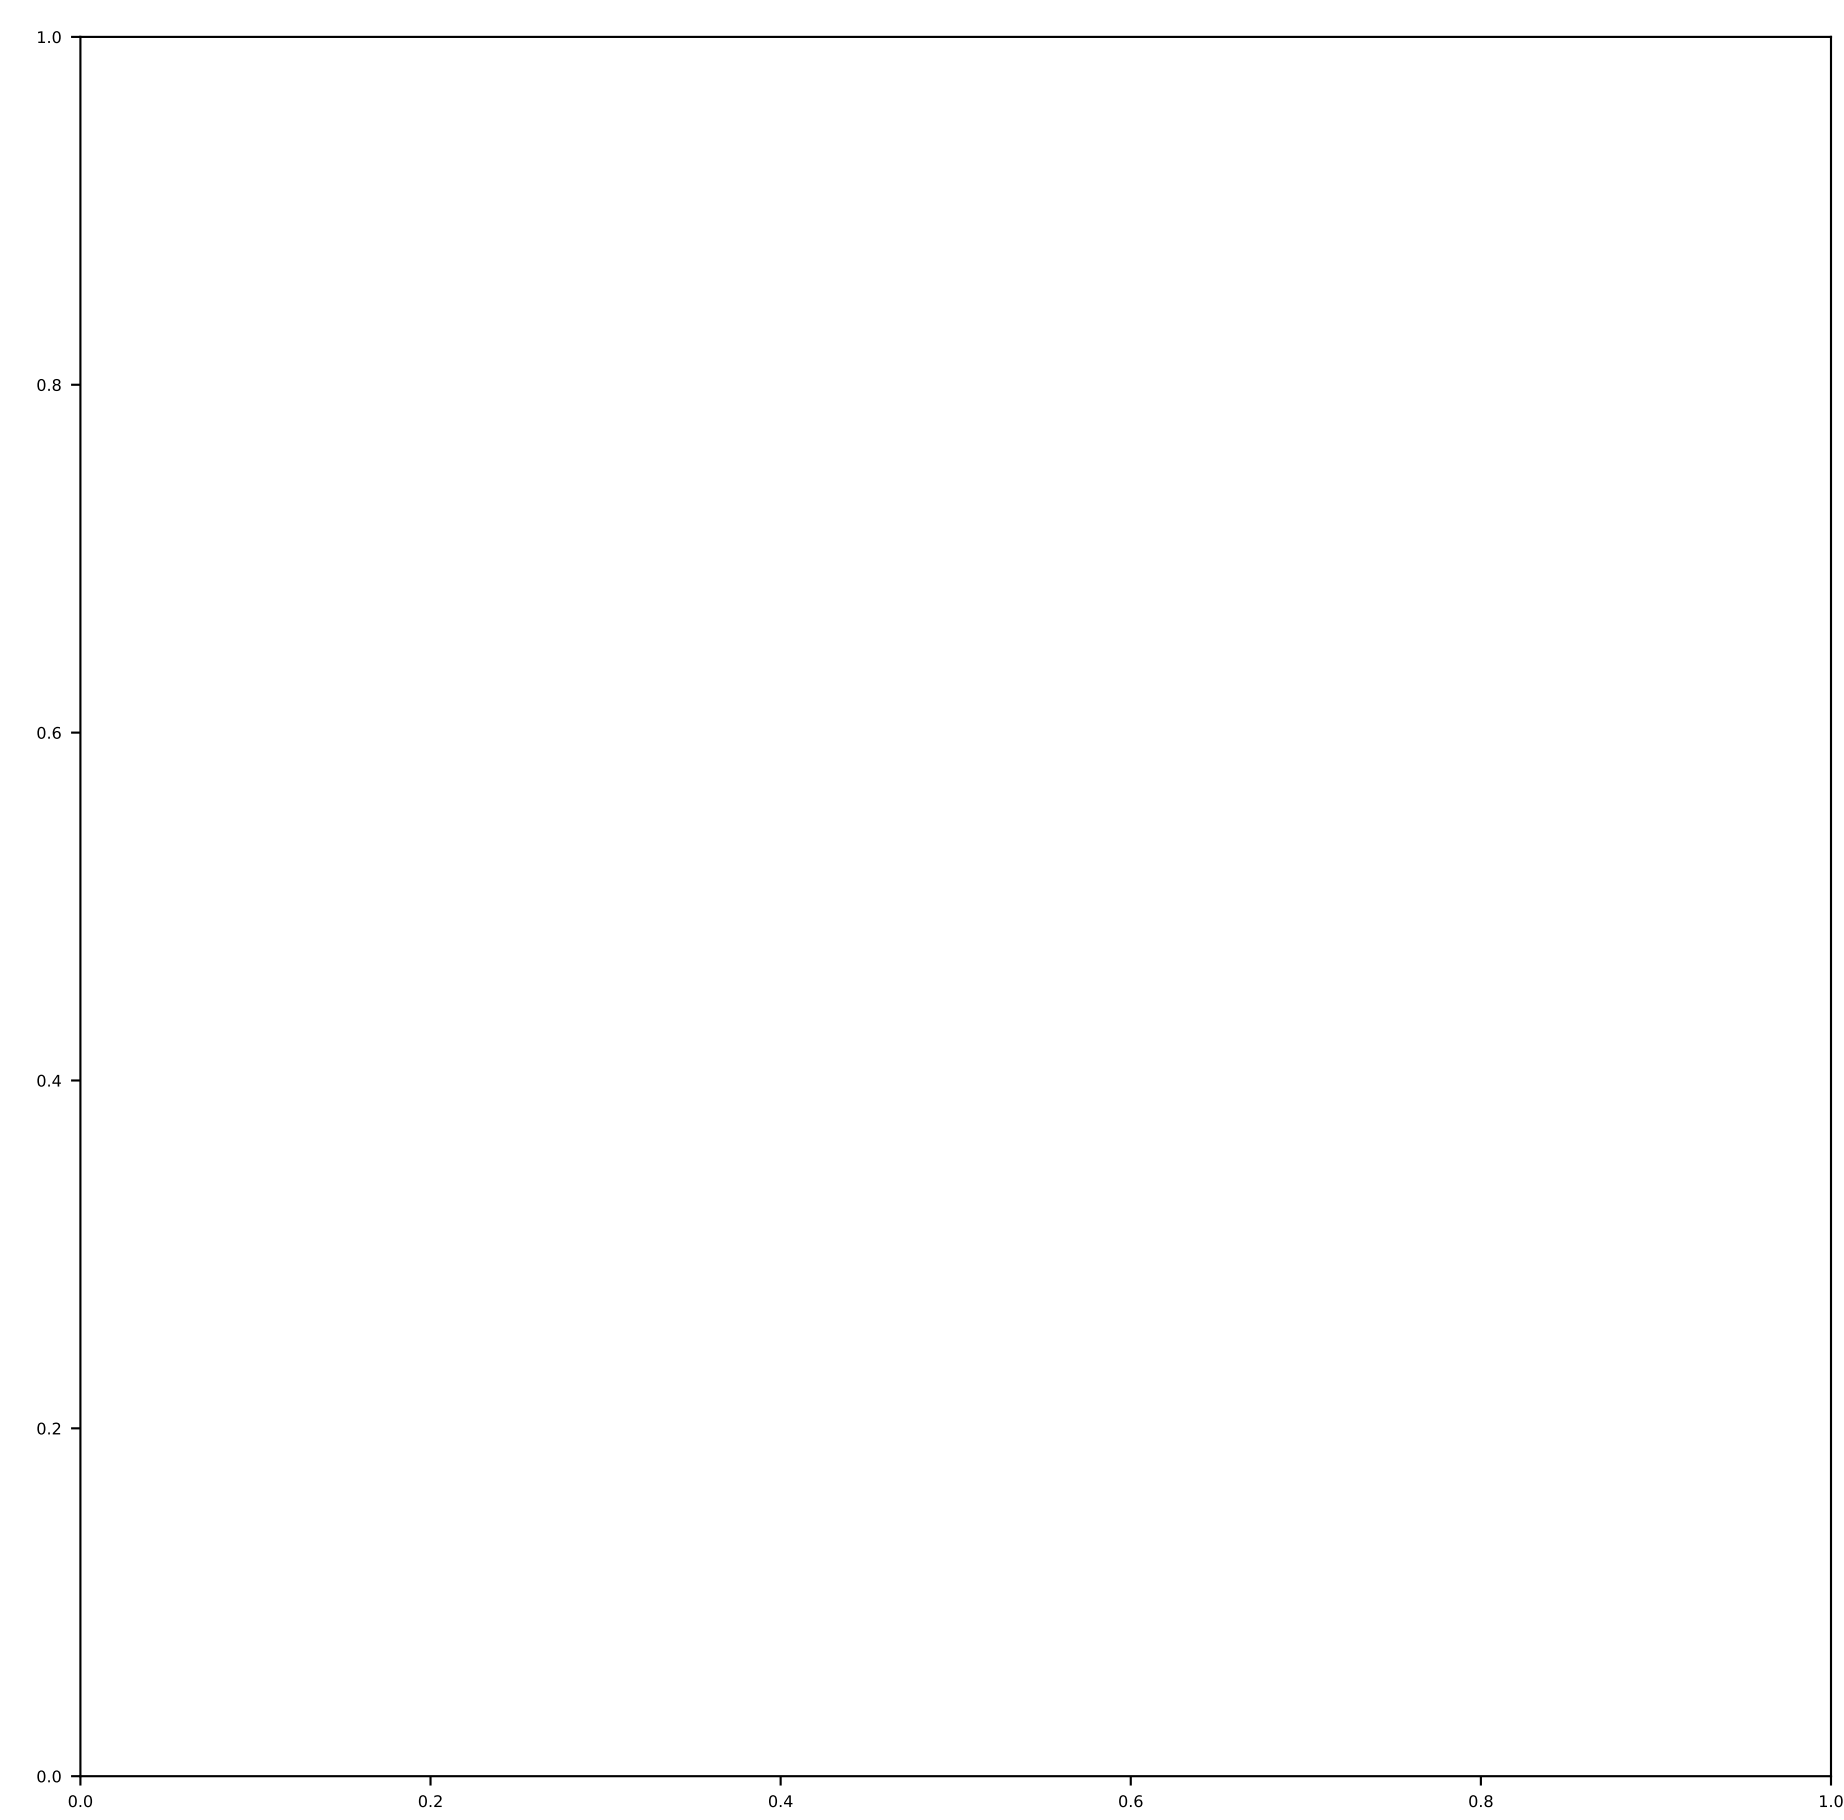

Supplement: Supplementary file 11 [file one_two_G_dimer_best_helix.pdf › 2d-structure-inference/best_helix/one_two_G_dimer_best_helix.pdf]

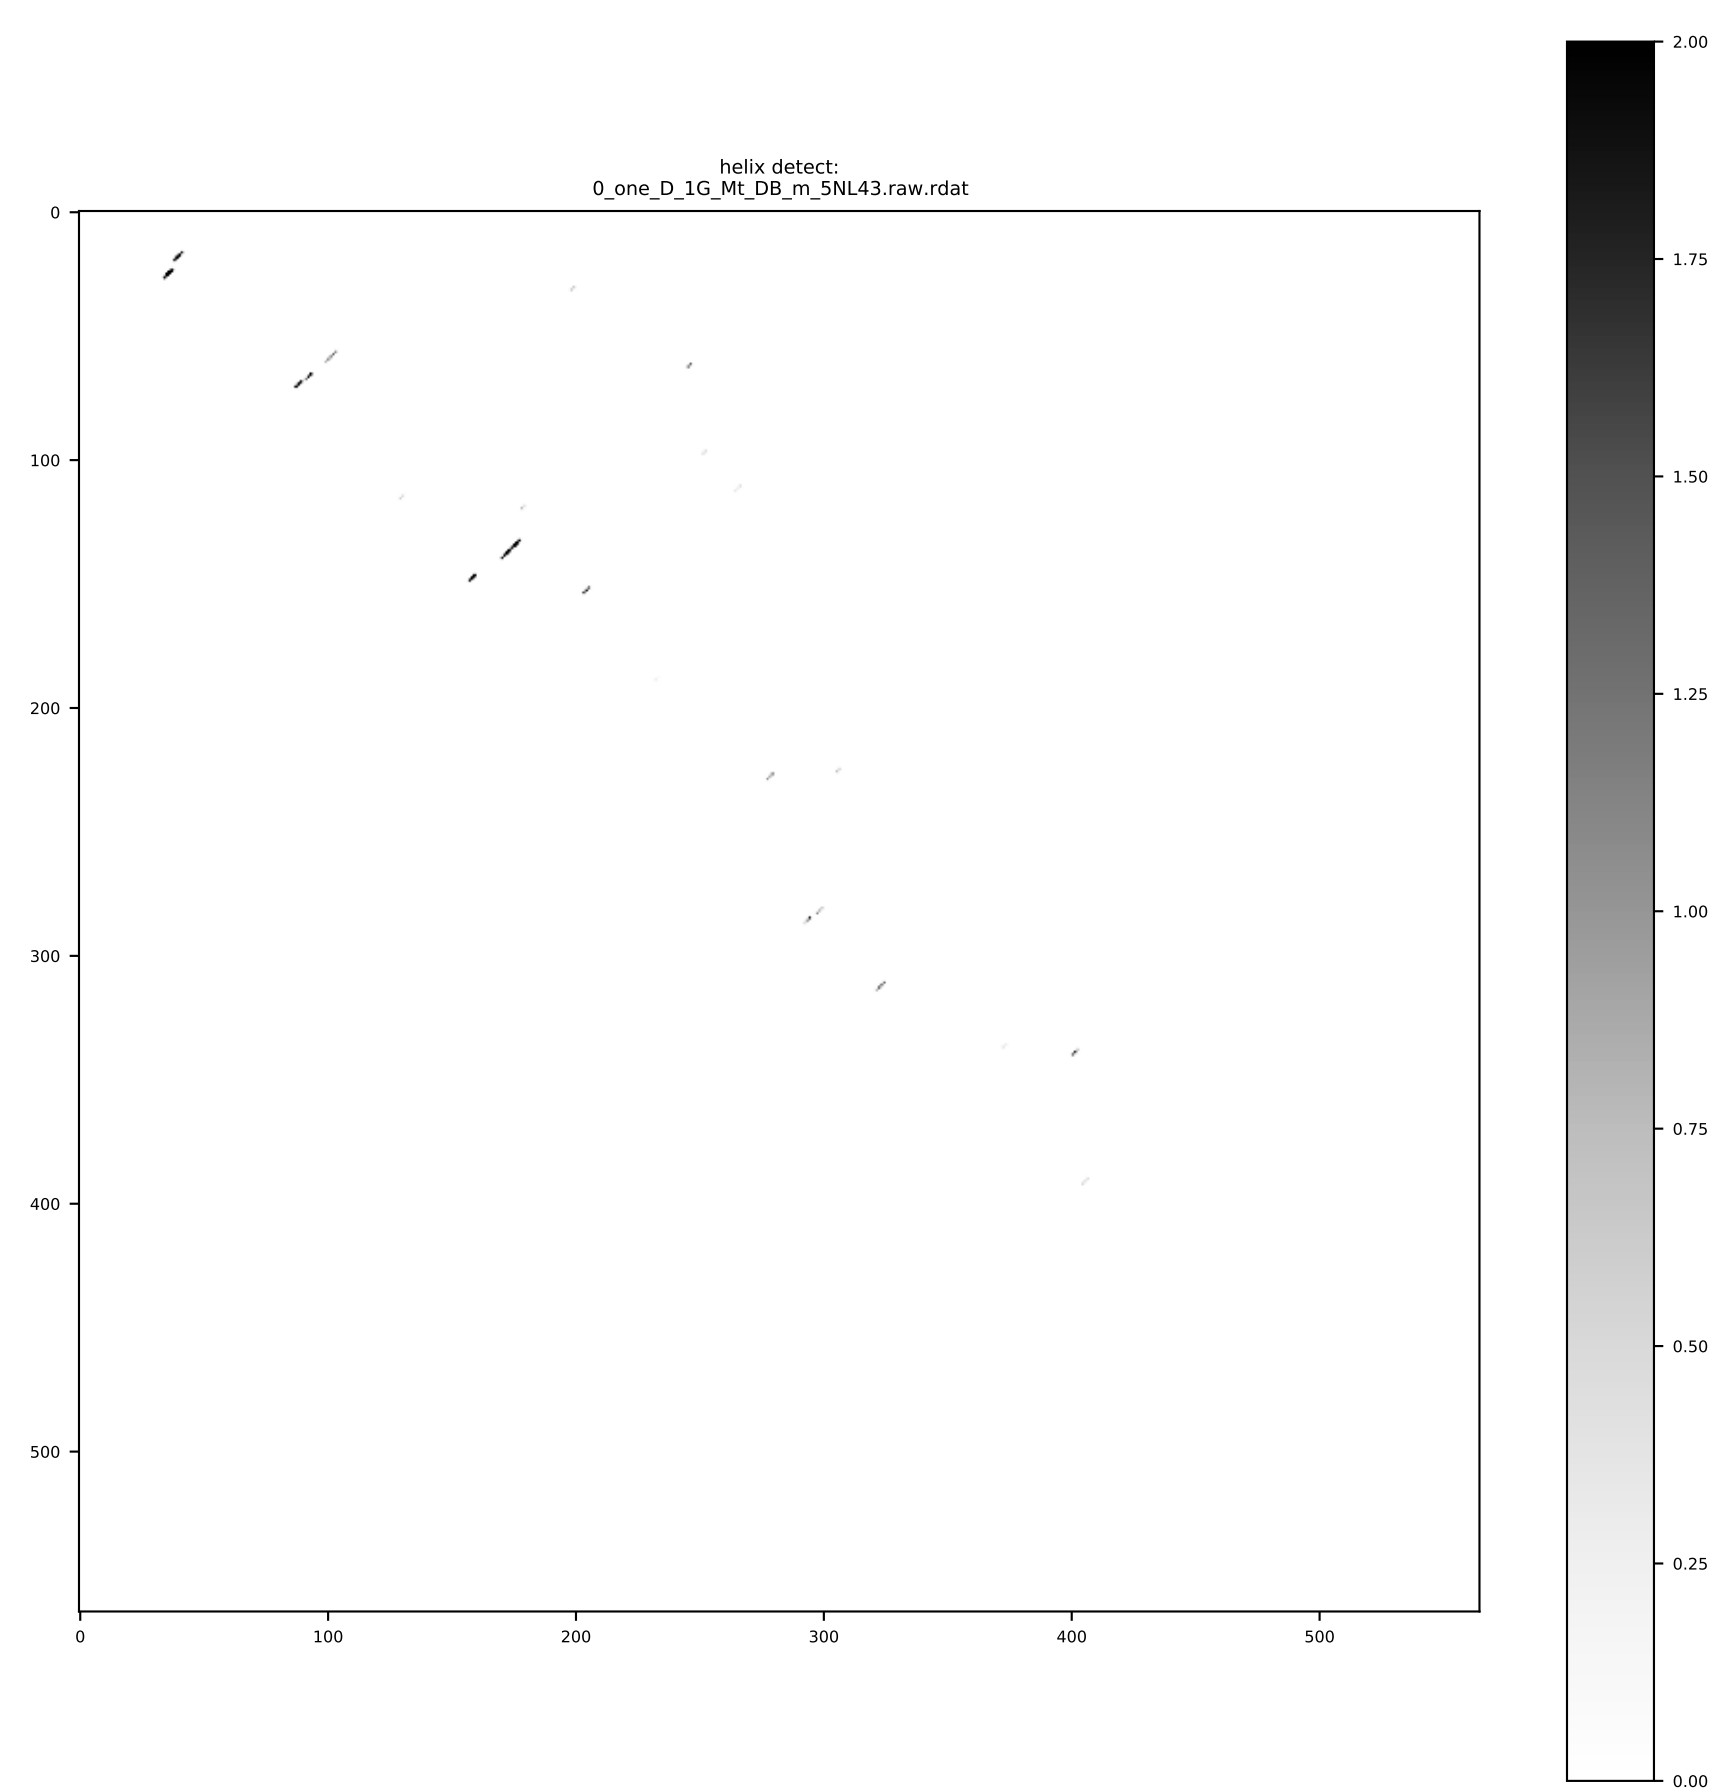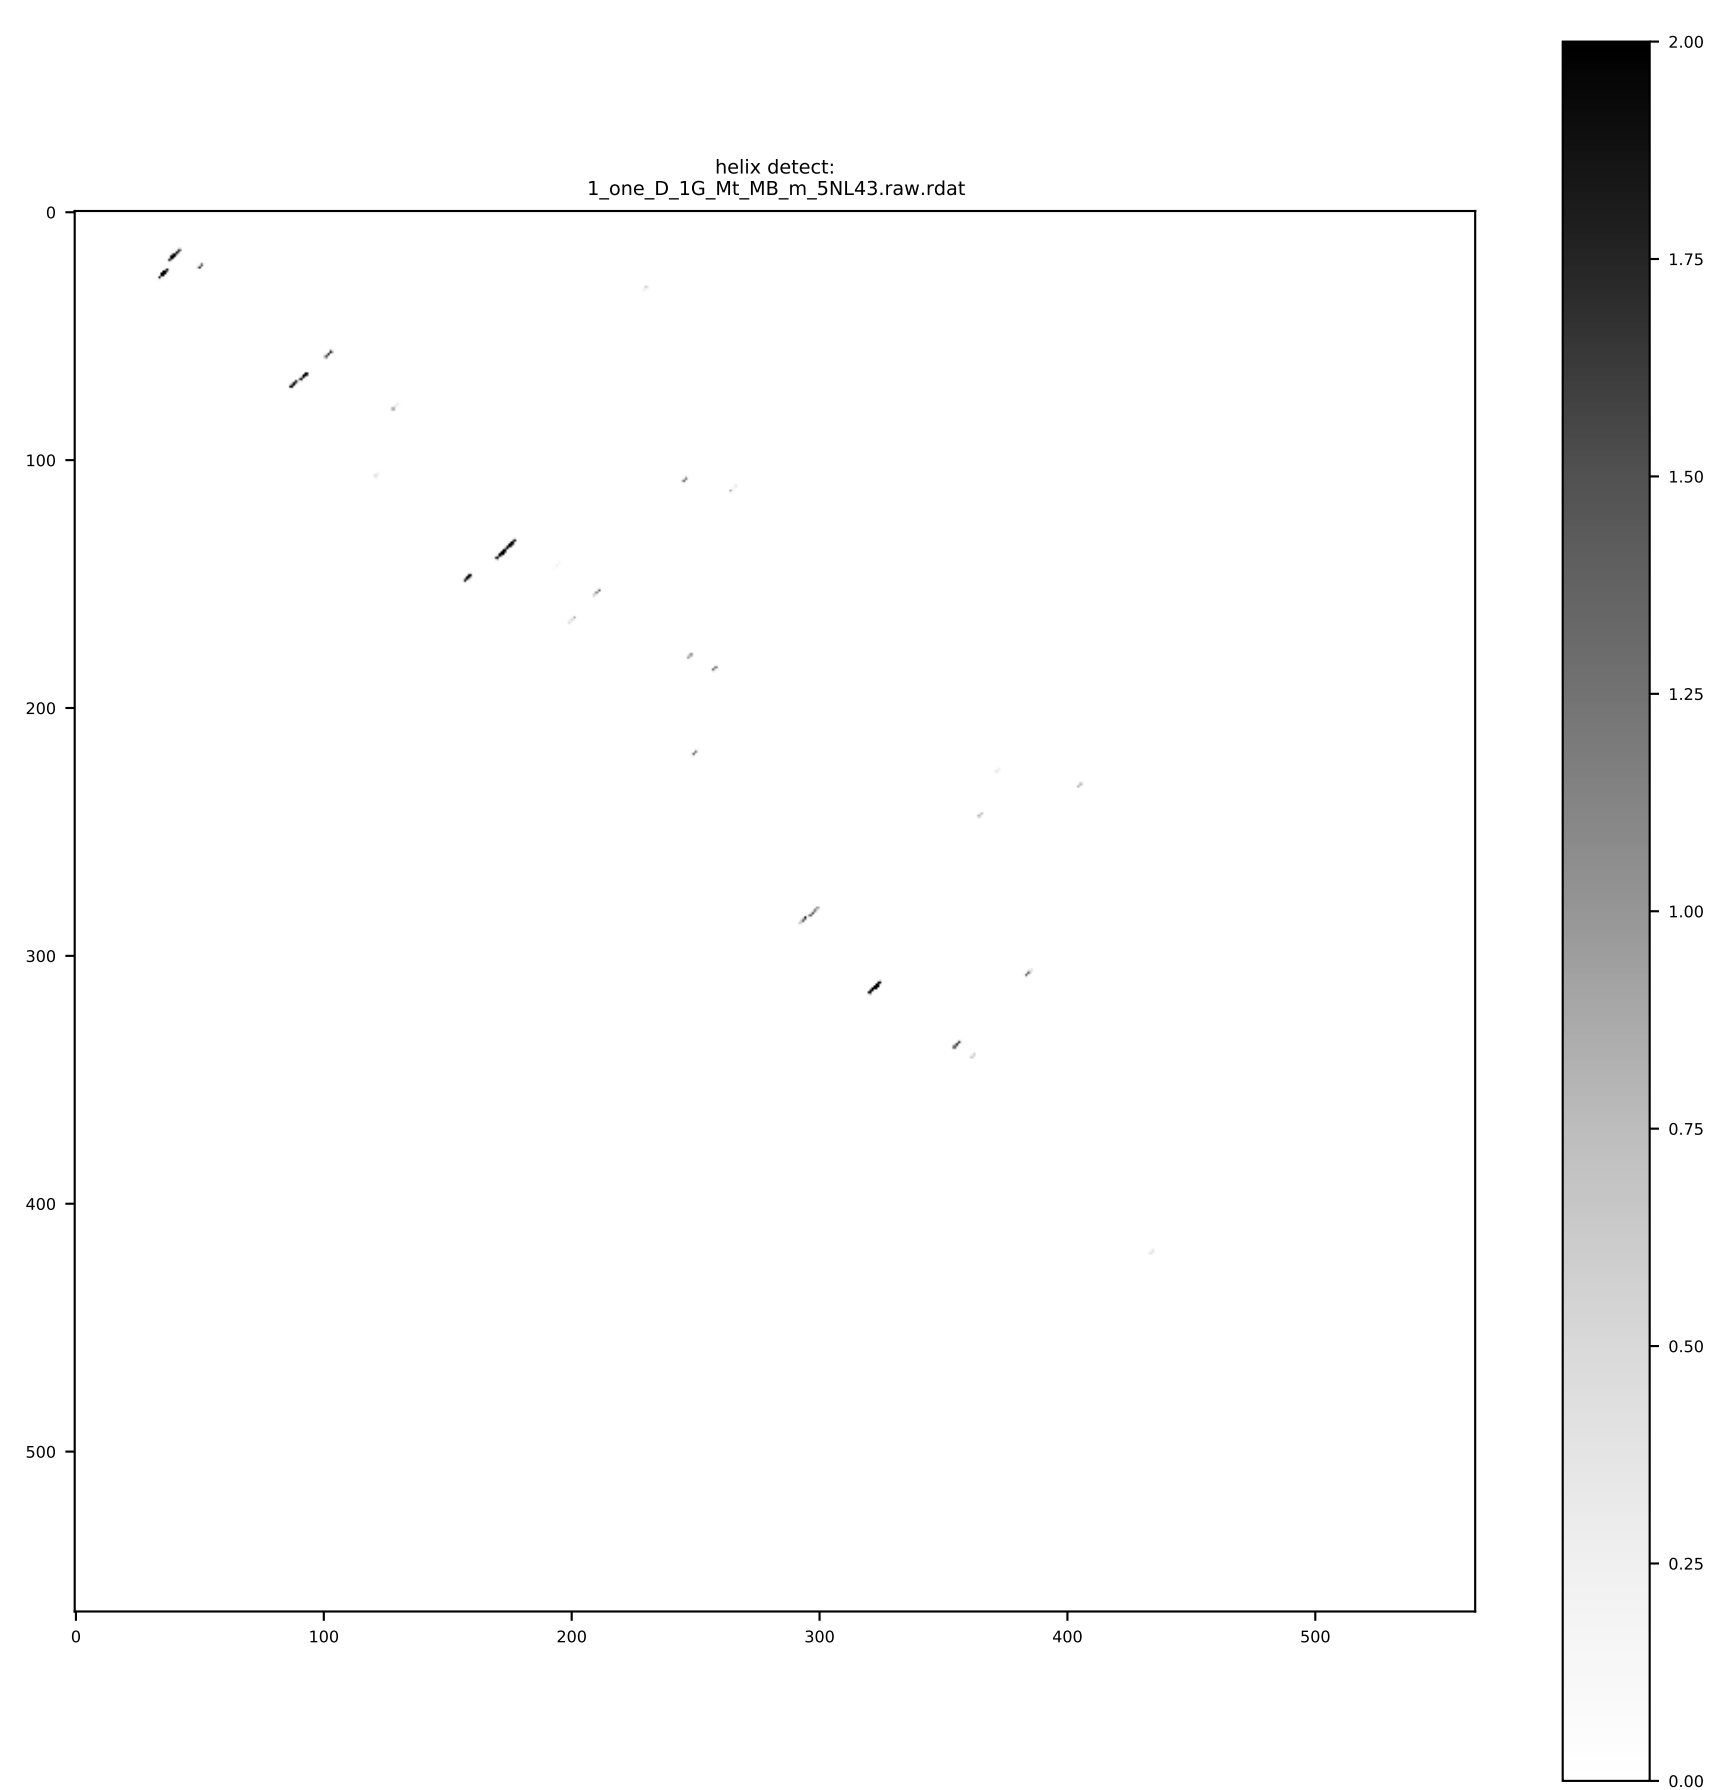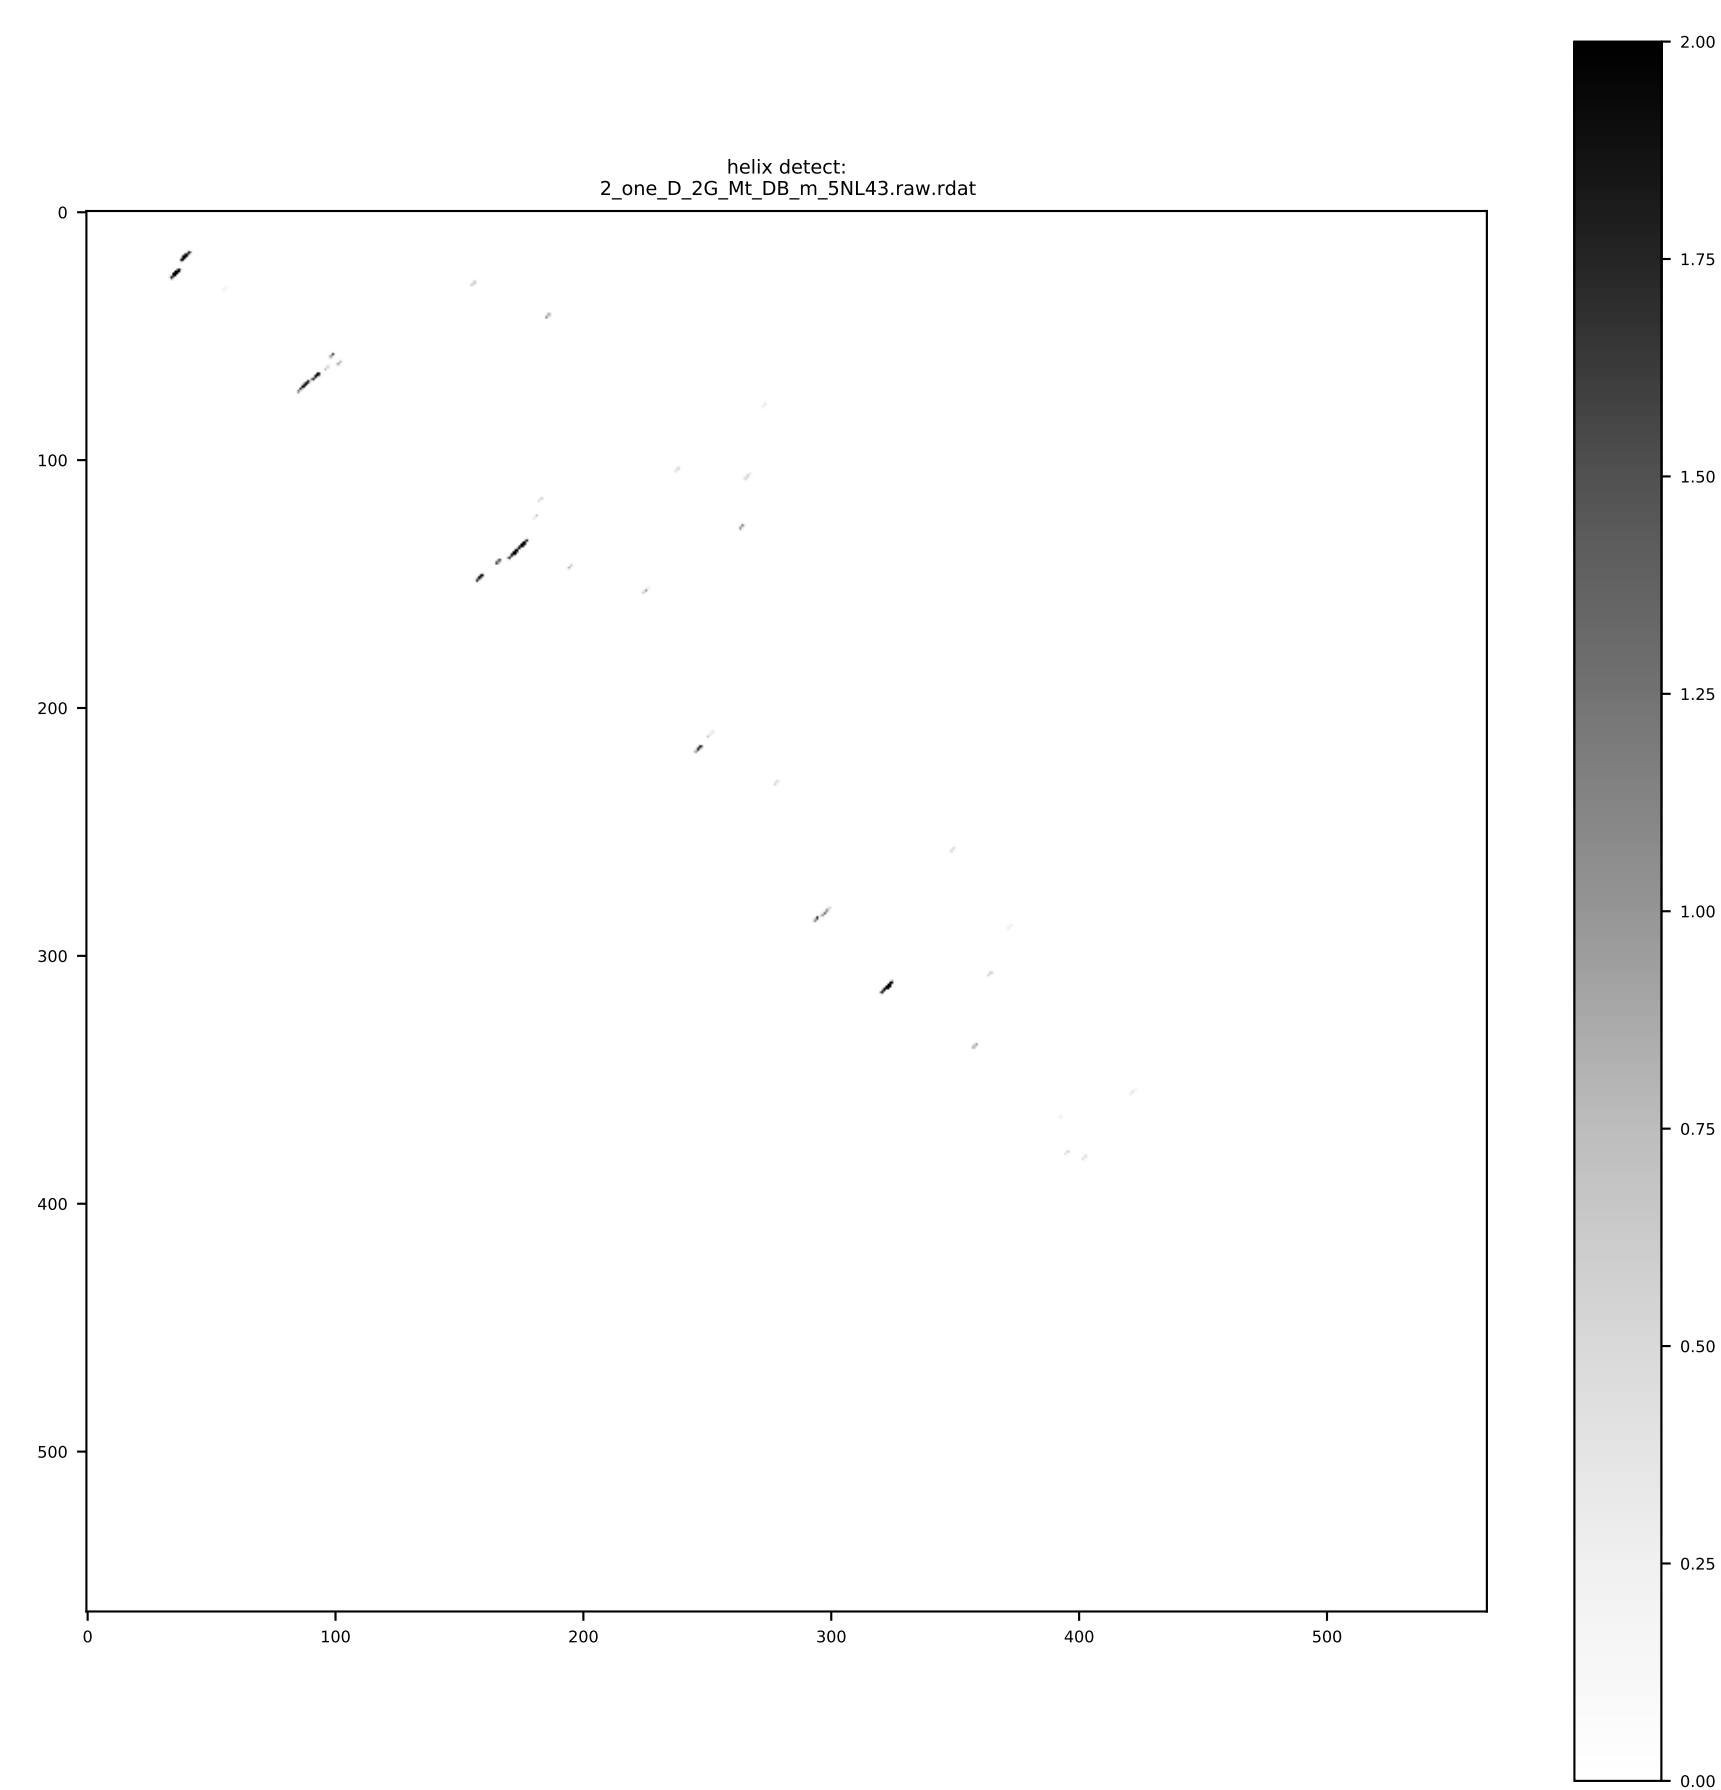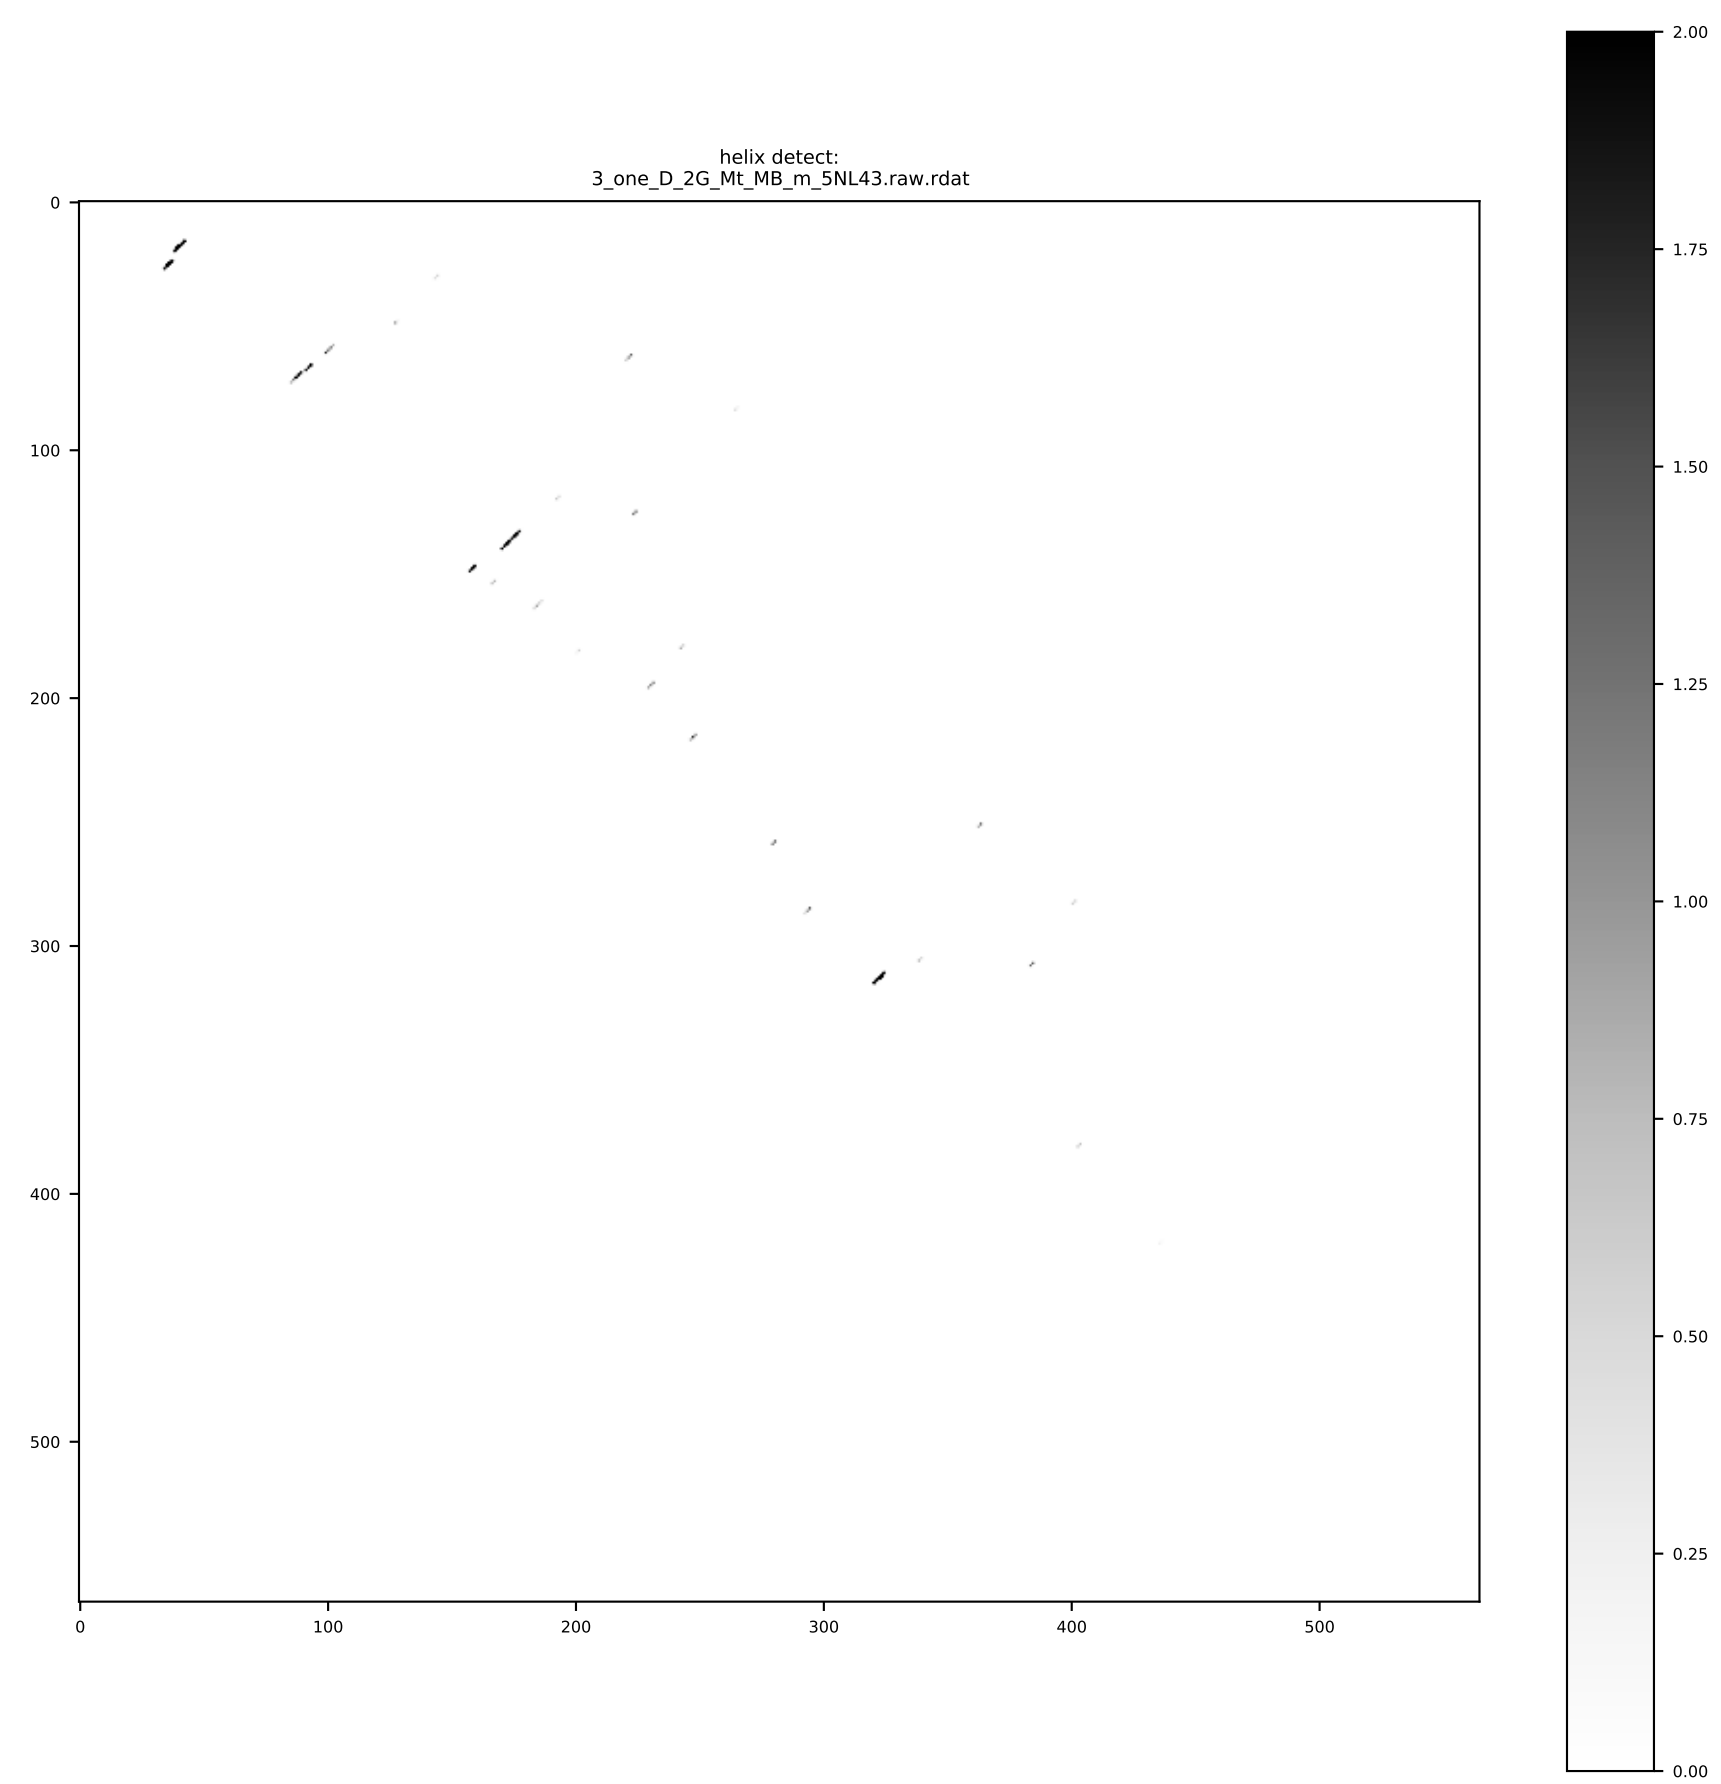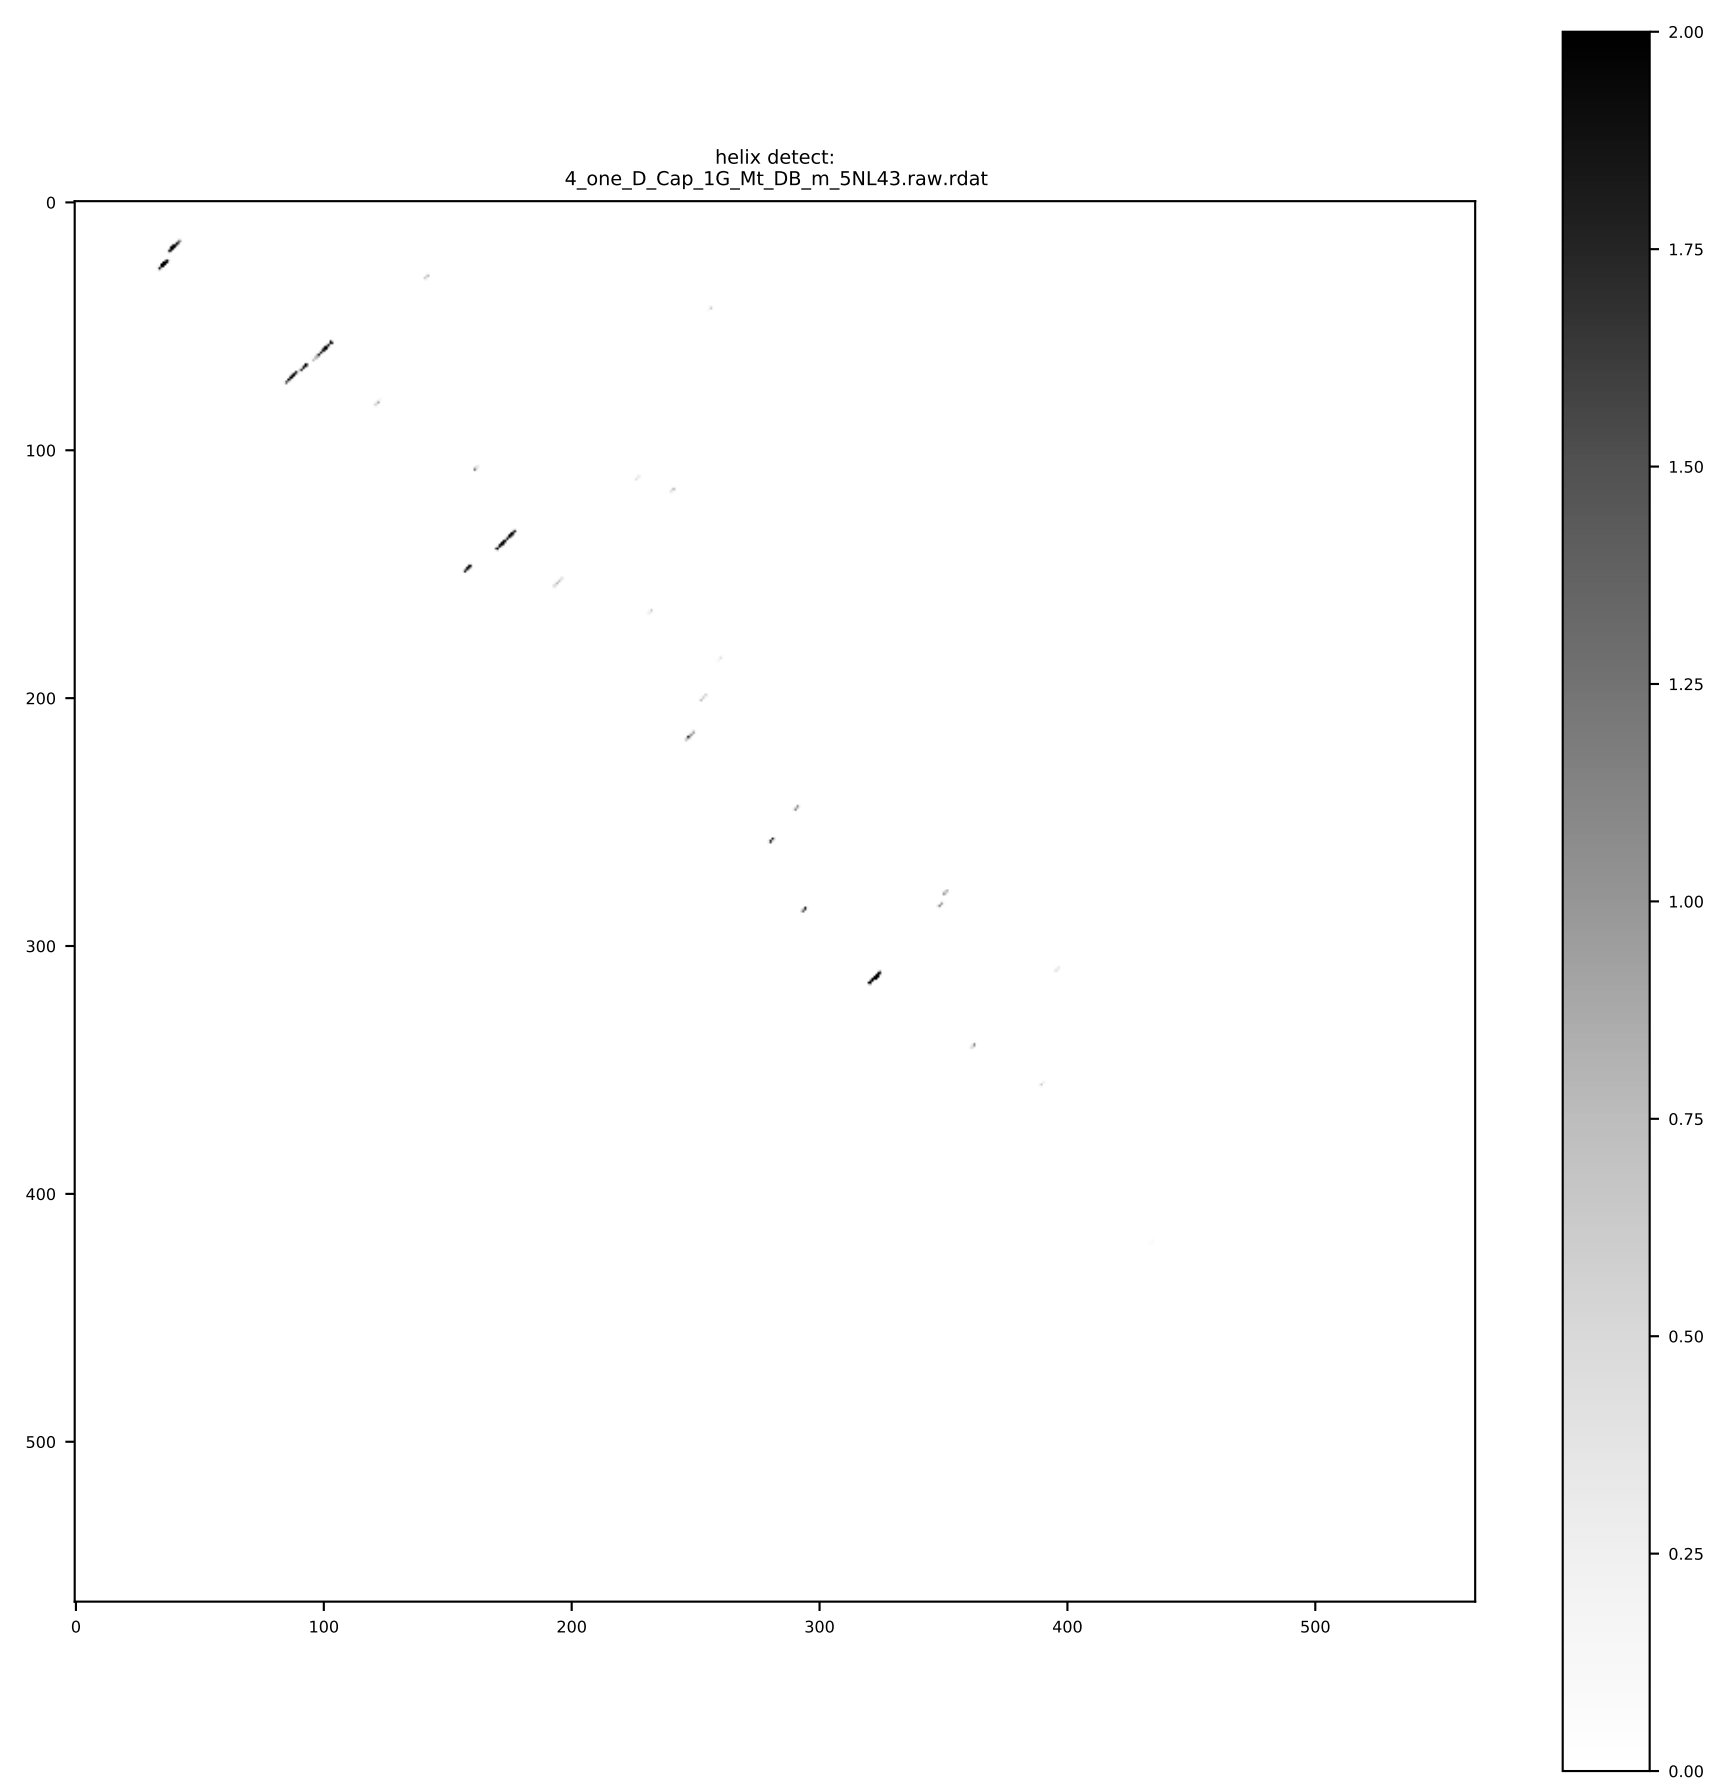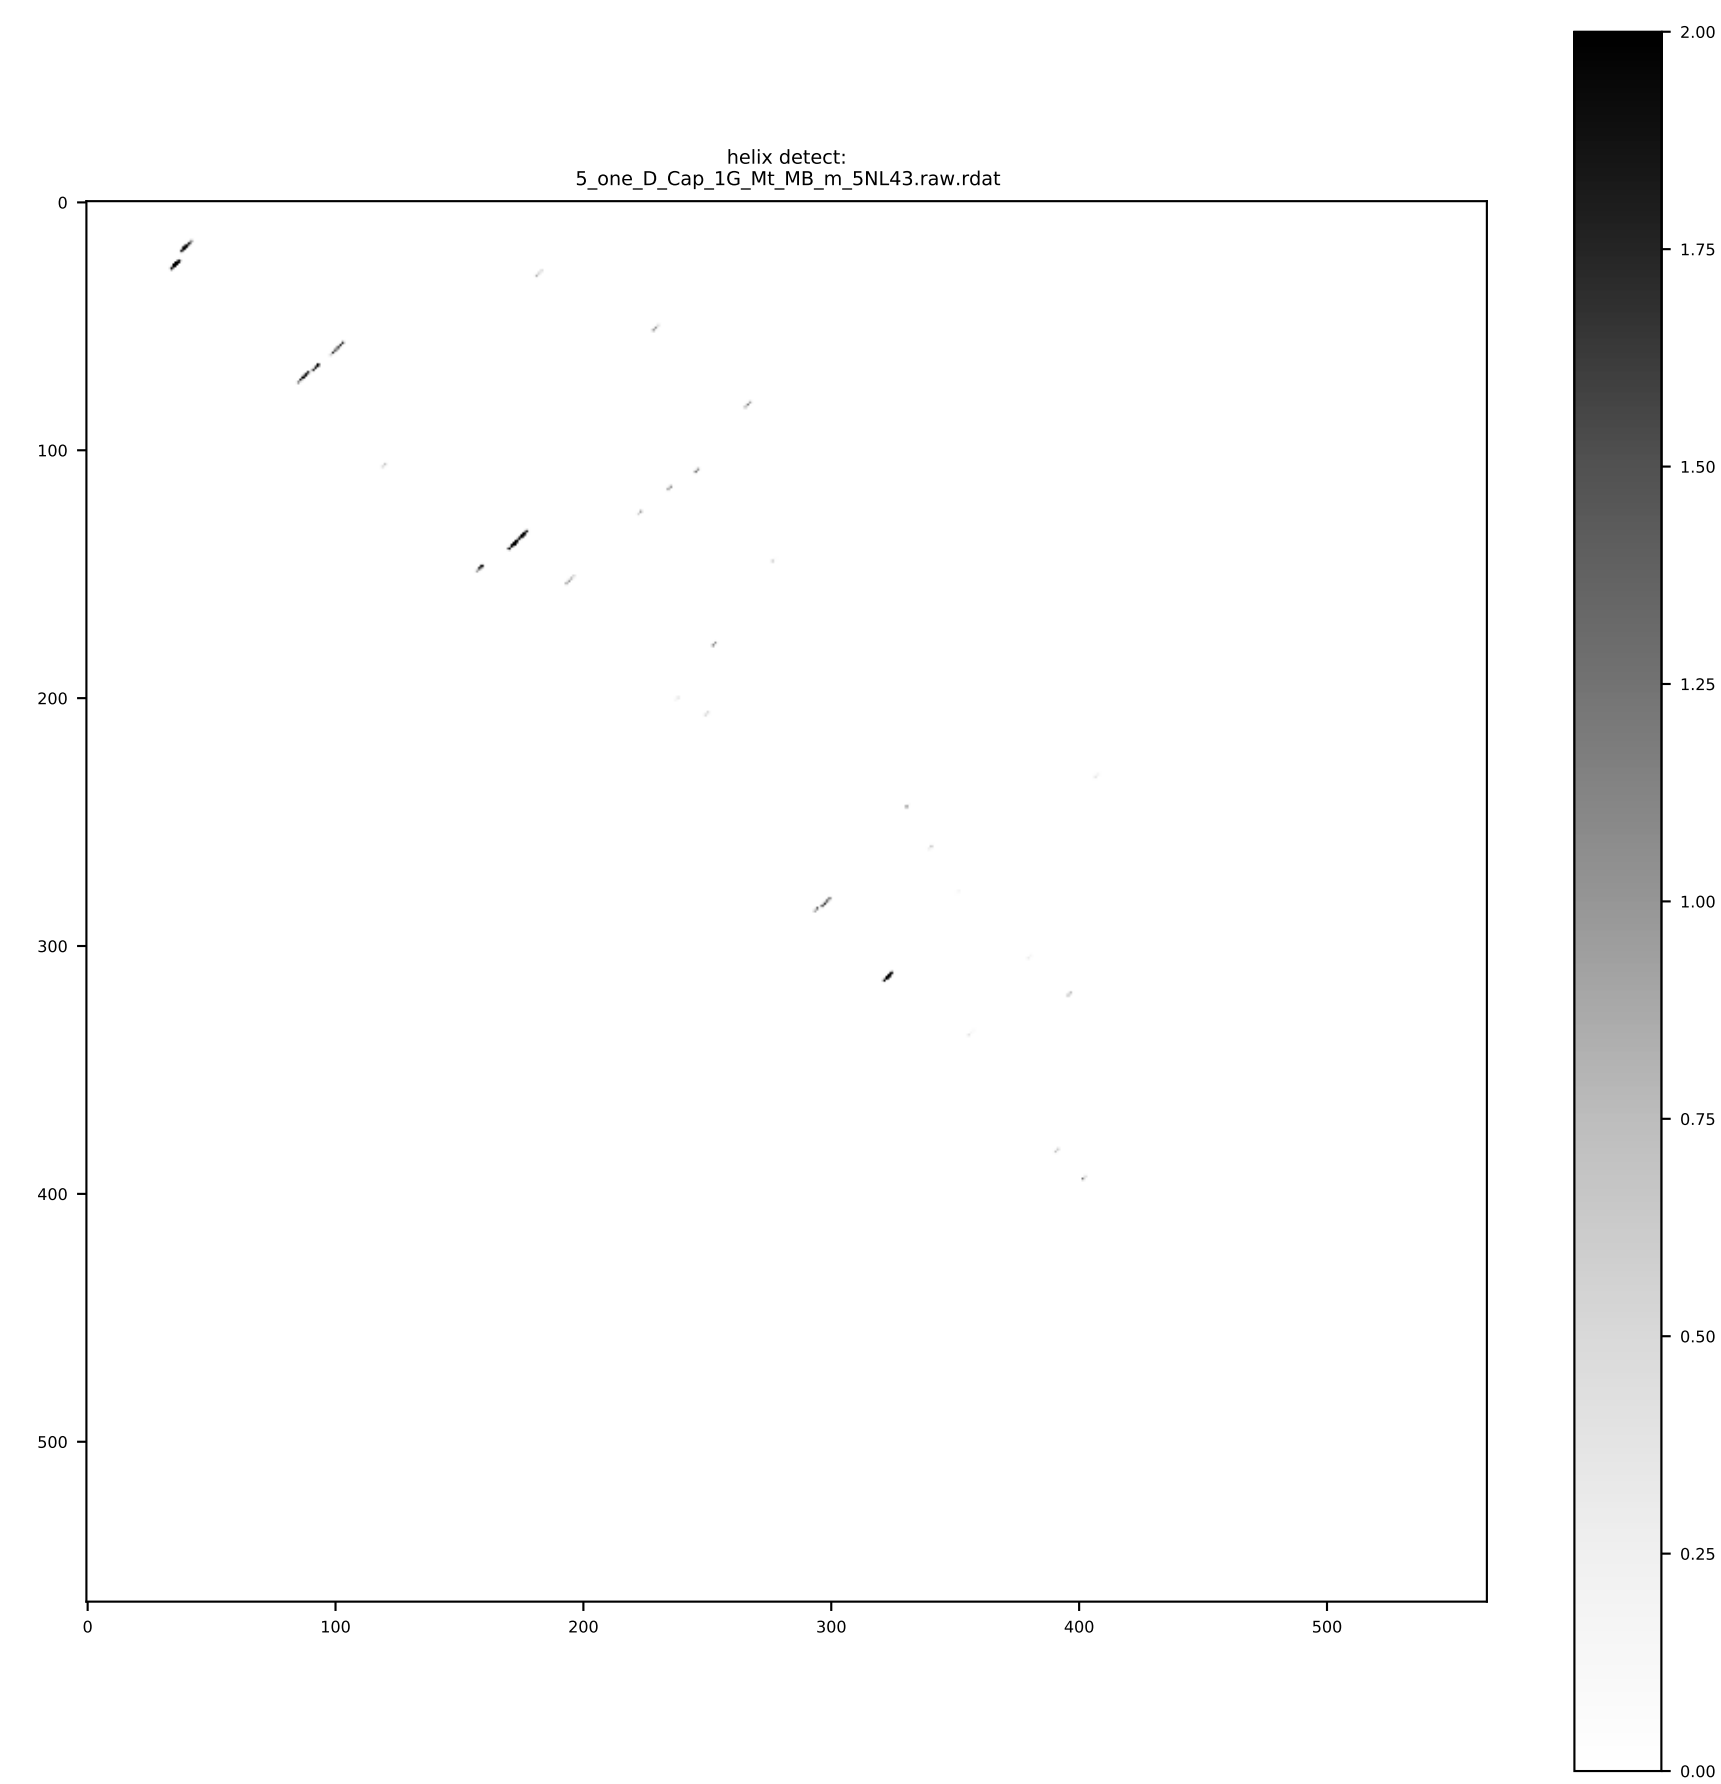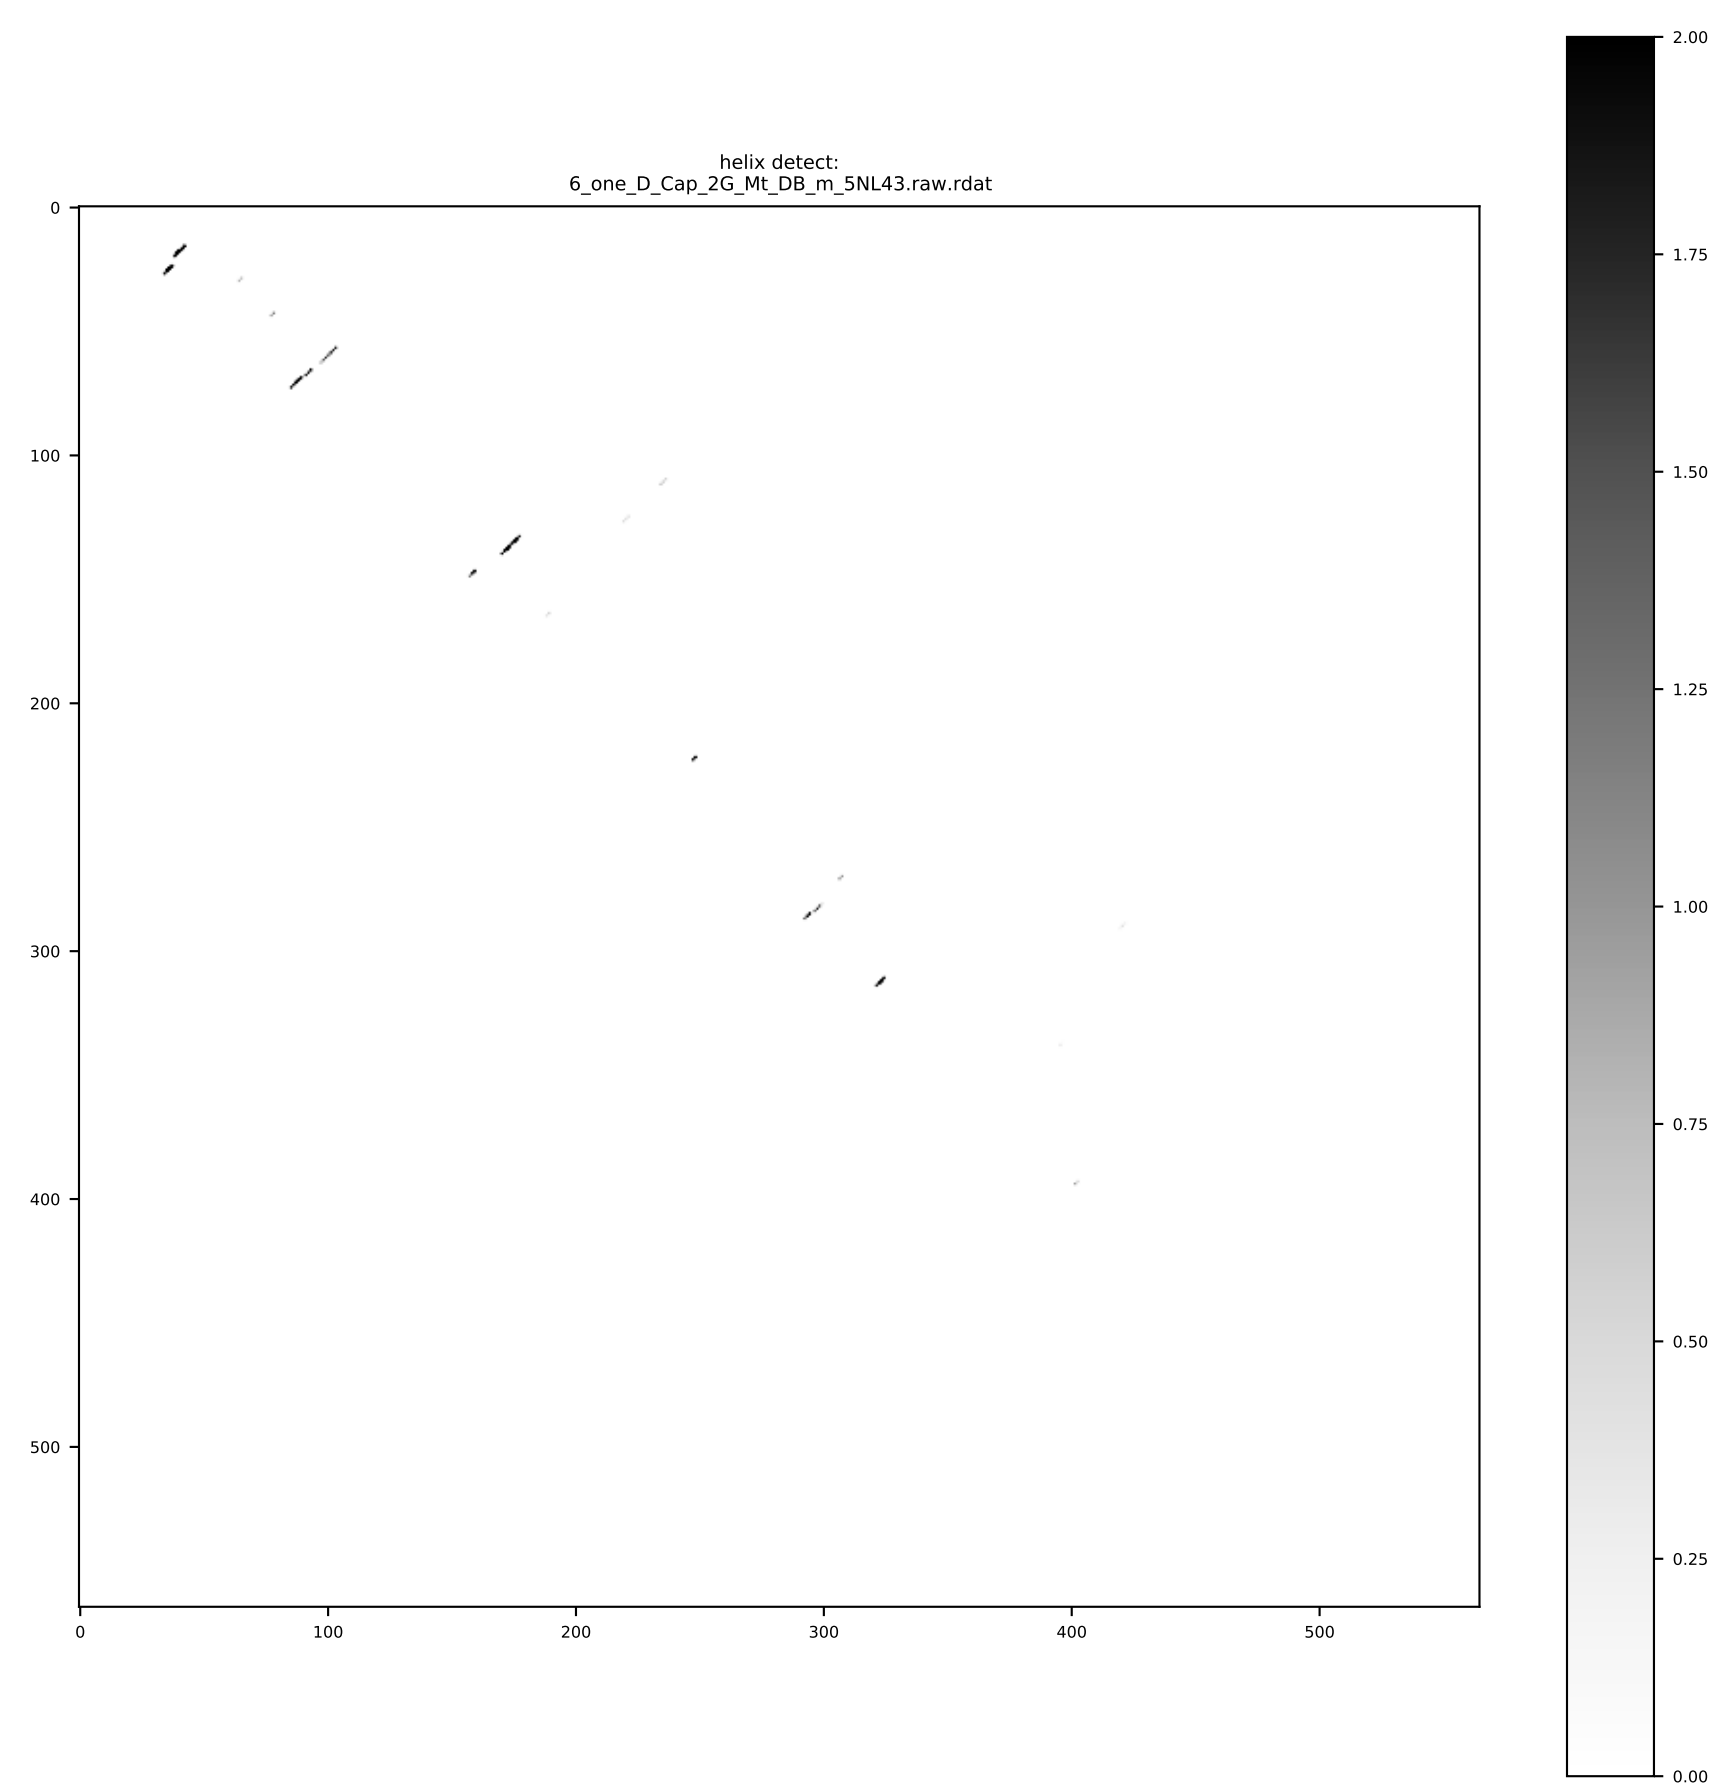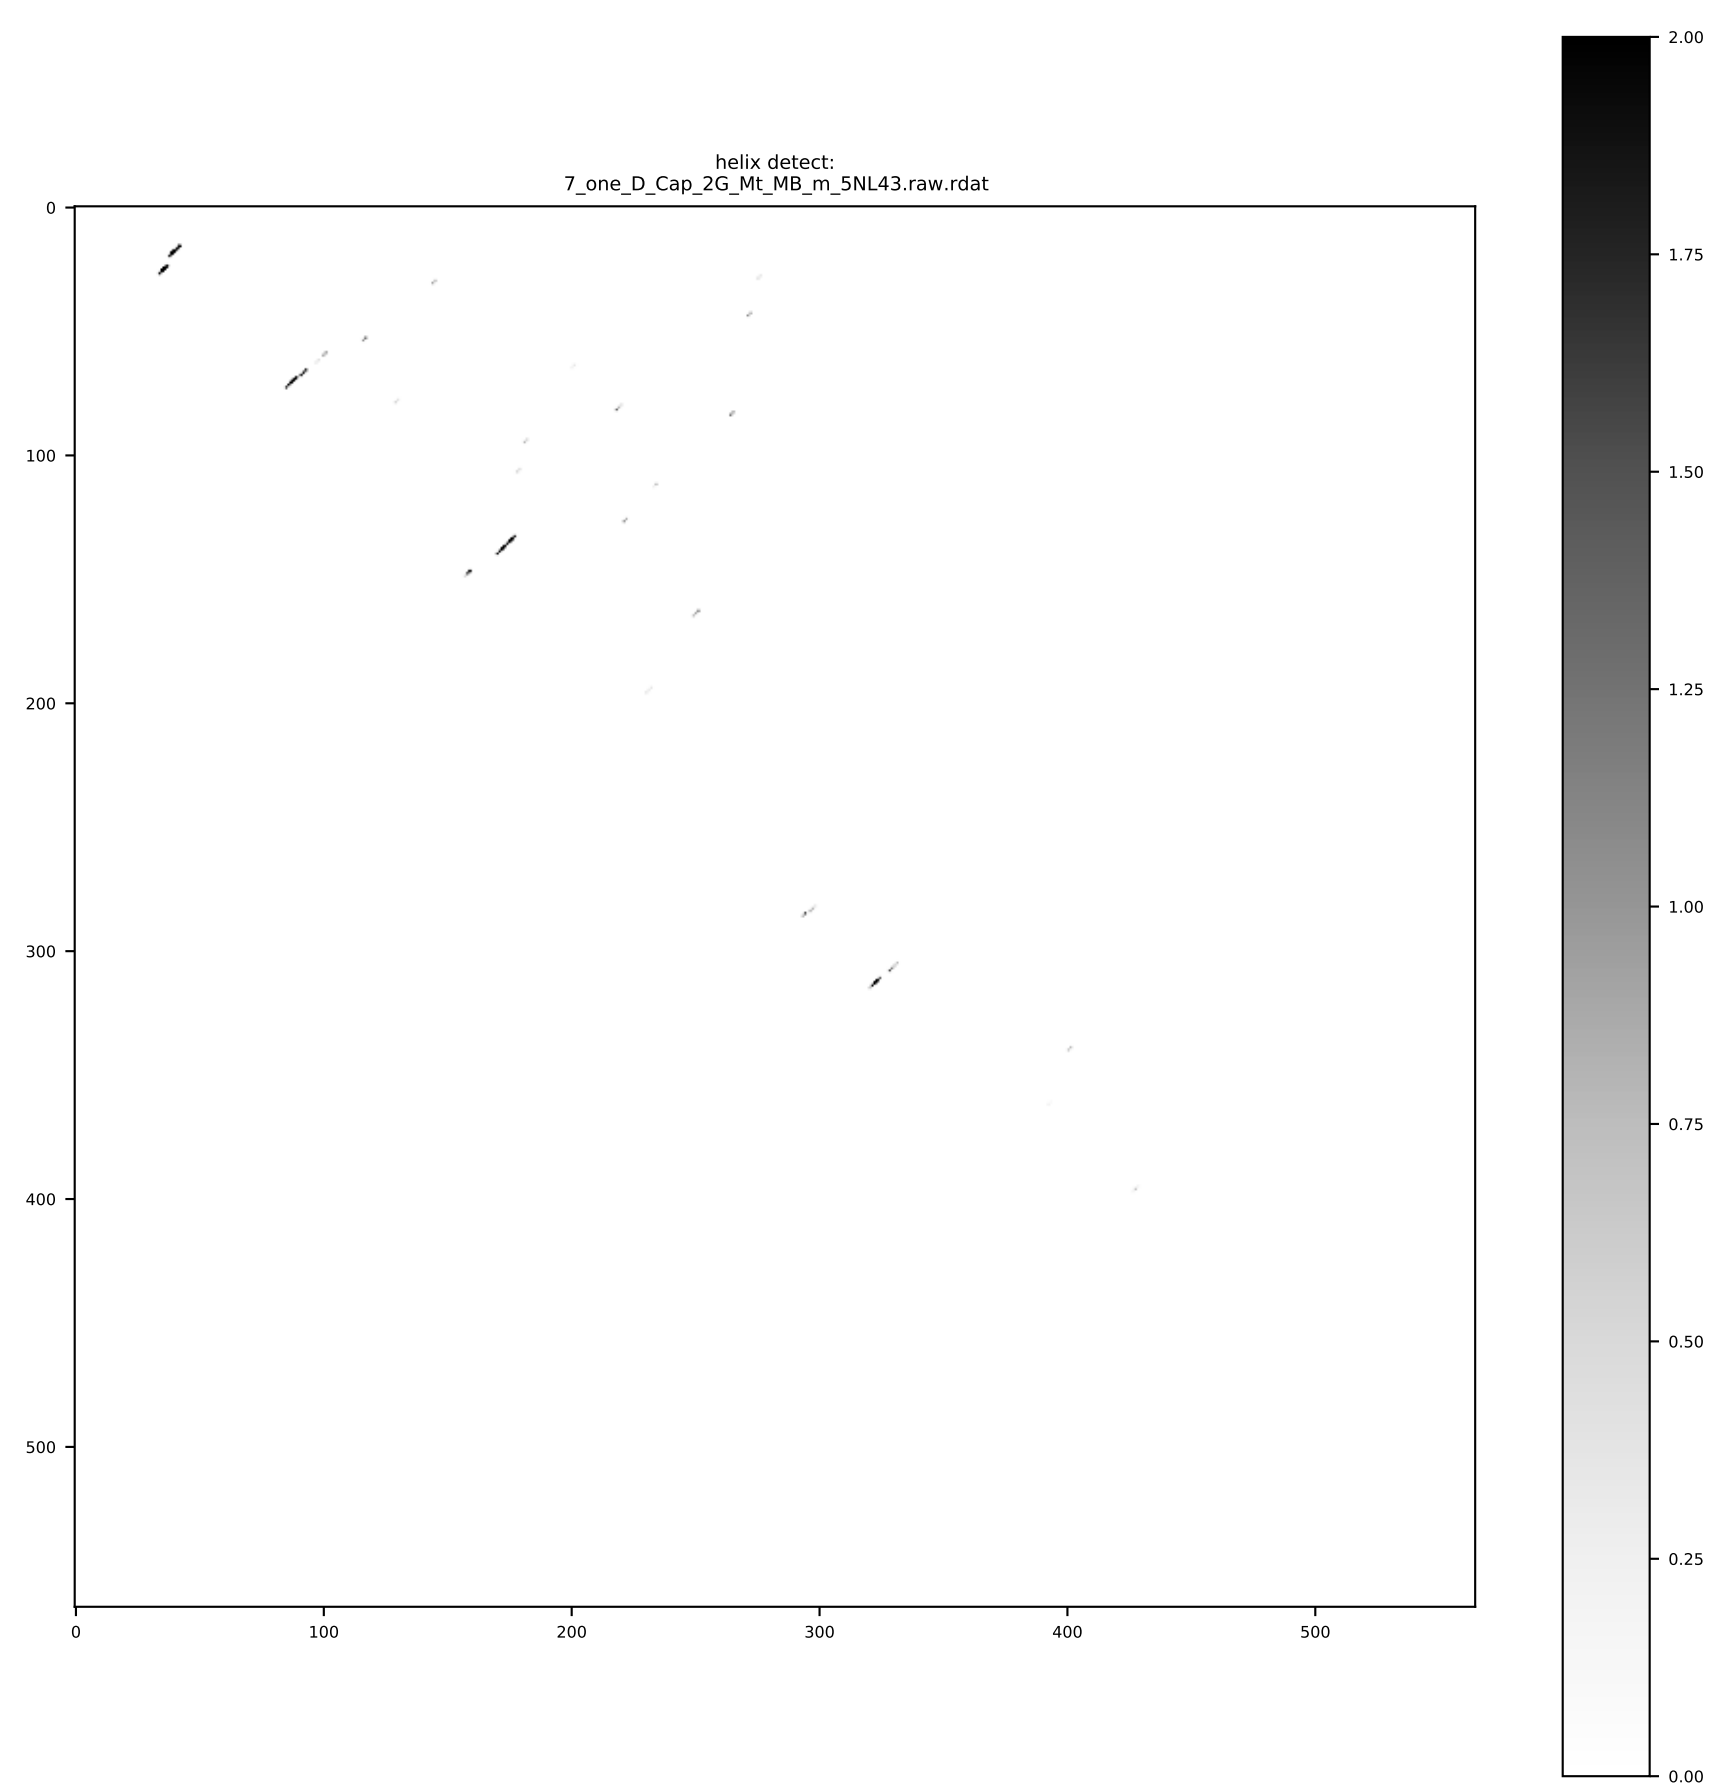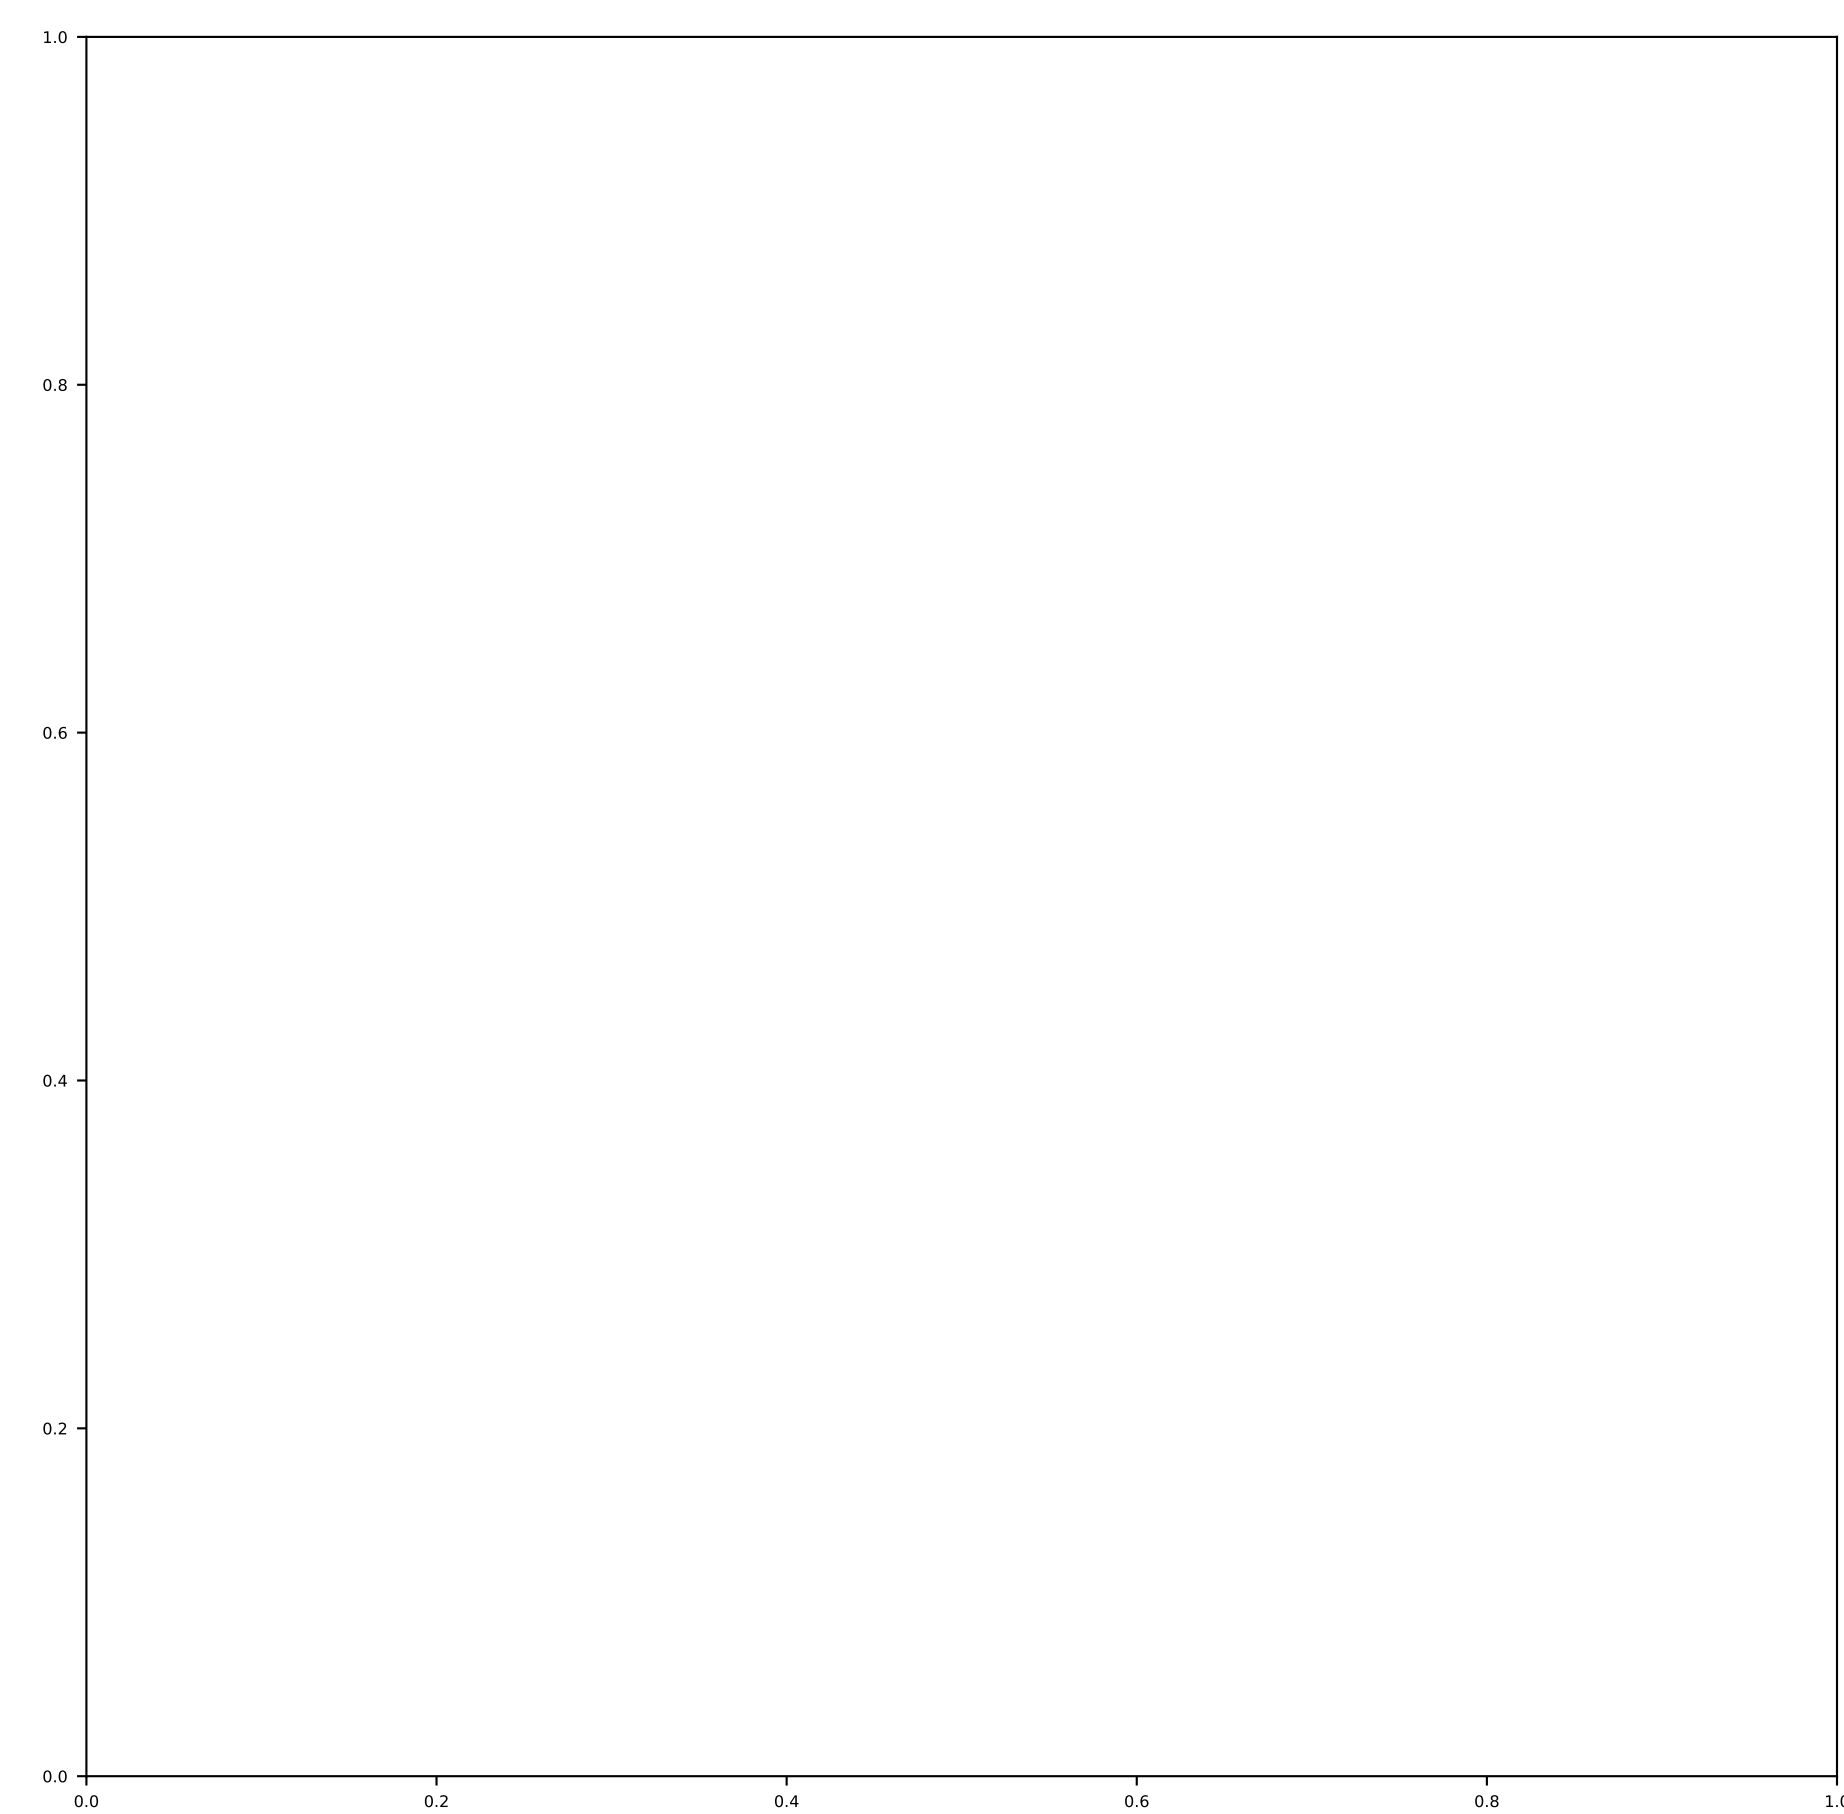

Supplement: Supplementary file 12 [file one_two_G_monomer_best_helix.pdf › 2d-structure-inference/best_helix/one_two_G_monomer_best_helix.pdf]

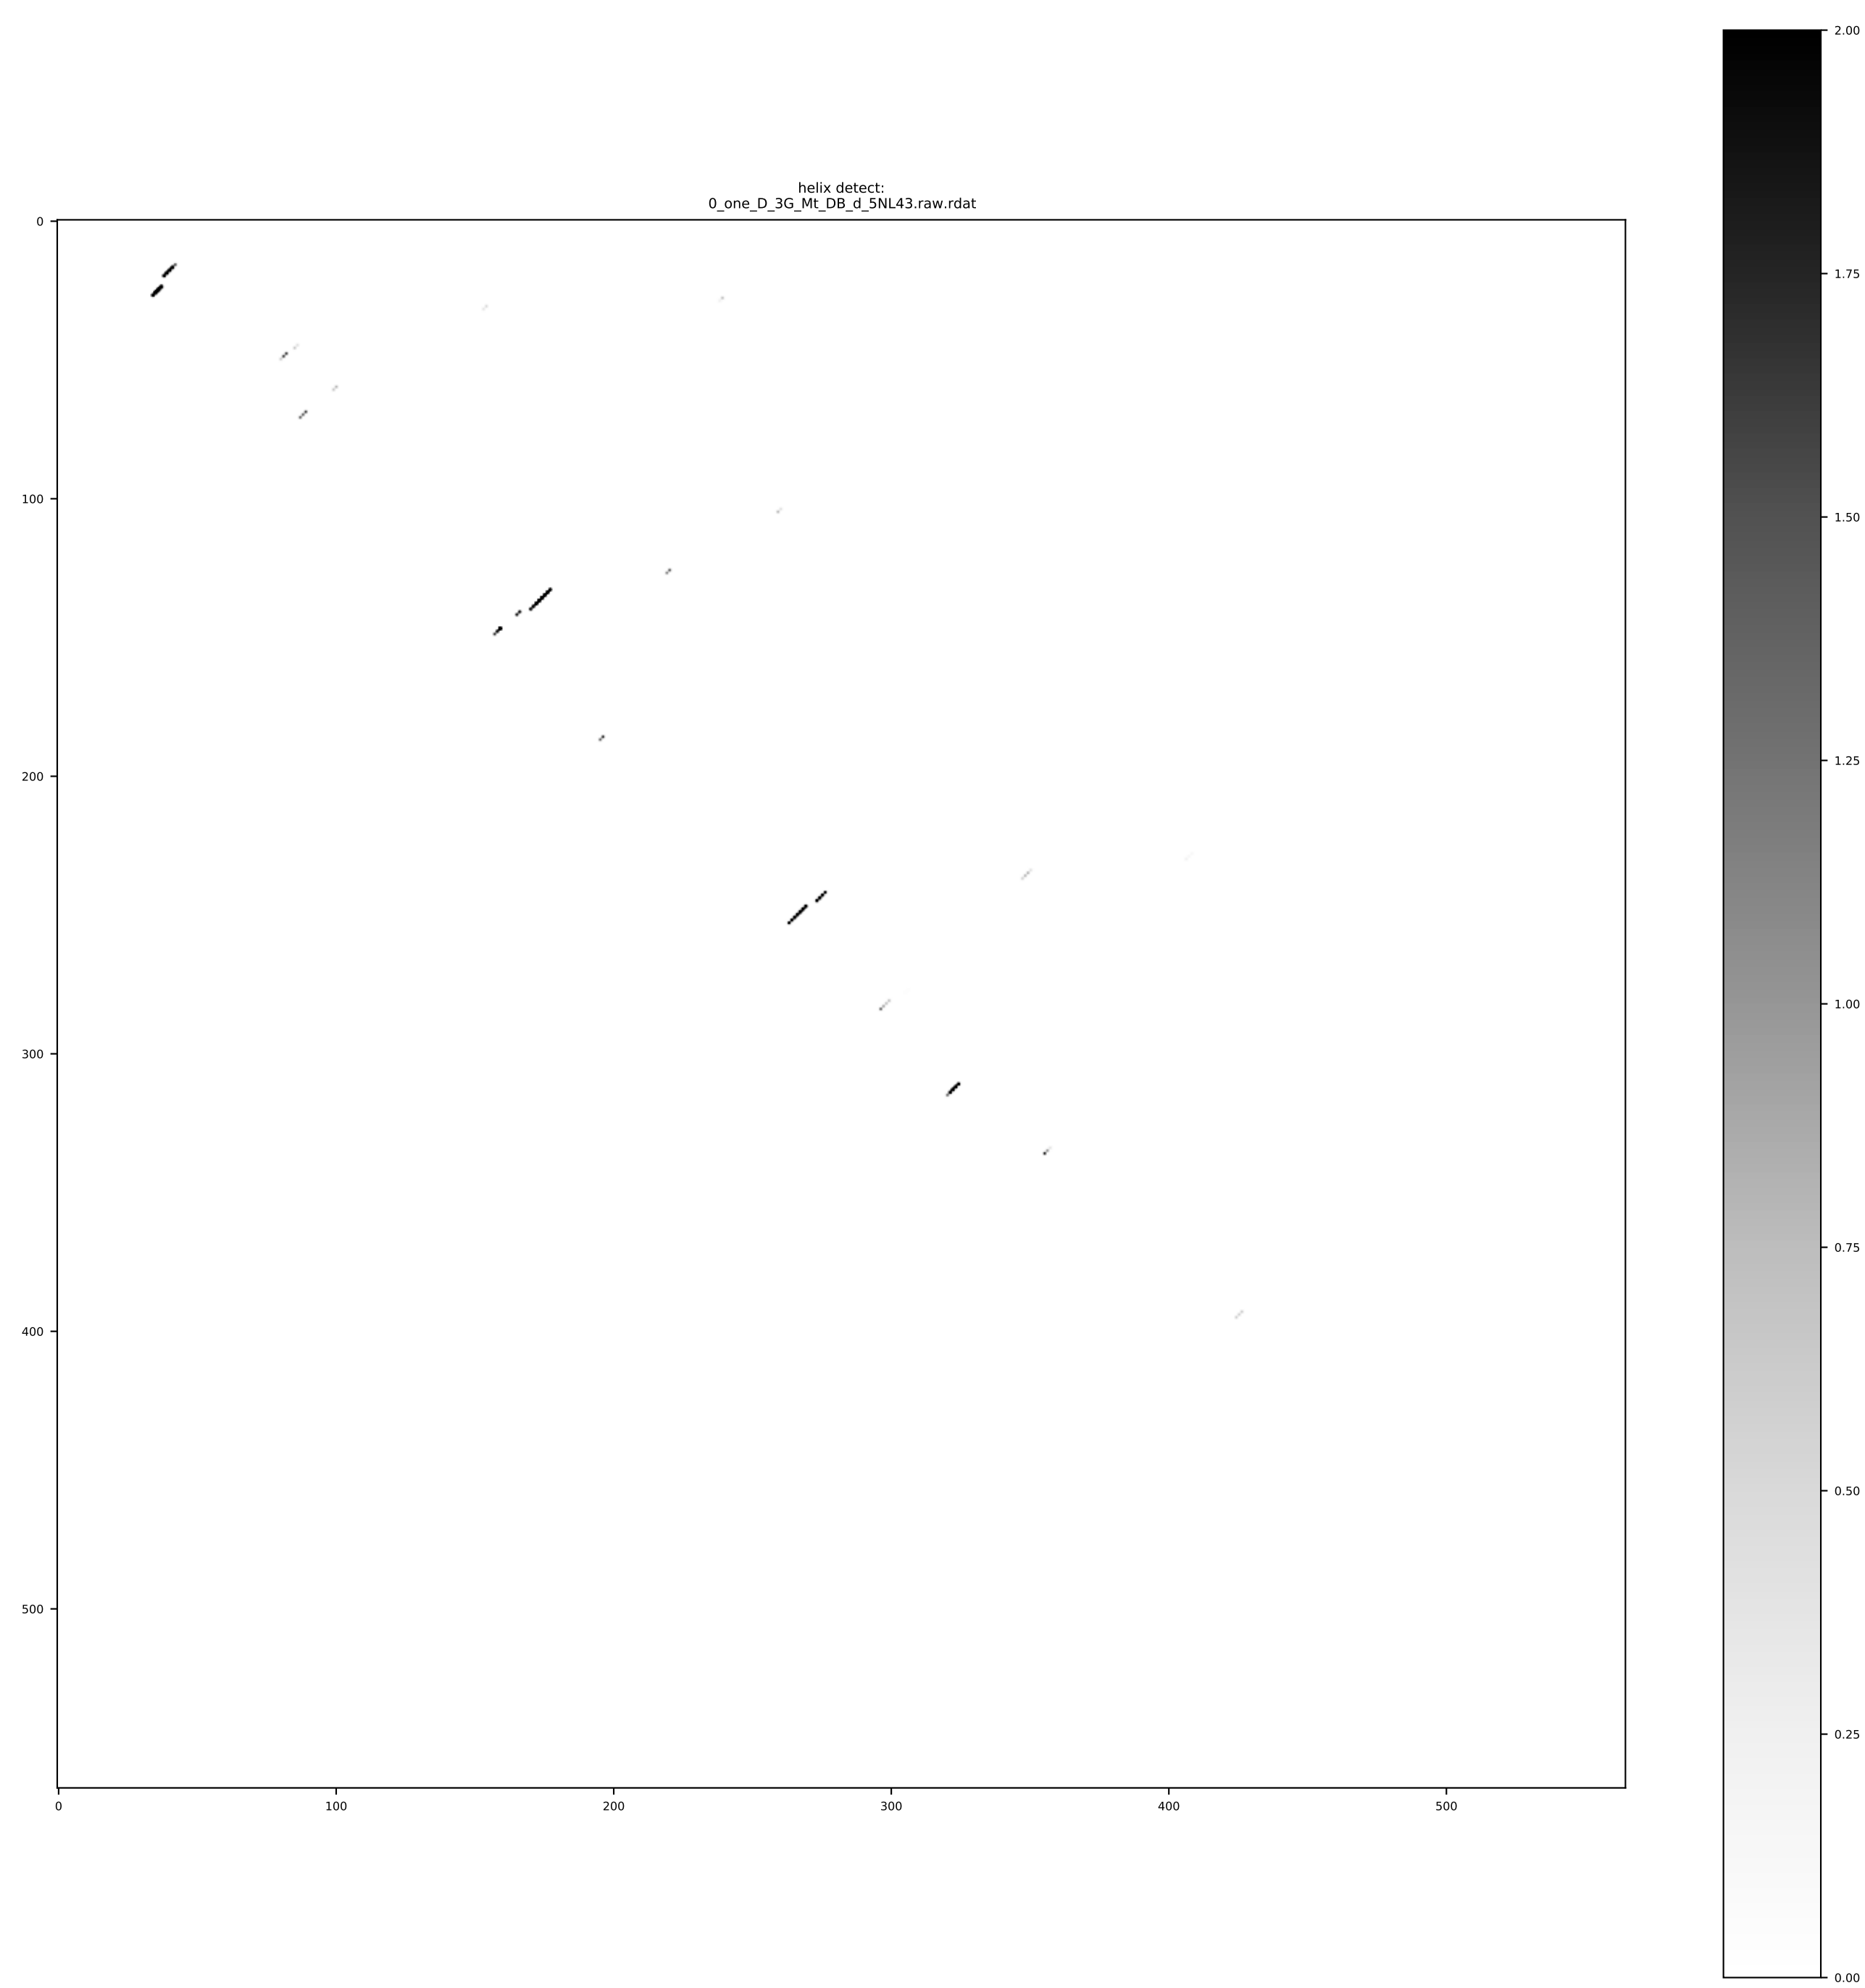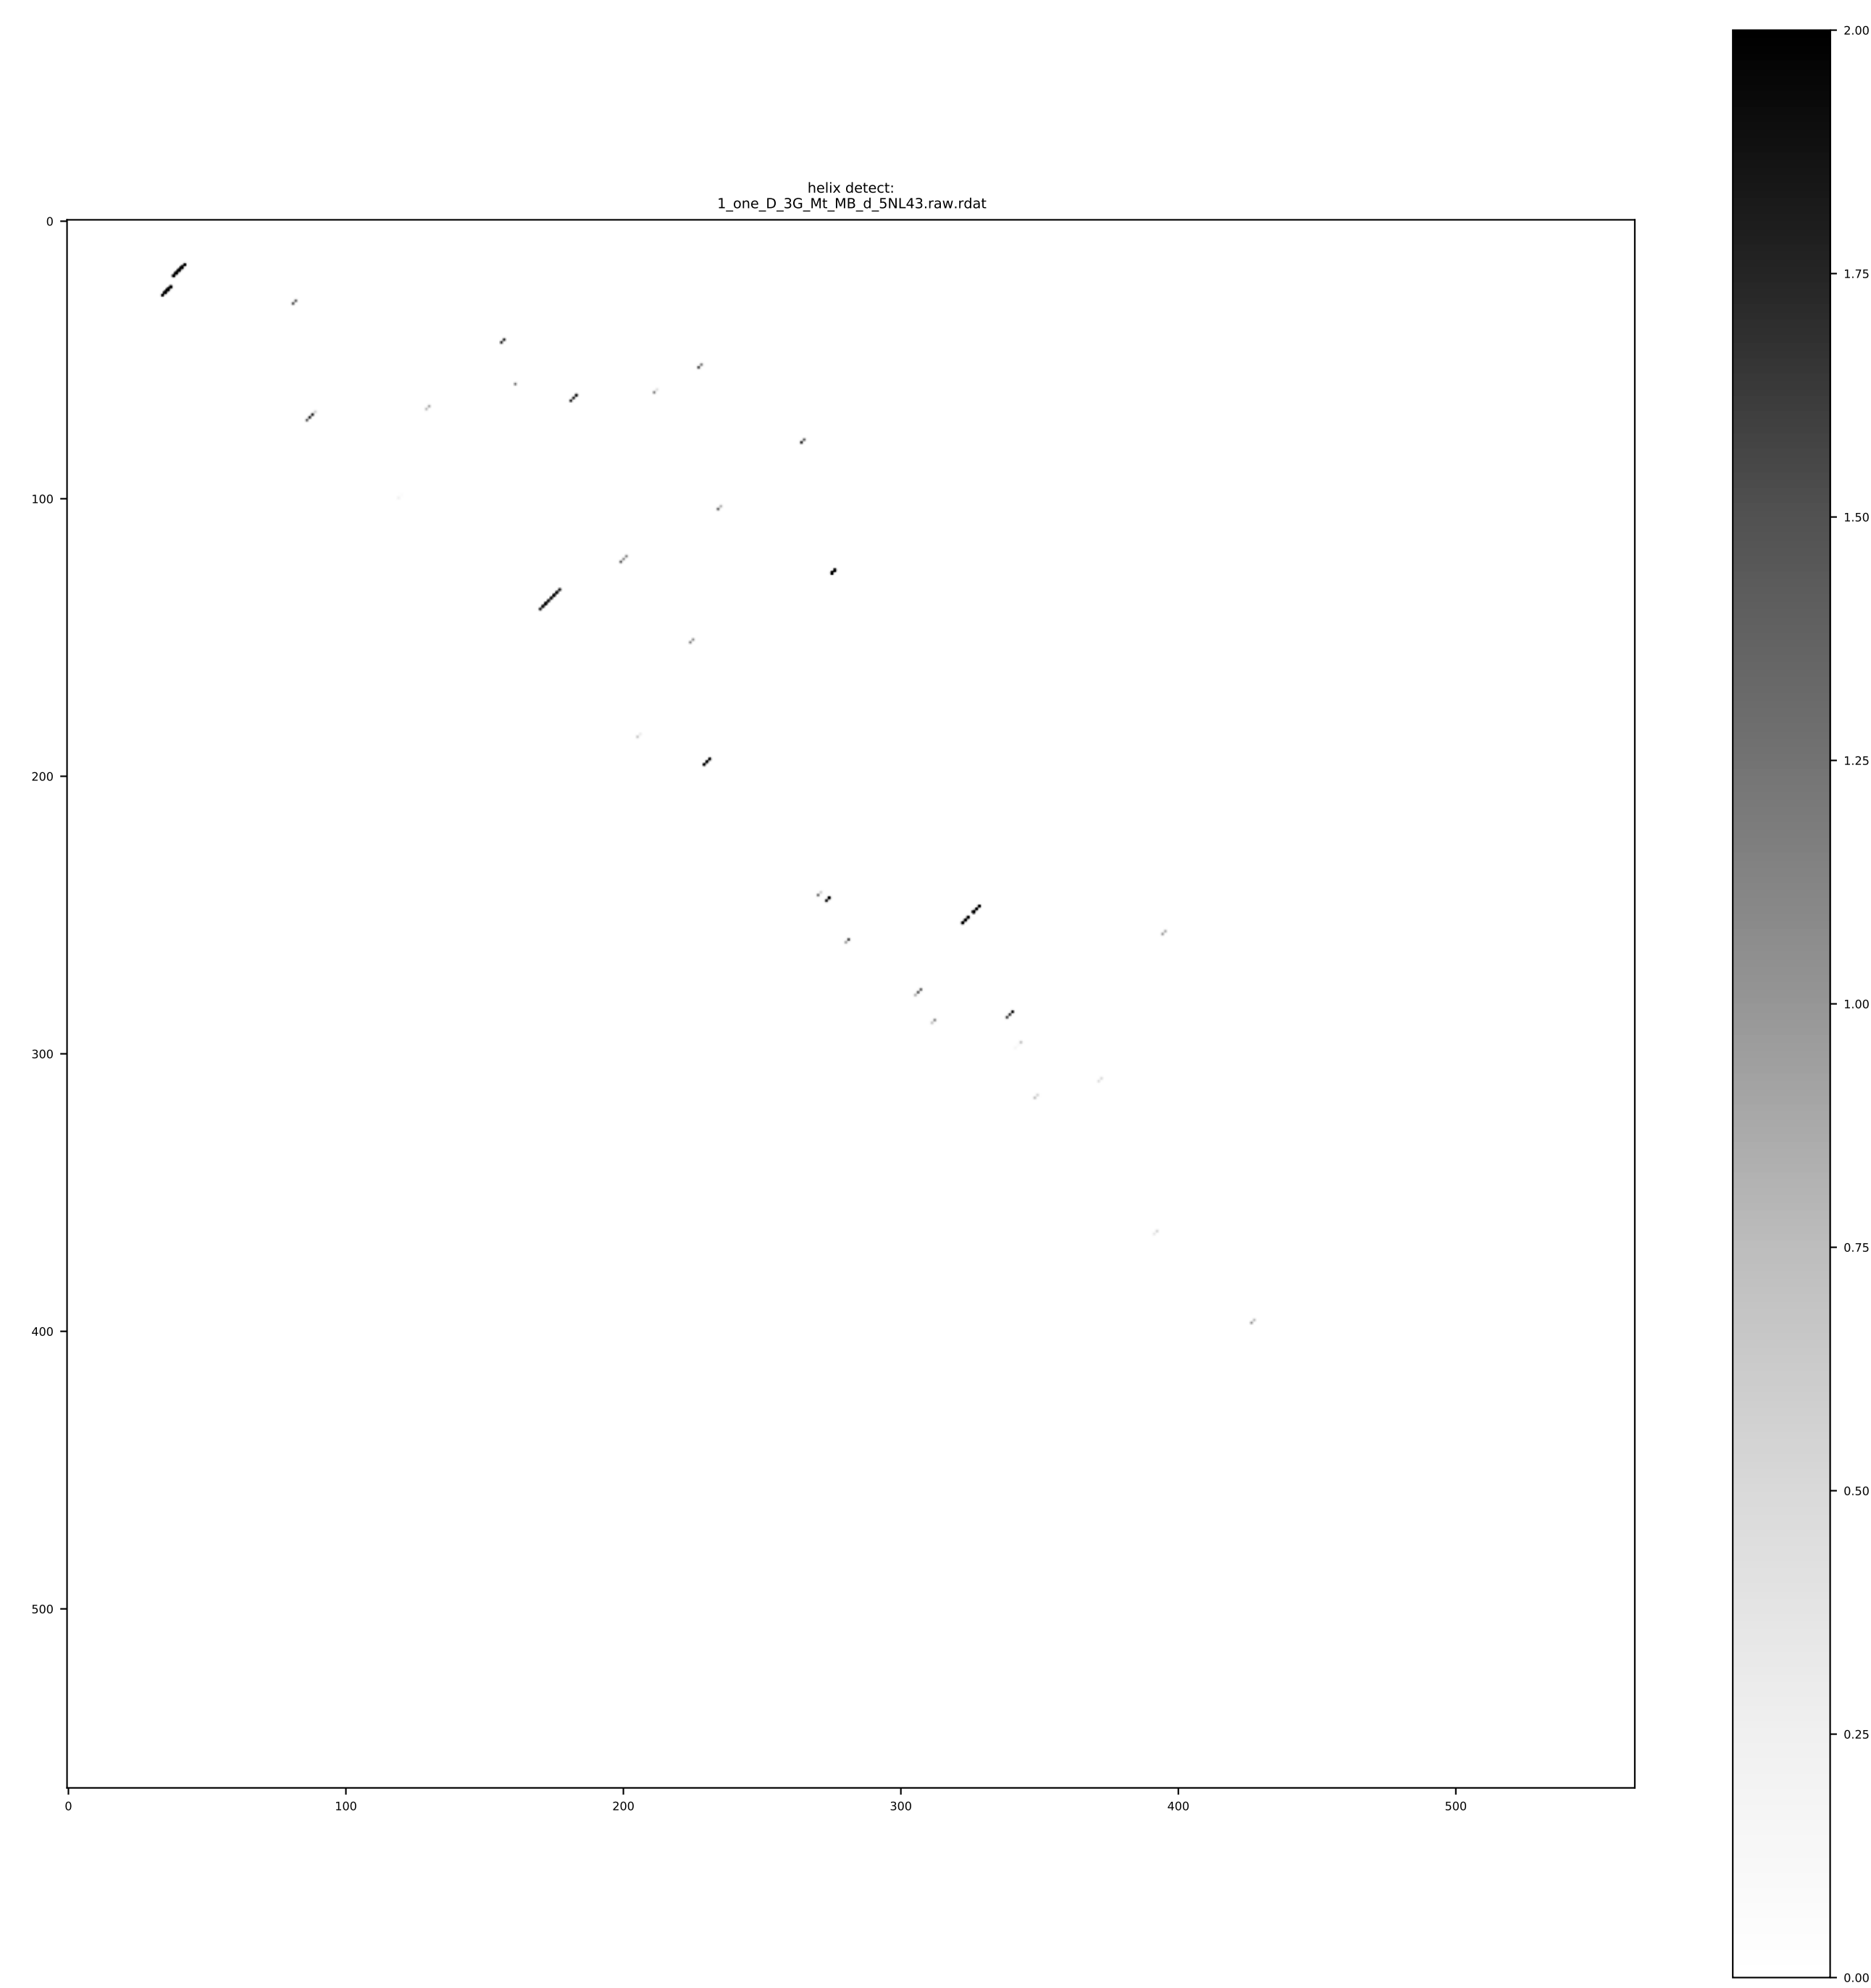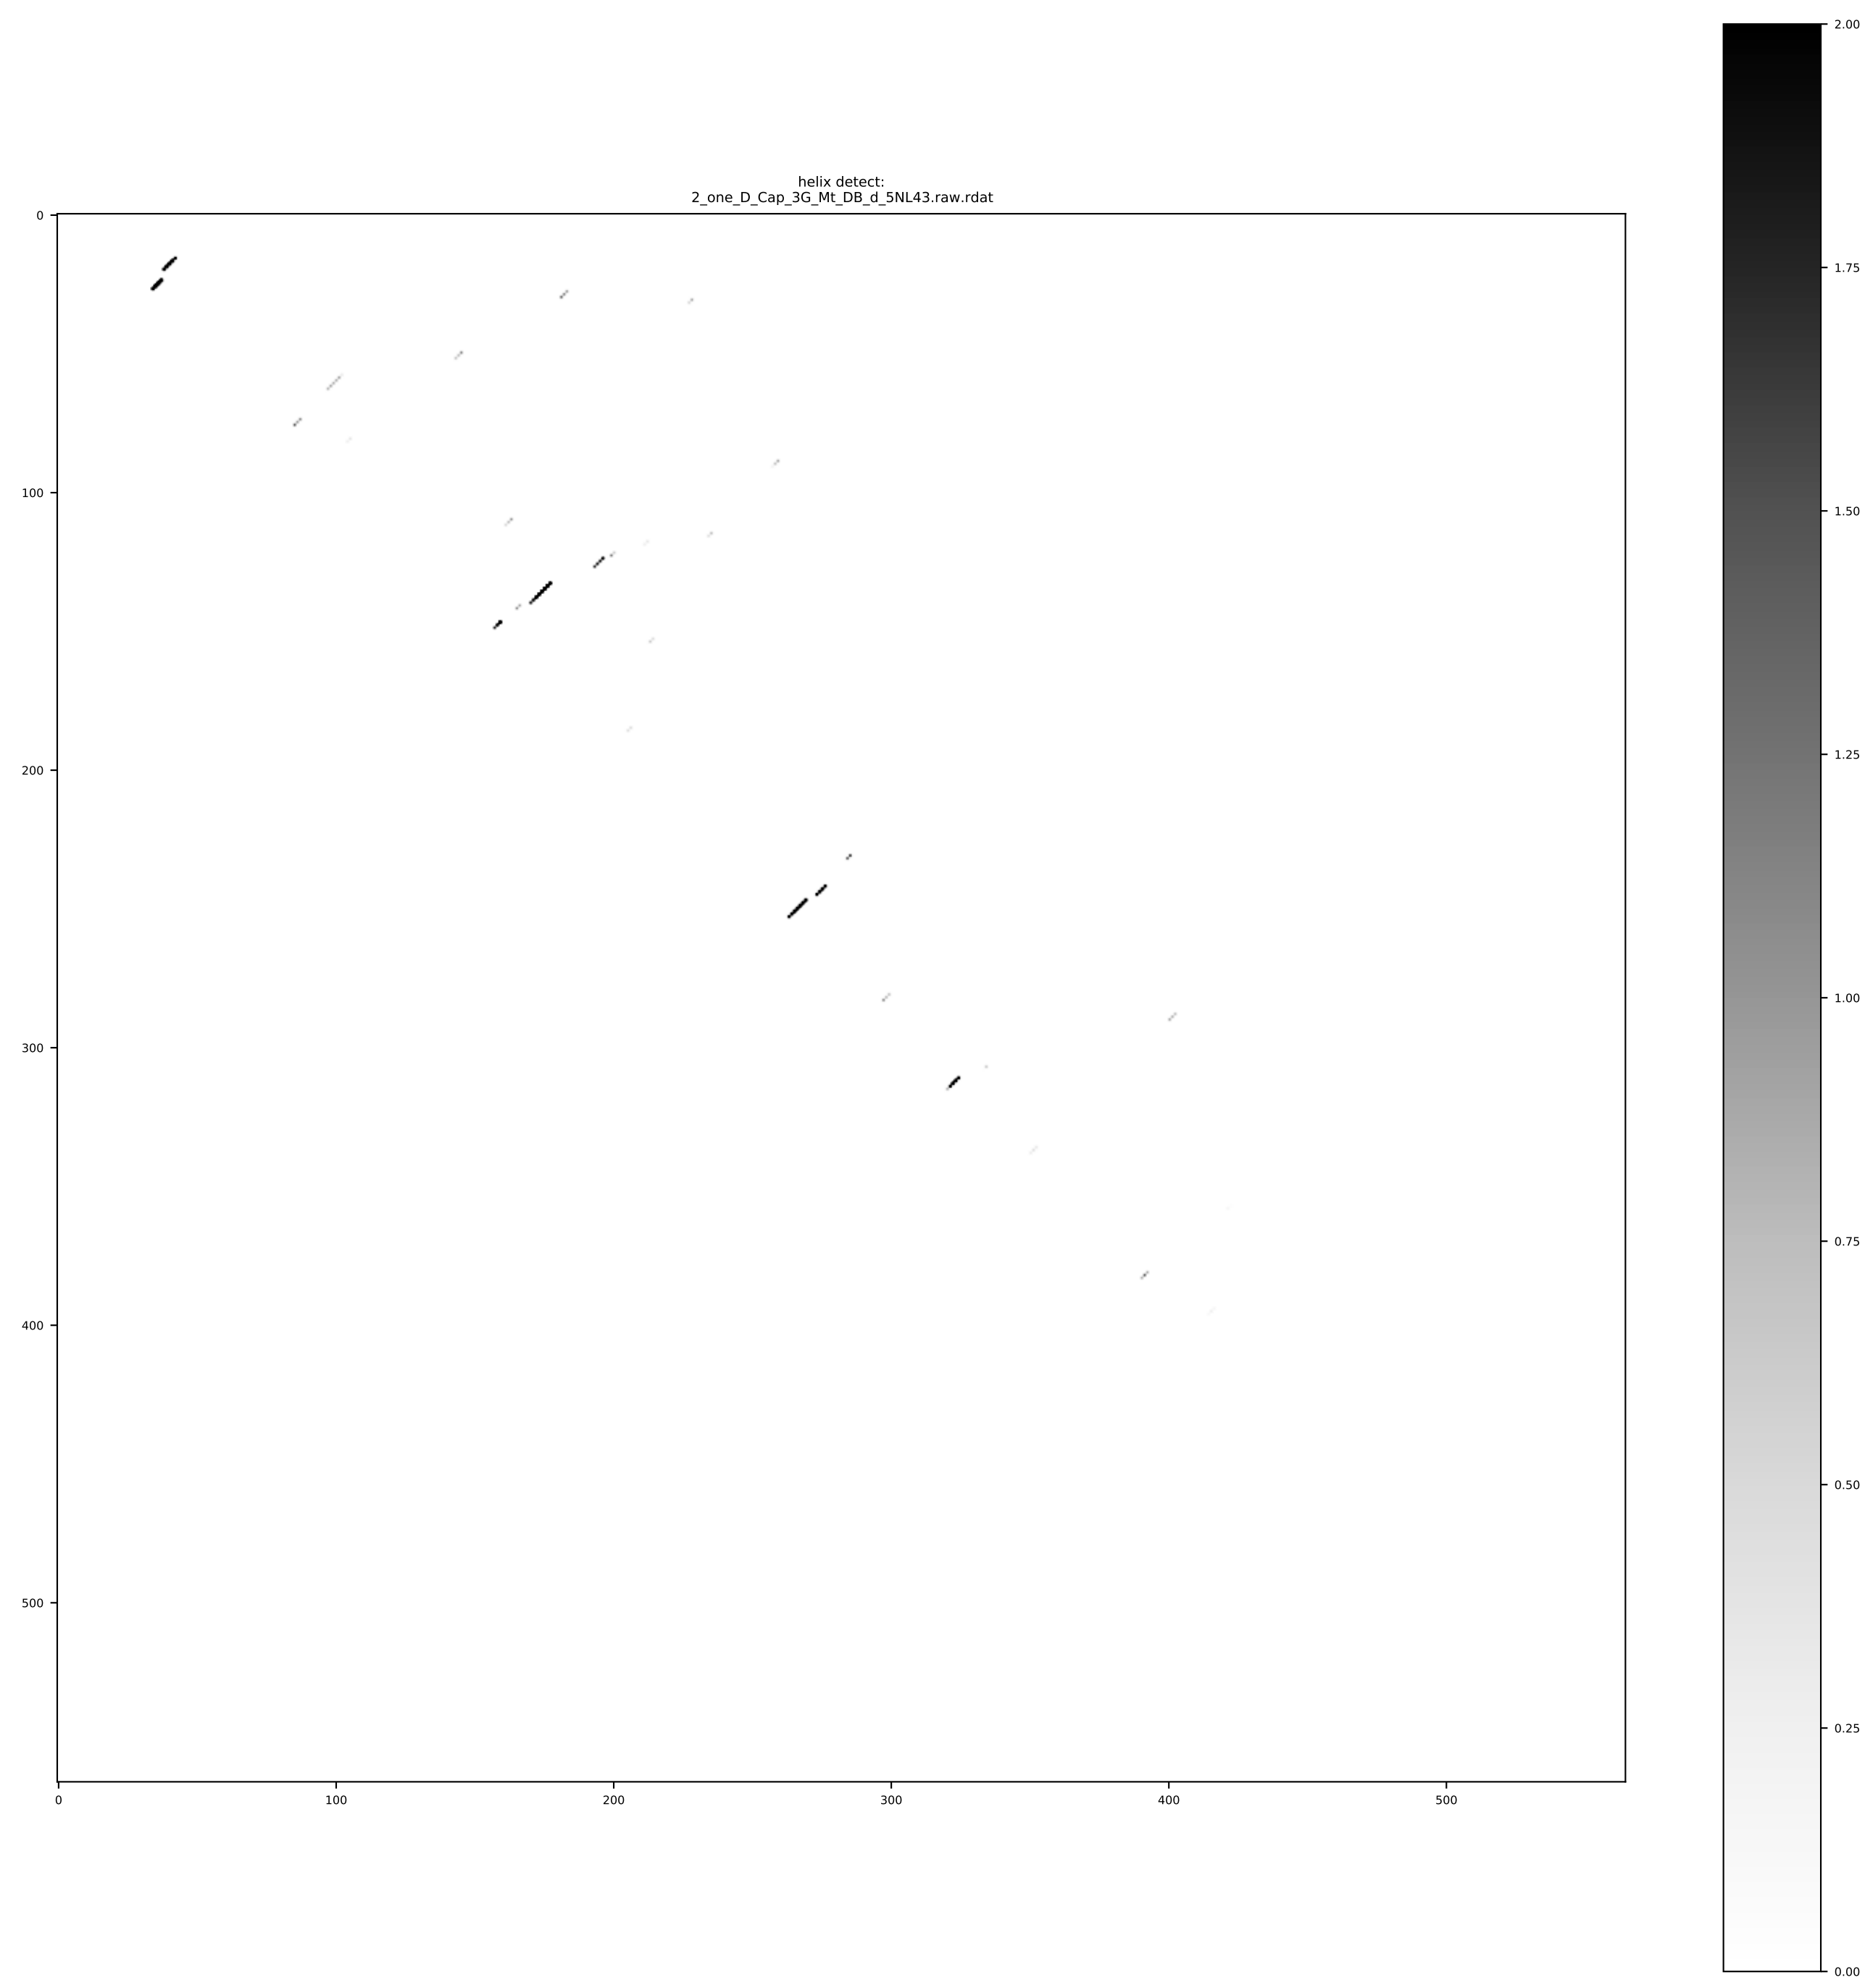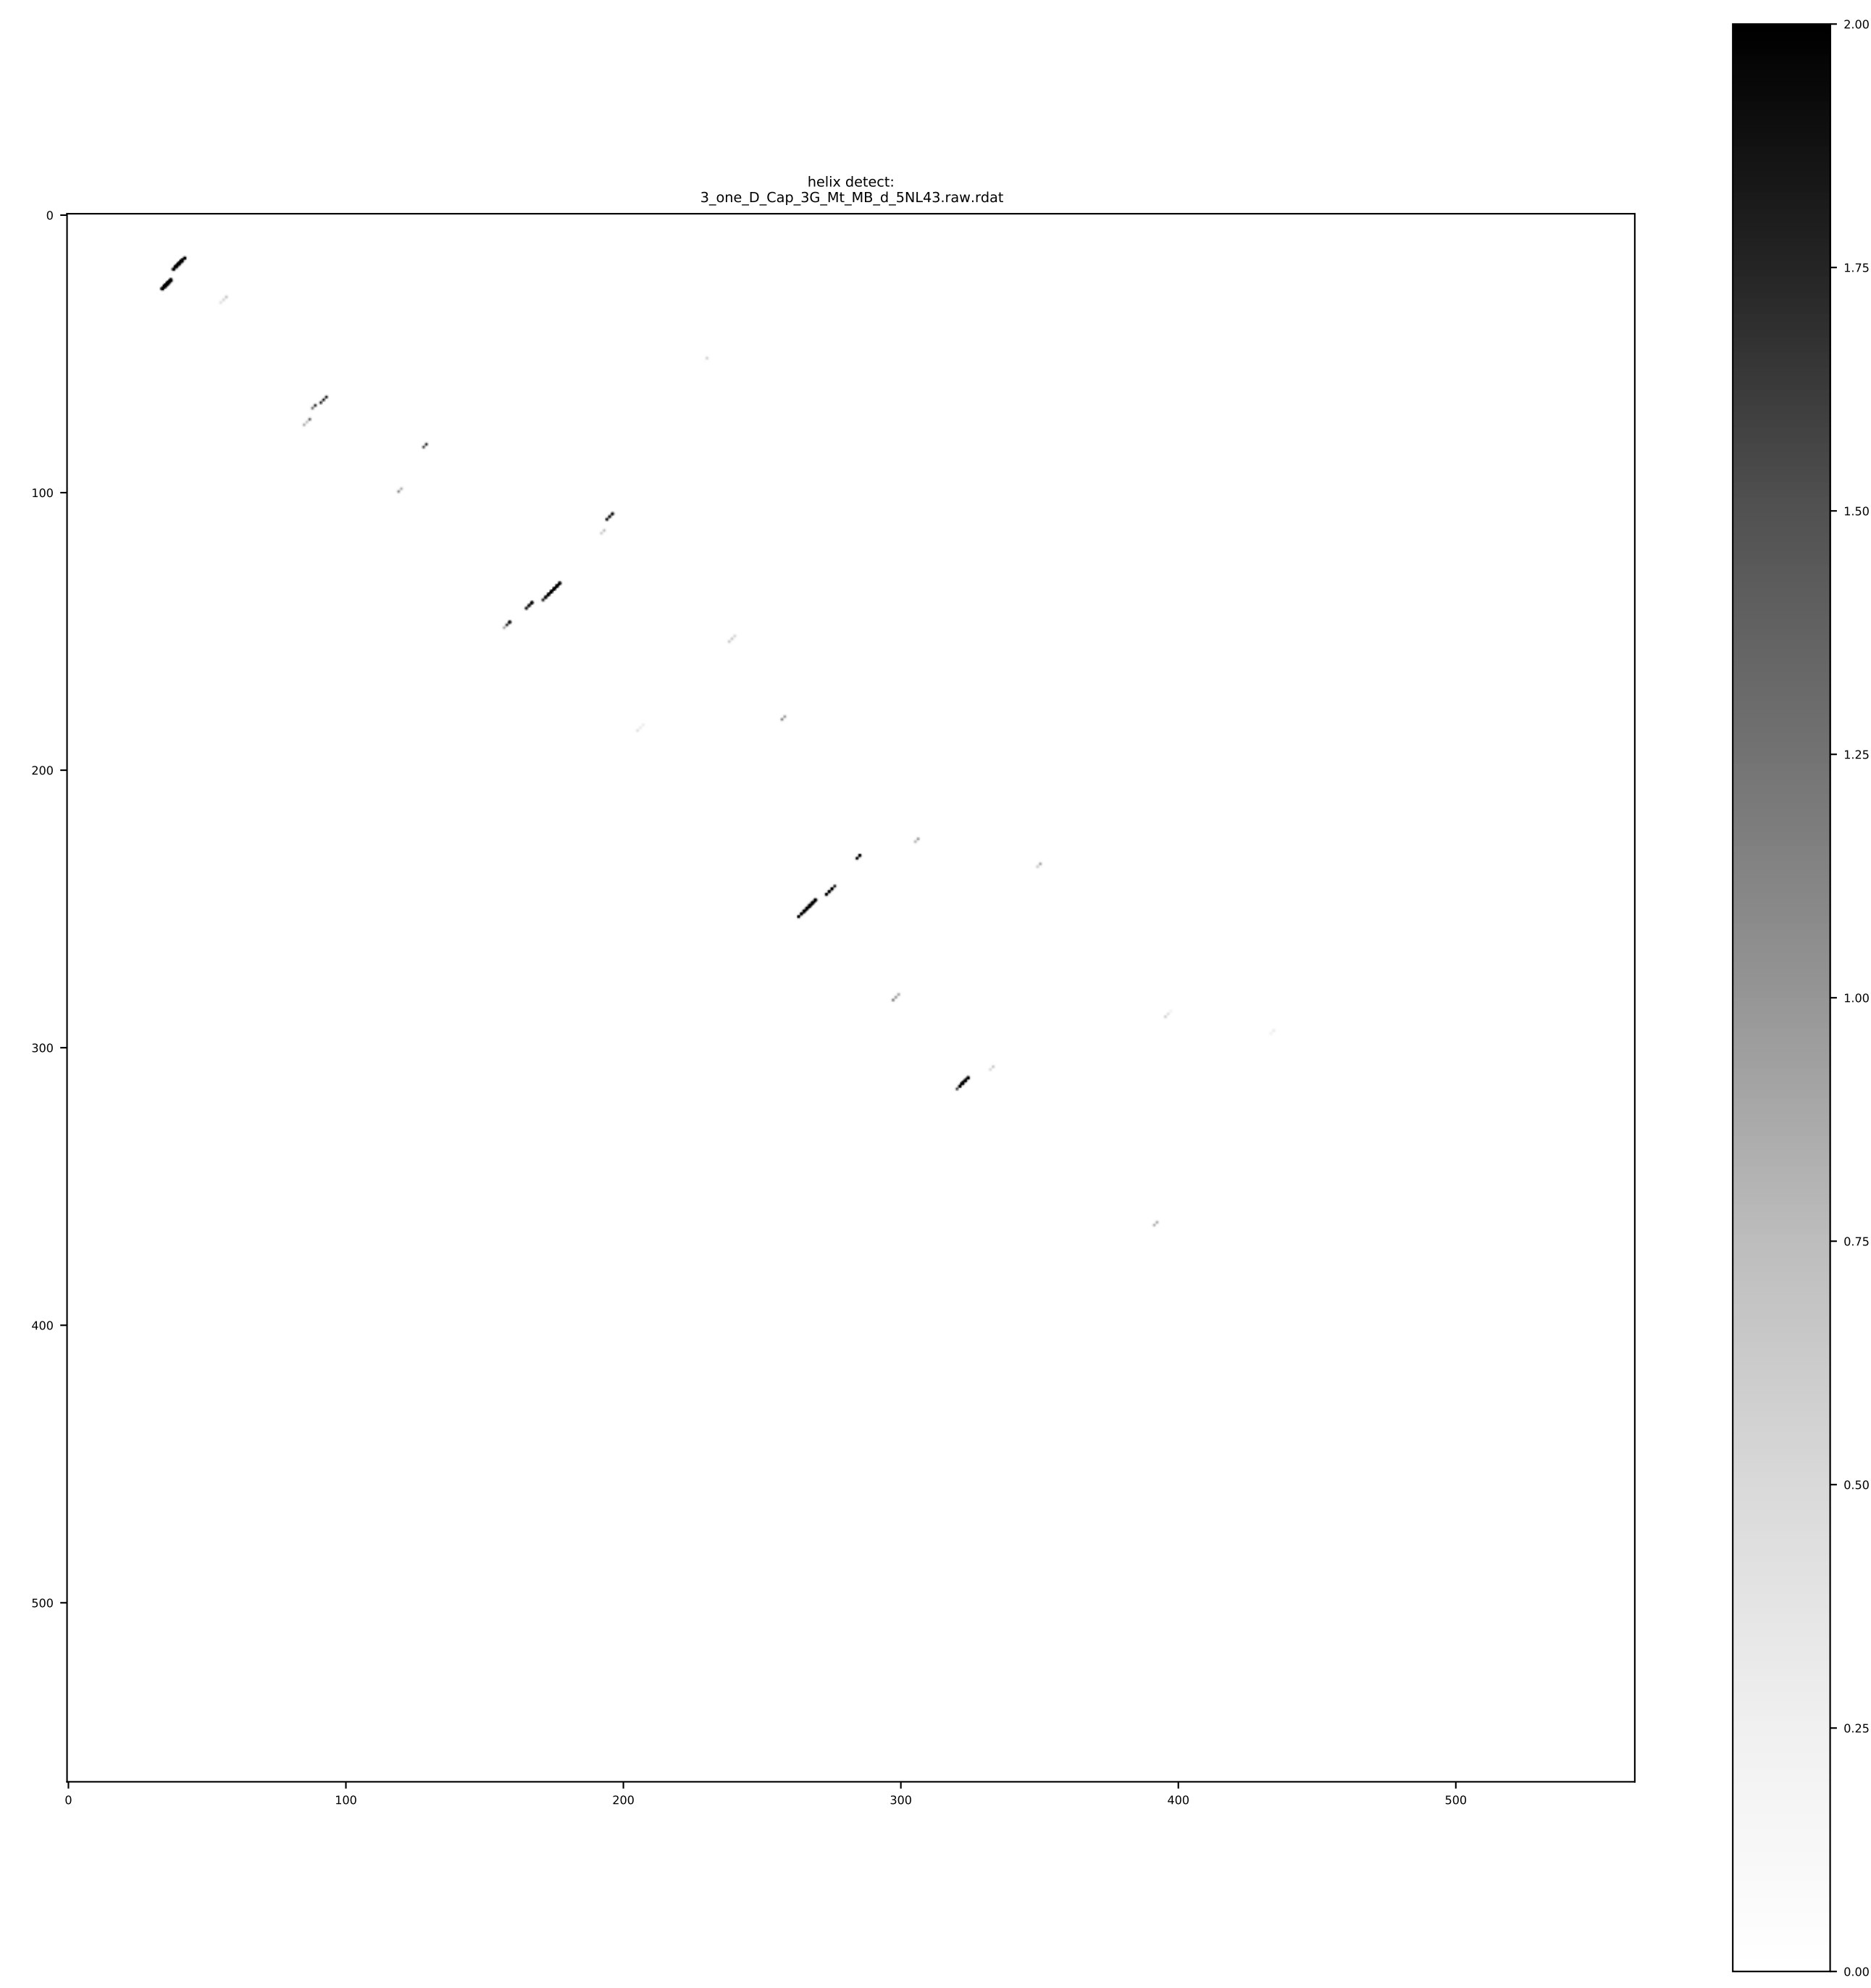

Supplement: Supplementary file 13 [file threeG_dimer_best_helix.pdf › 2d-structure-inference/best_helix/threeG_dimer_best_helix.pdf]

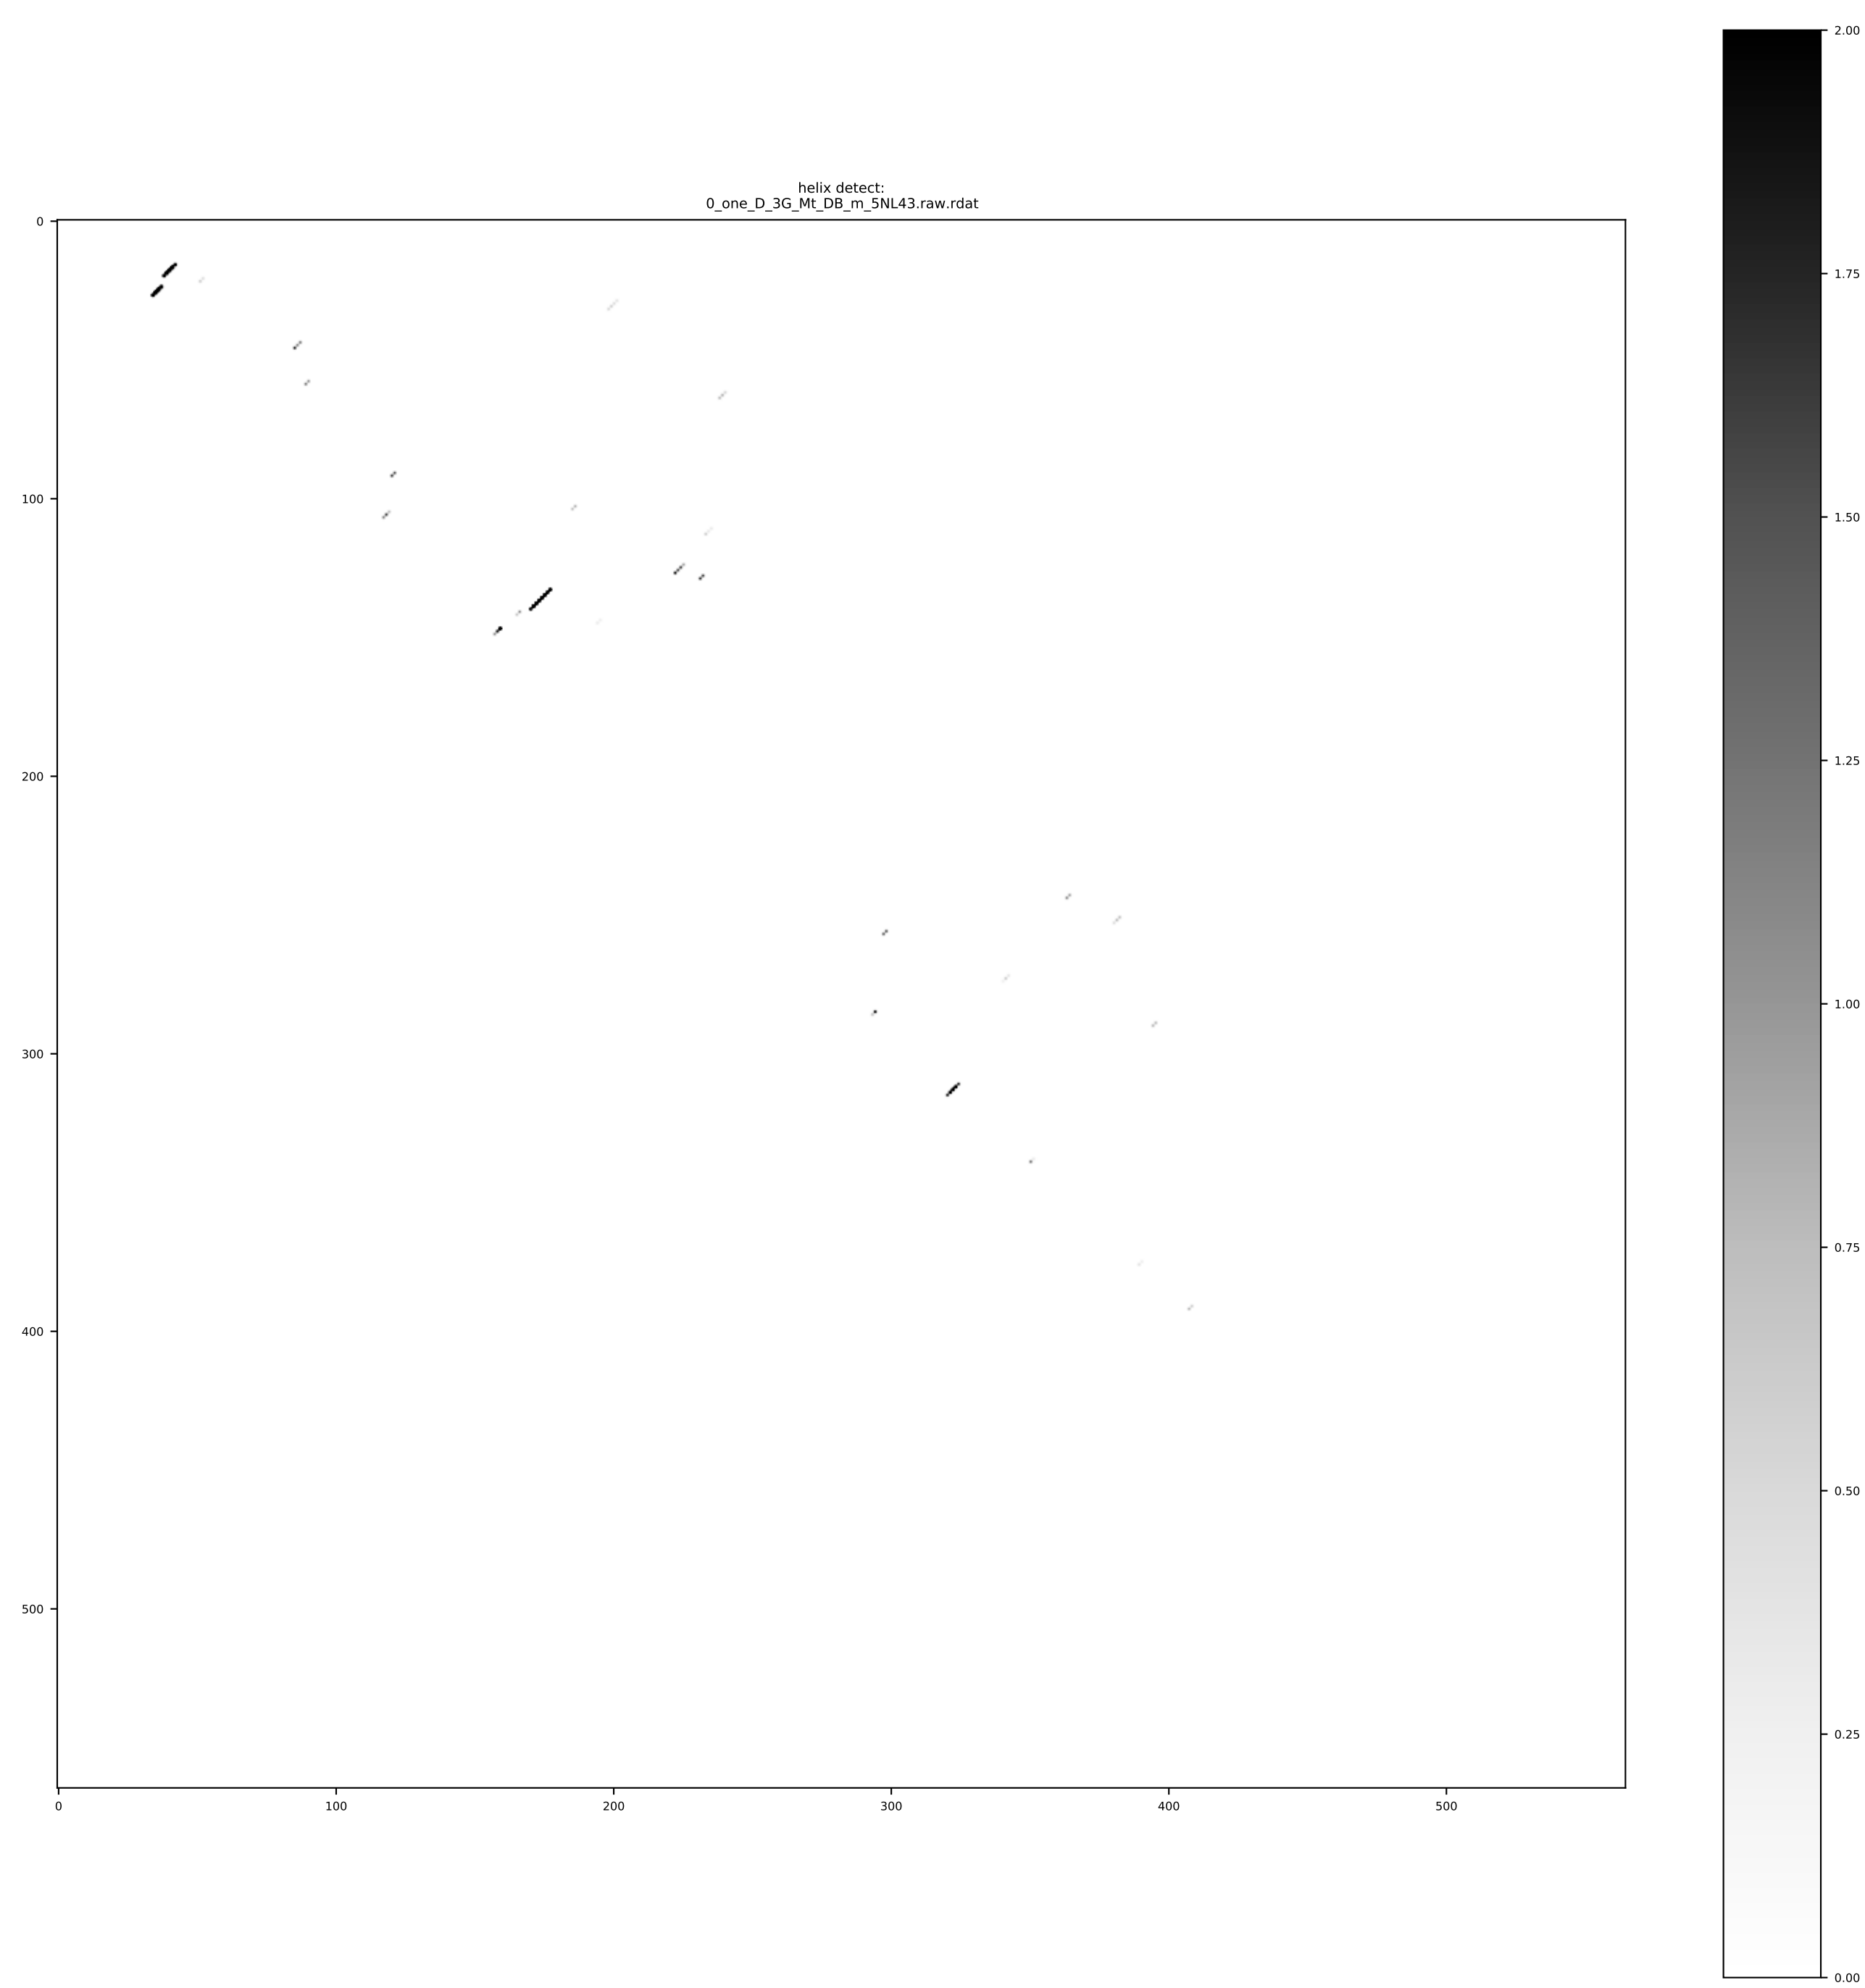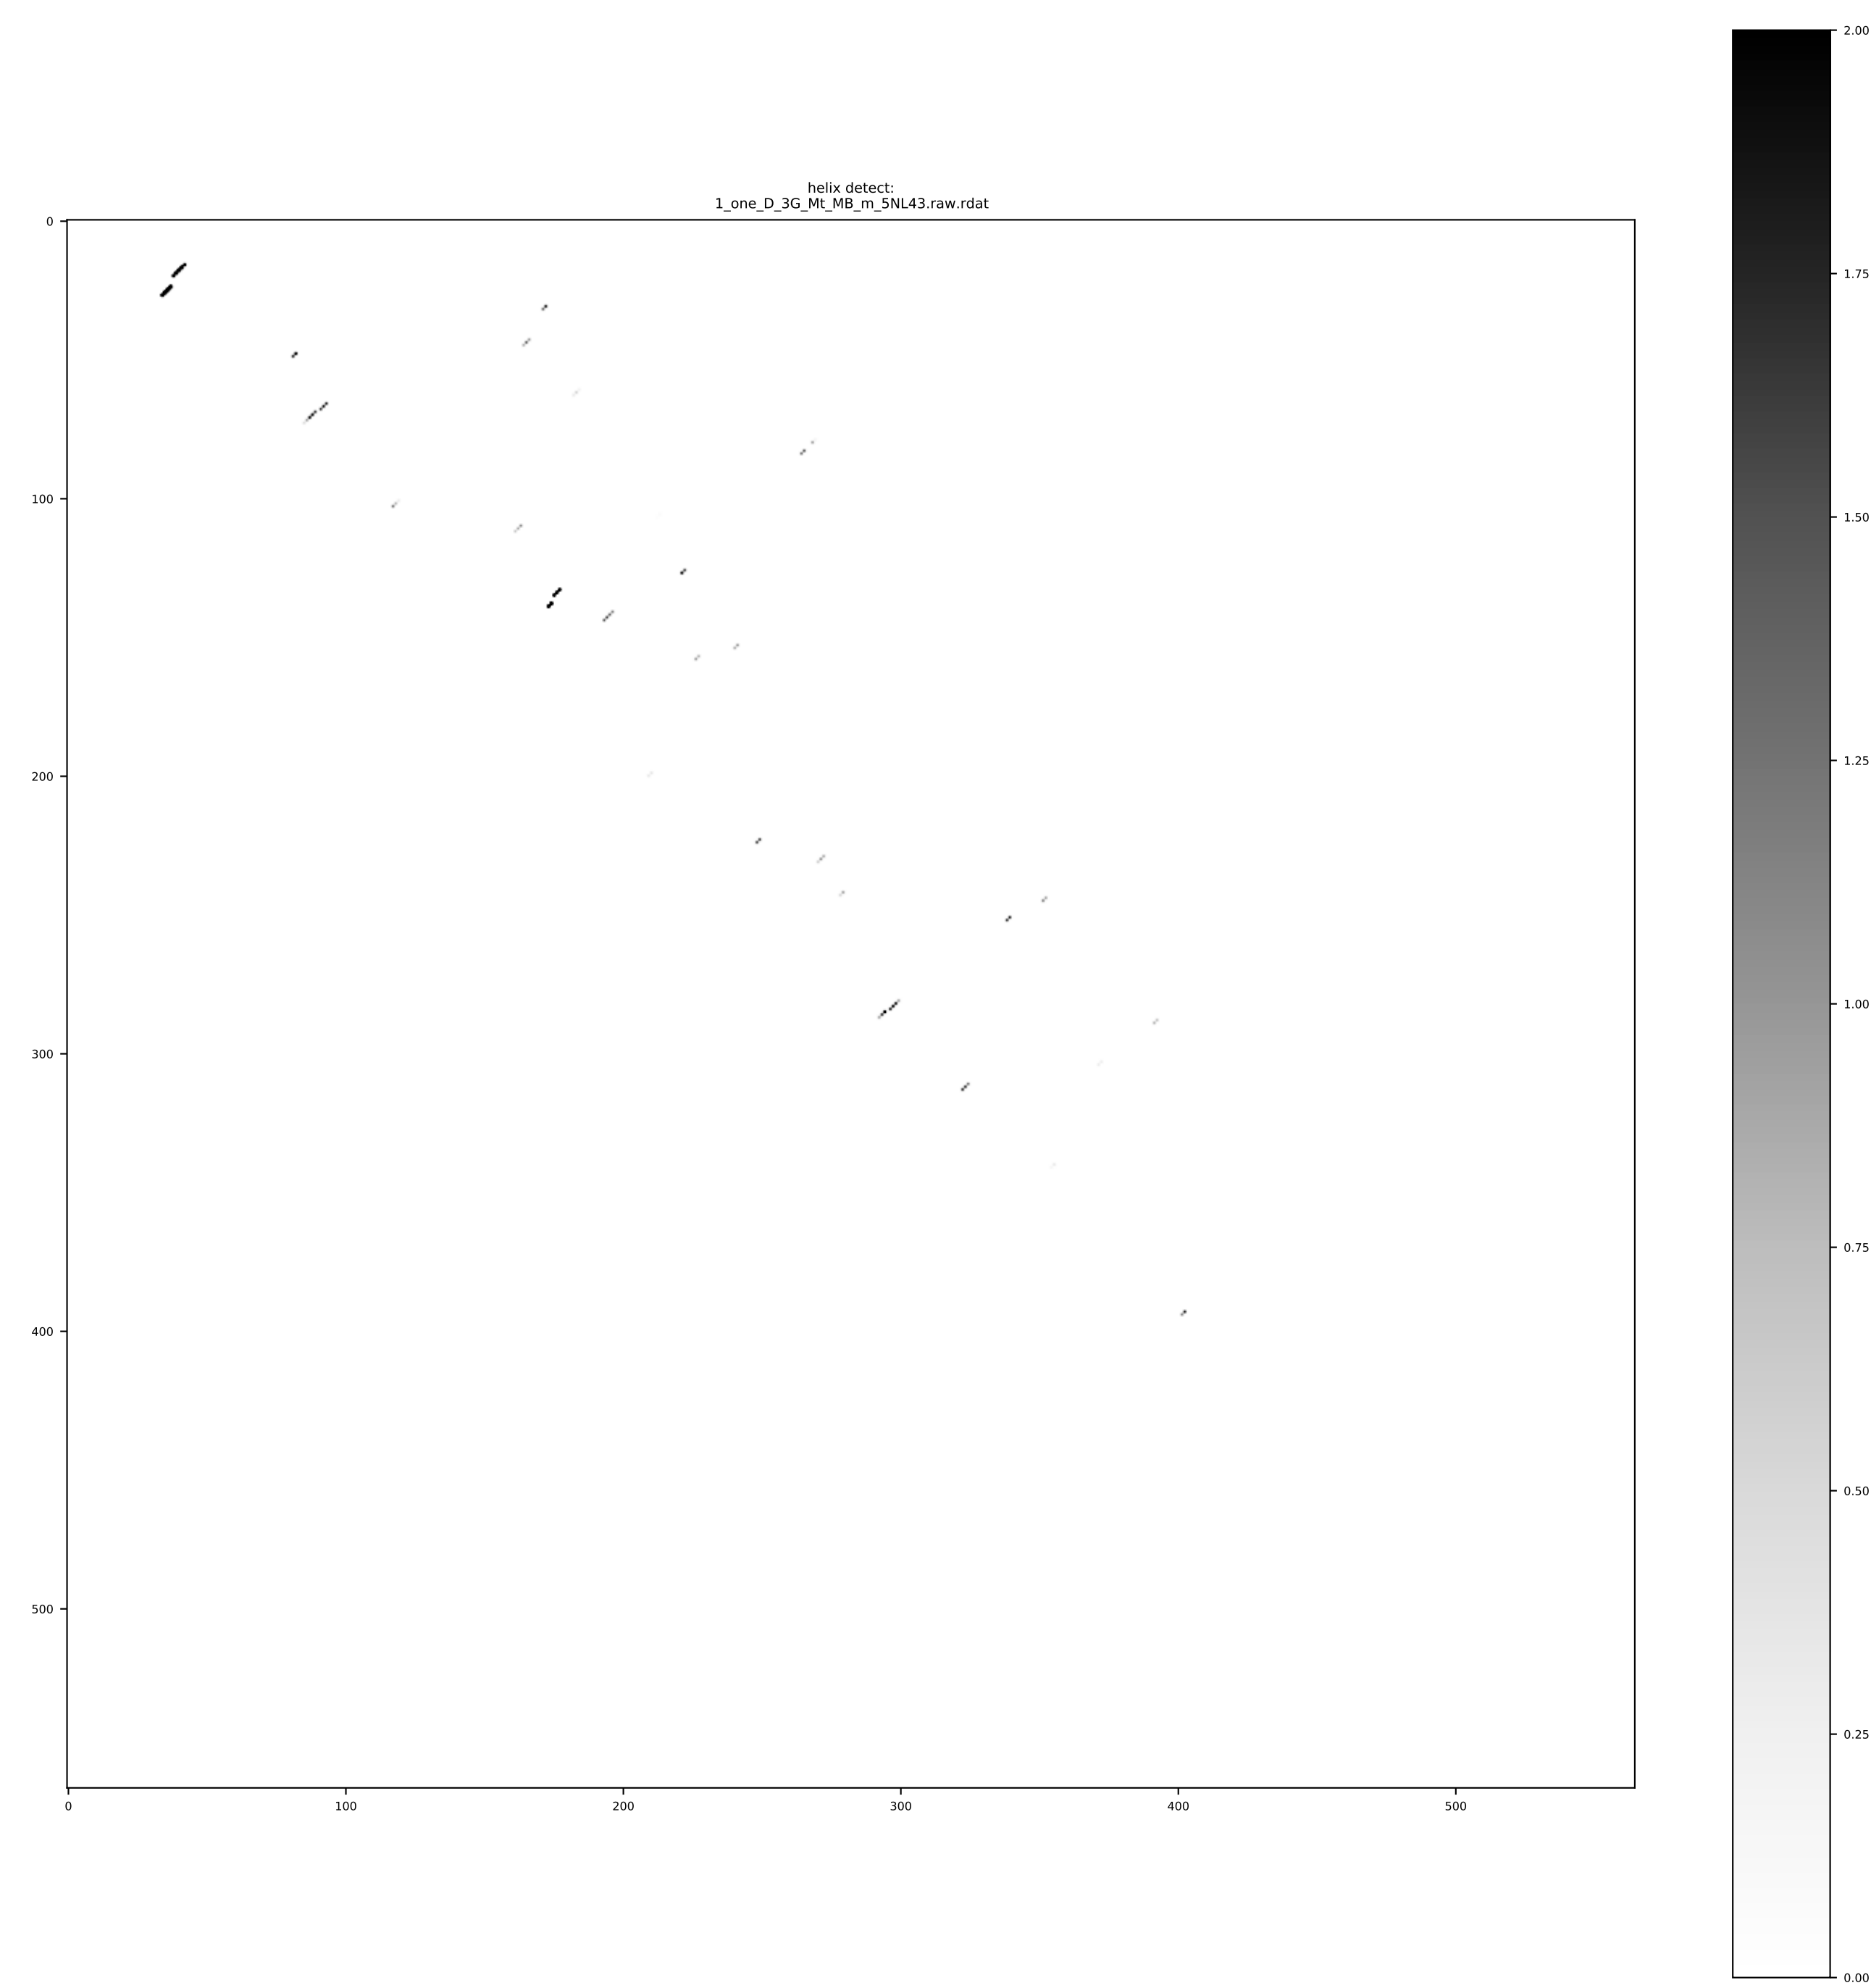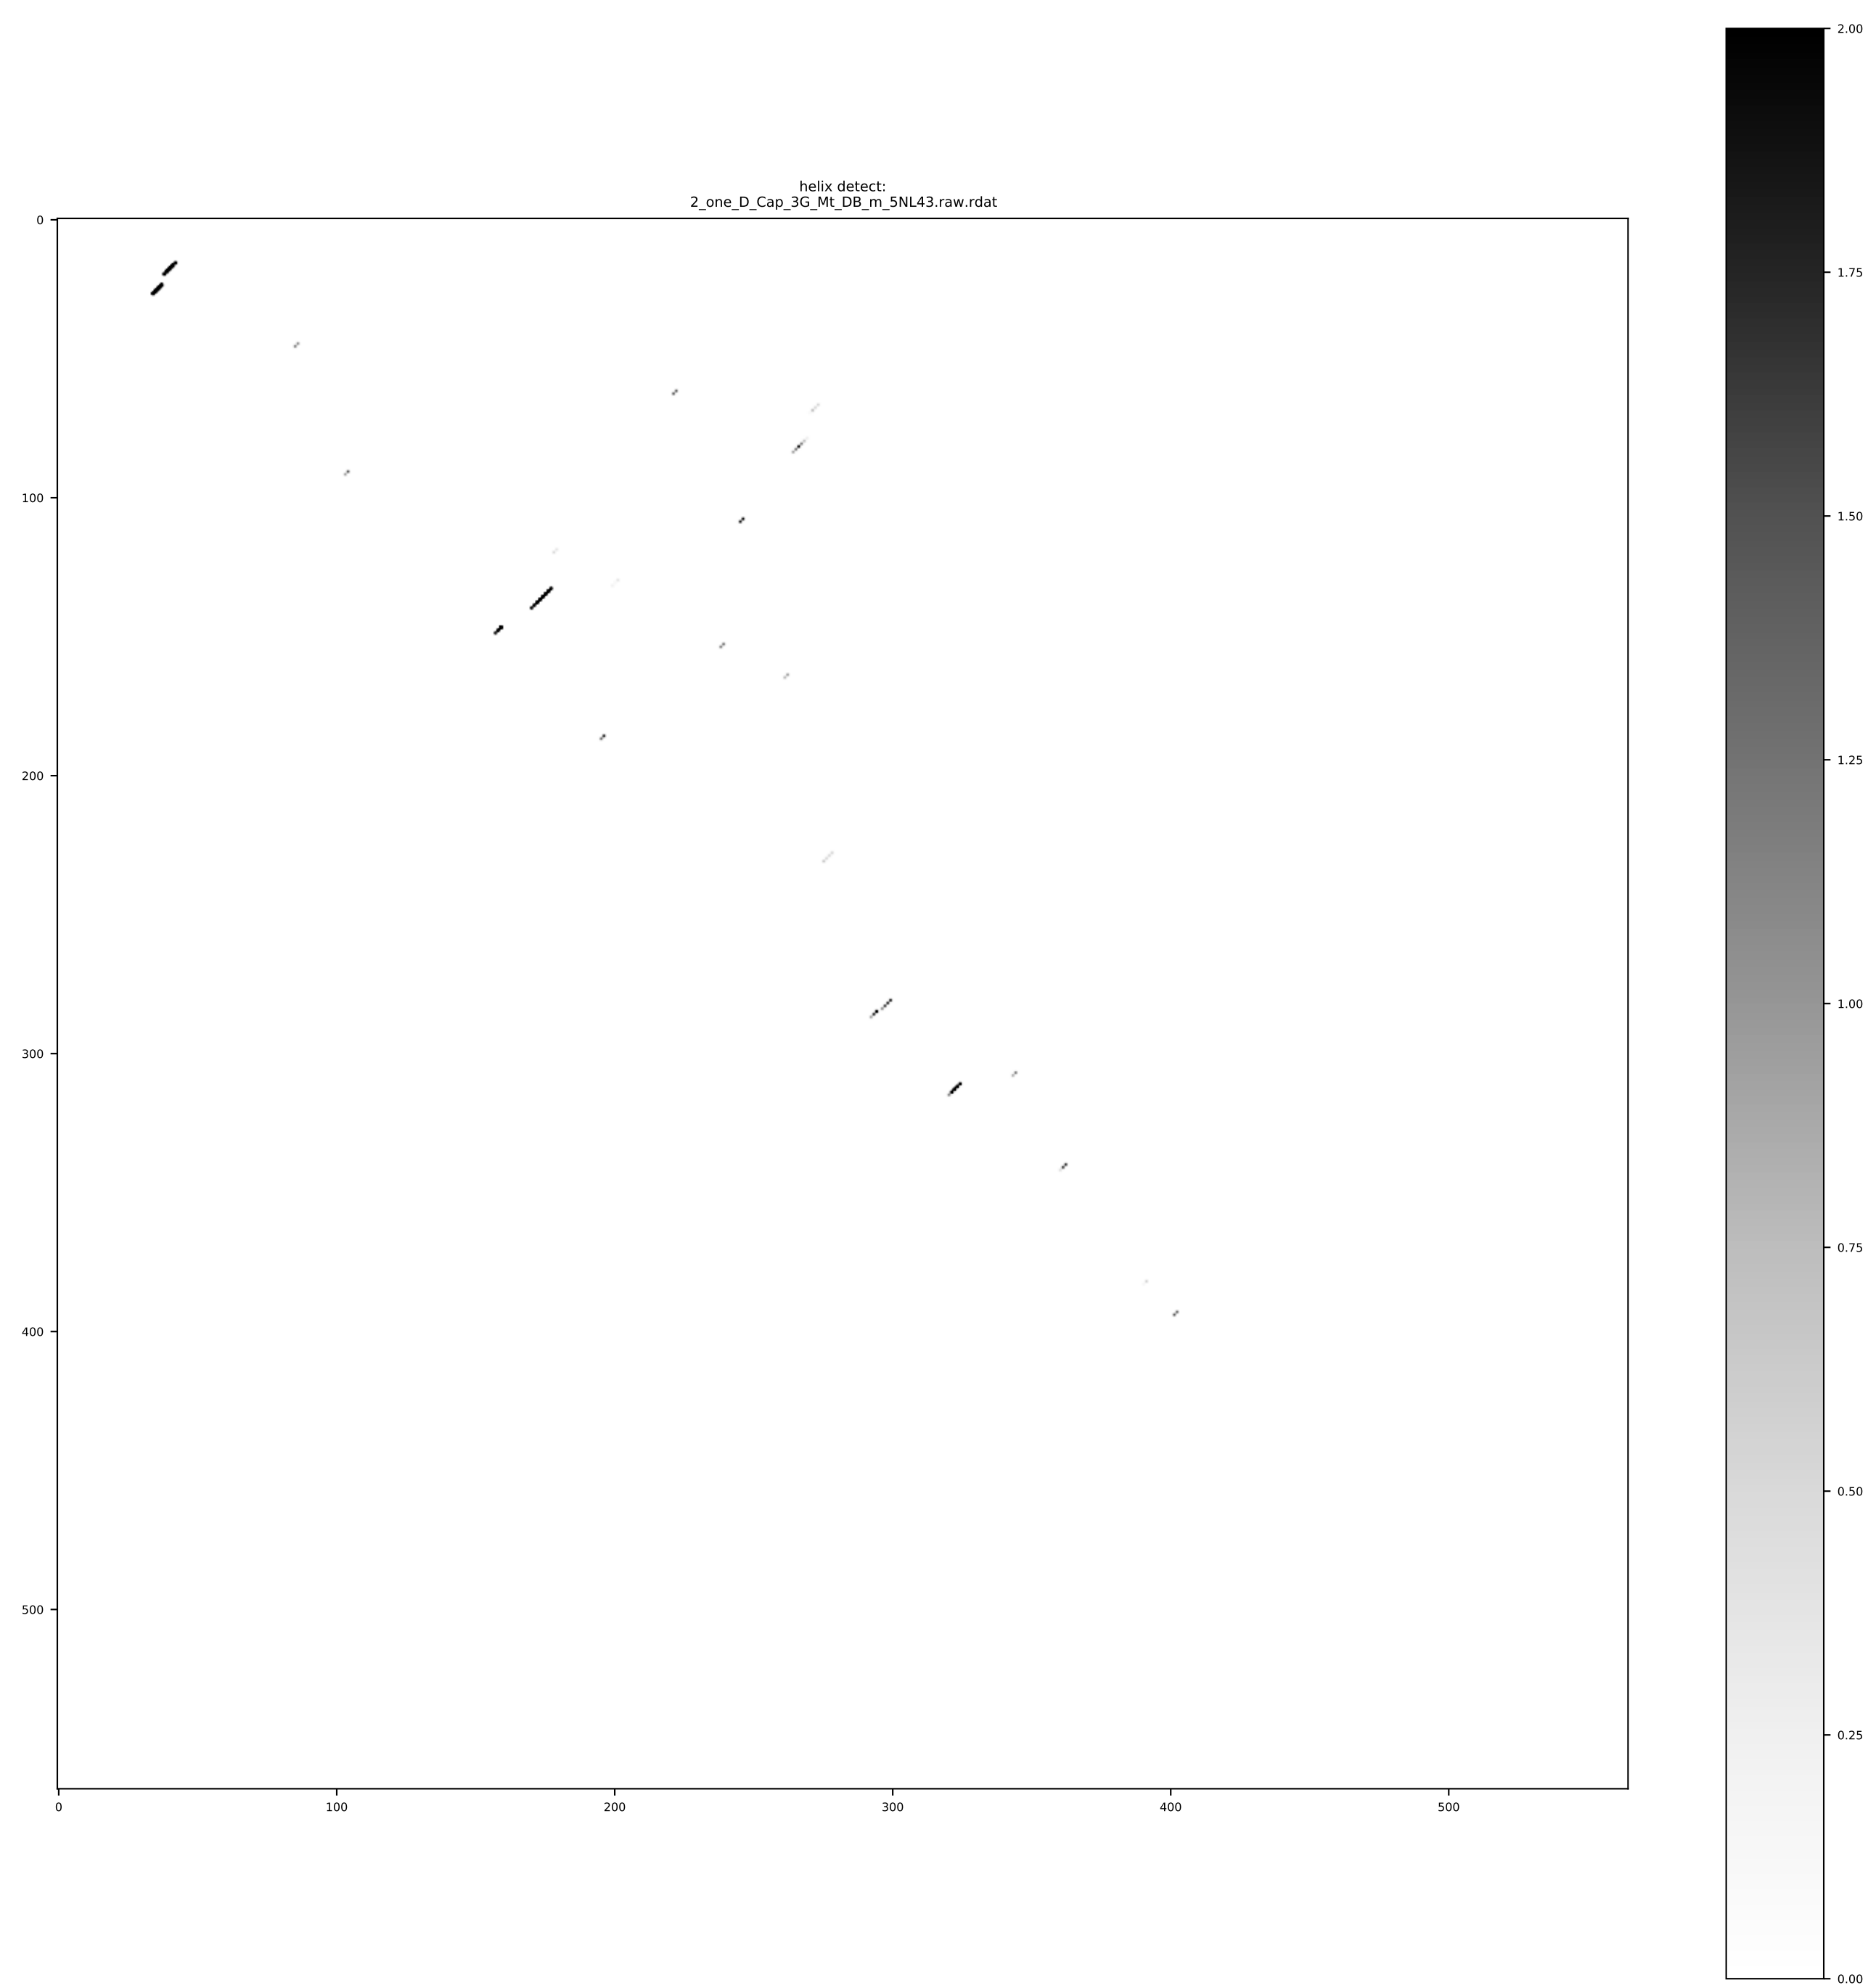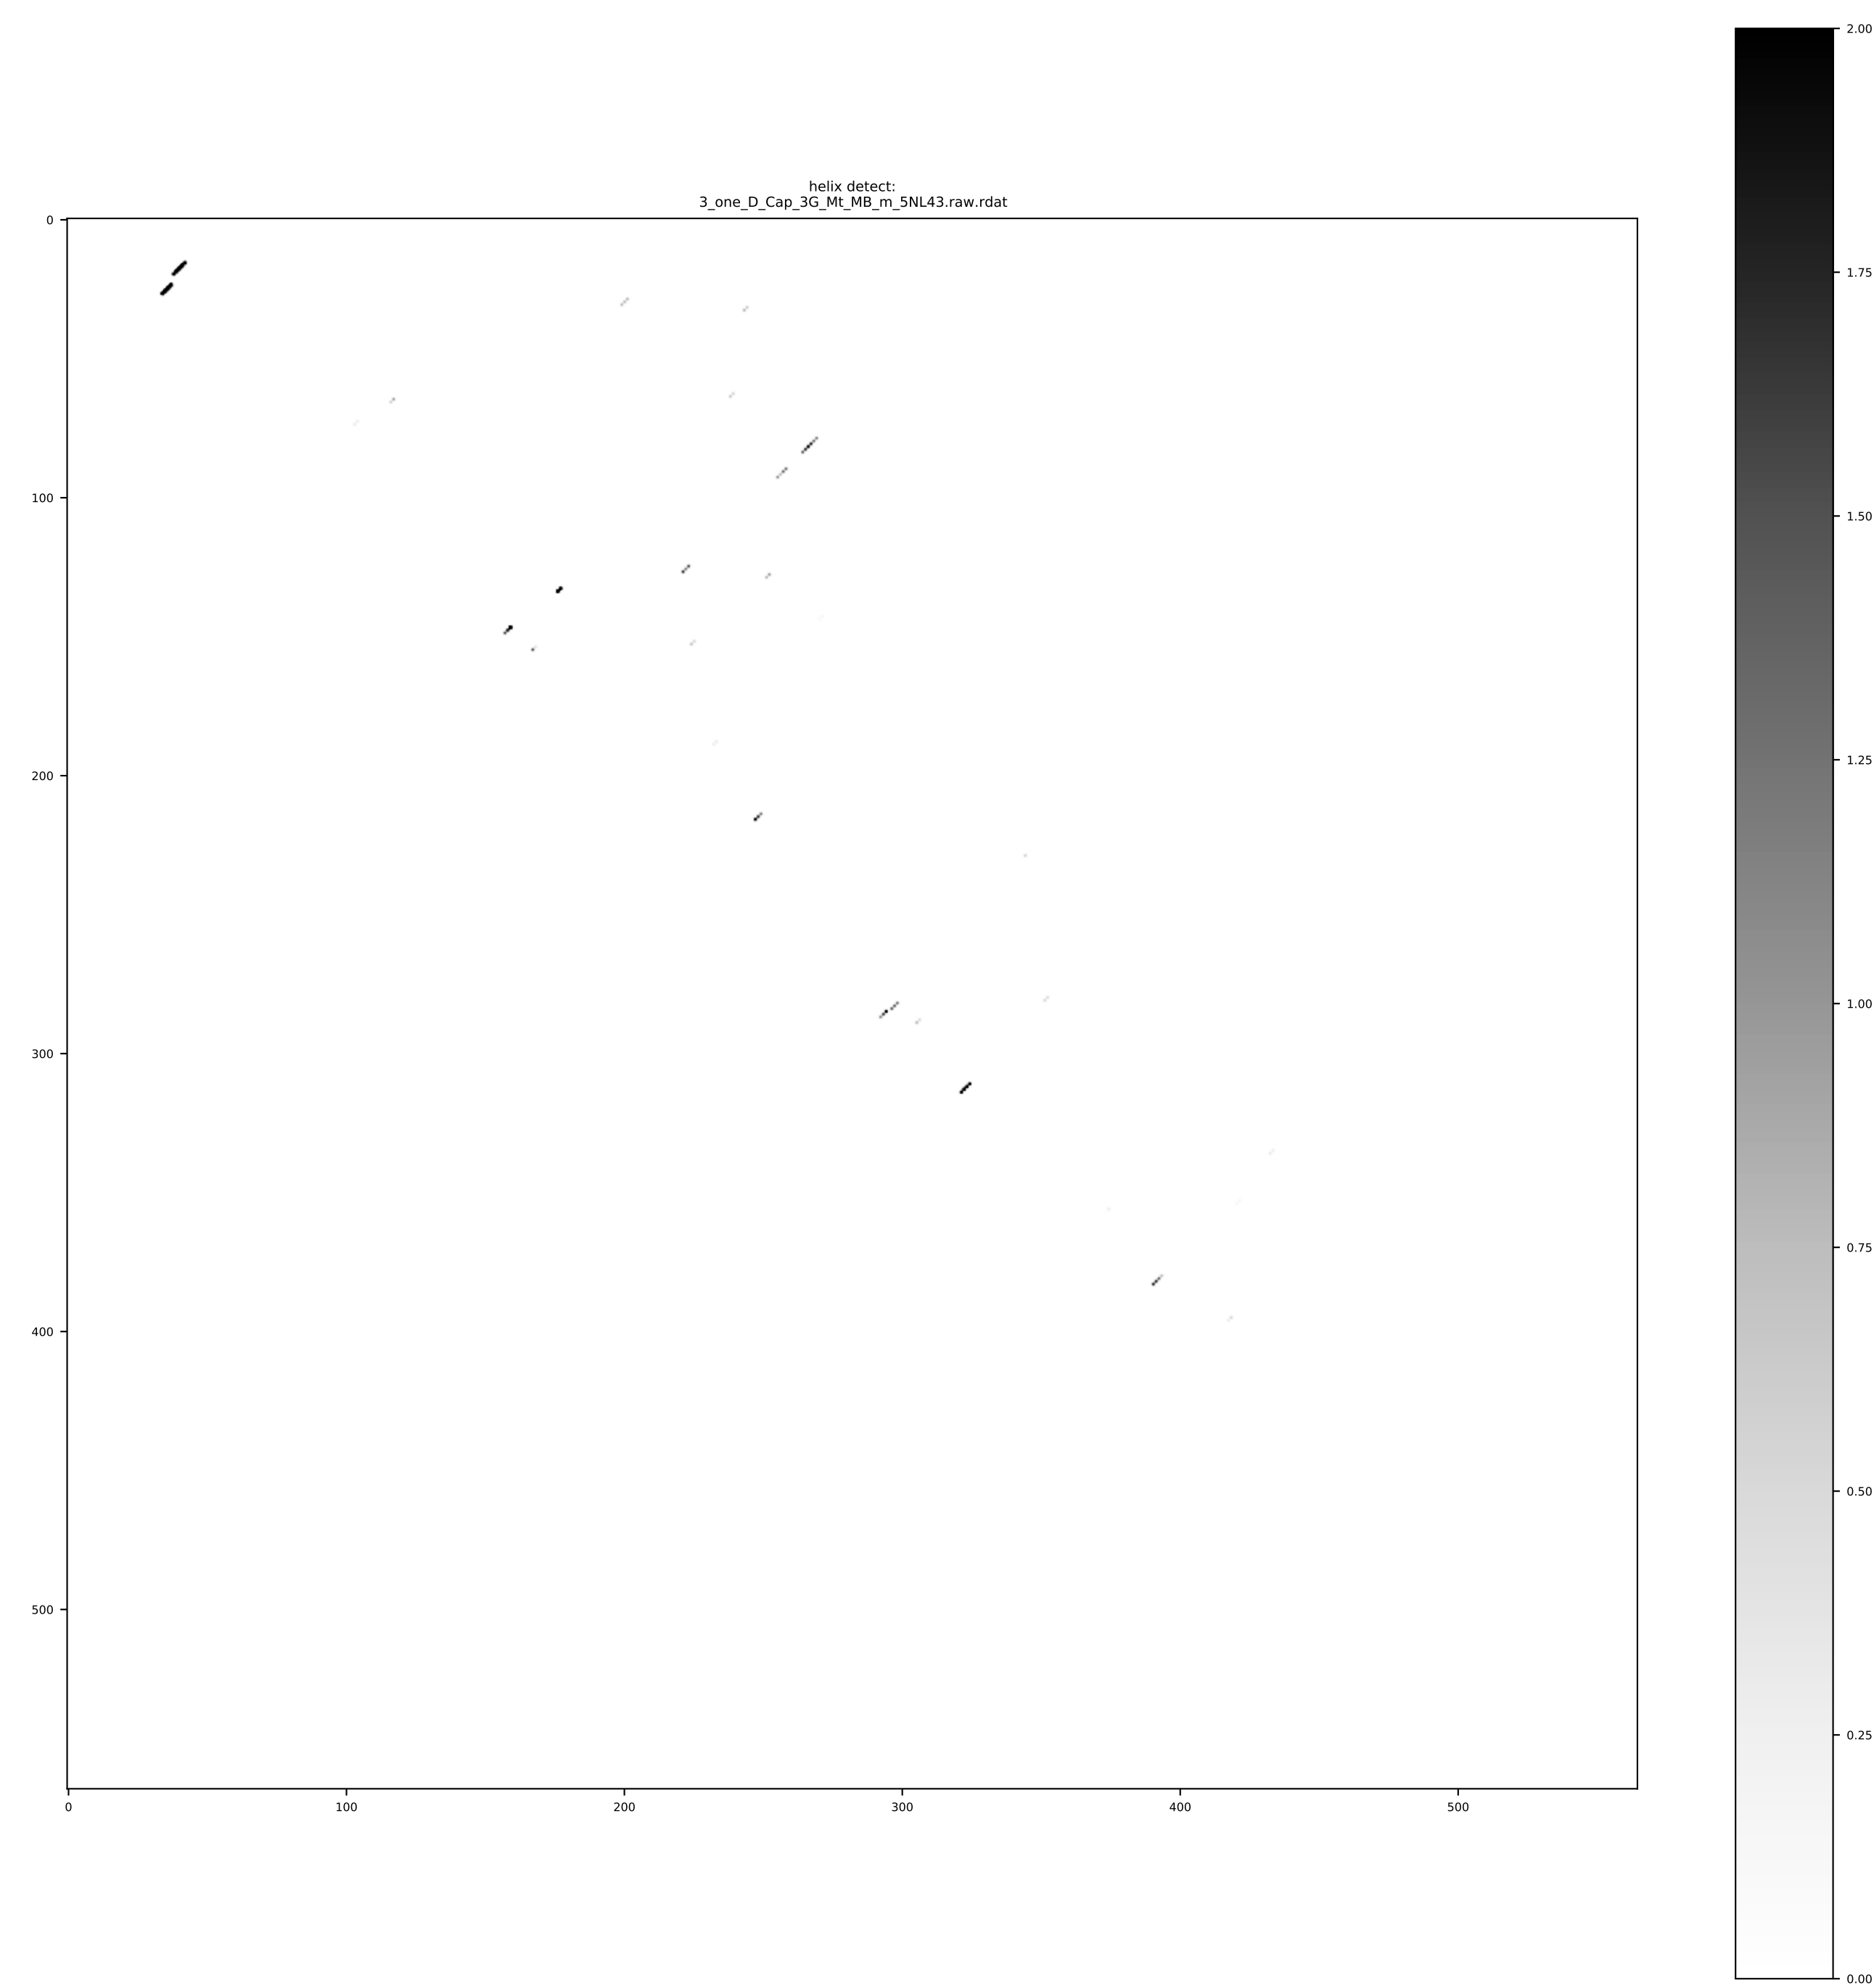

Supplement: Supplementary file 14 [file threeG_monomer_best_helix.pdf › 2d-structure-inference/best_helix/threeG_monomer_best_helix.pdf]

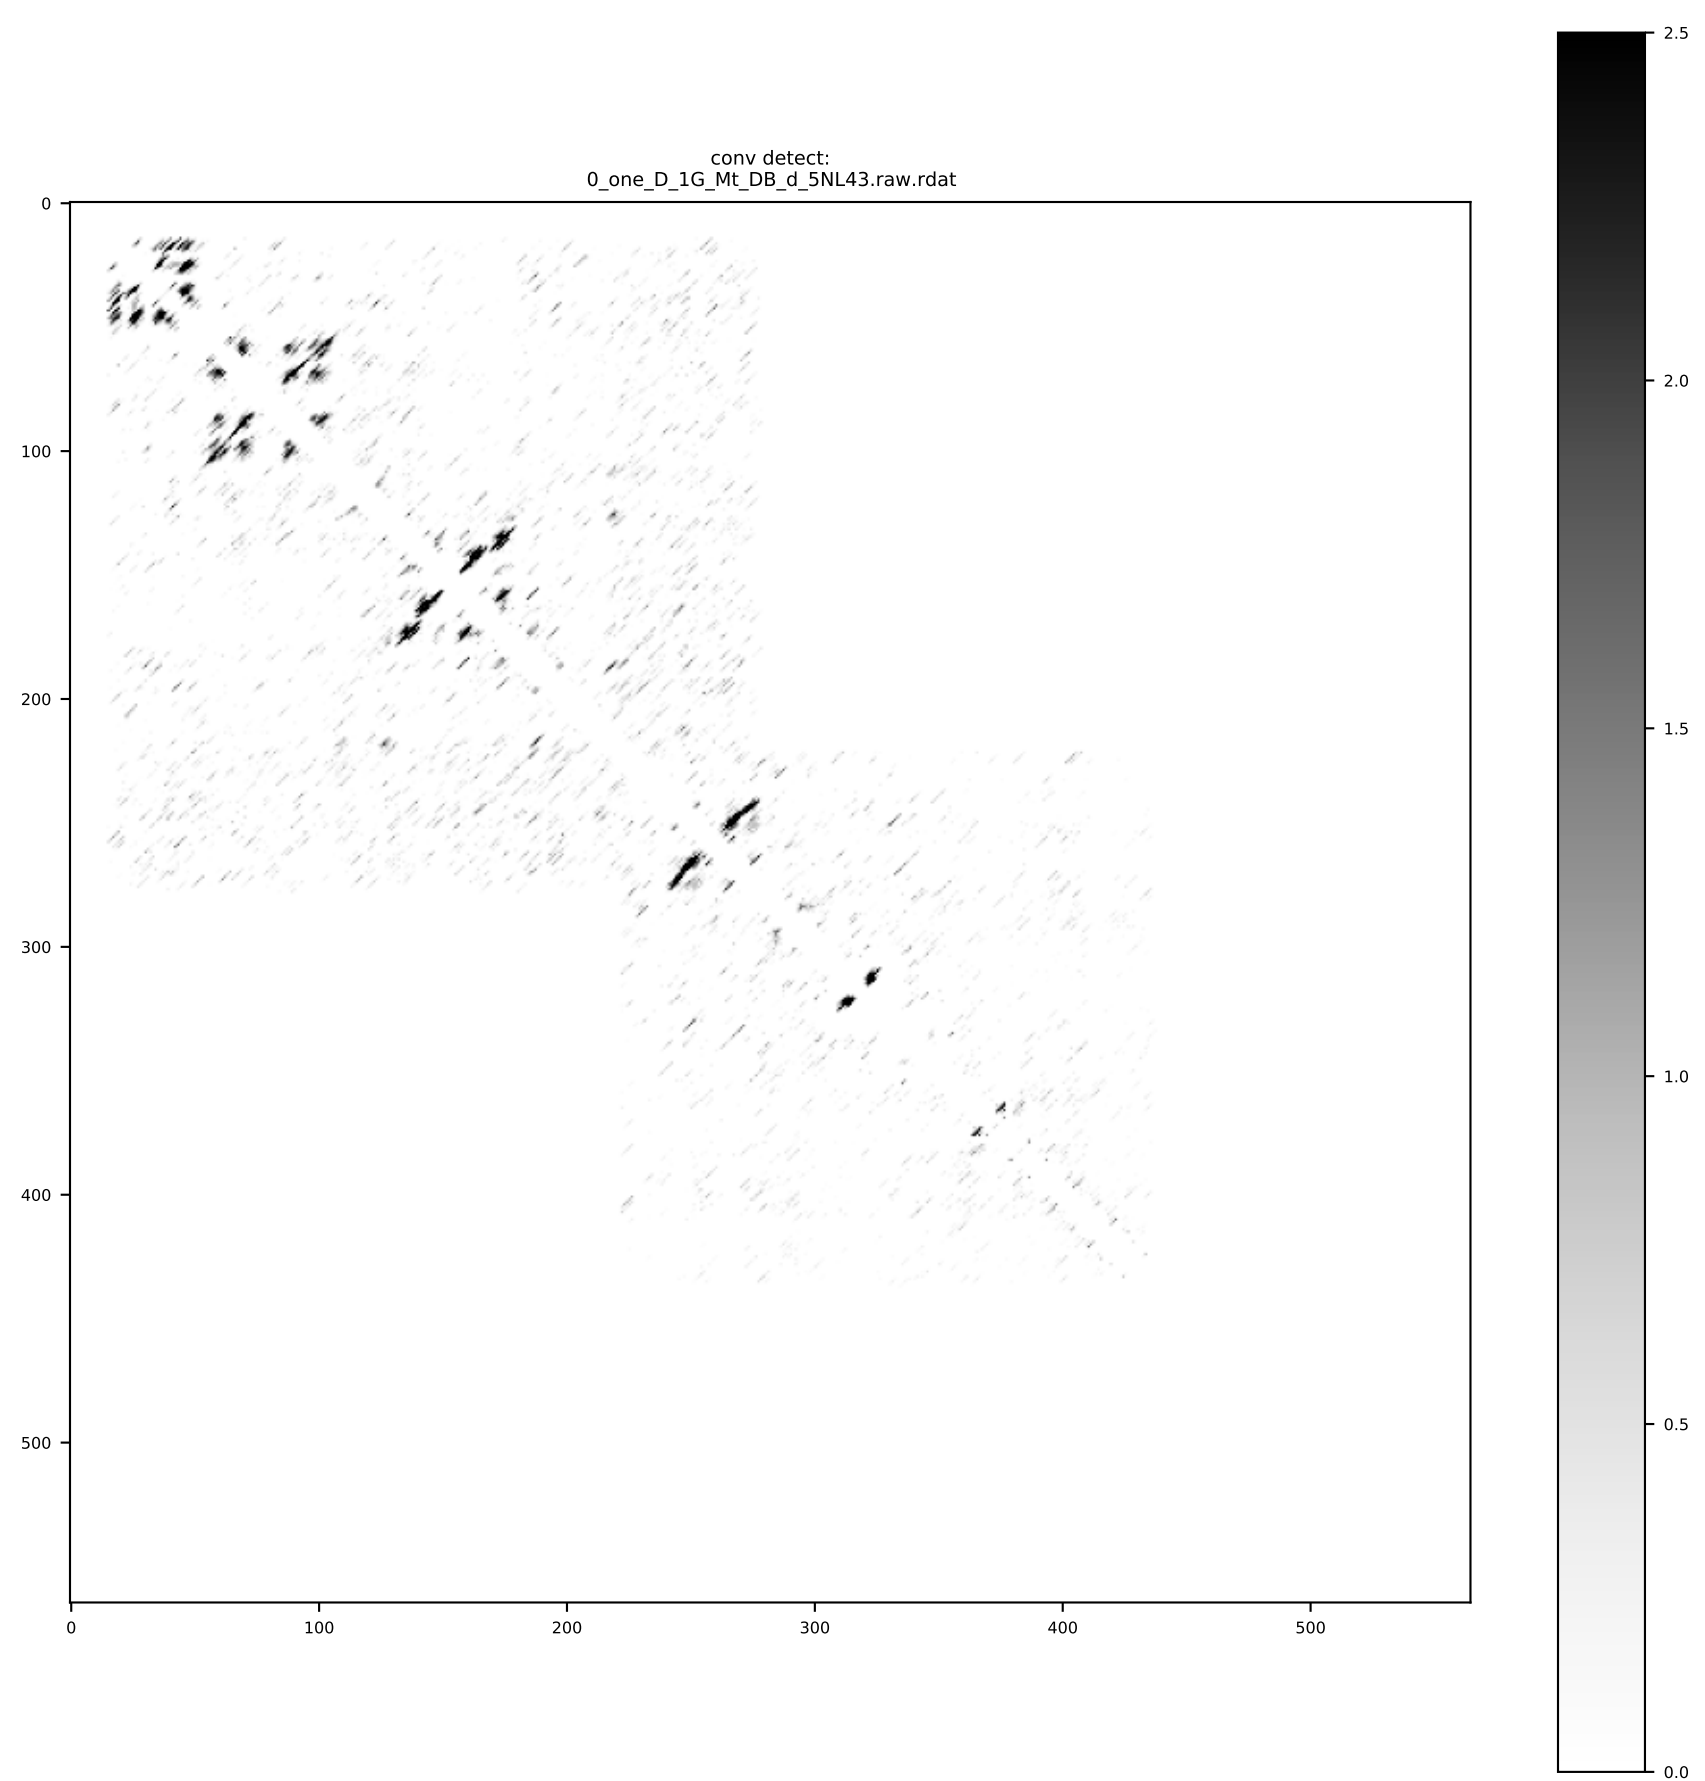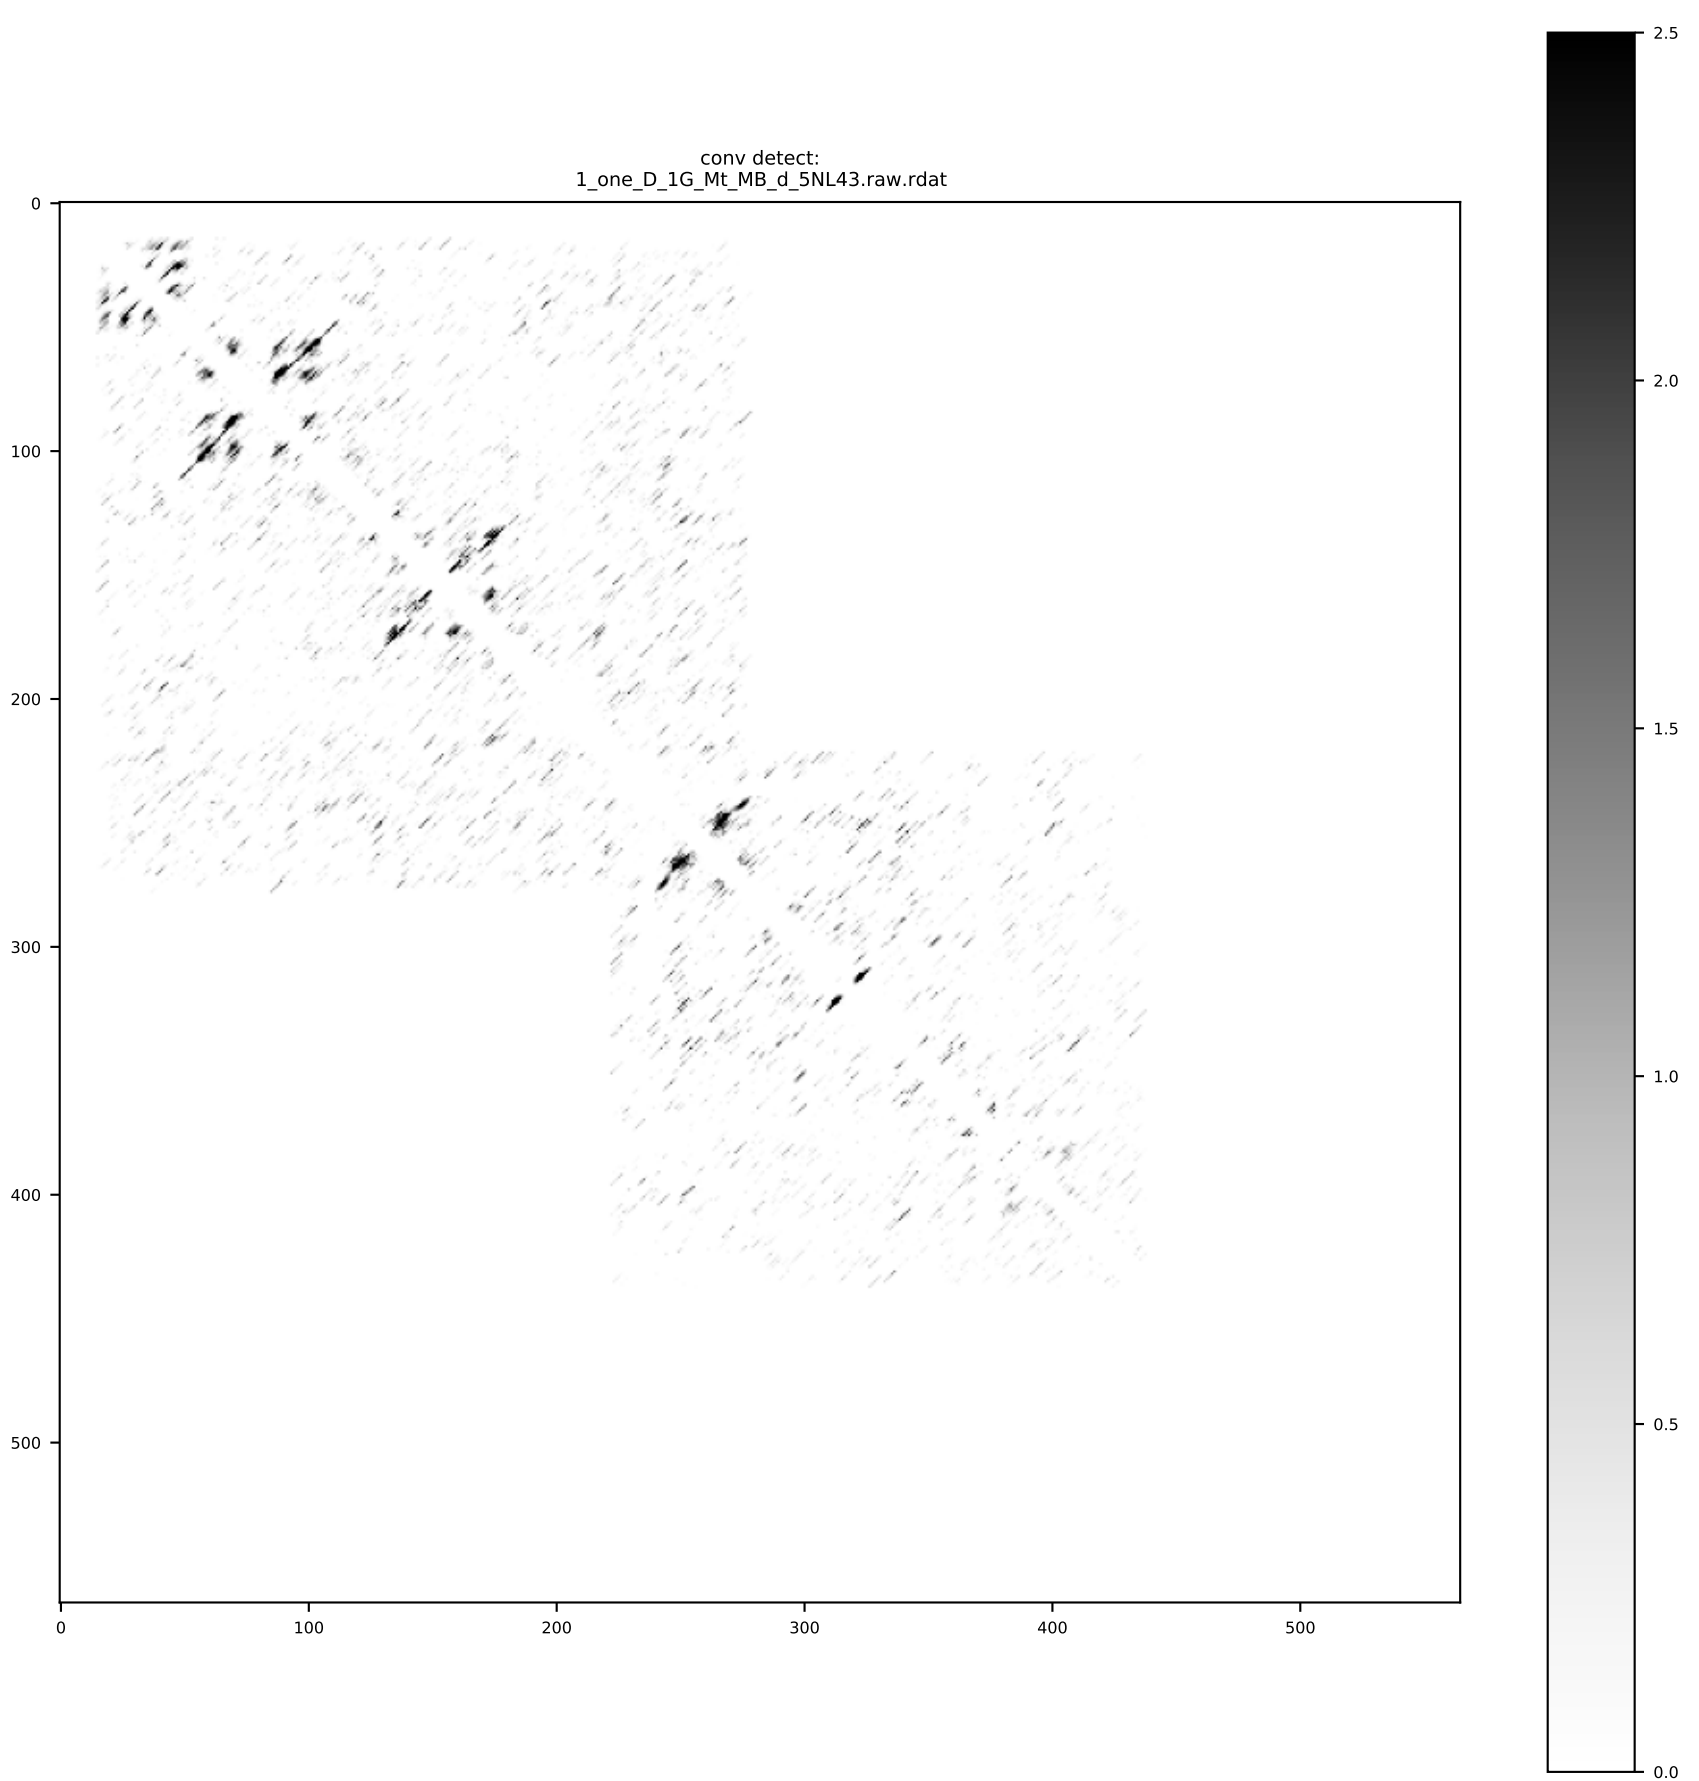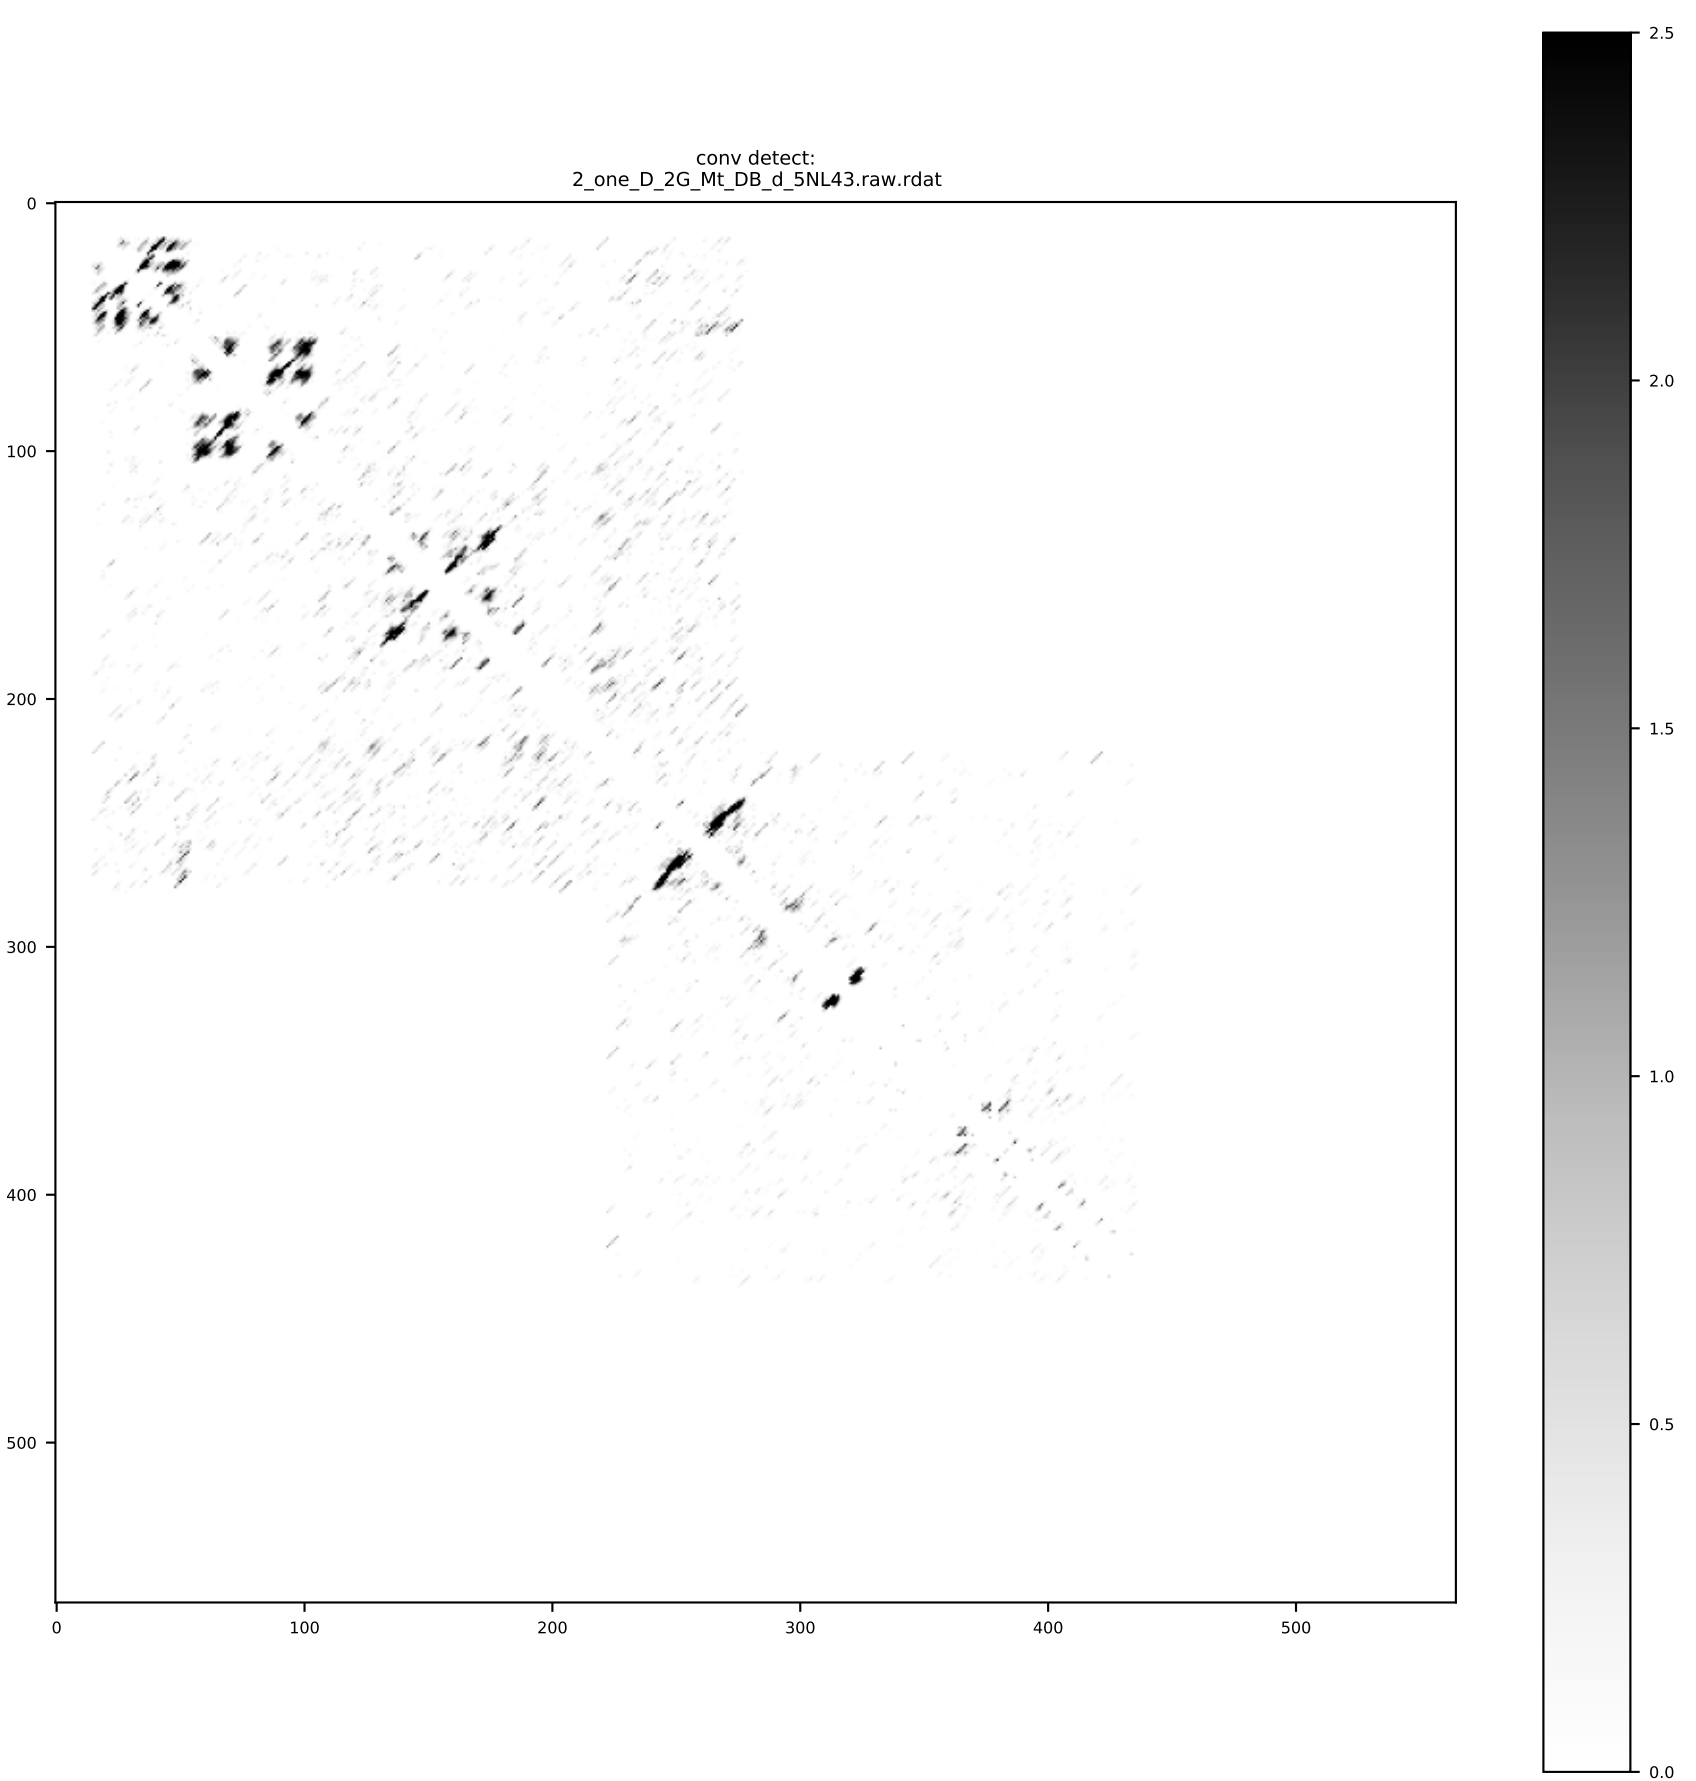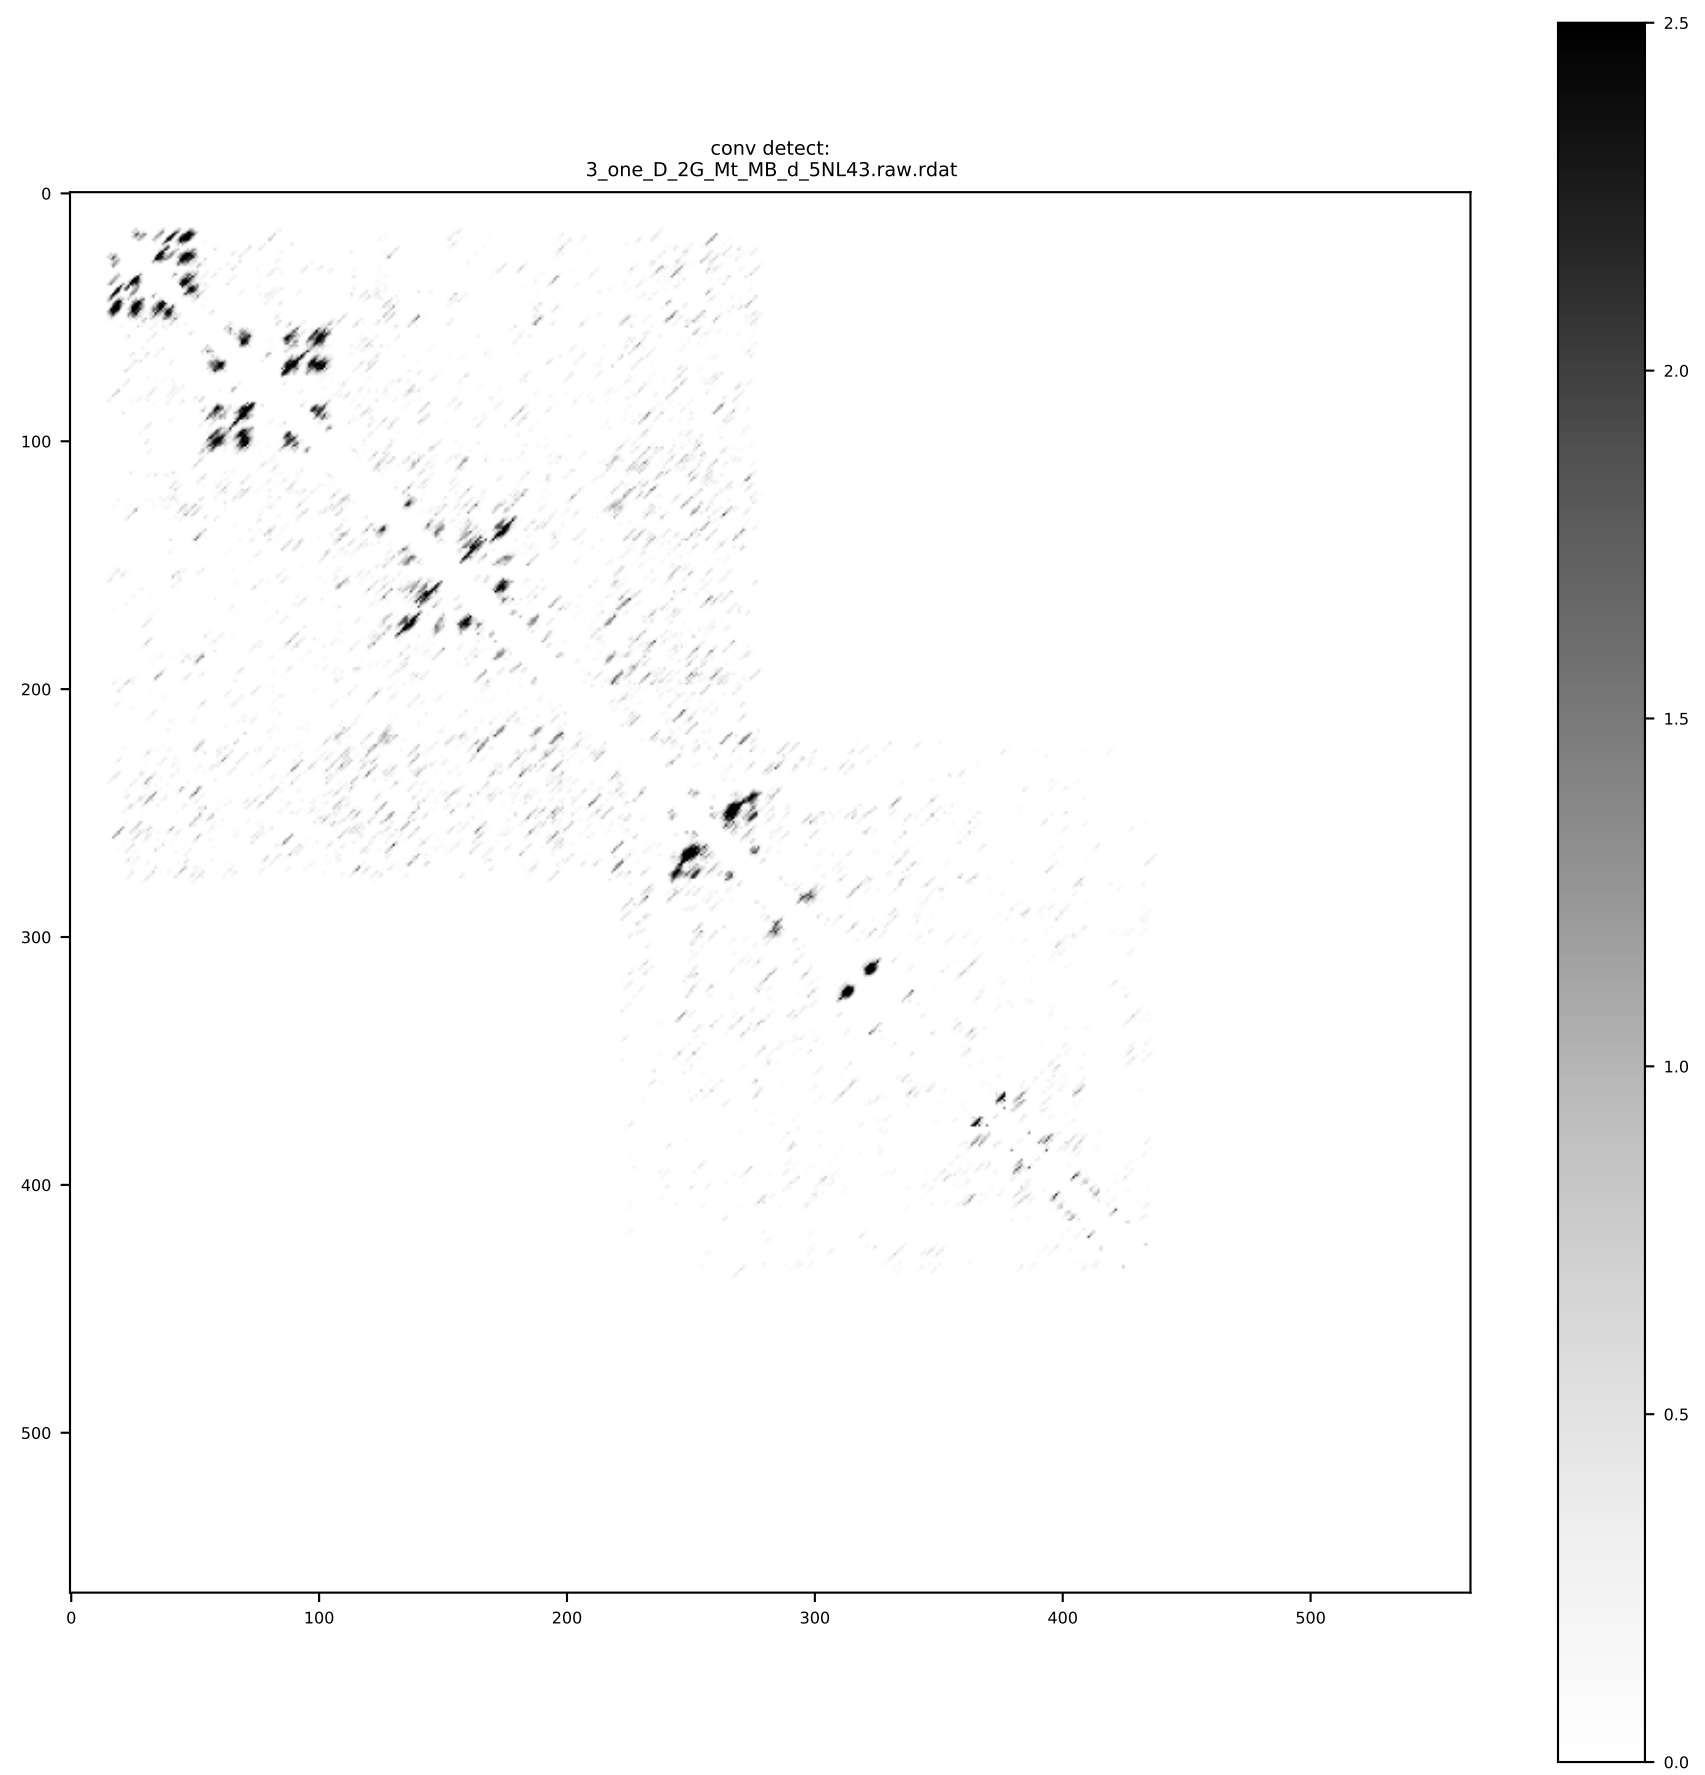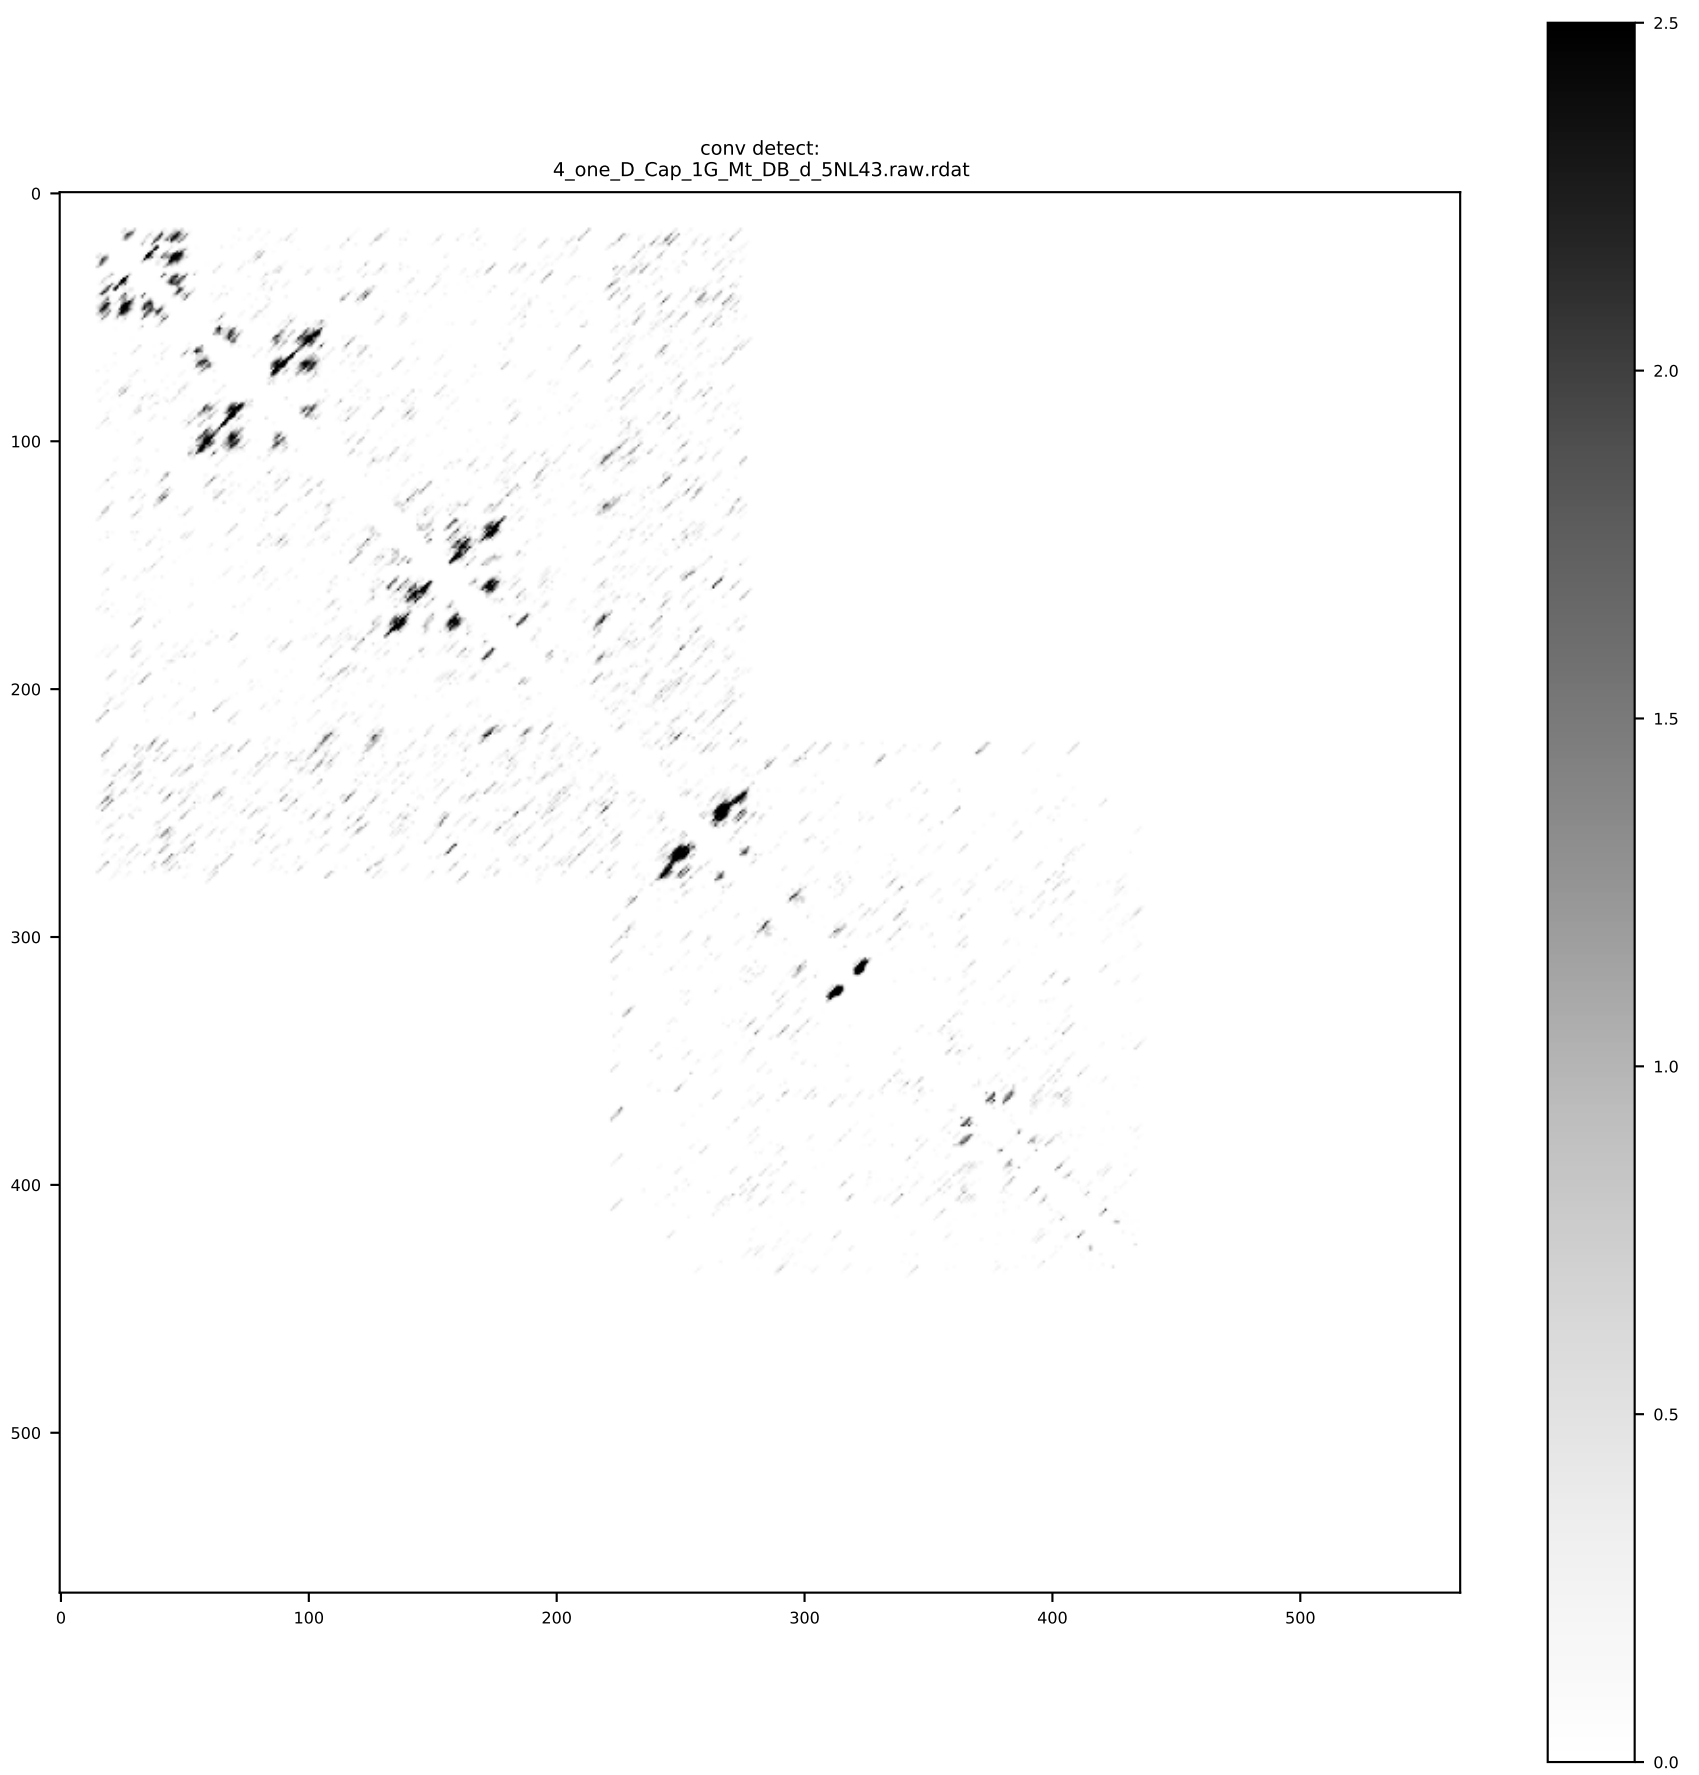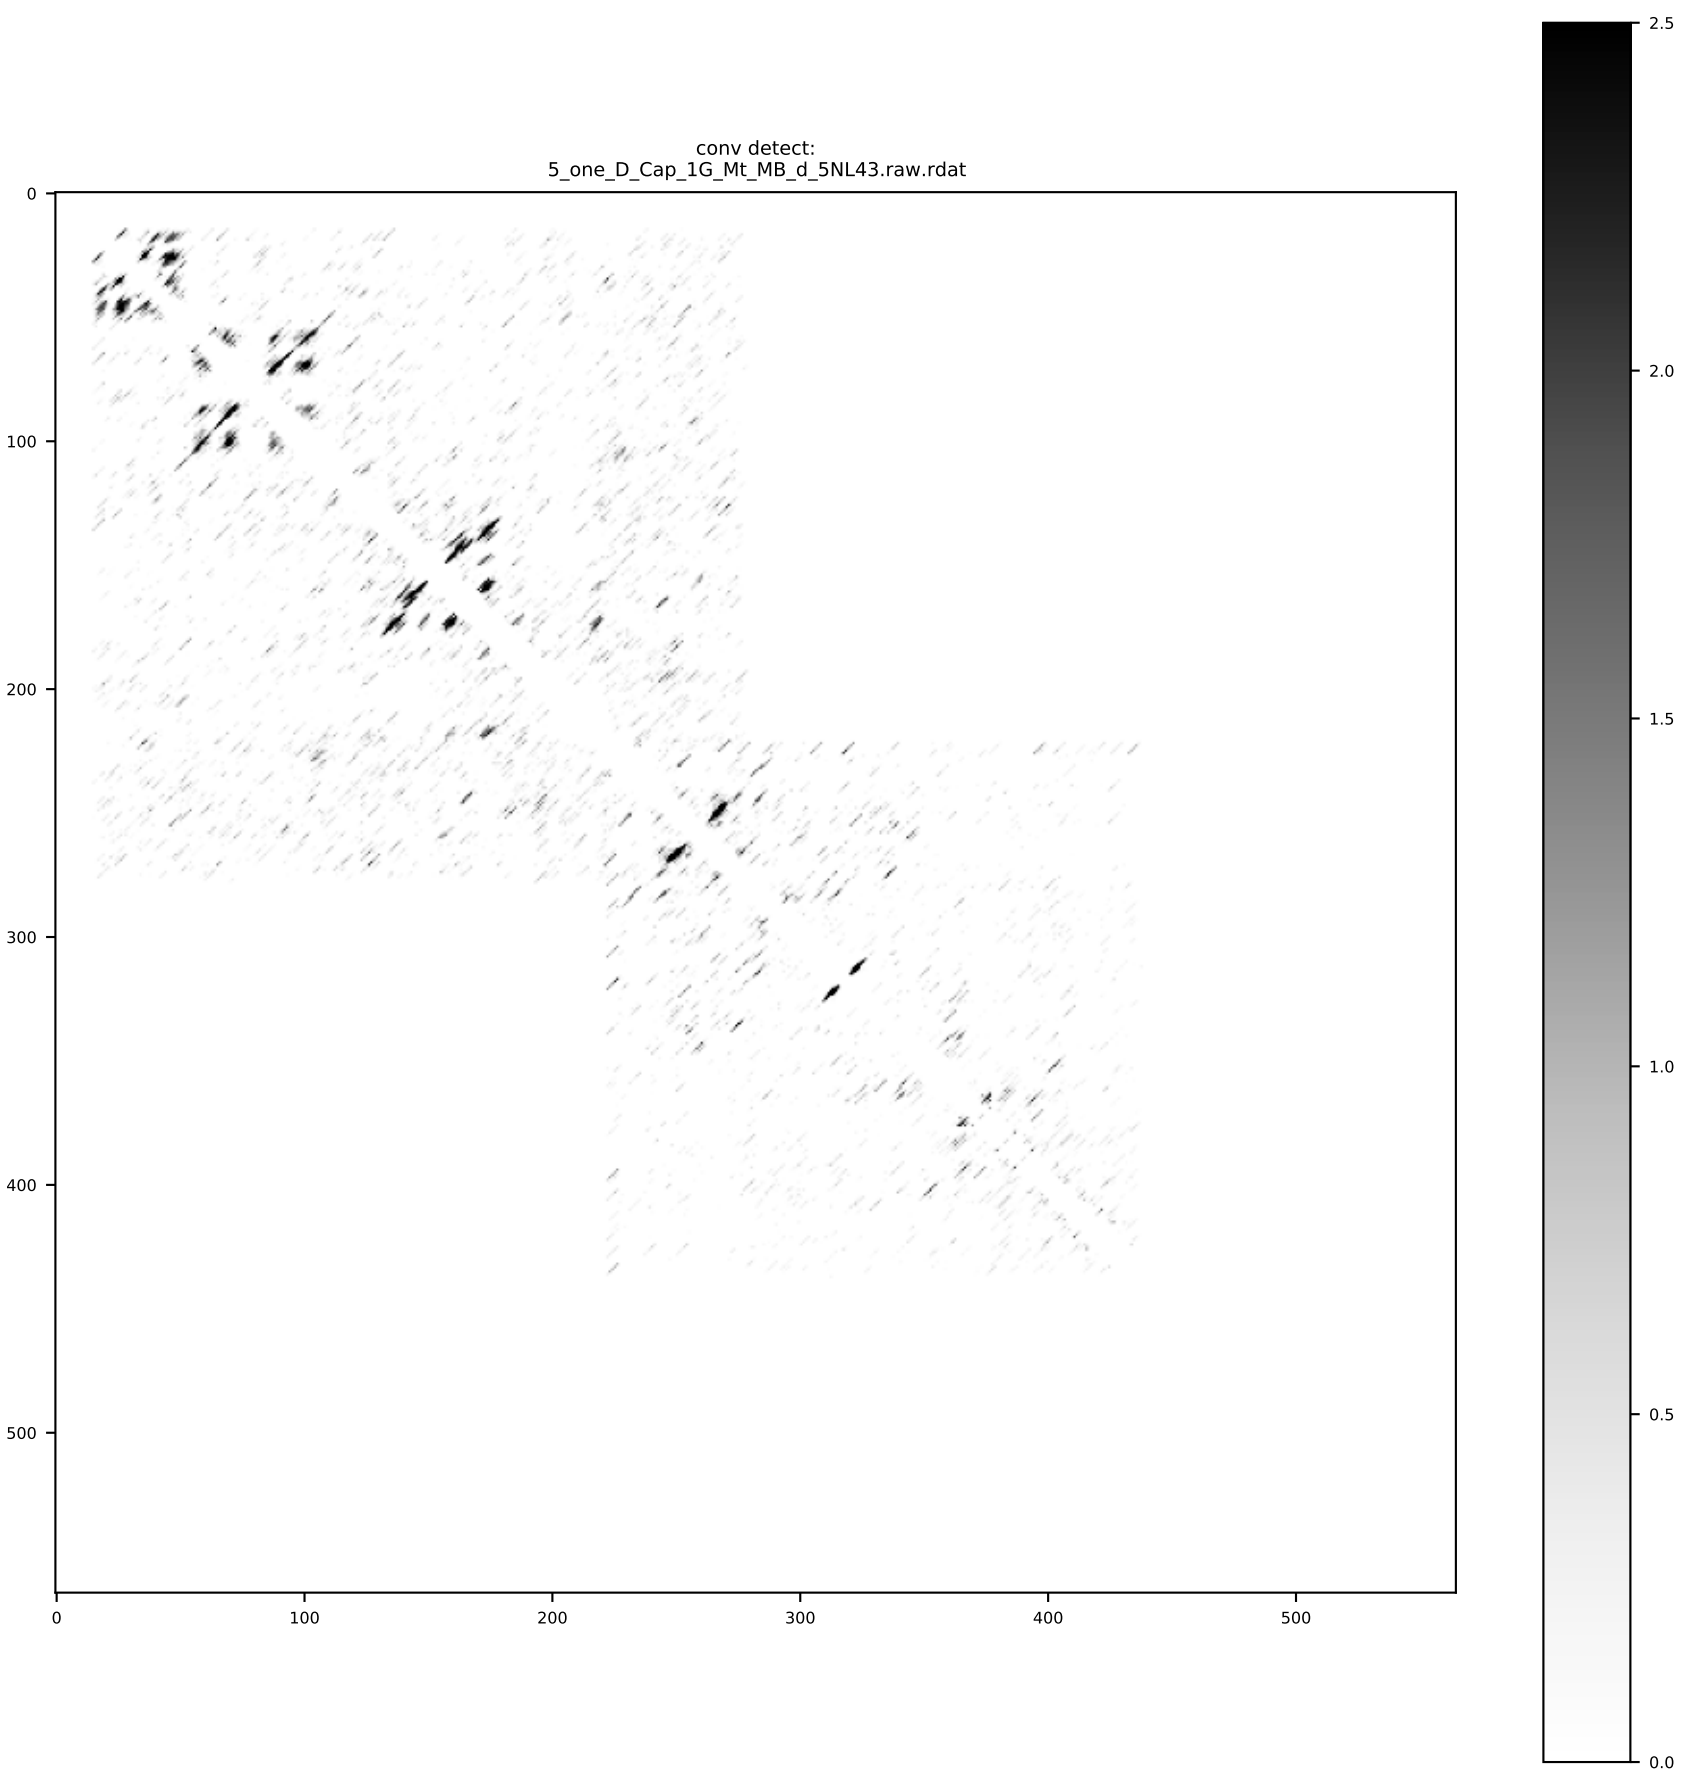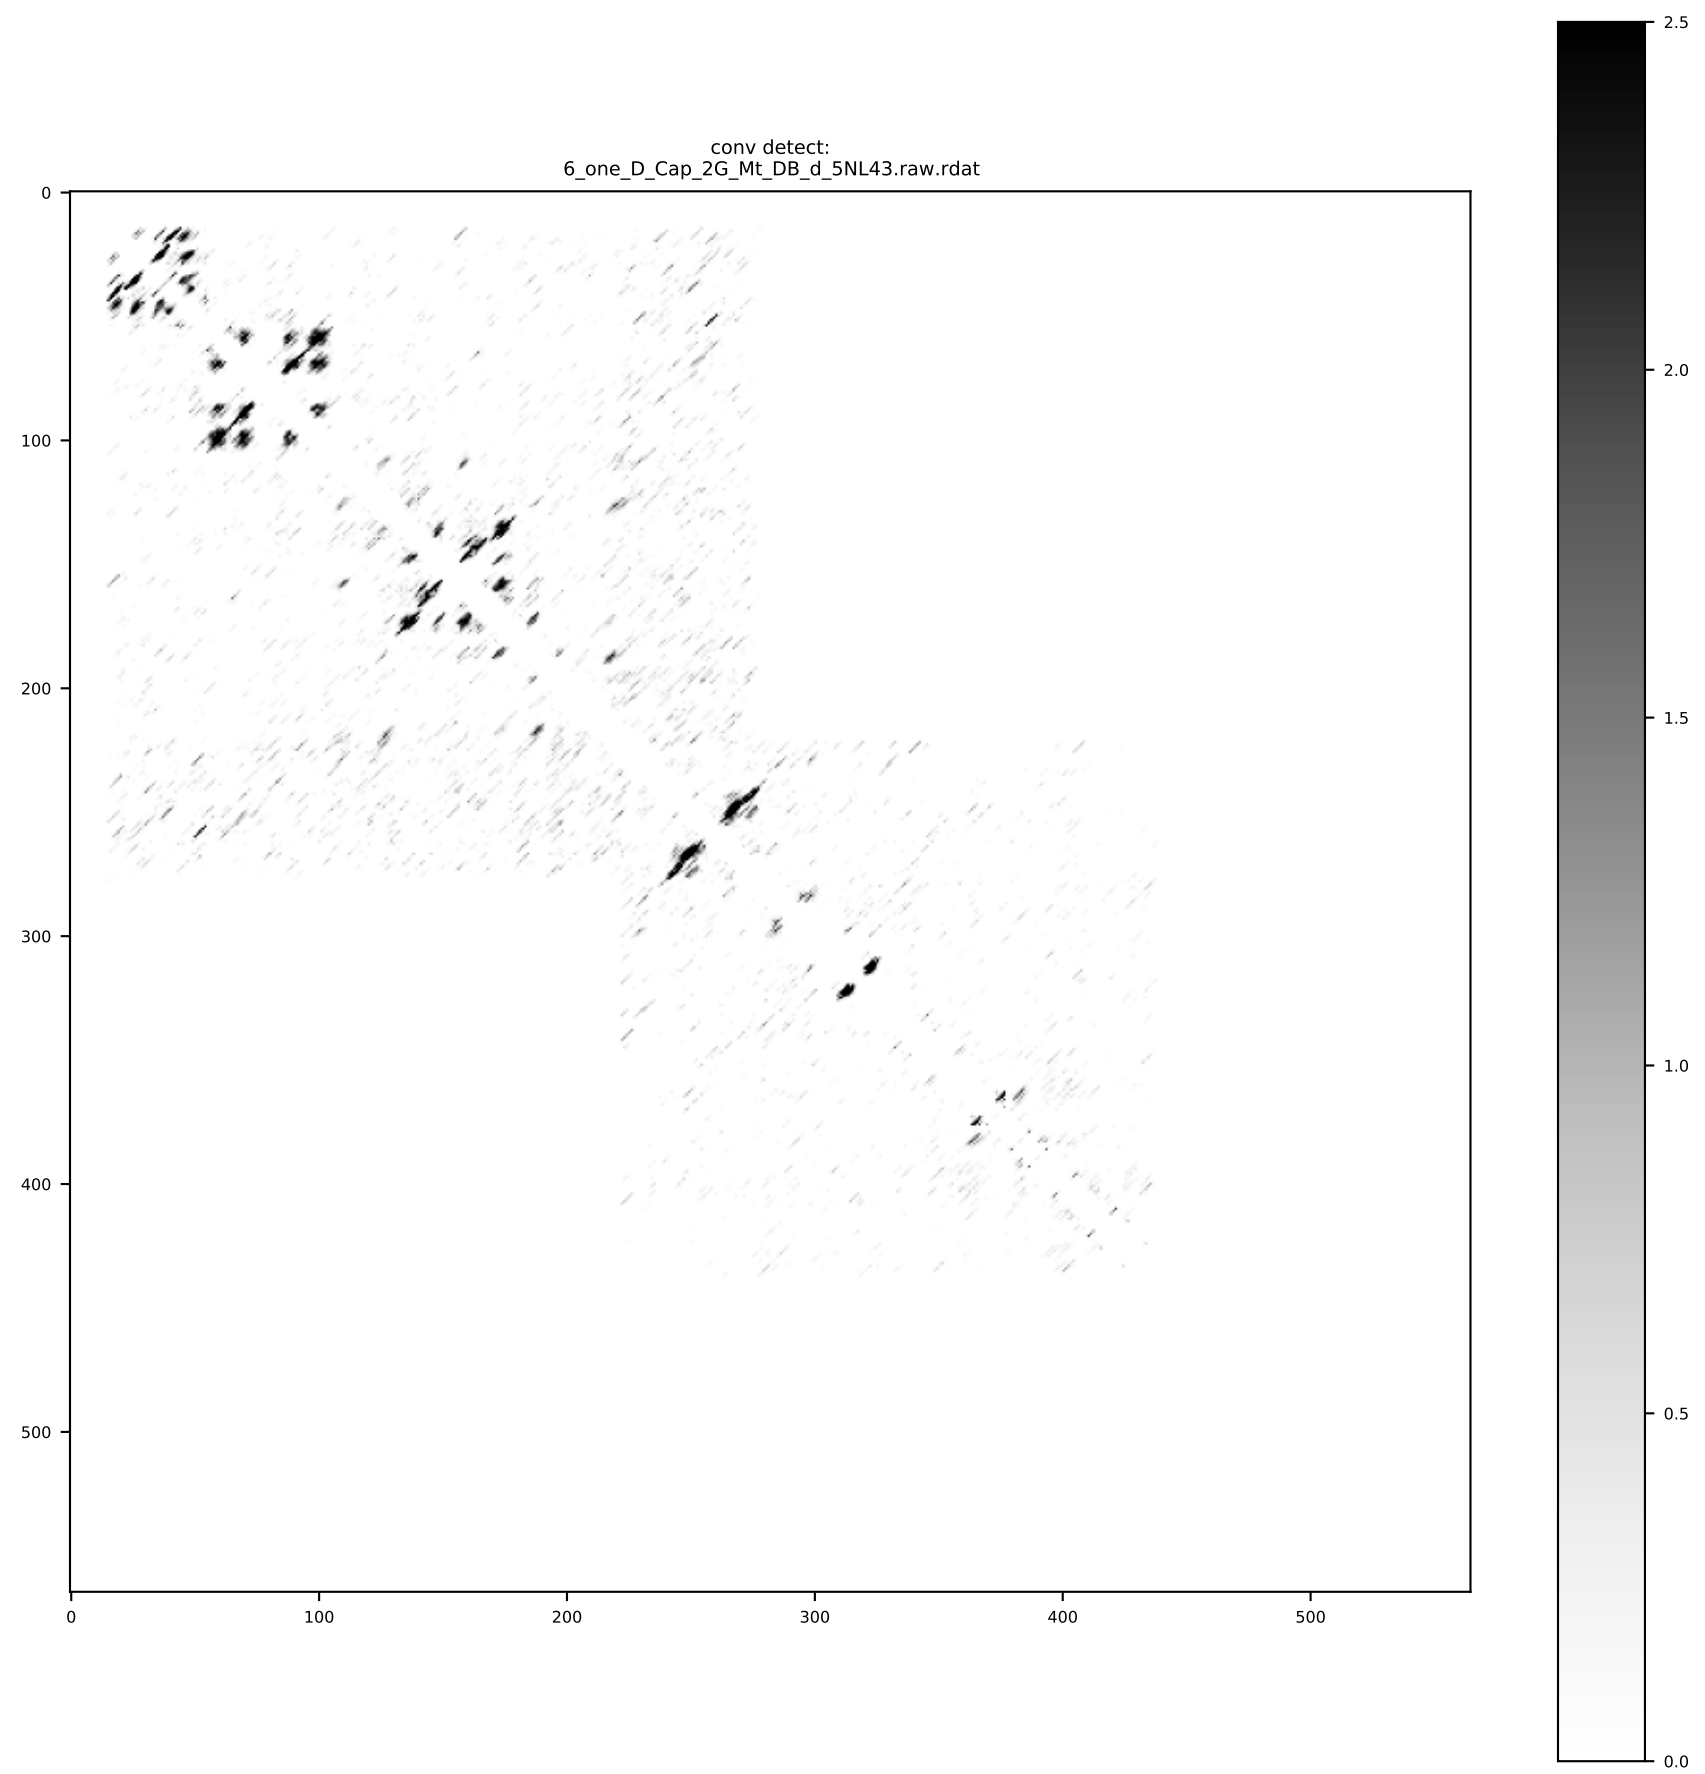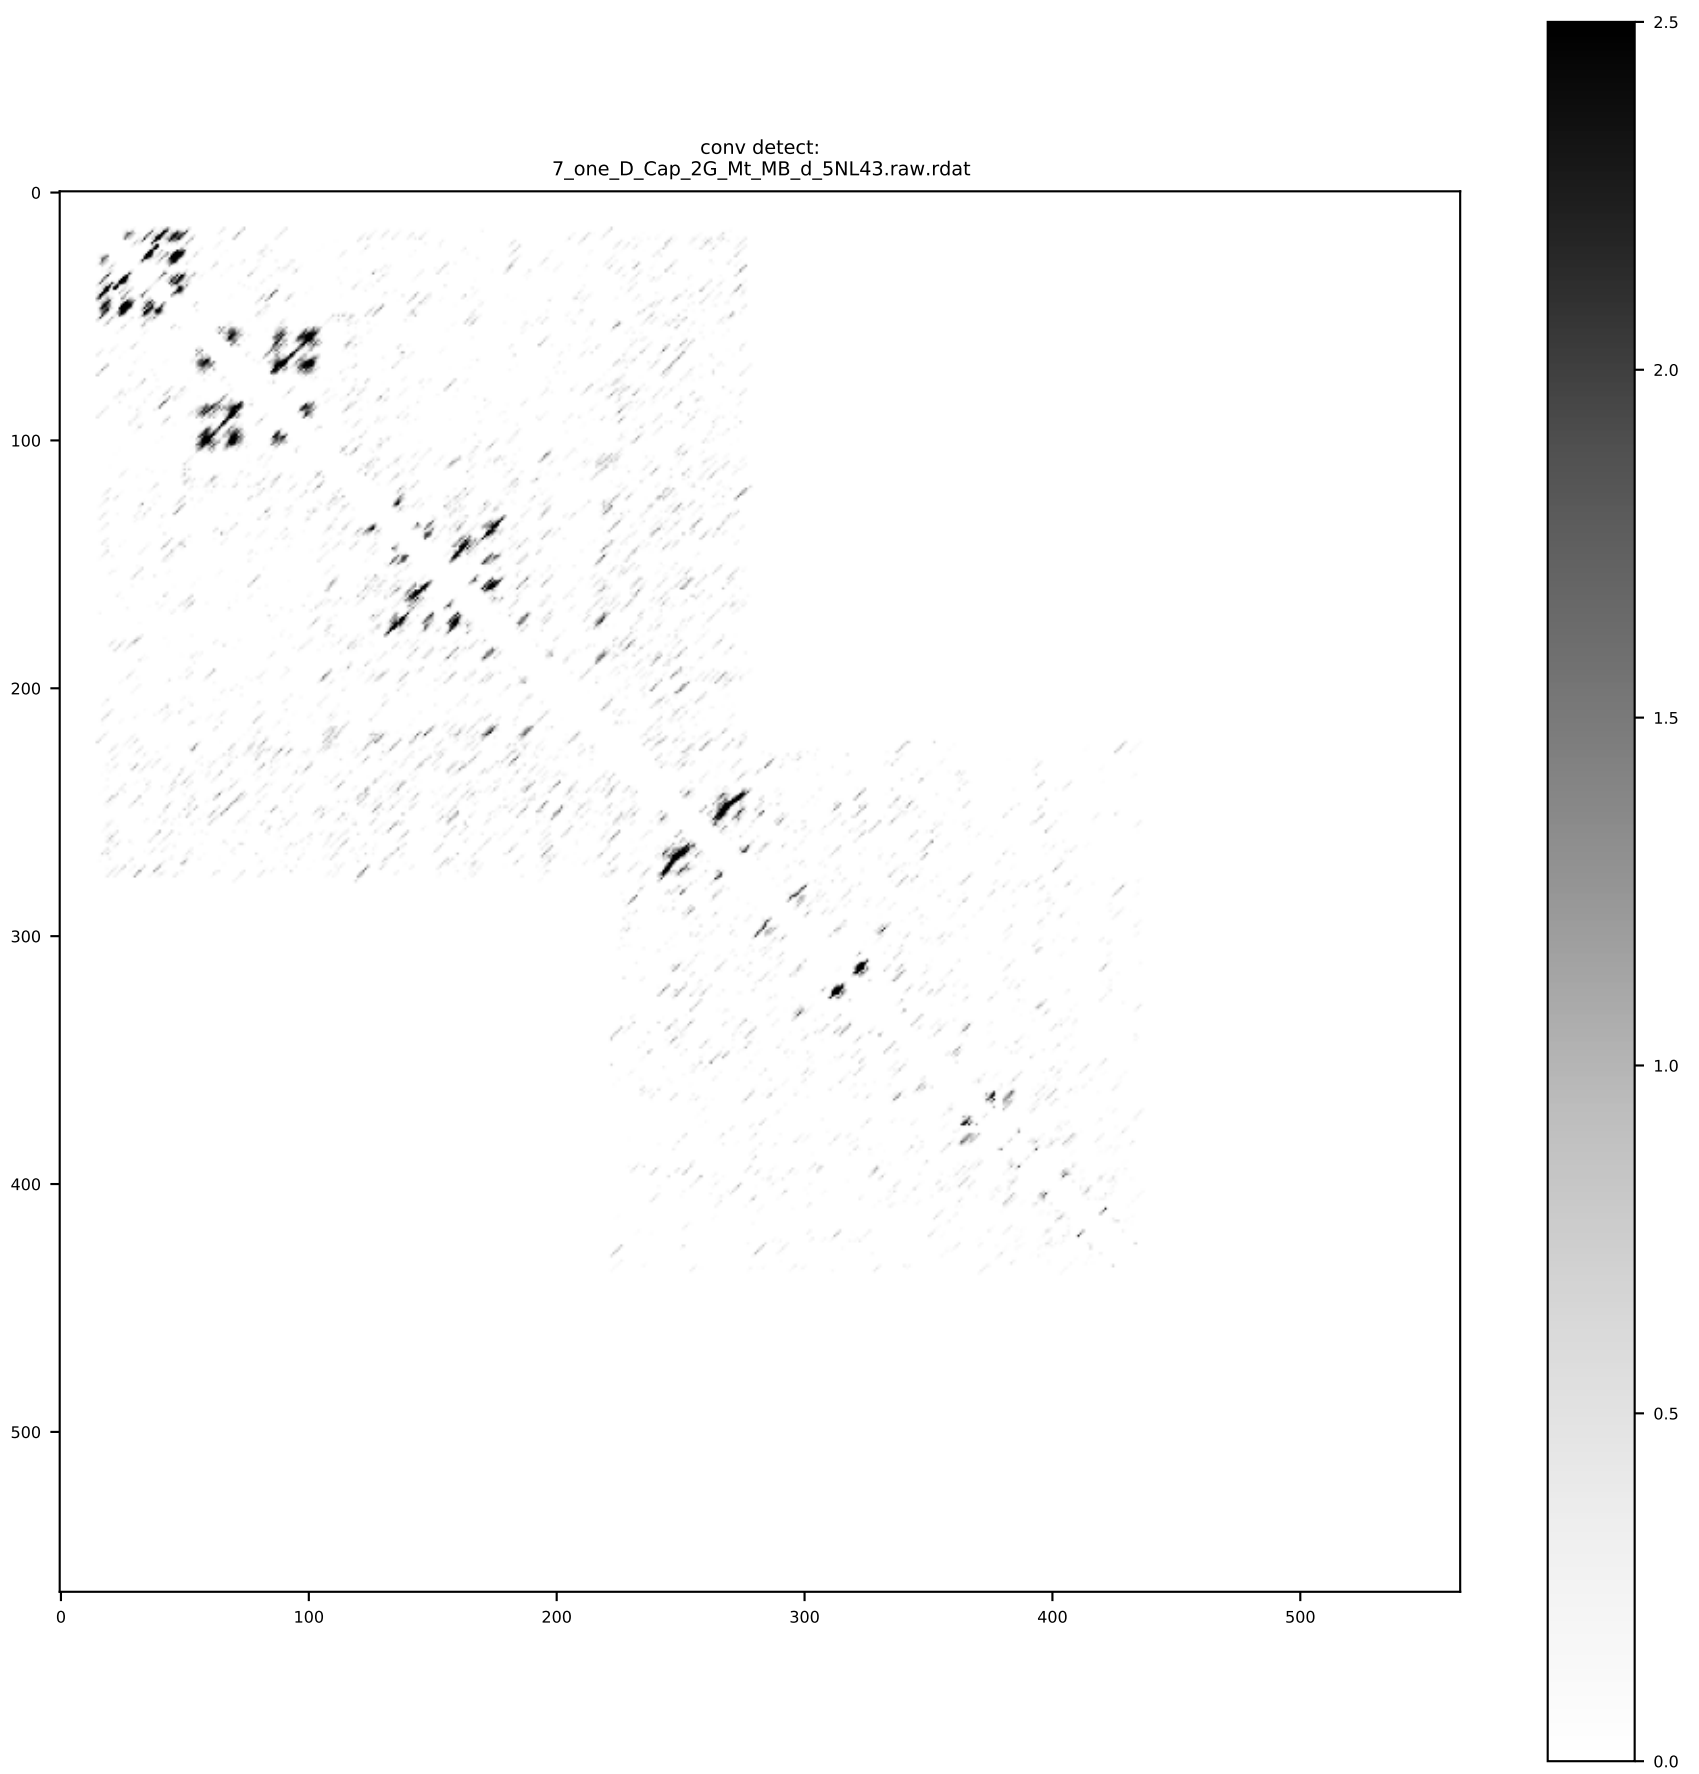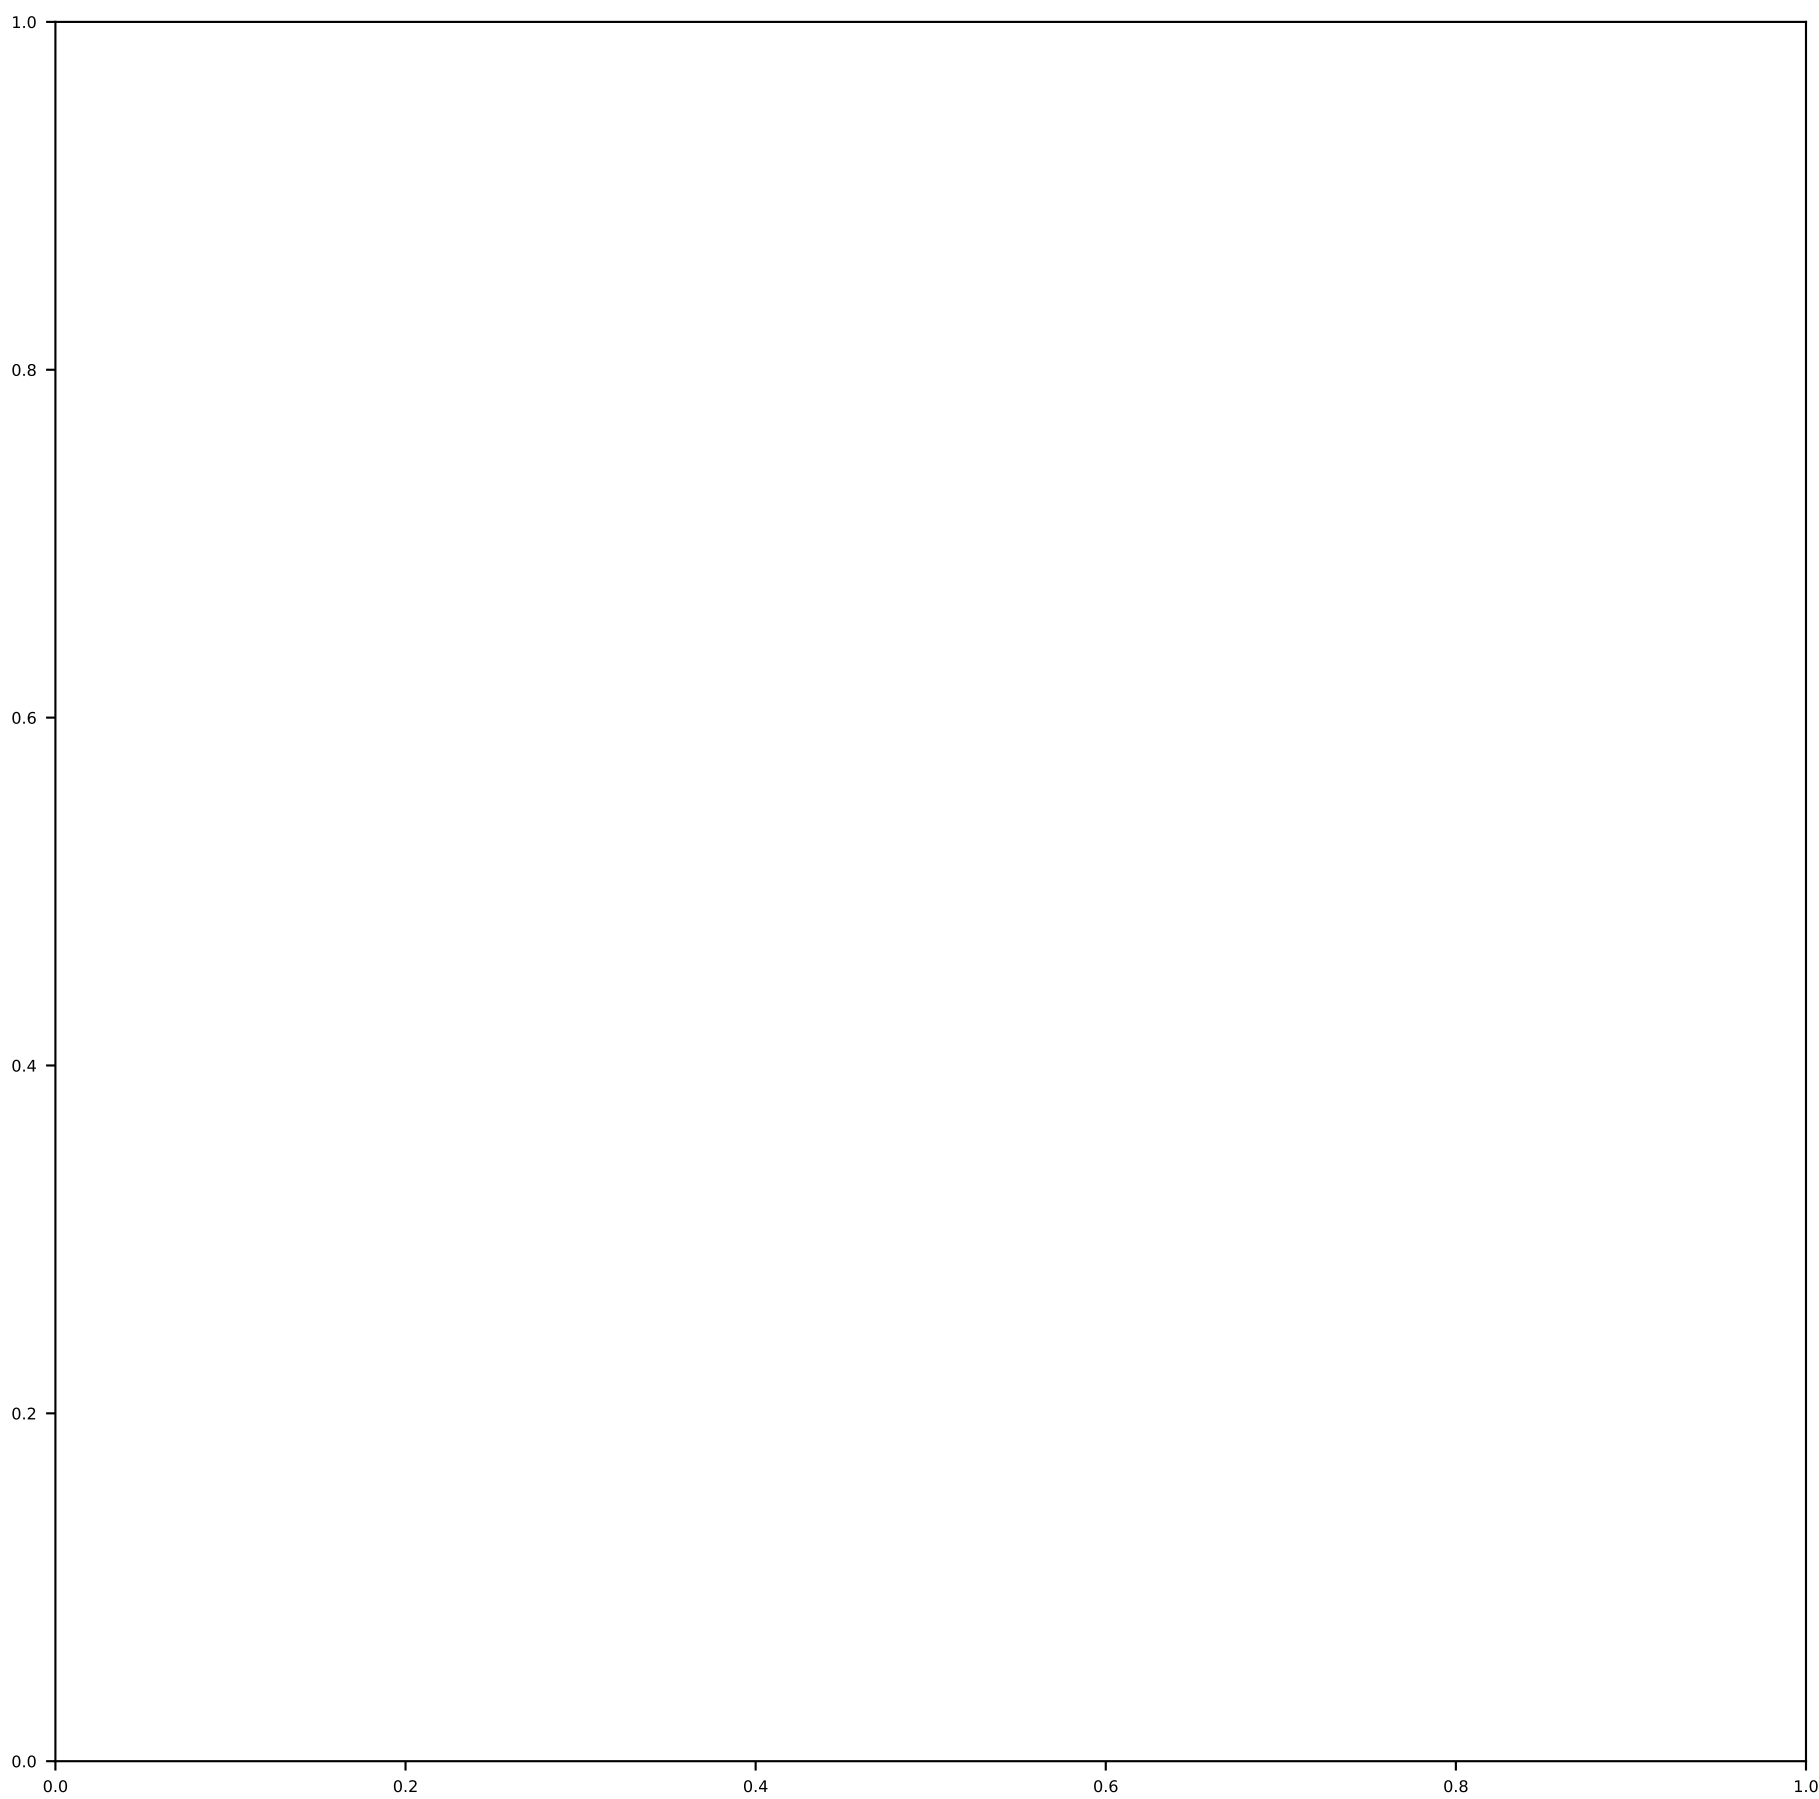

Supplement: Supplementary file 15 [file one_two_G_dimer_conv_filter.pdf › 2d-structure-inference/convolution_filtered/one_two_G_dimer_conv_filter.pdf]

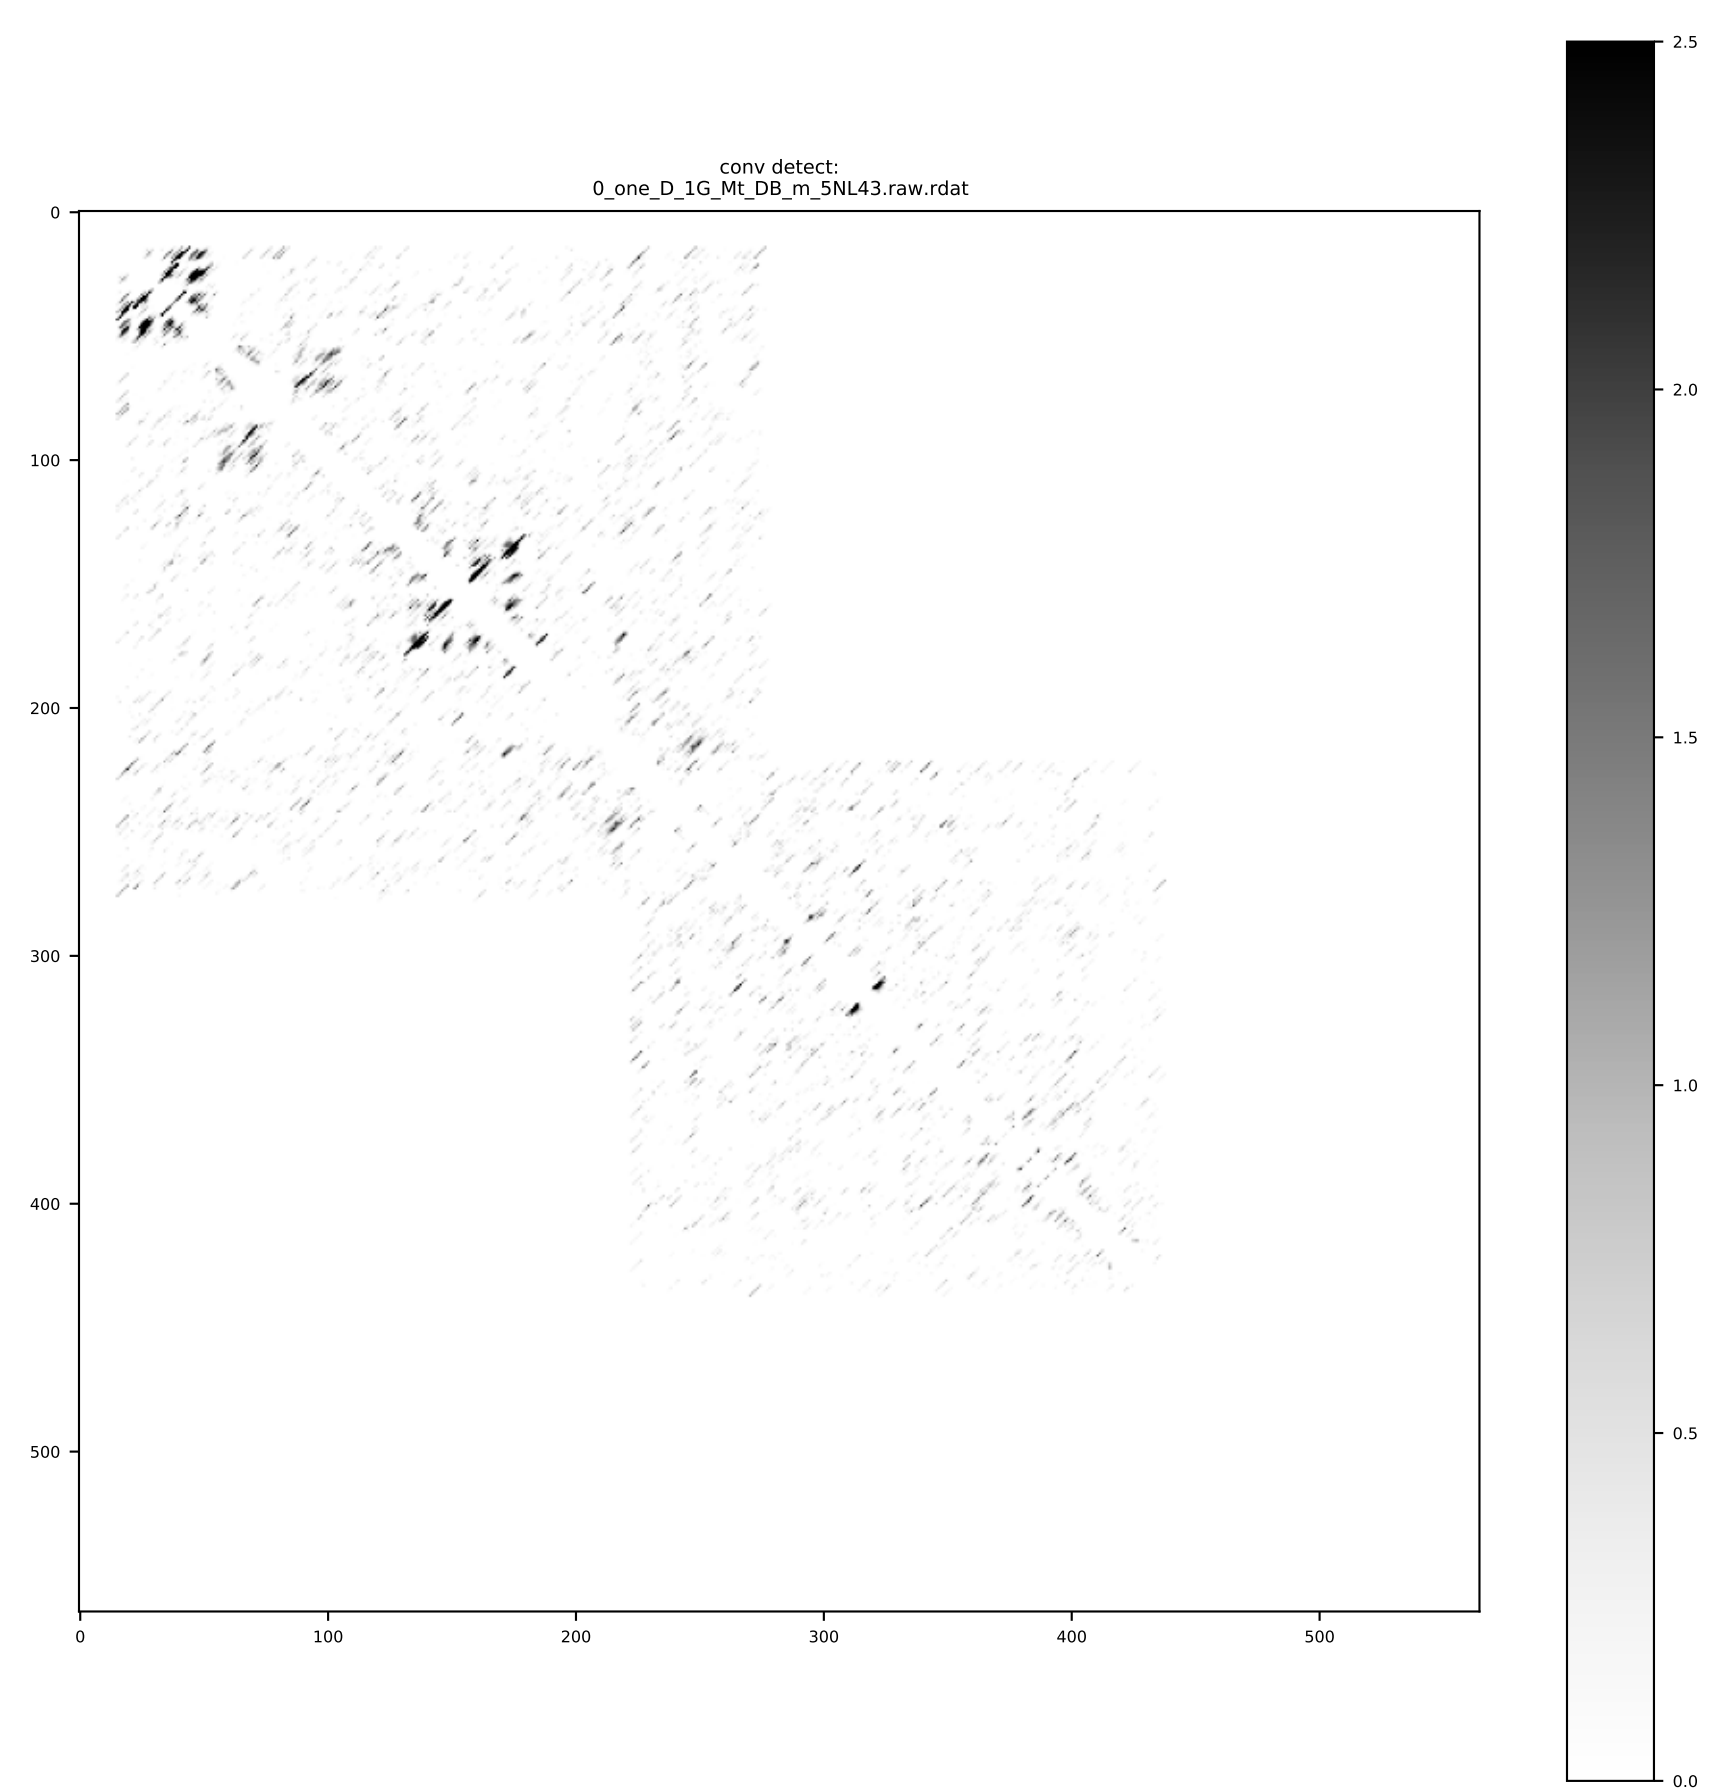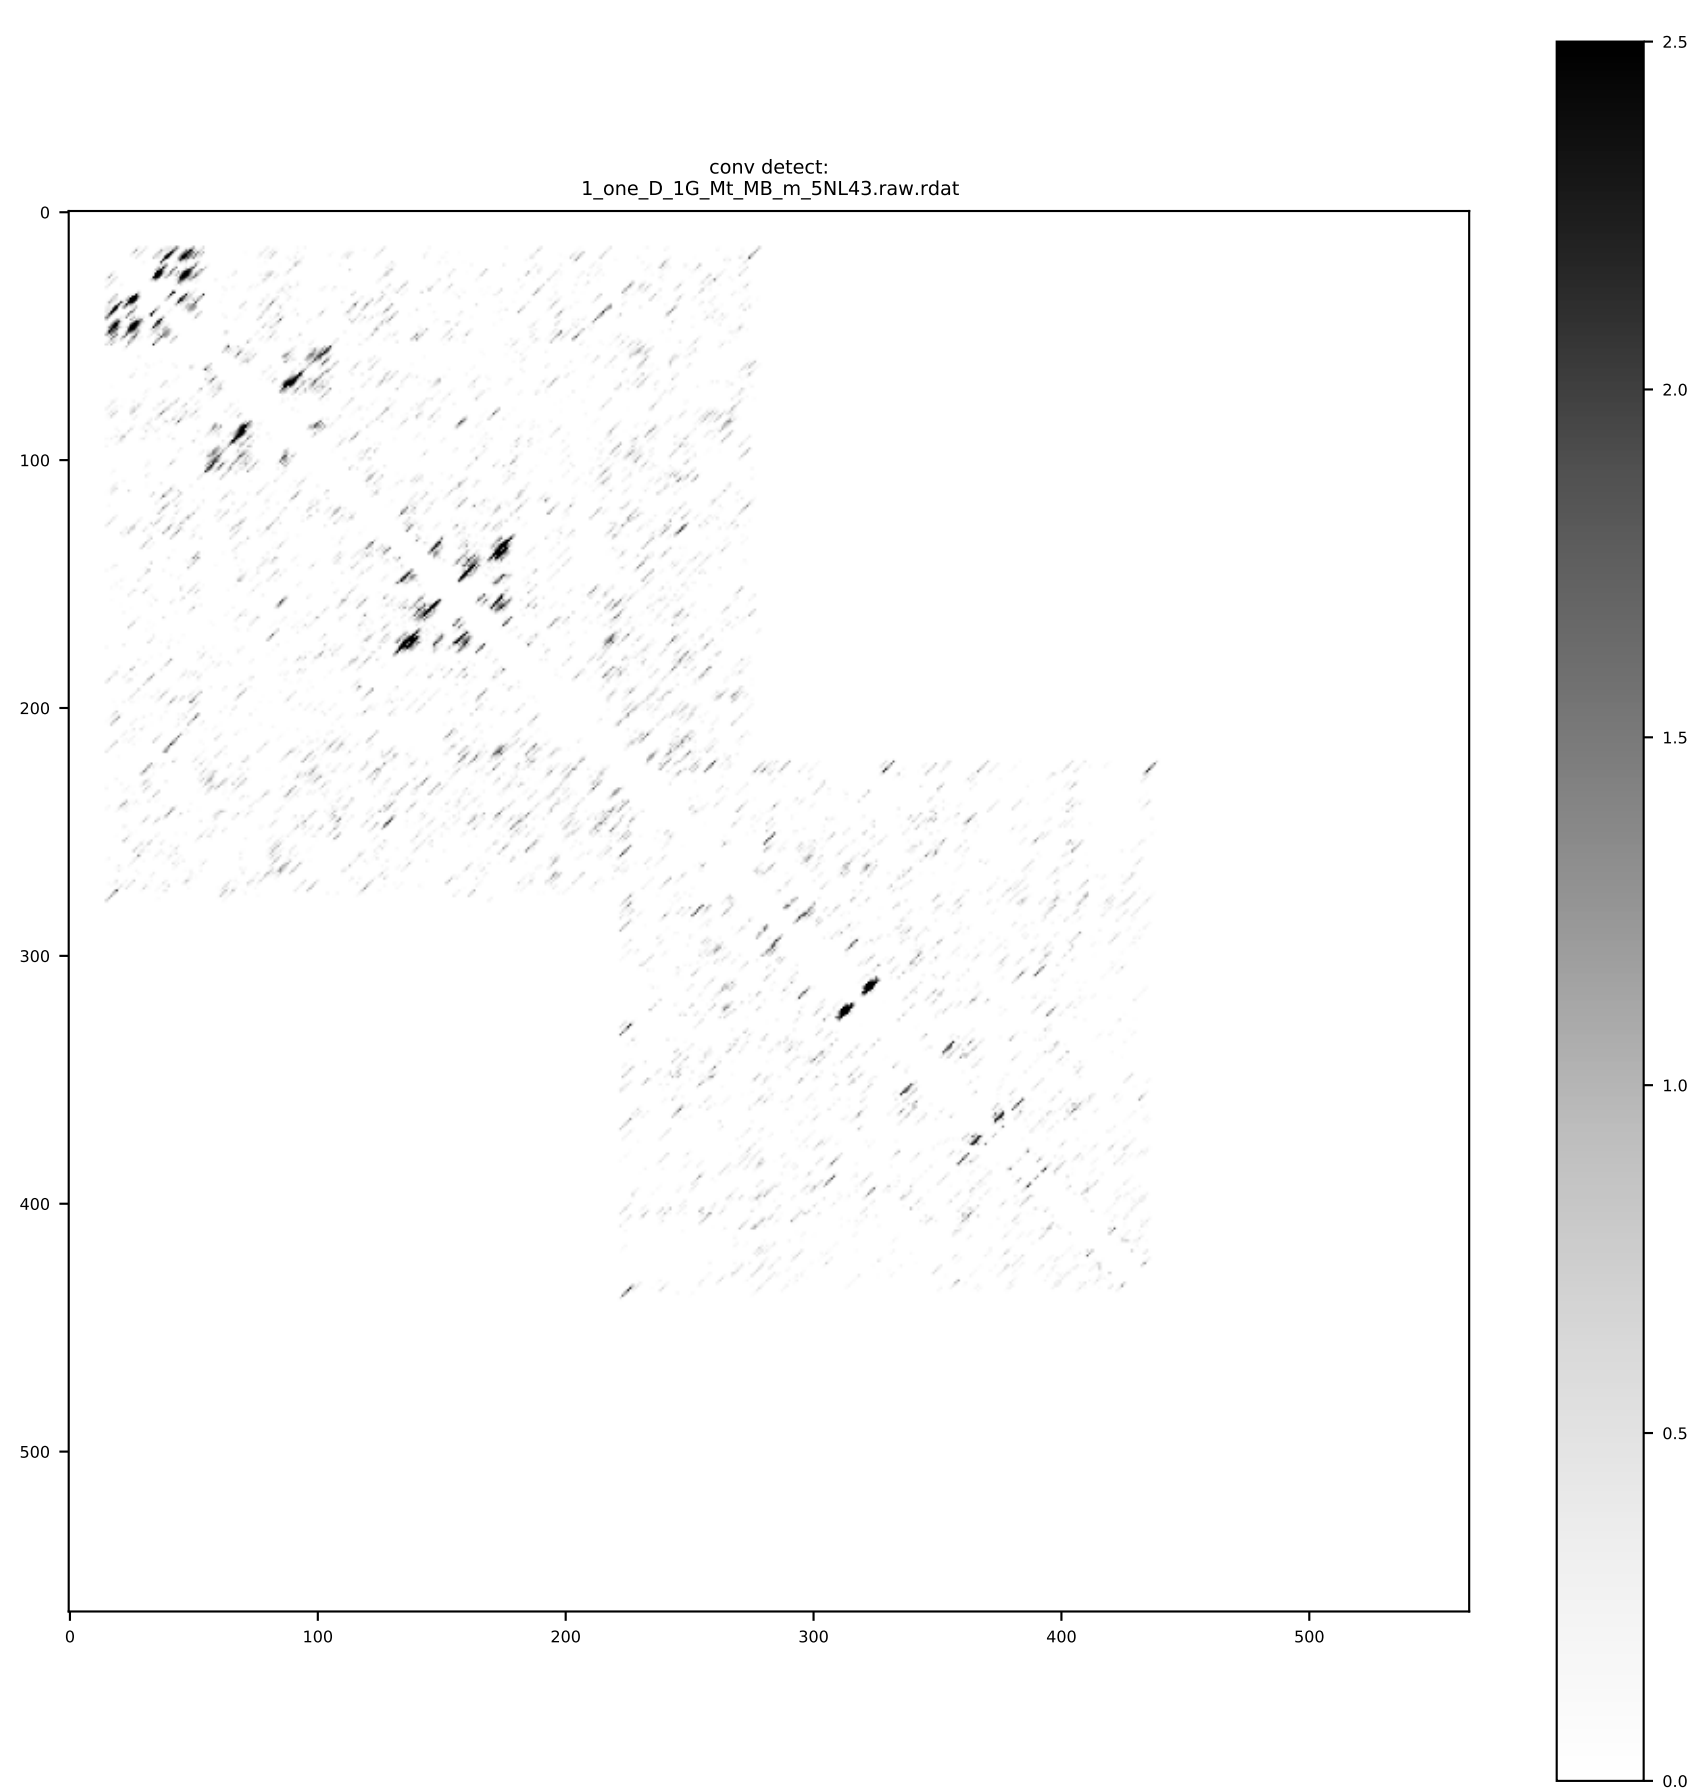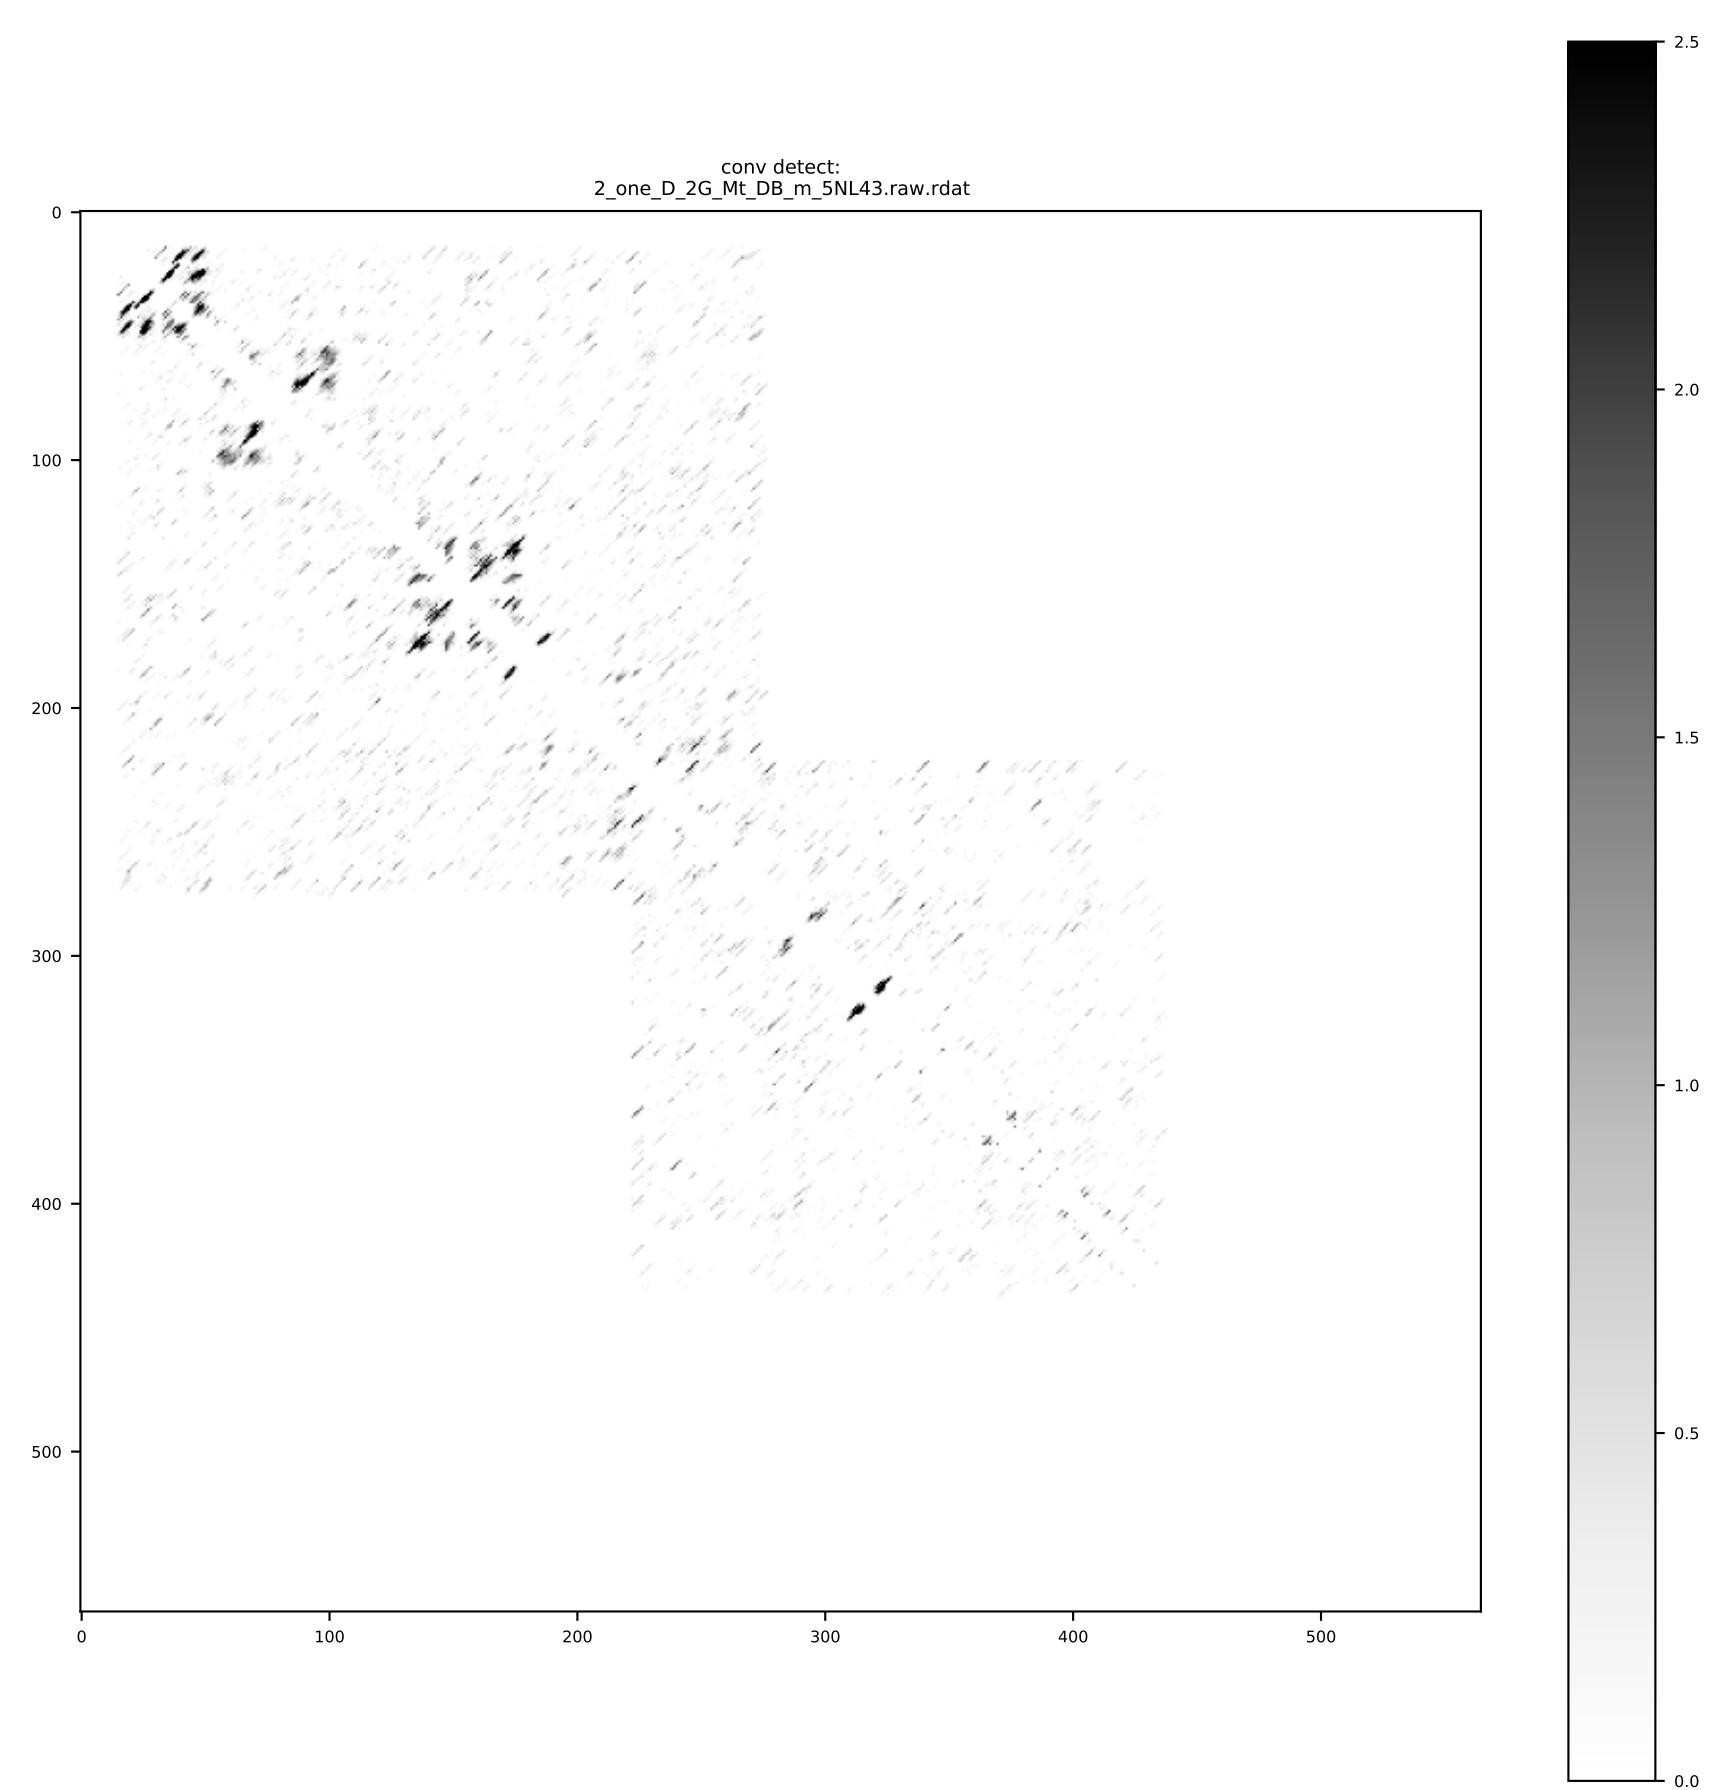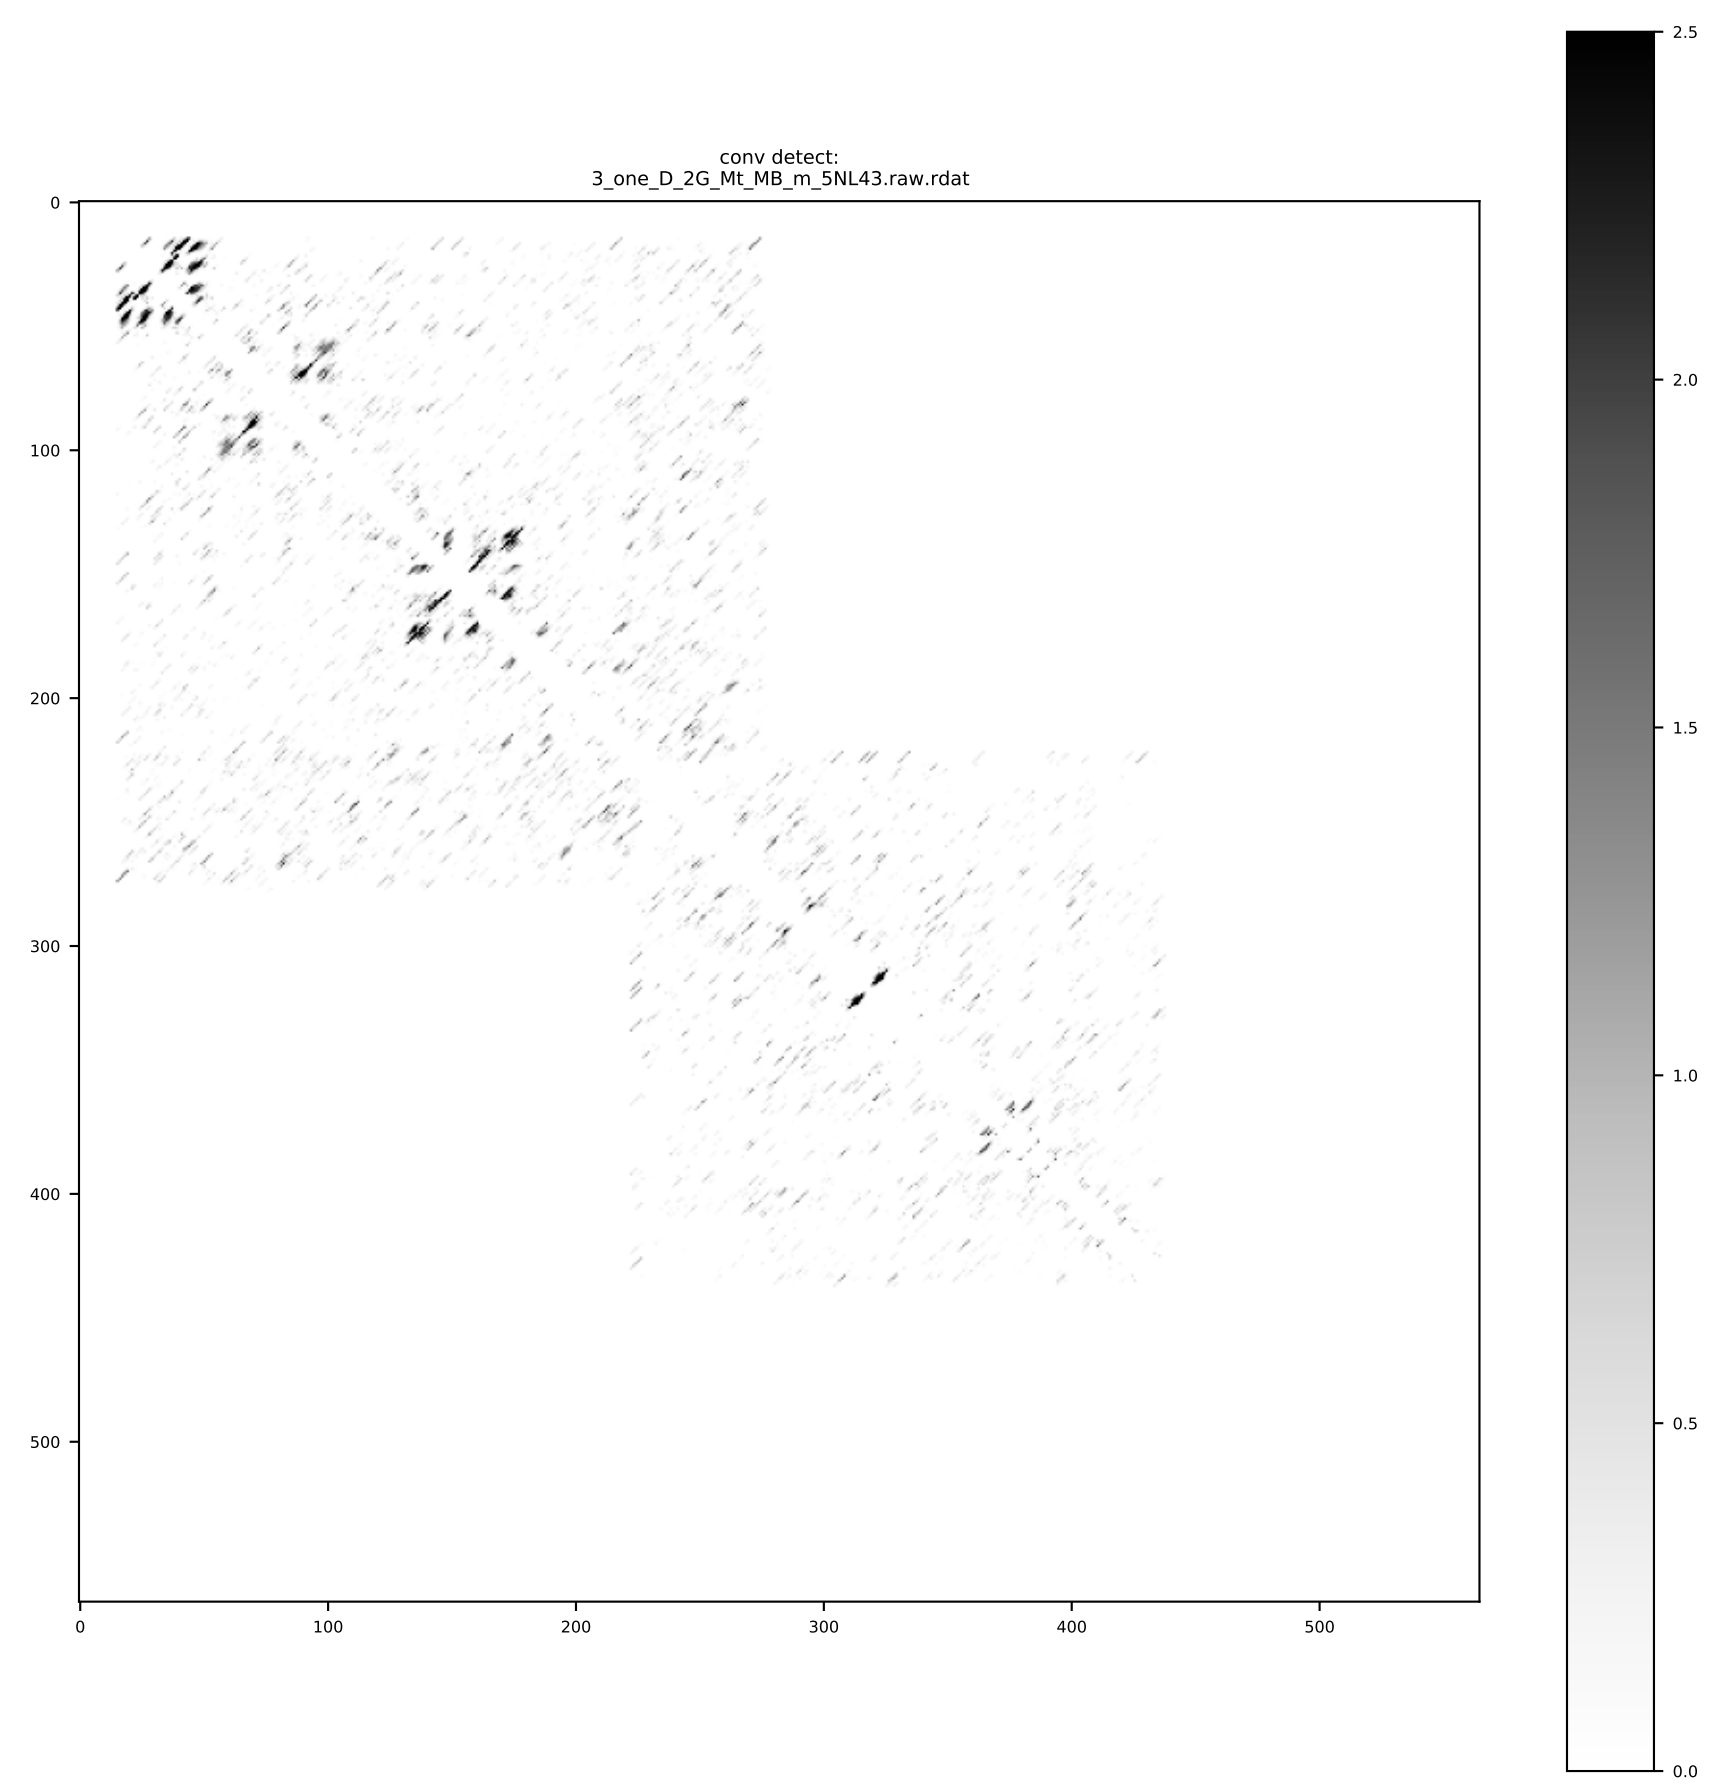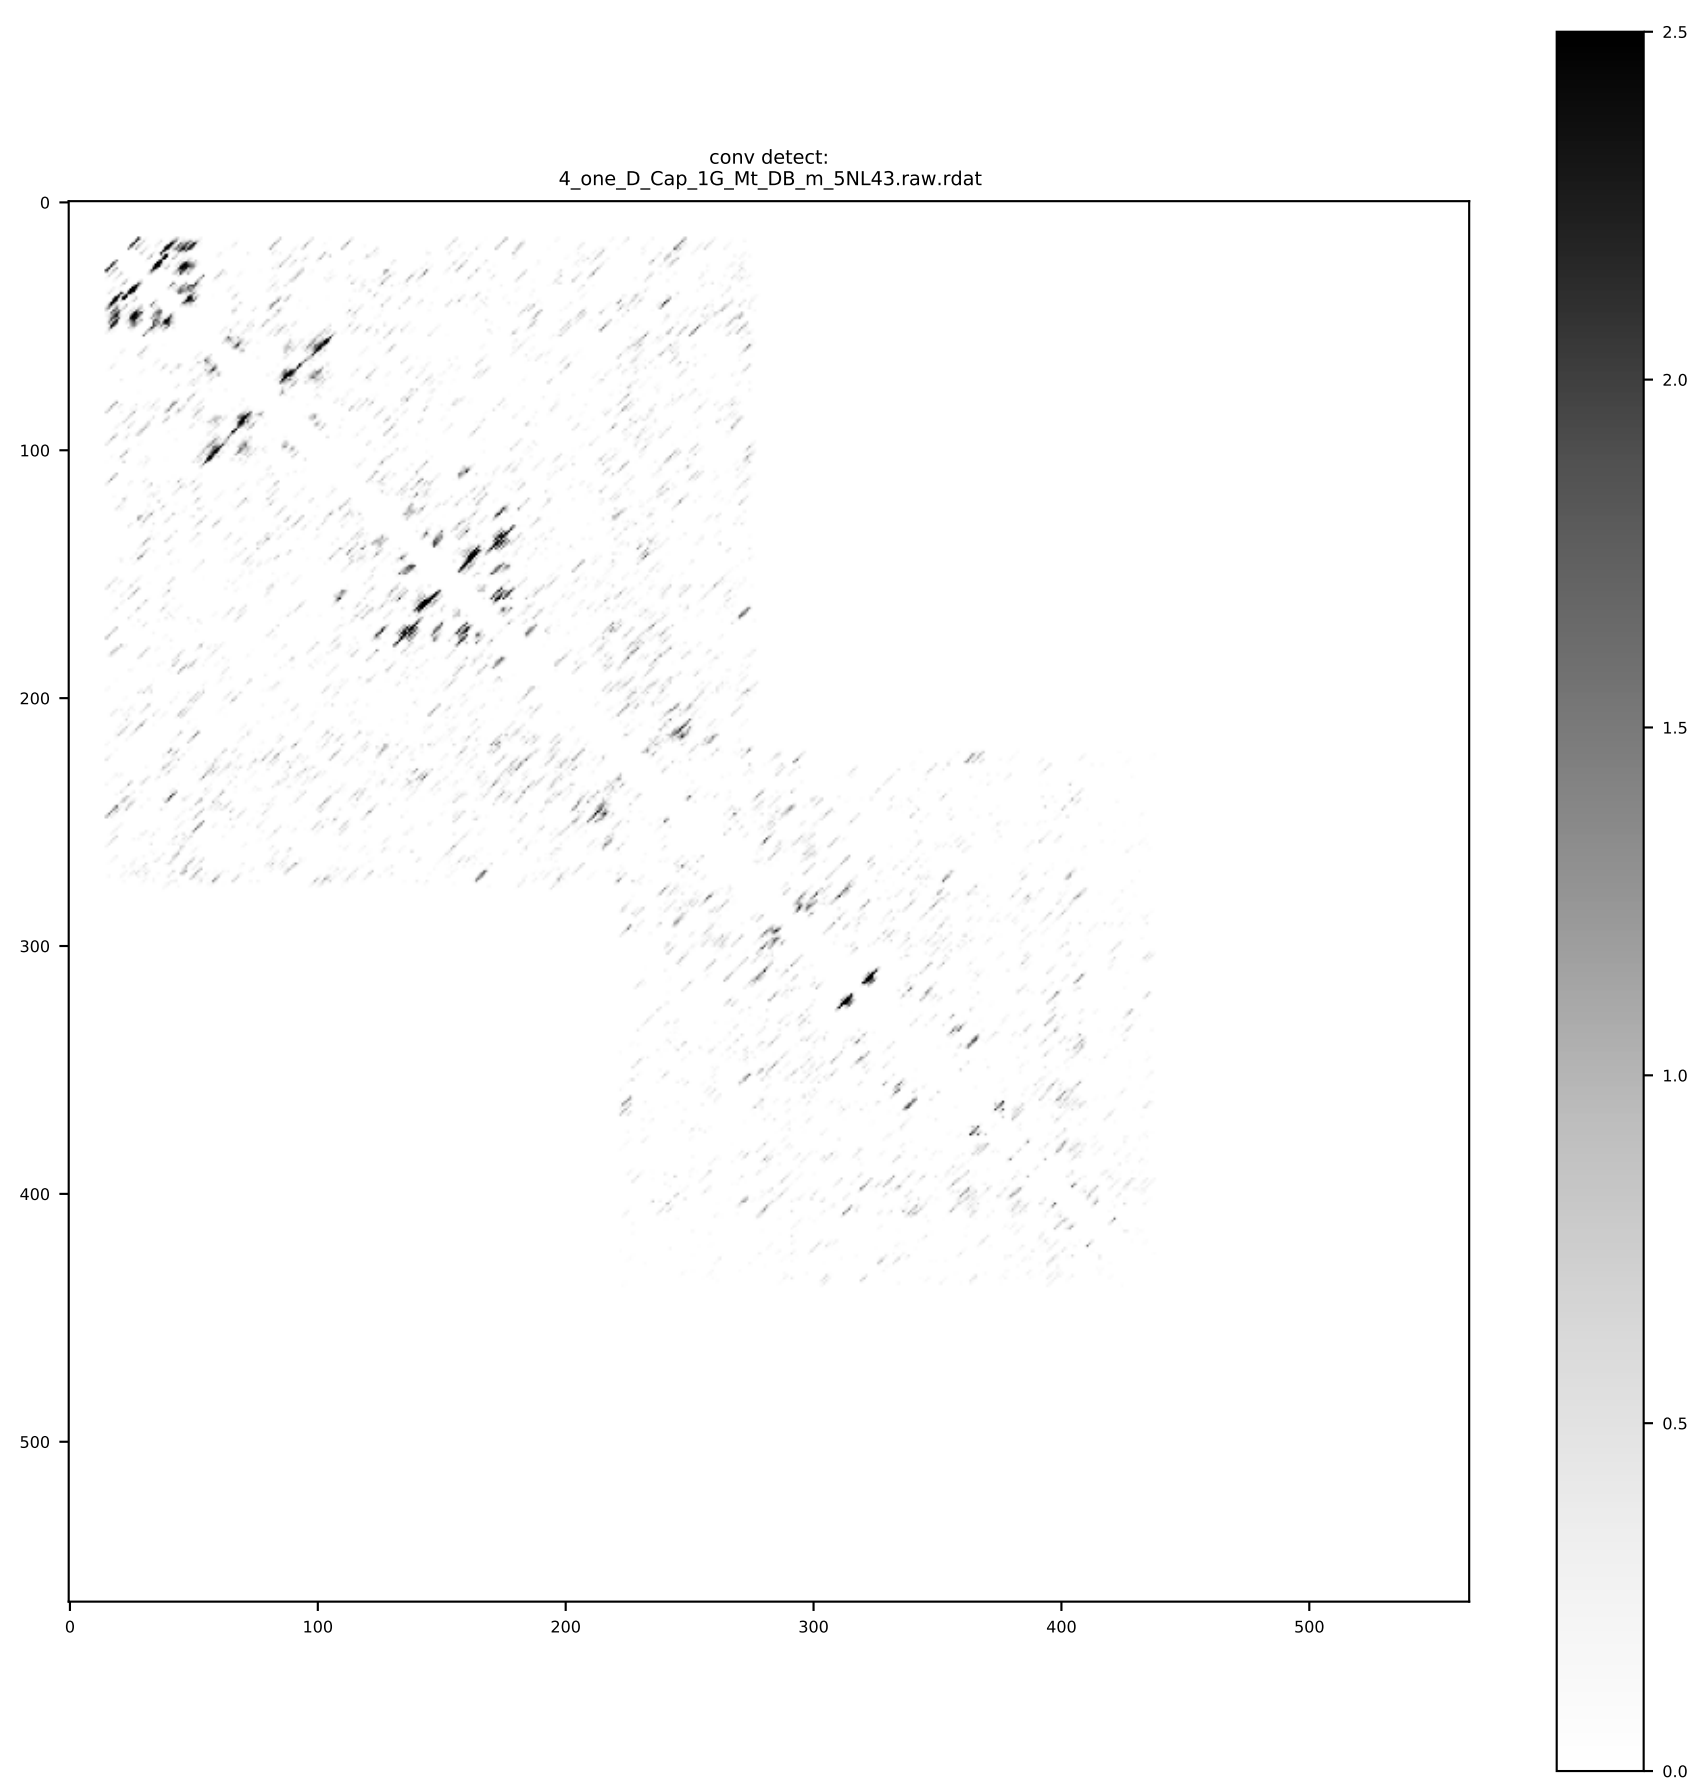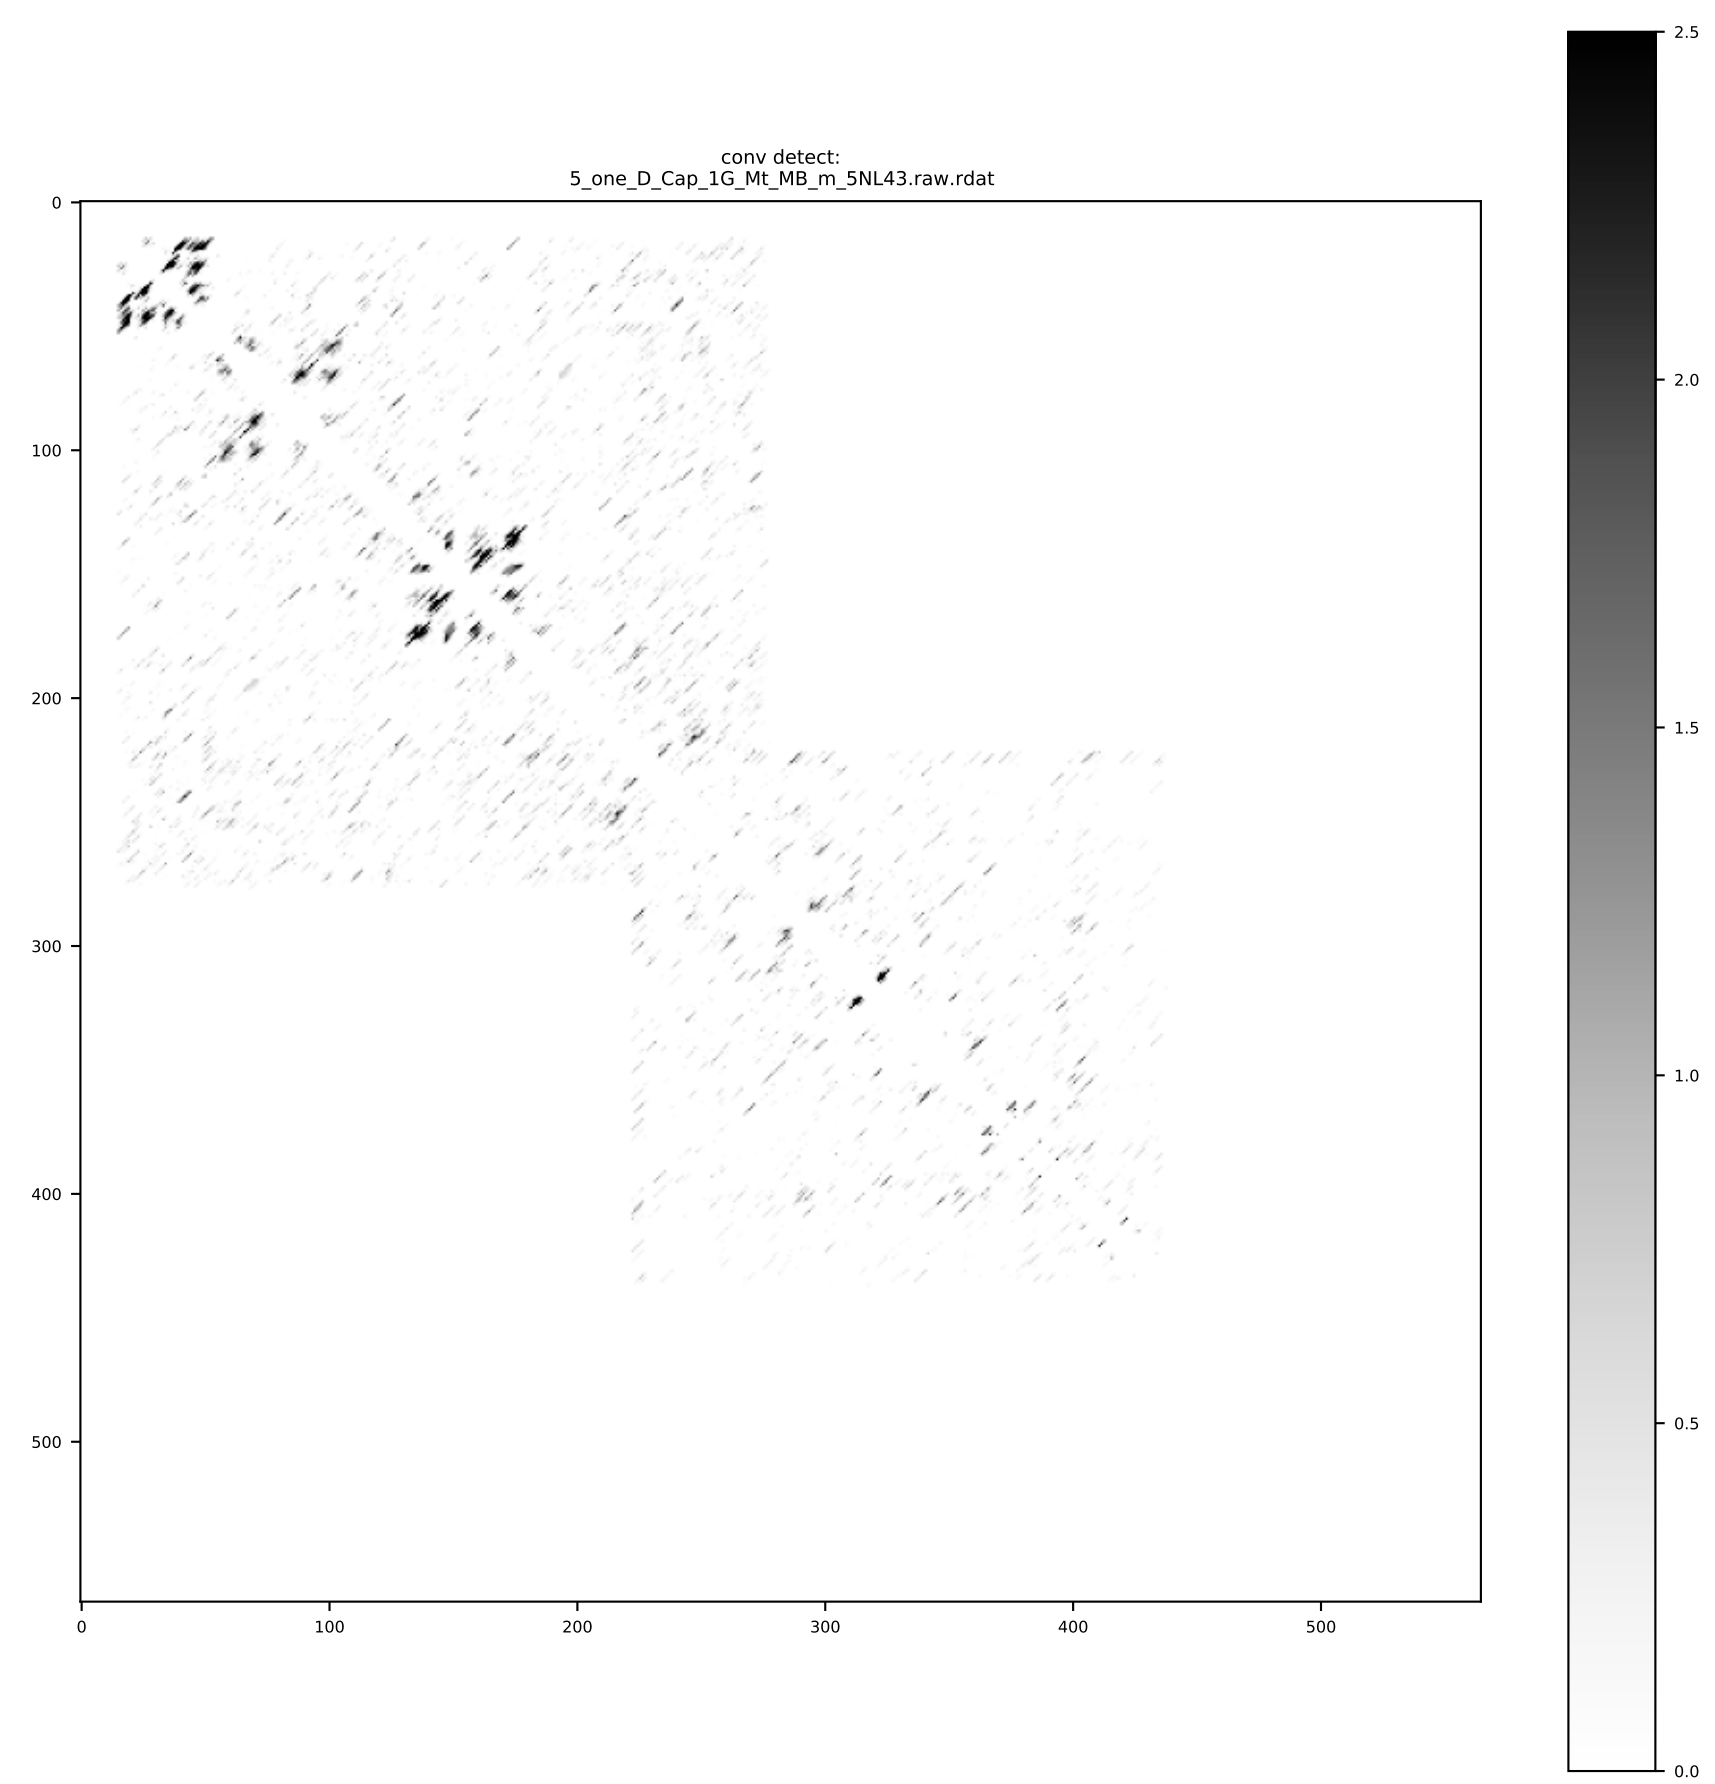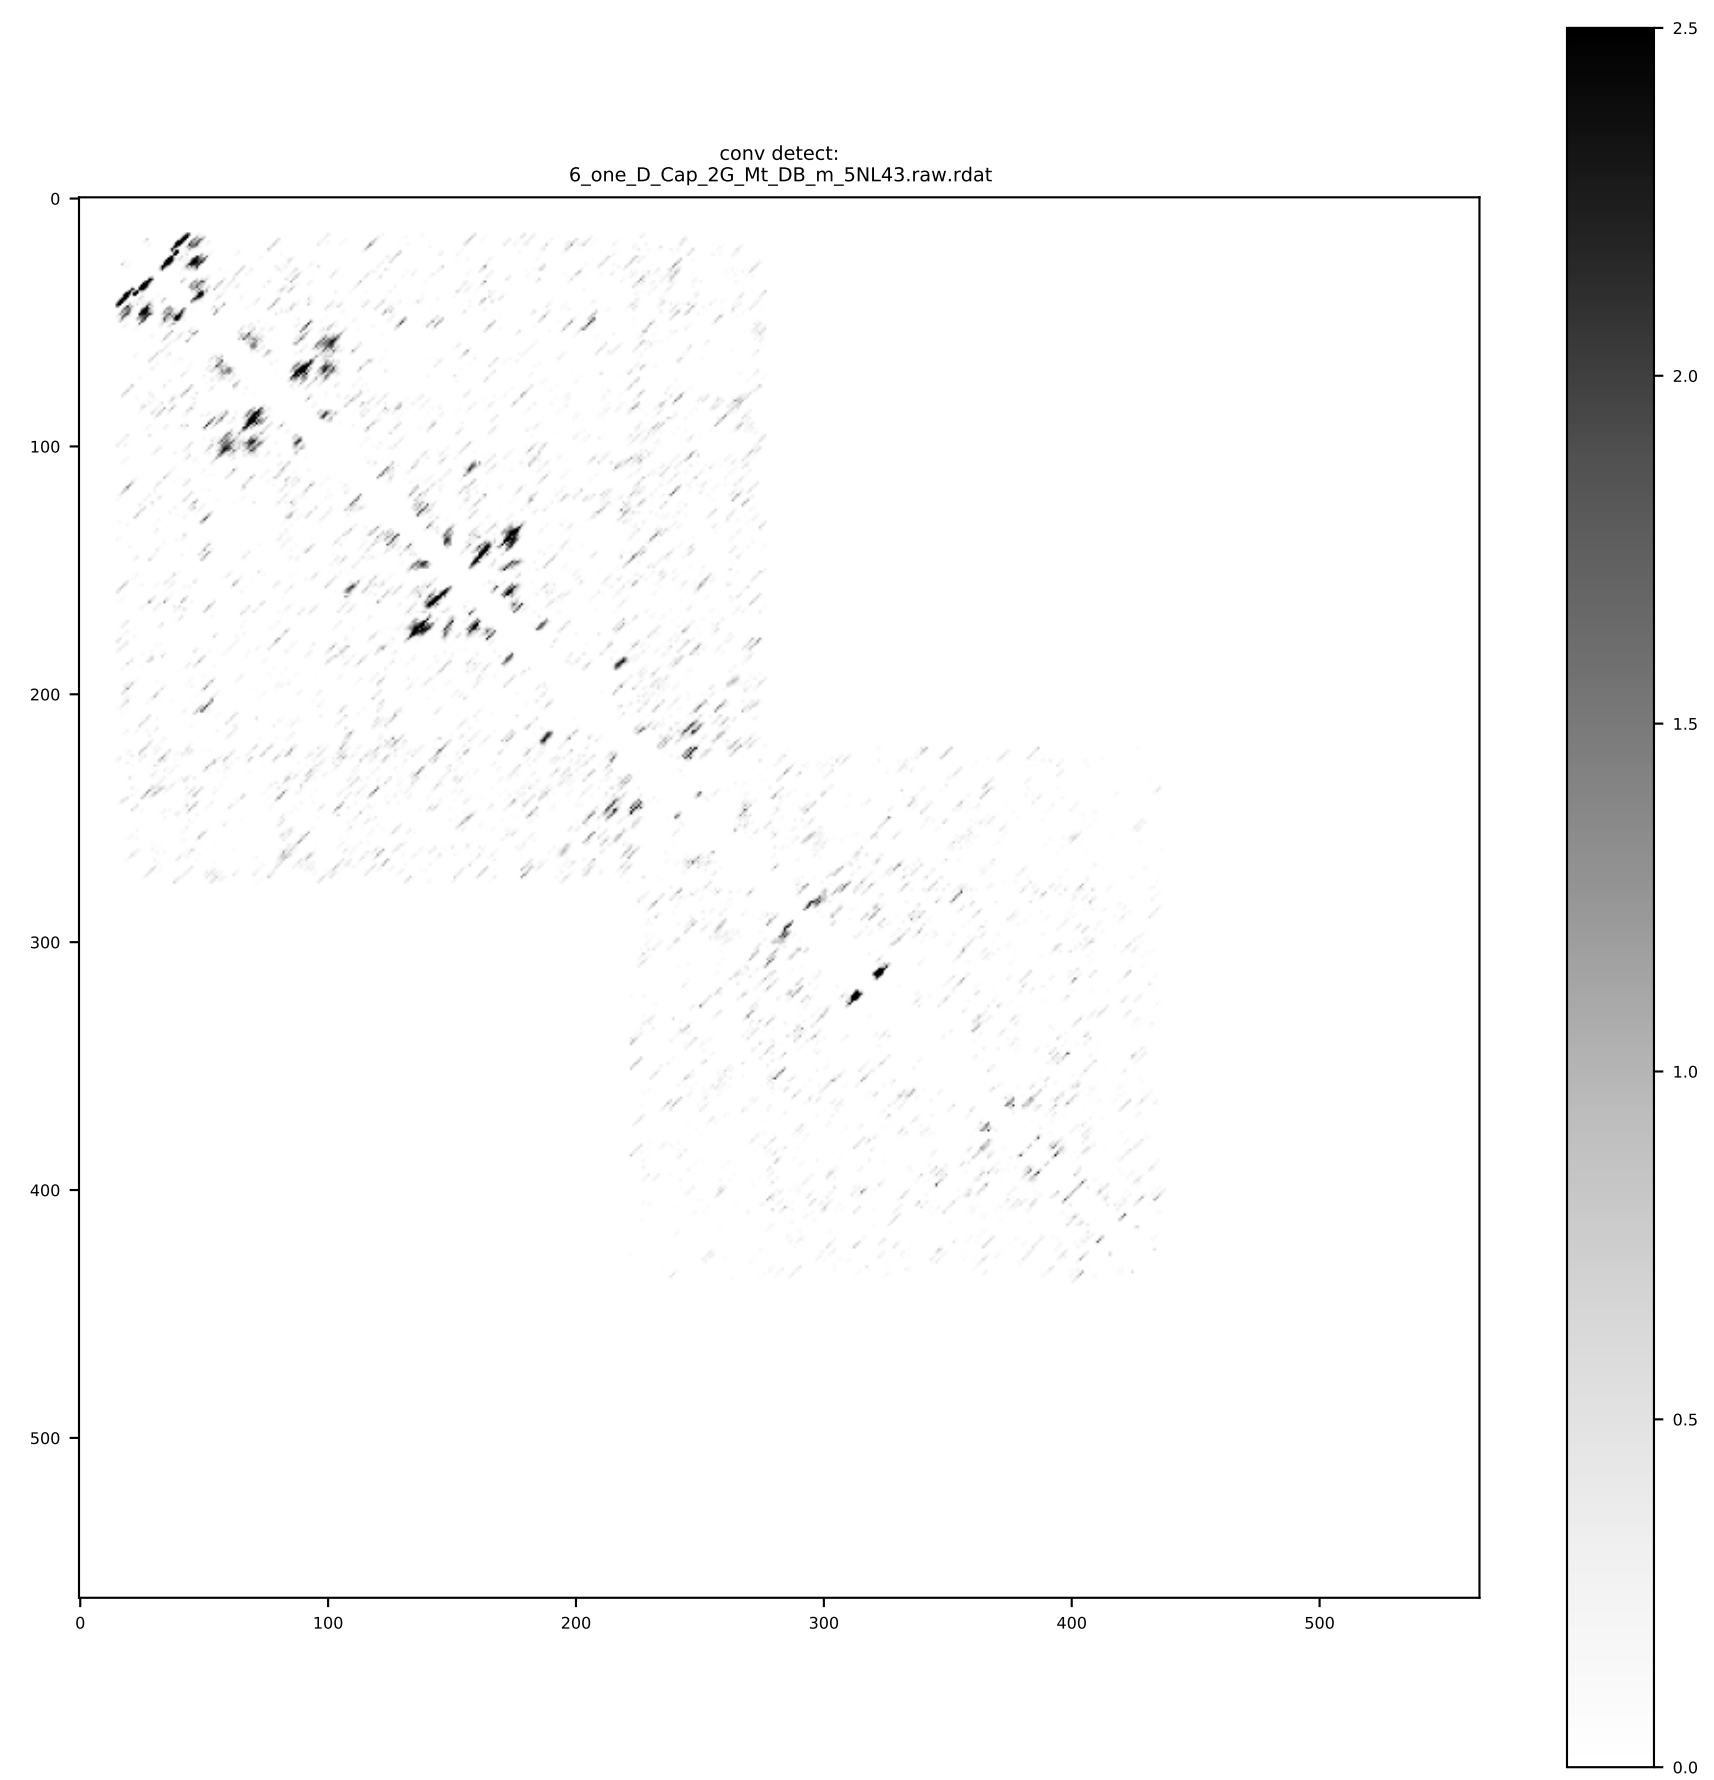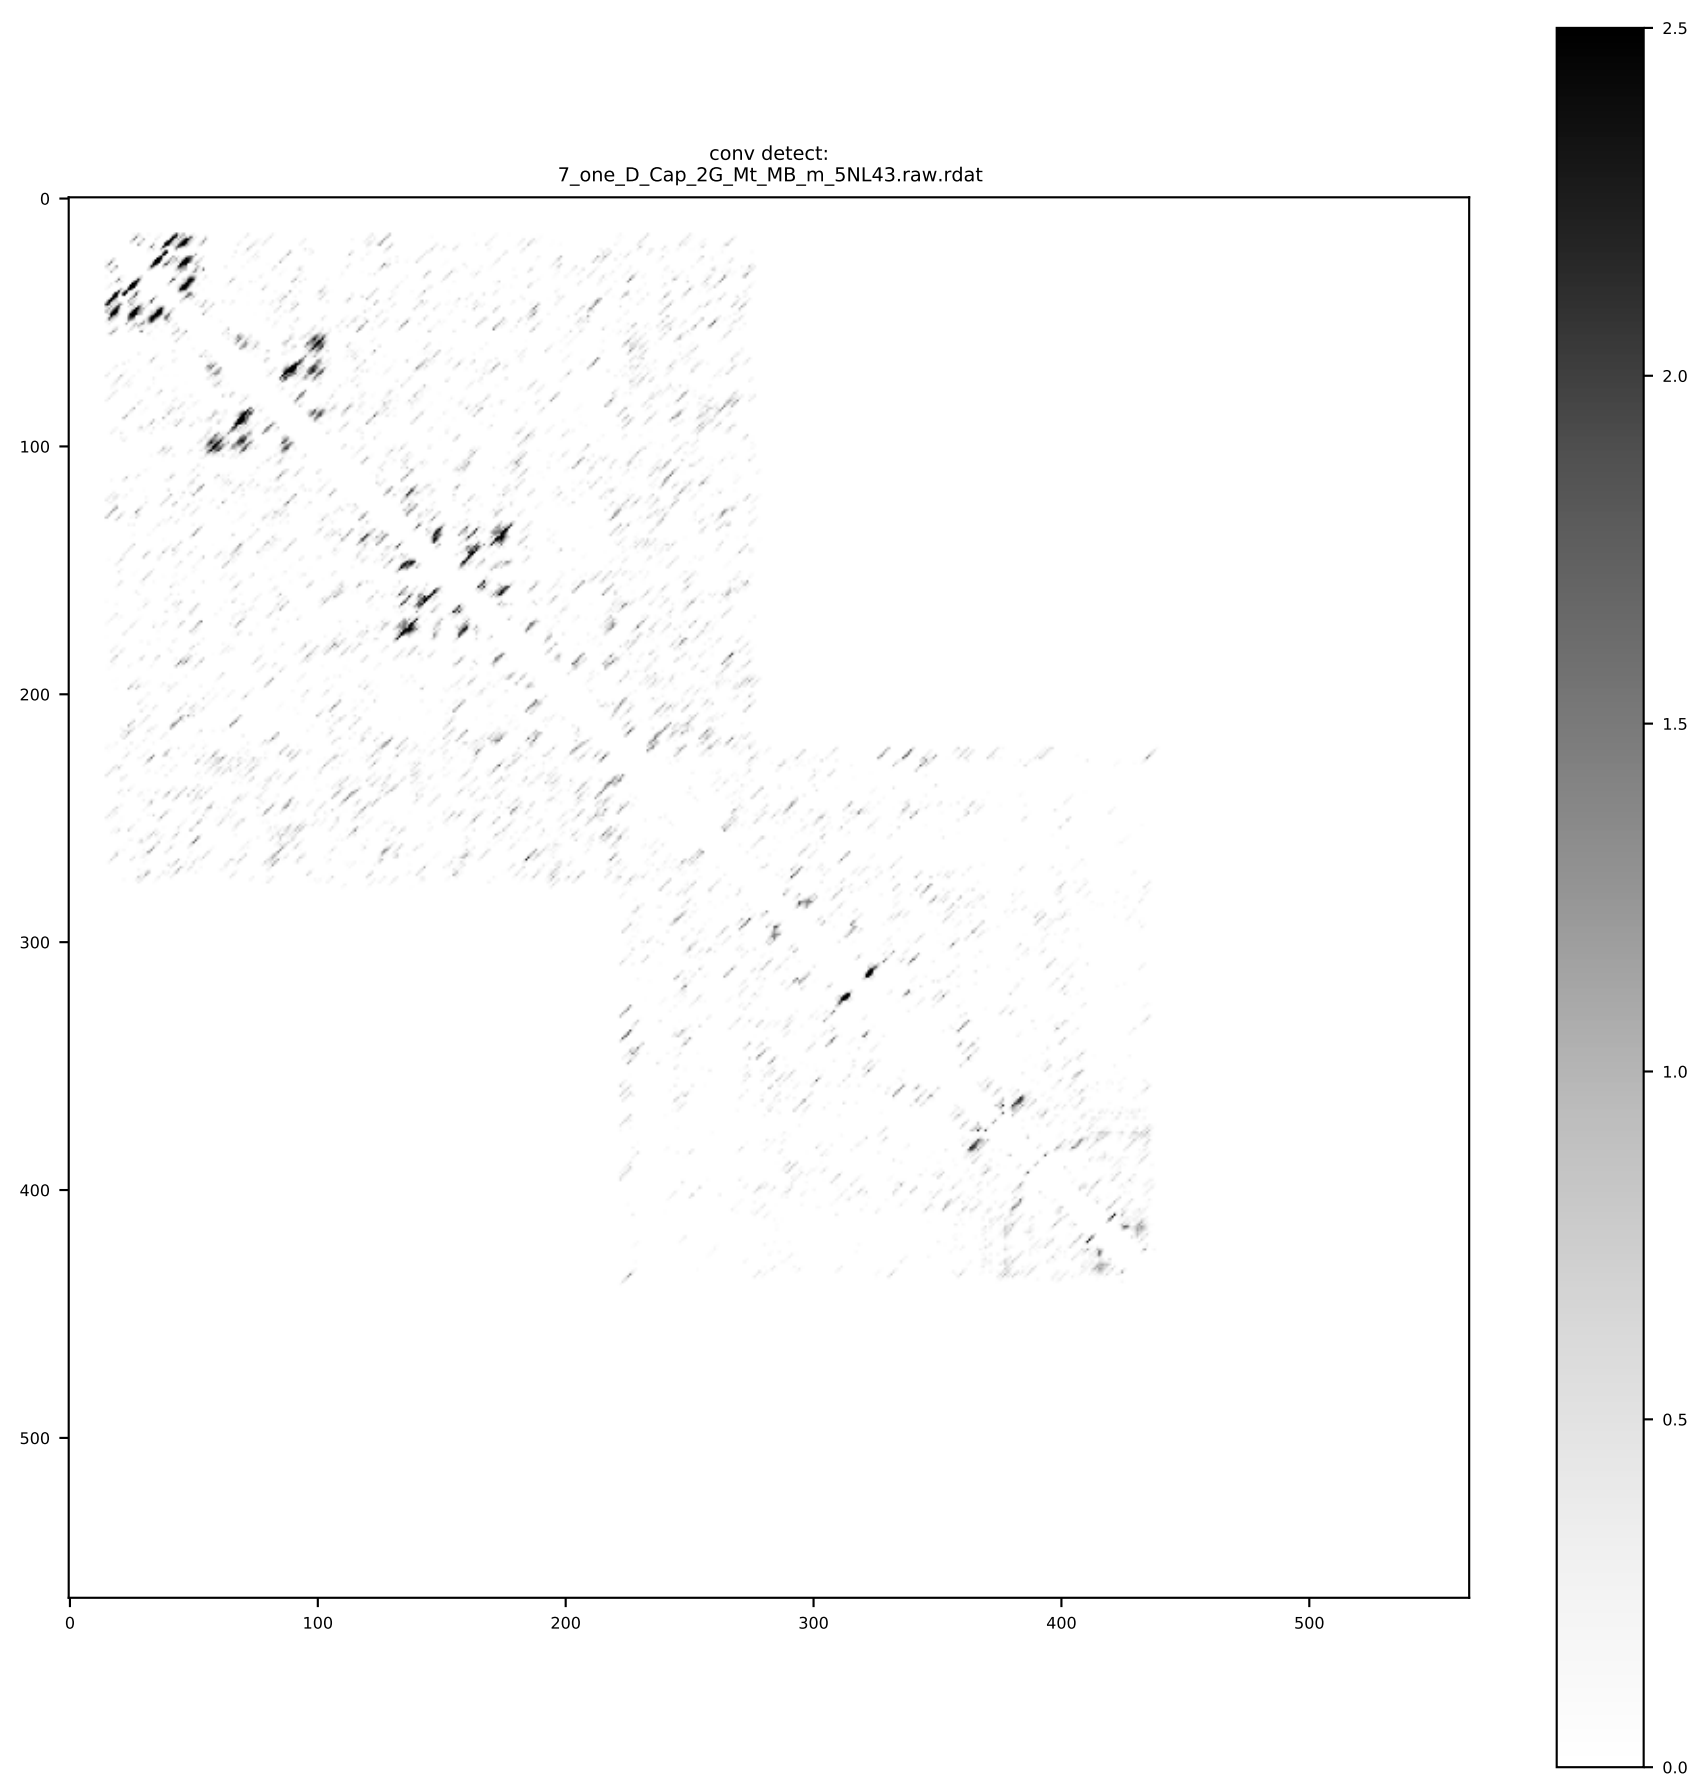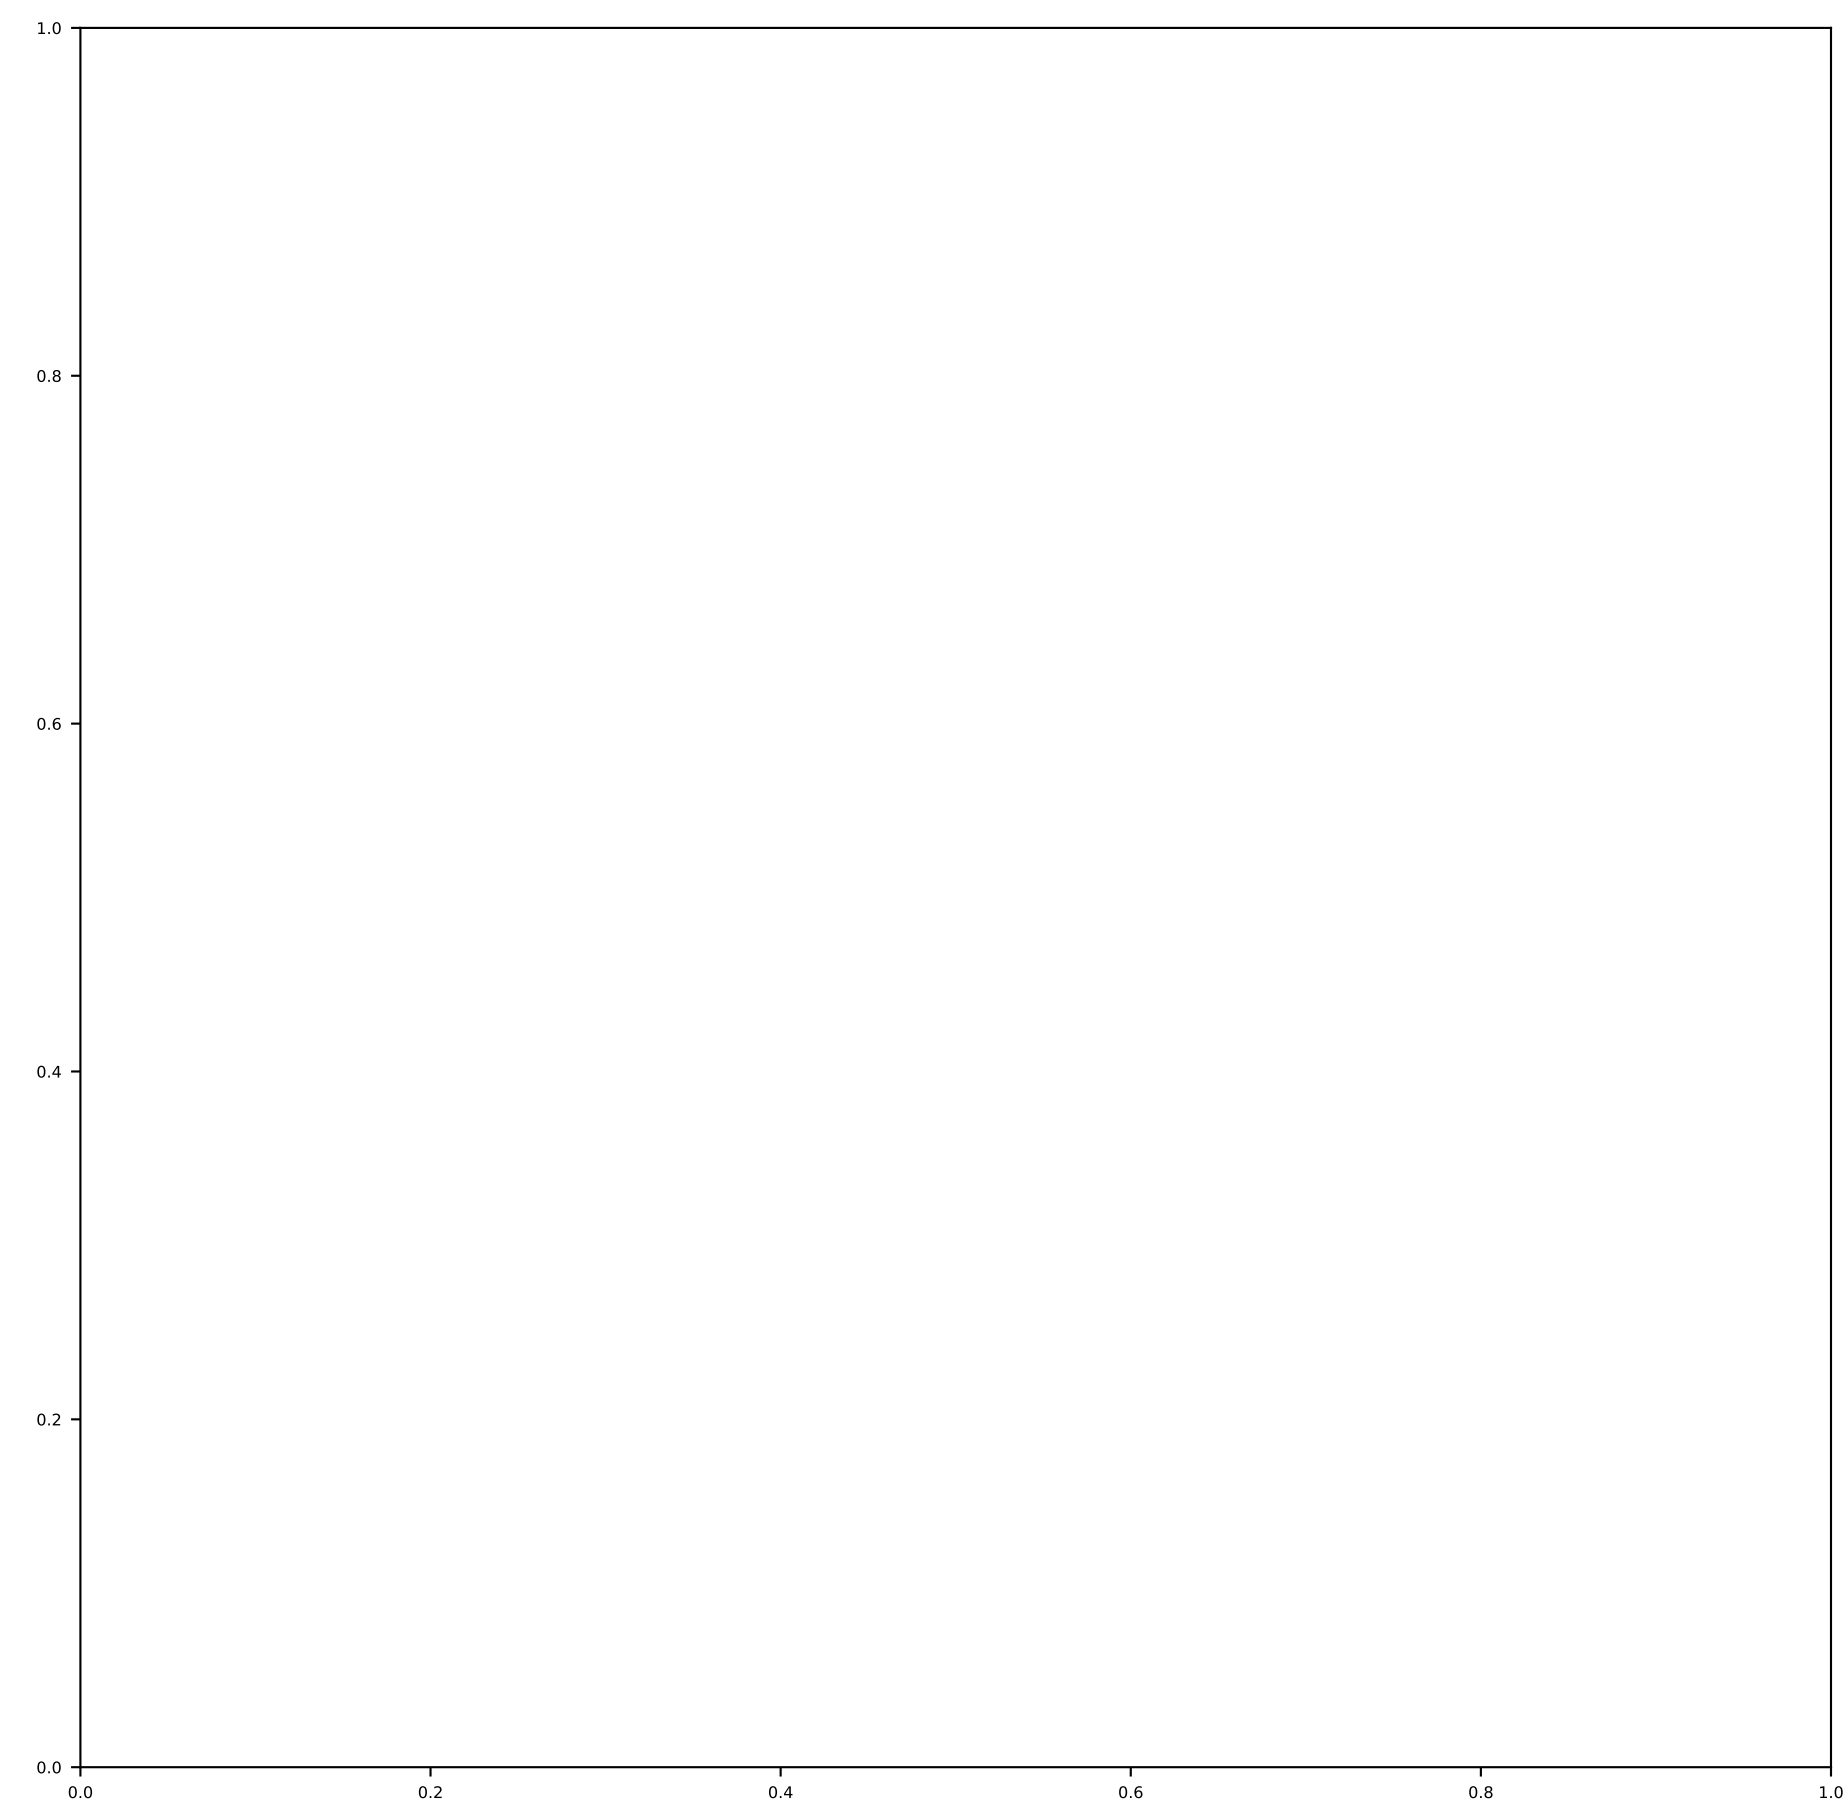

Supplement: Supplementary file 16 [file one_two_G_monomer_conv_filter.pdf › 2d-structure-inference/convolution_filtered/one_two_G_monomer_conv_filter.pdf]

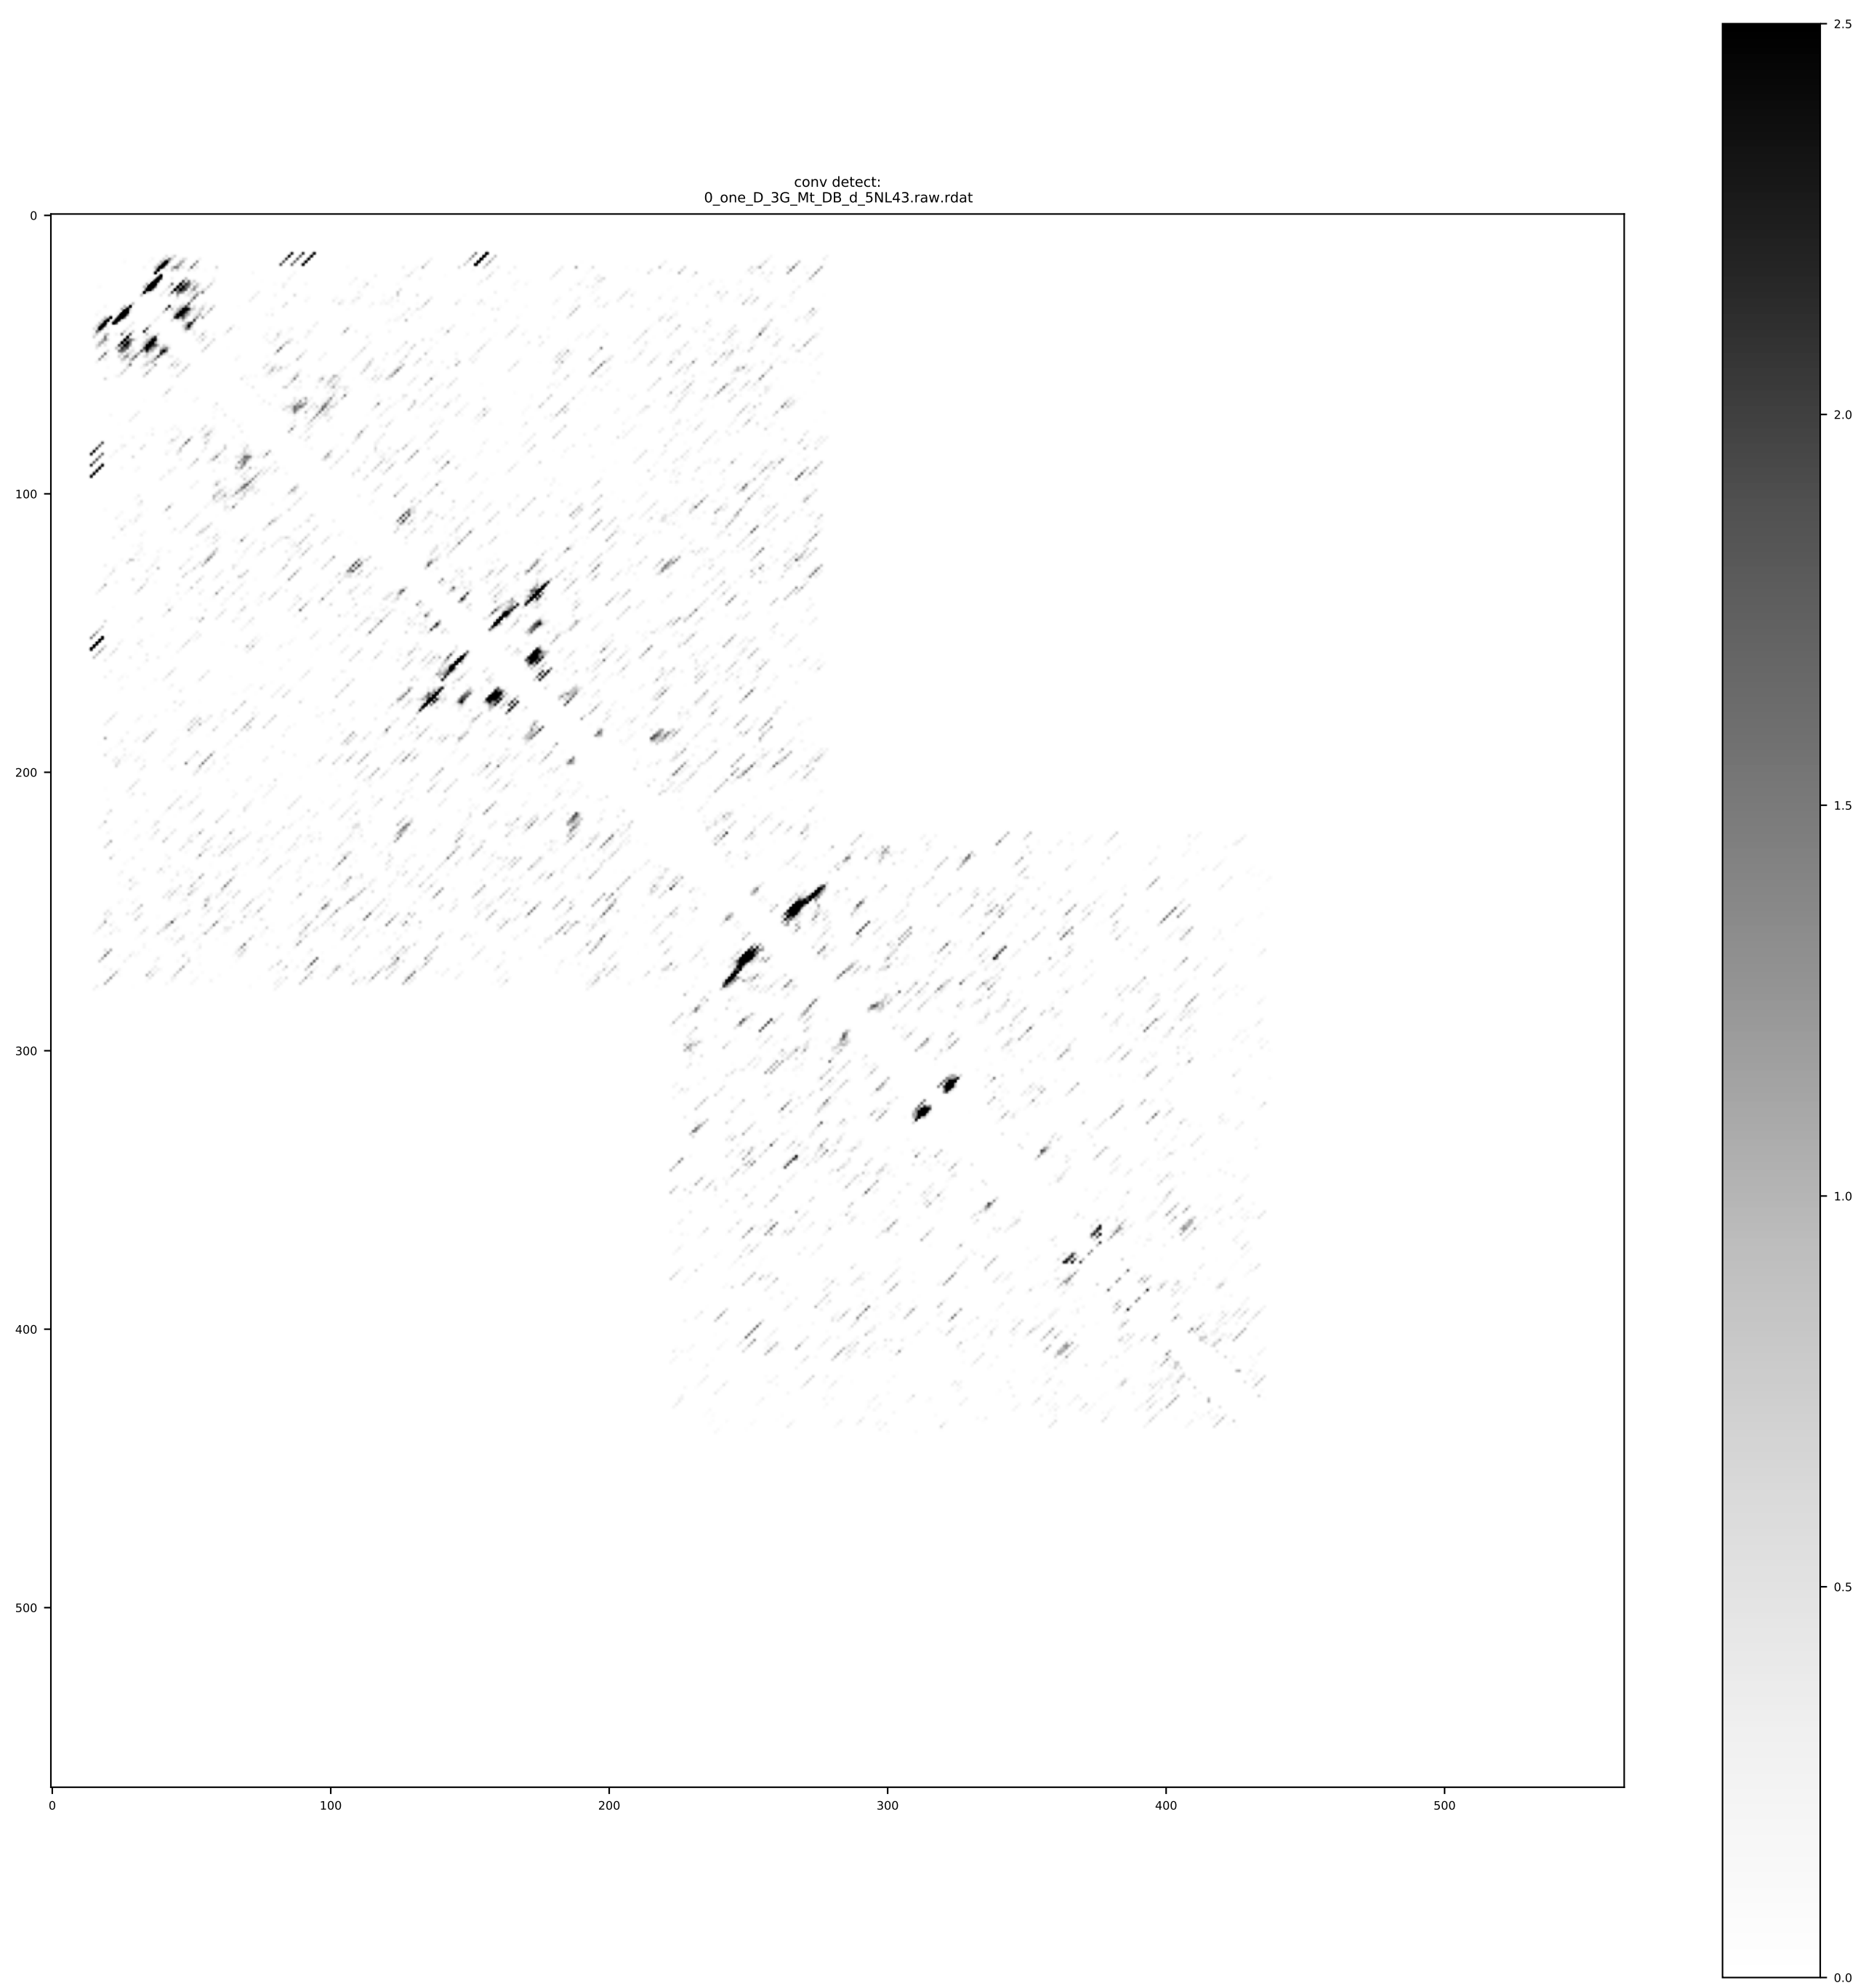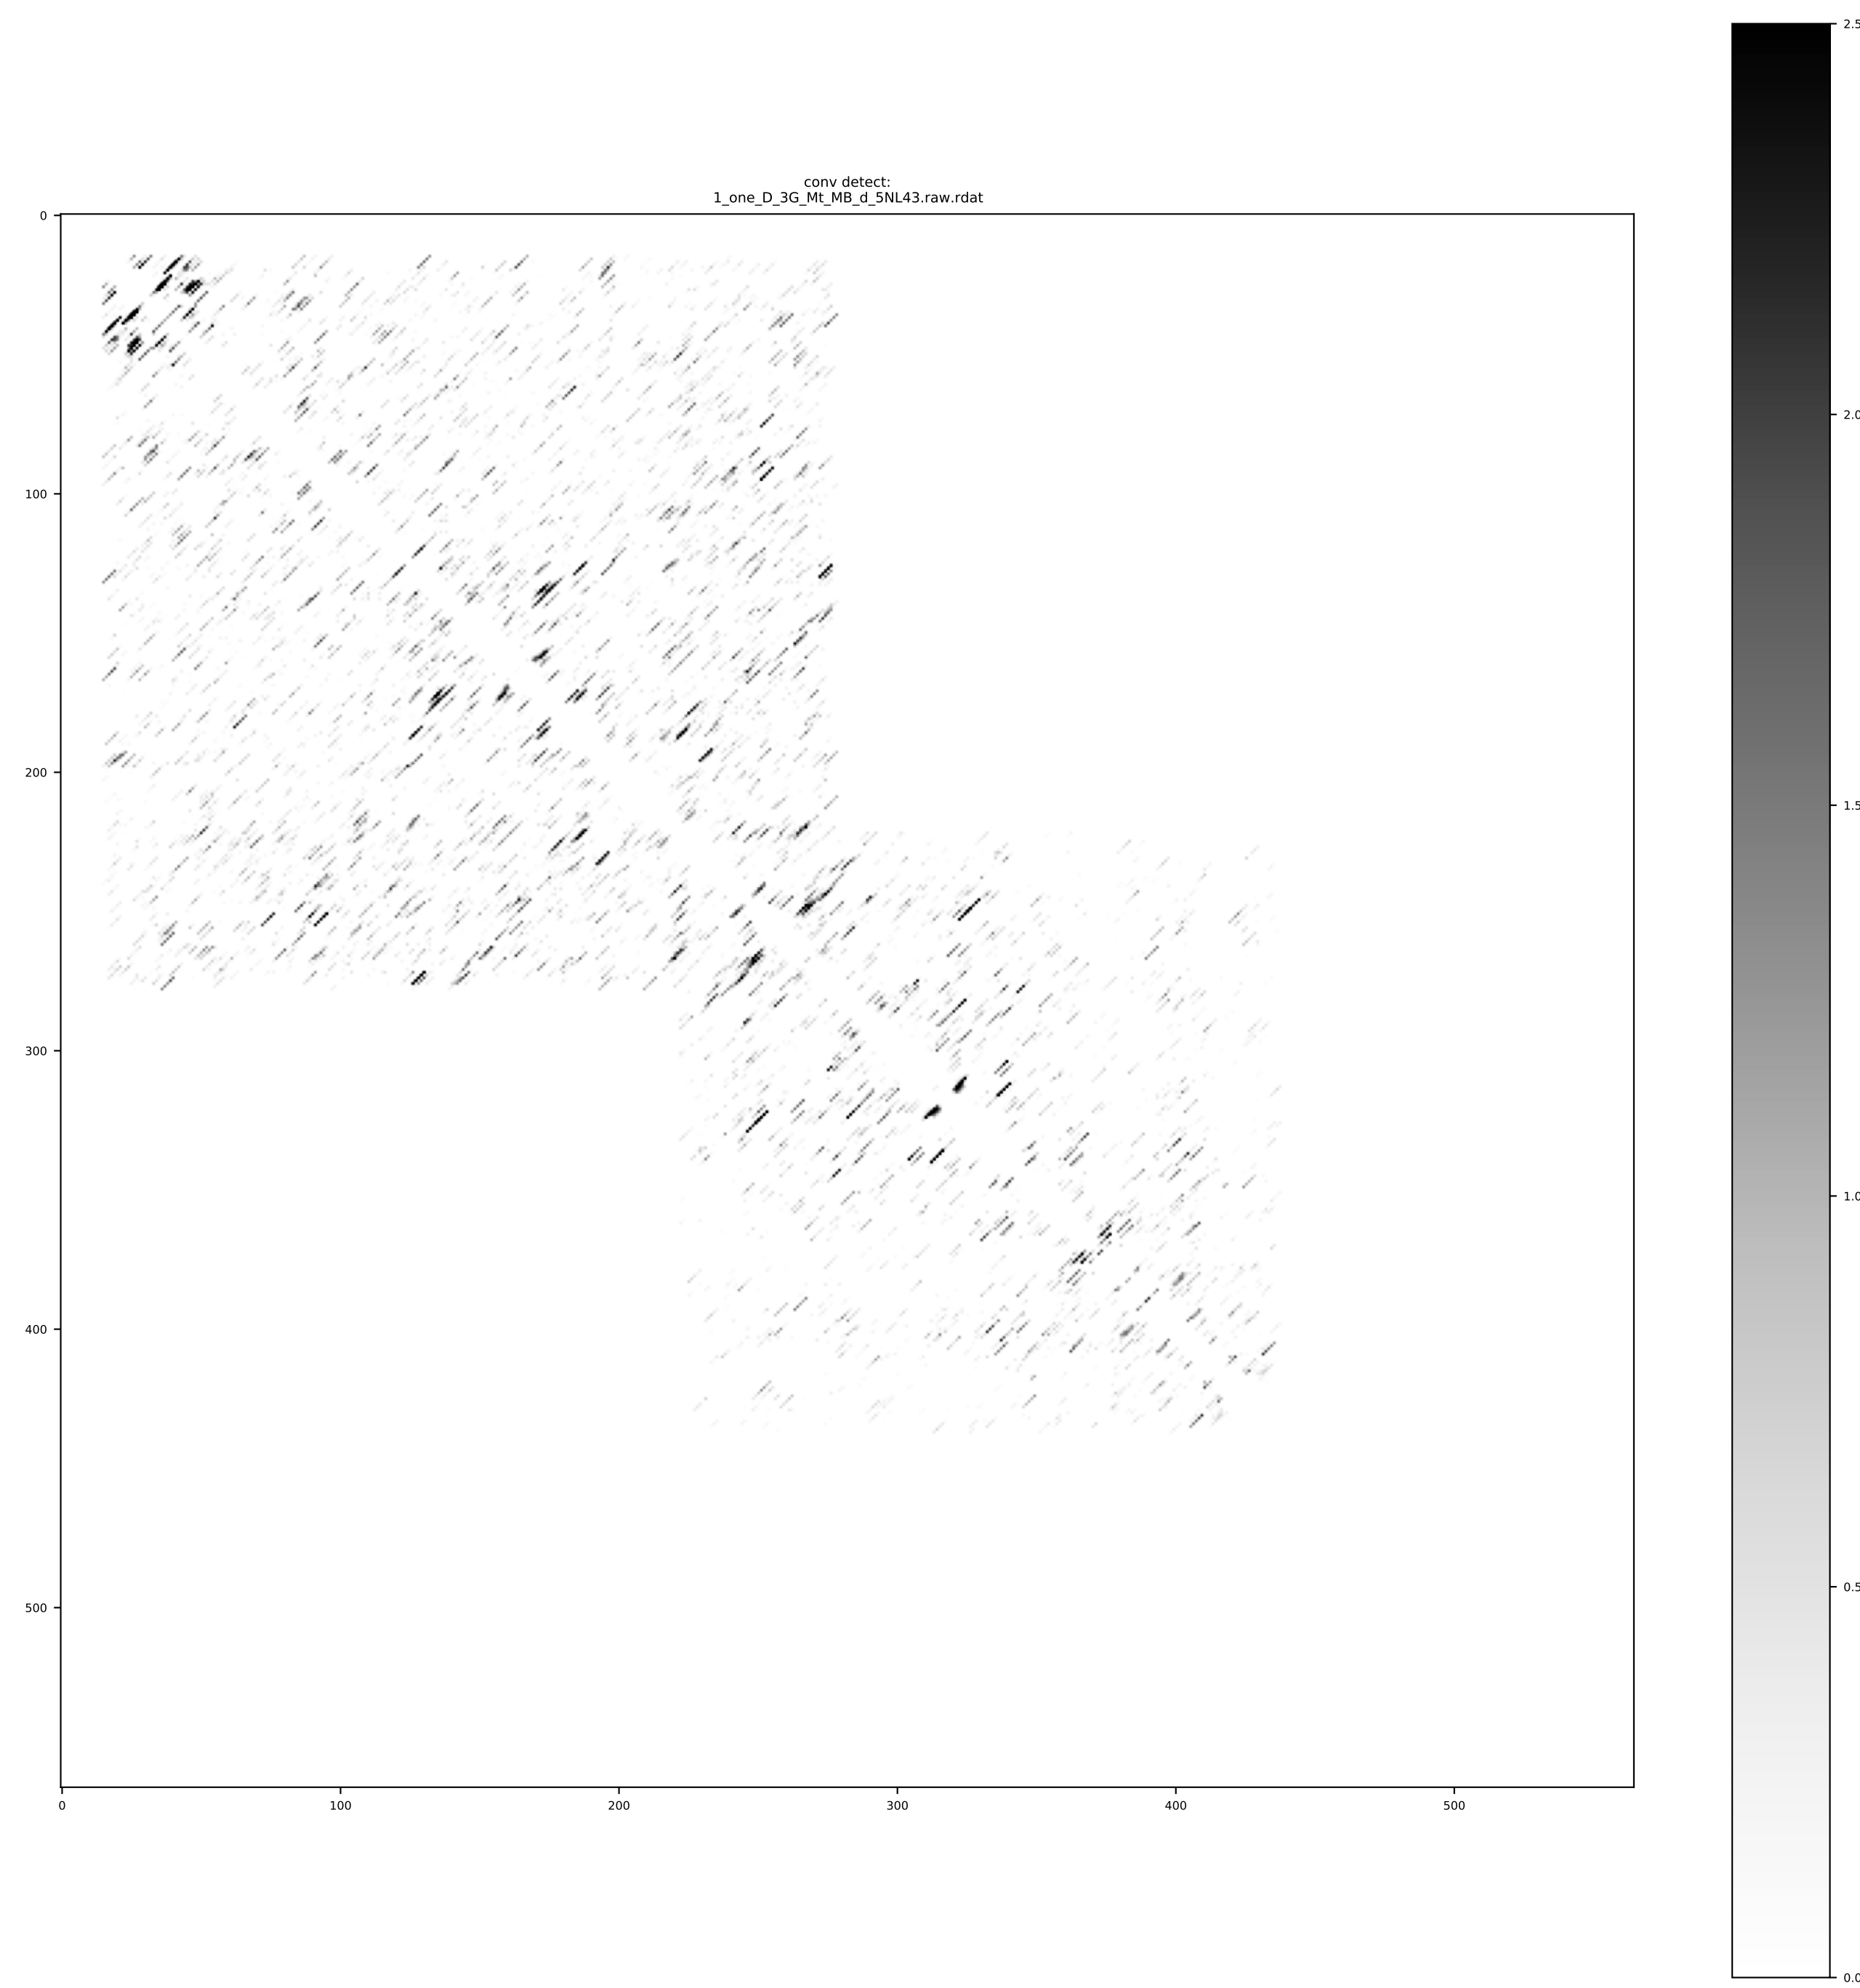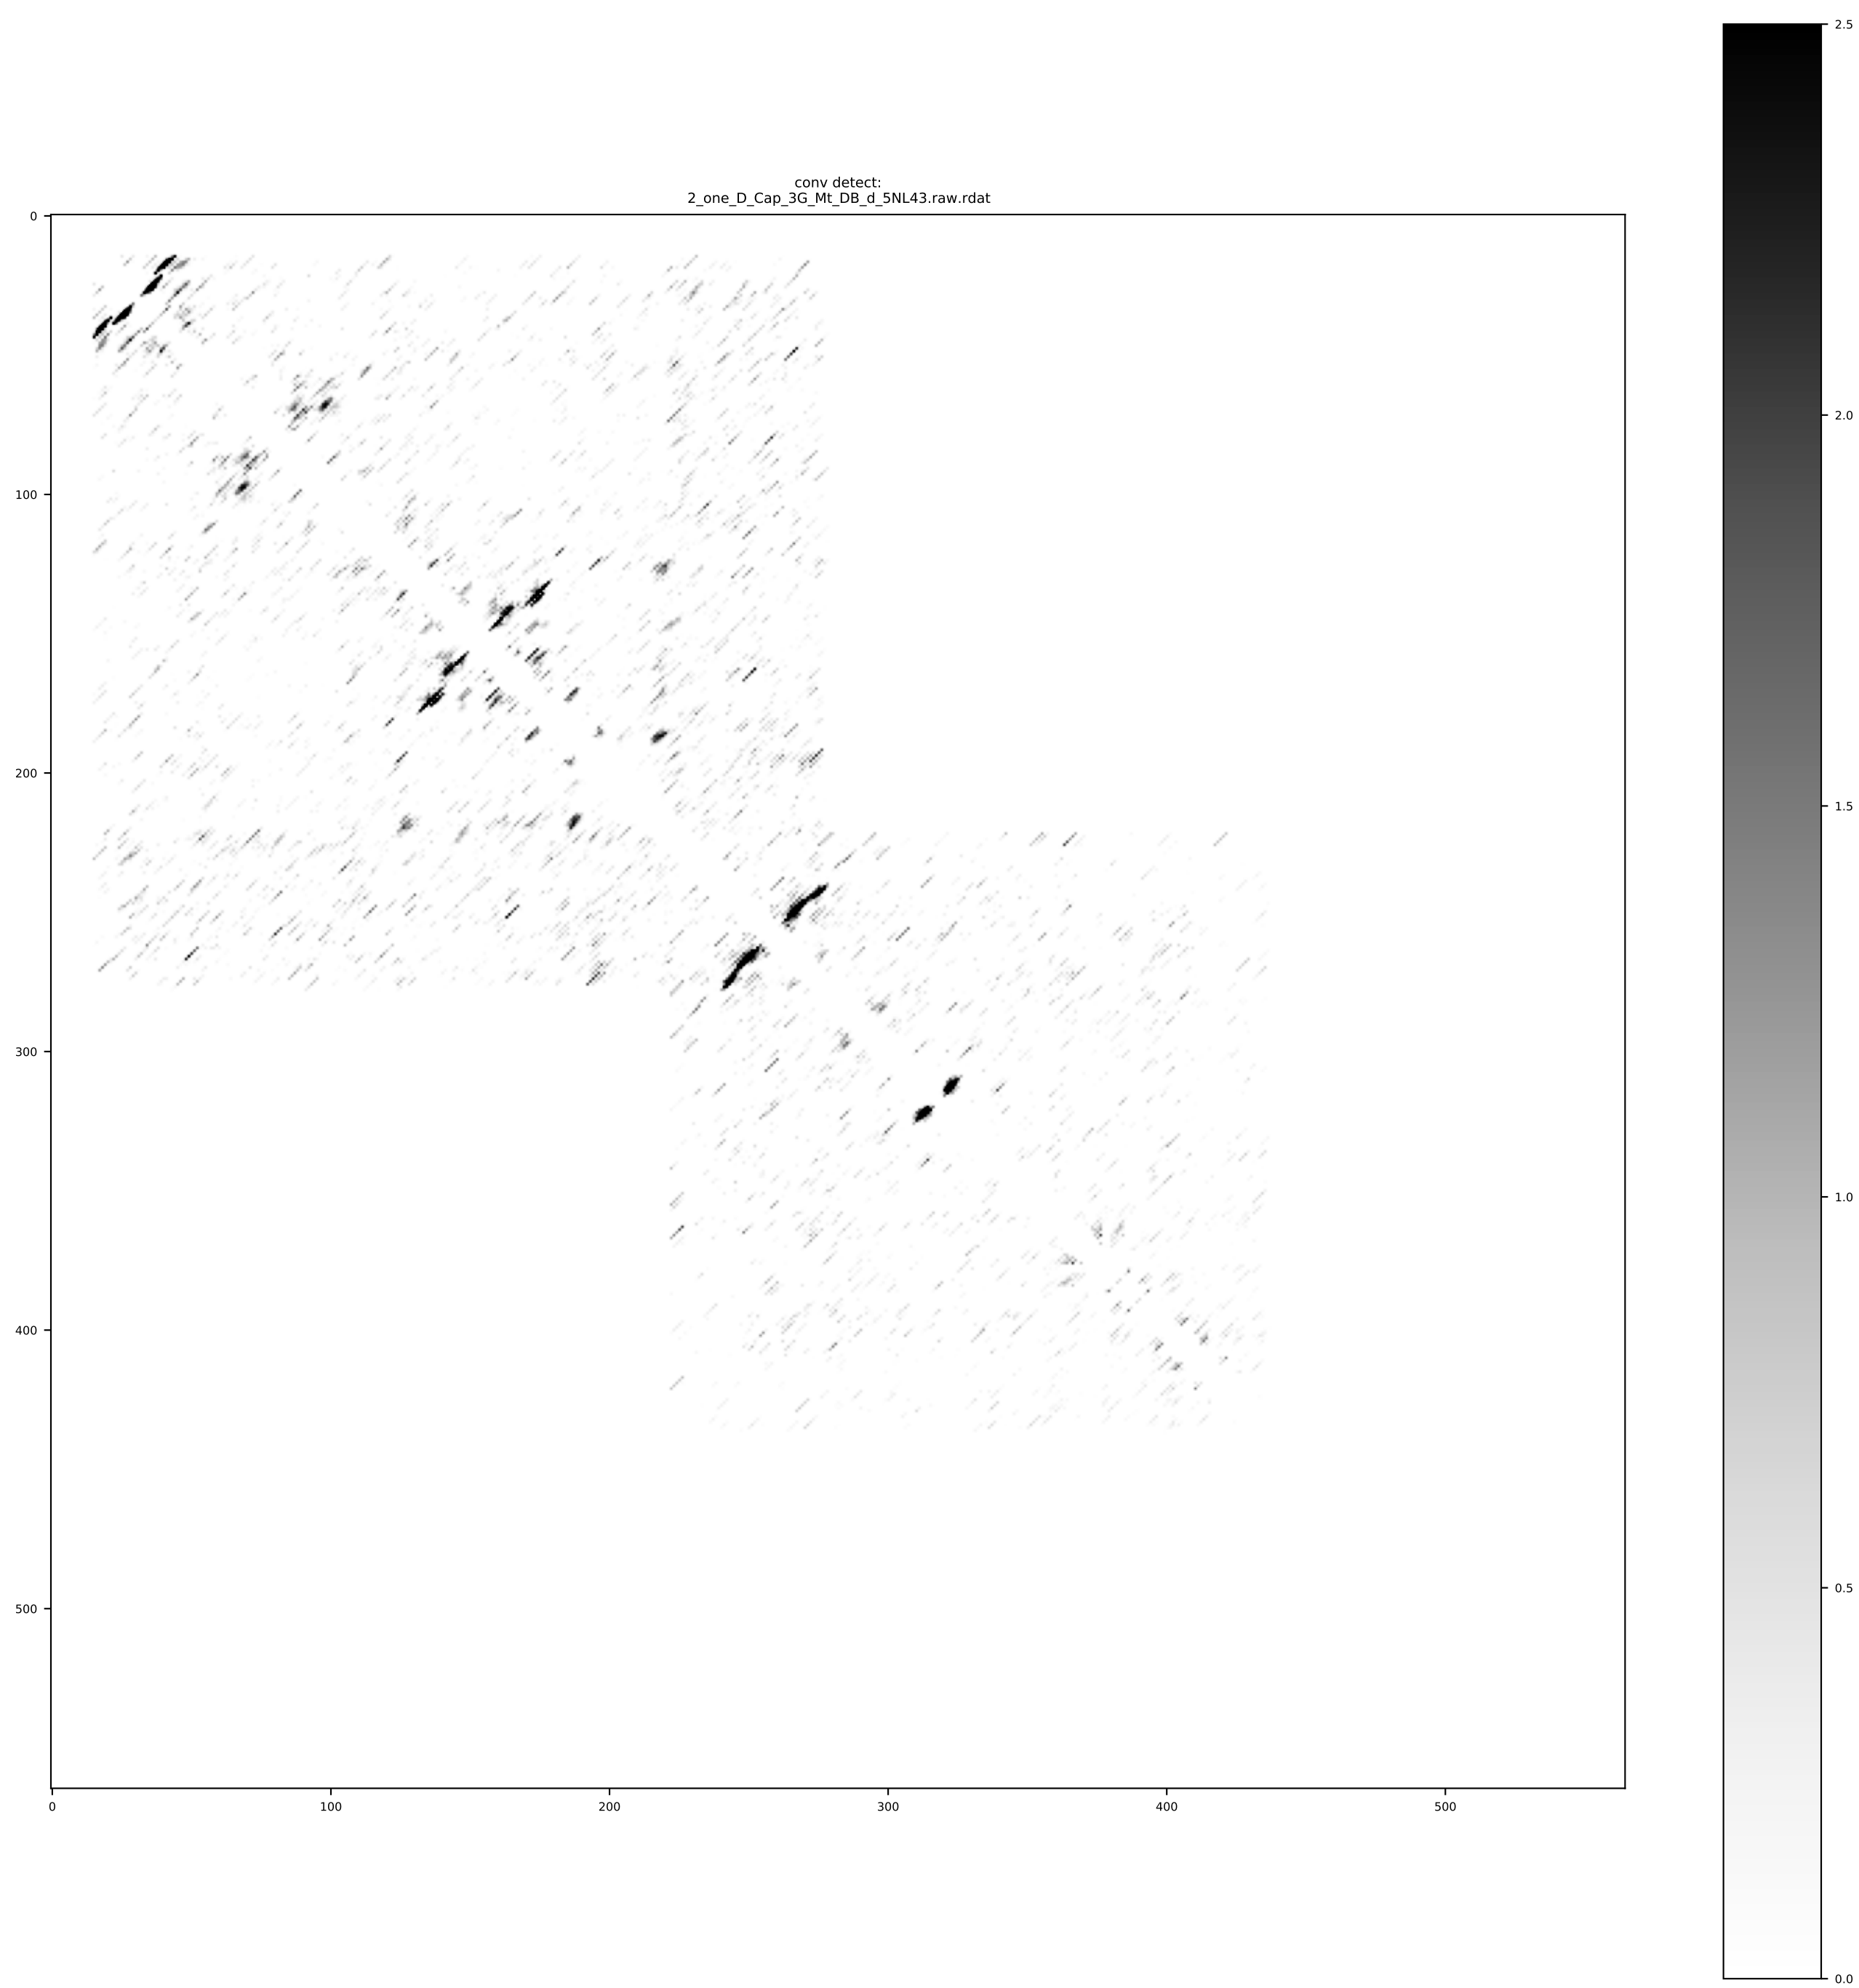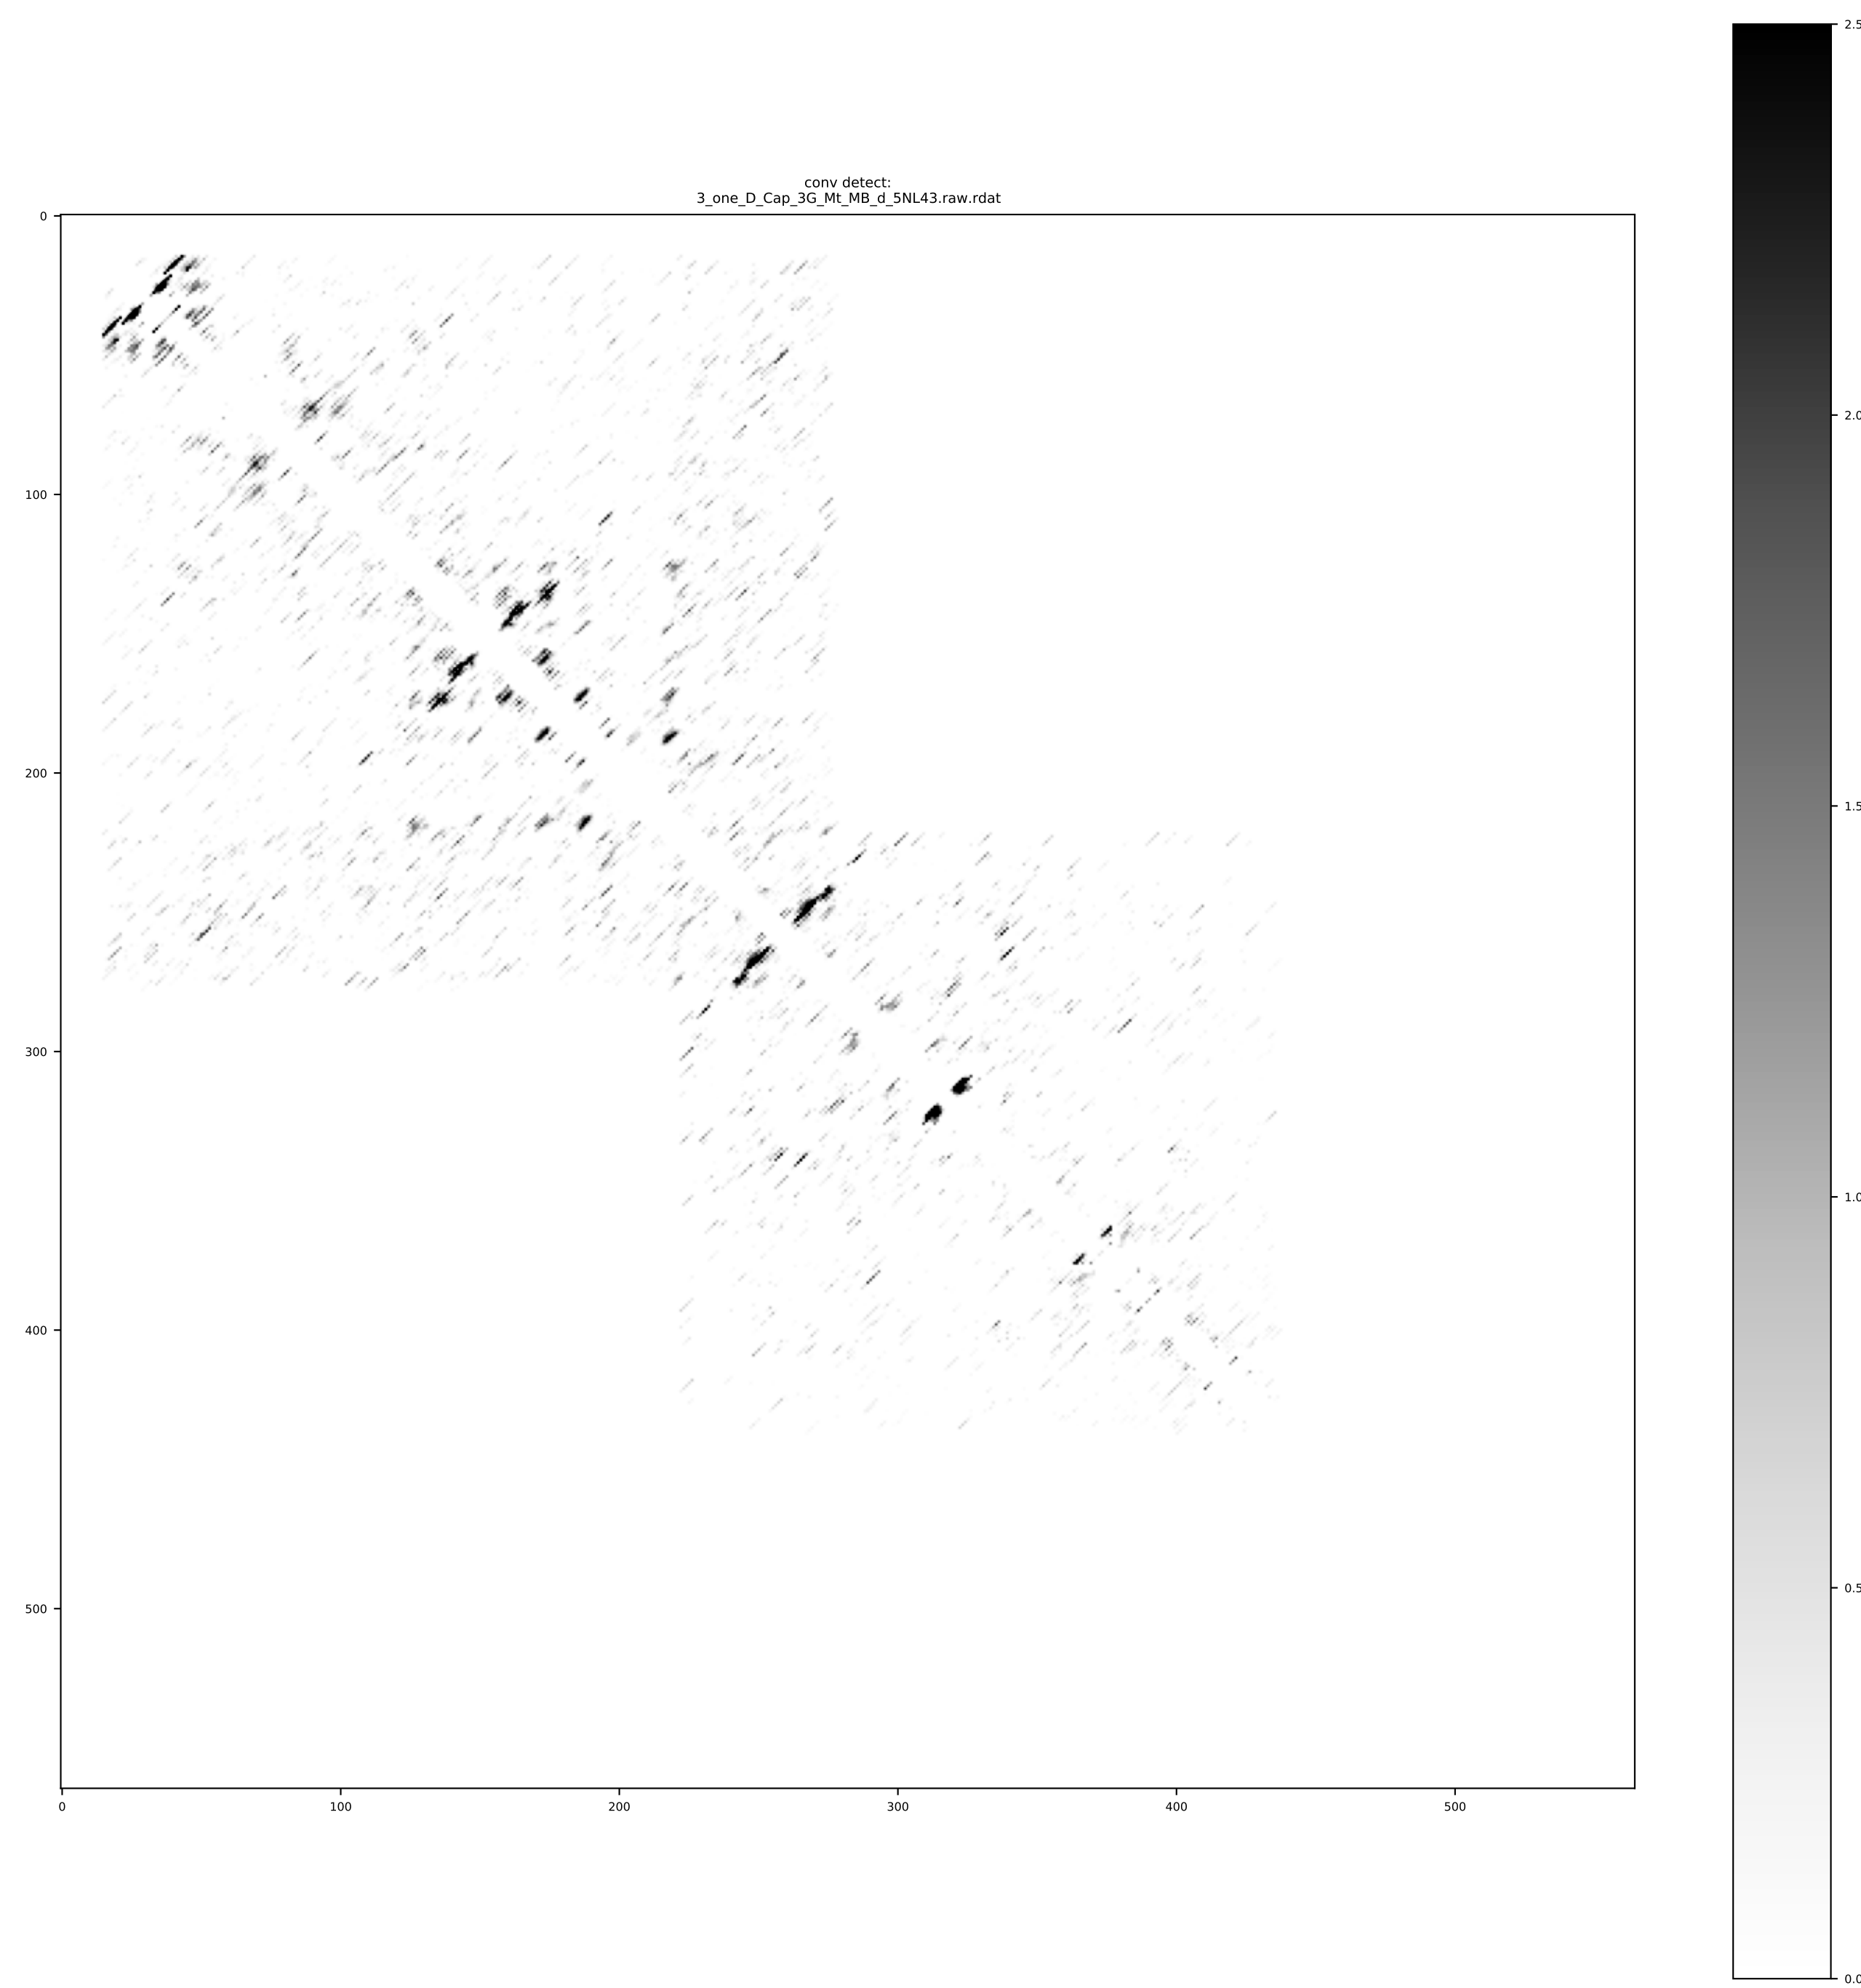

Supplement: Supplementary file 17 [file threeG_dimer_conv_filter.pdf › 2d-structure-inference/convolution_filtered/threeG_dimer_conv_filter.pdf]

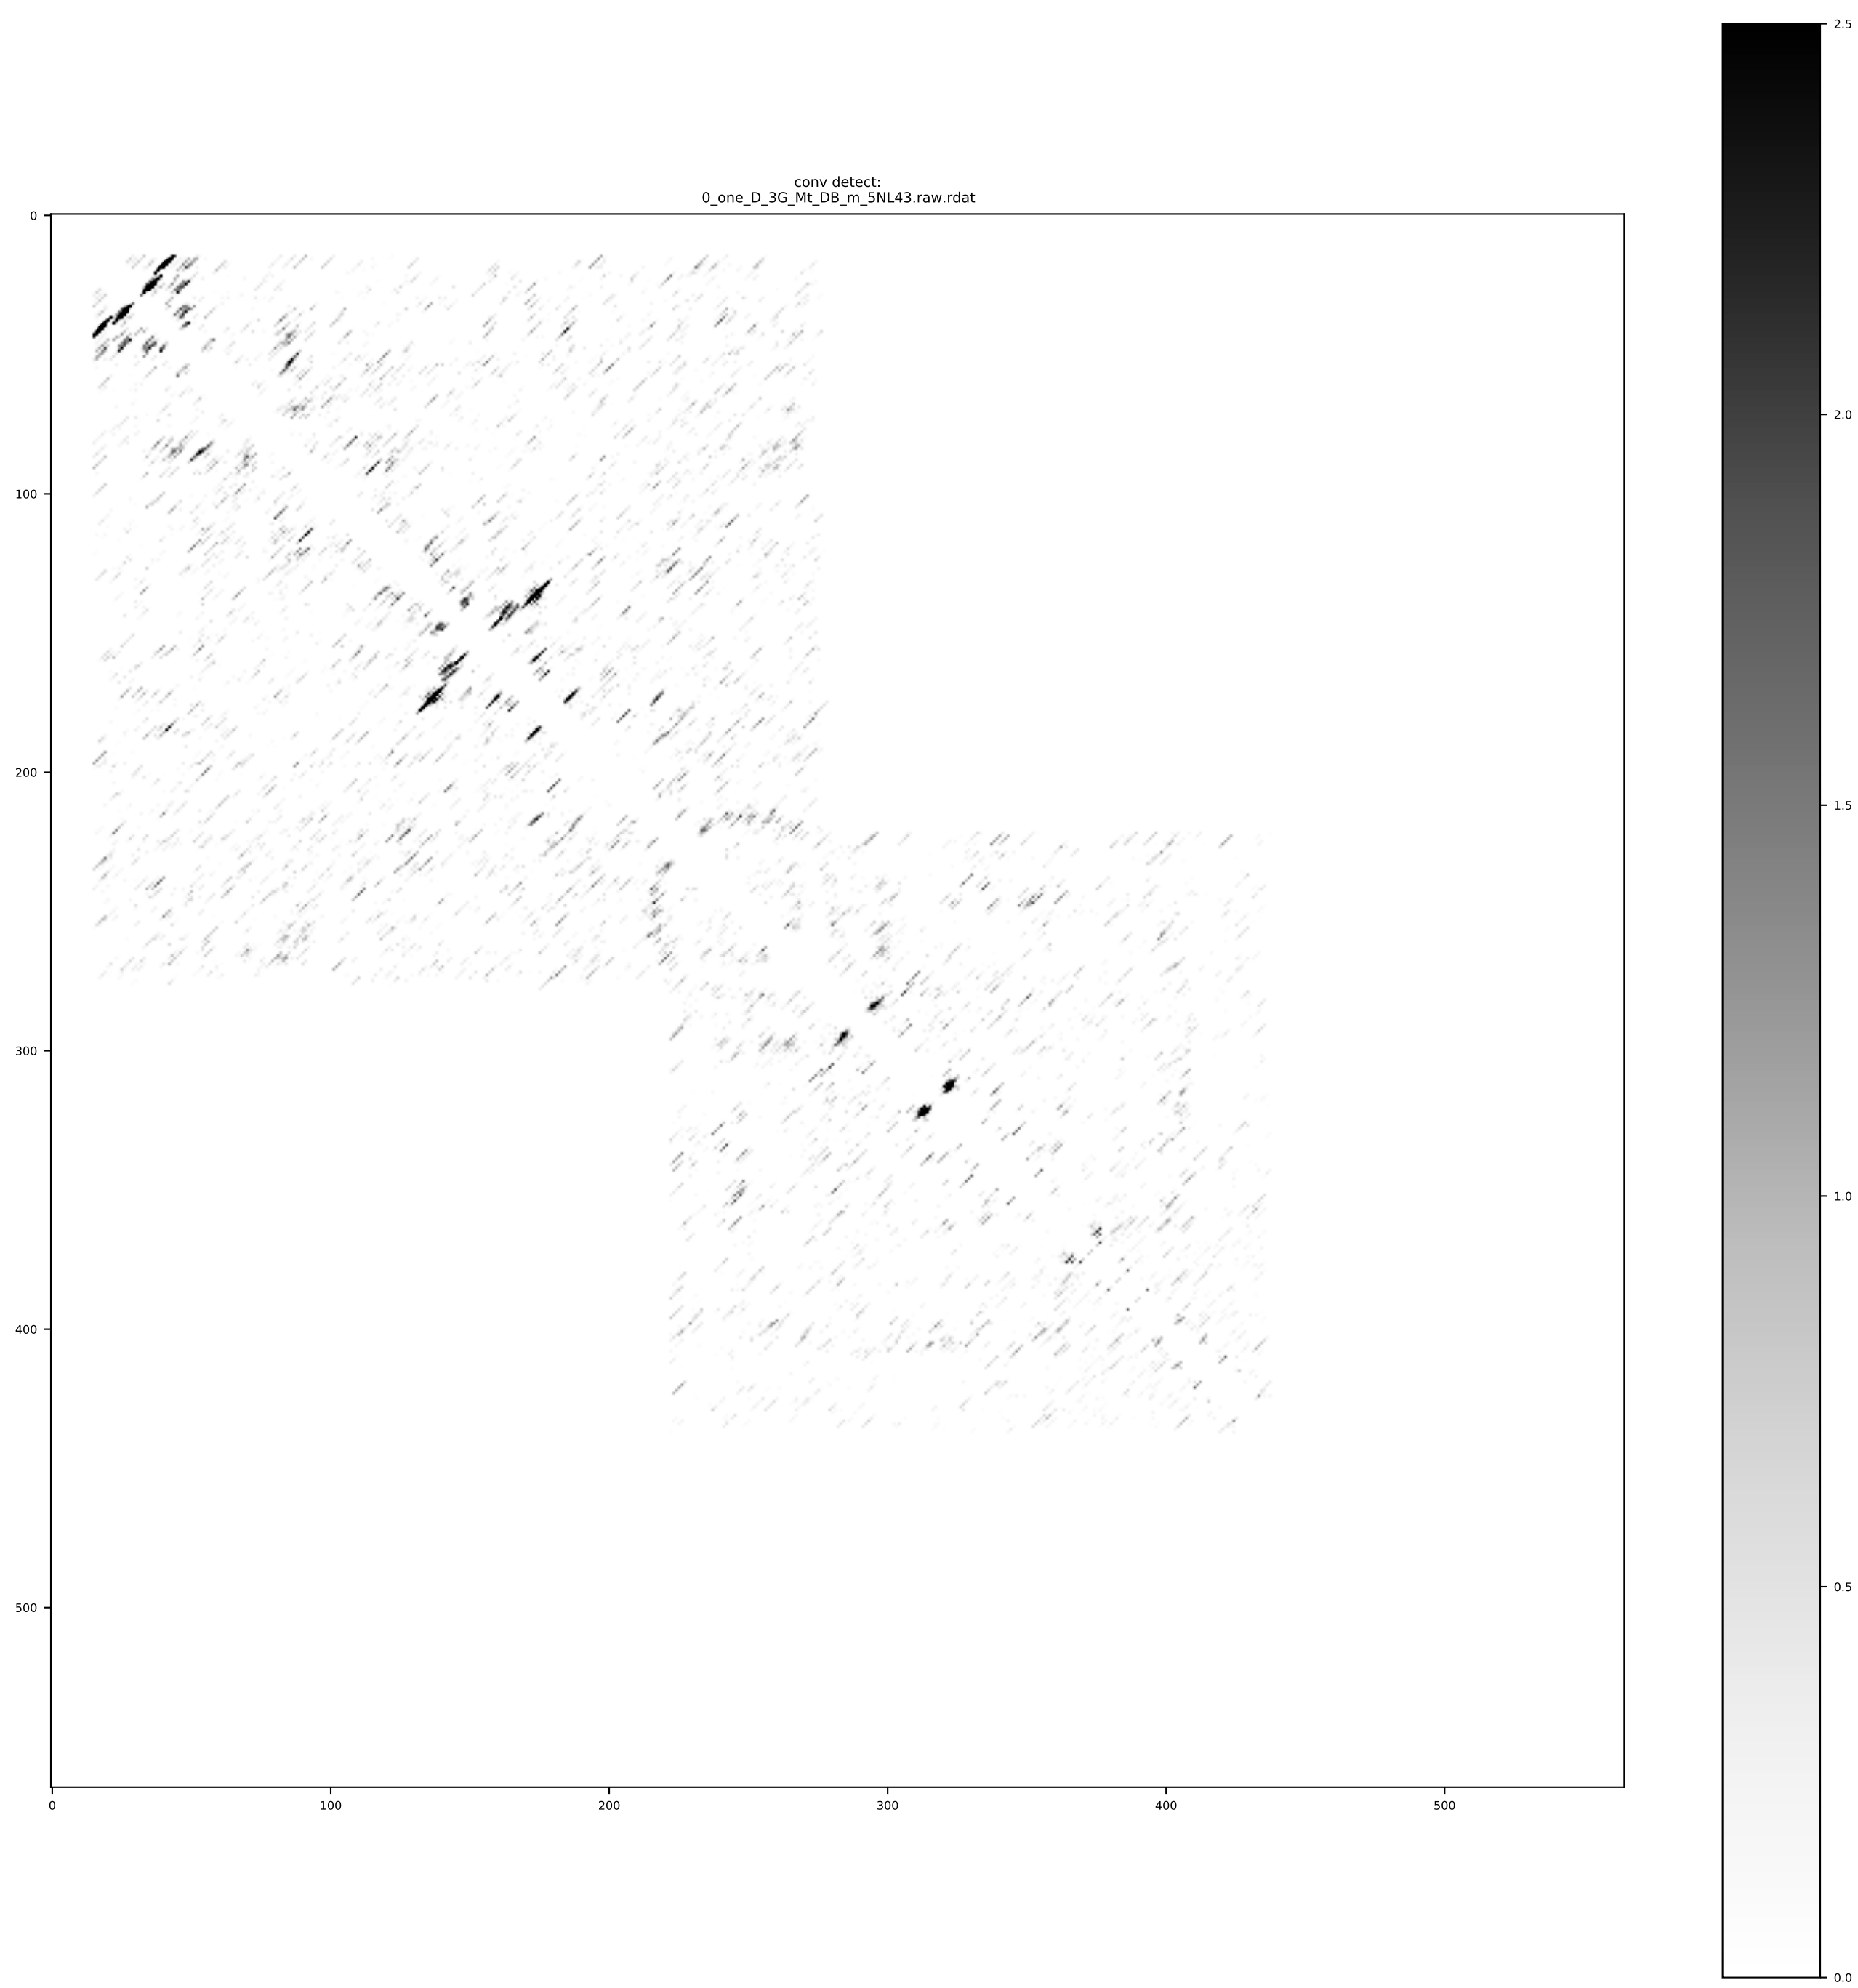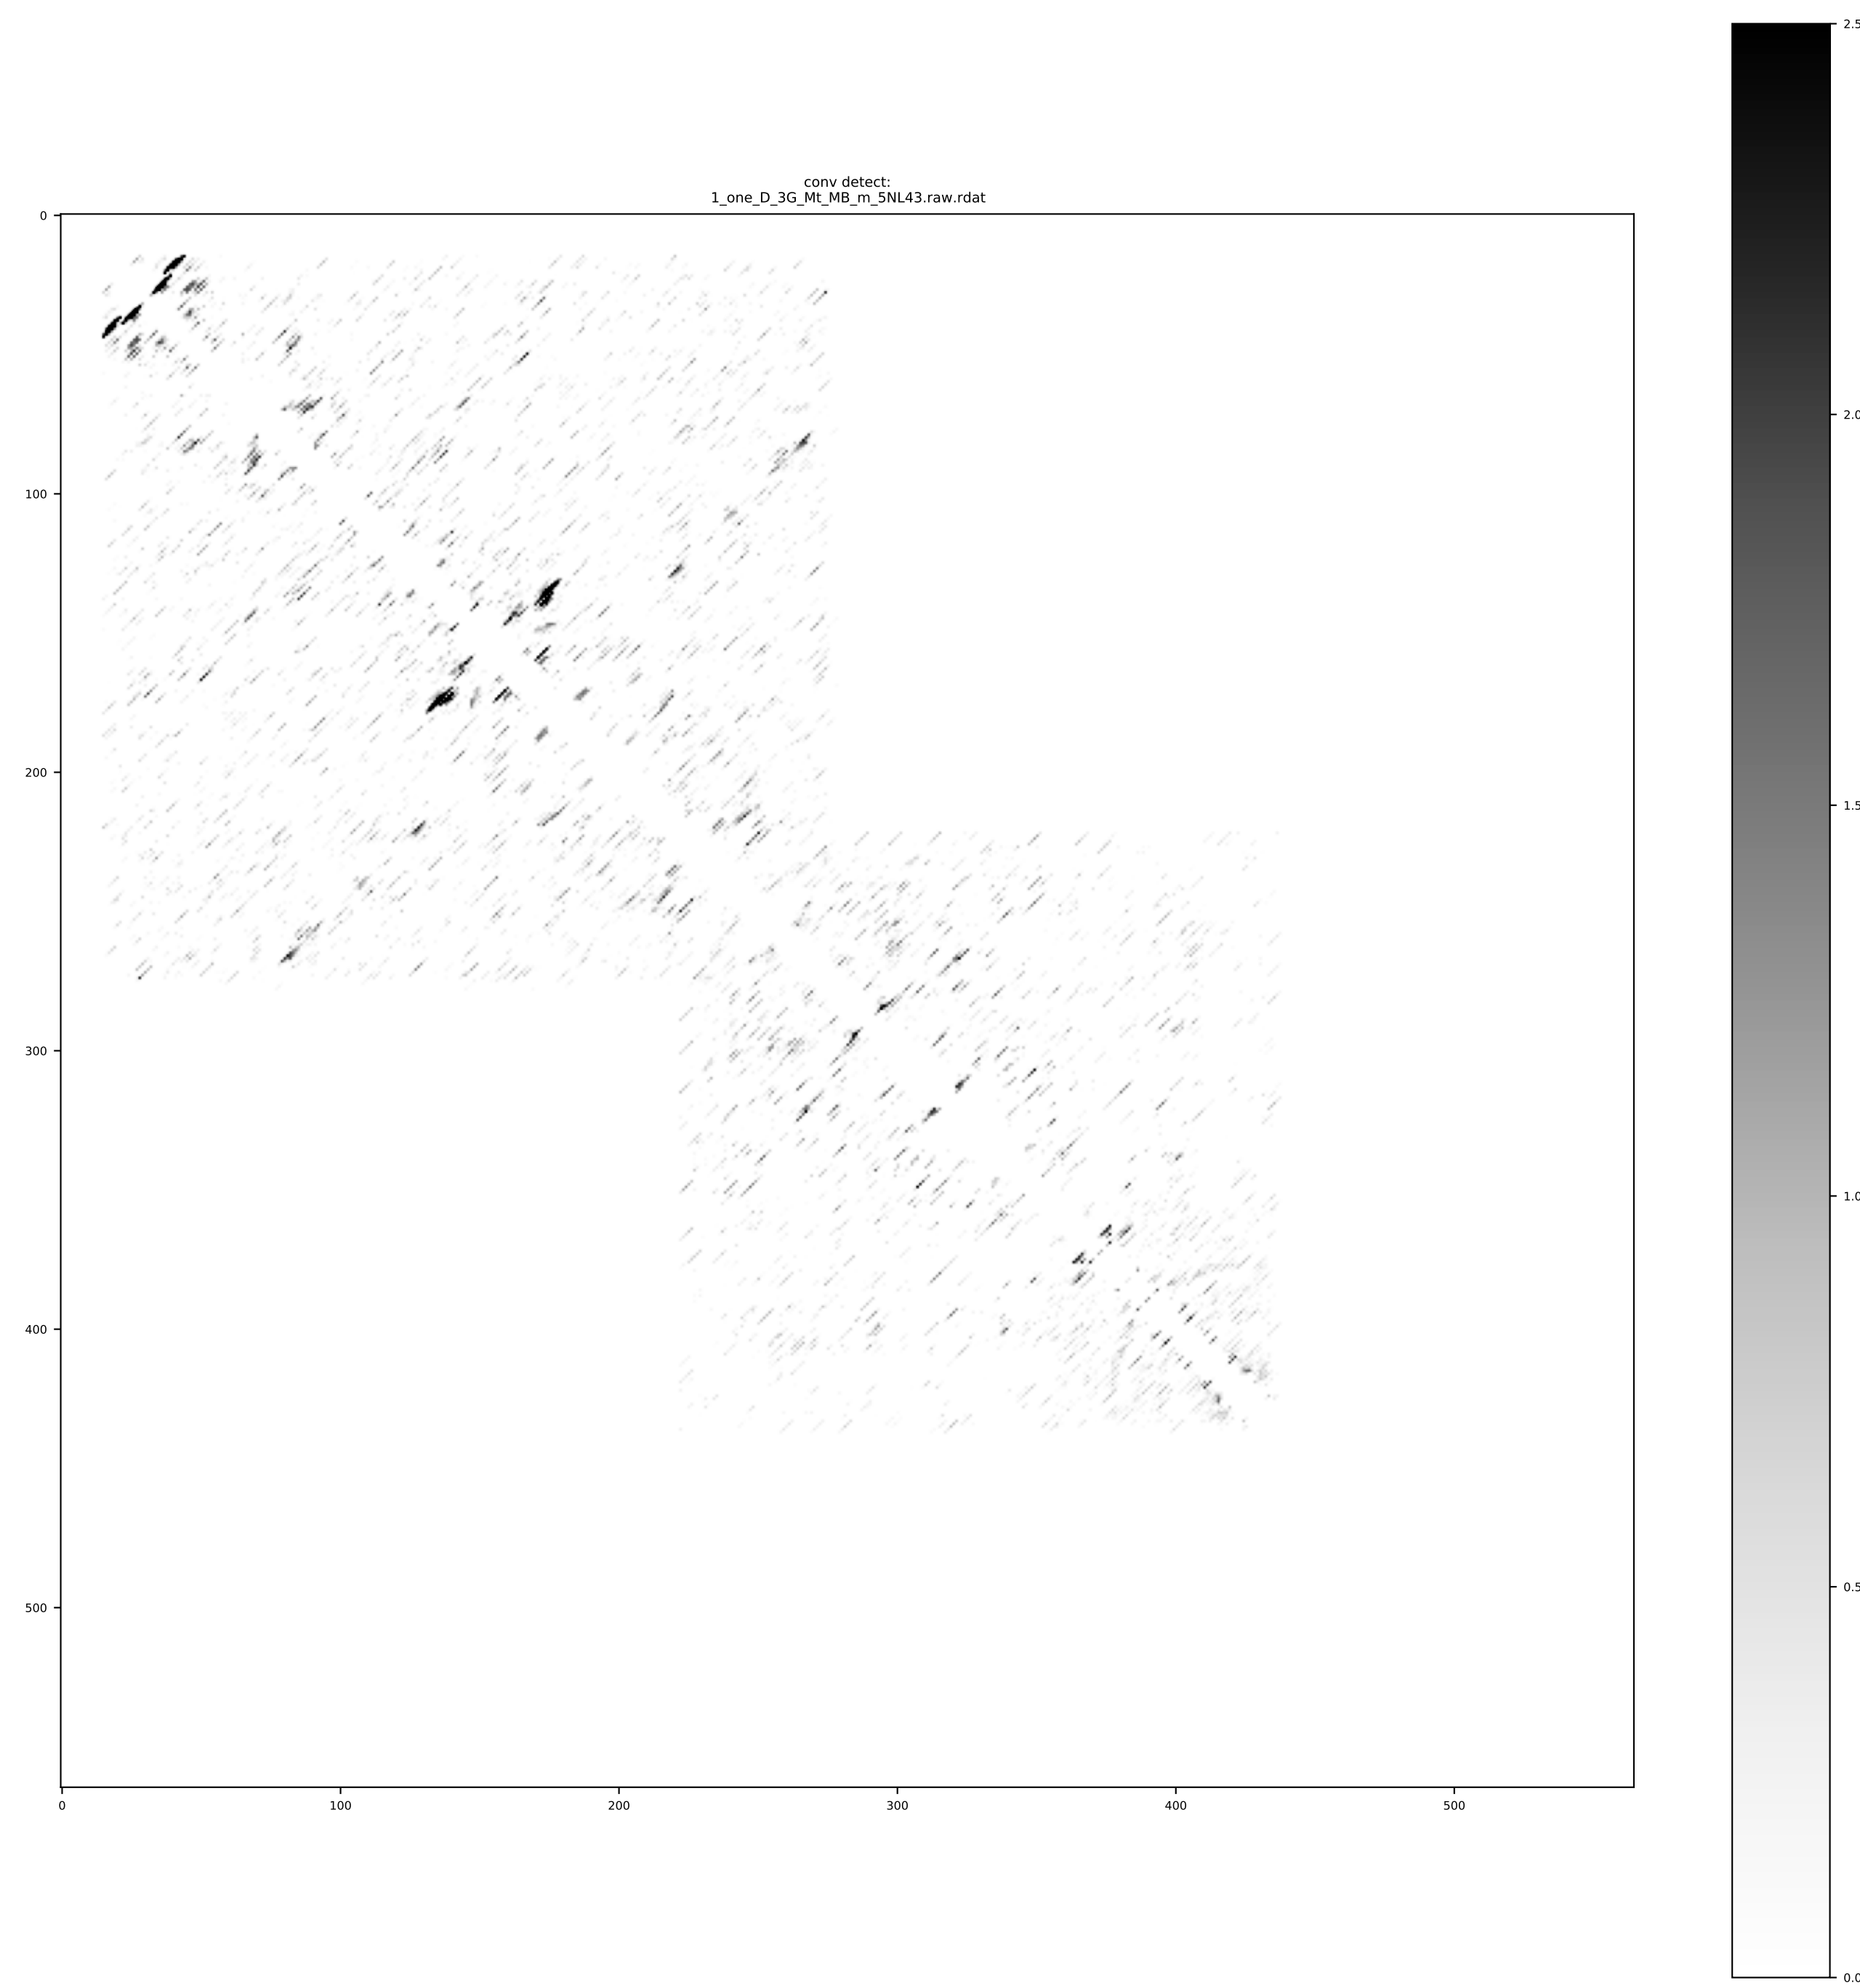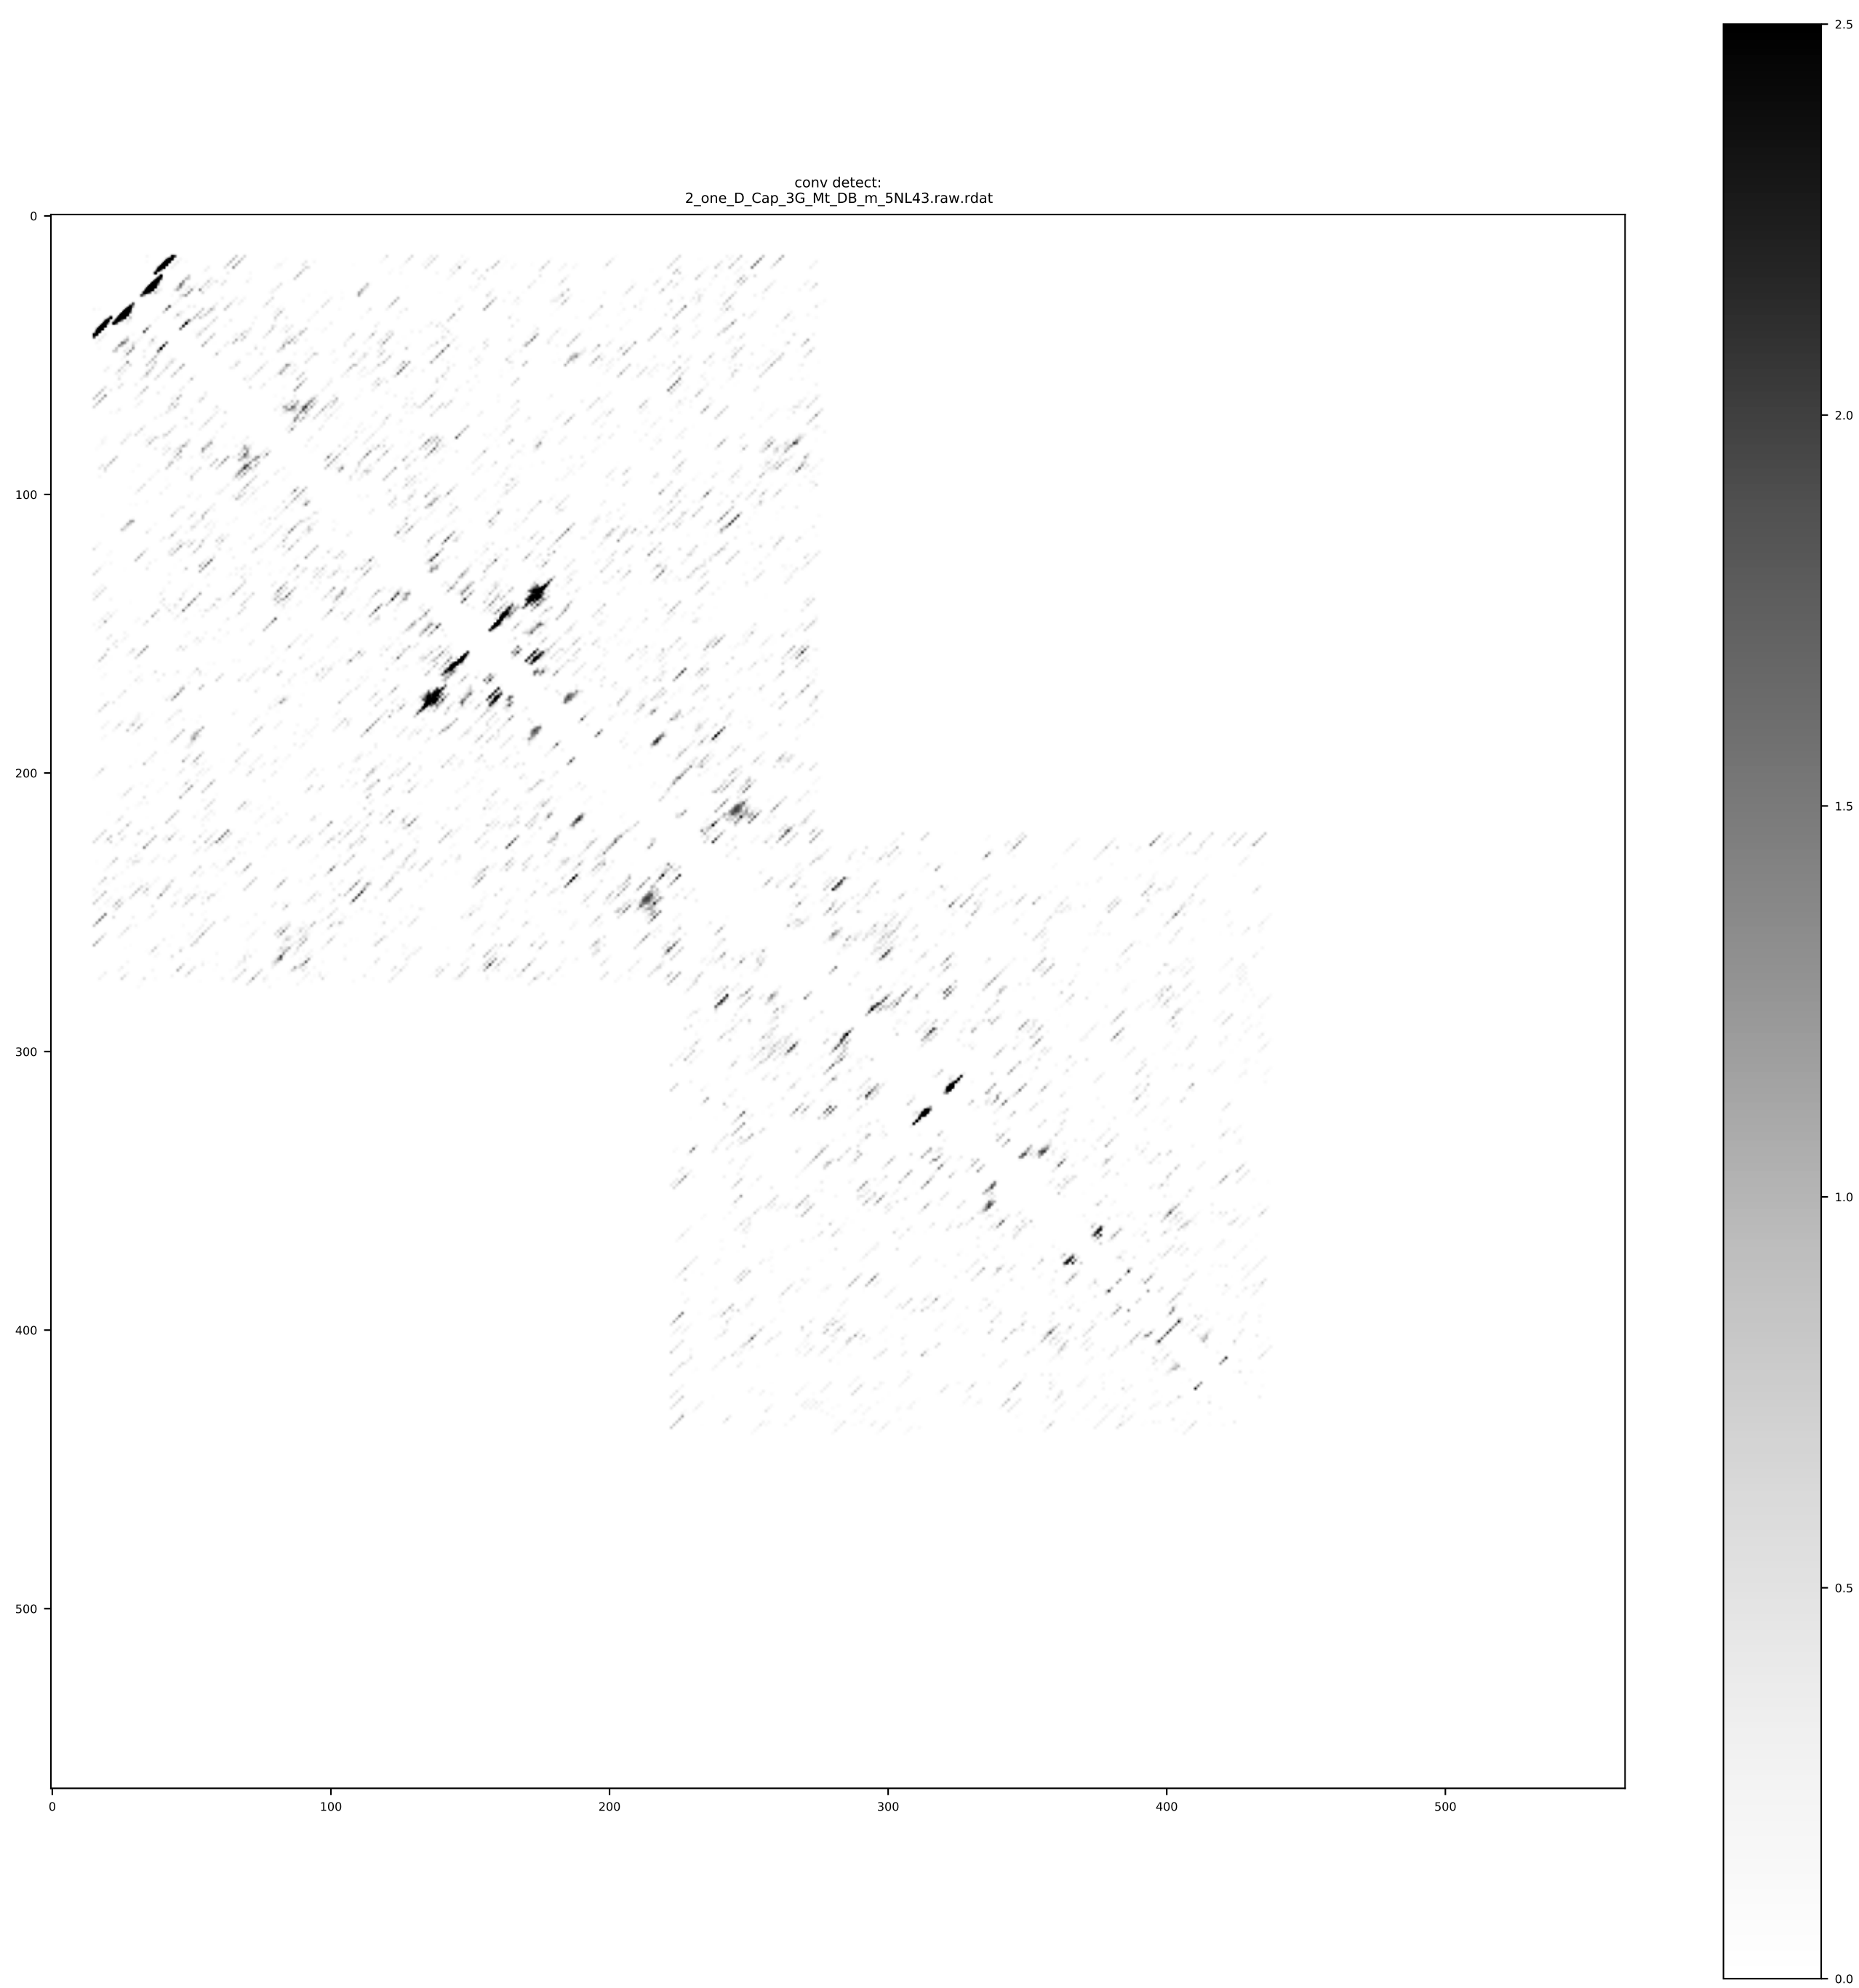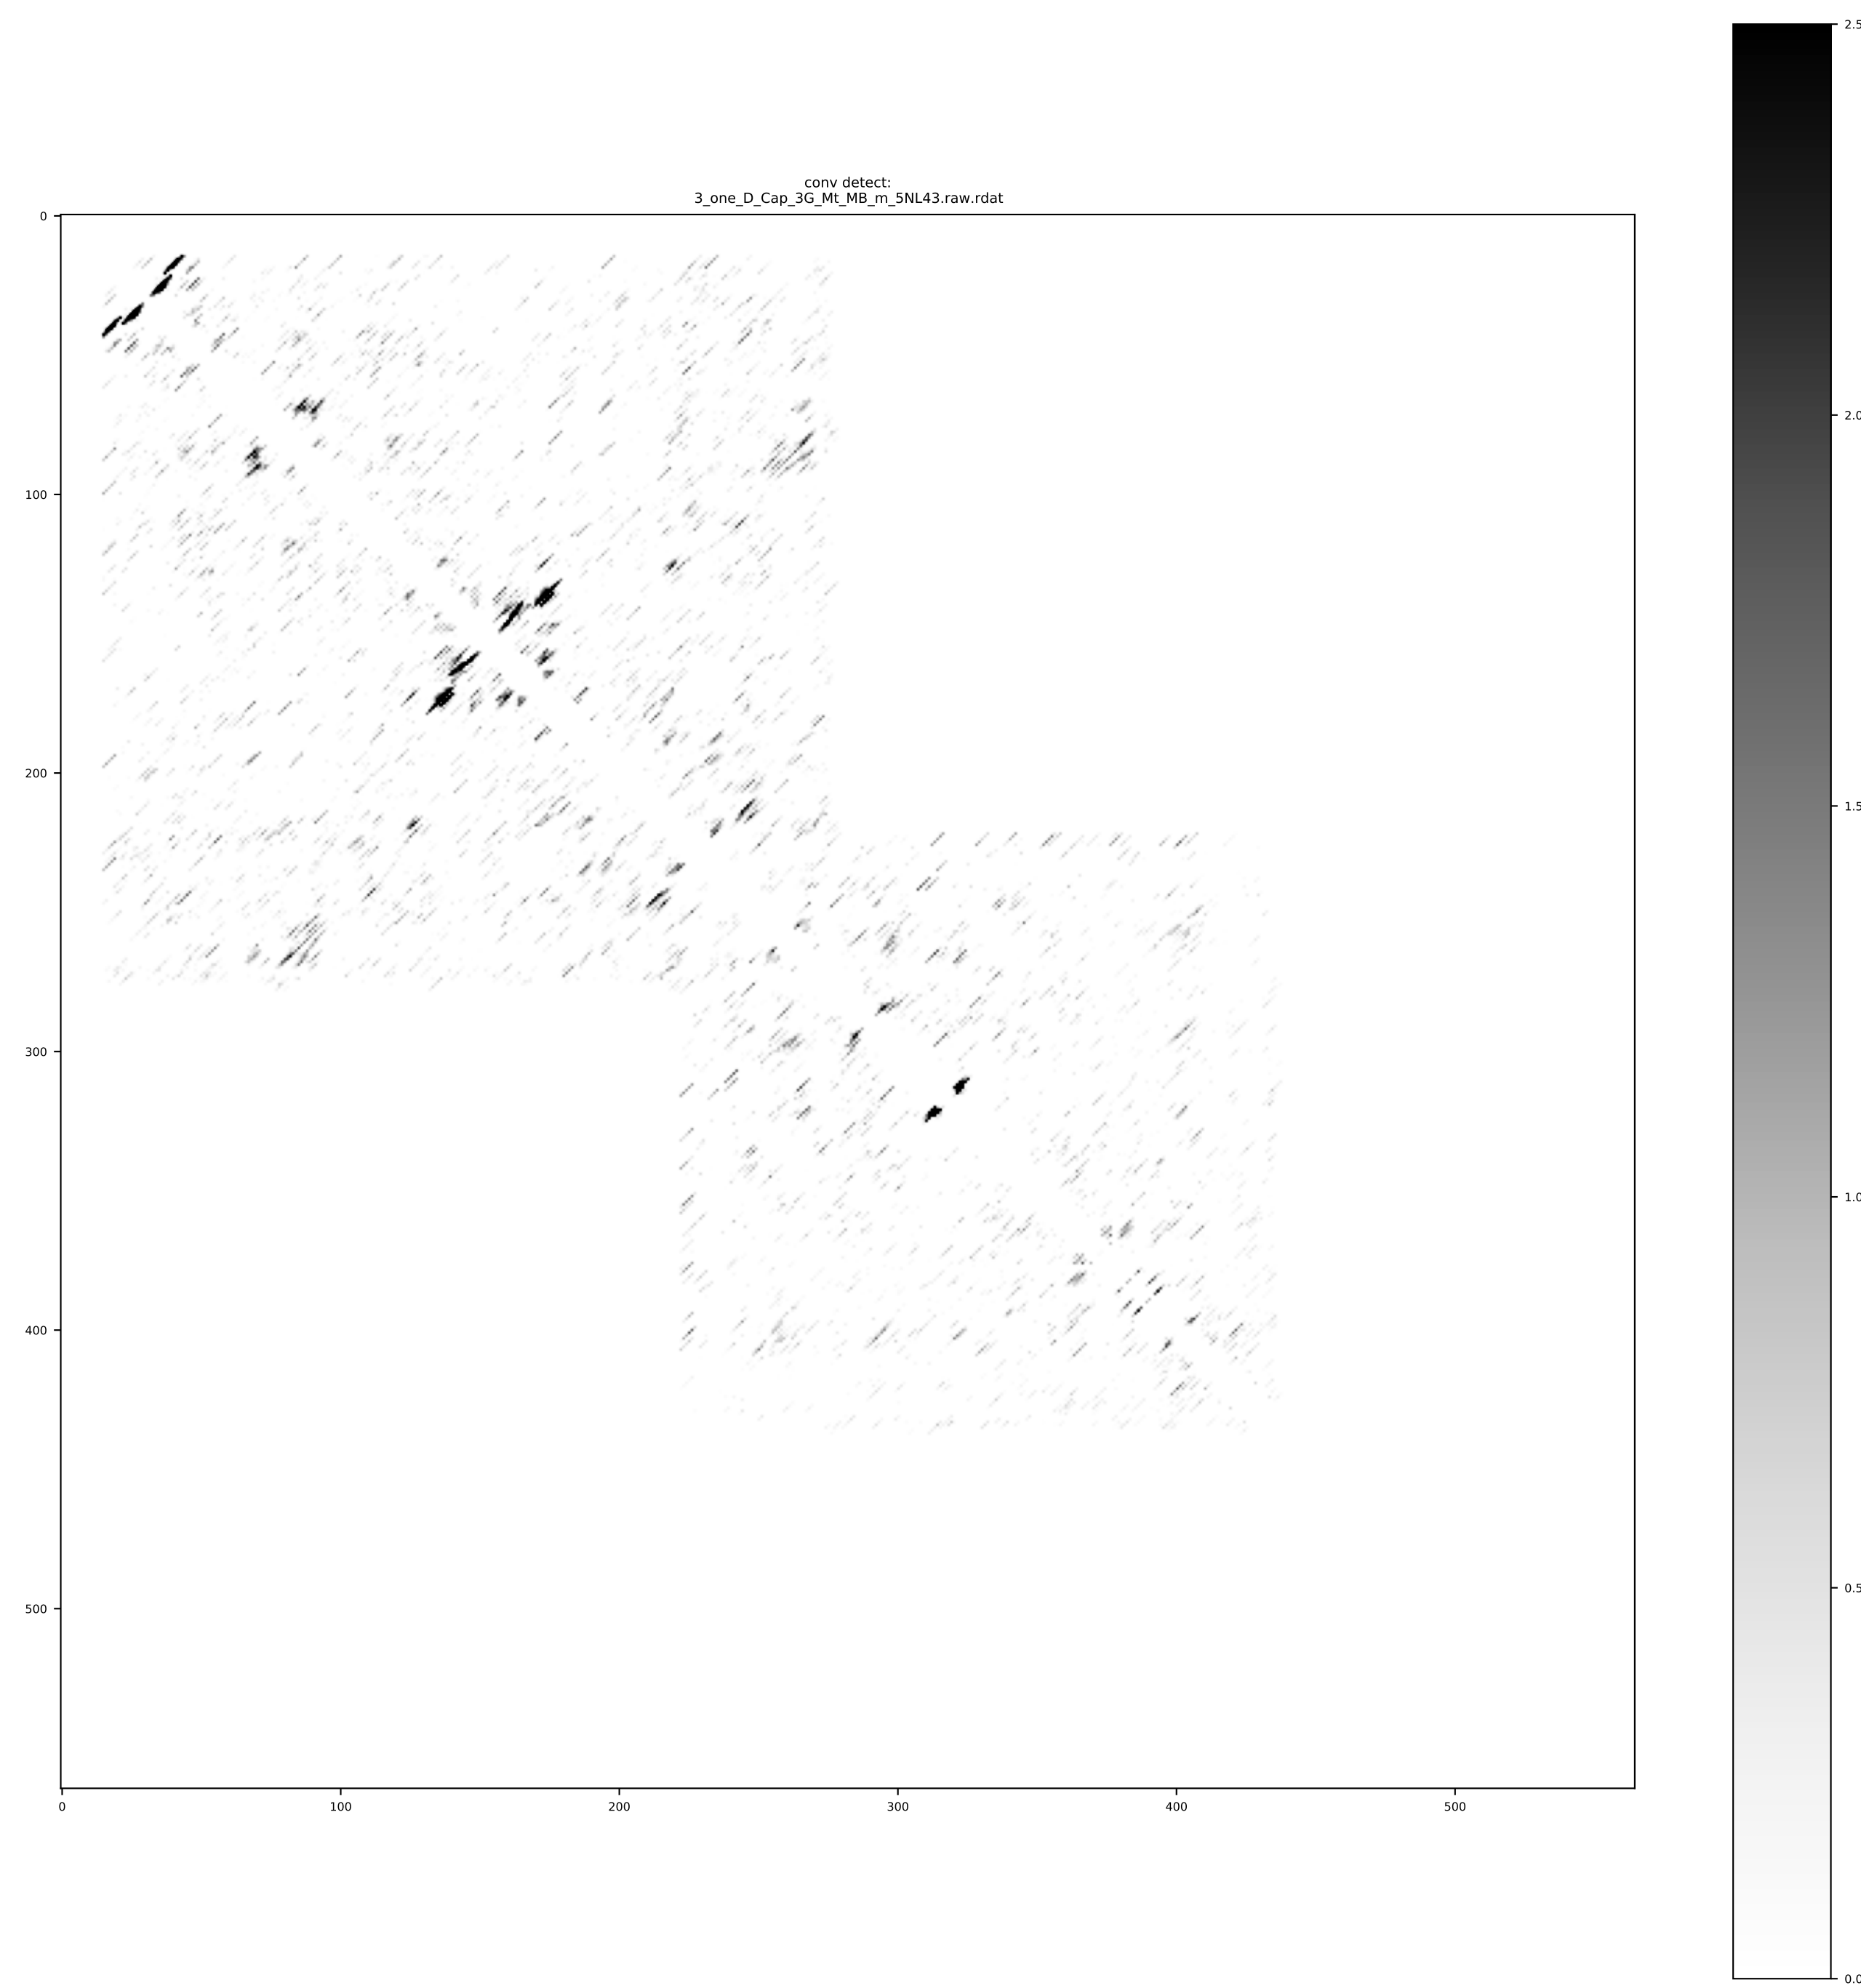

Supplement: Supplementary file 18 [file threeG_monomer_conv_filter.pdf › 2d-structure-inference/convolution_filtered/threeG_monomer_conv_filter.pdf]

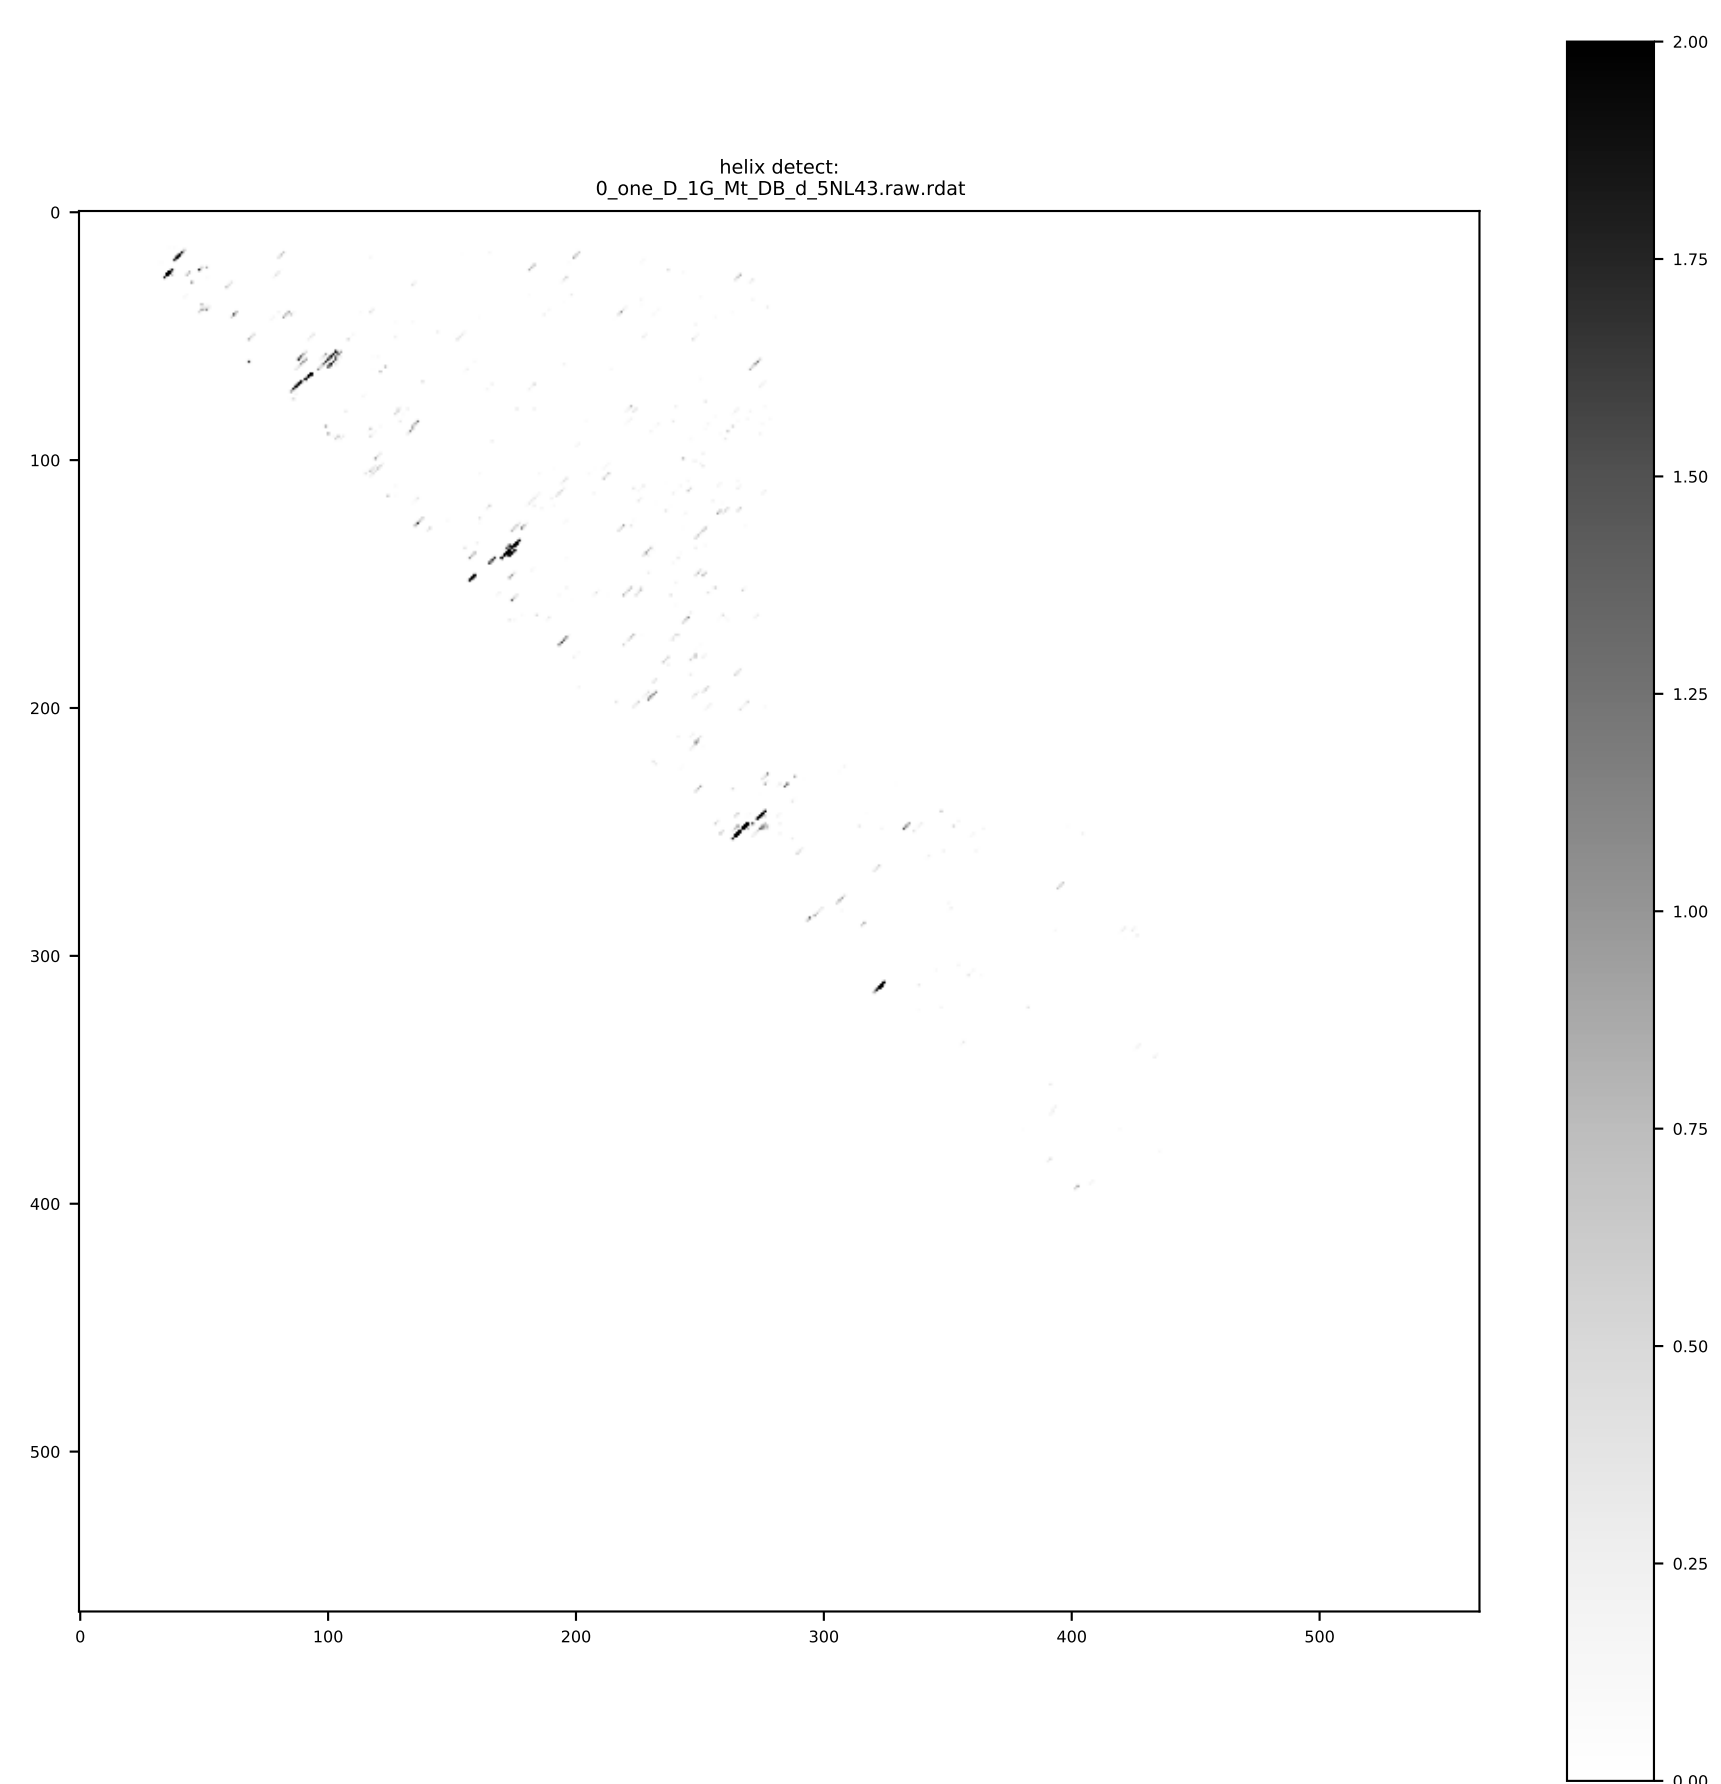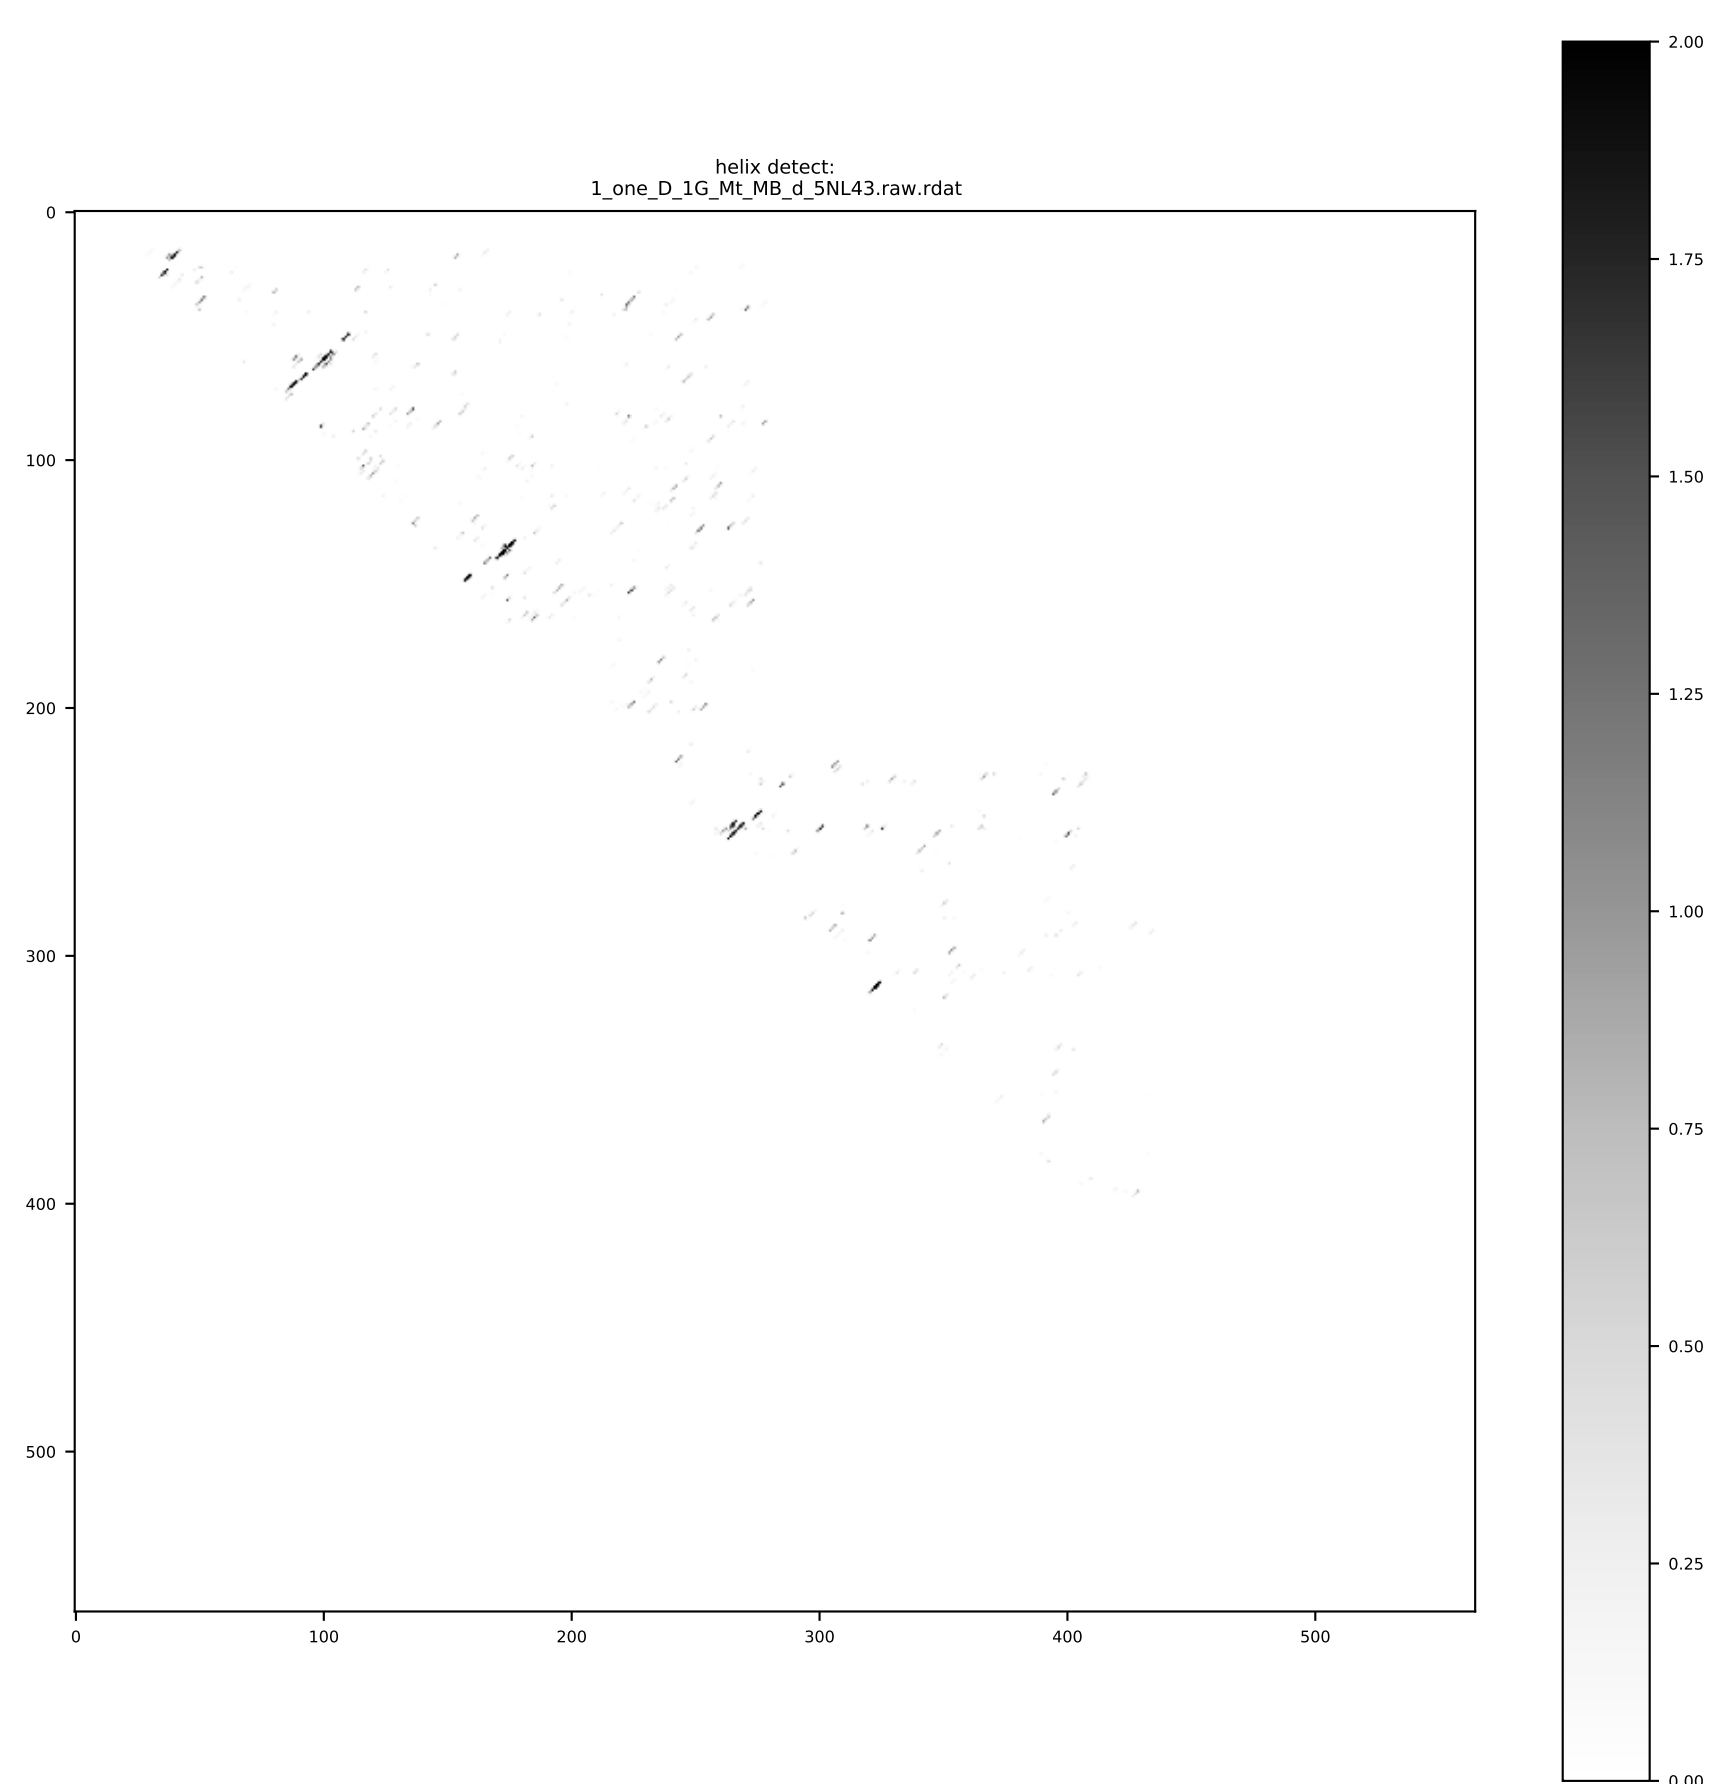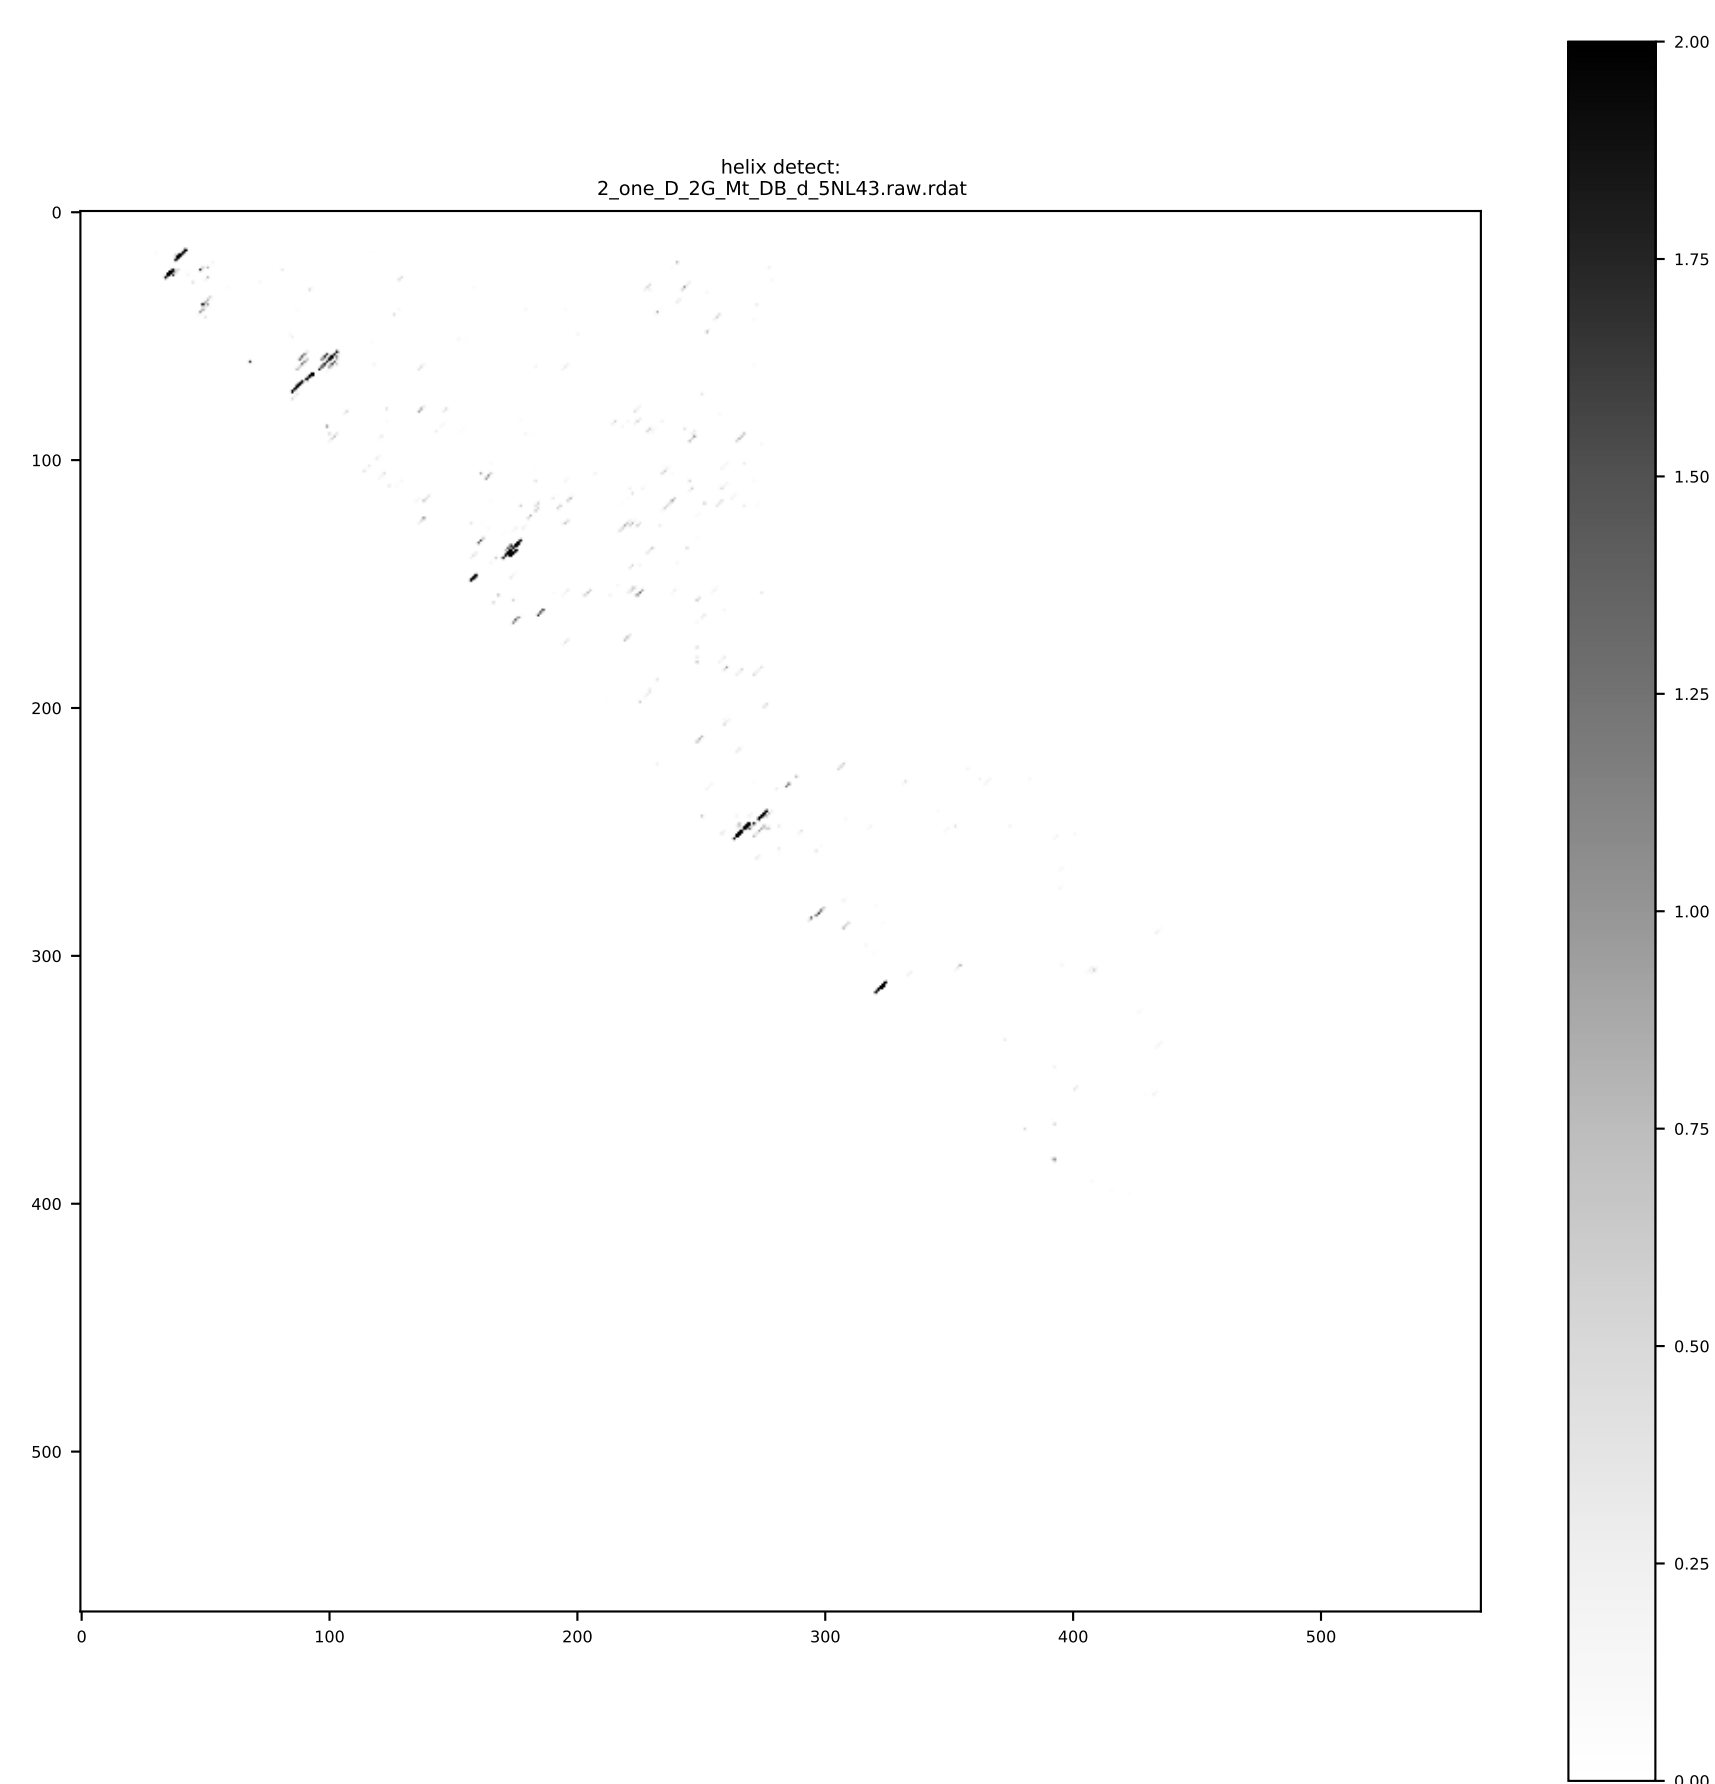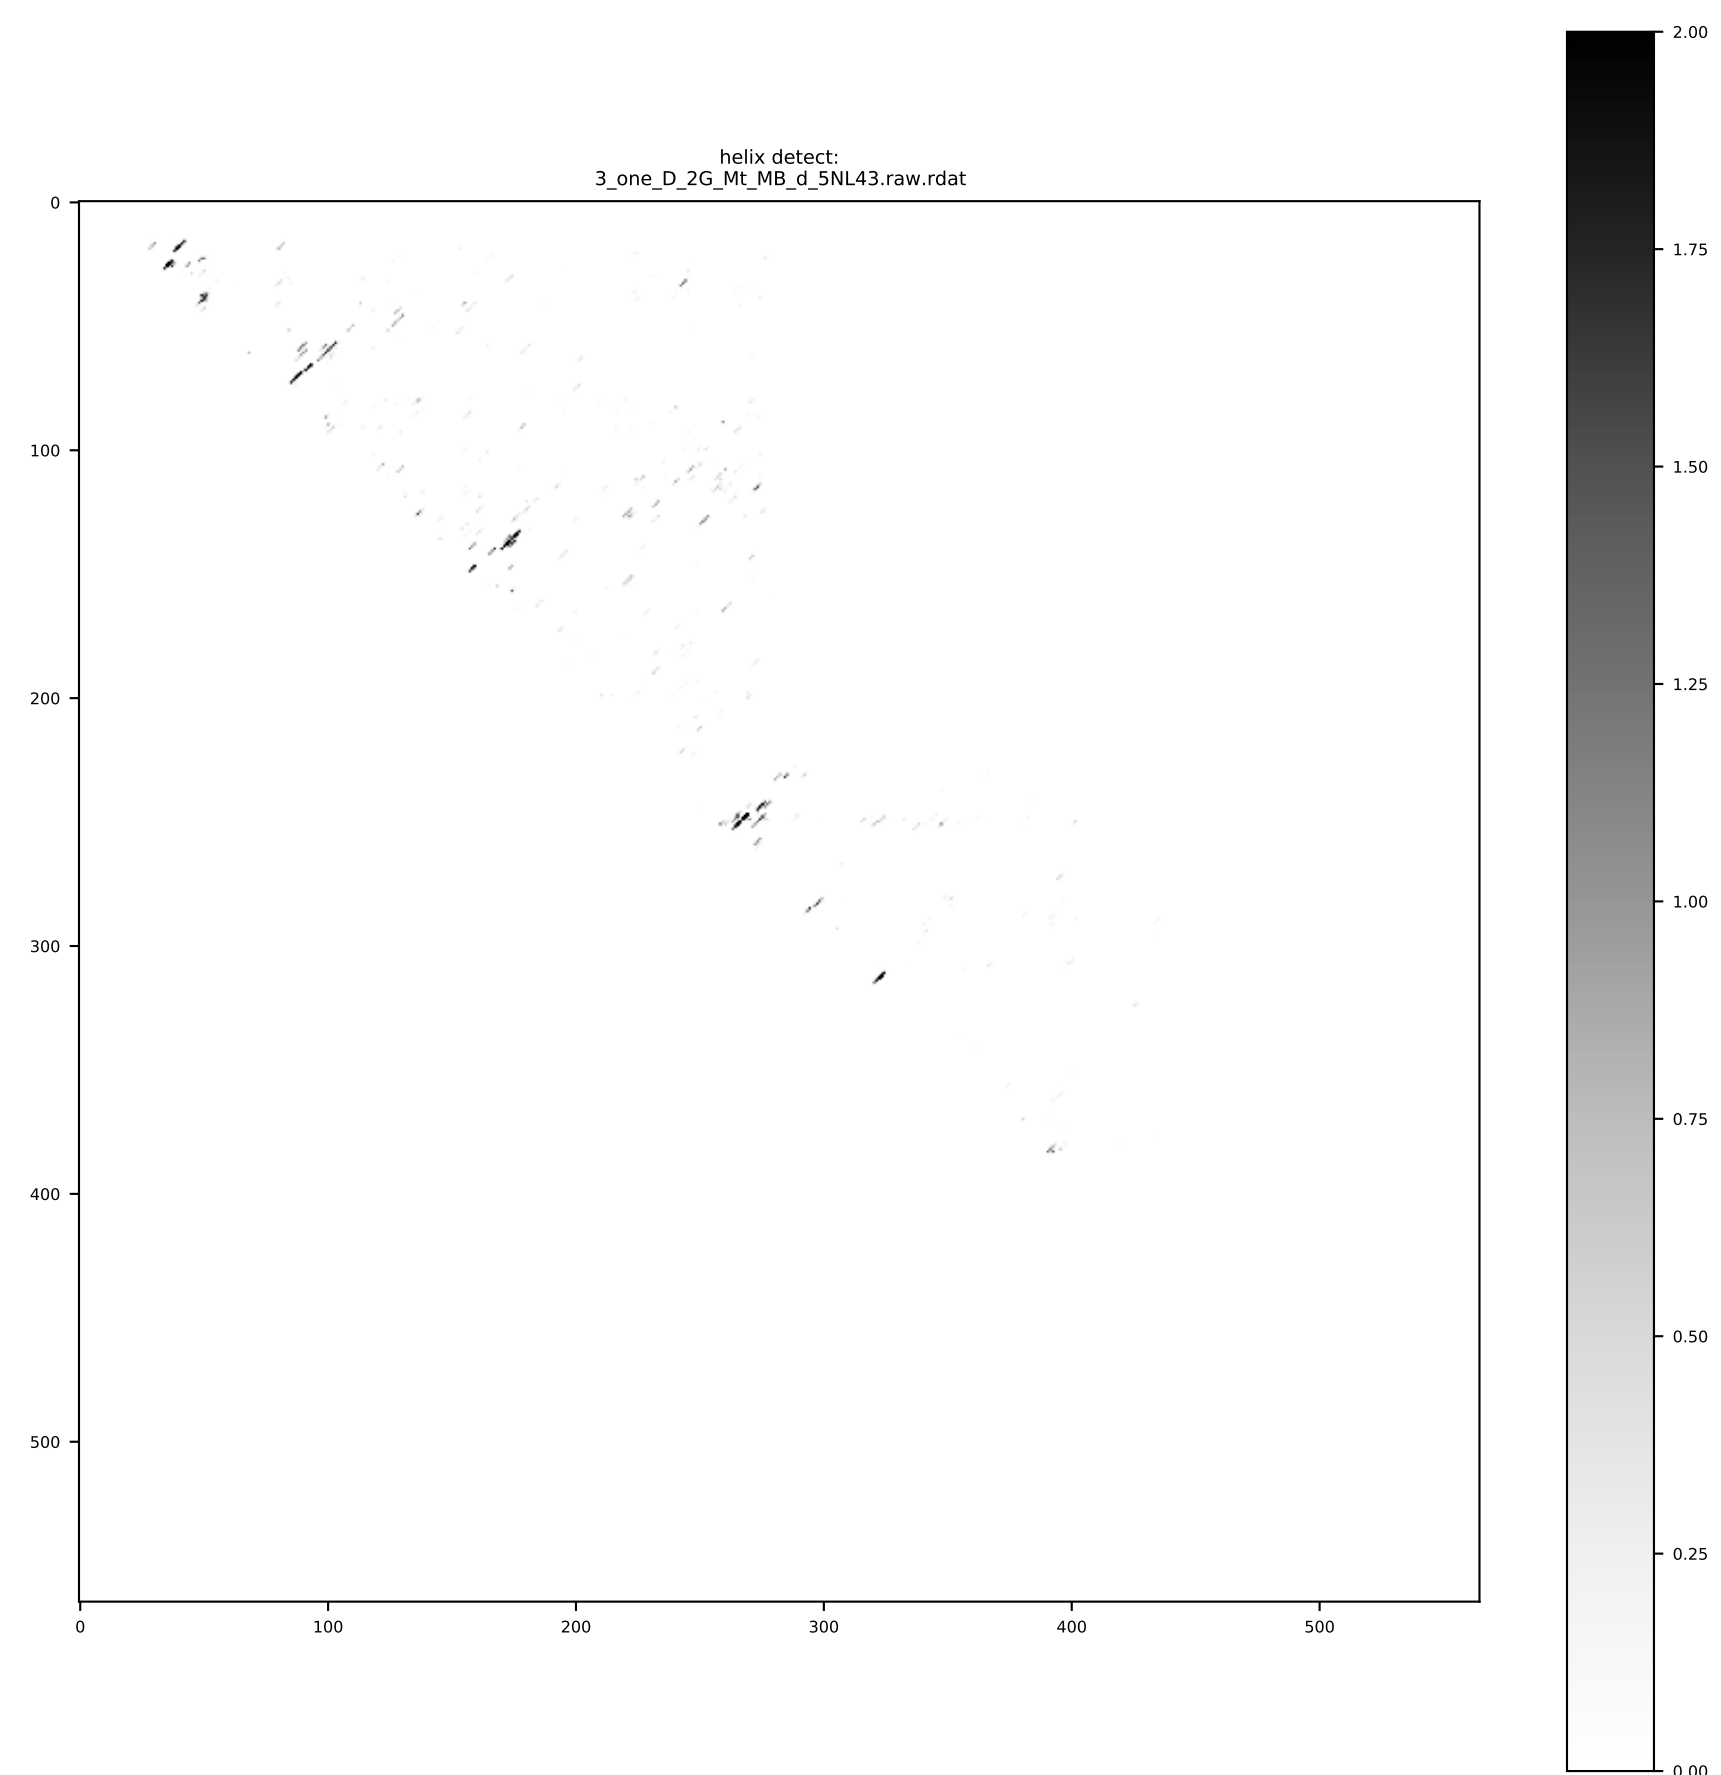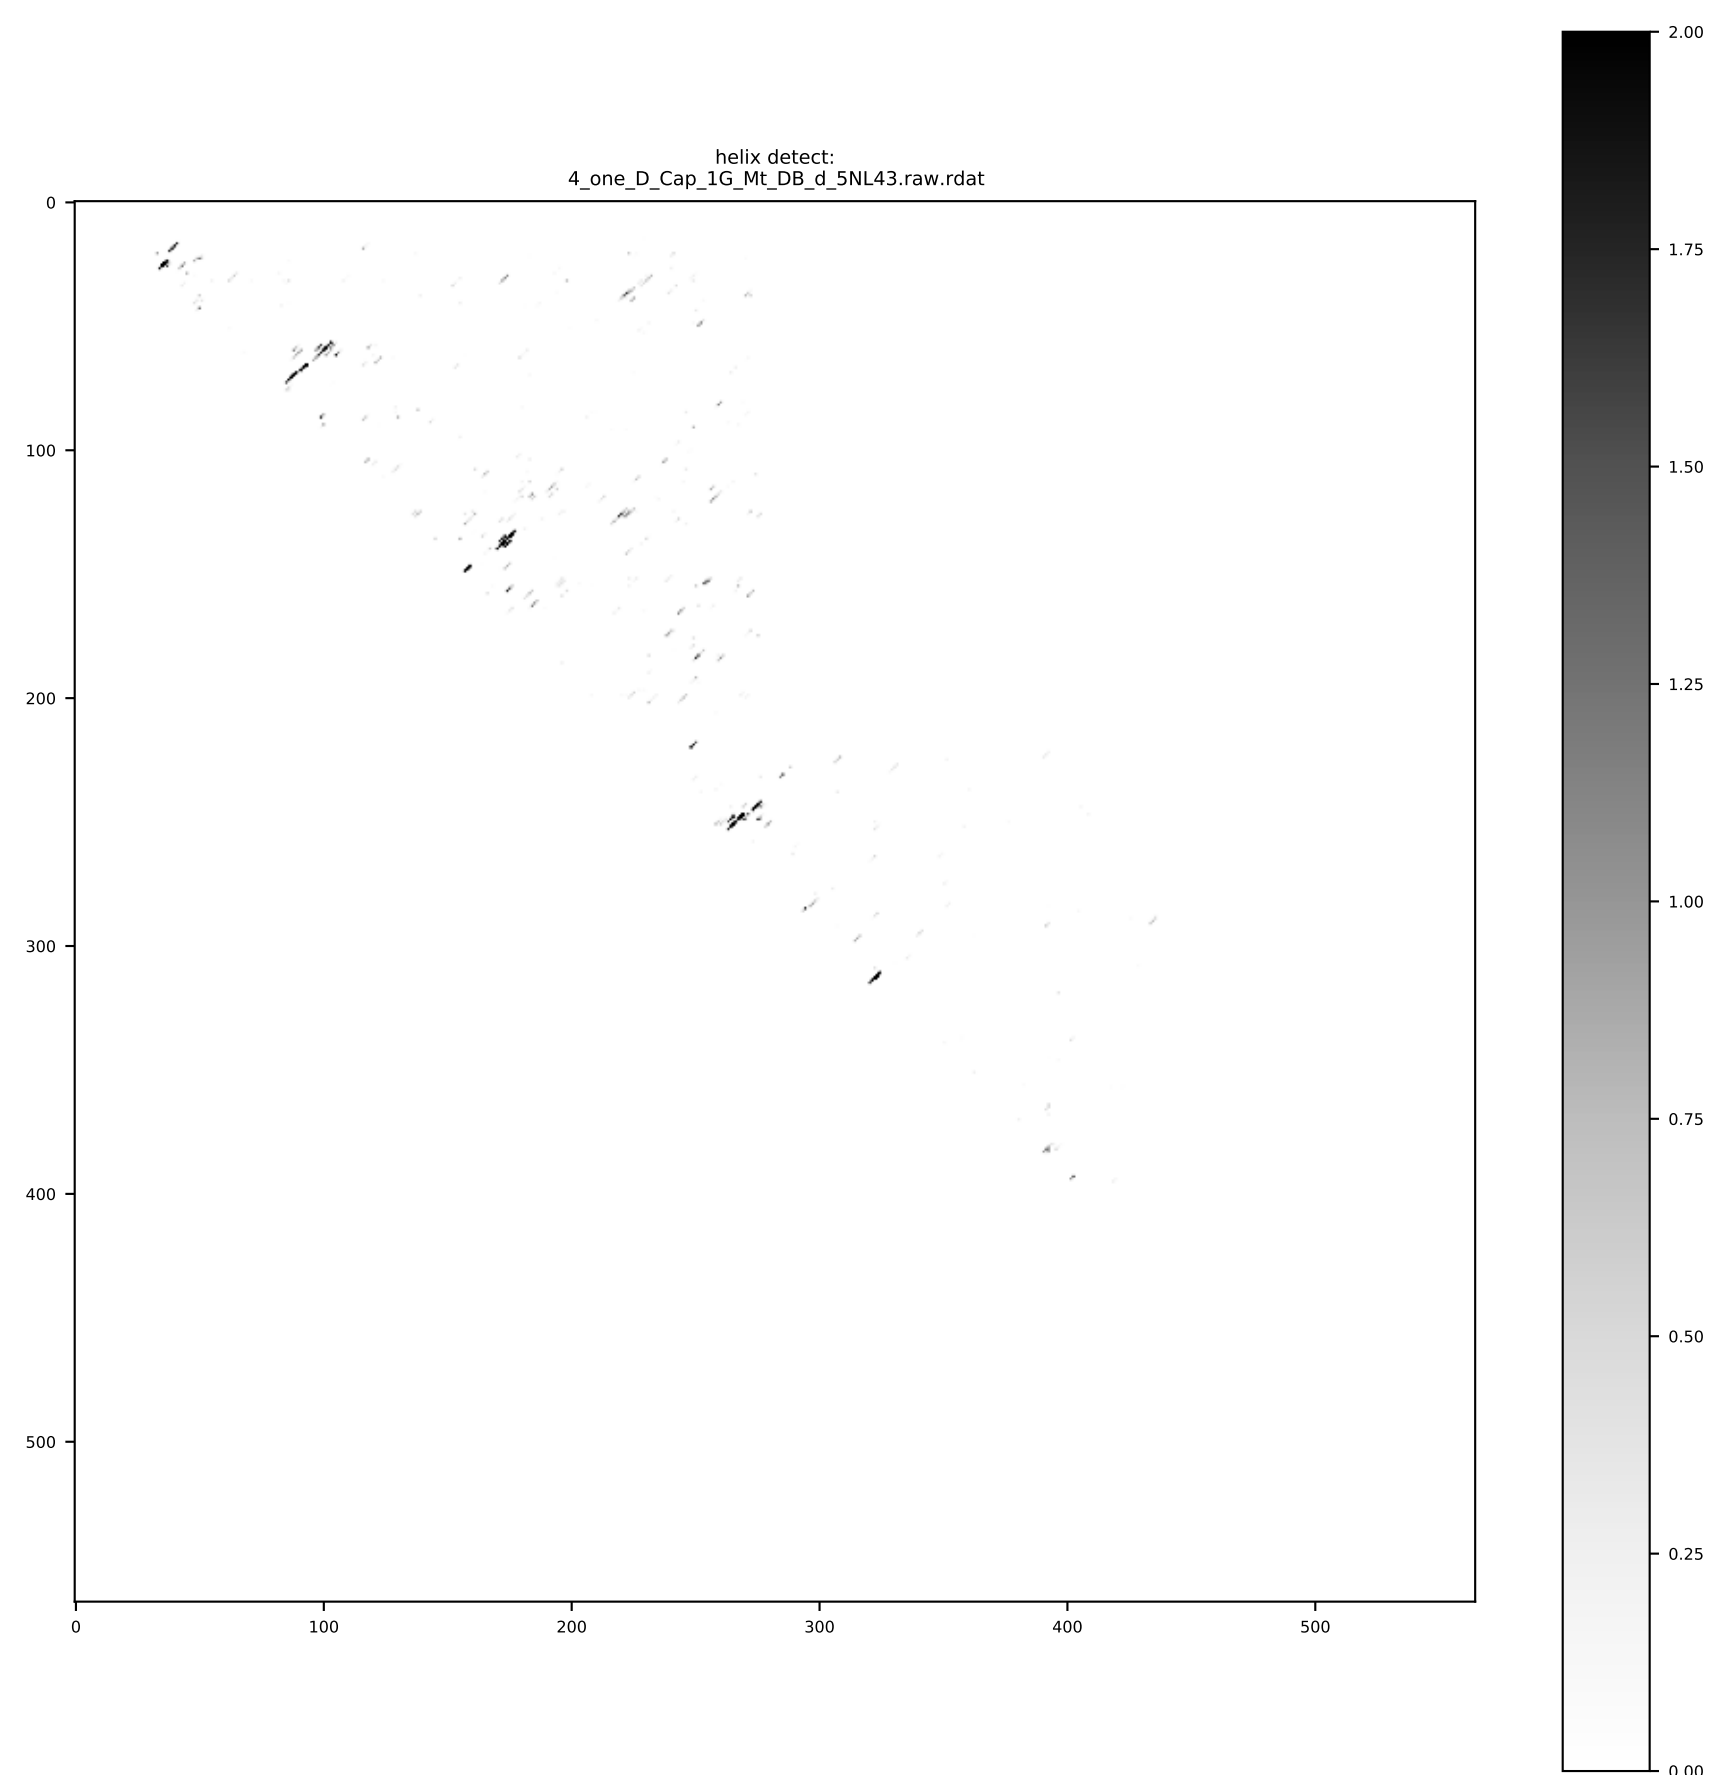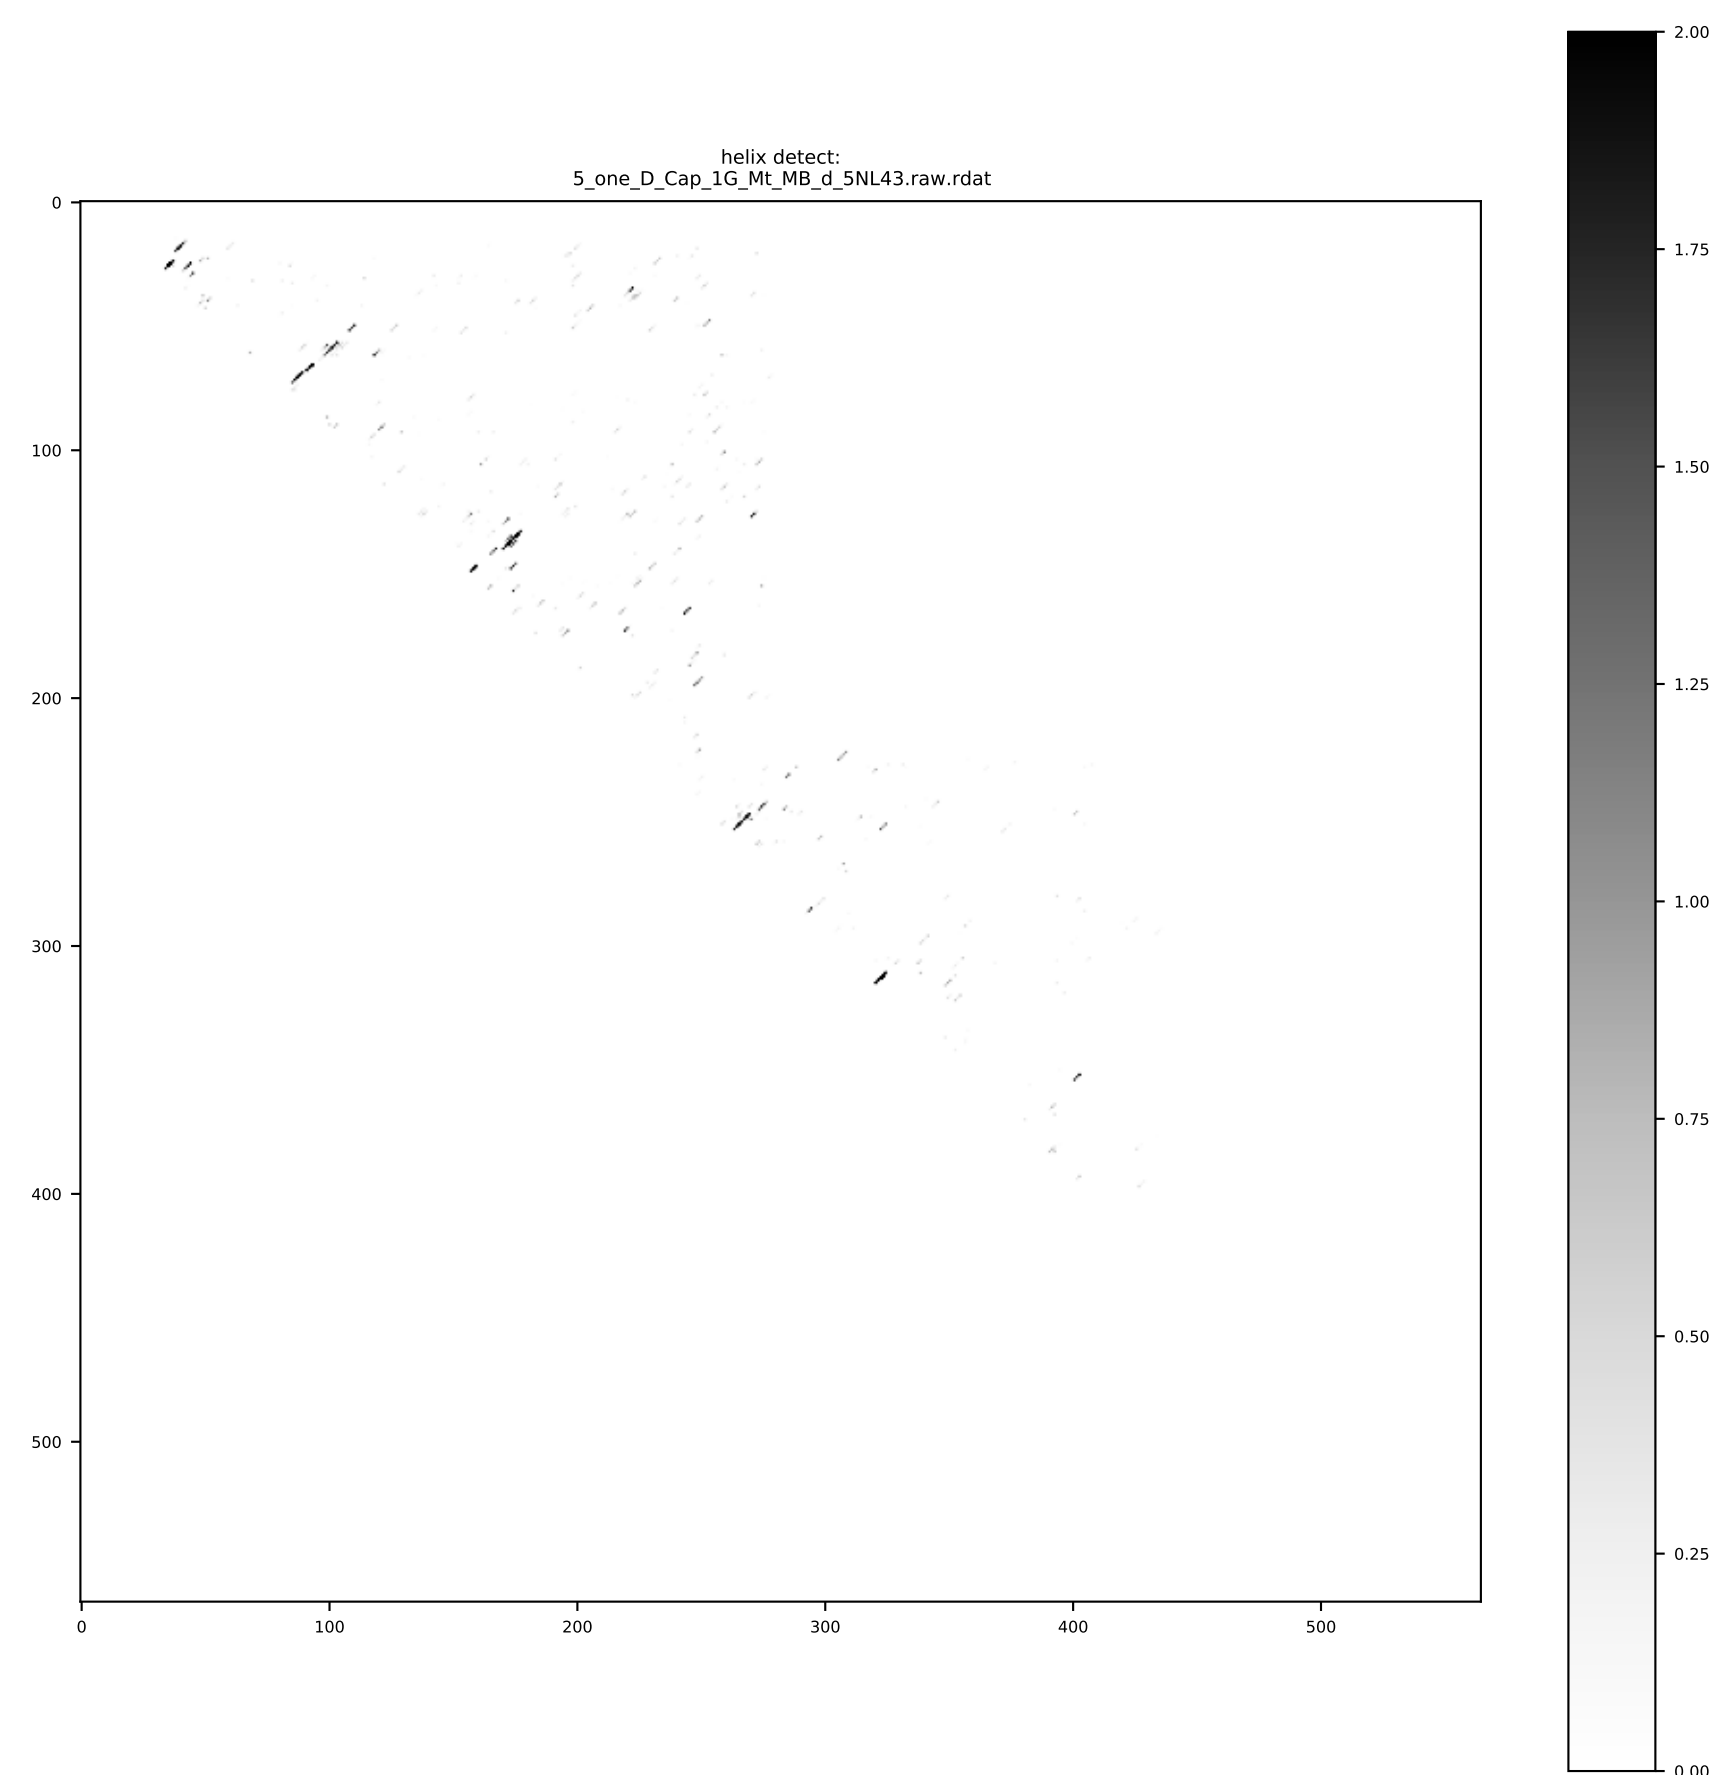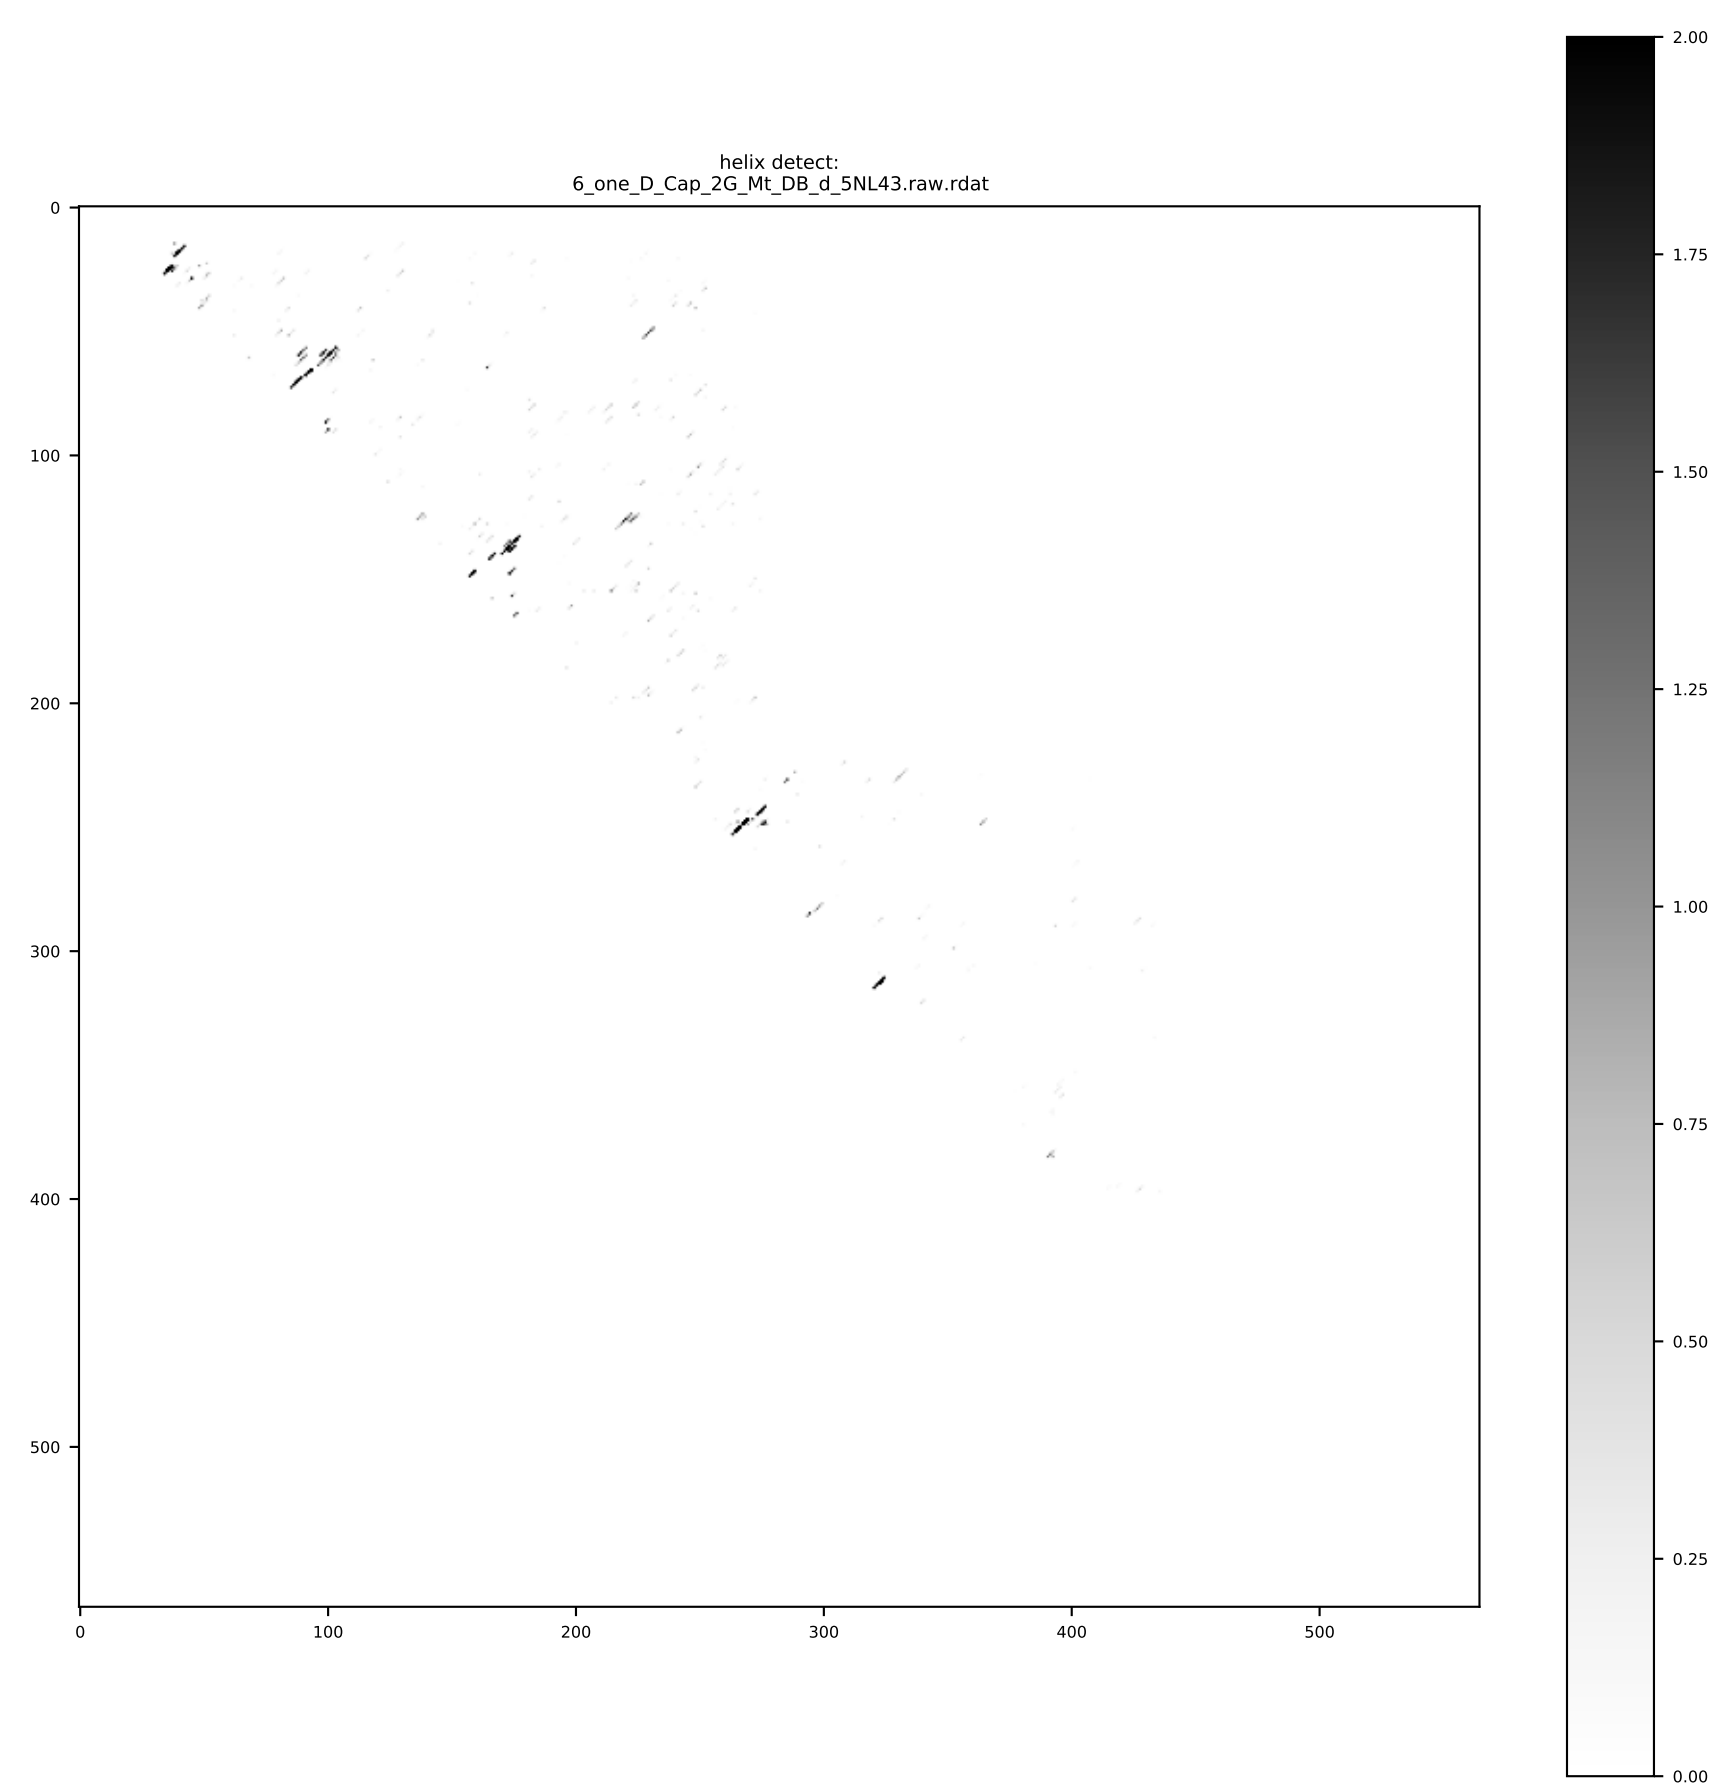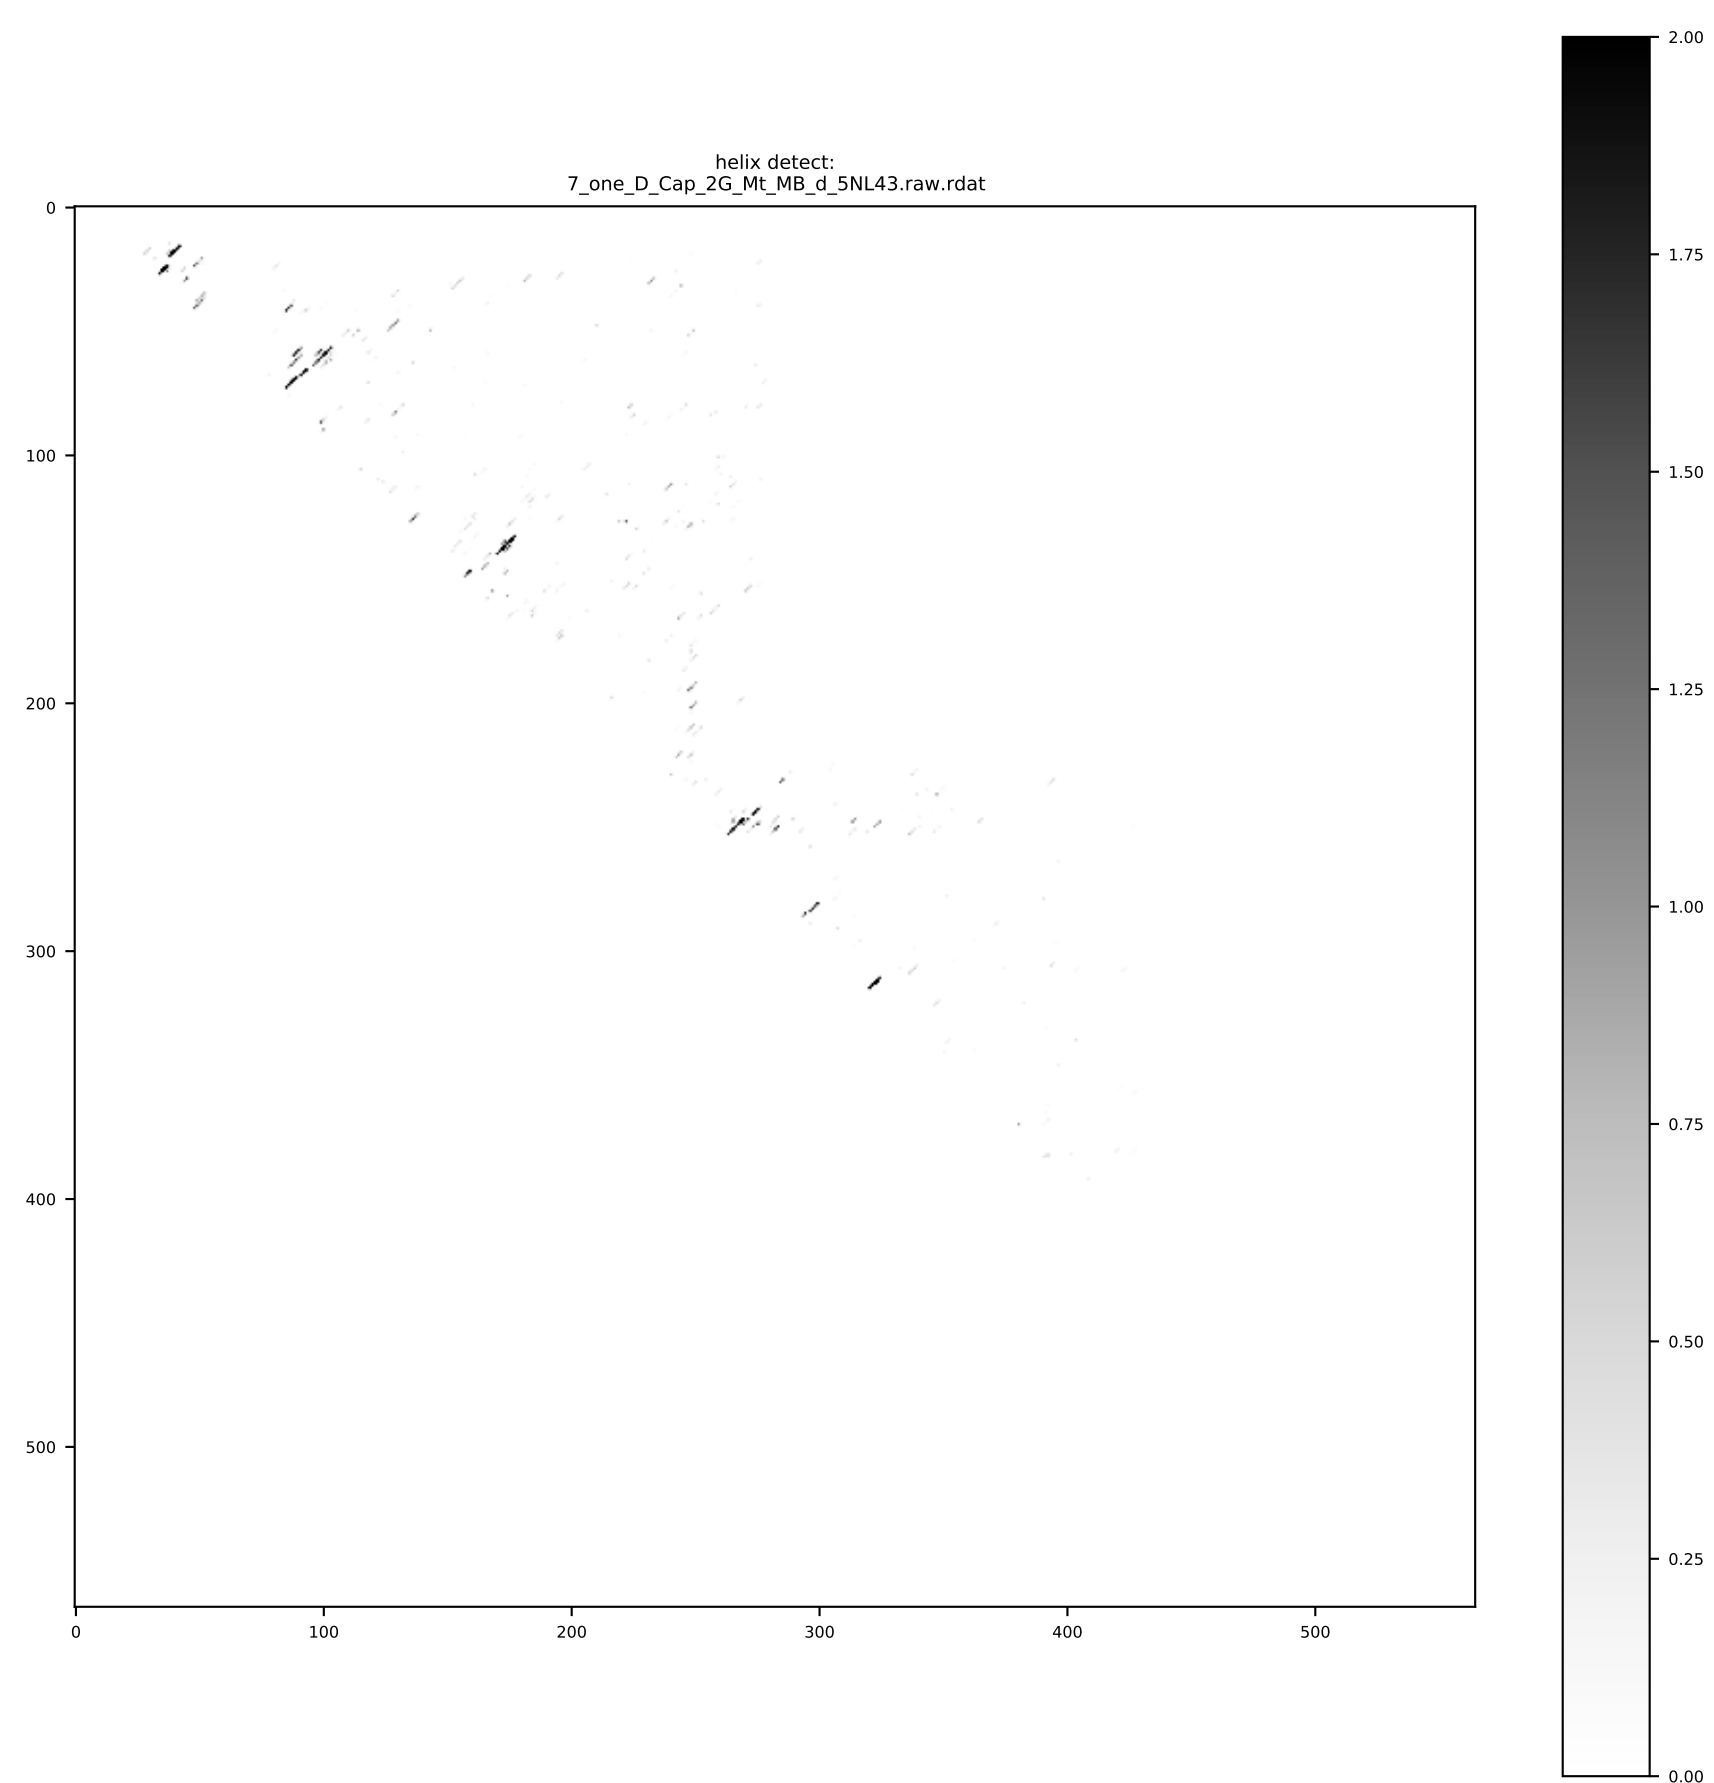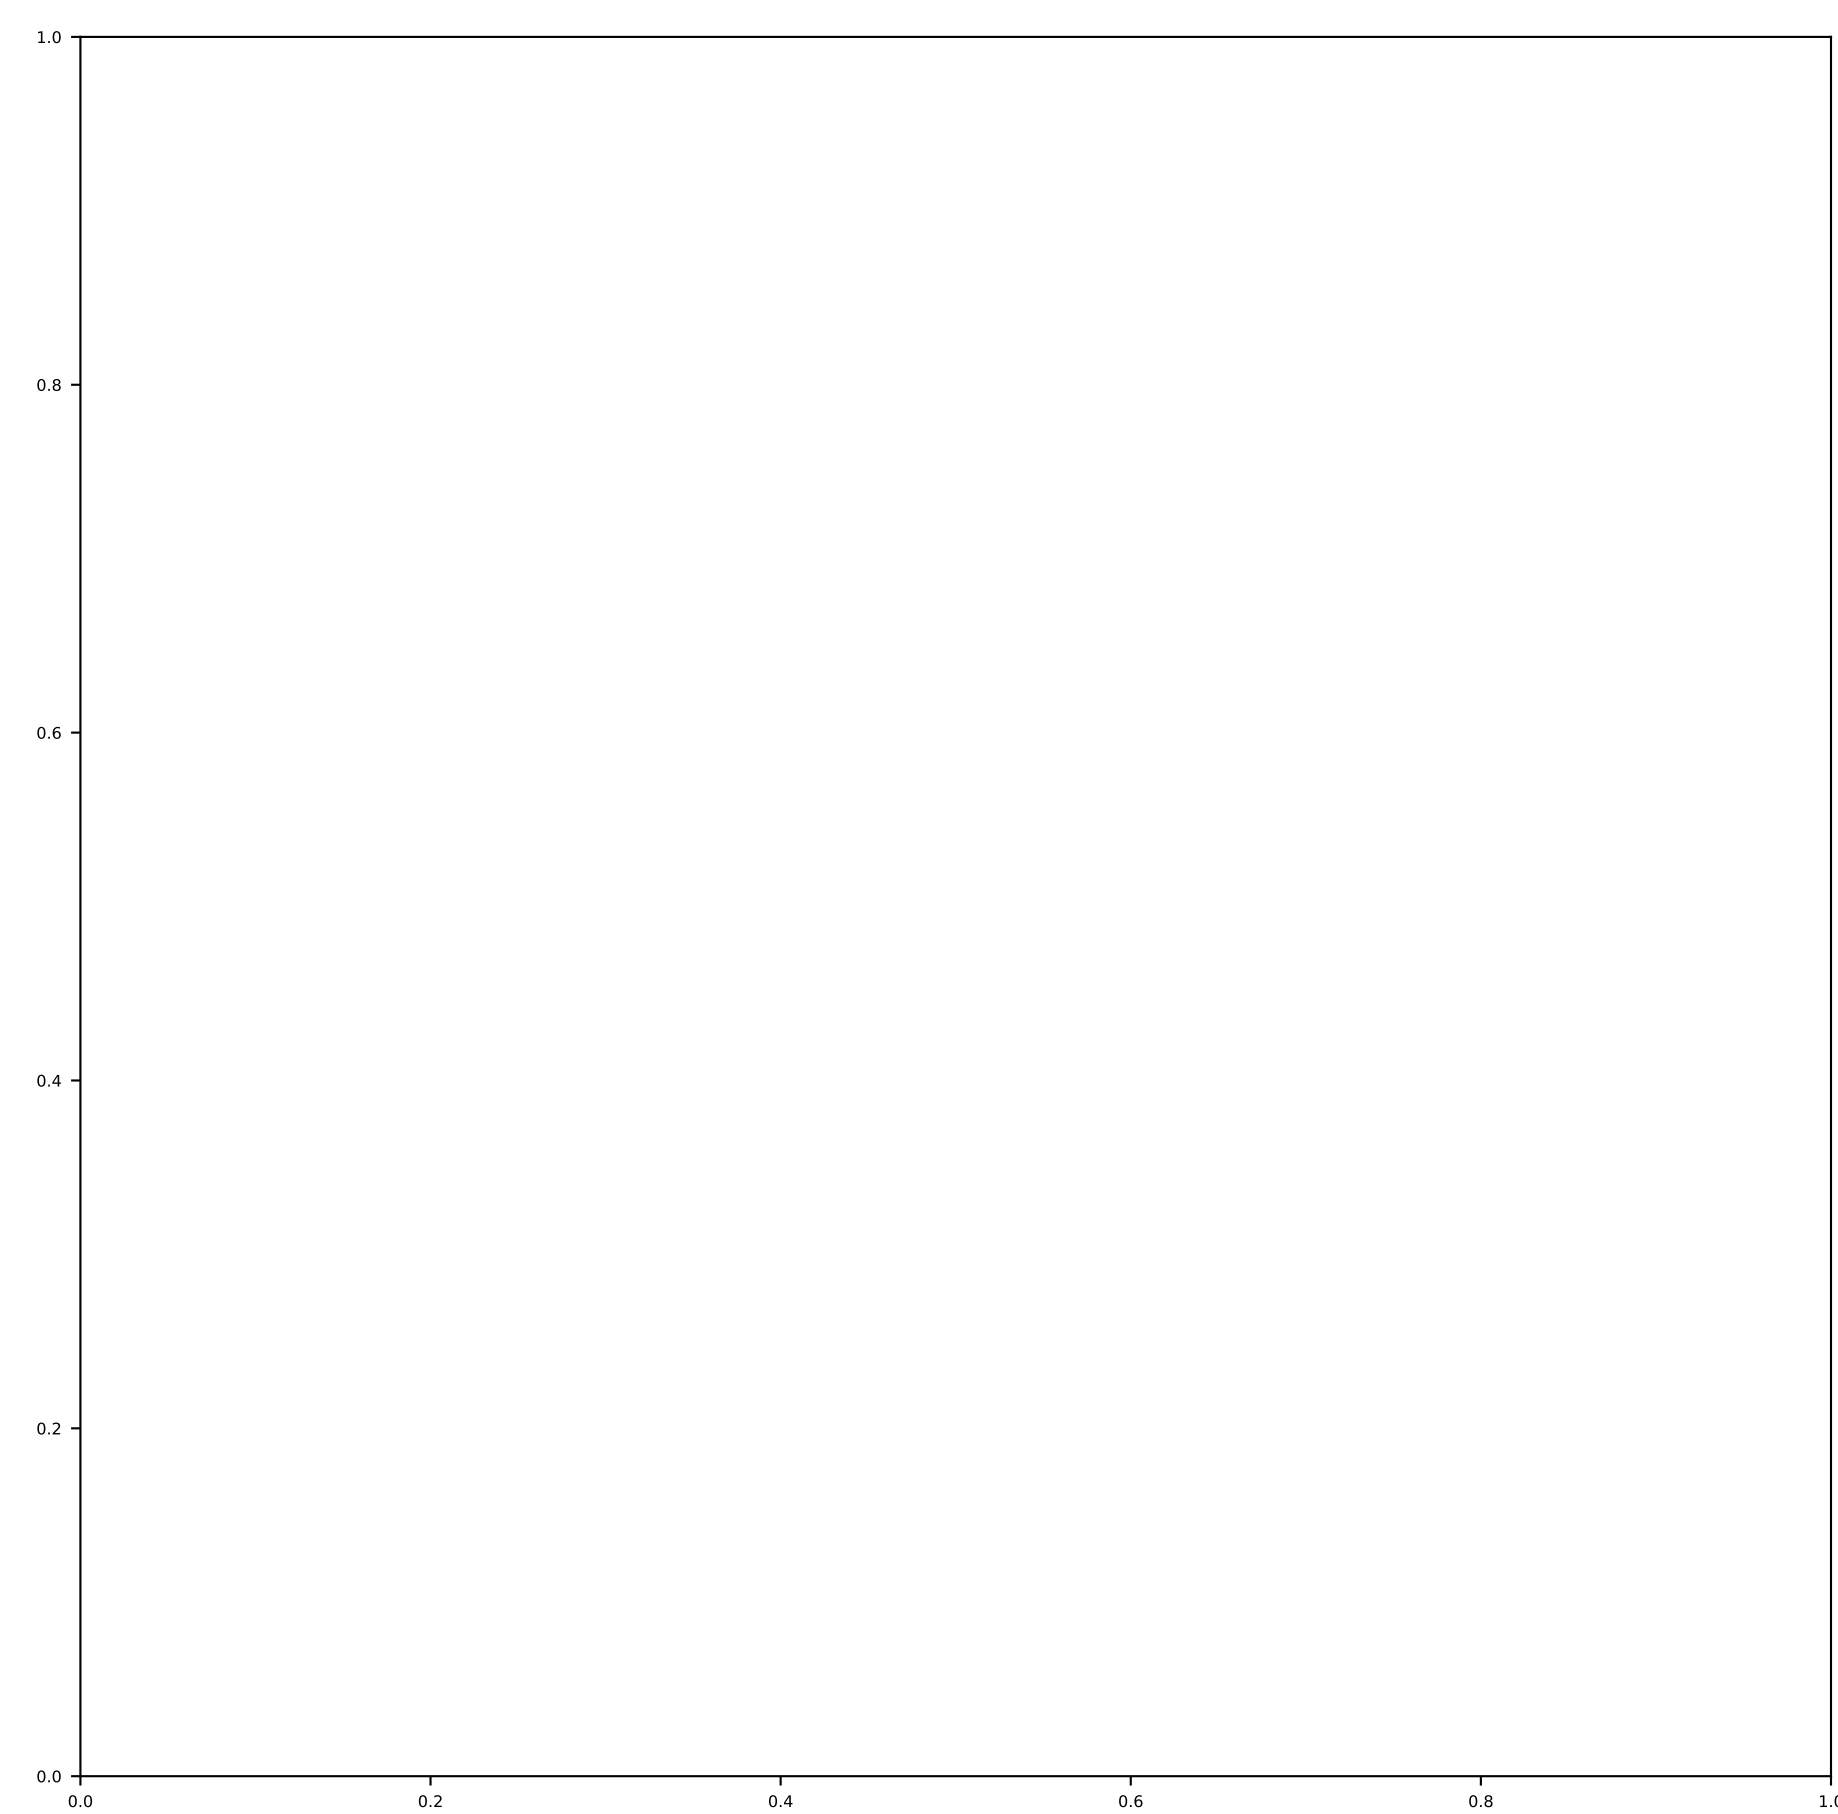

Supplement: Supplementary file 19 [file one_two_G_dimer_detected_helix.pdf › 2d-structure-inference/detected_helix/one_two_G_dimer_detected_helix.pdf]

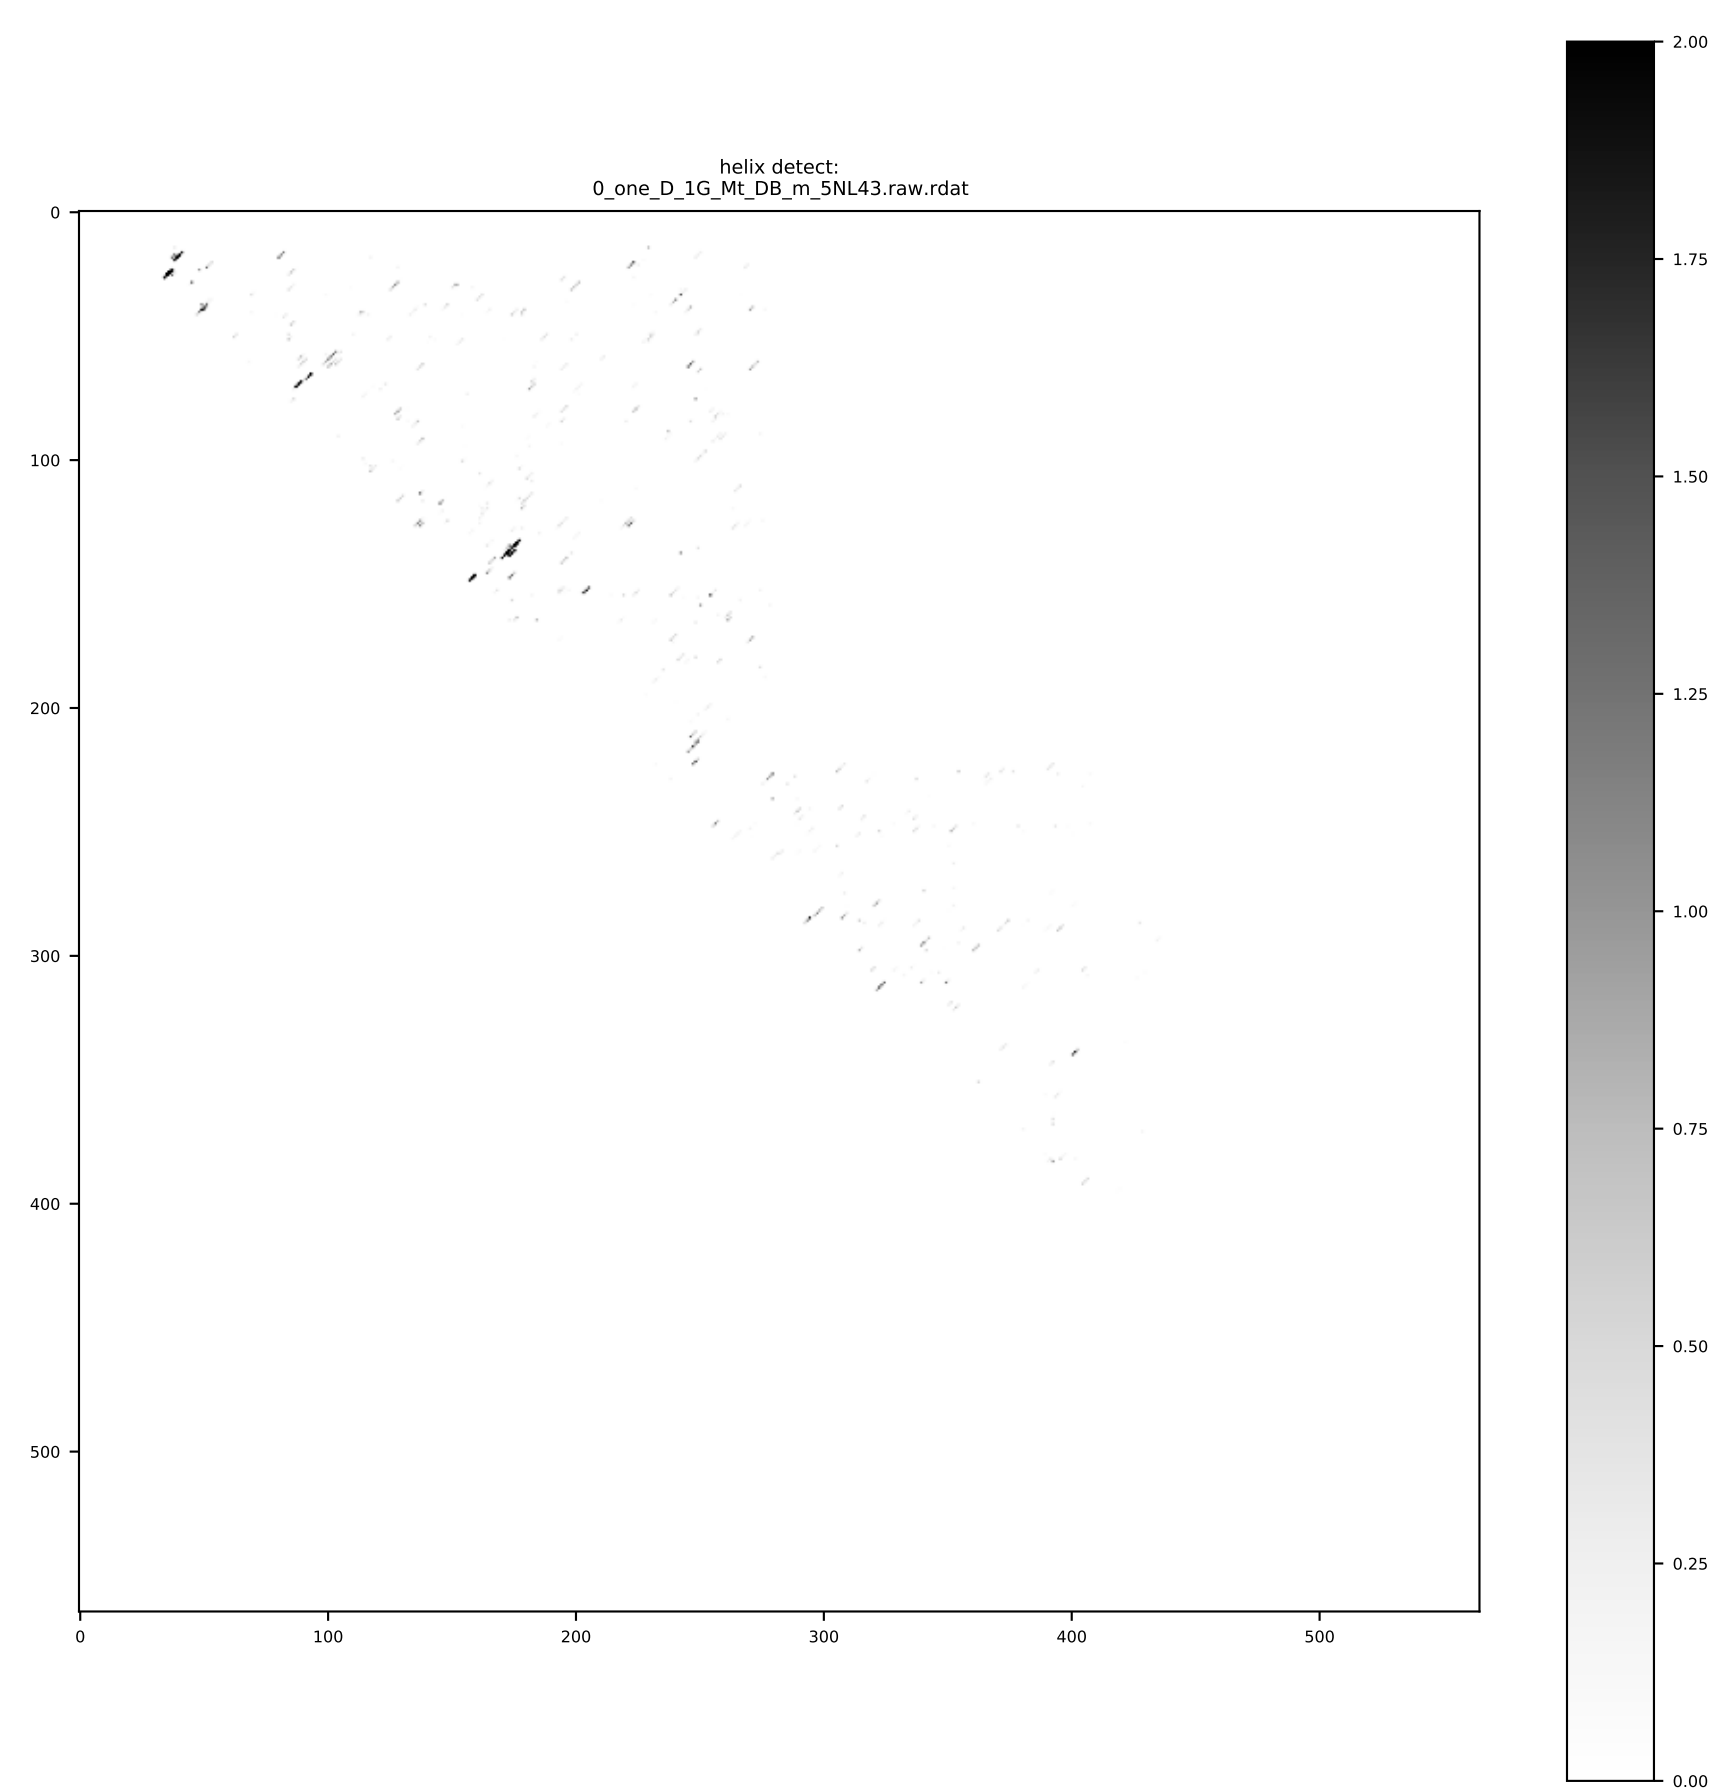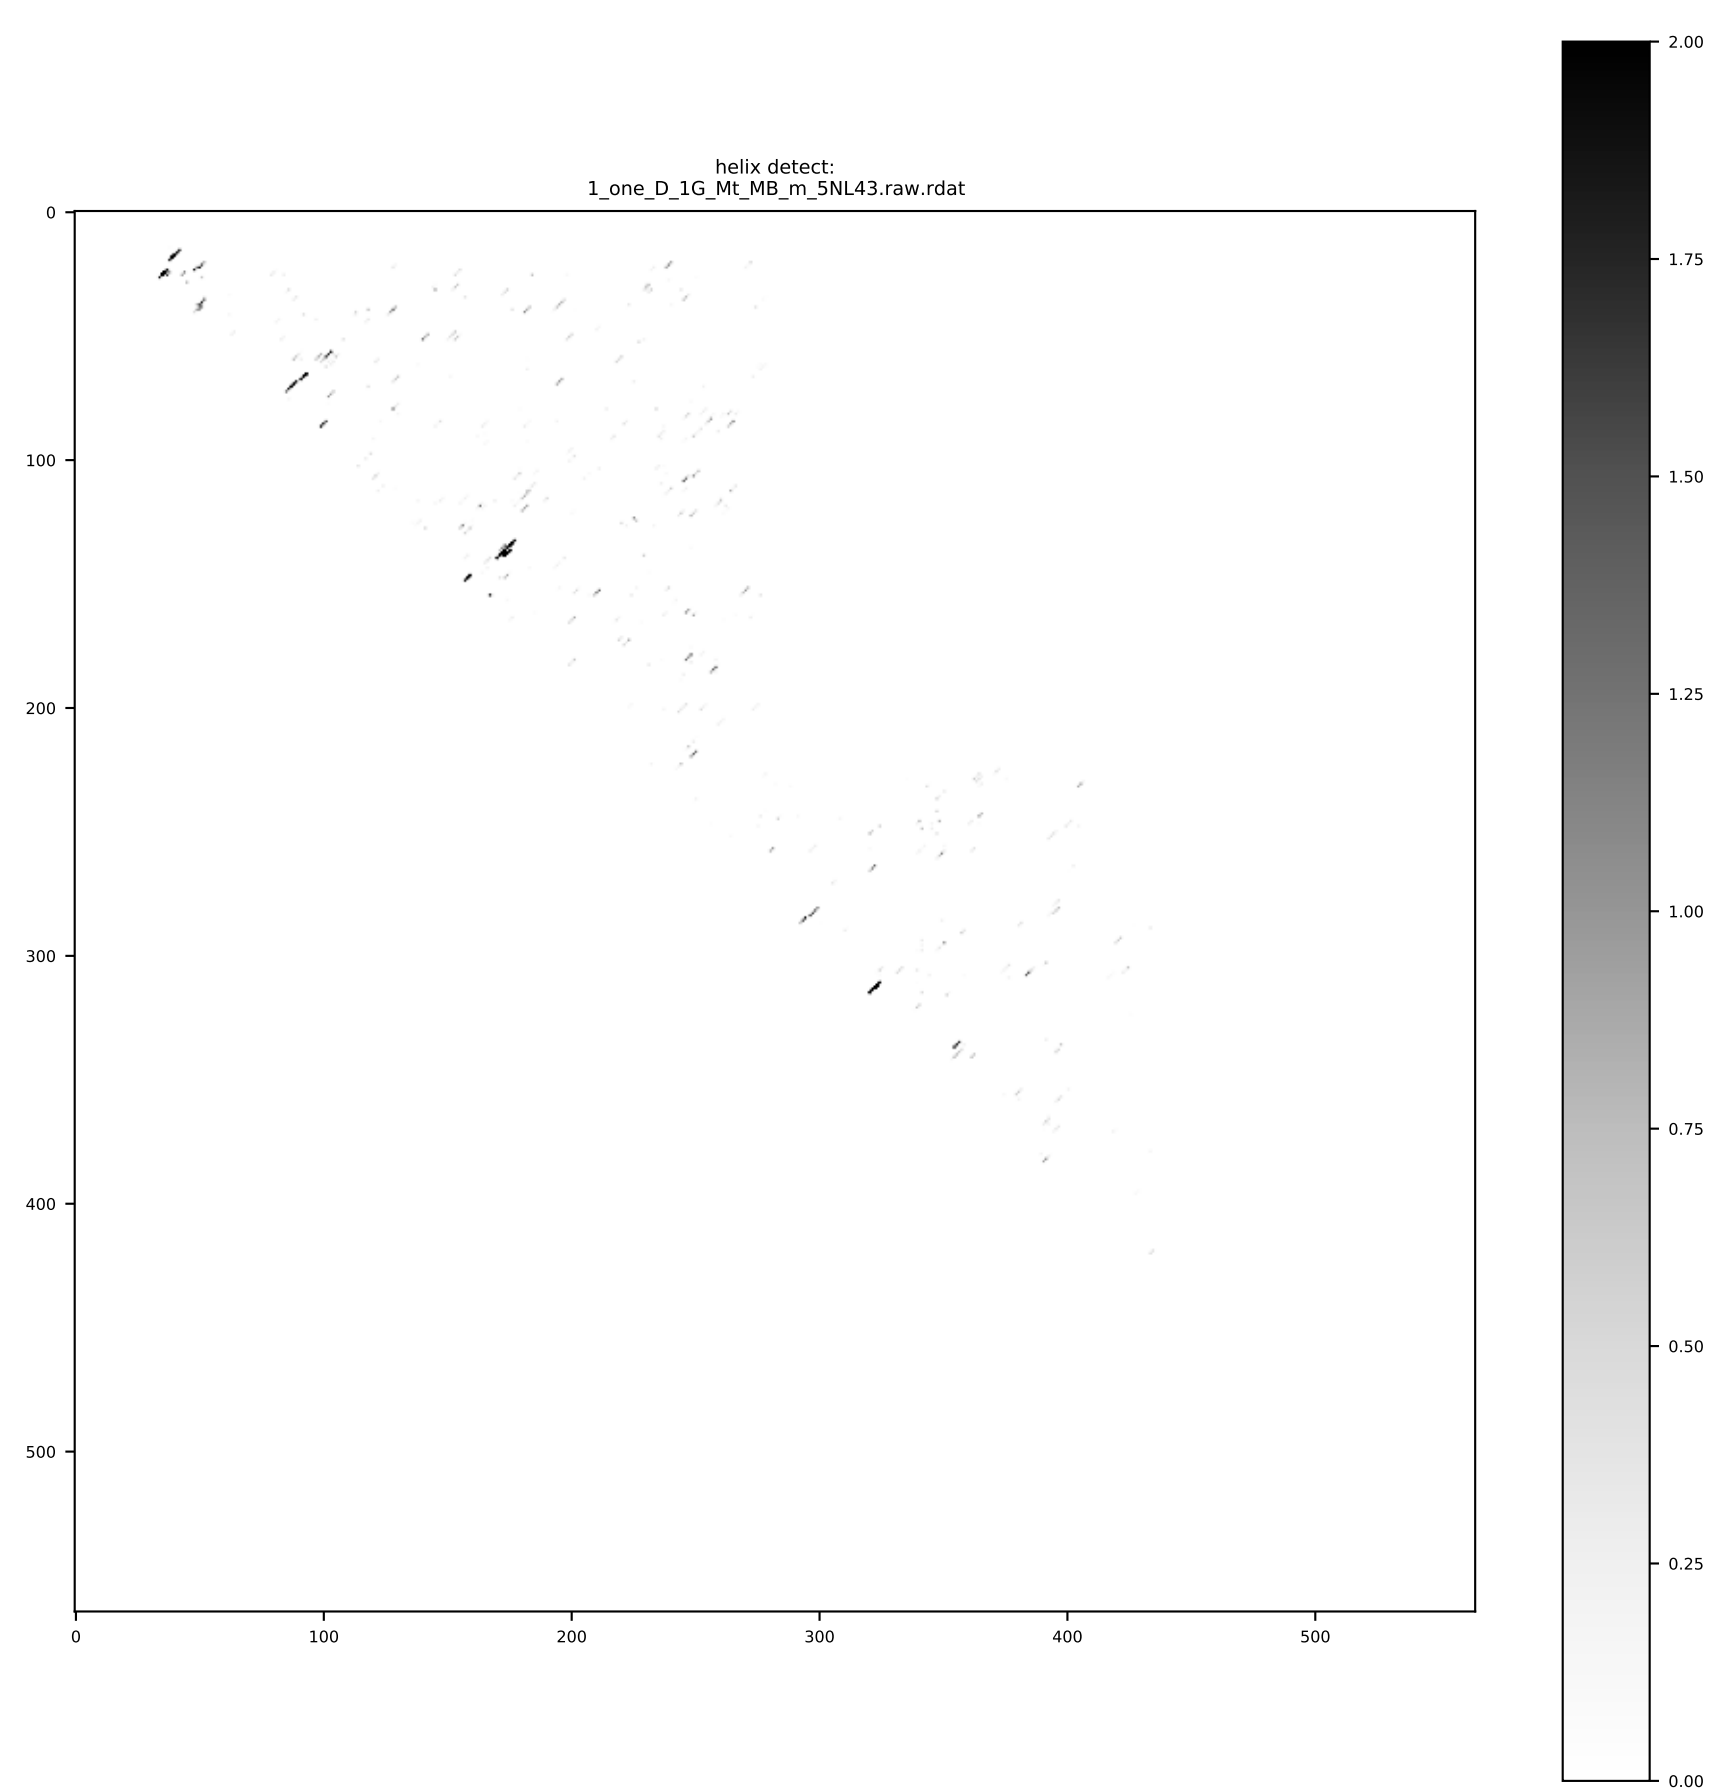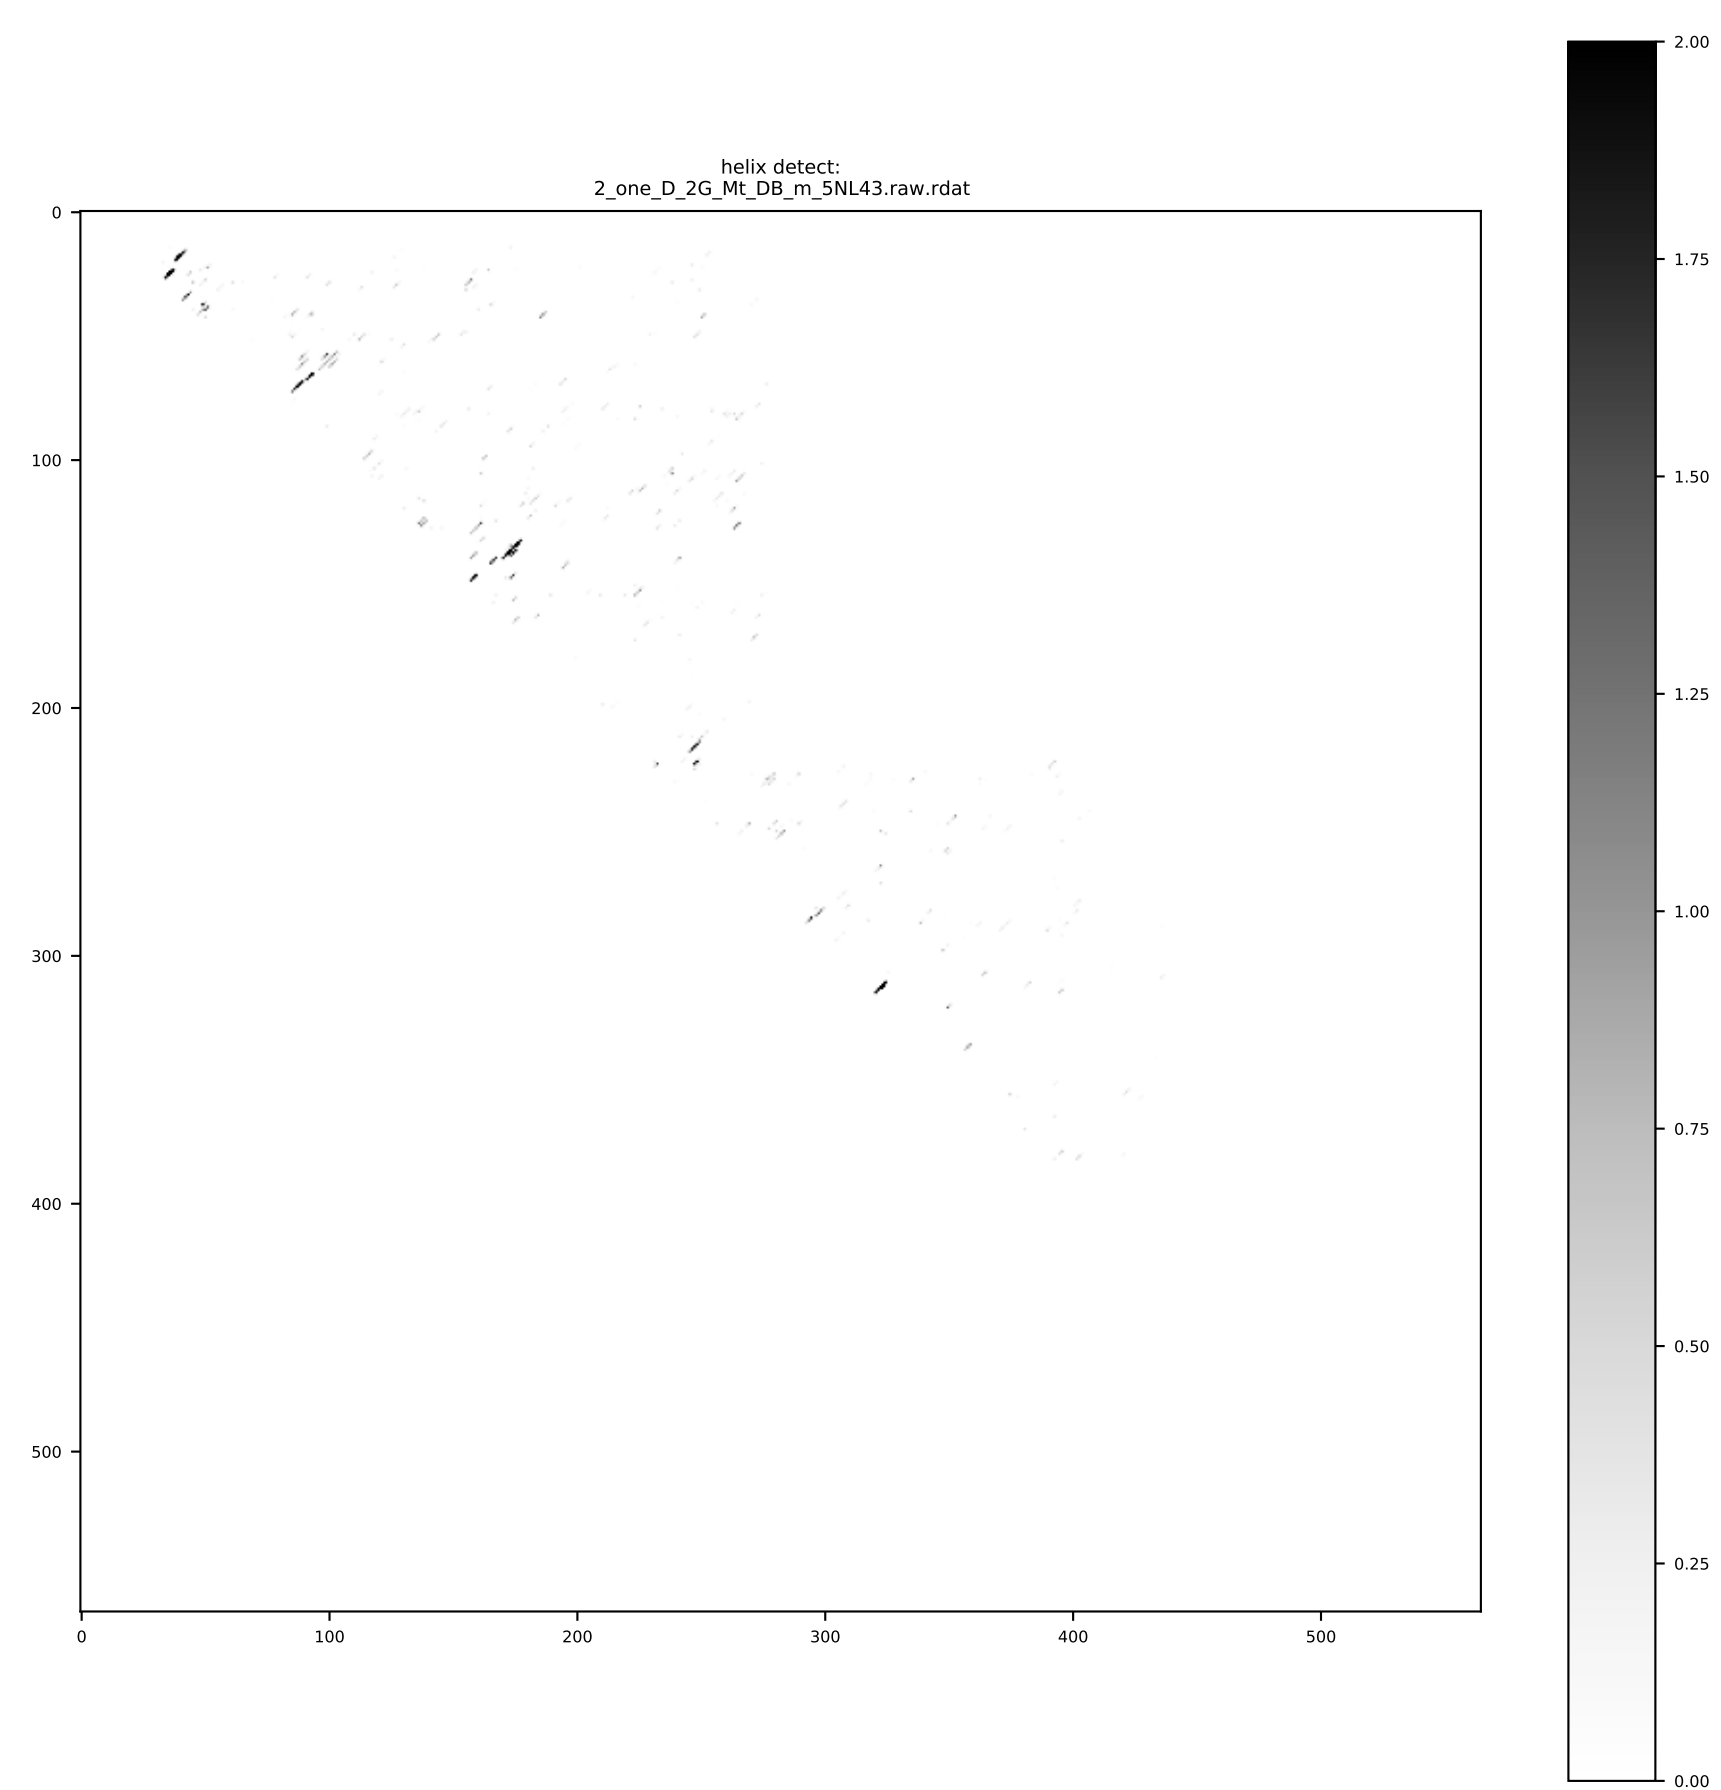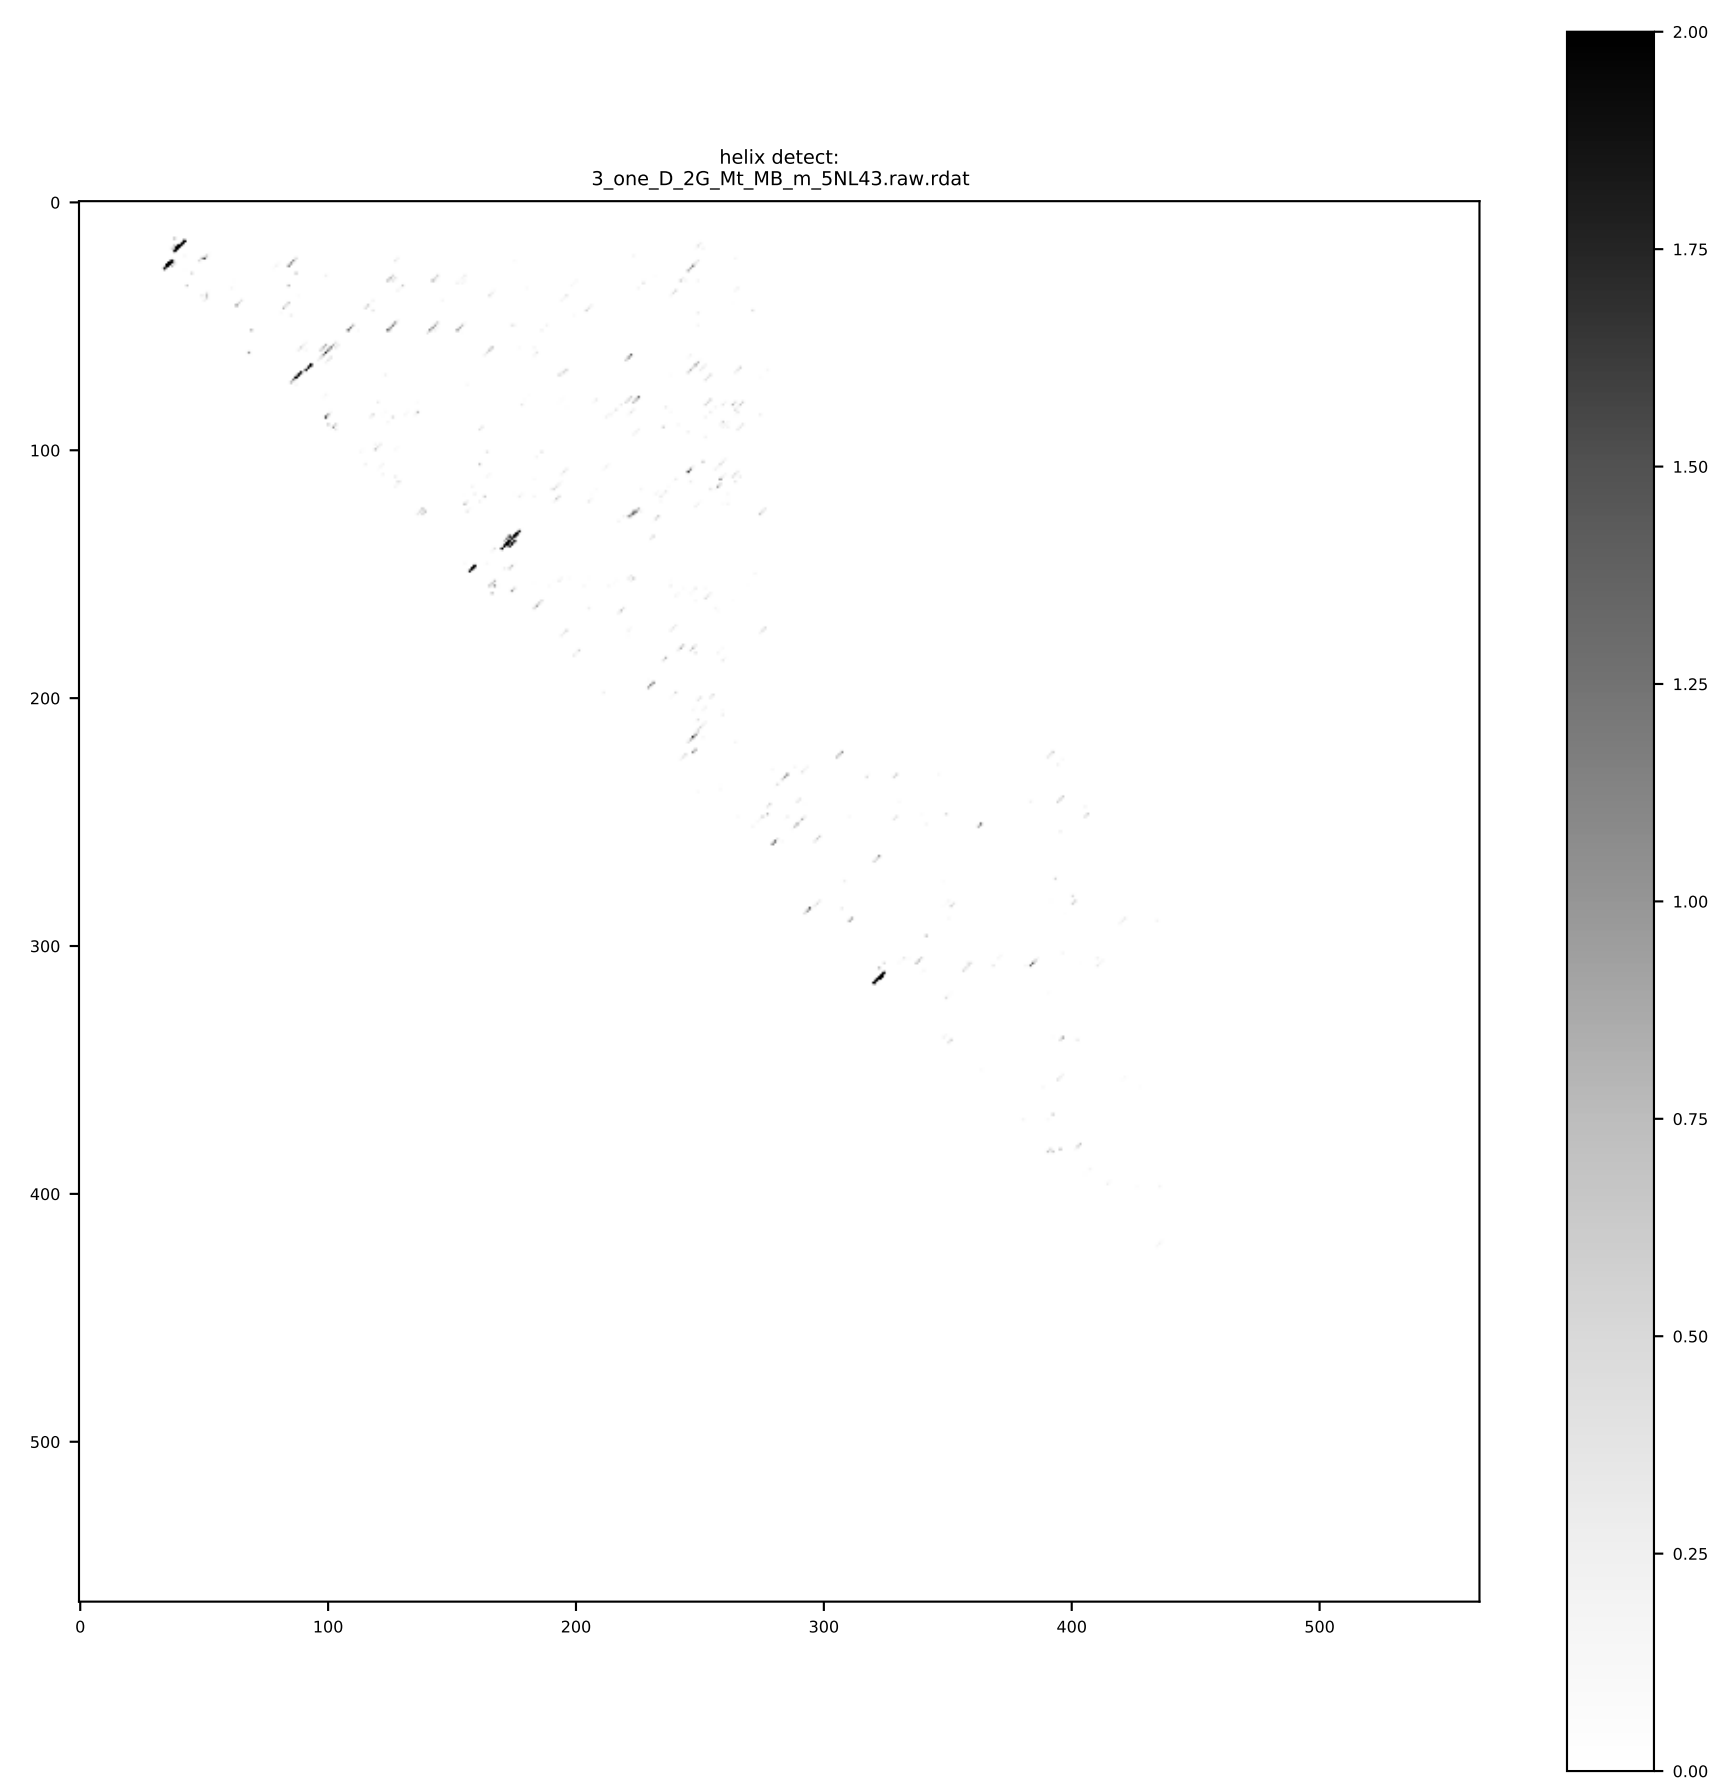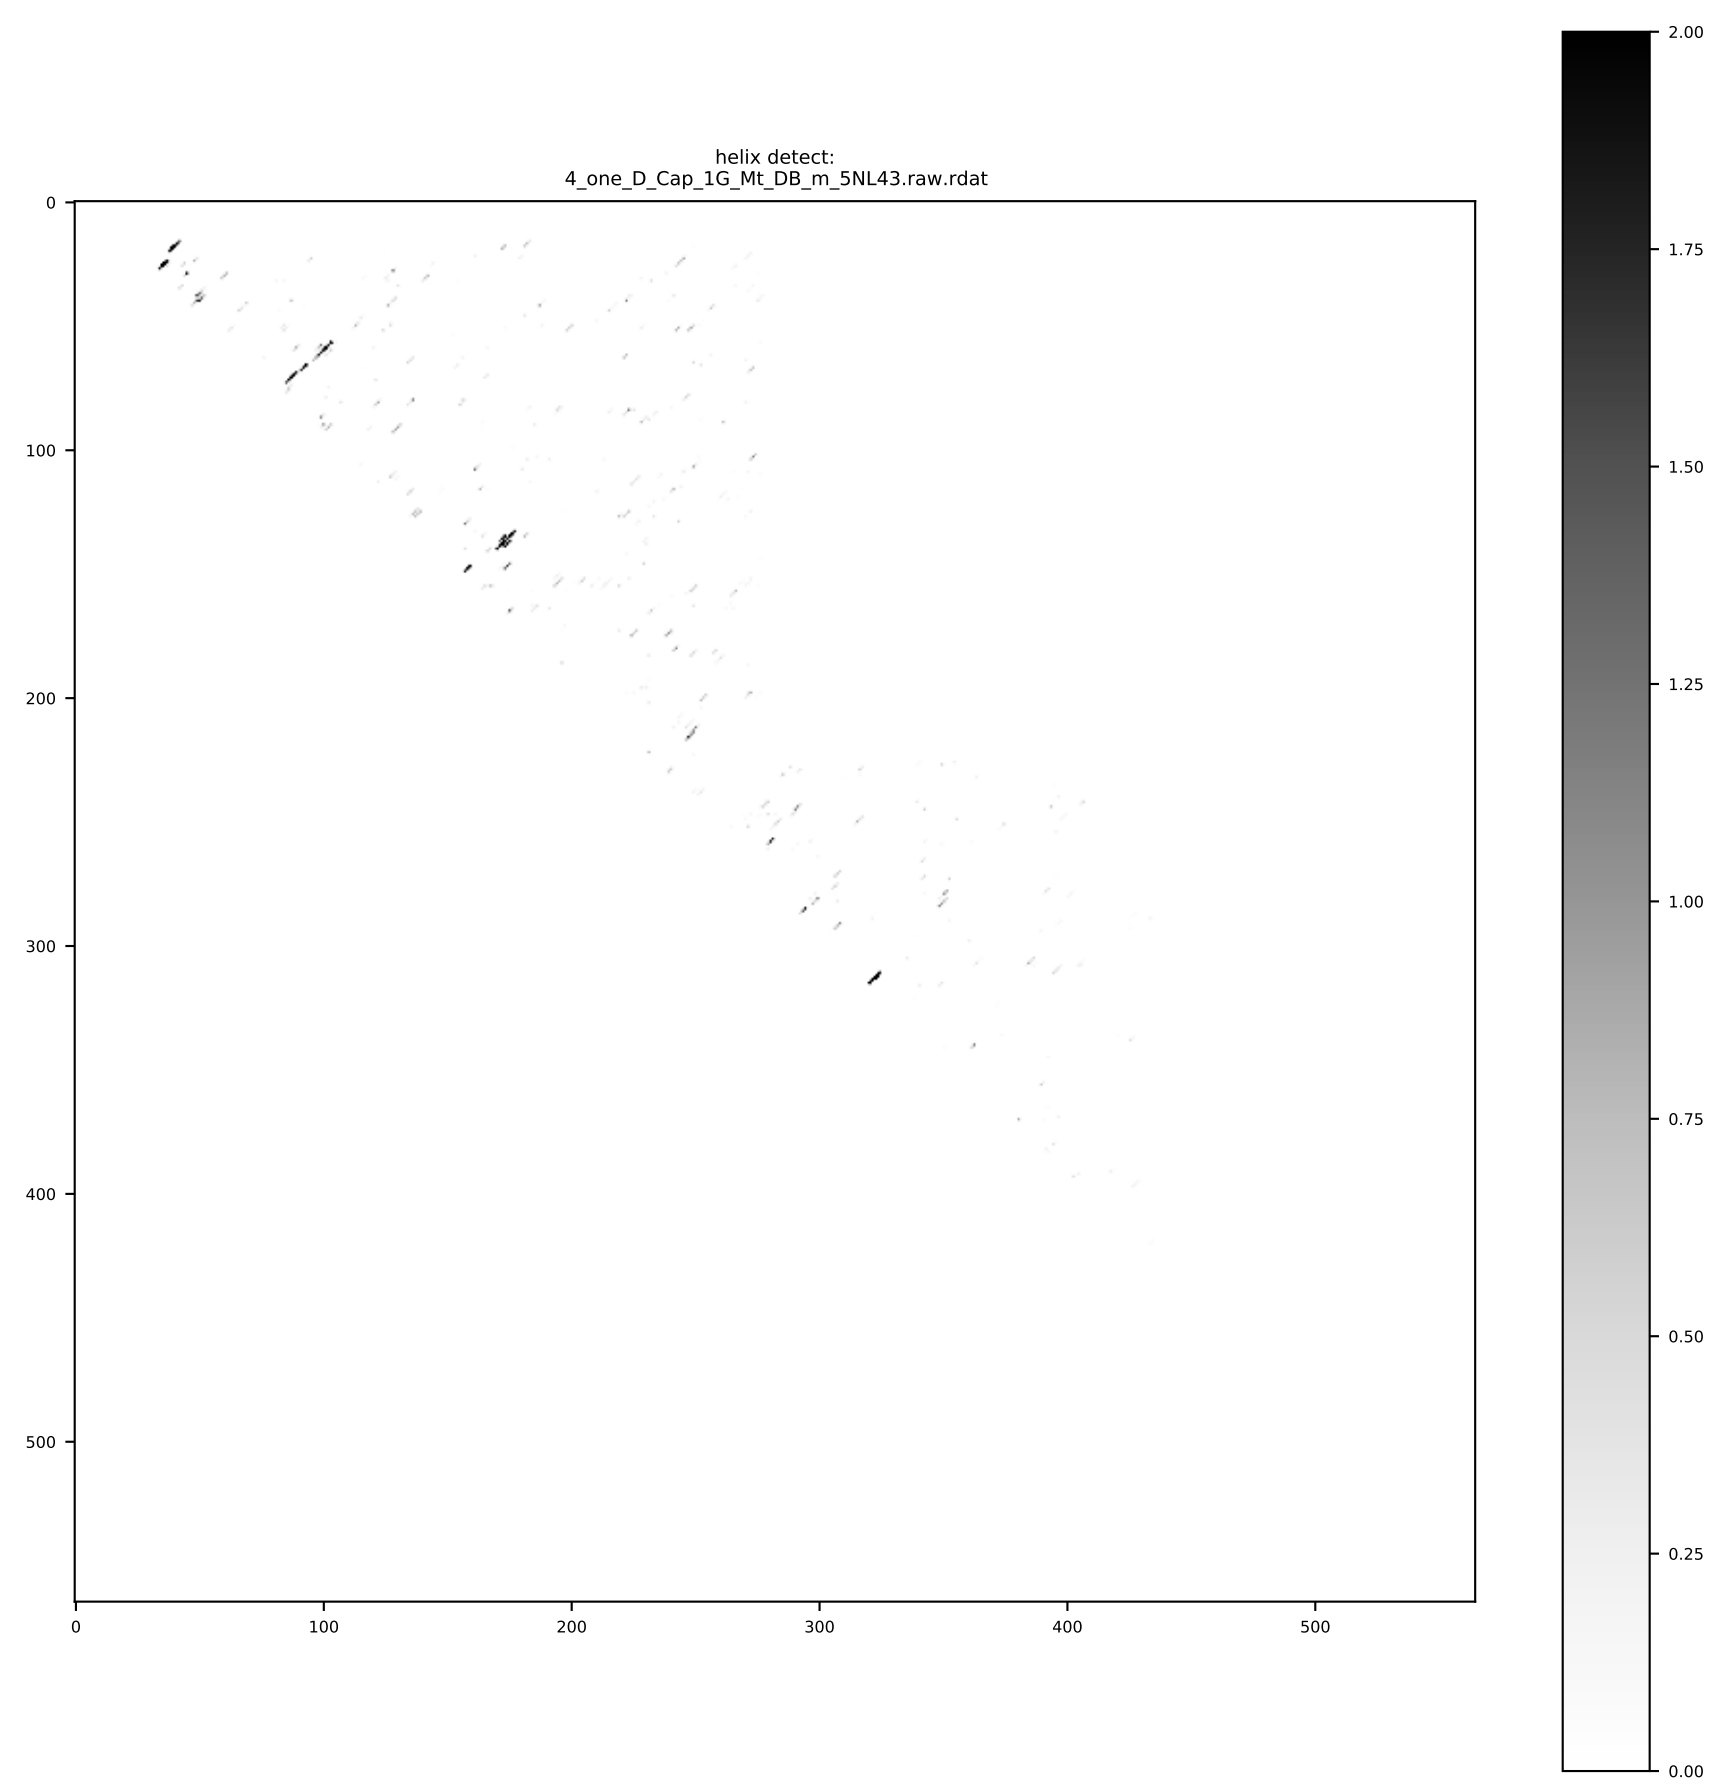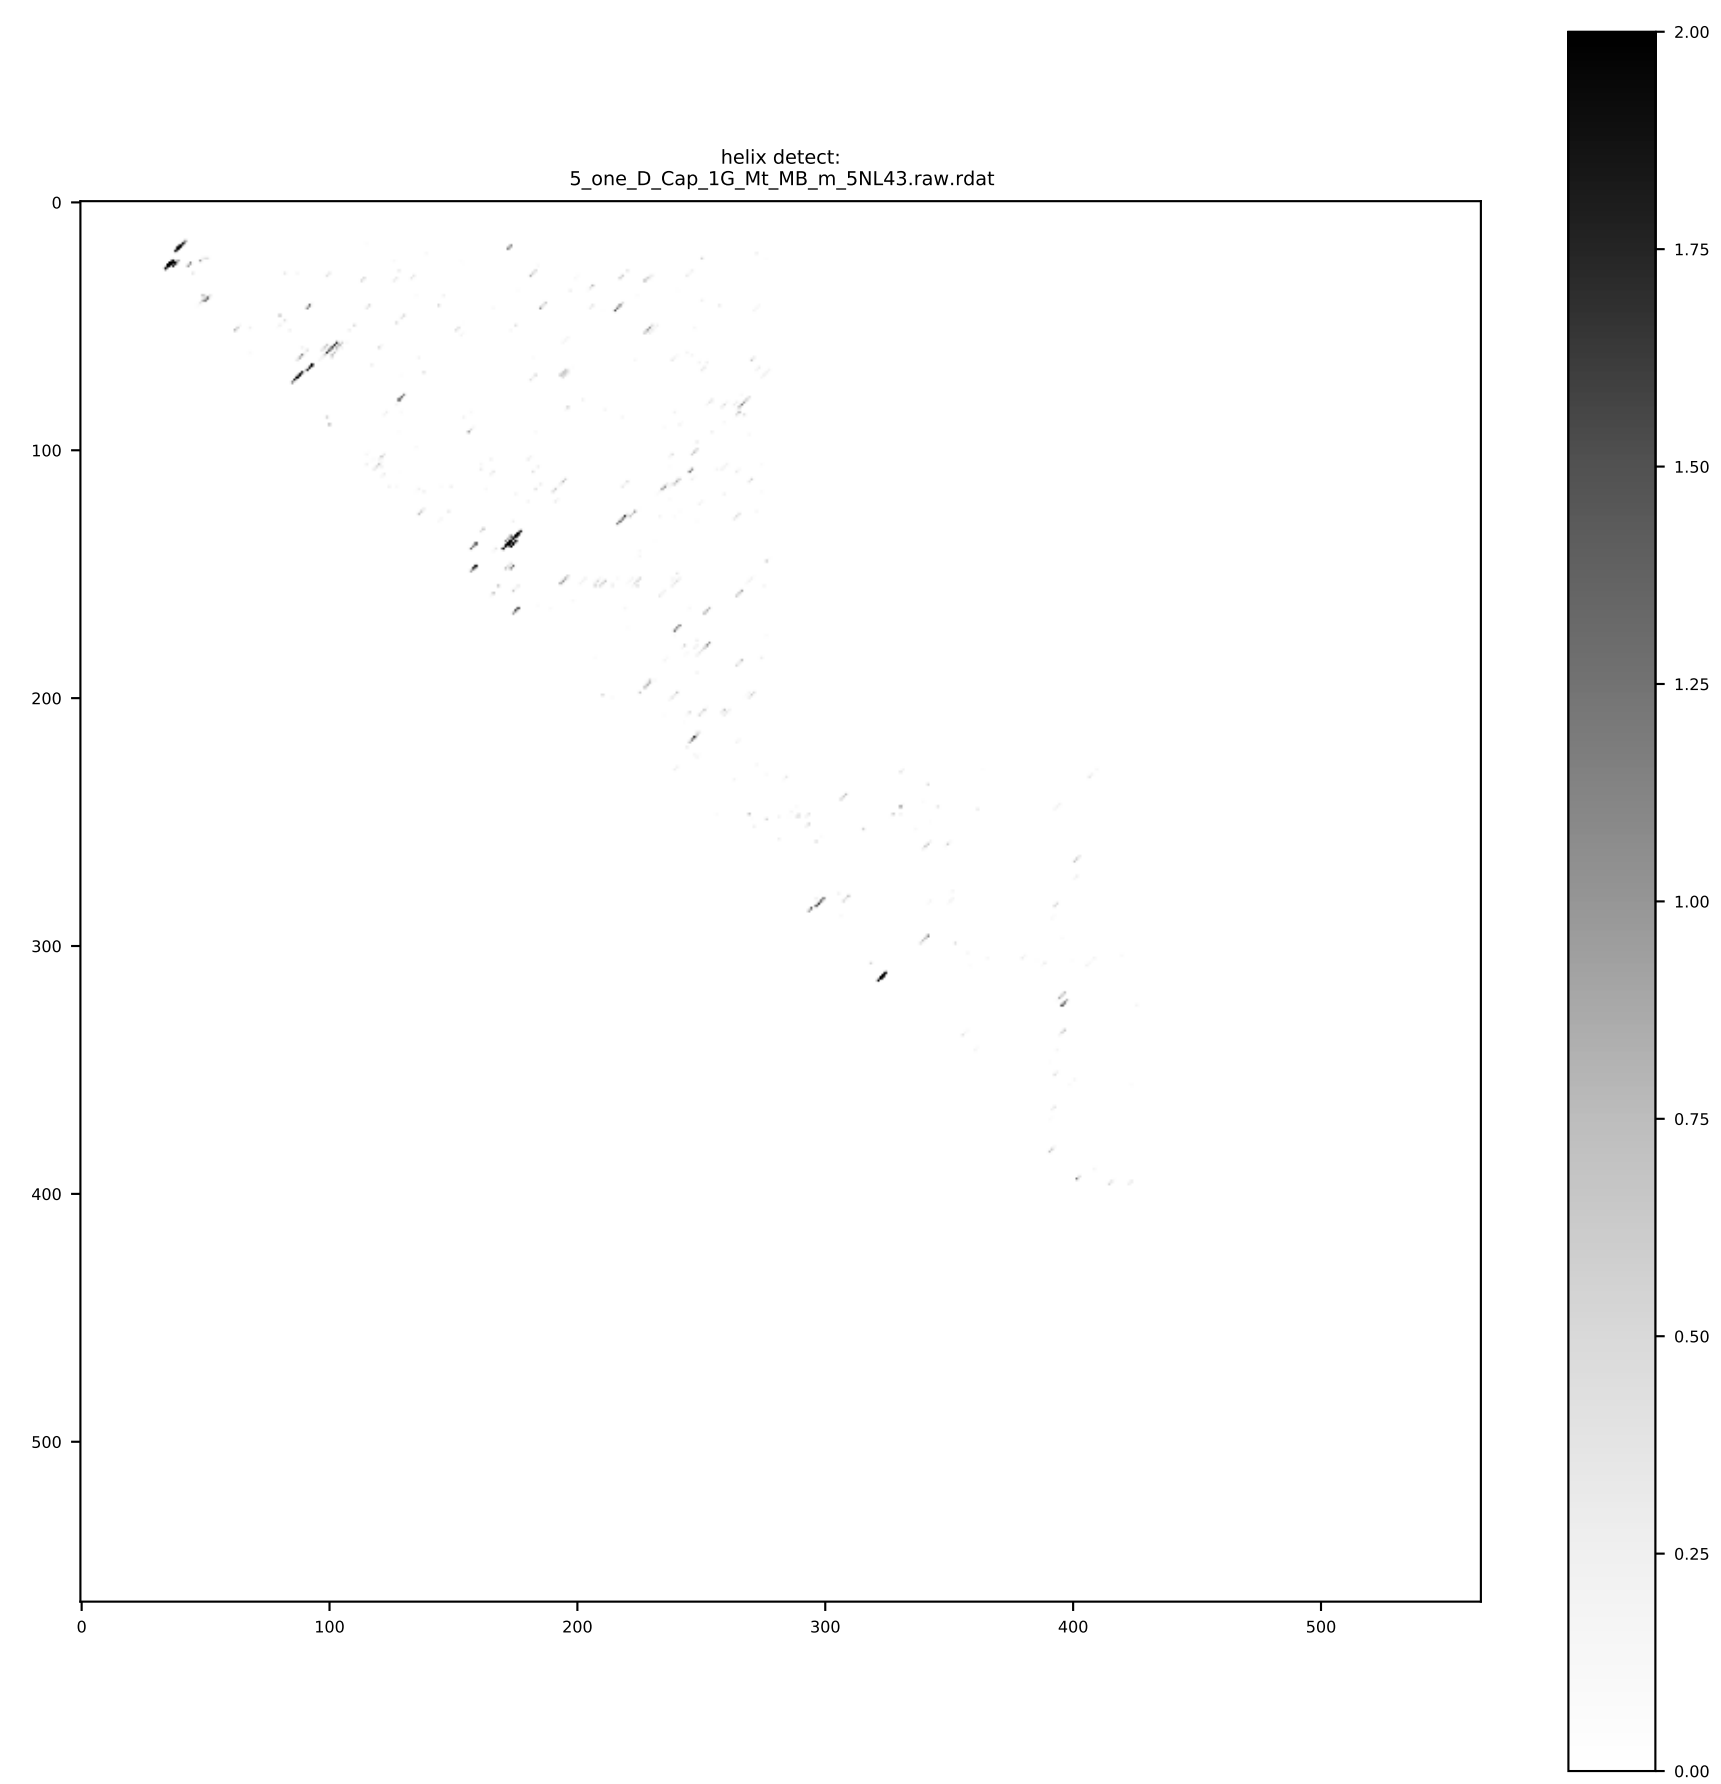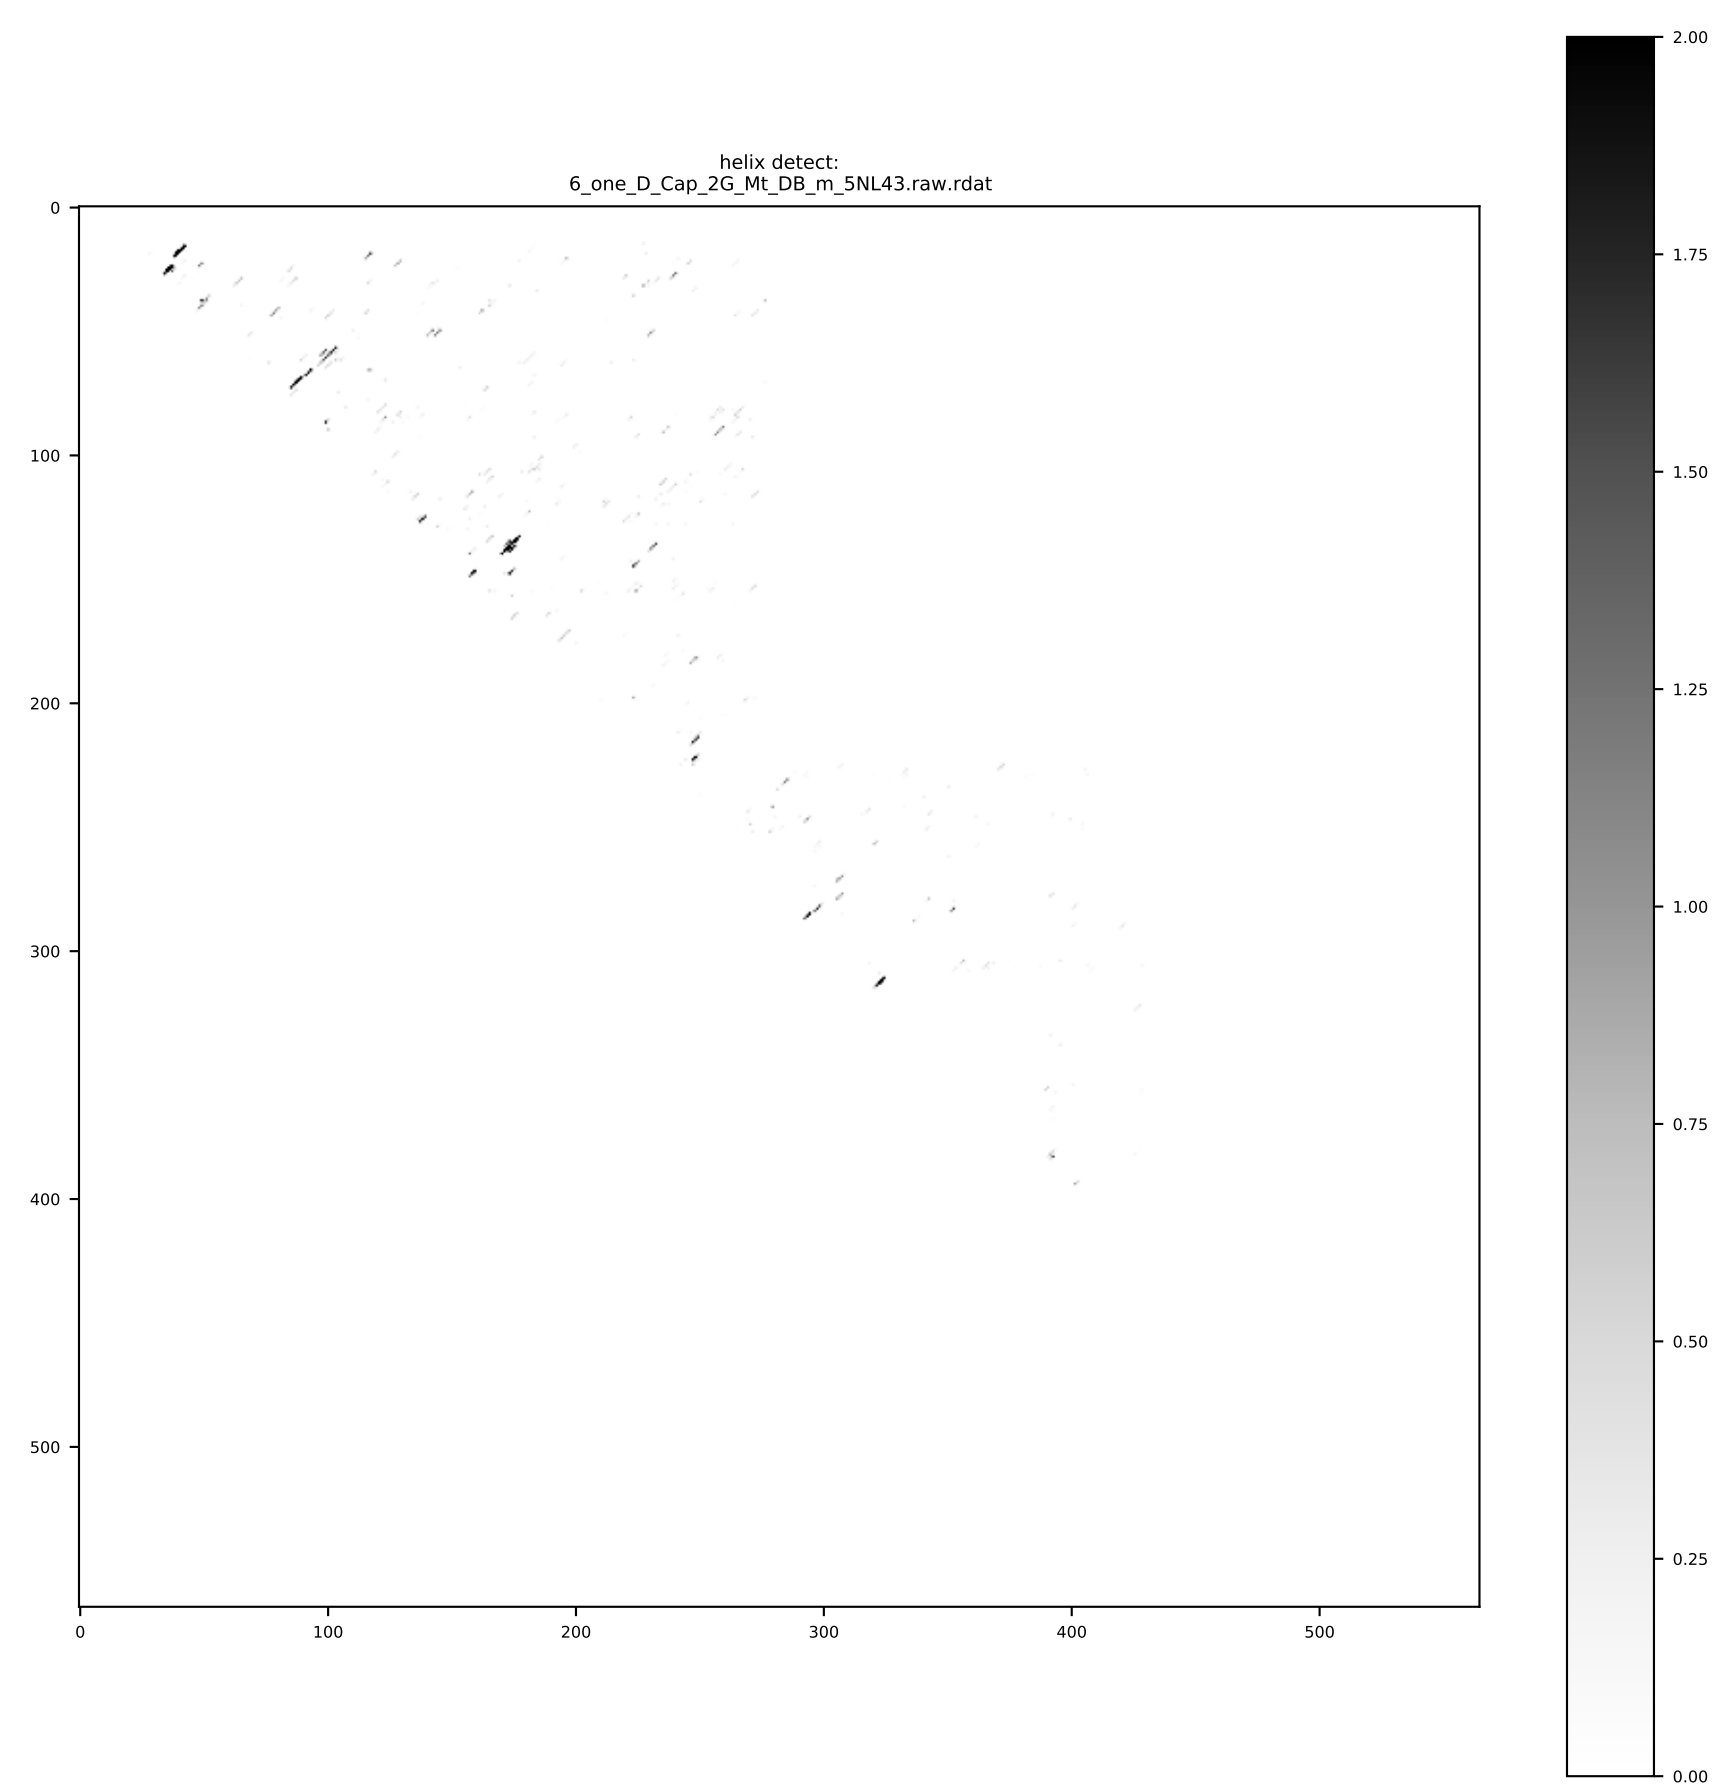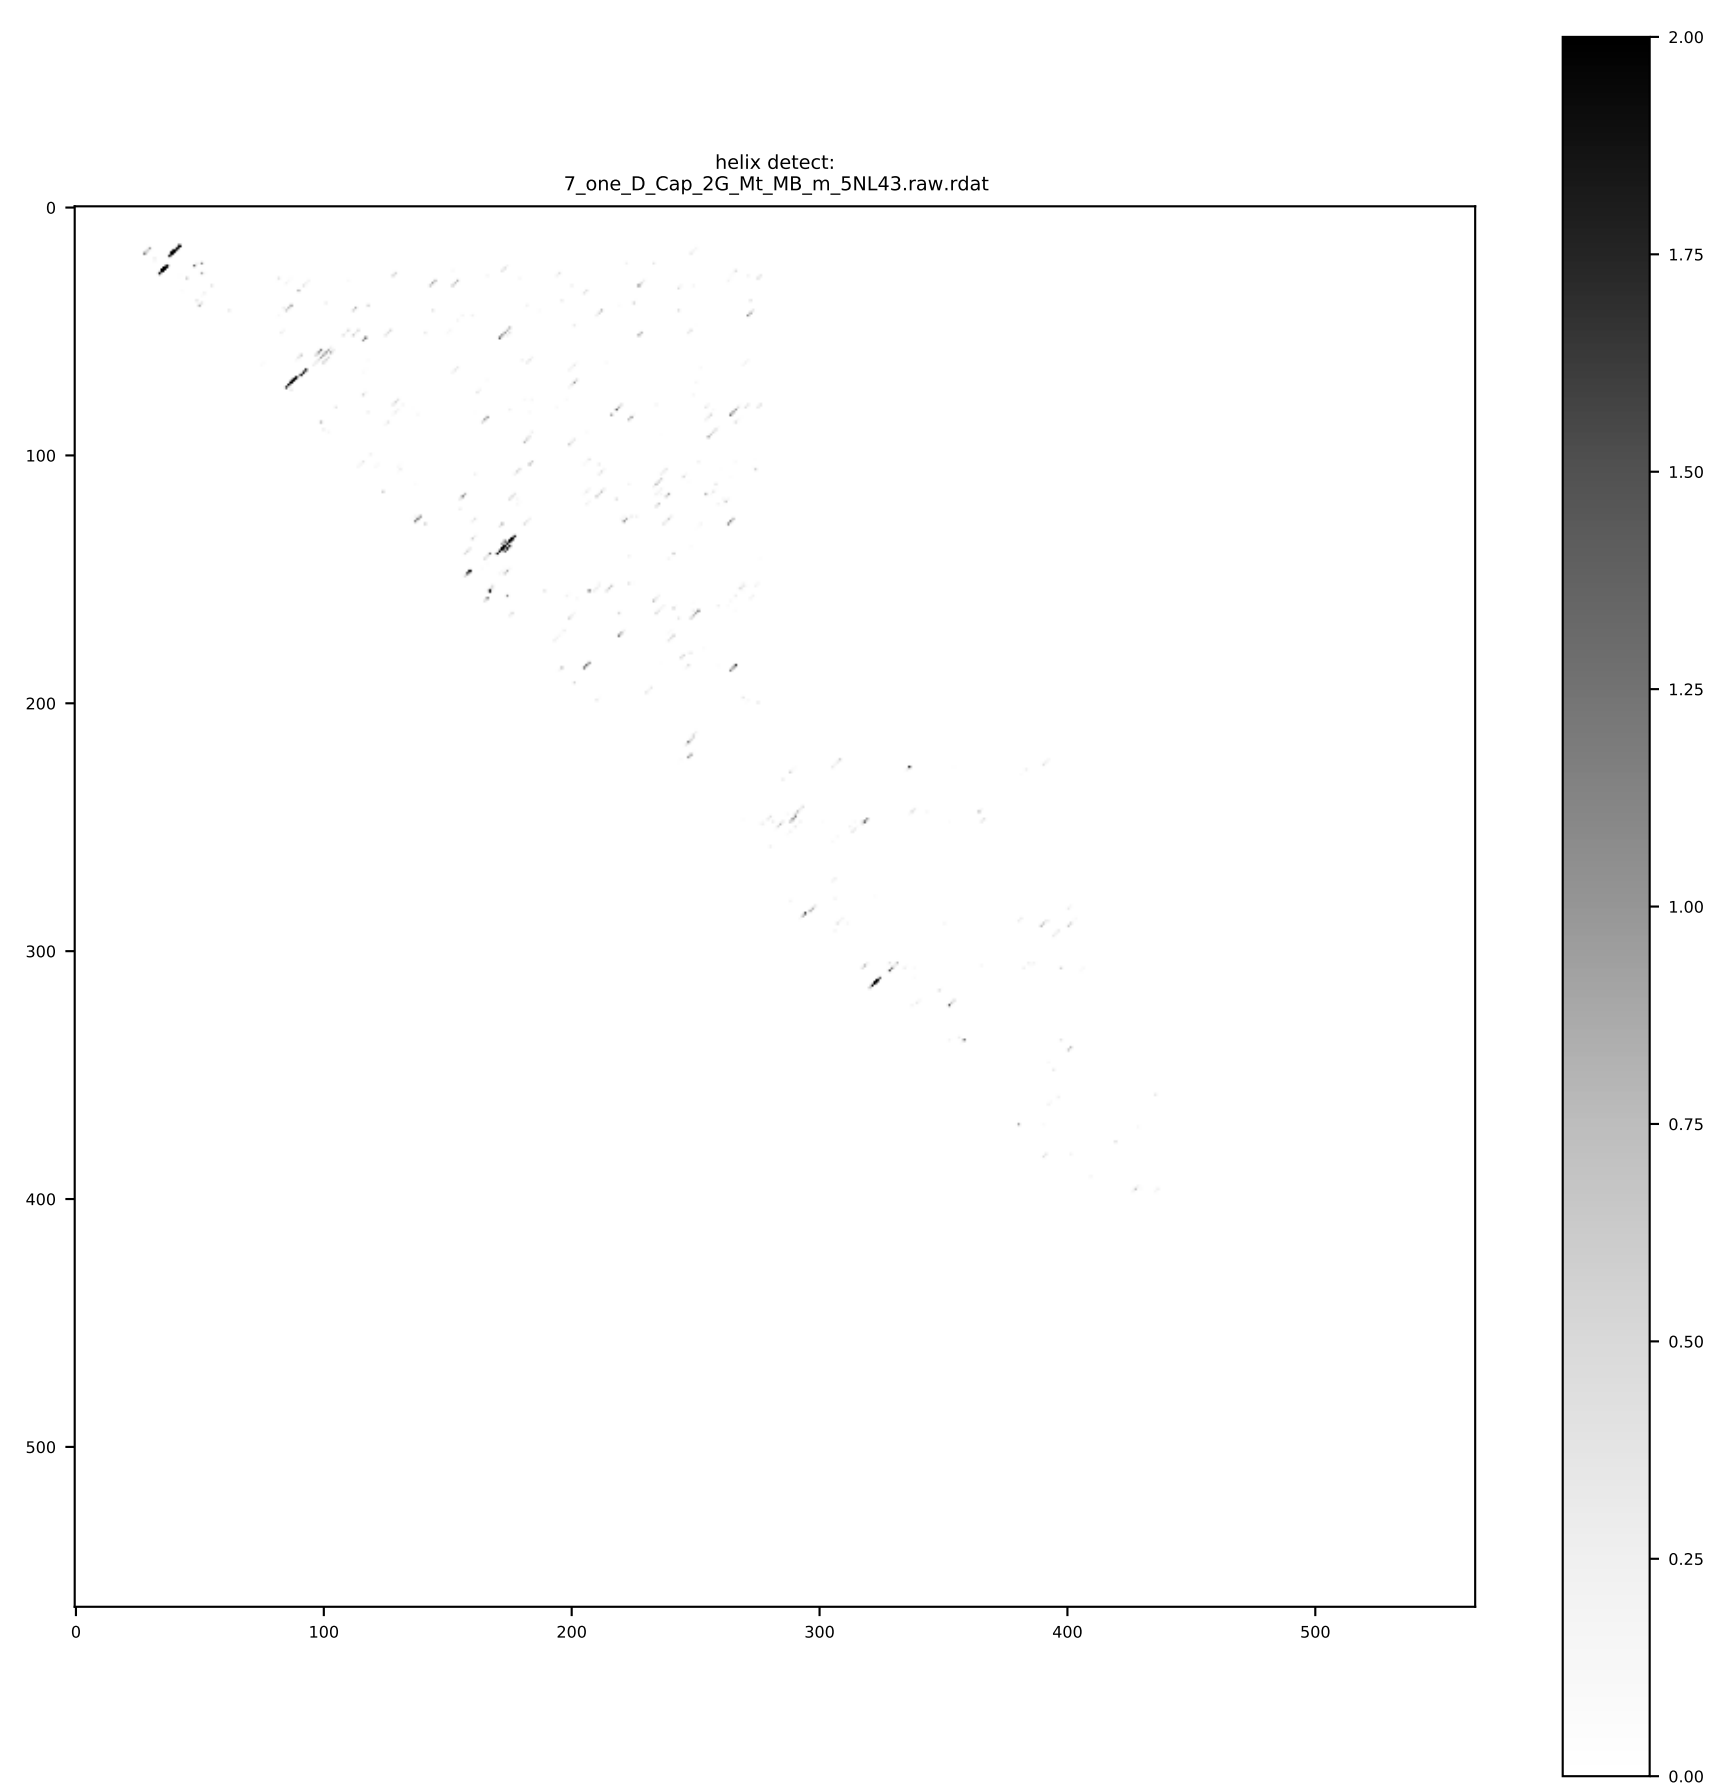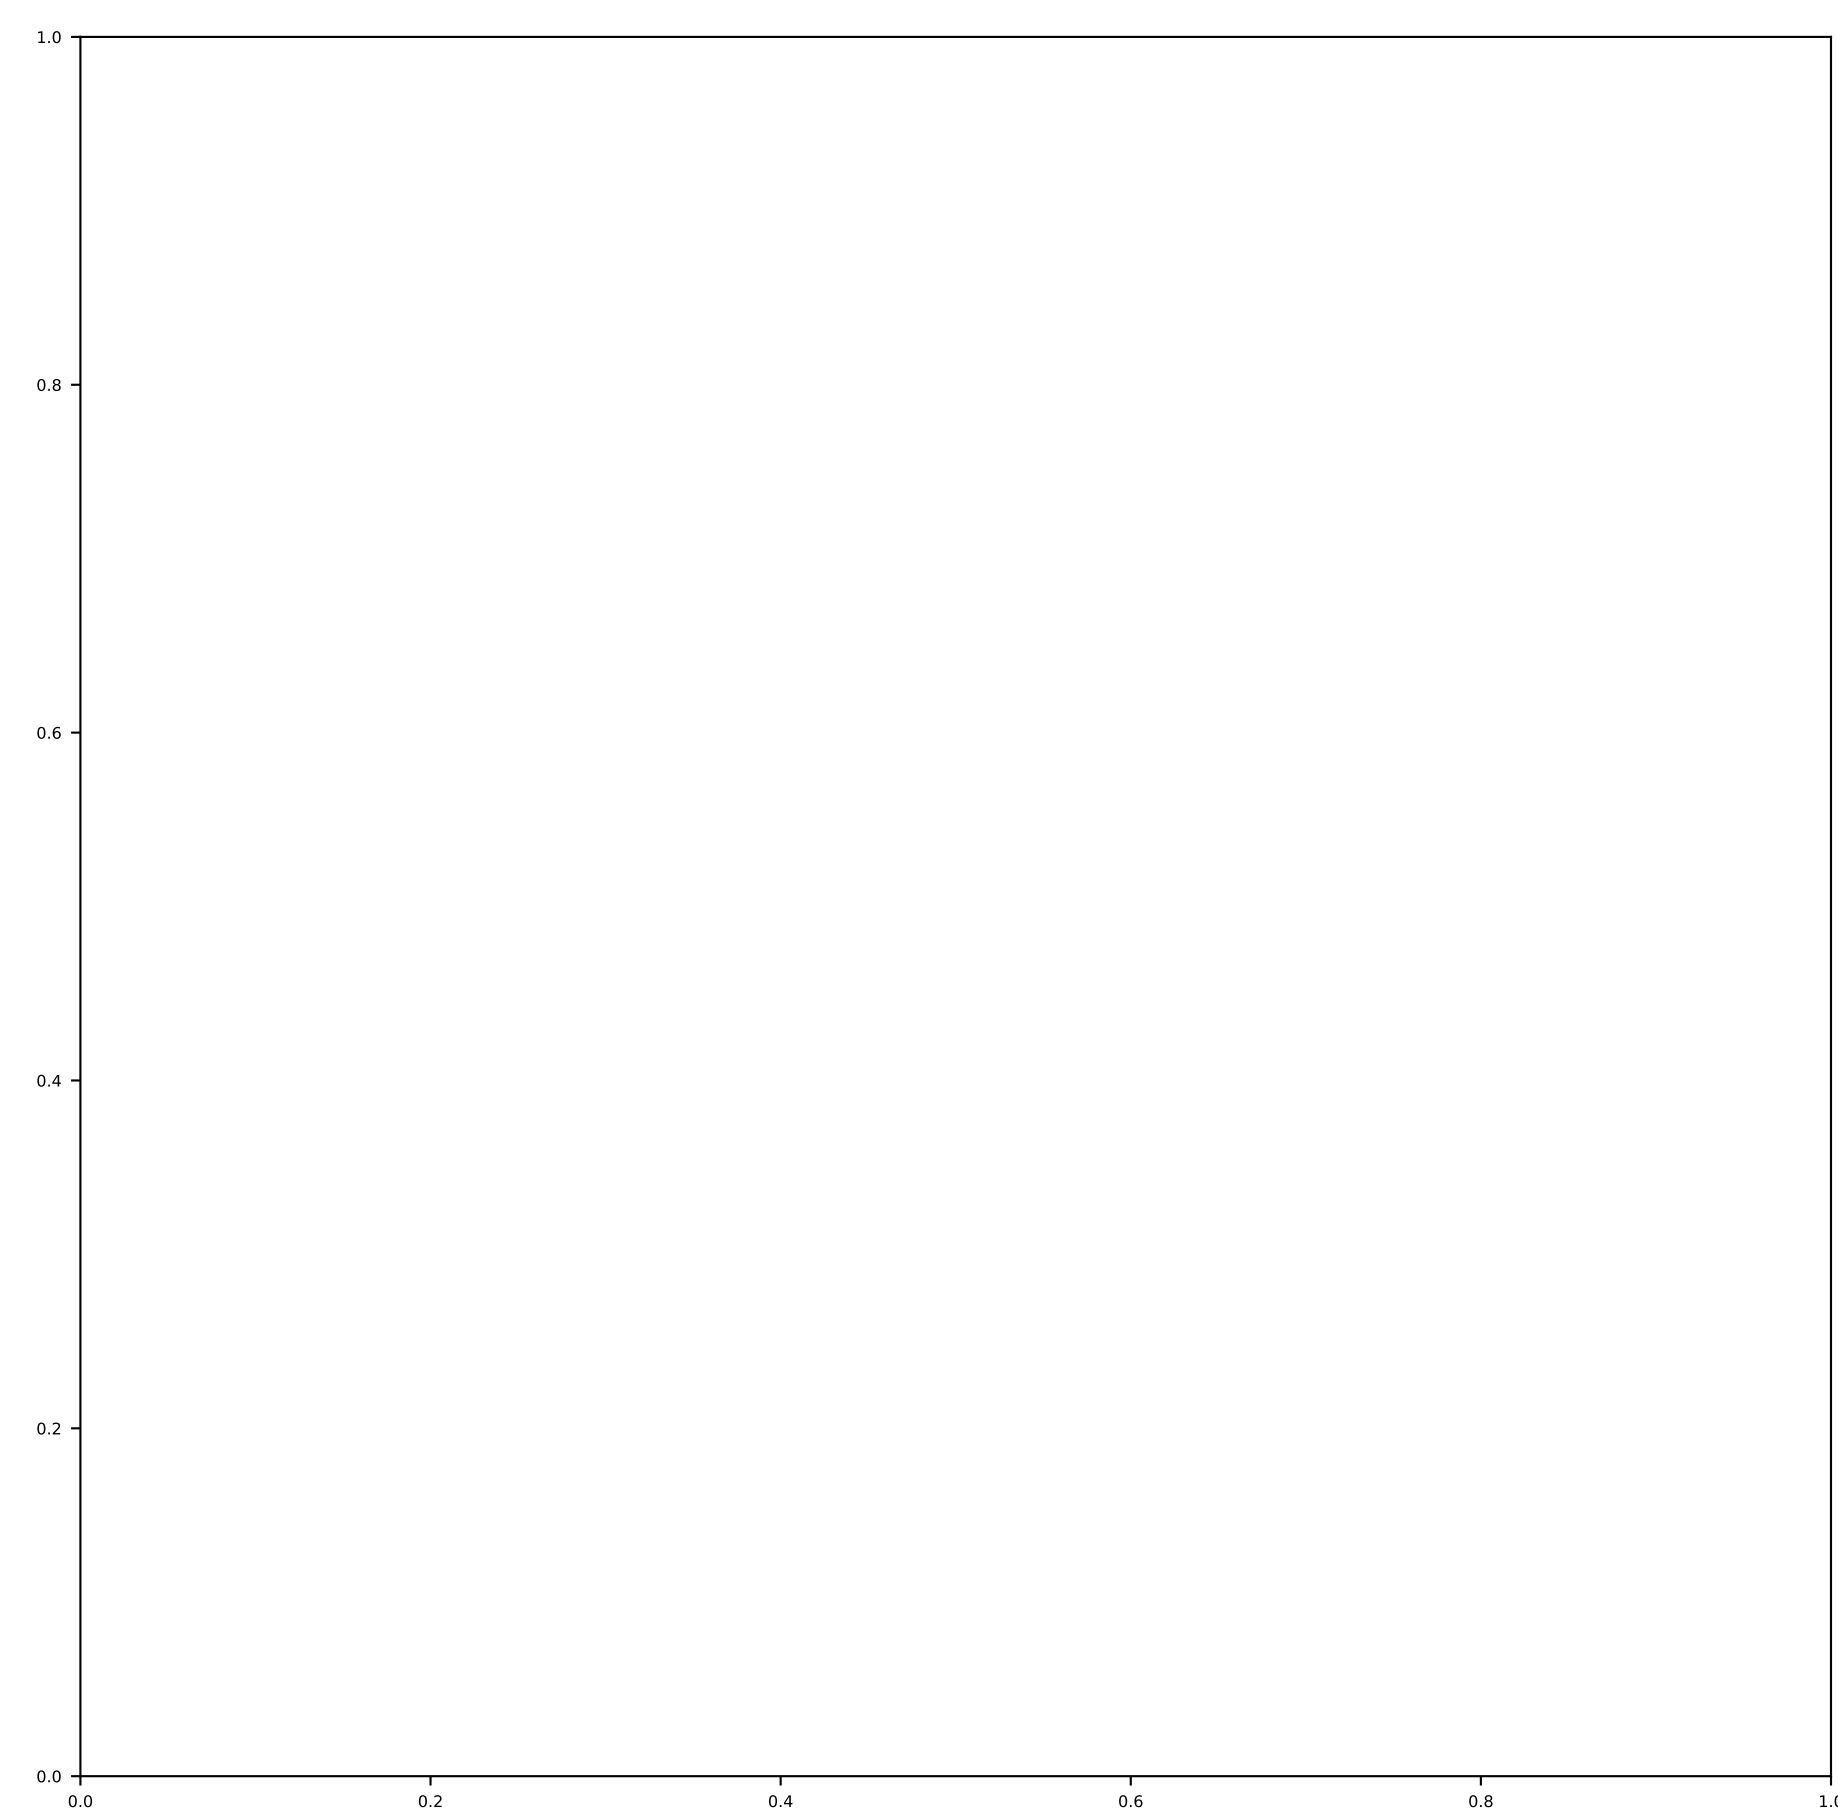

Supplement: Supplementary file 20 [file one_two_G_monomer_detected_helix.pdf › 2d-structure-inference/detected_helix/one_two_G_monomer_detected_helix.pdf]

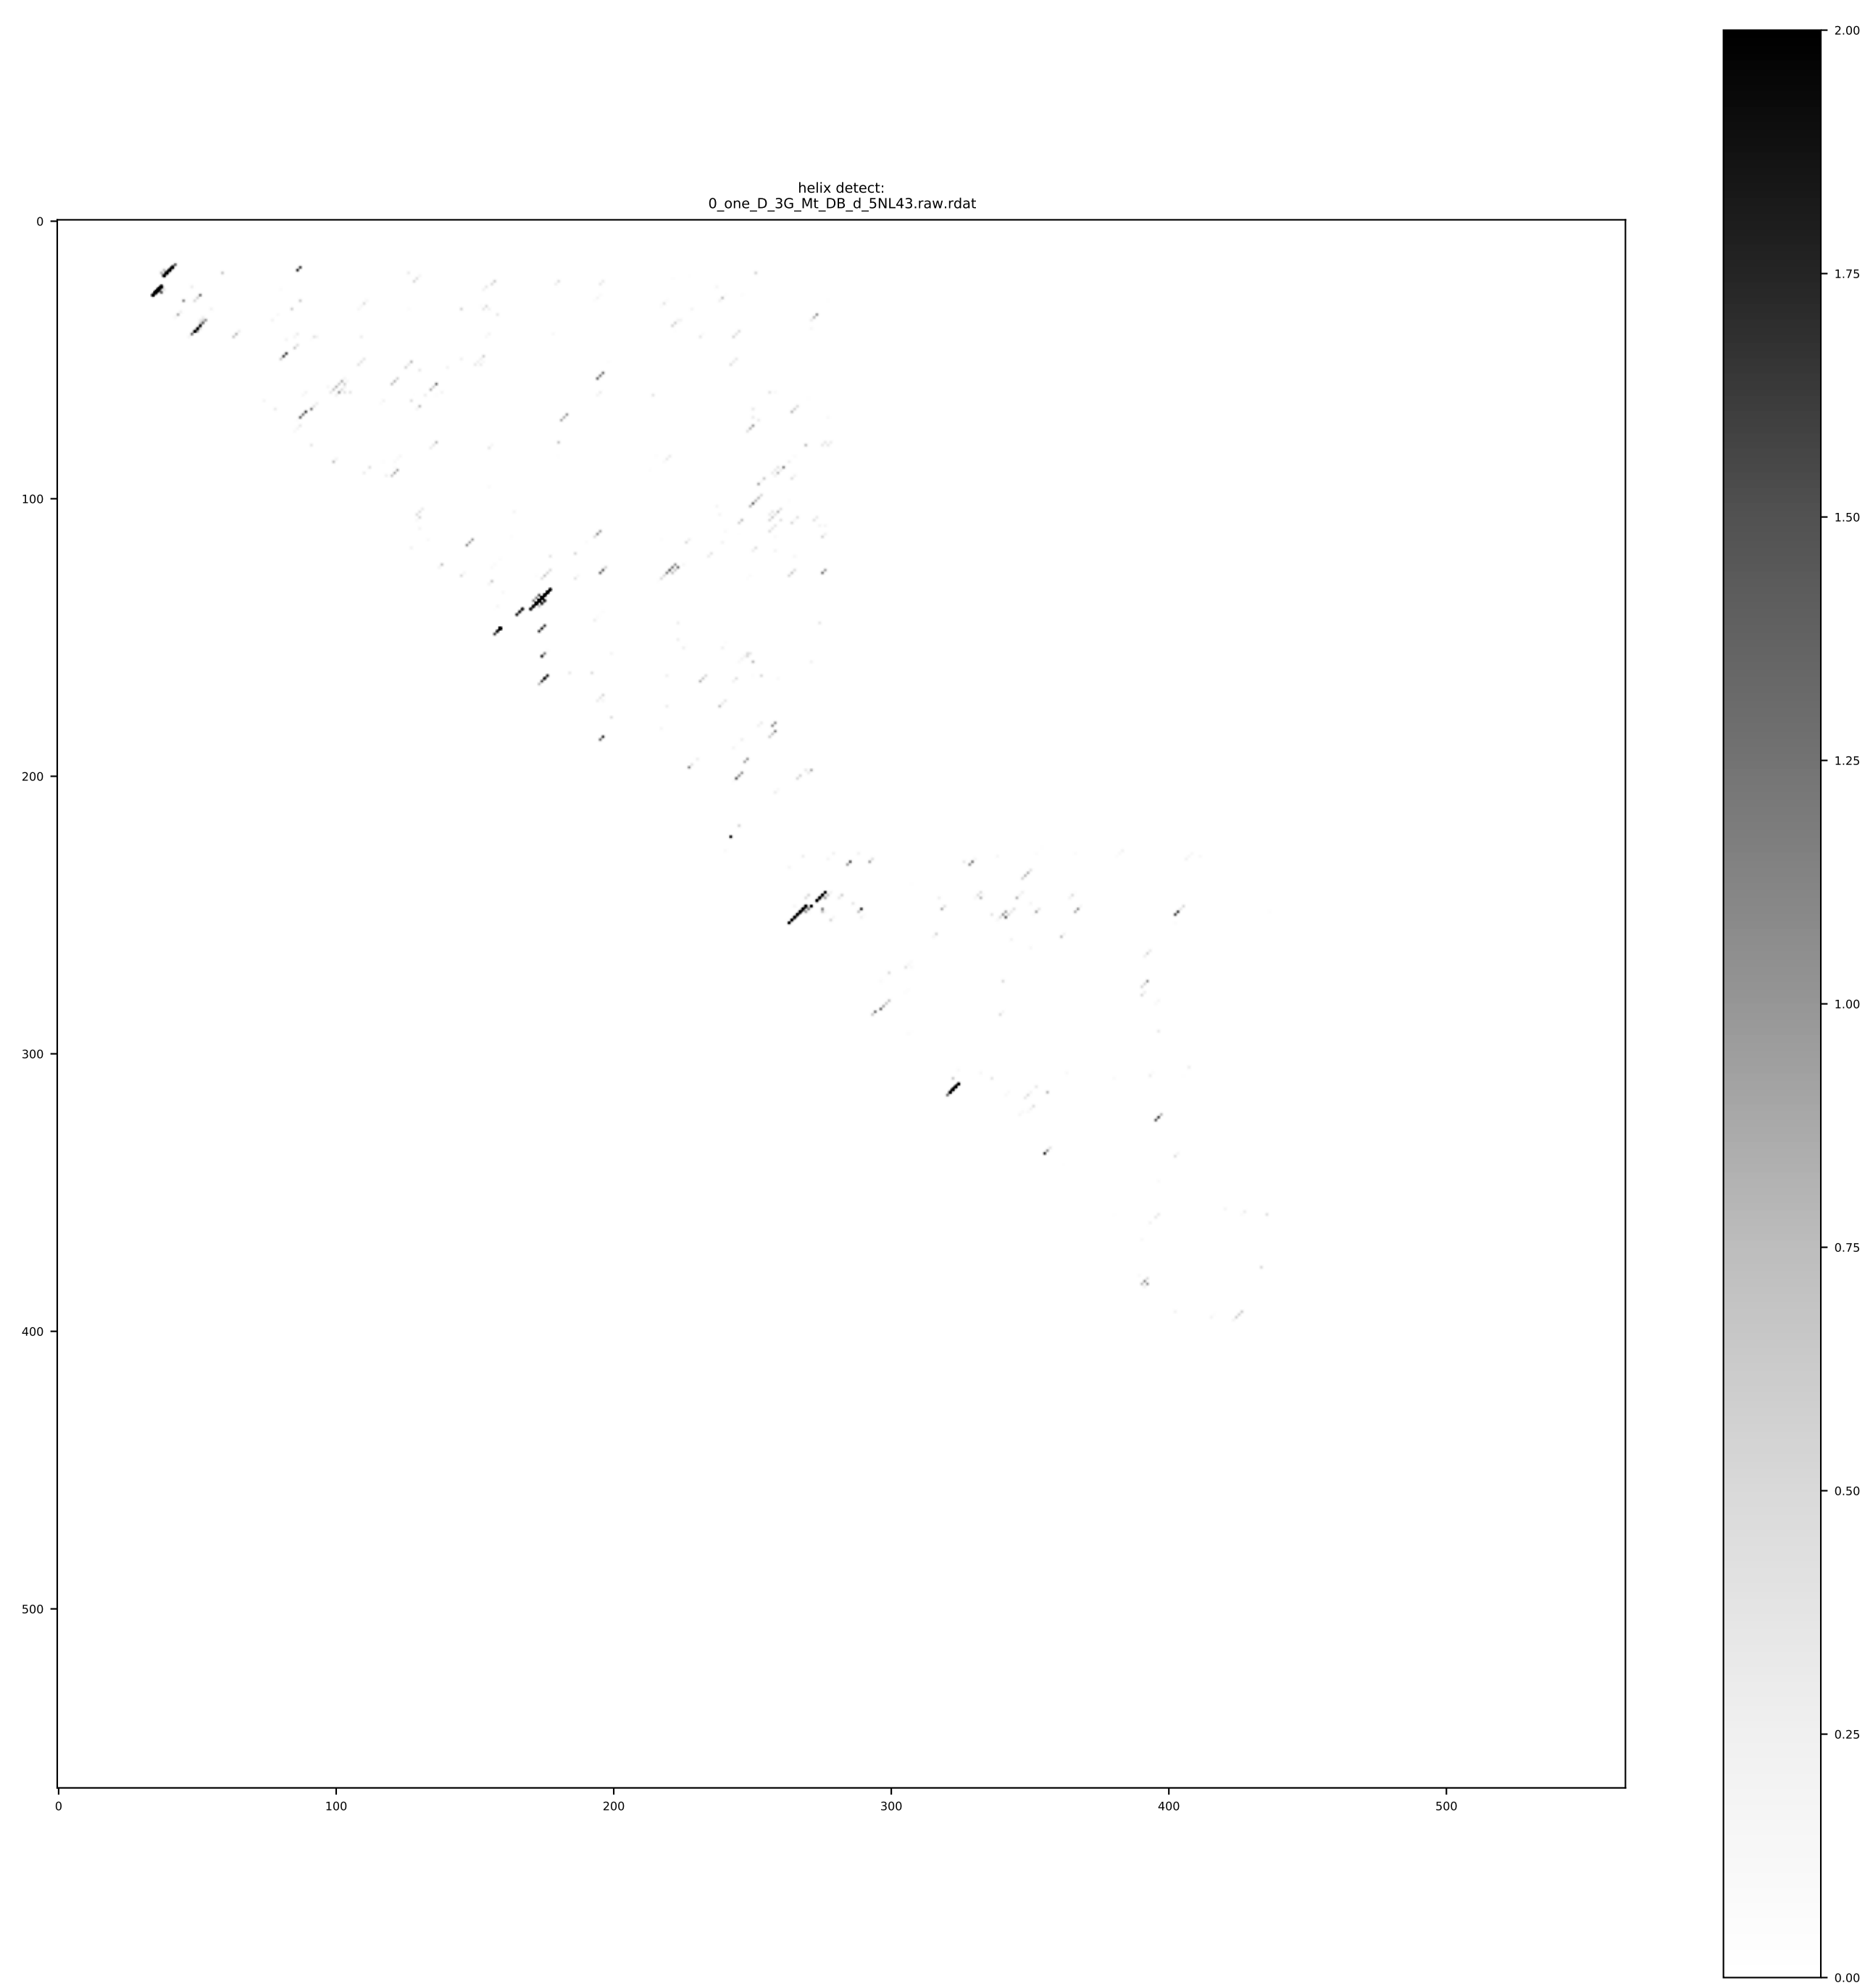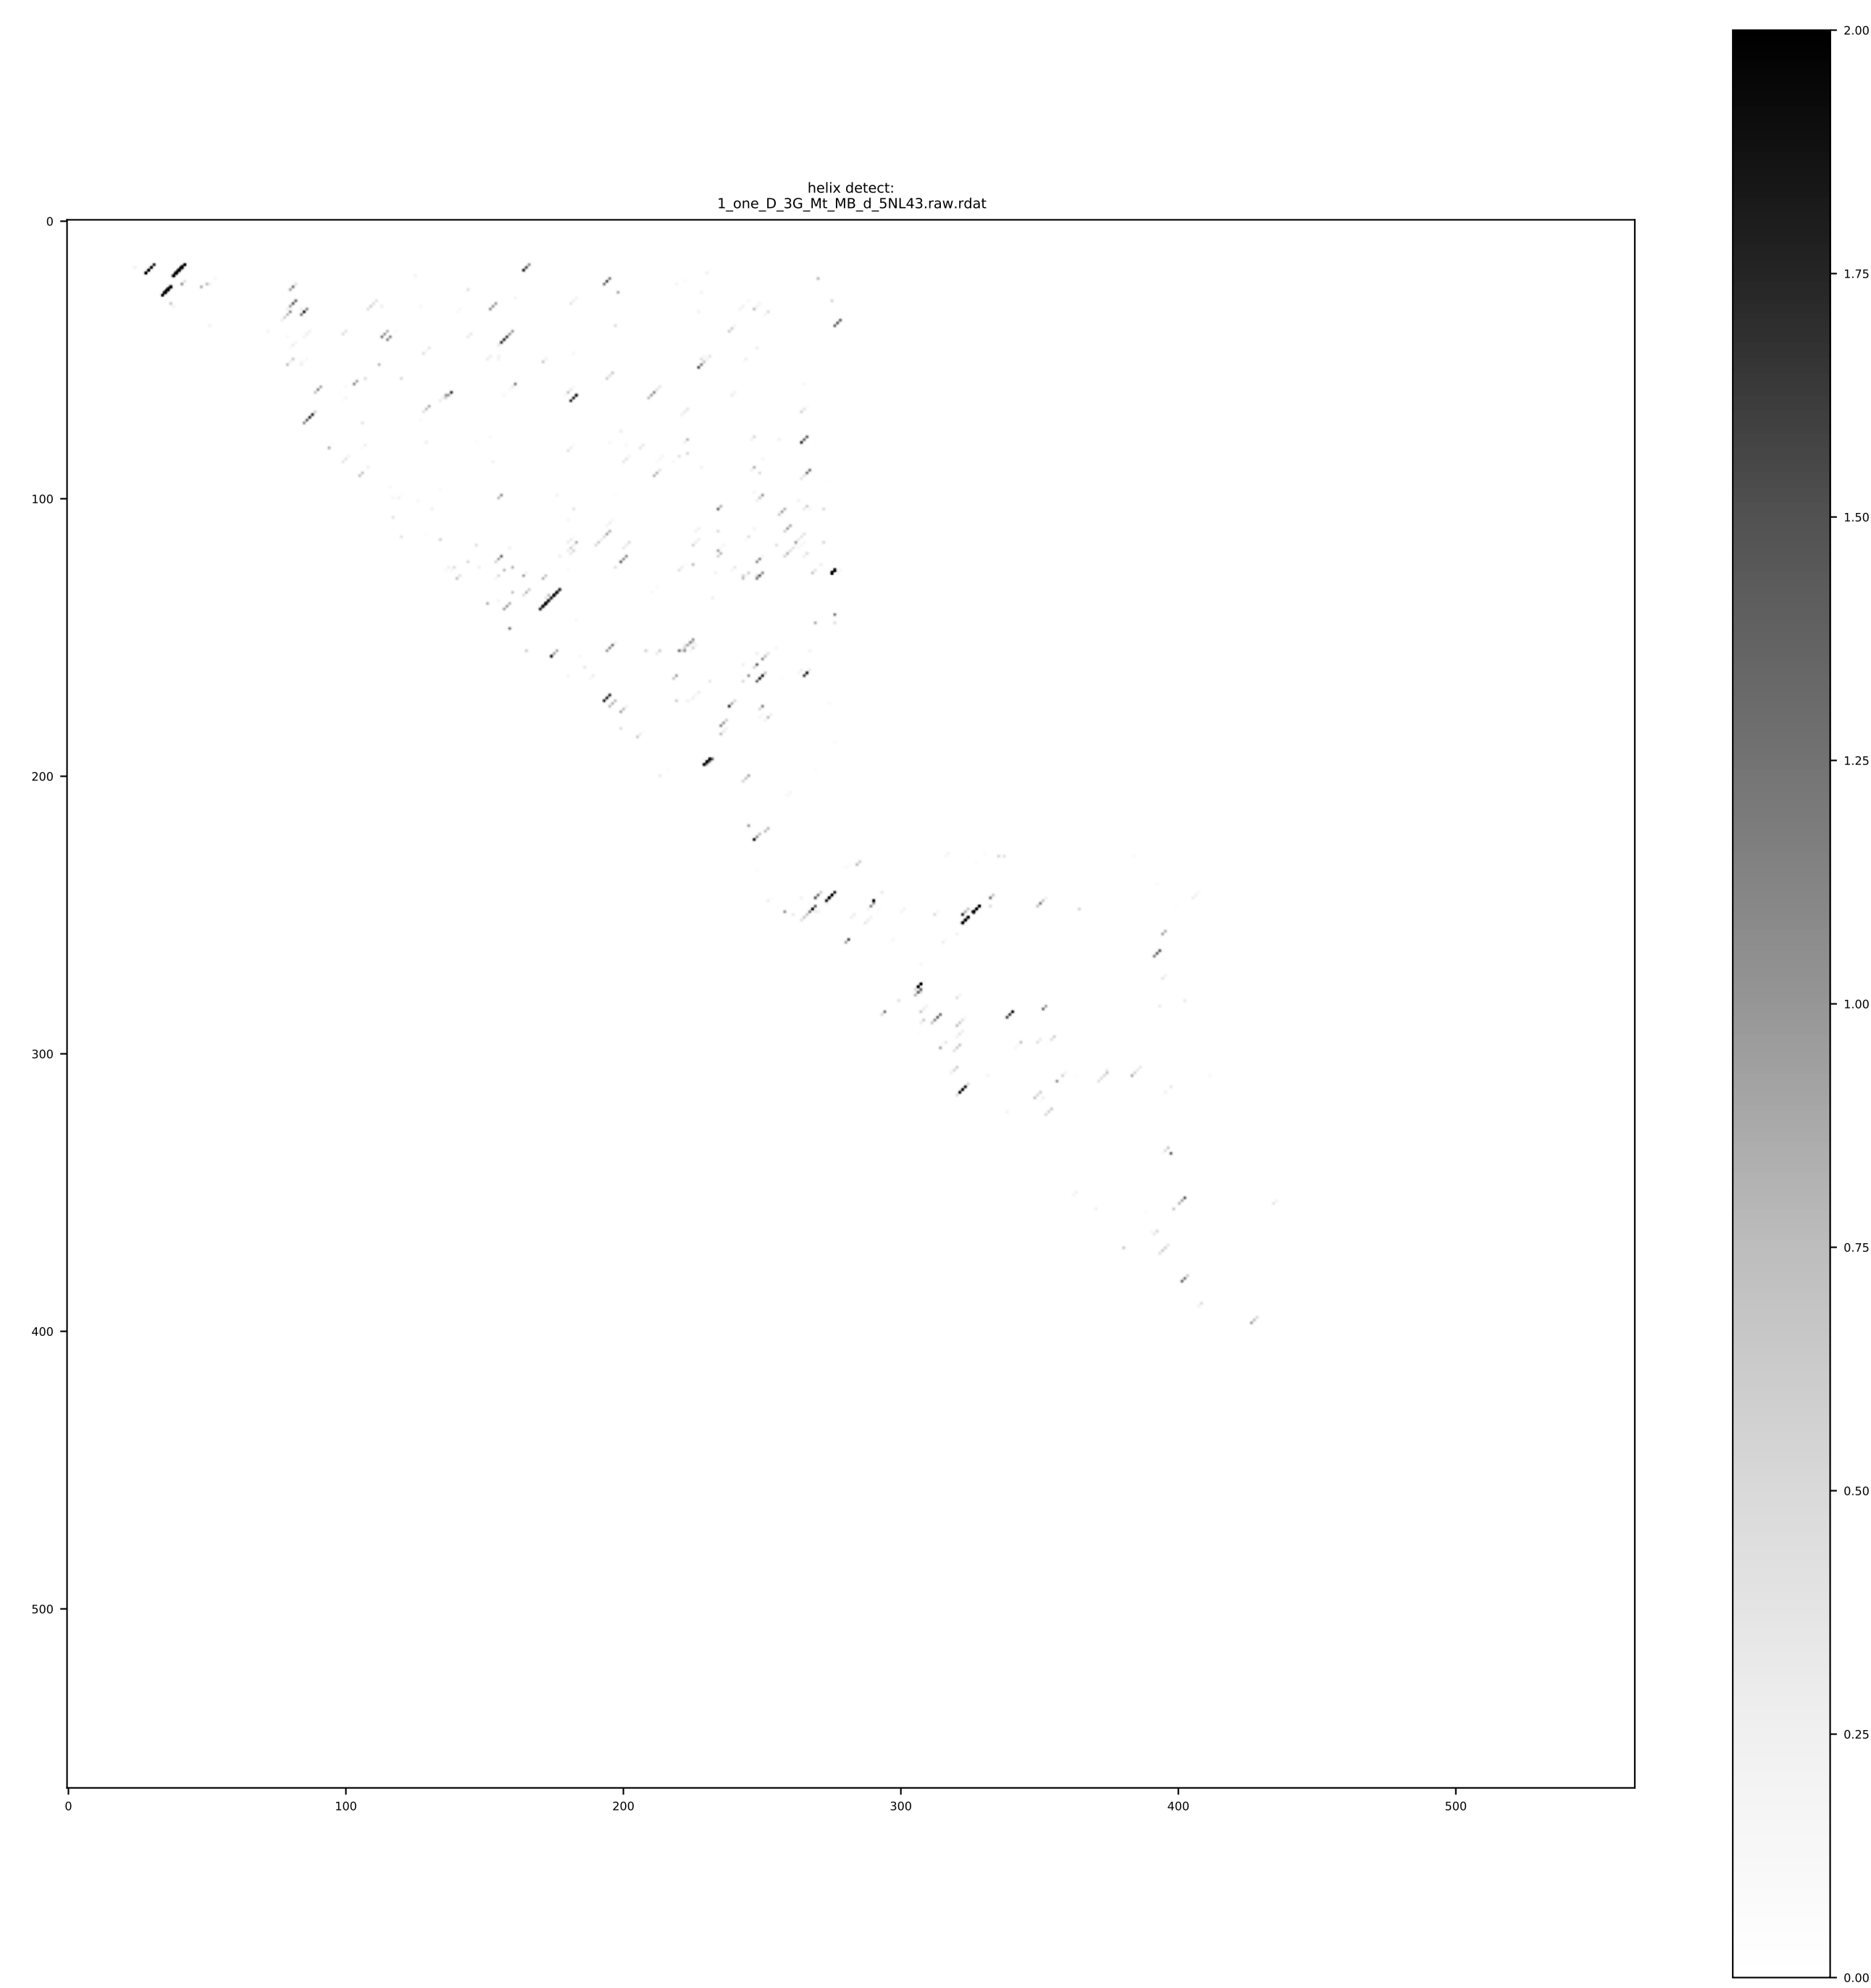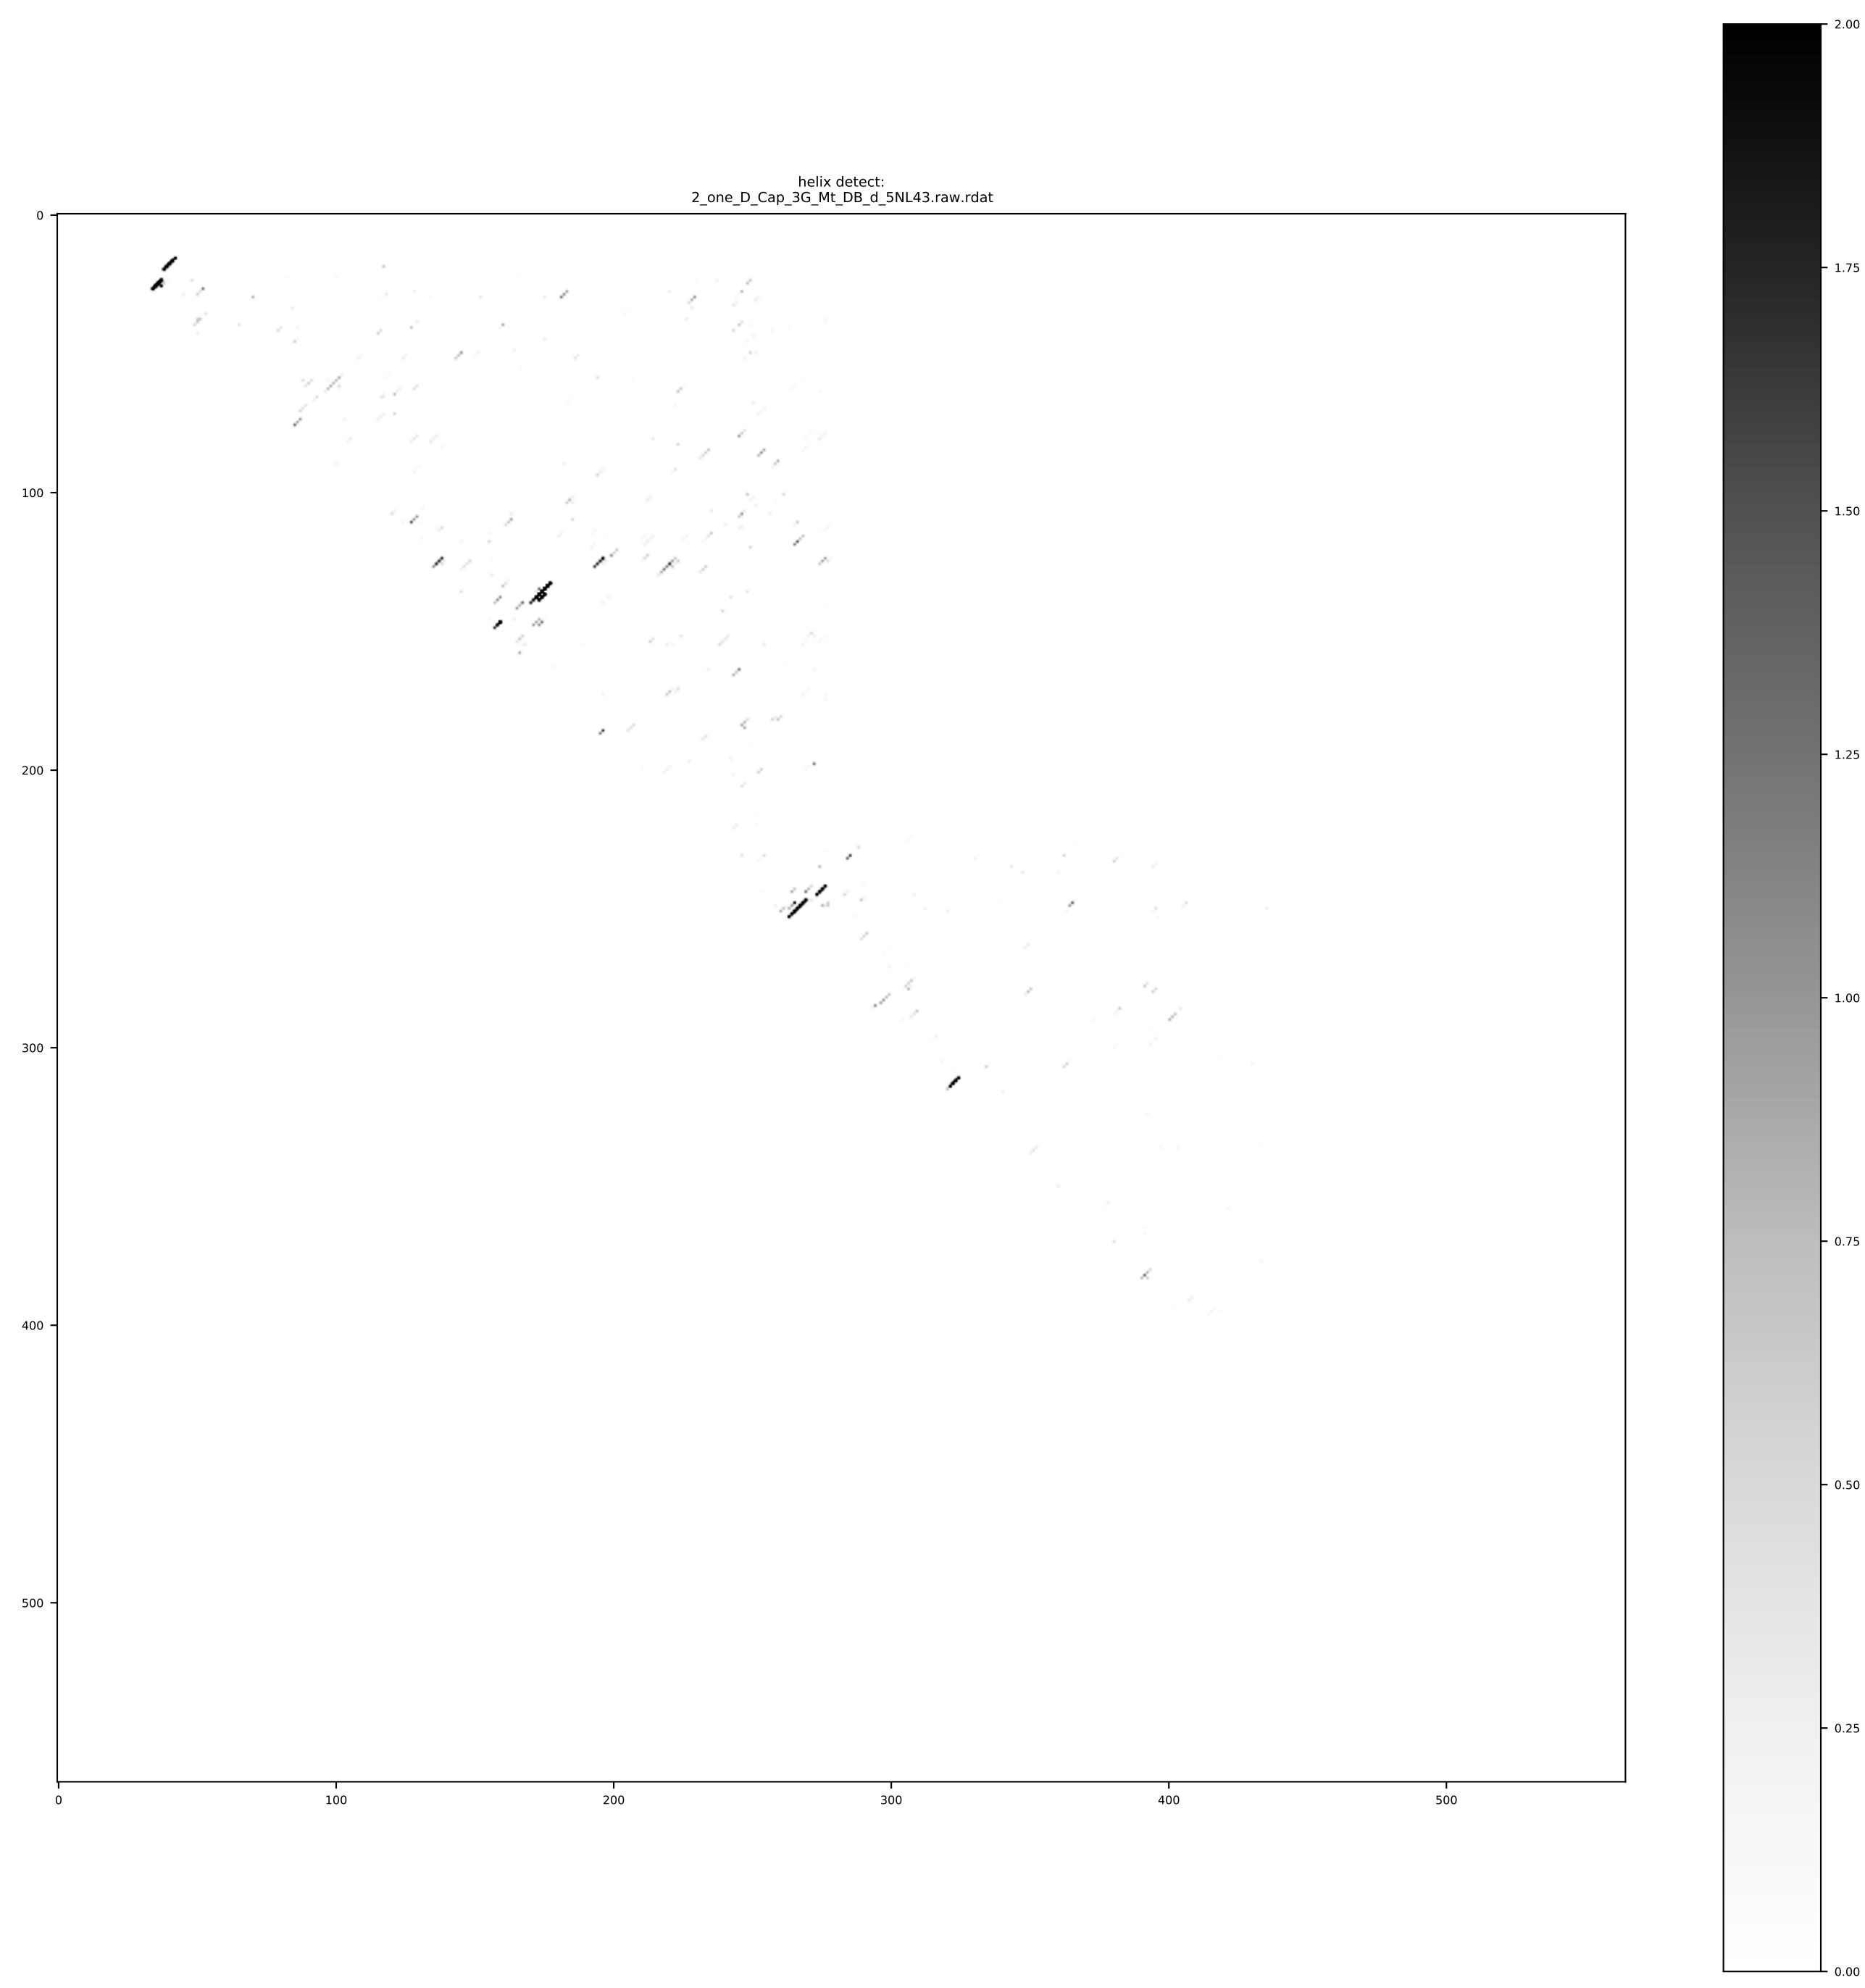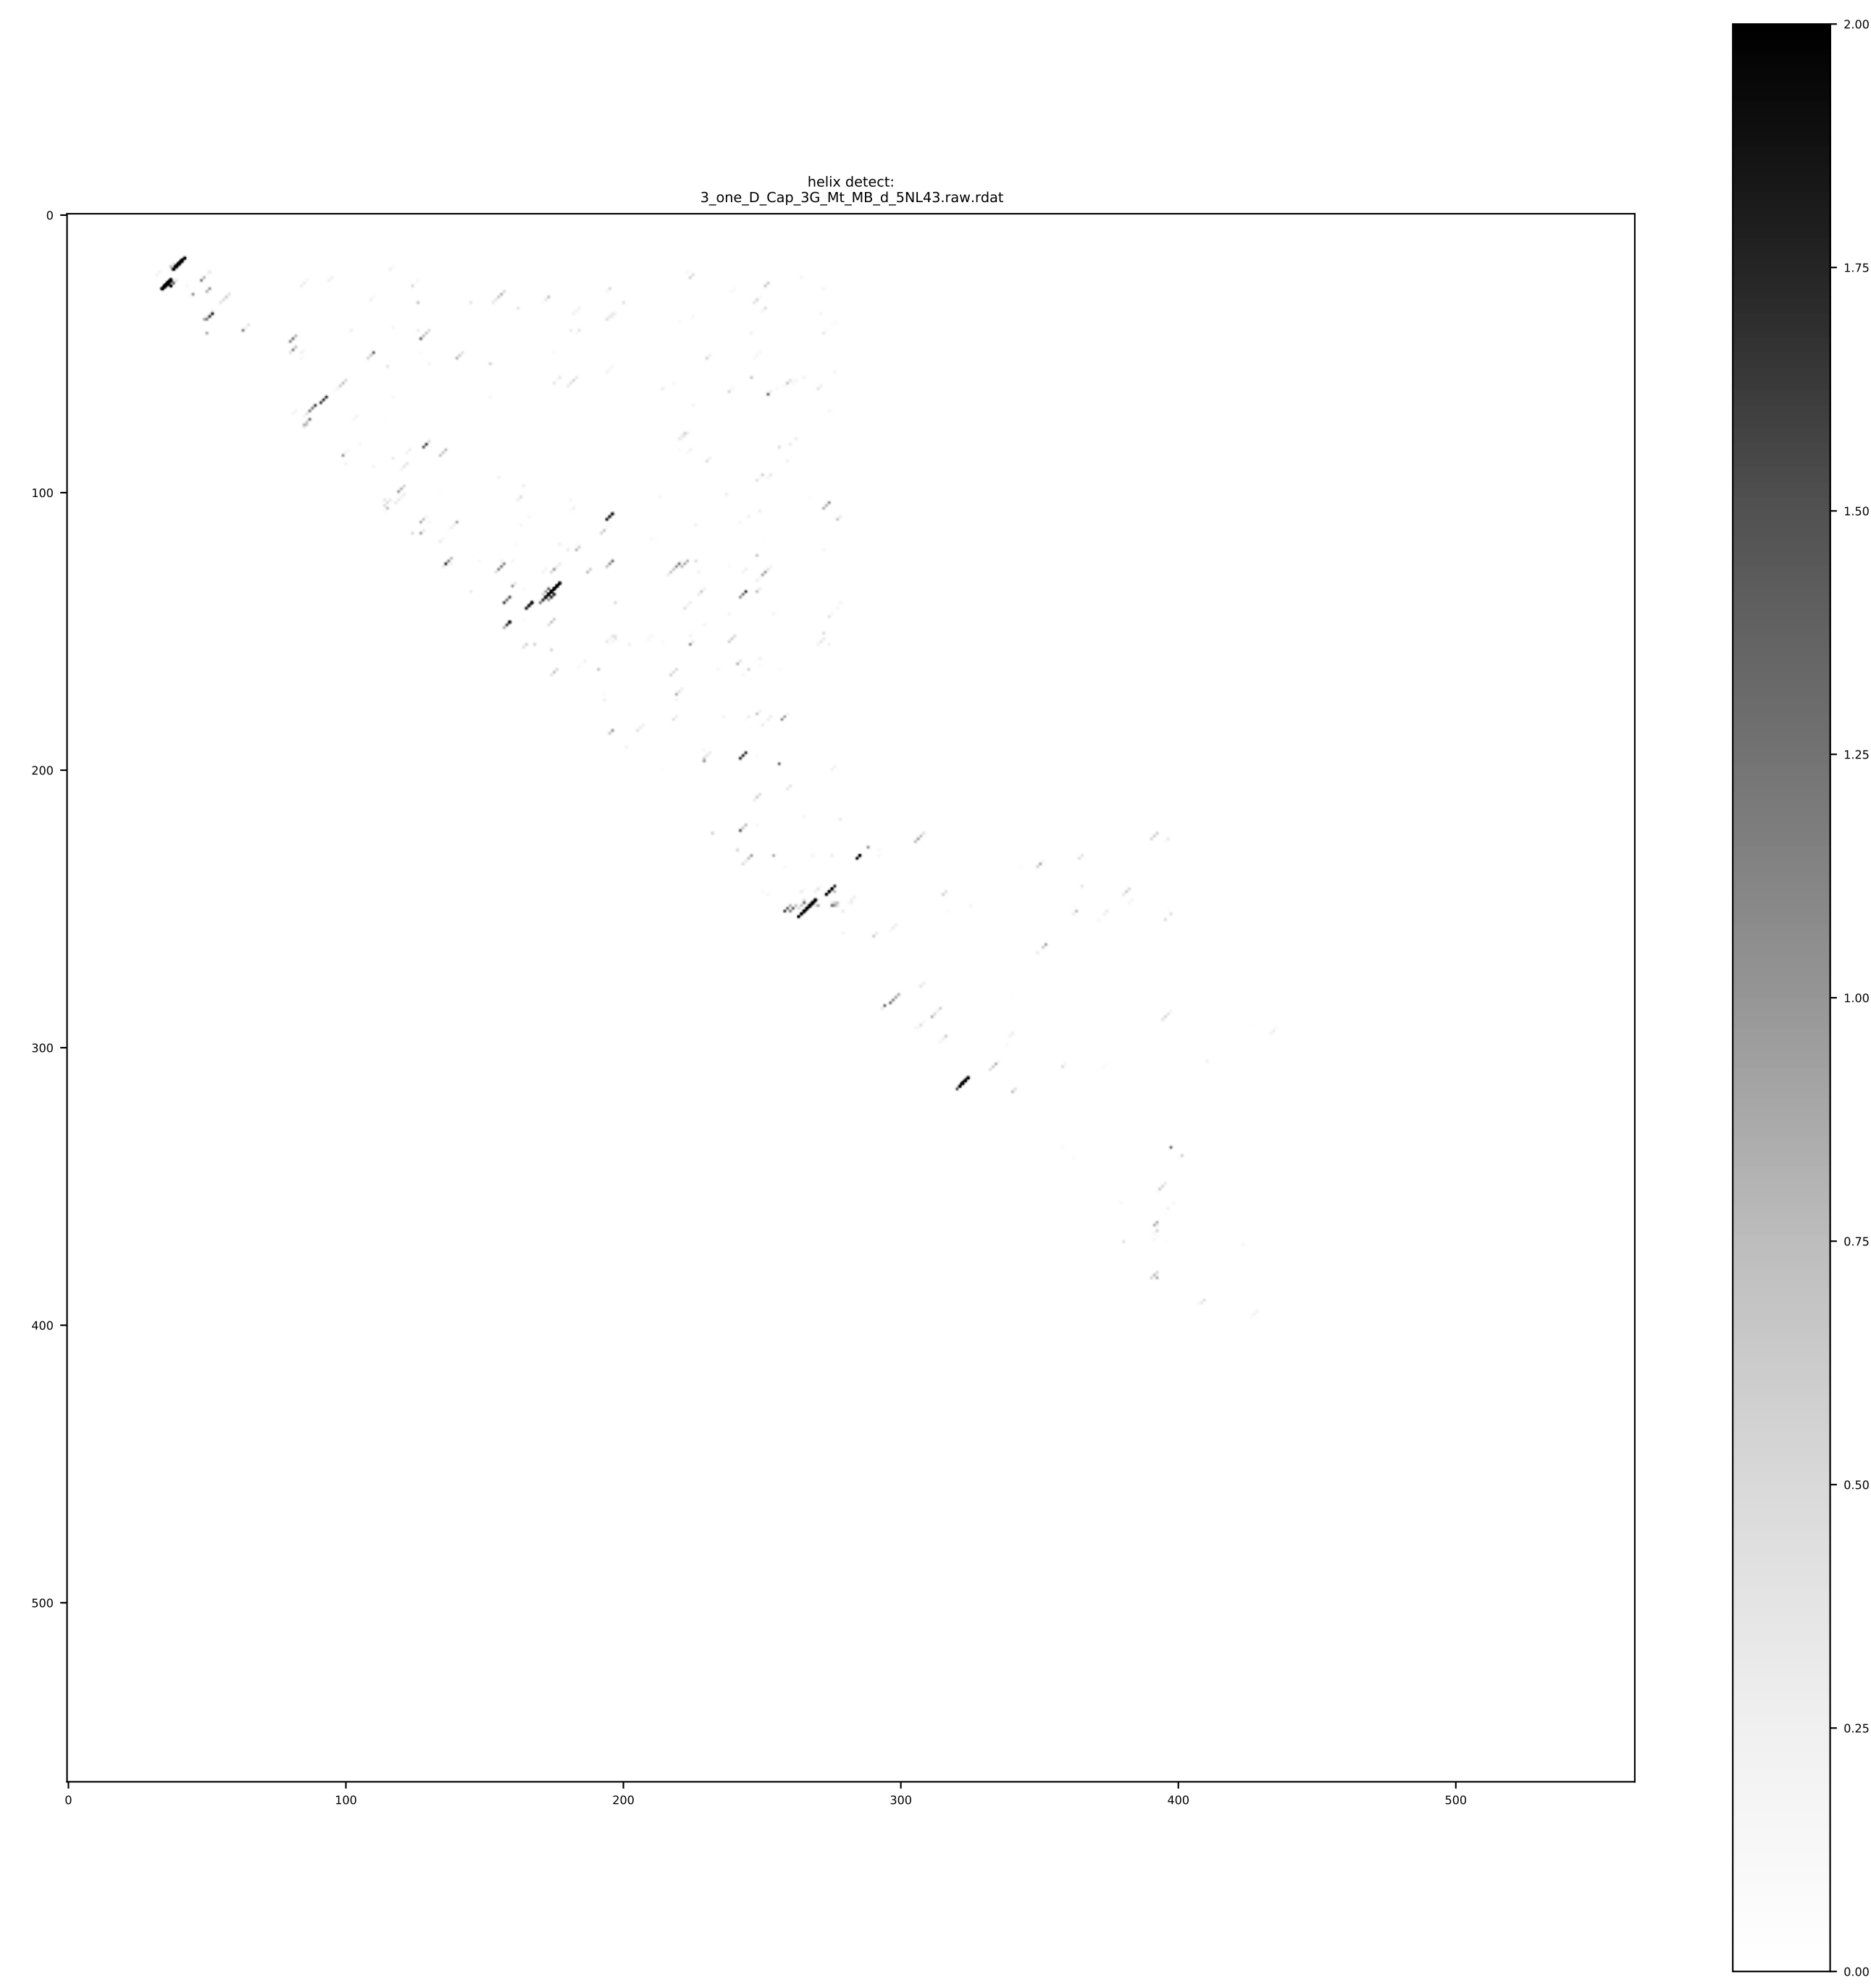

Supplement: Supplementary file 21 [file threeG_dimer_detected_helix.pdf › 2d-structure-inference/detected_helix/threeG_dimer_detected_helix.pdf]

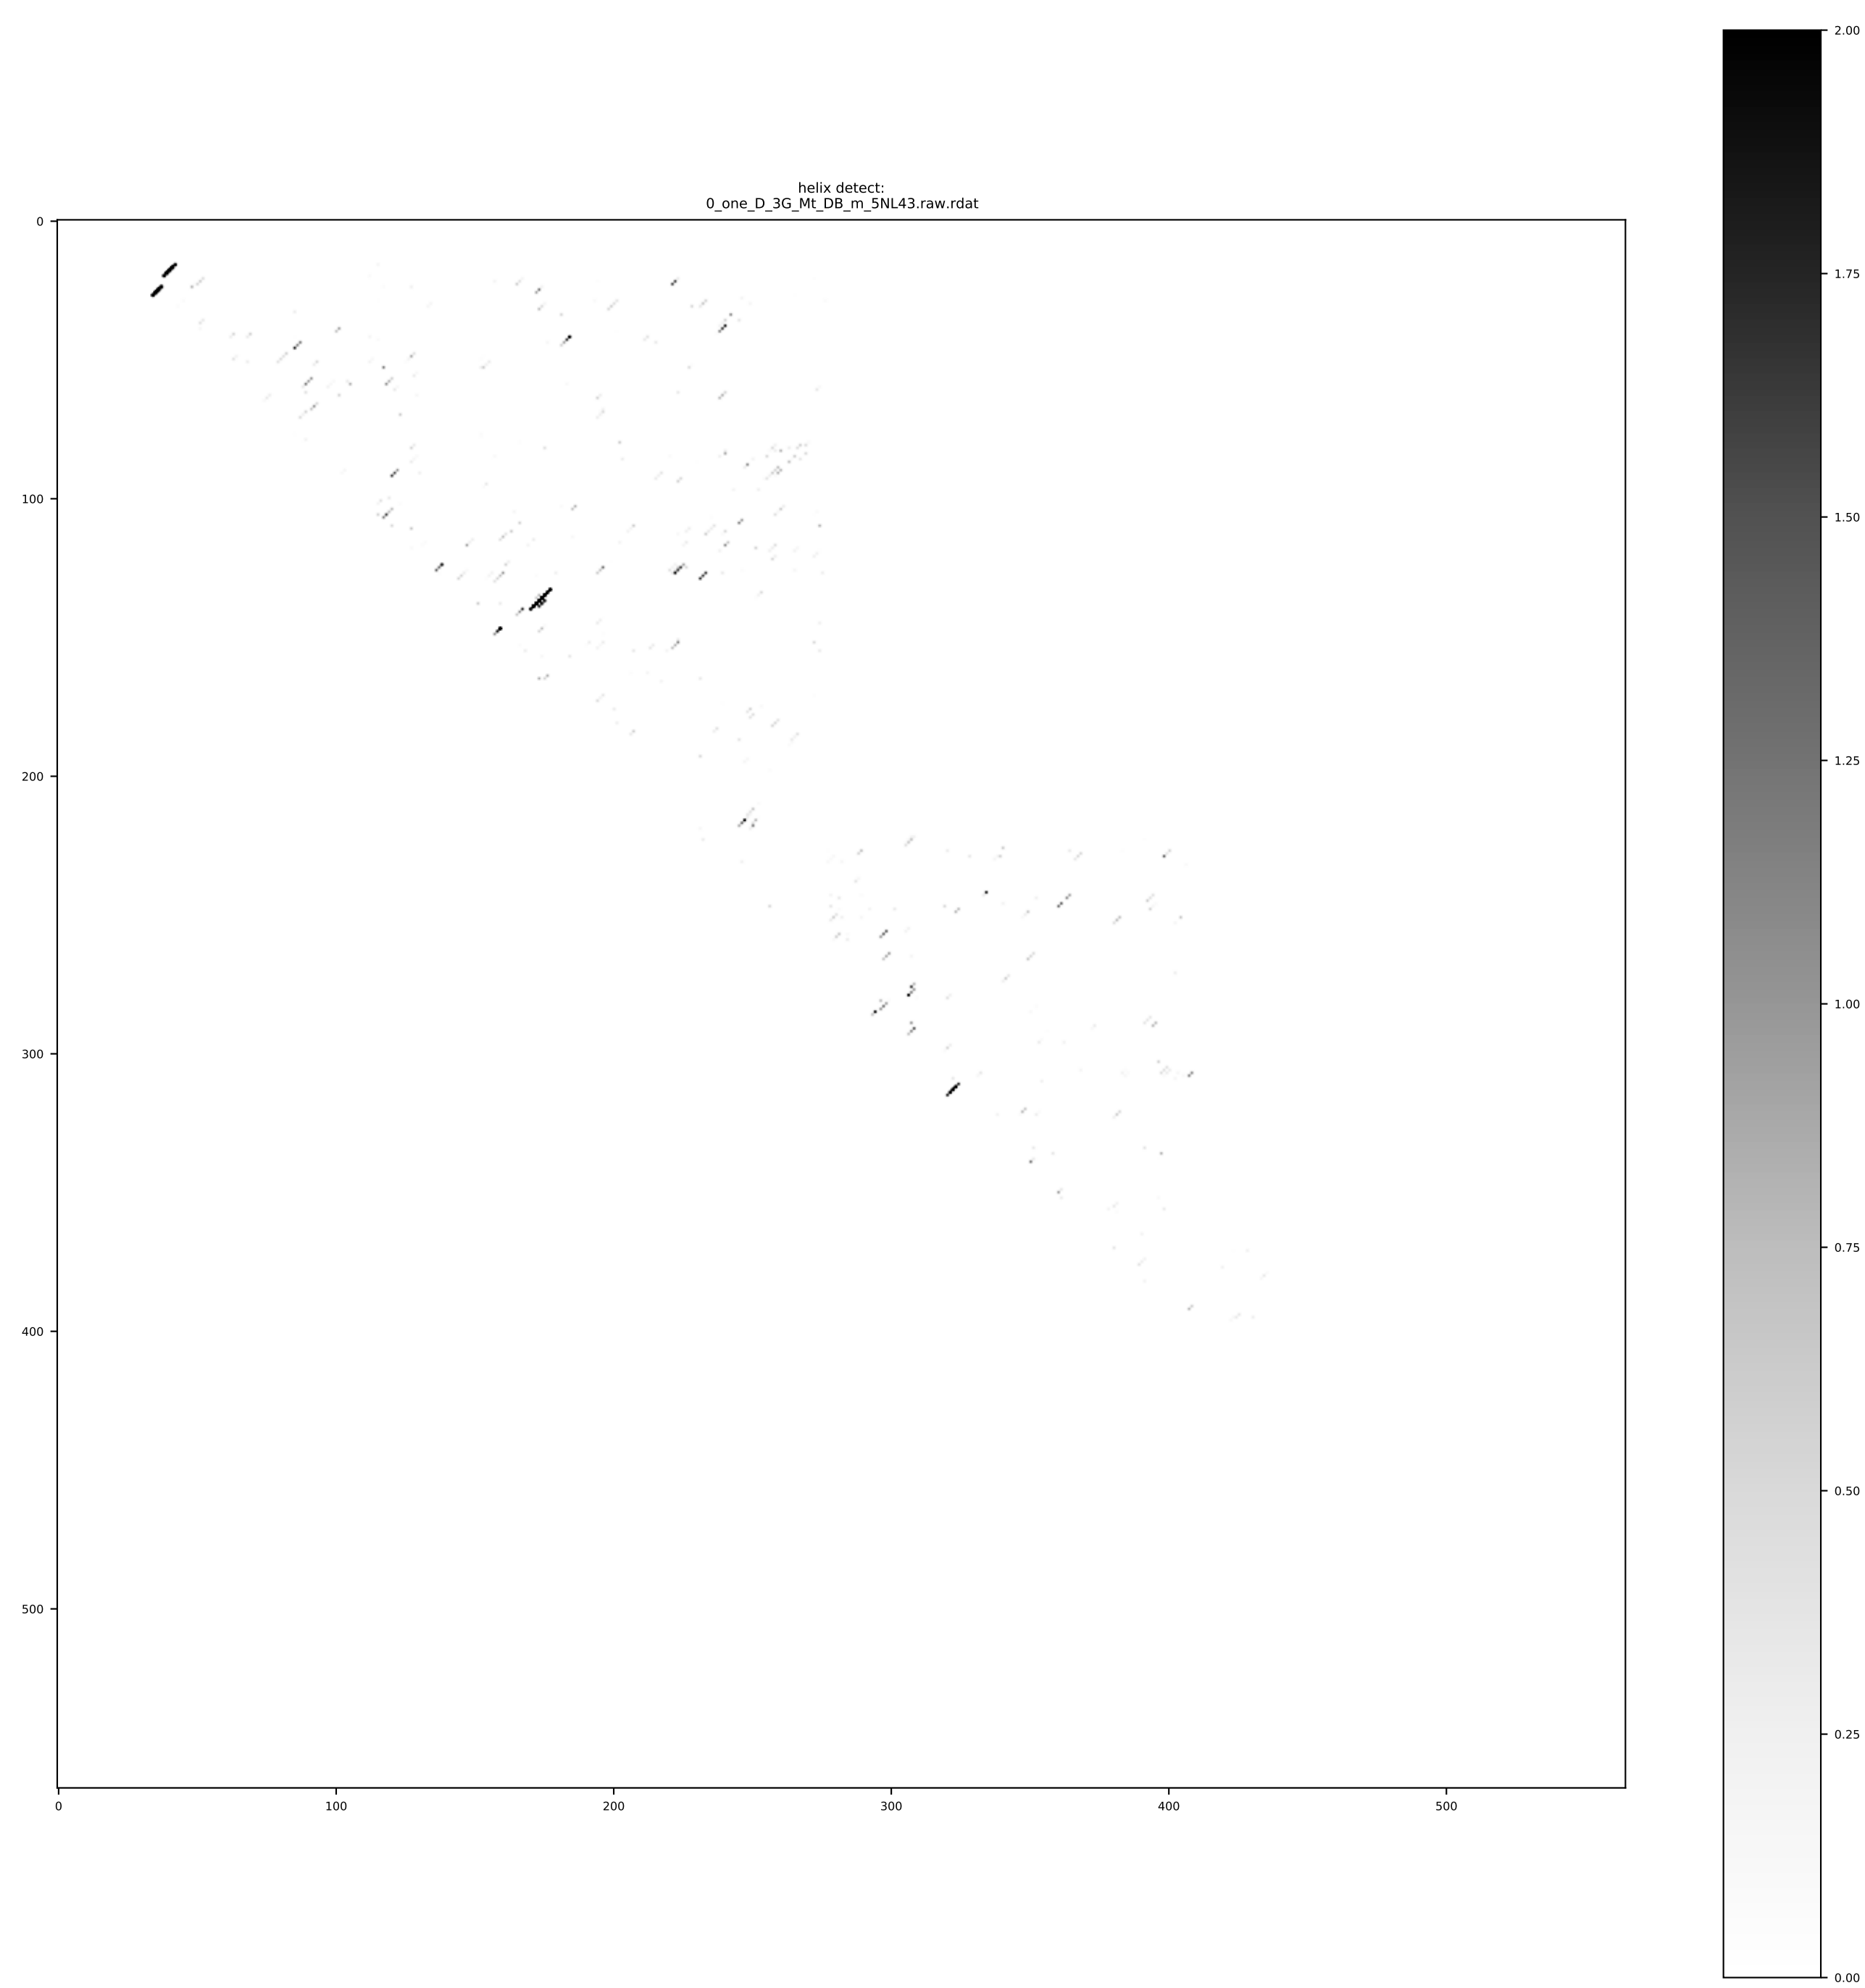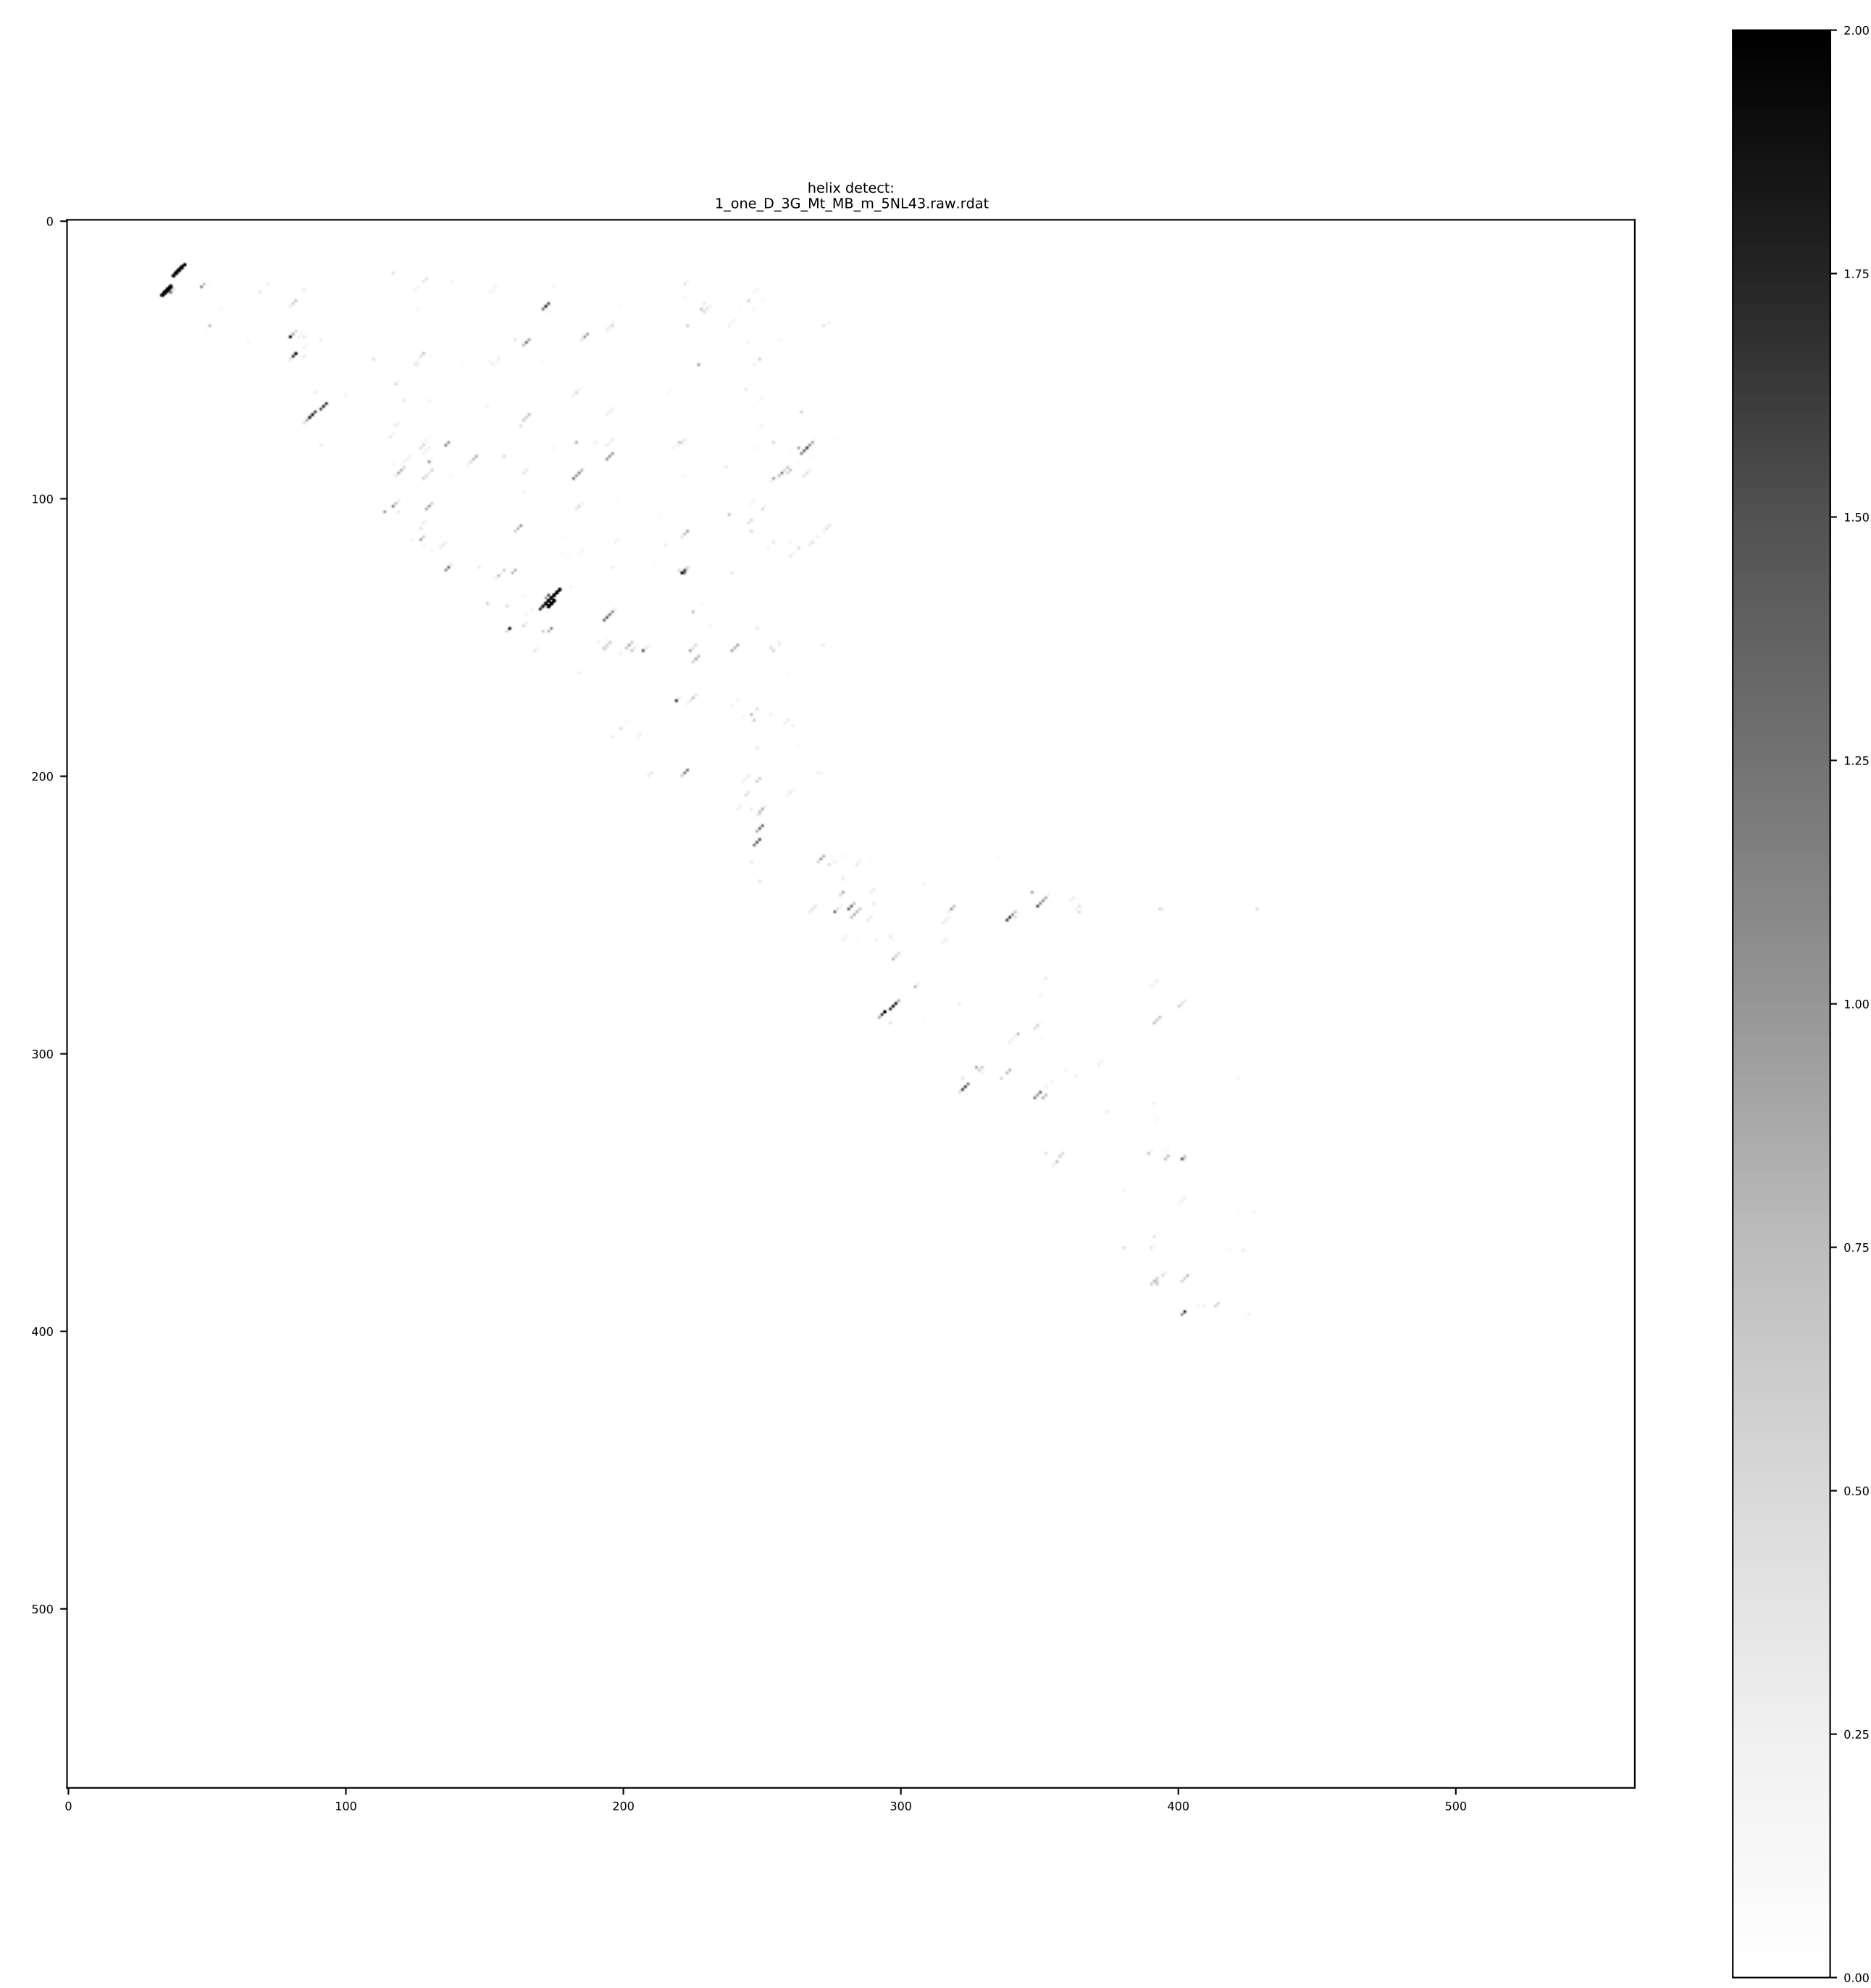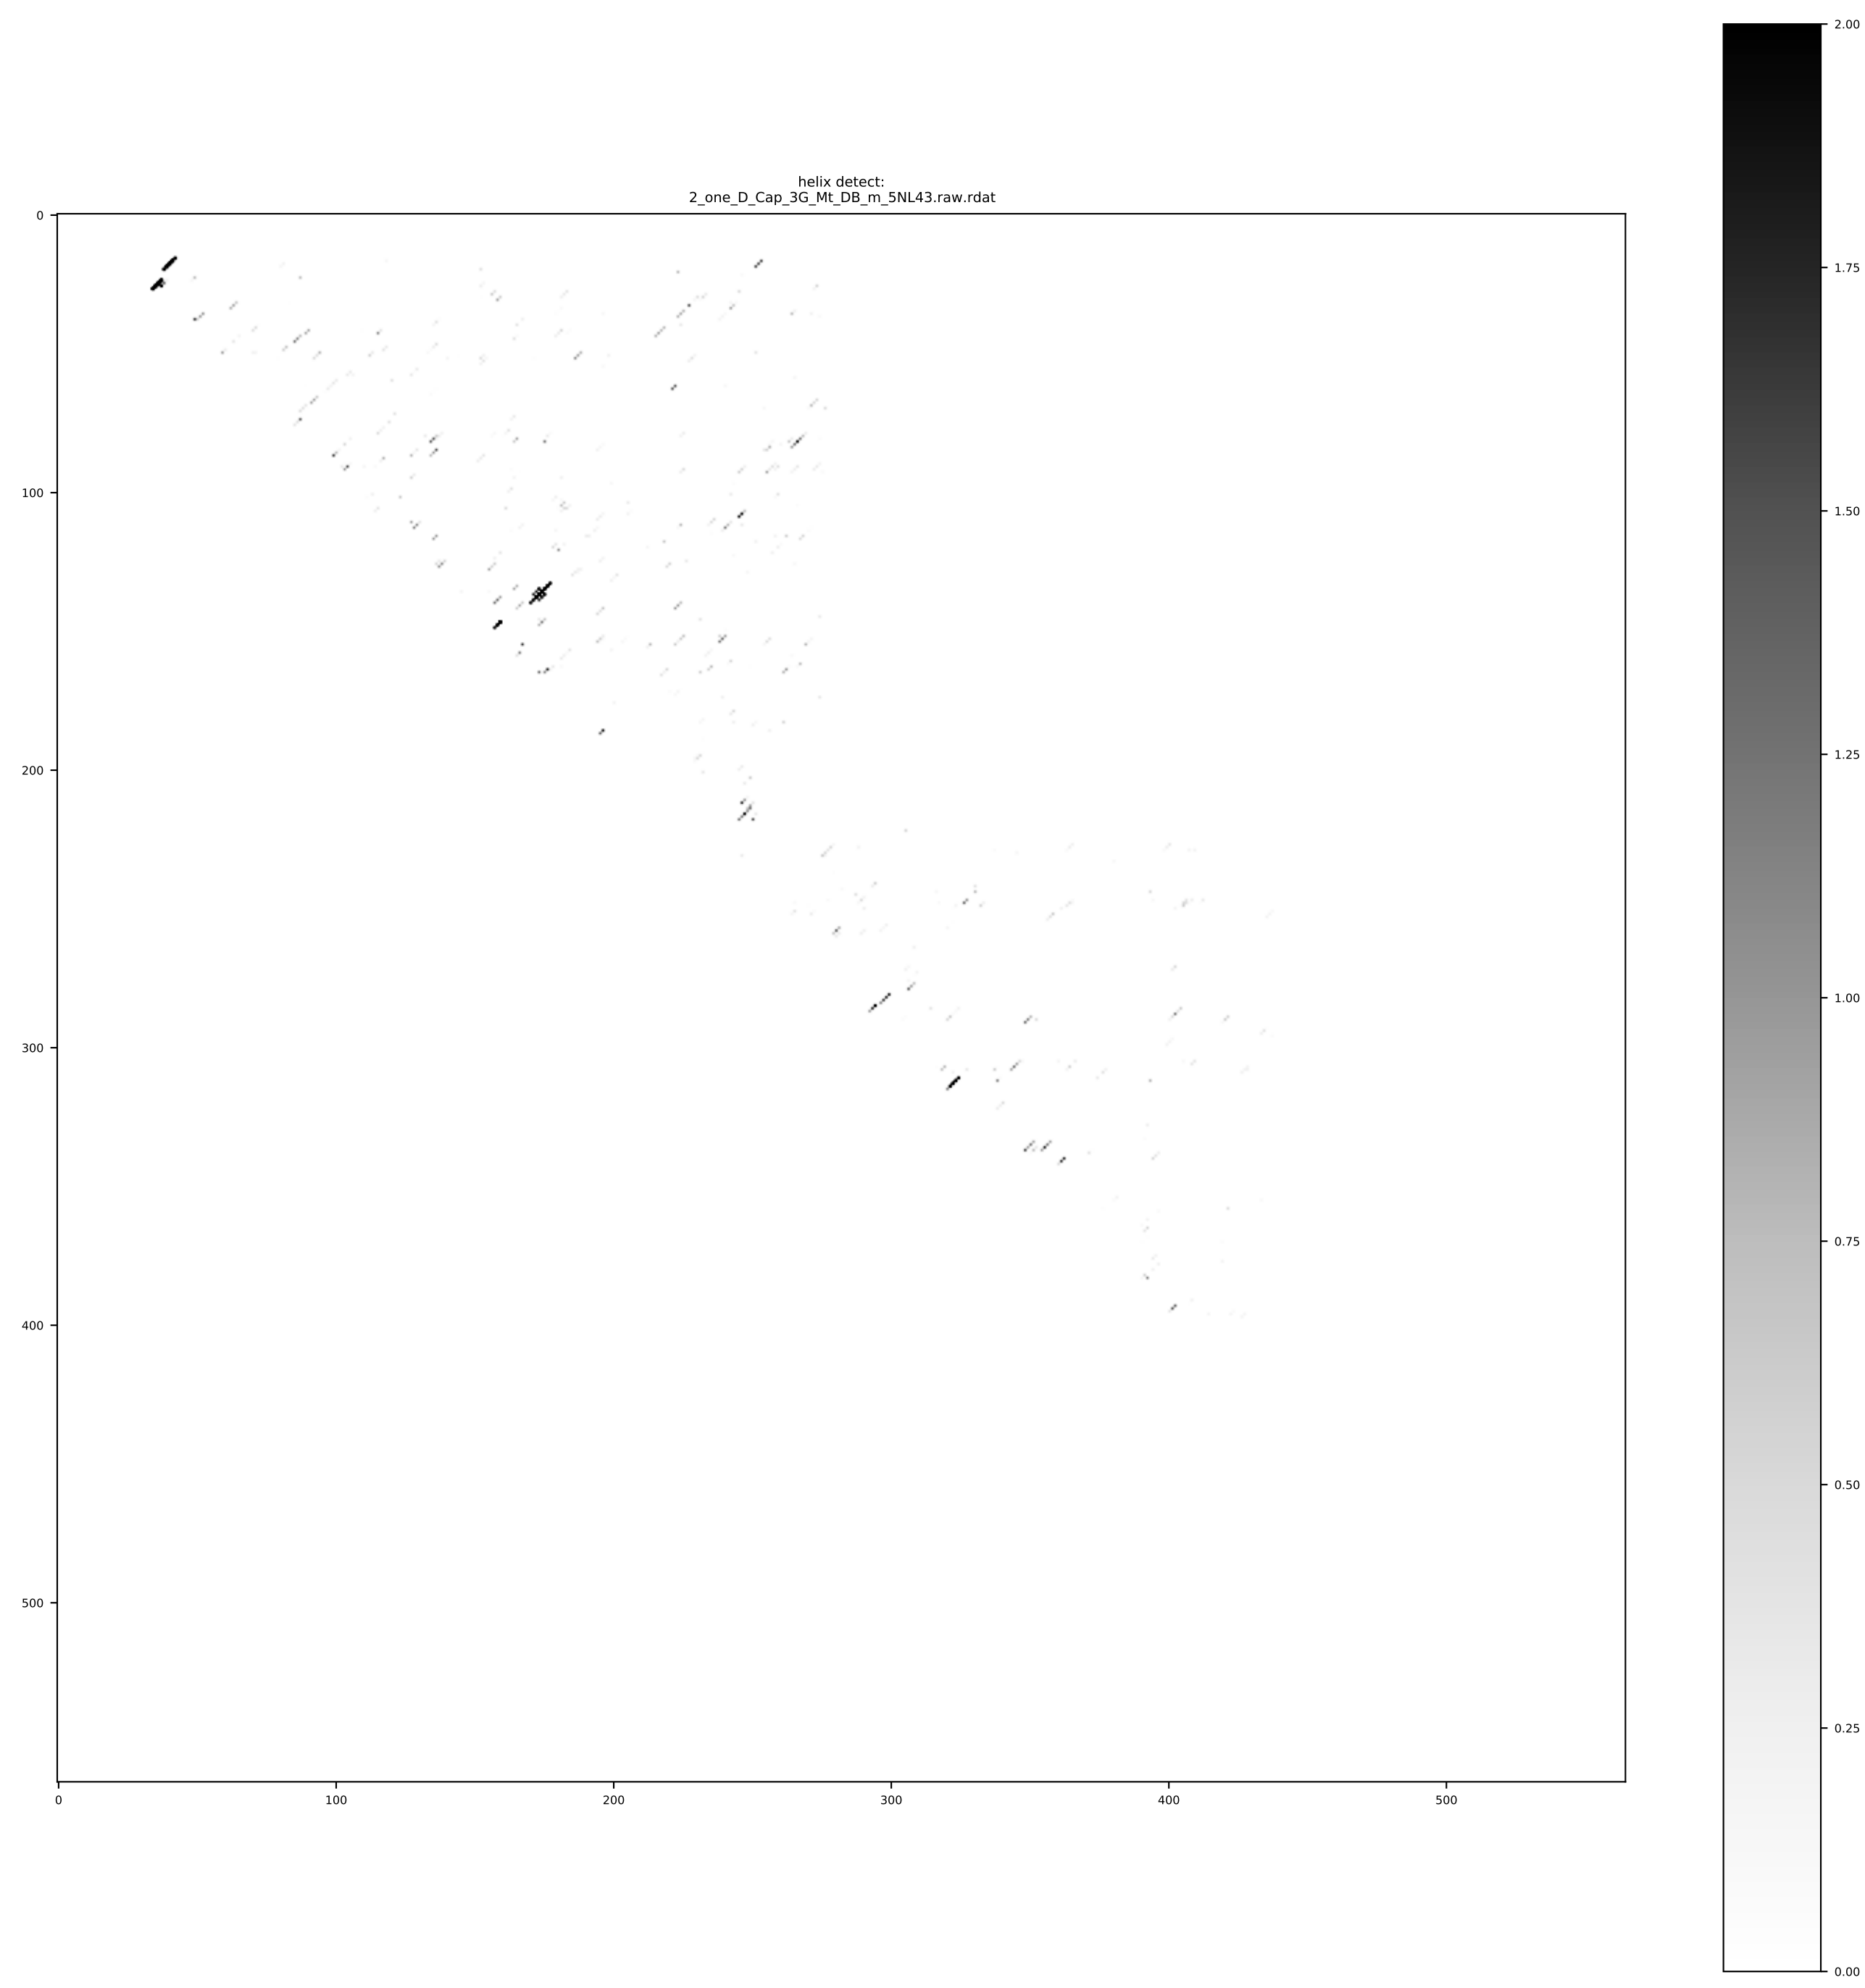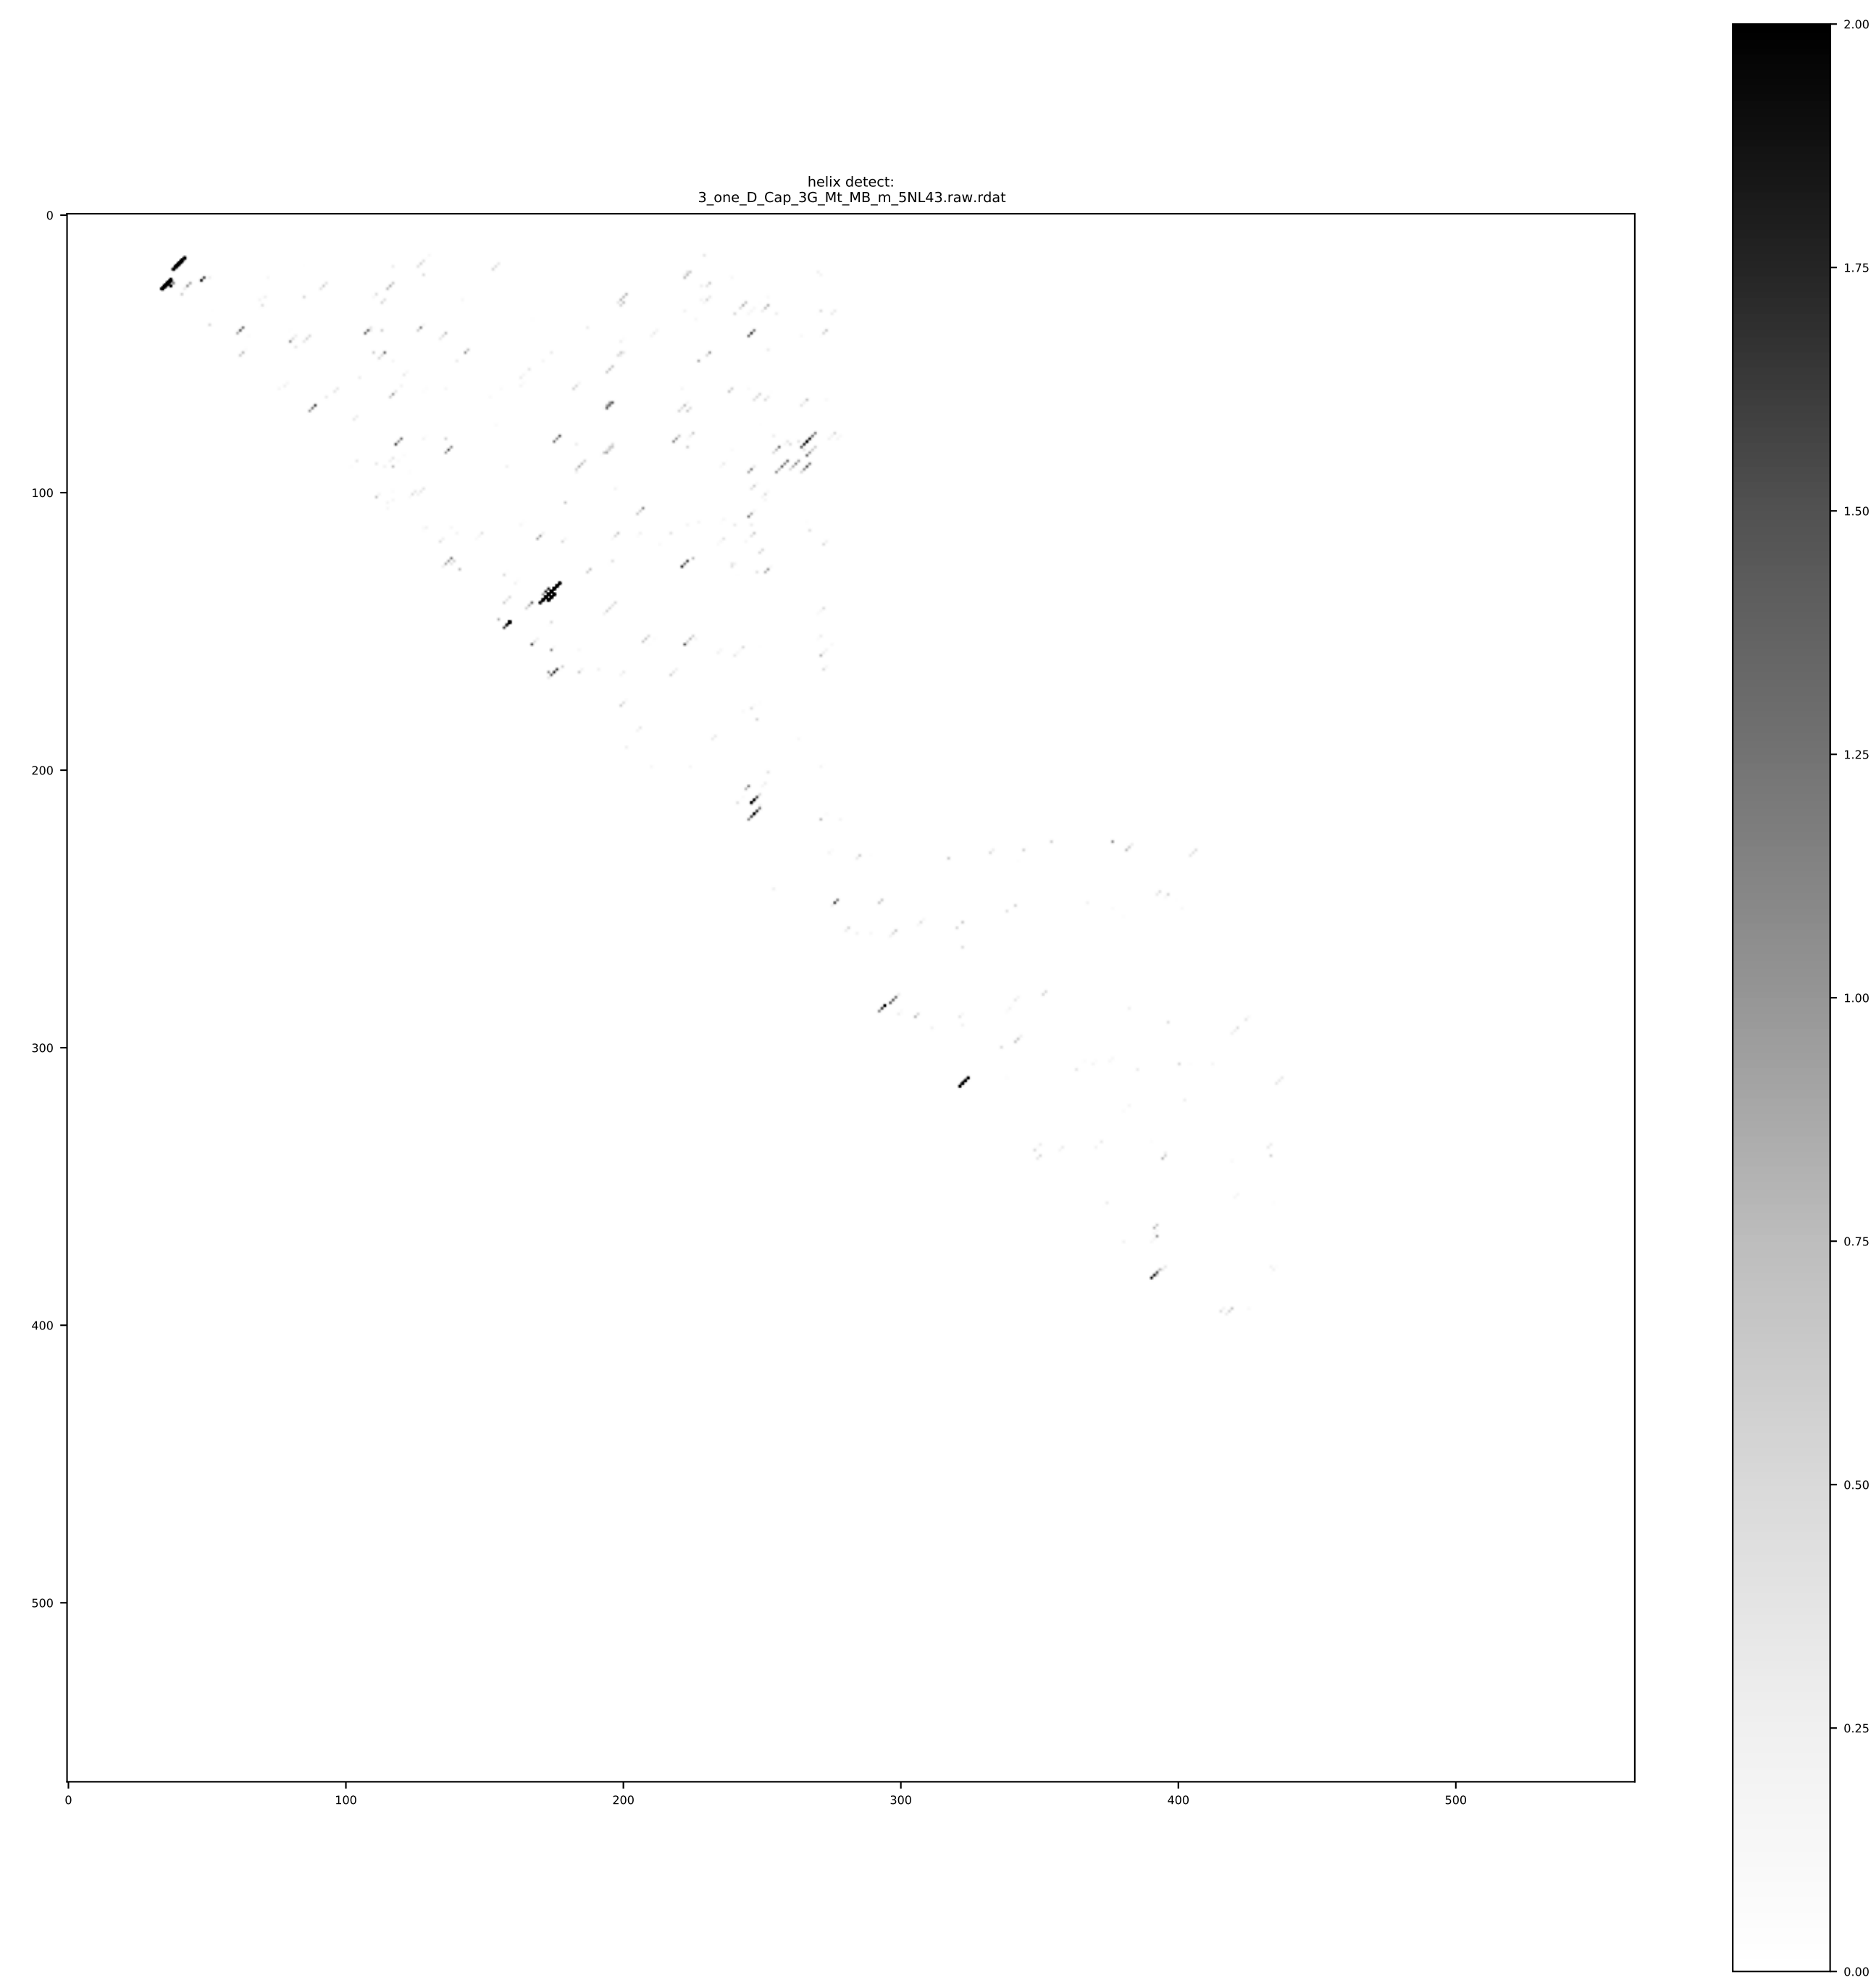

Supplement: Supplementary file 22 [file threeG_monomer_detected_helix.pdf › 2d-structure-inference/detected_helix/threeG_monomer_detected_helix.pdf]

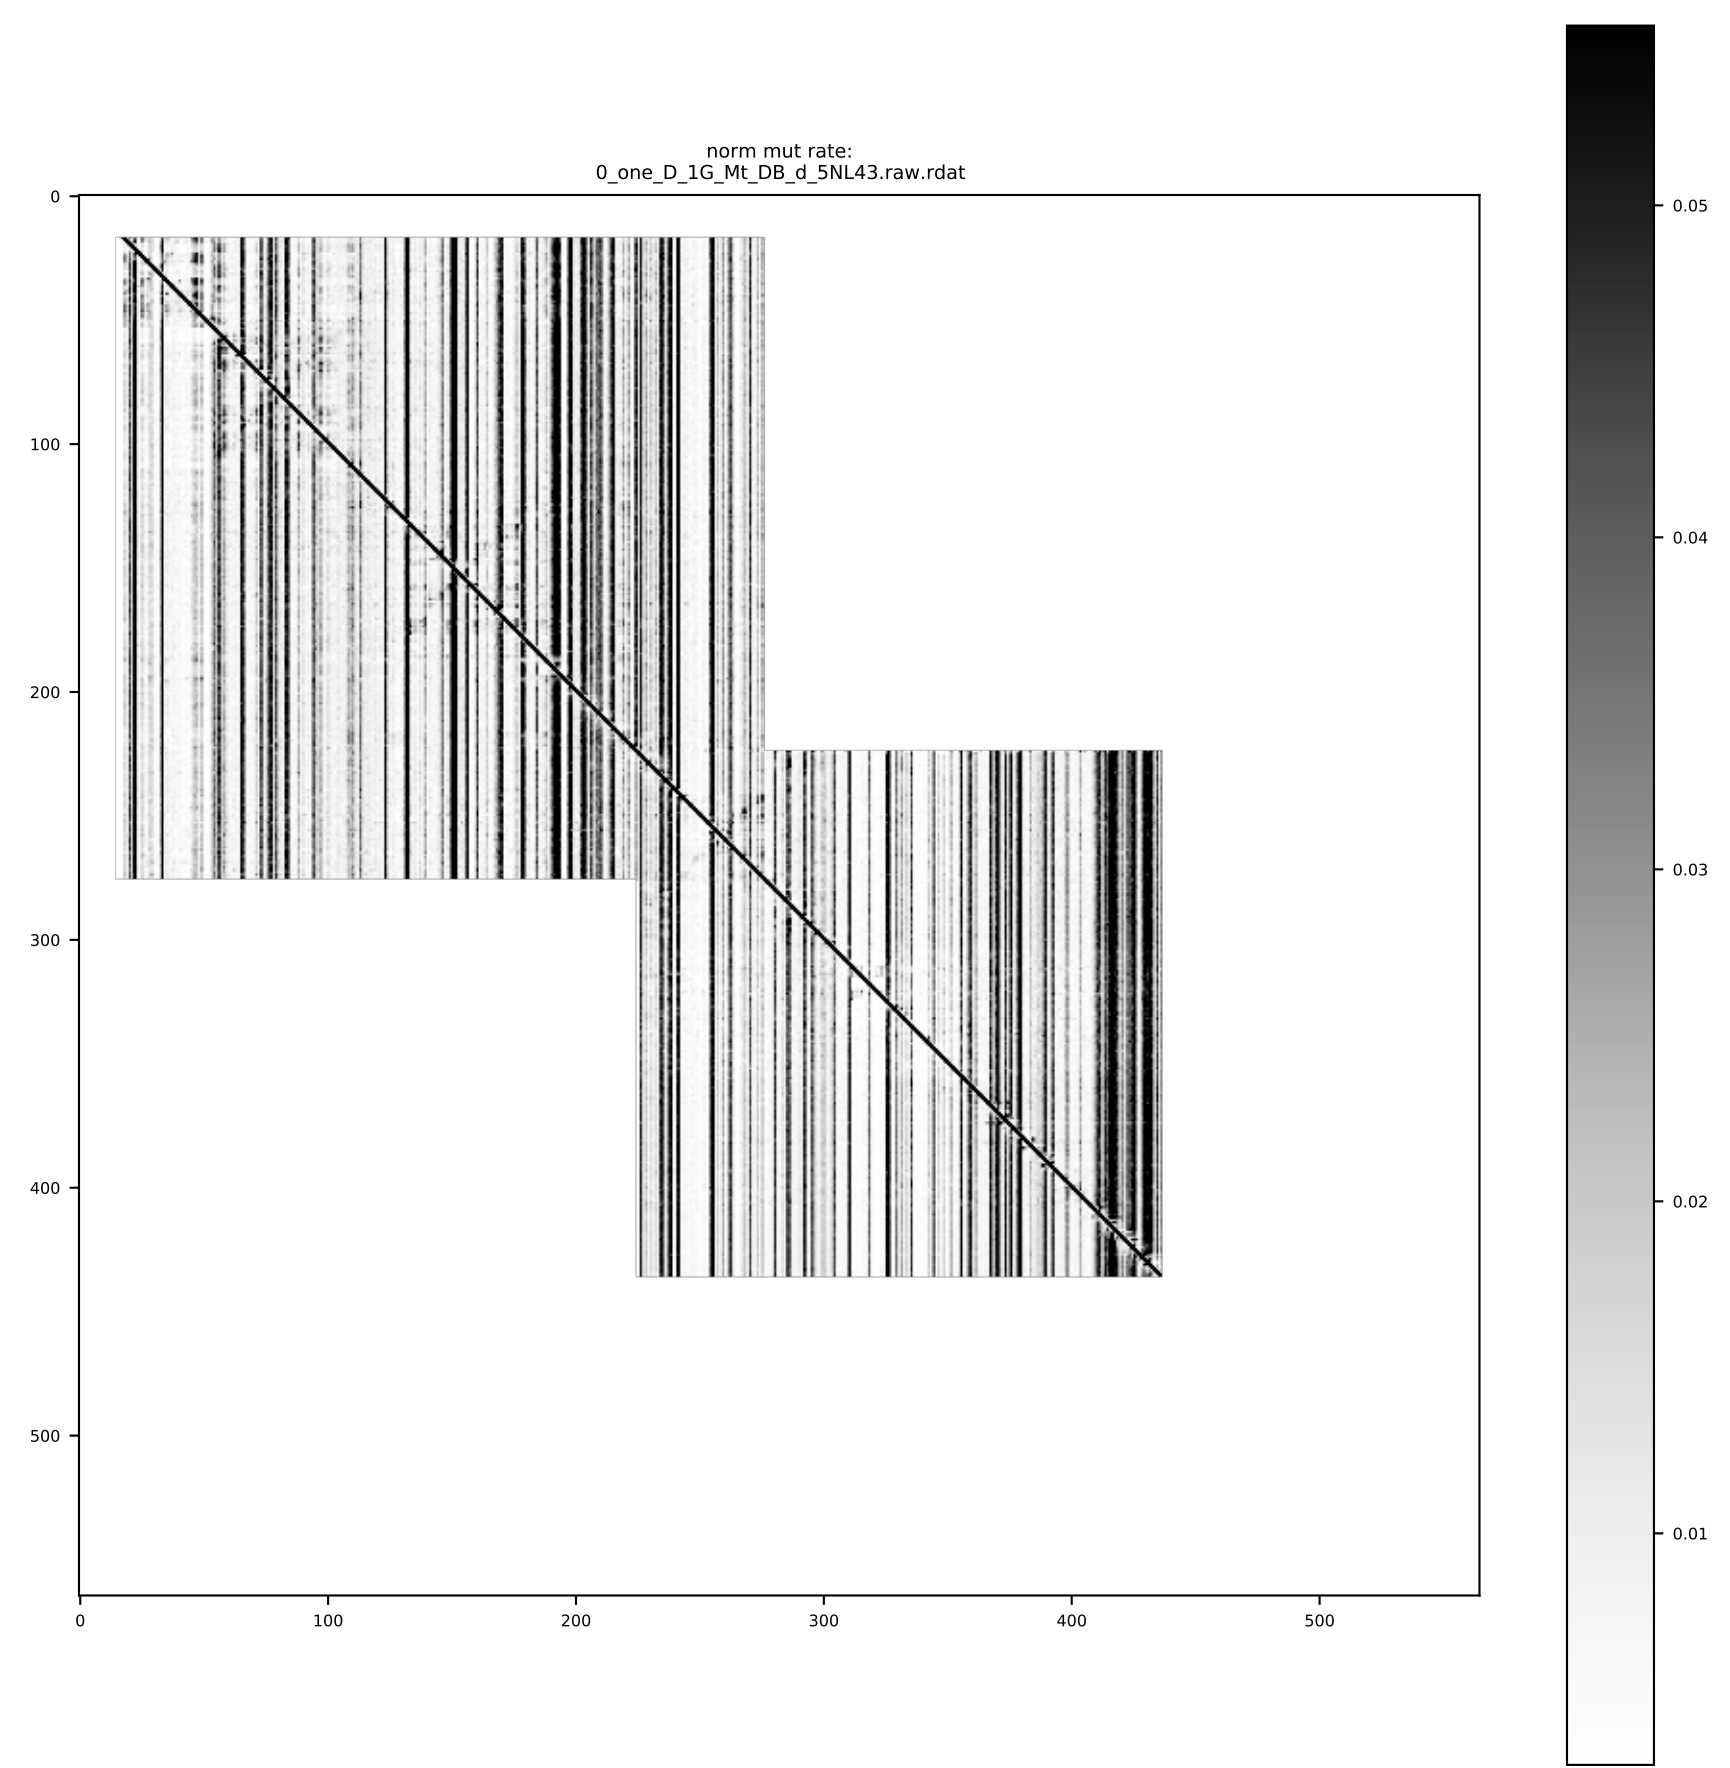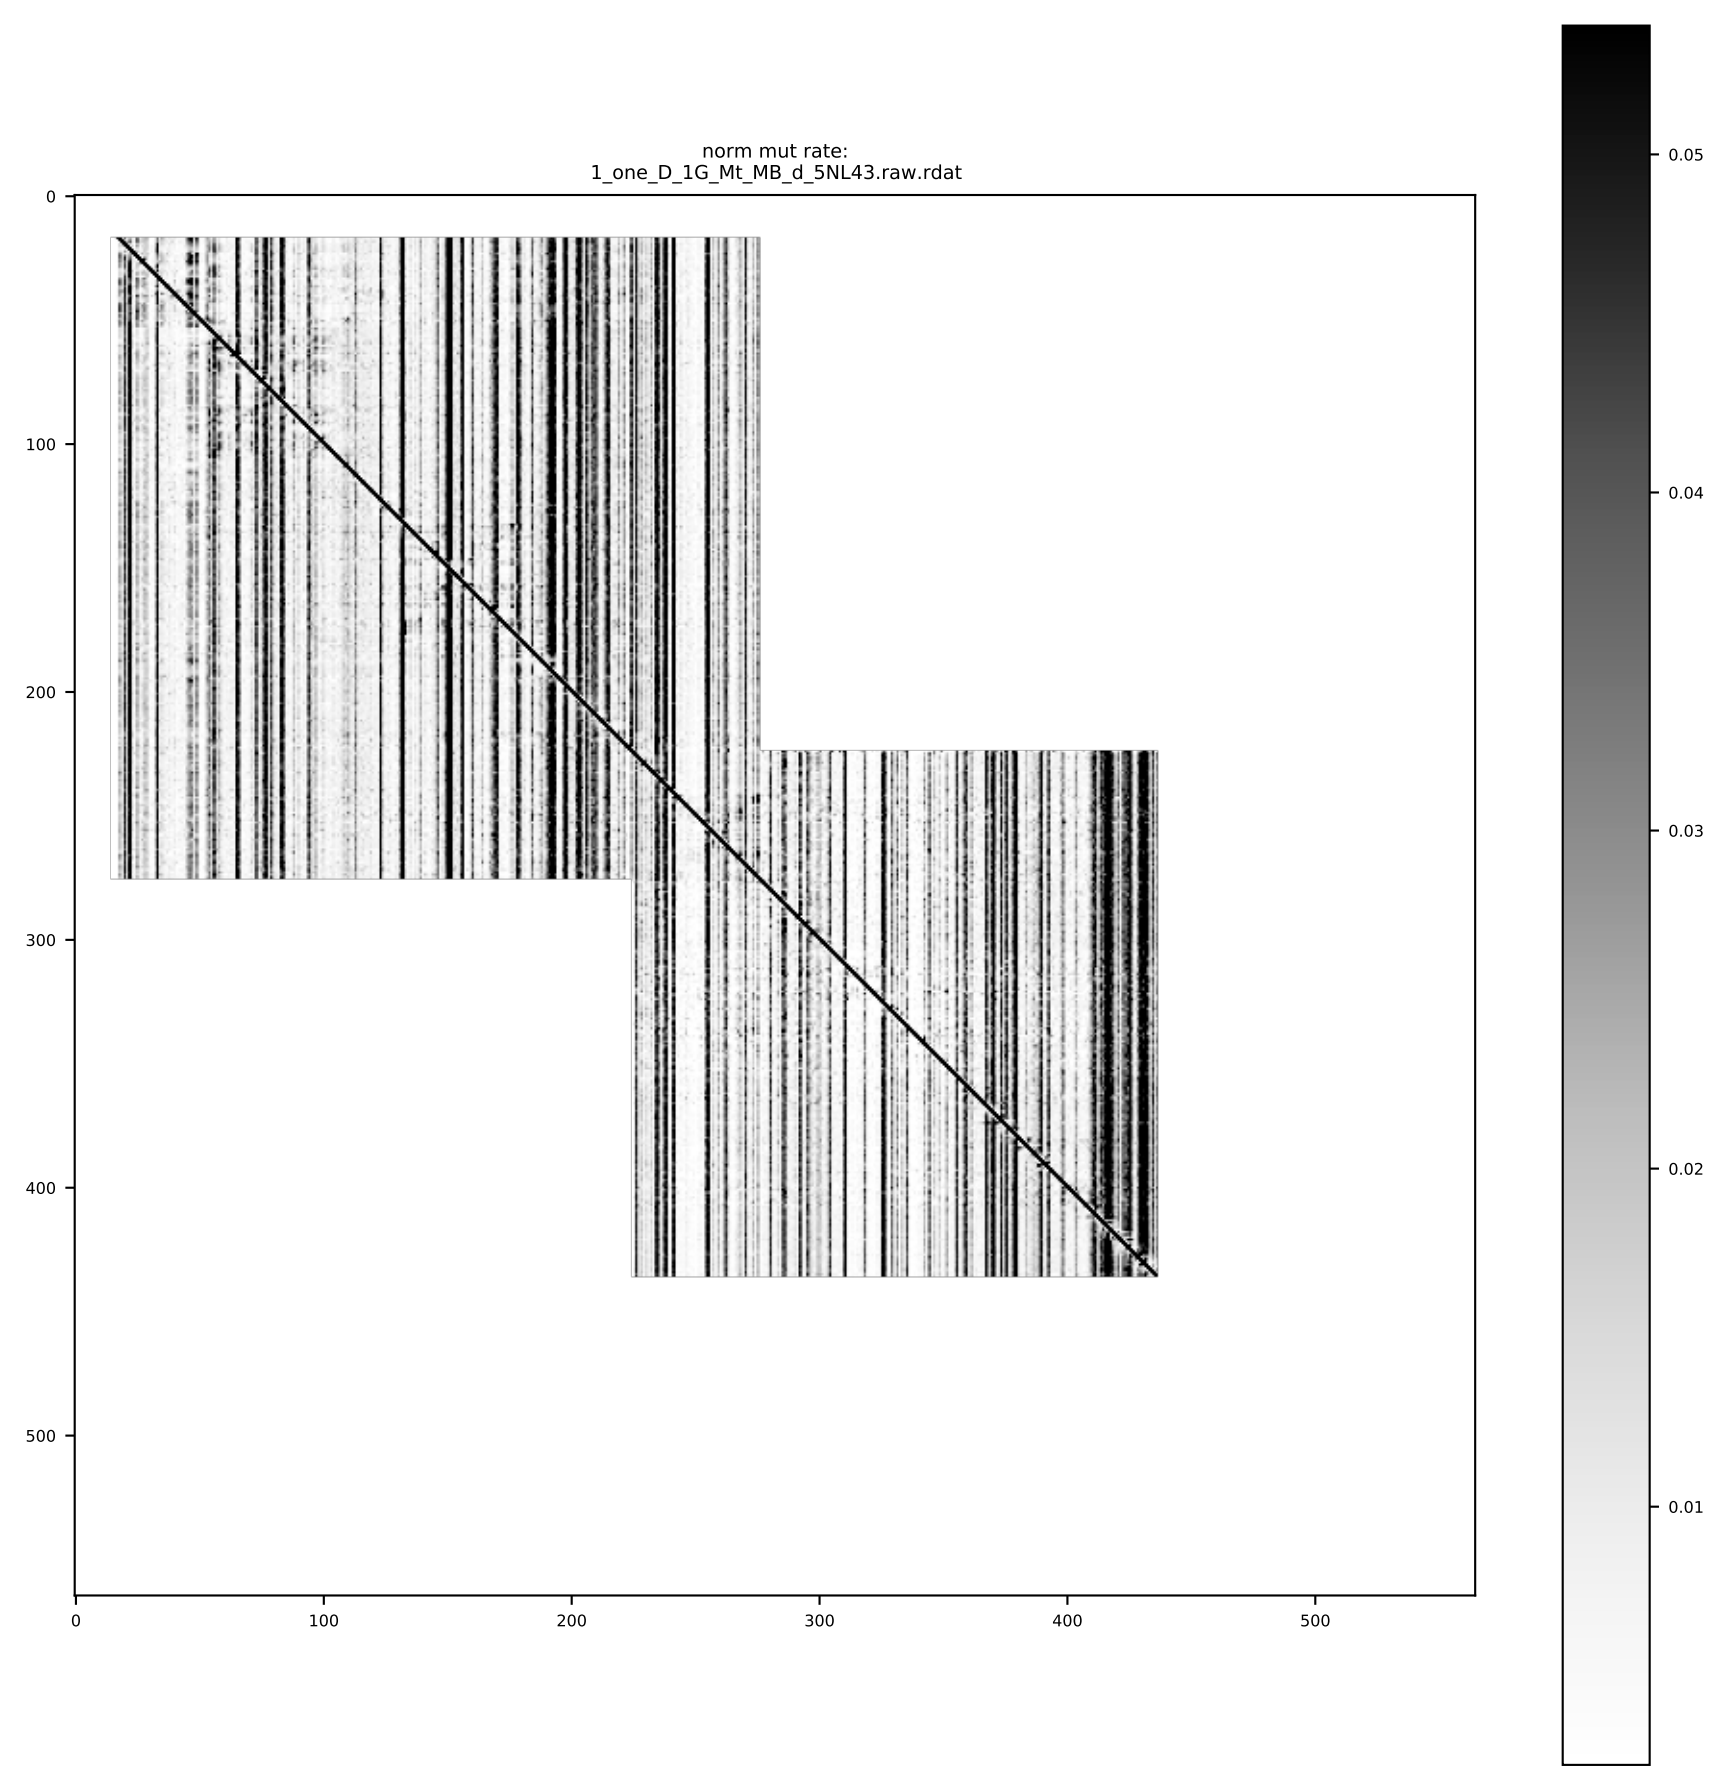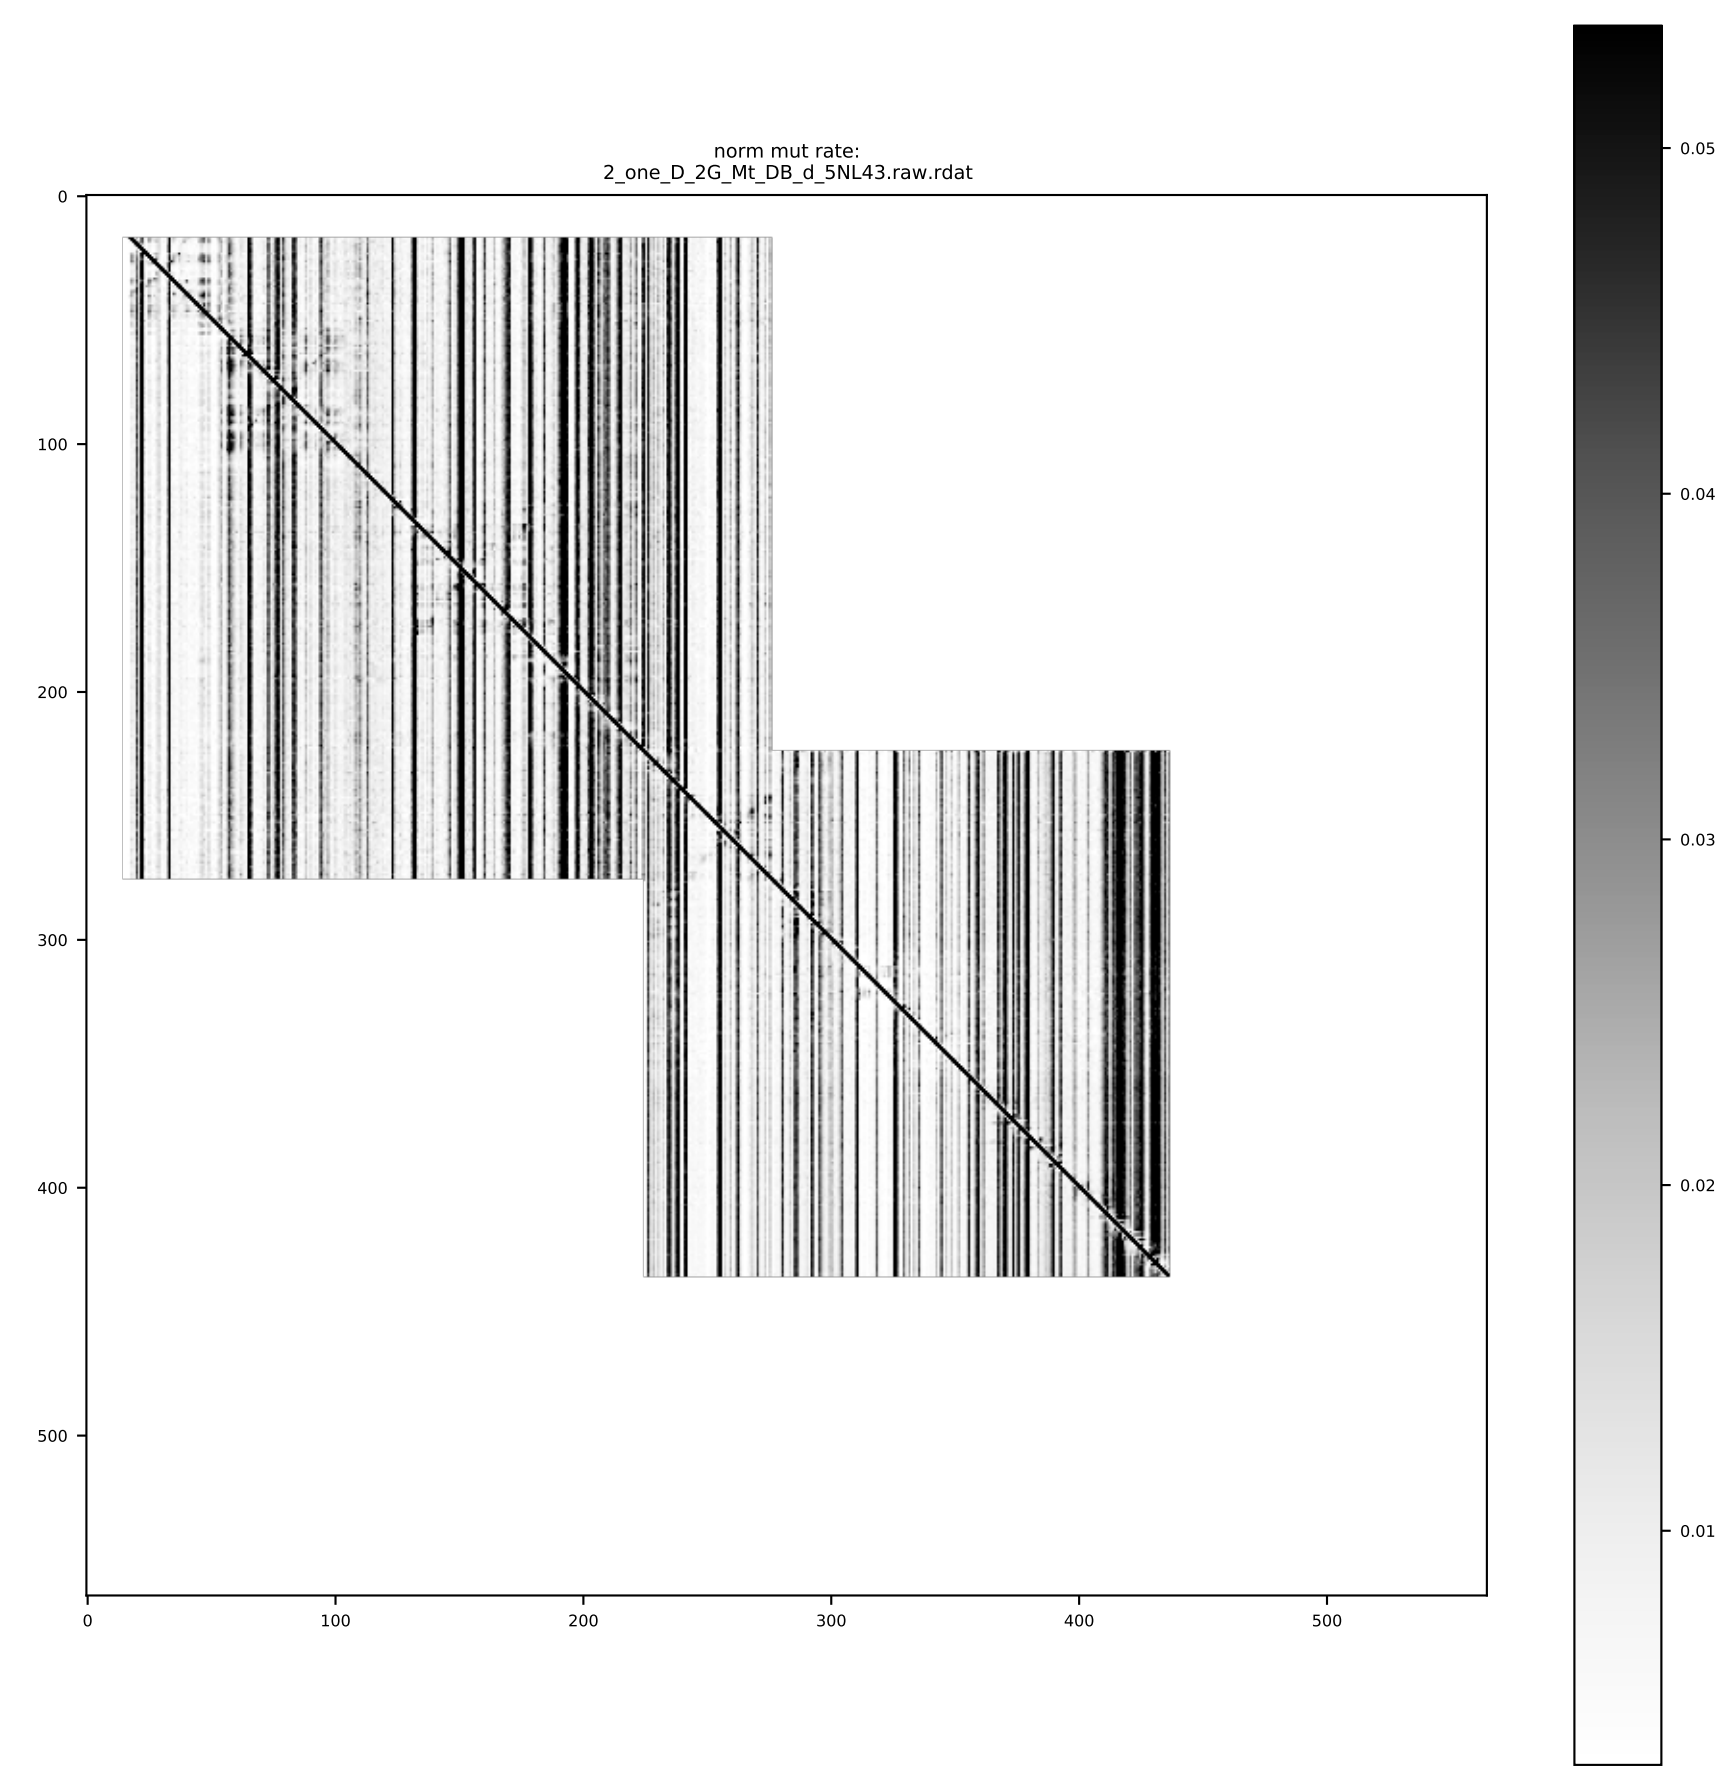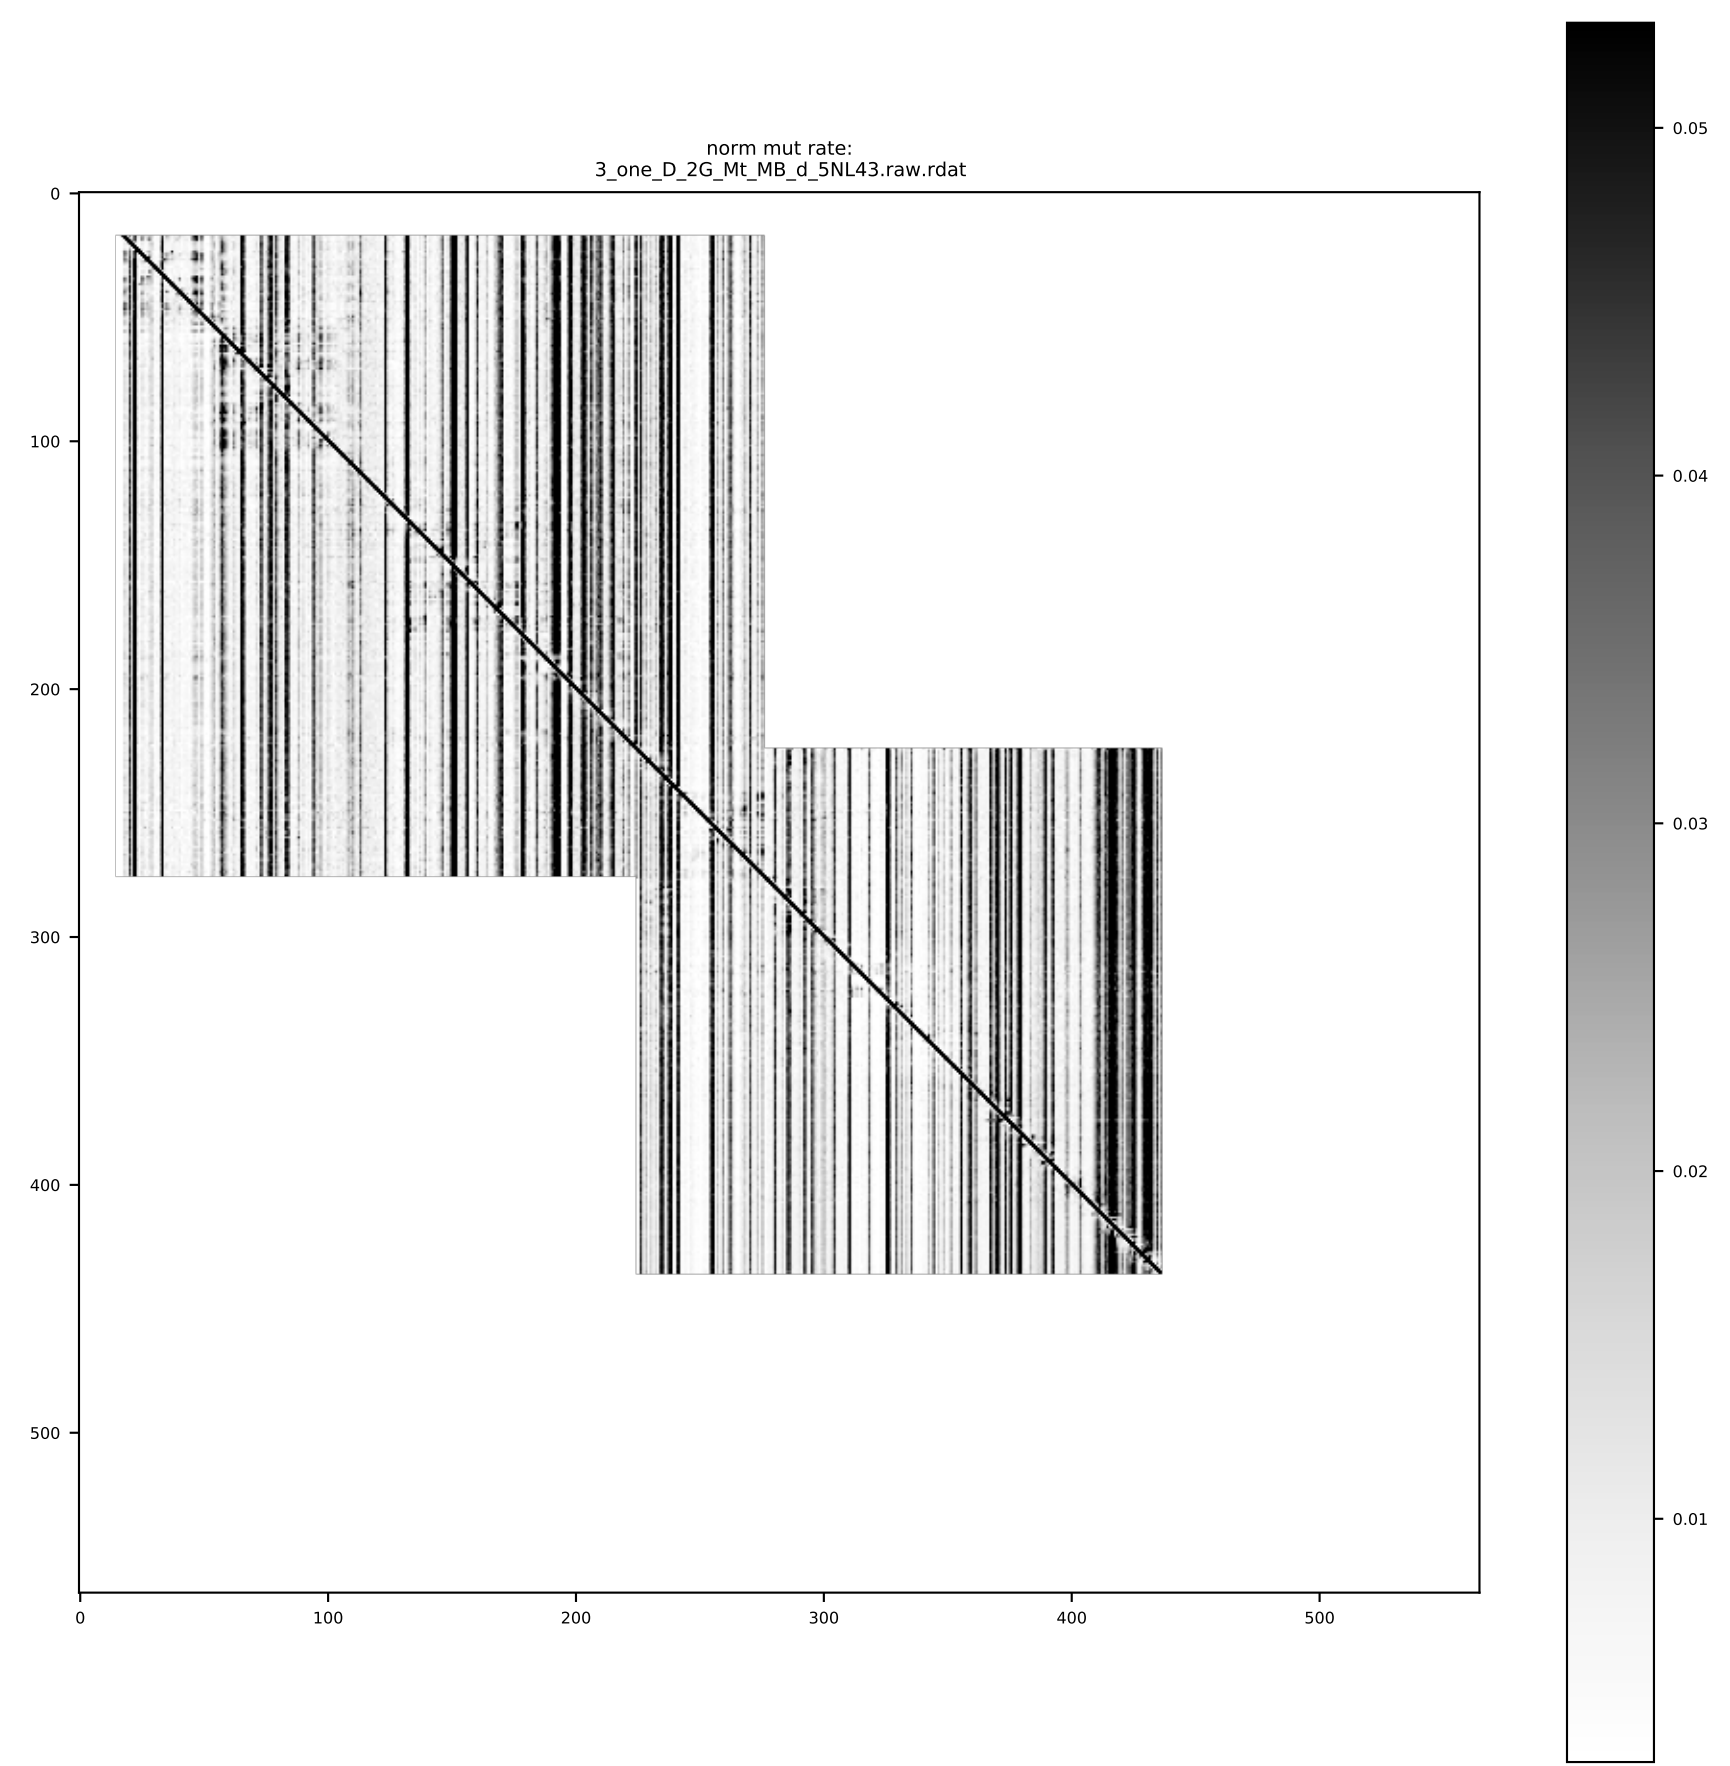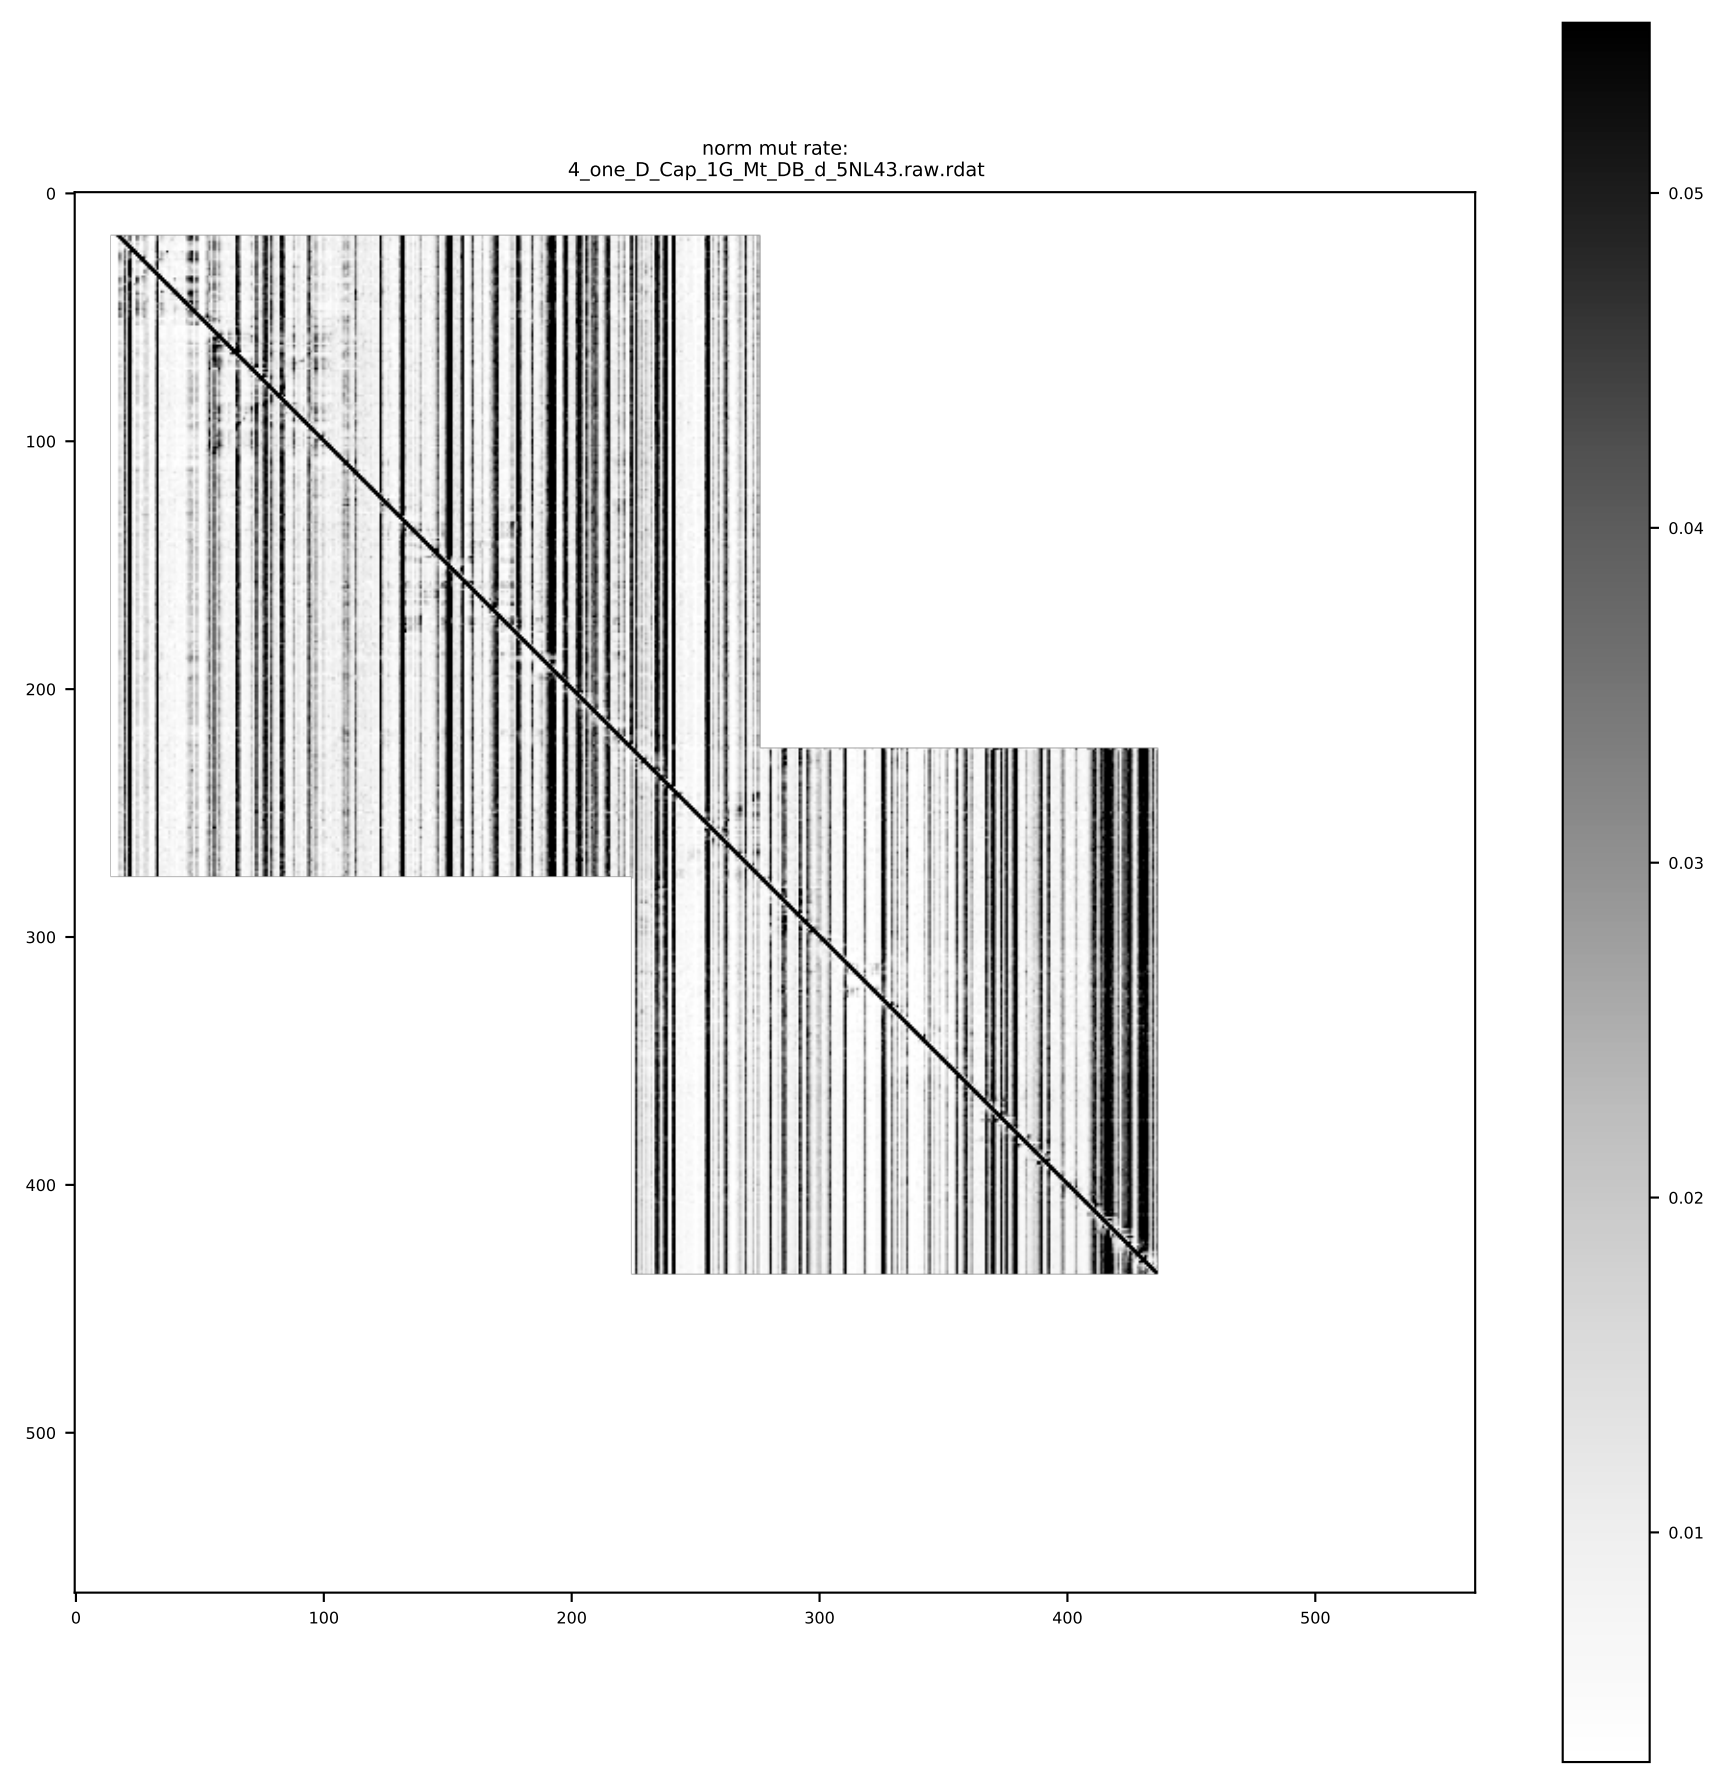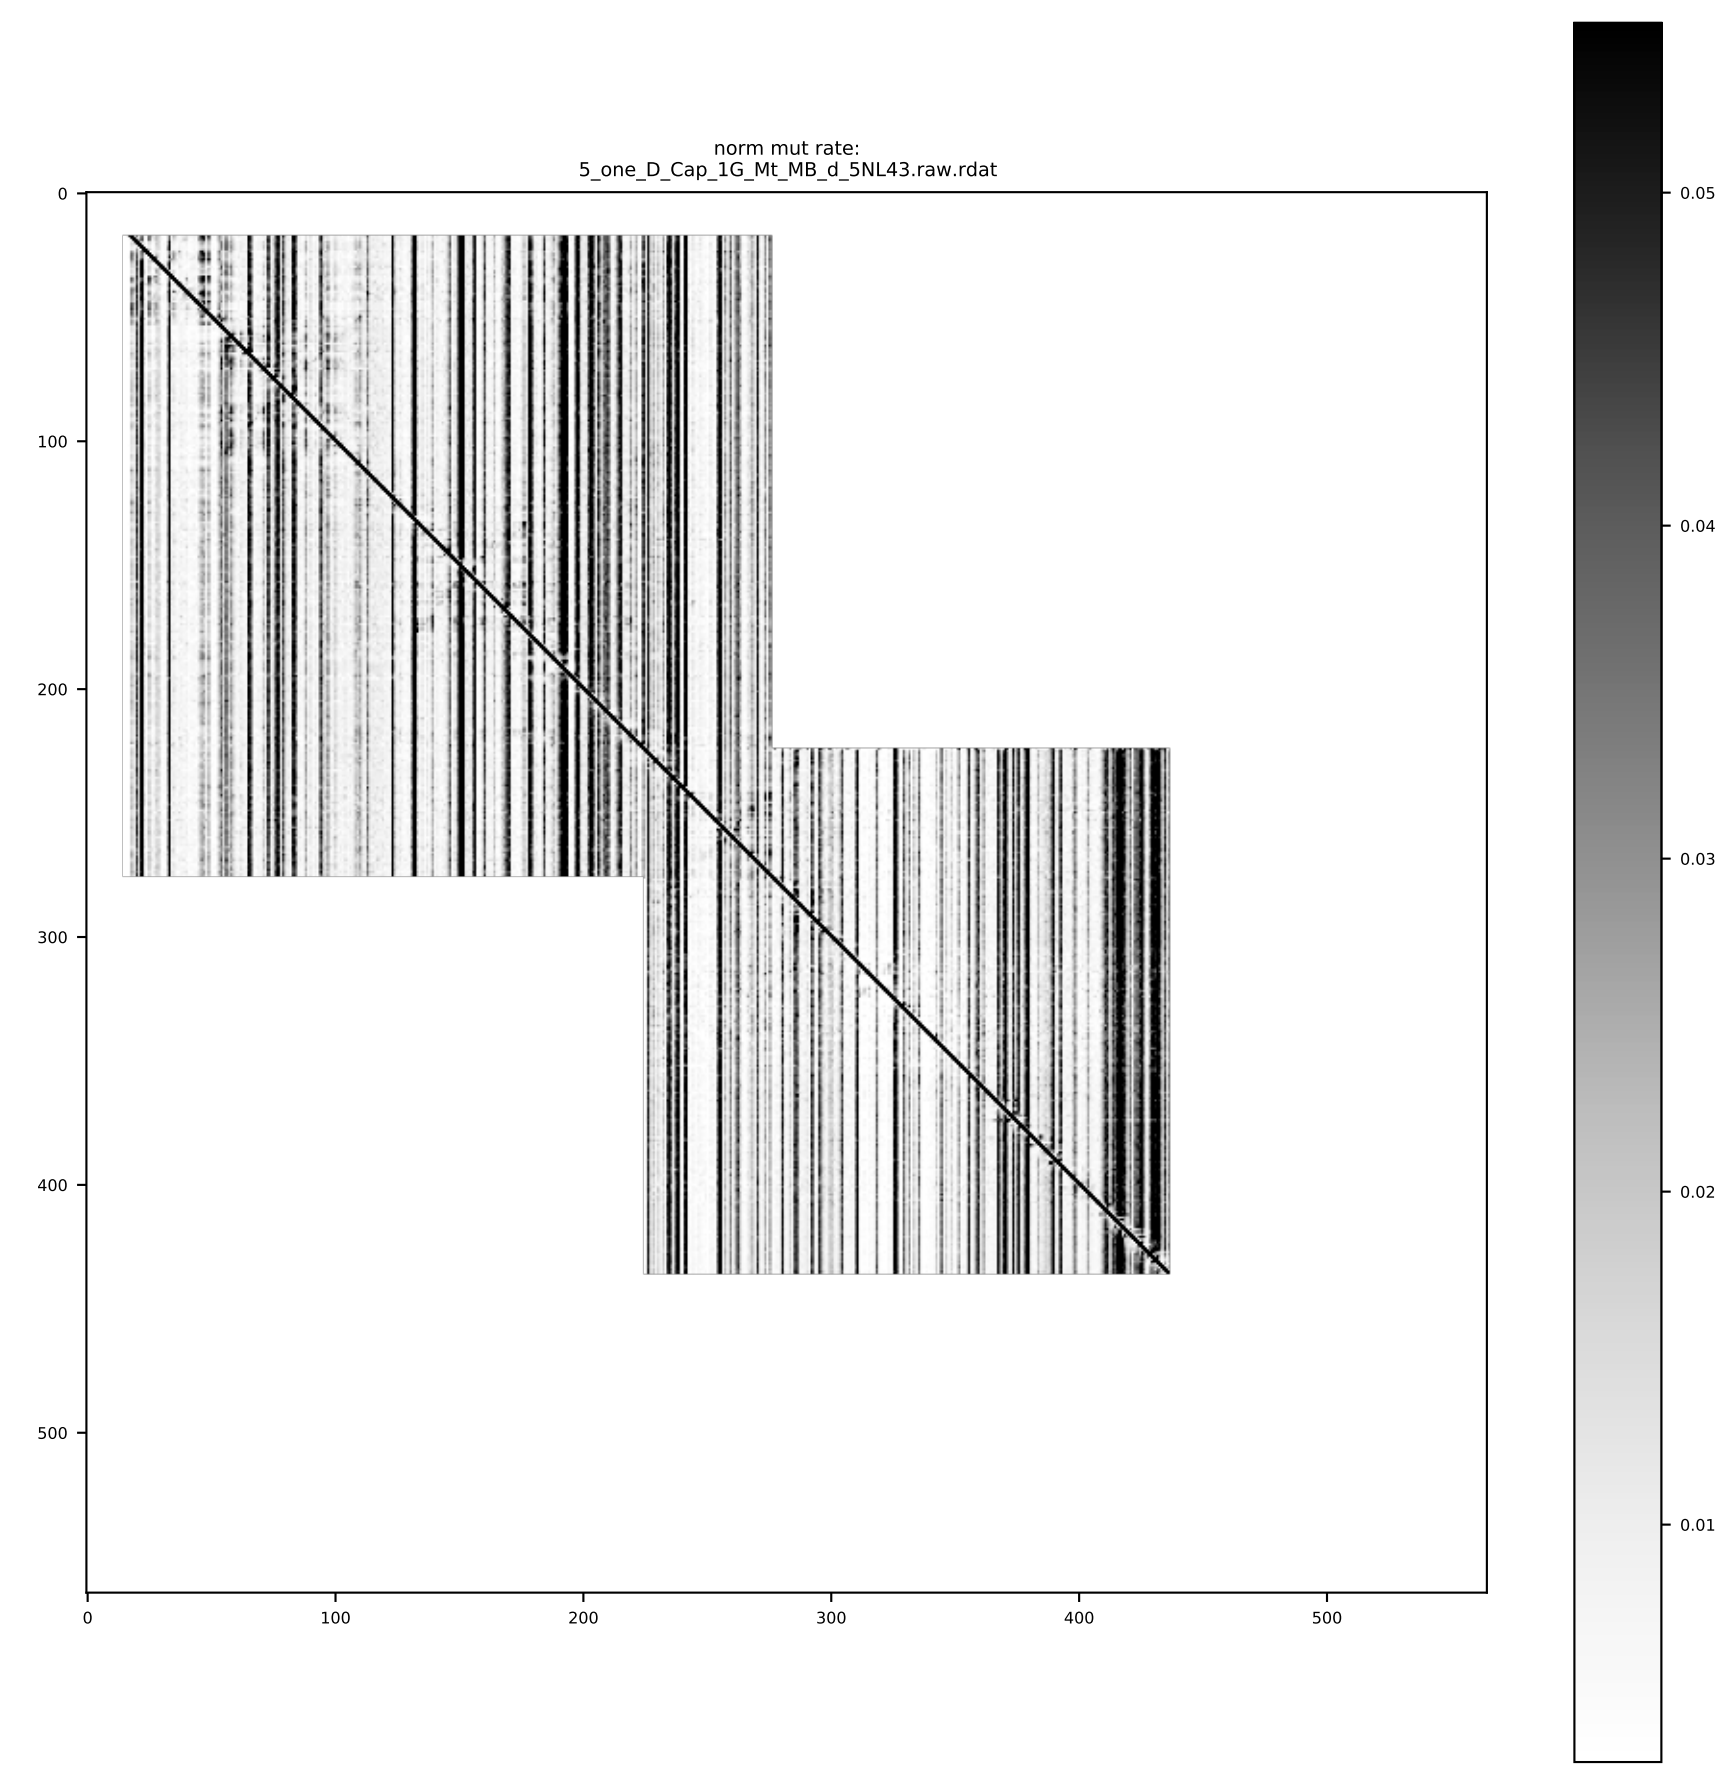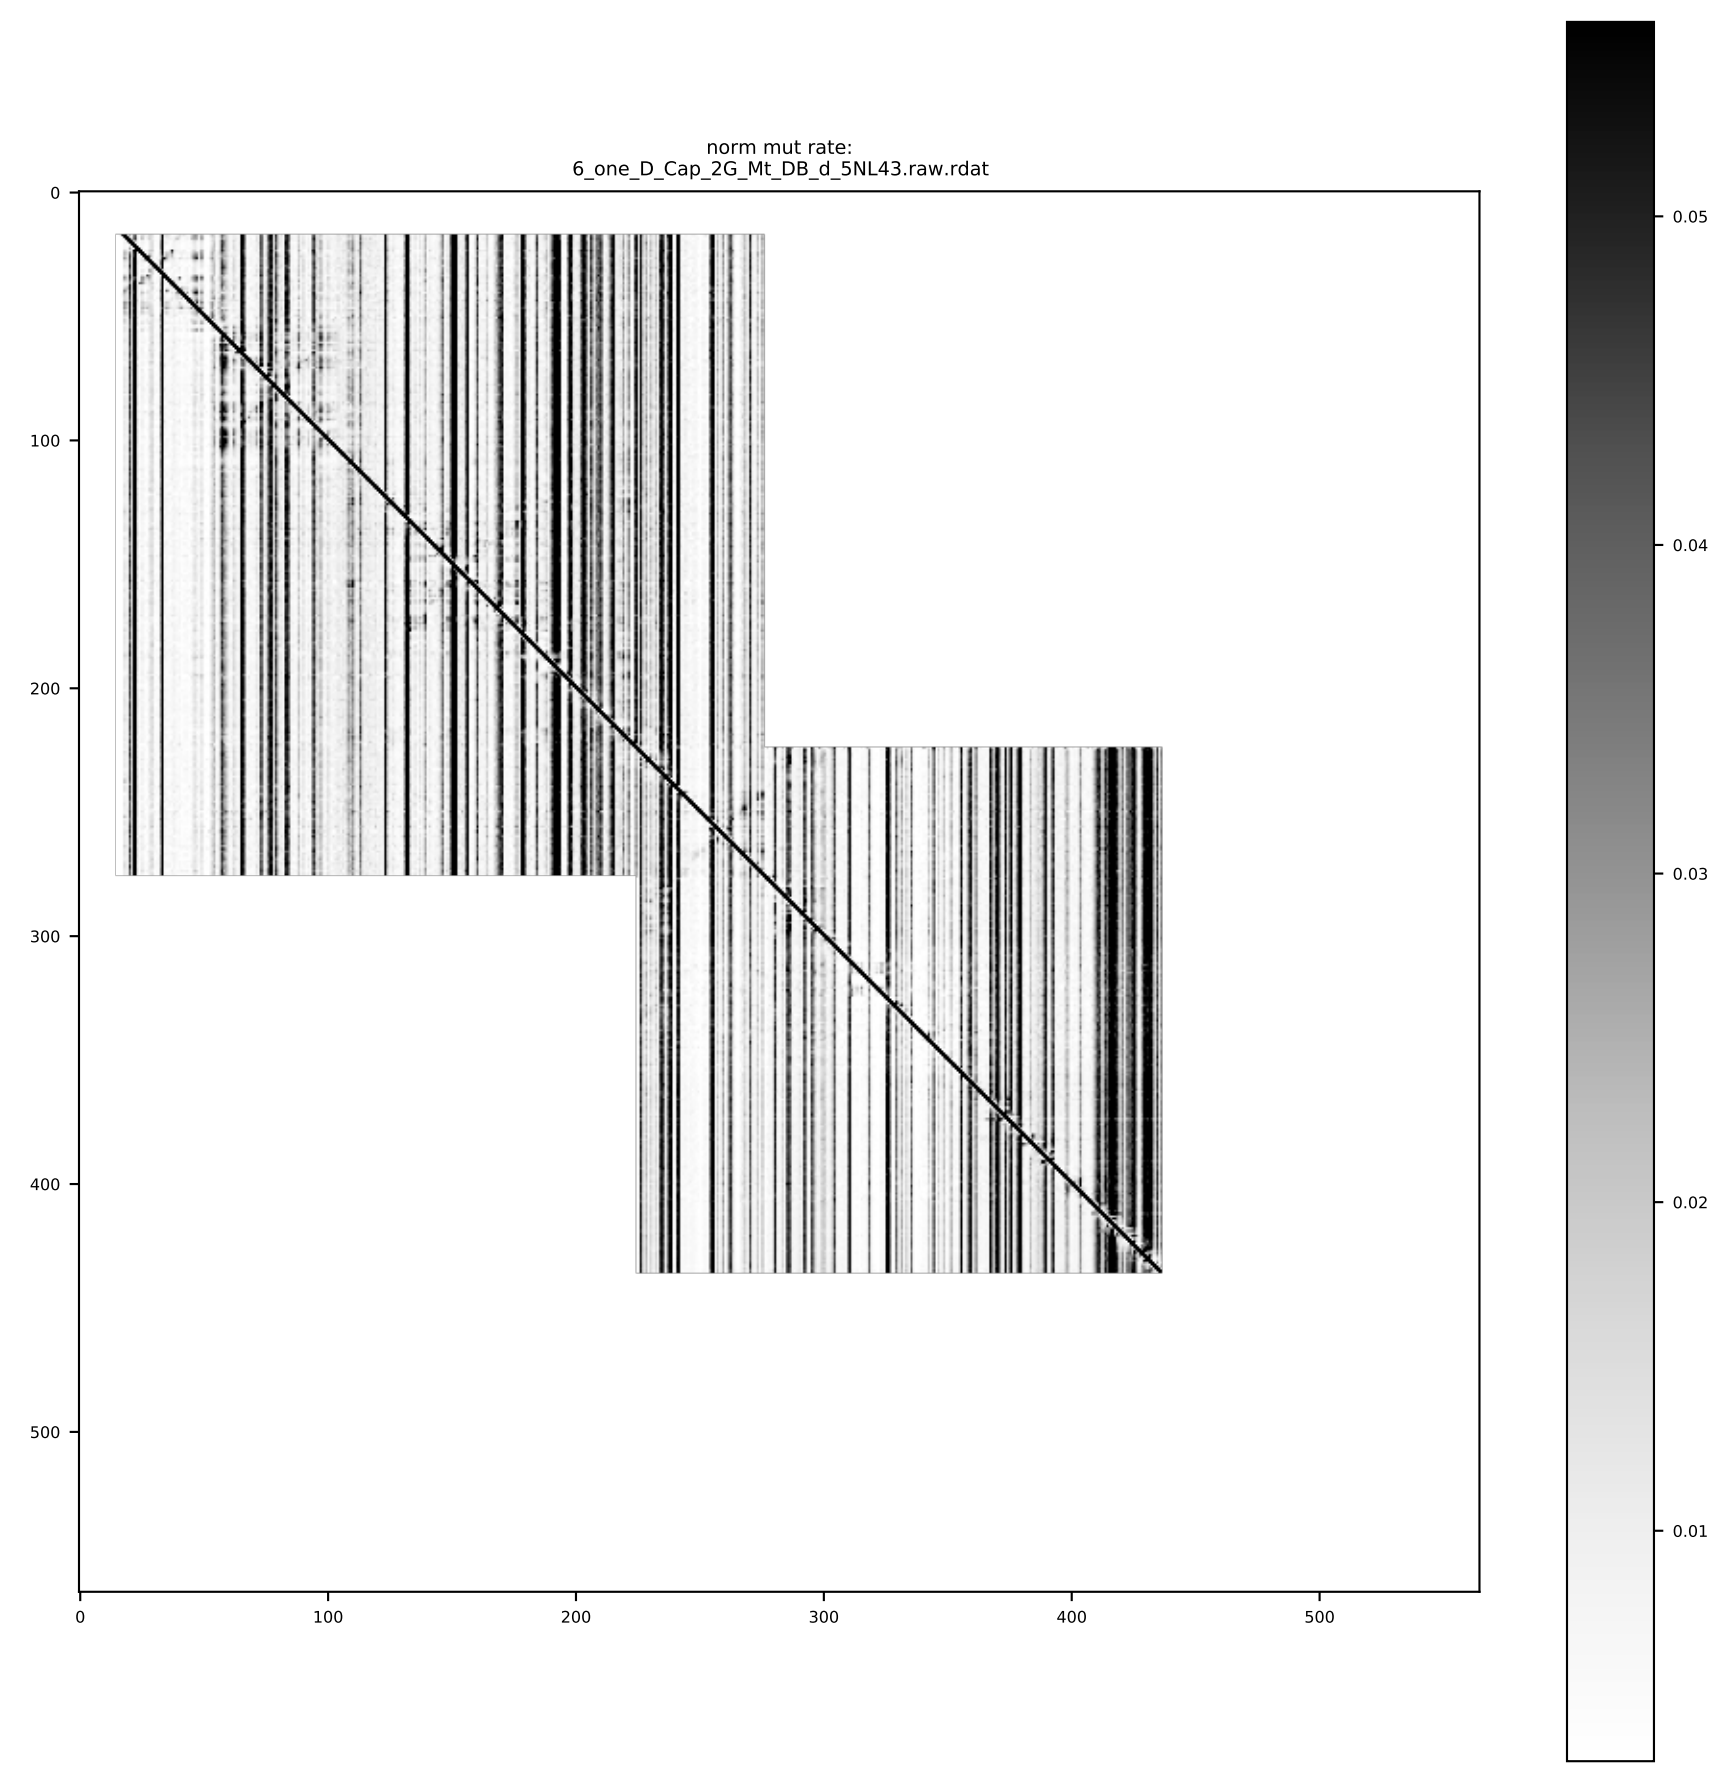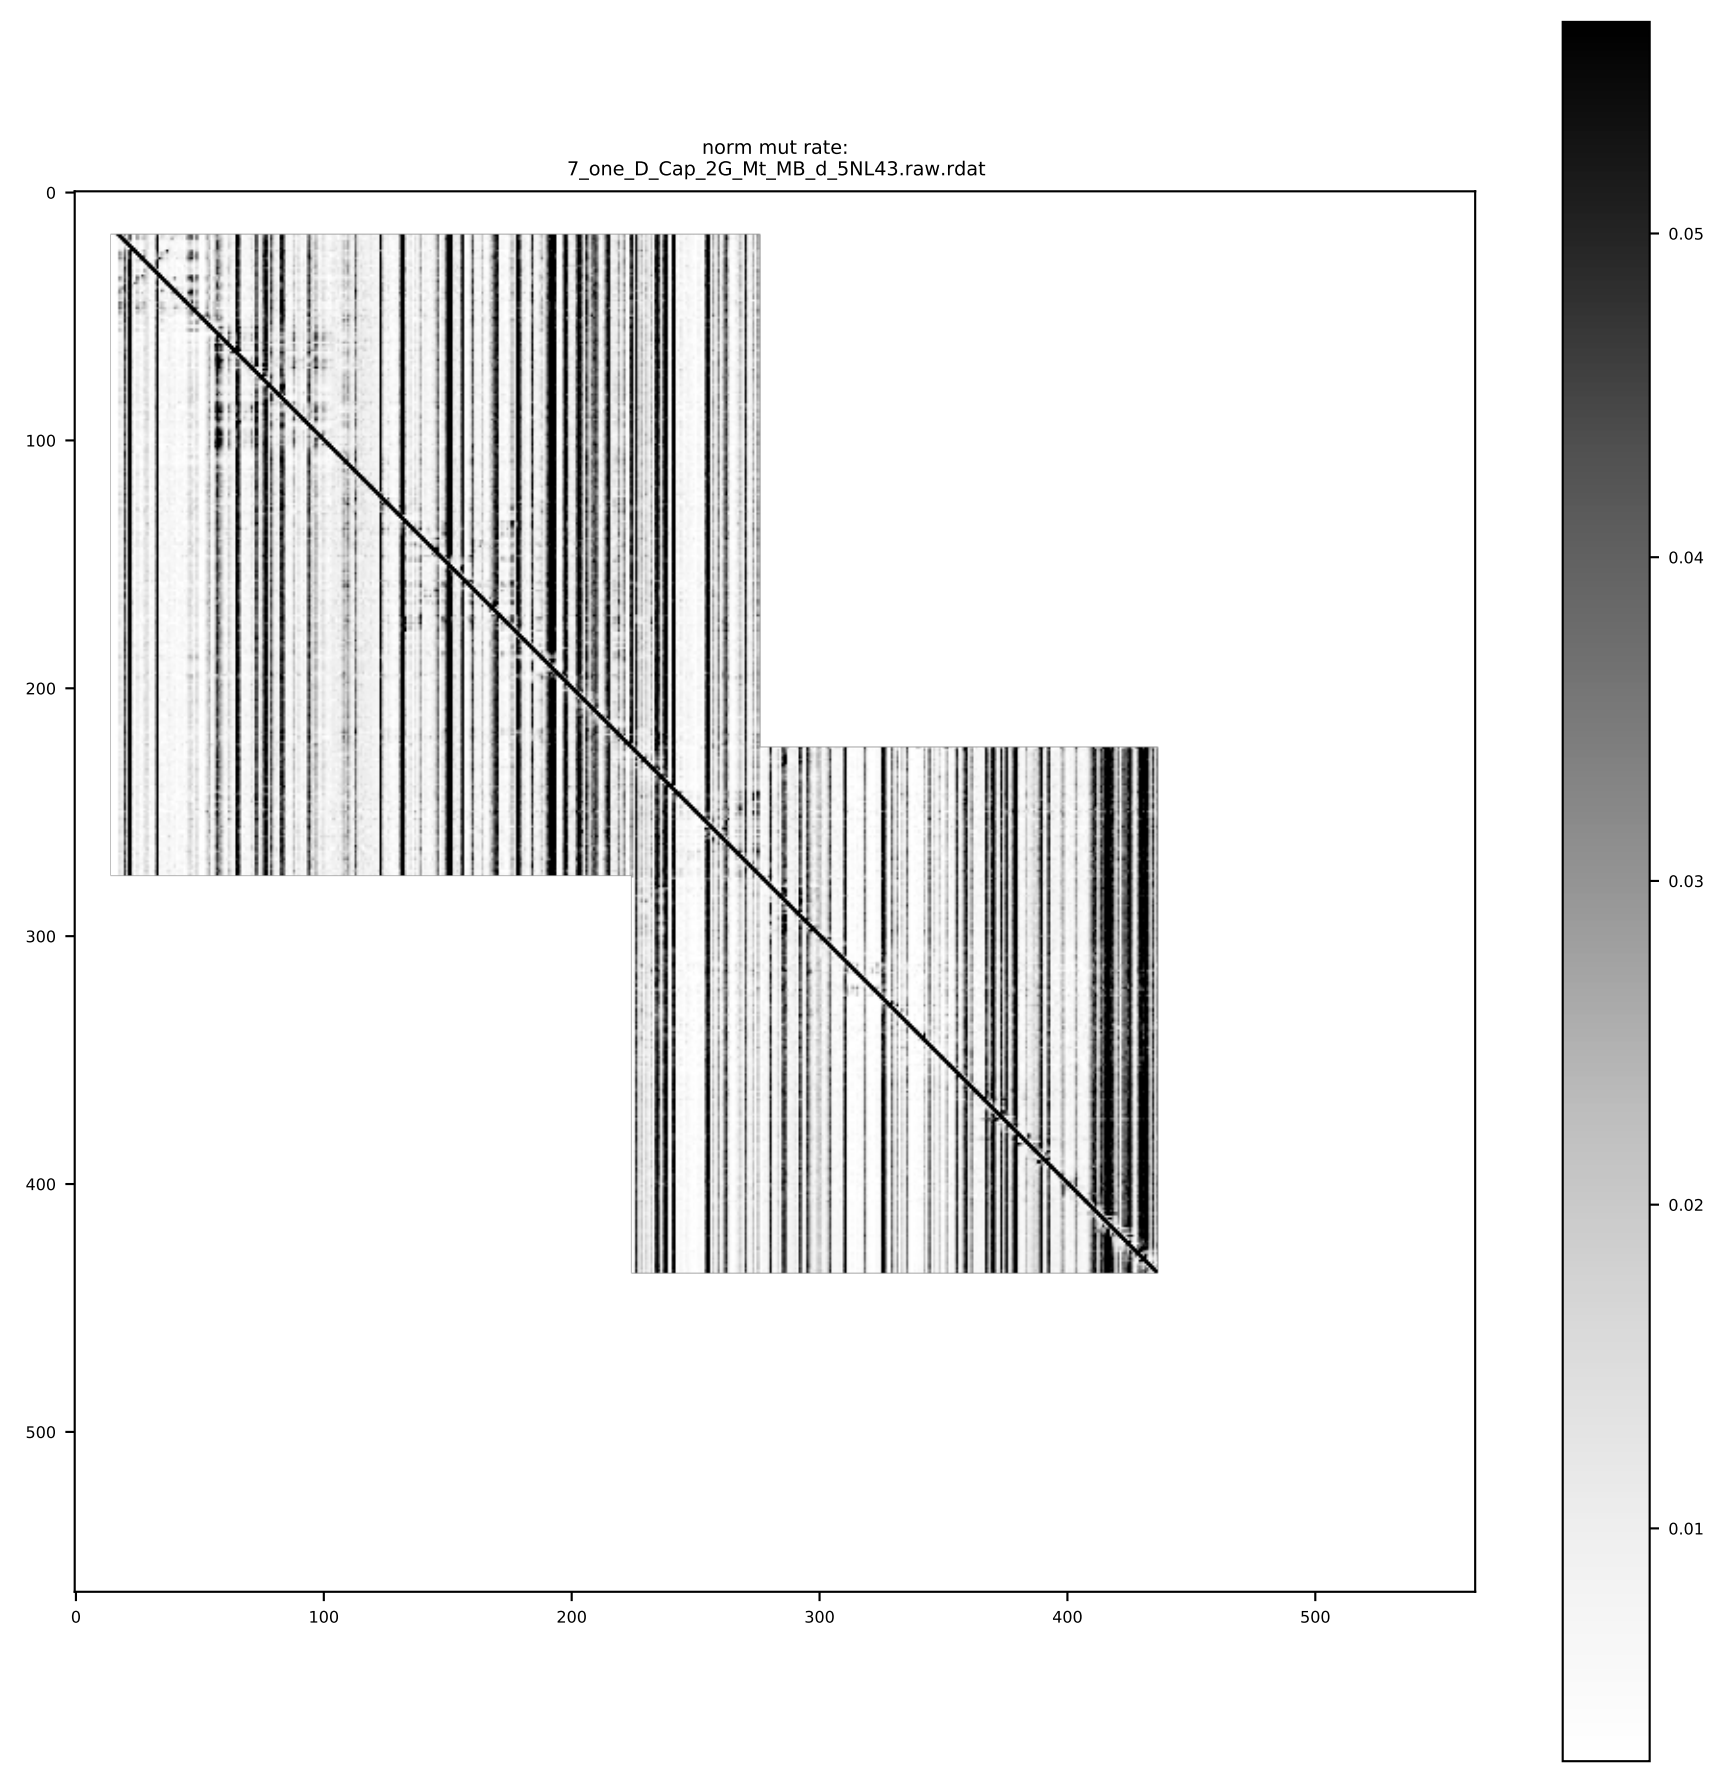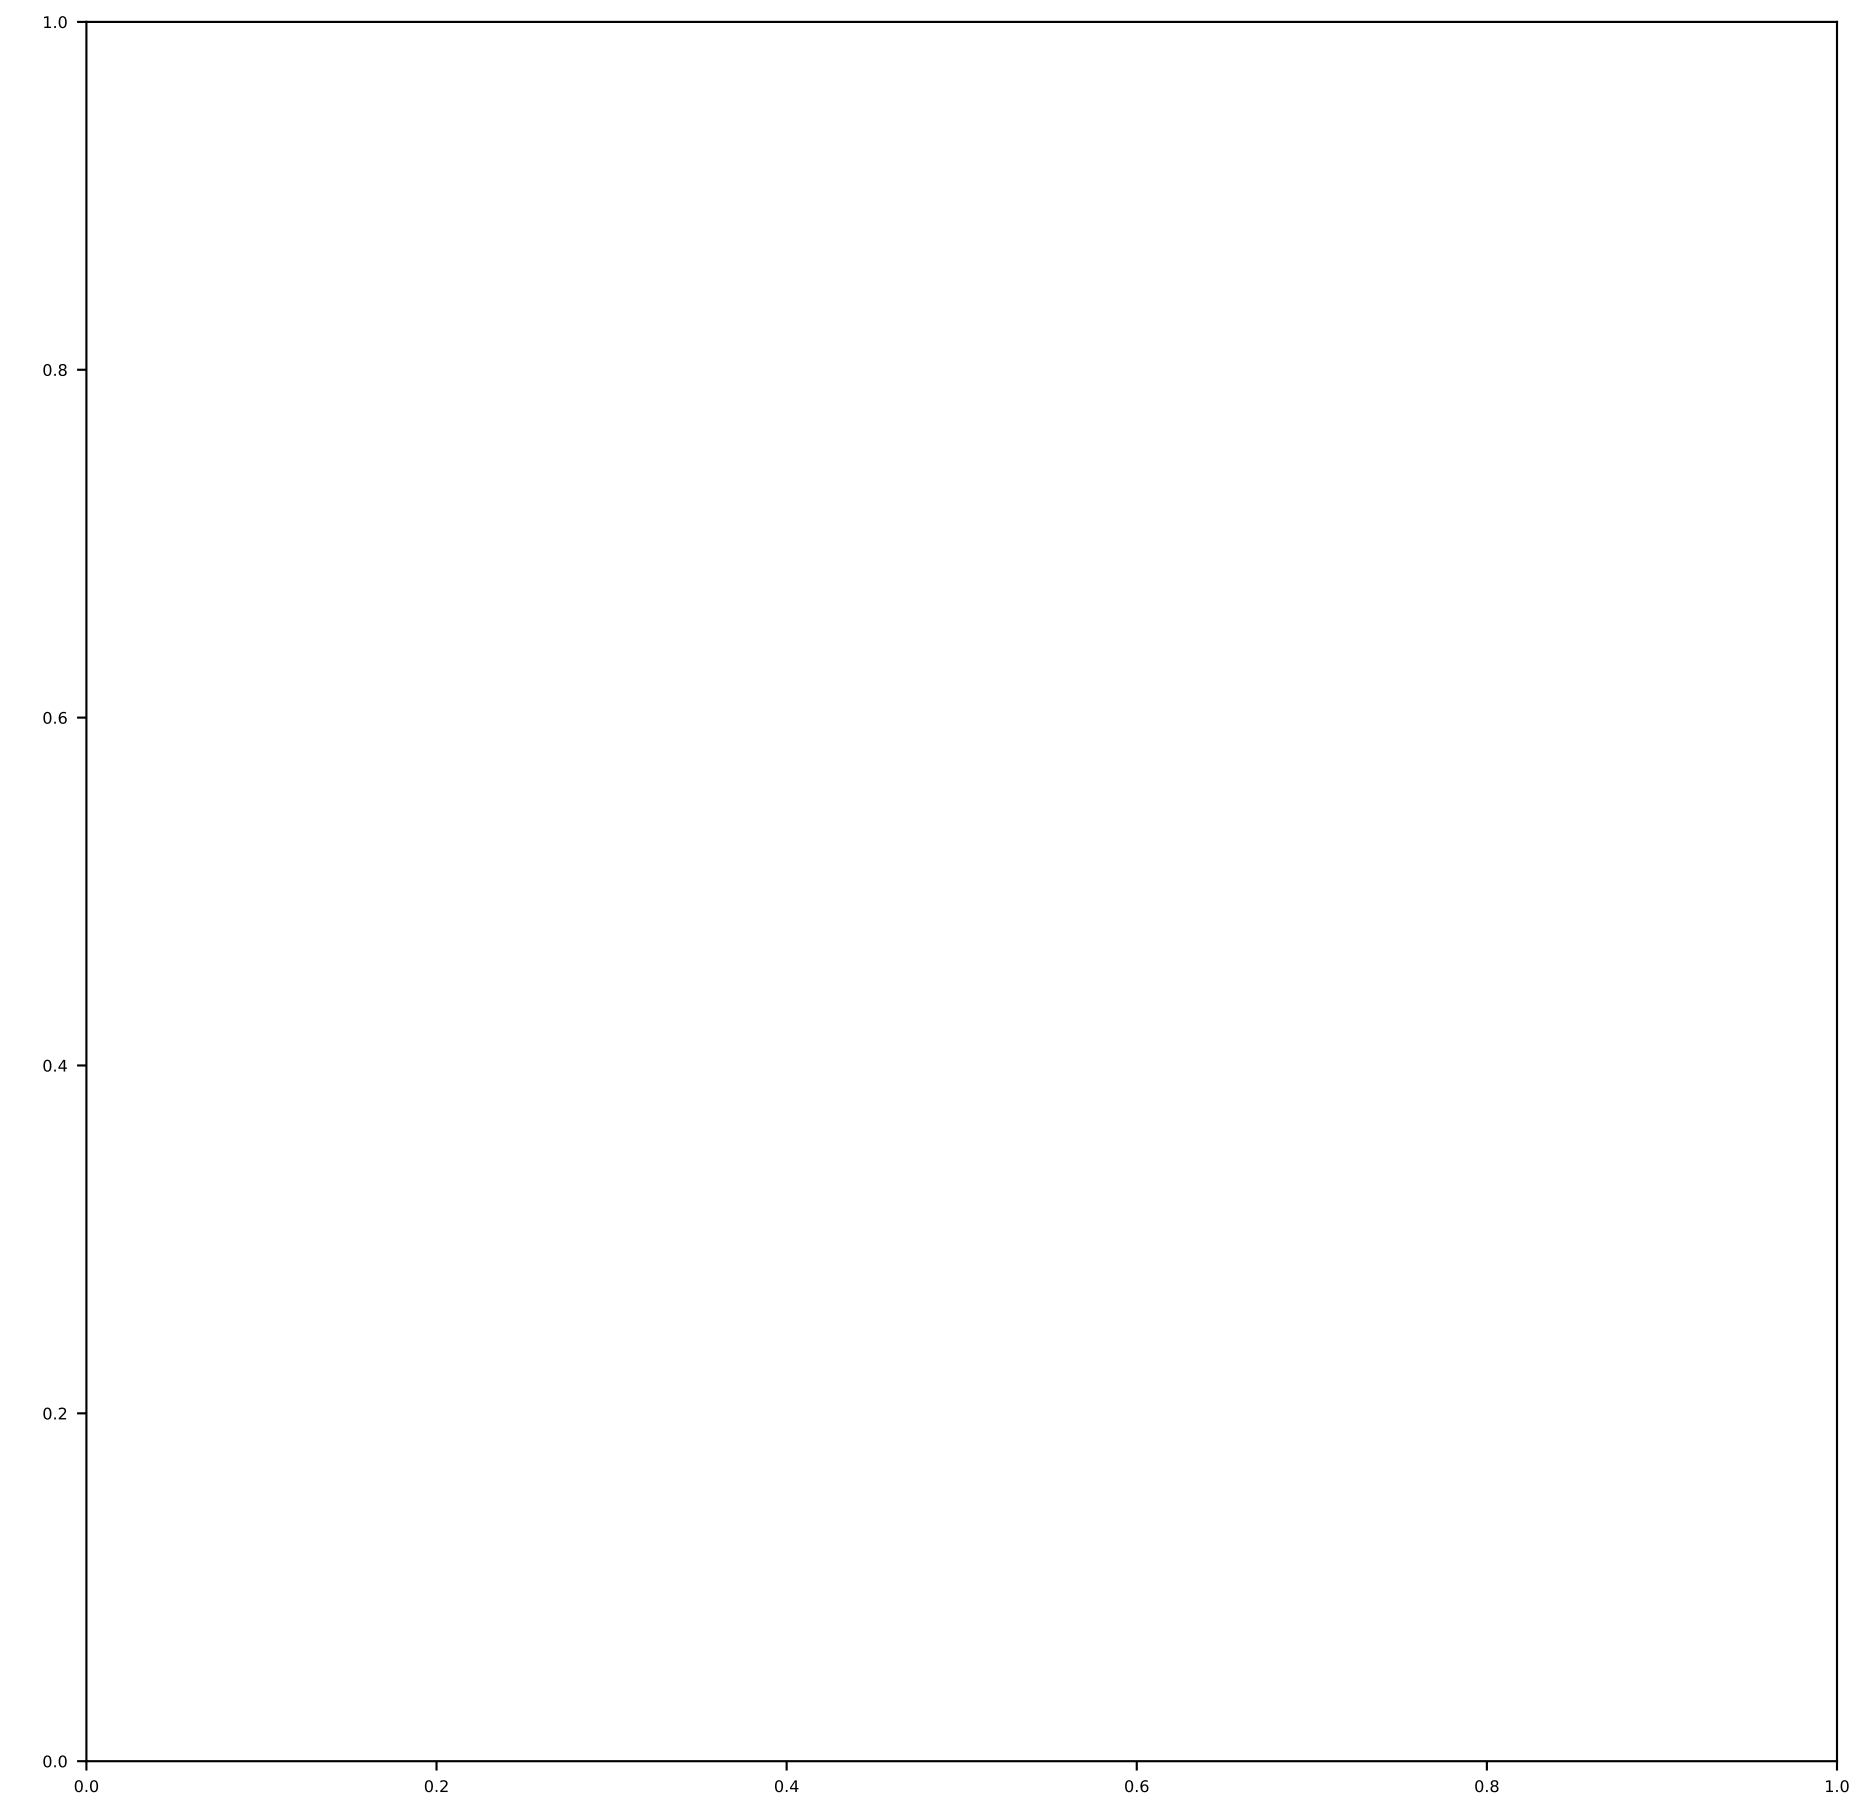

Supplement: Supplementary file 23 [file one_two_G_dimer_mut_rates.pdf › 2d-structure-inference/mut_rates/one_two_G_dimer_mut_rates.pdf]

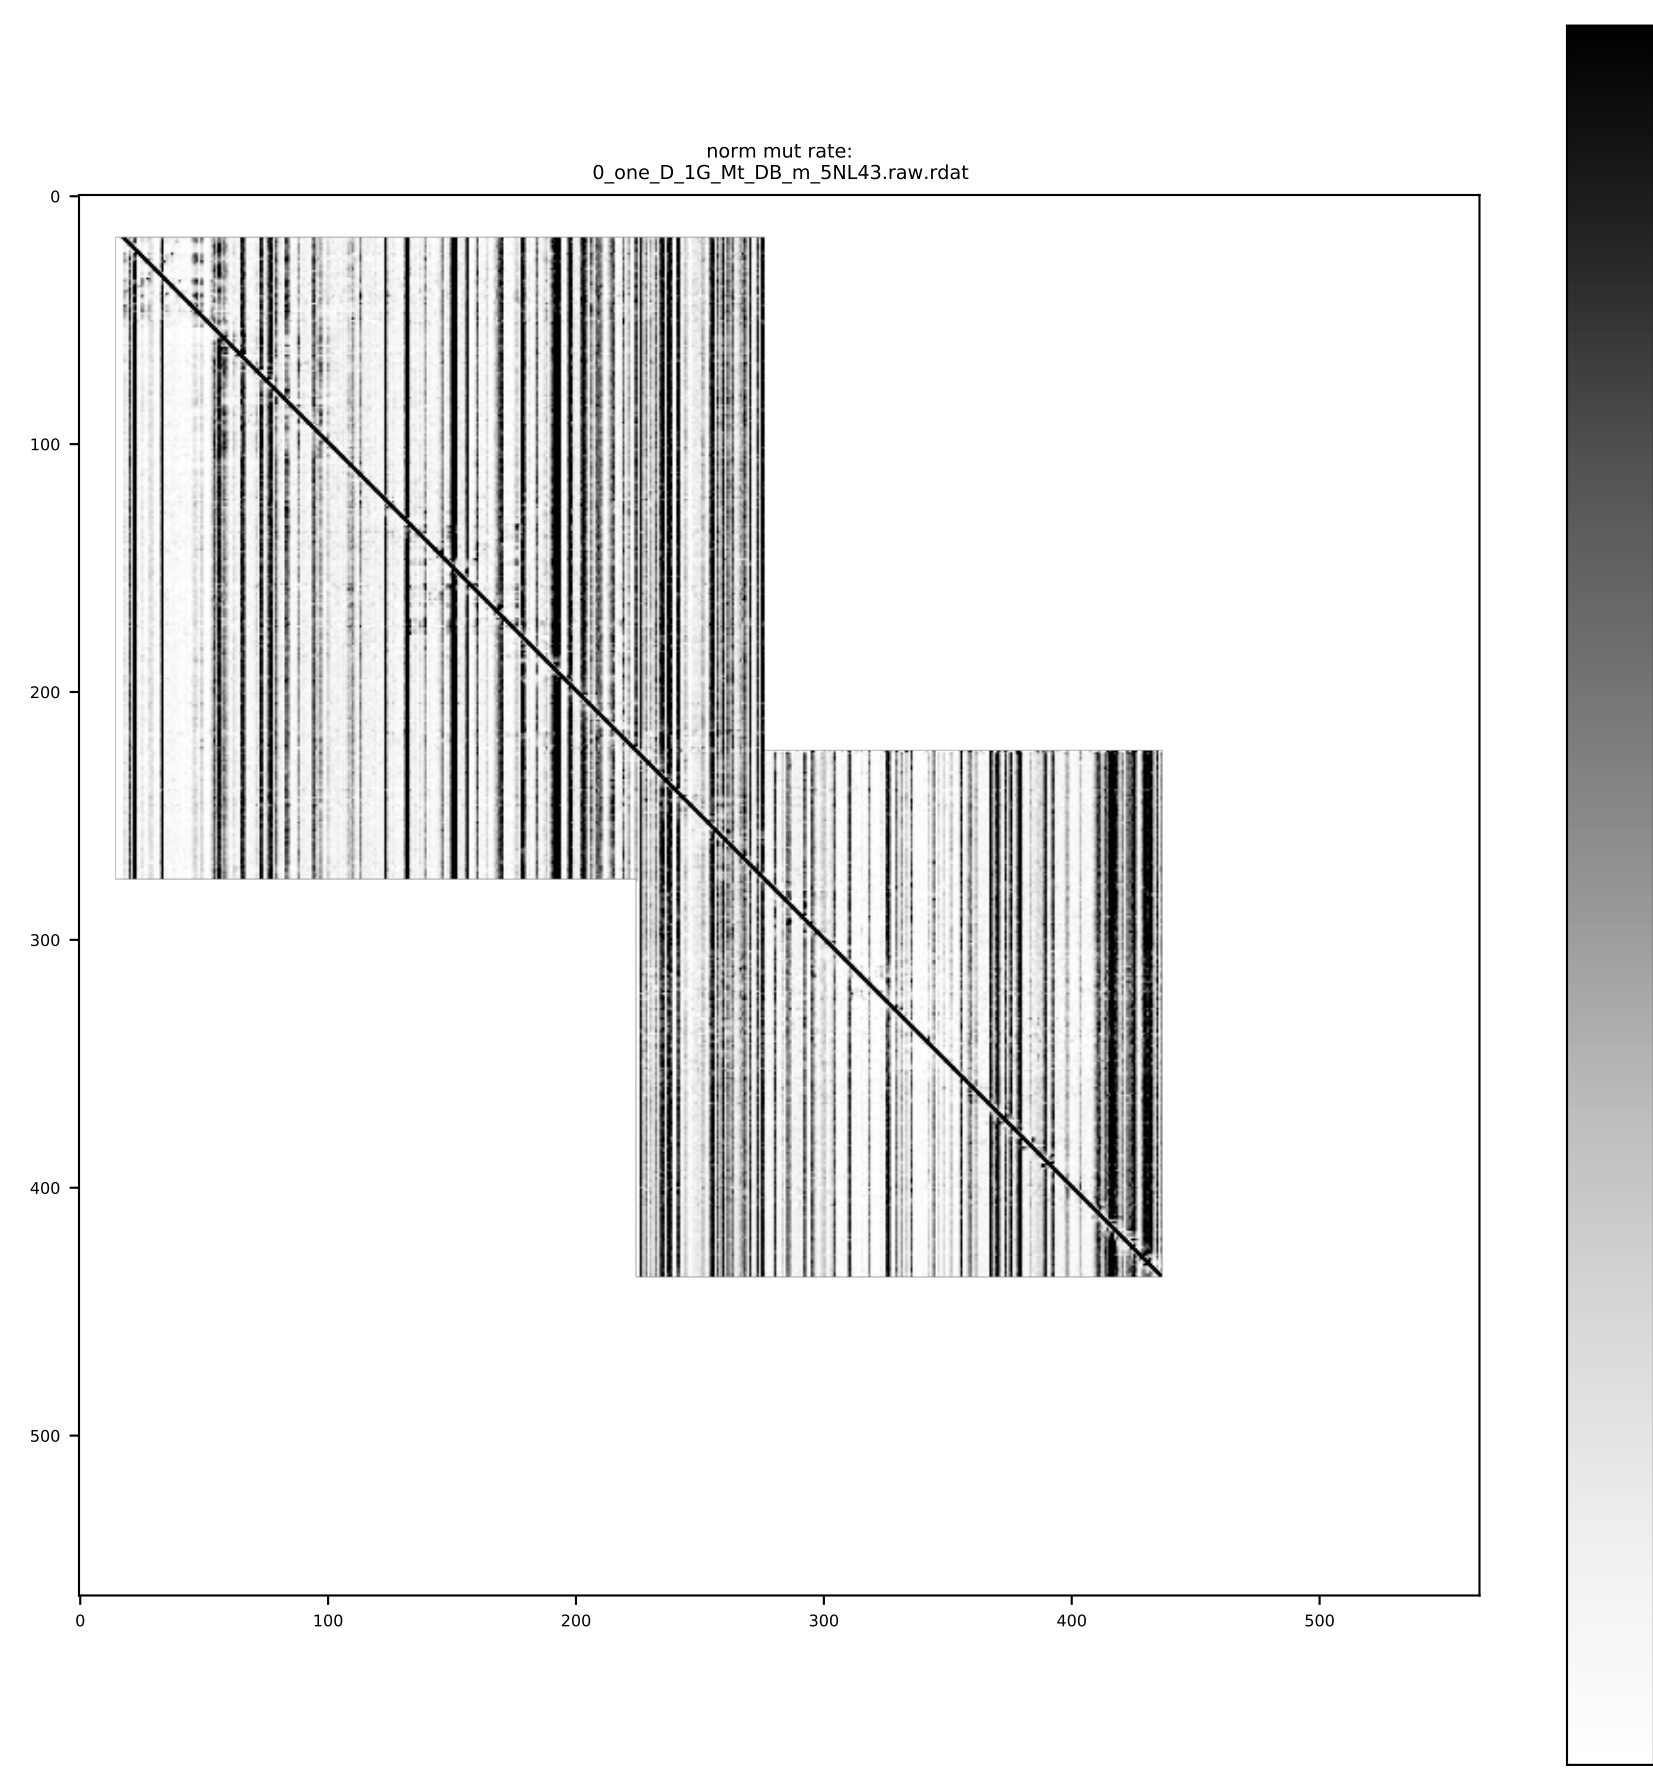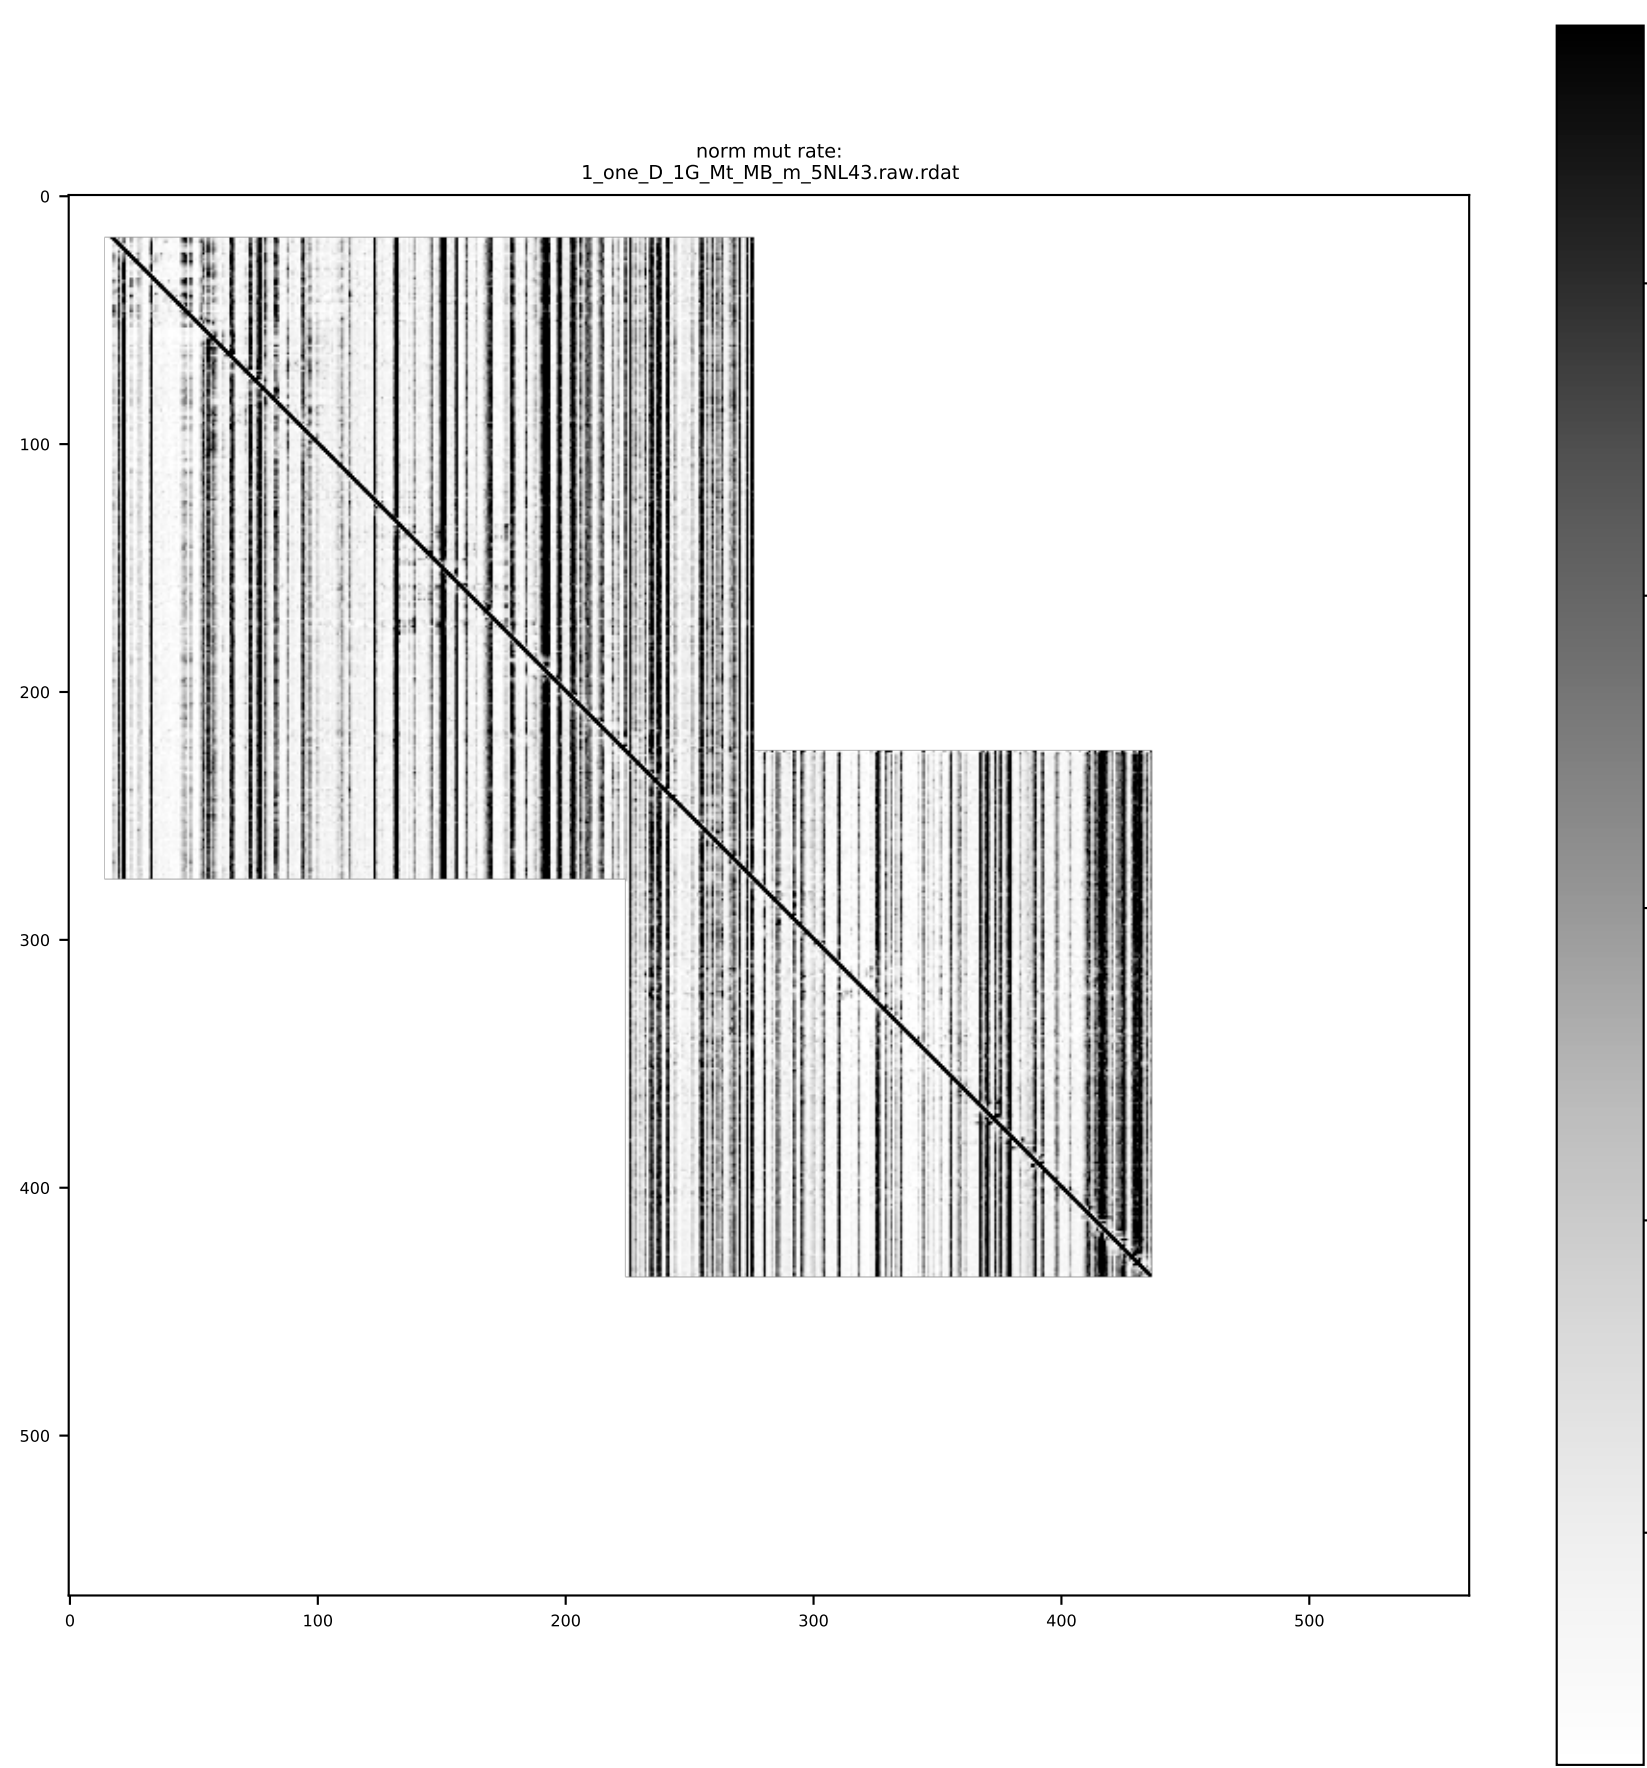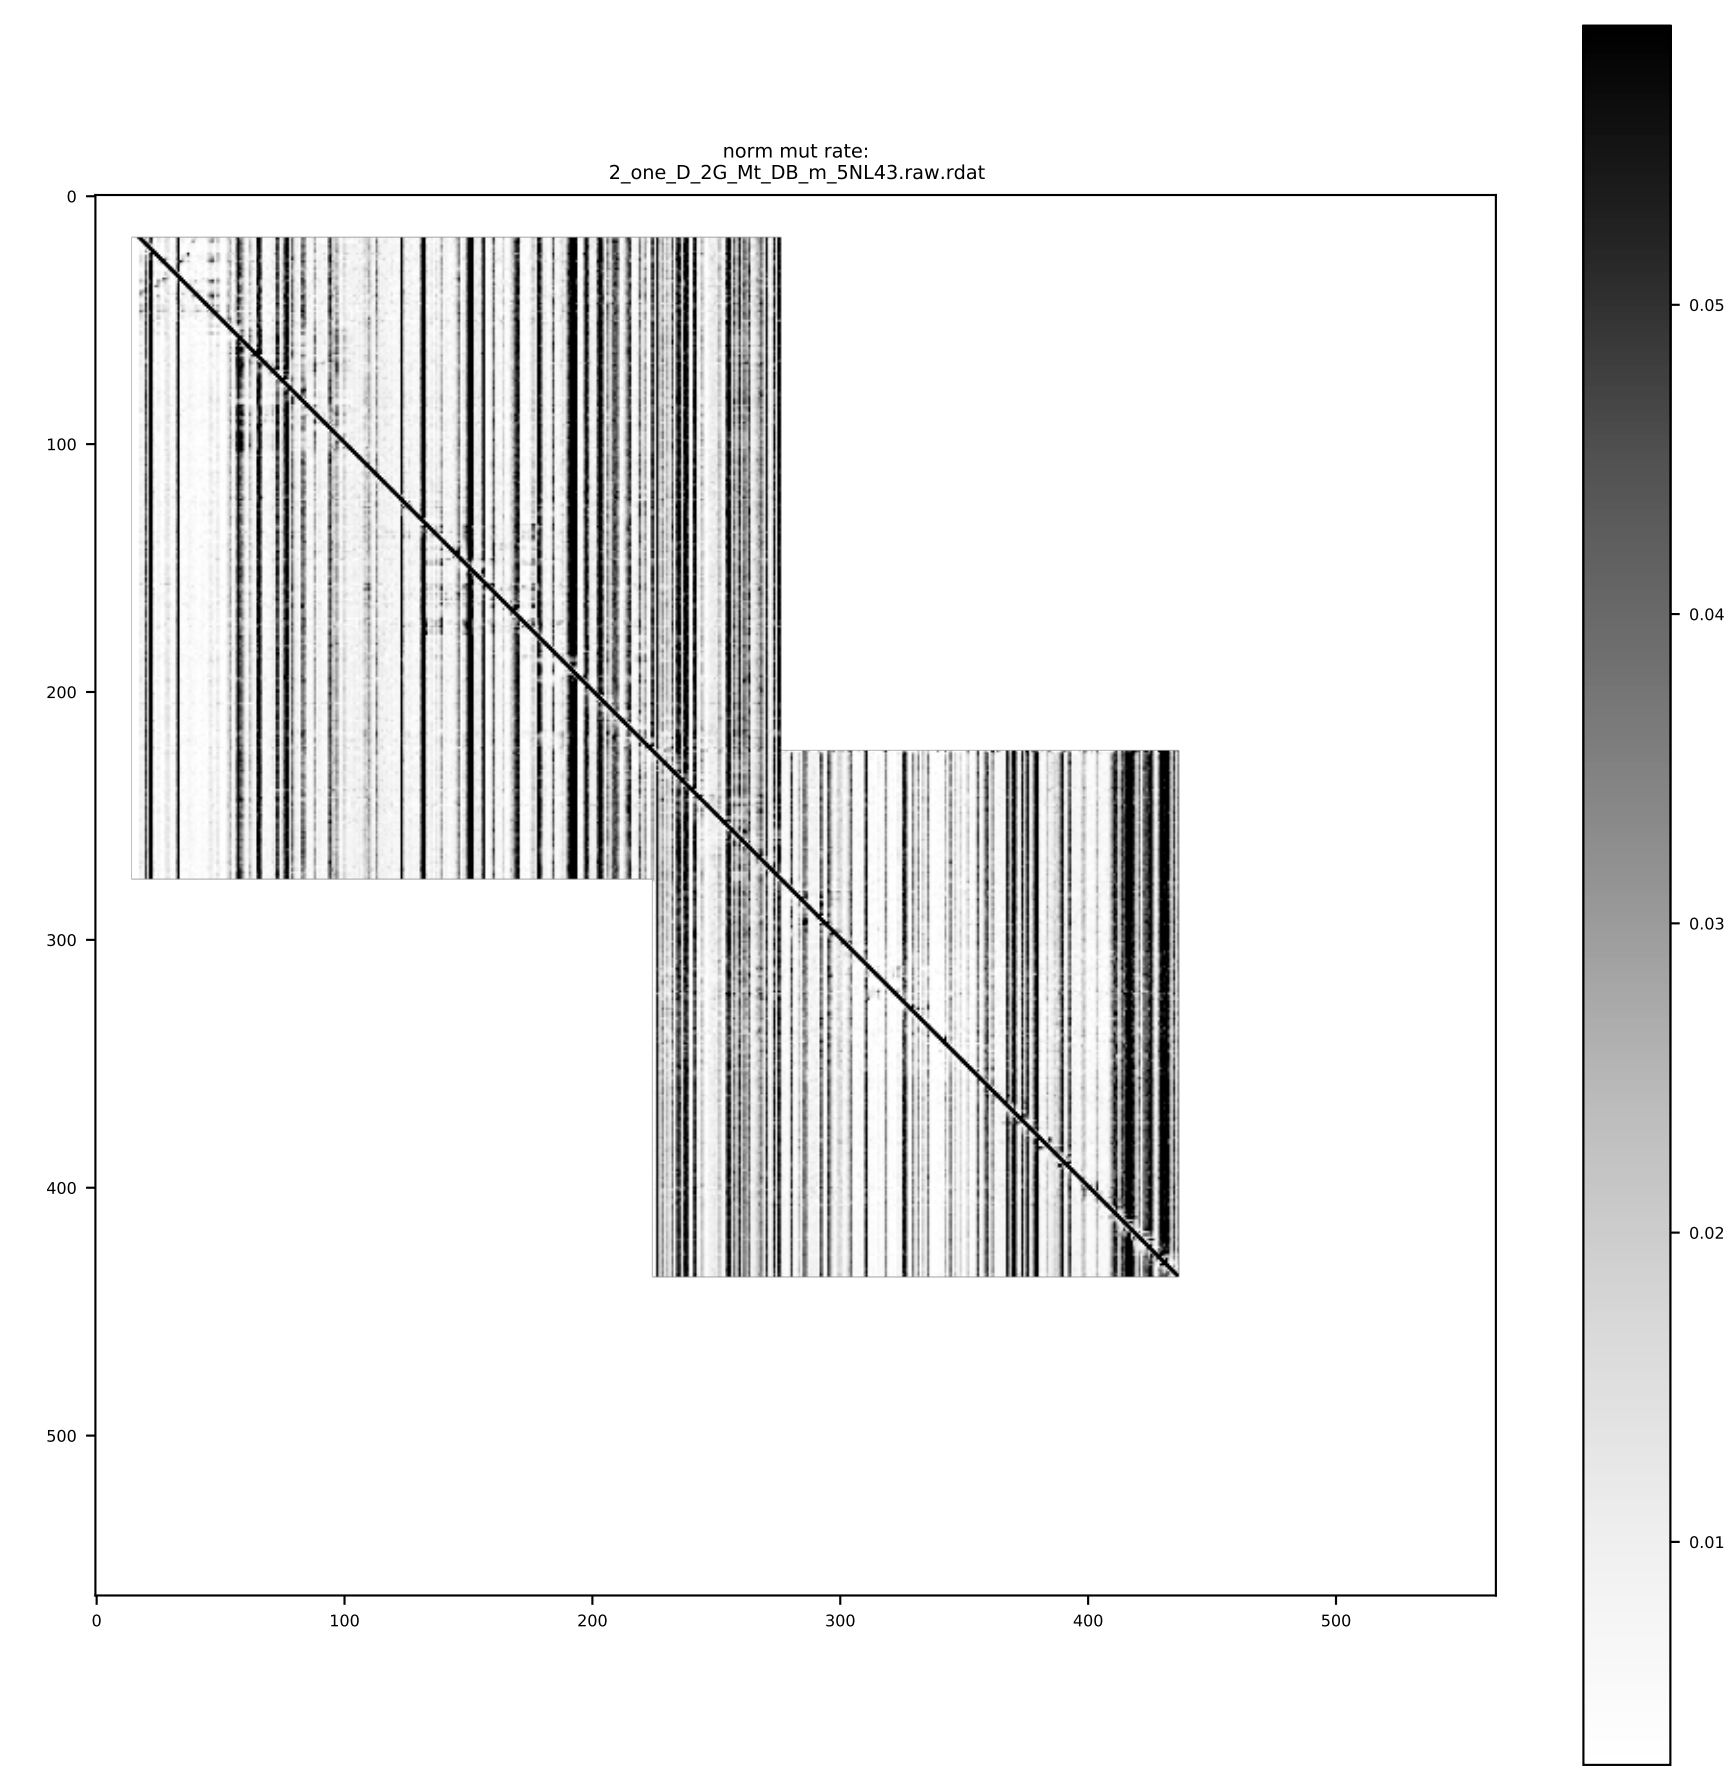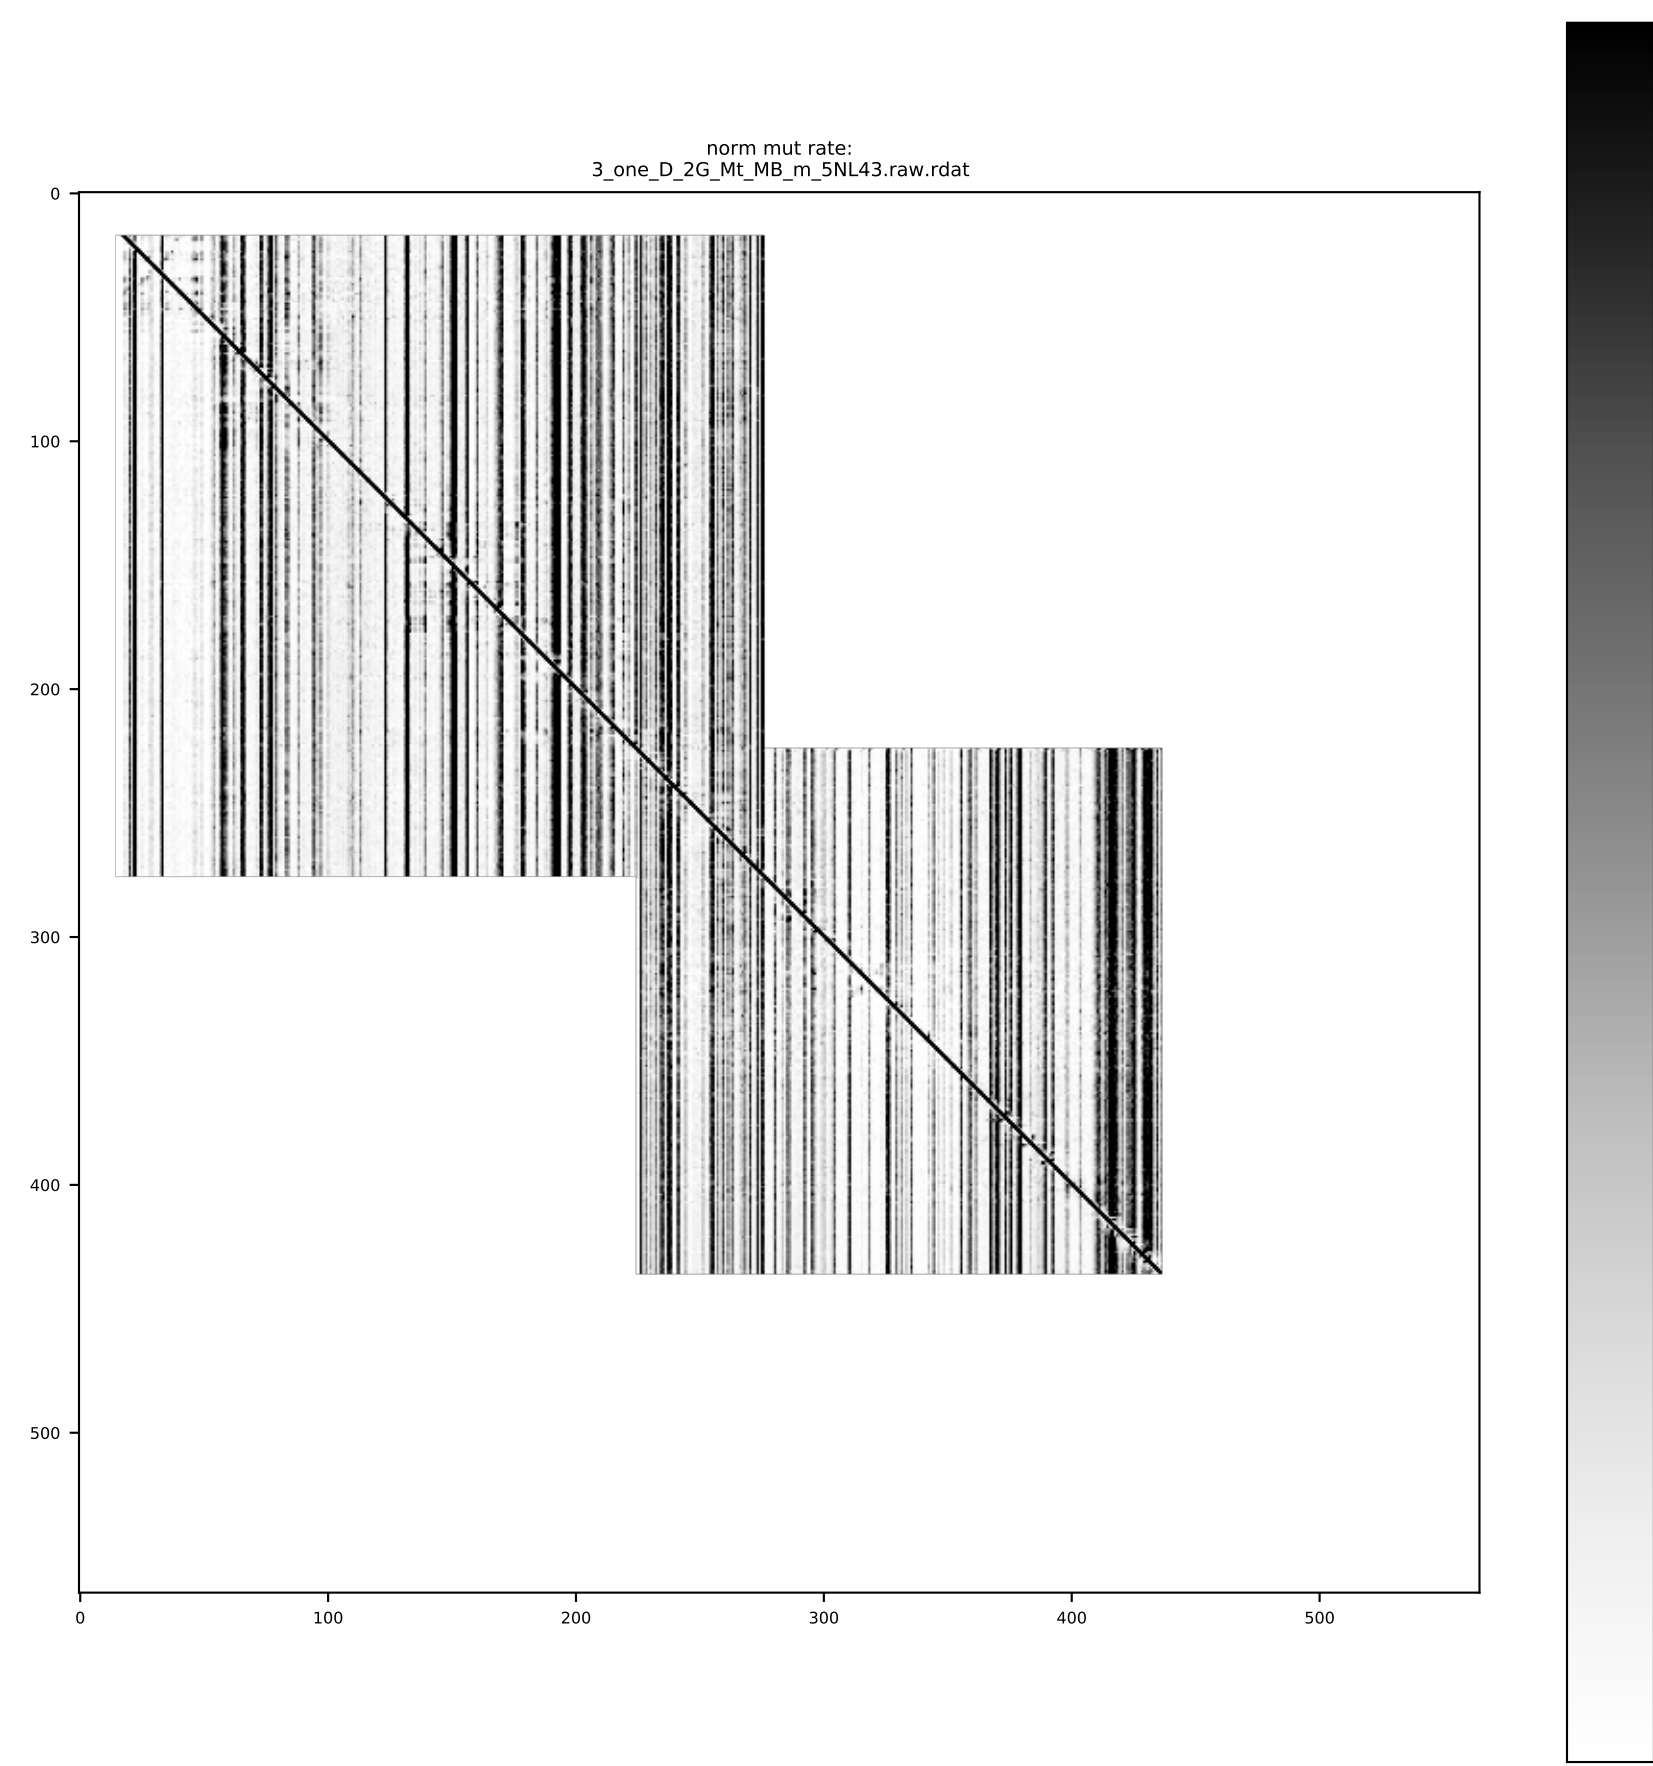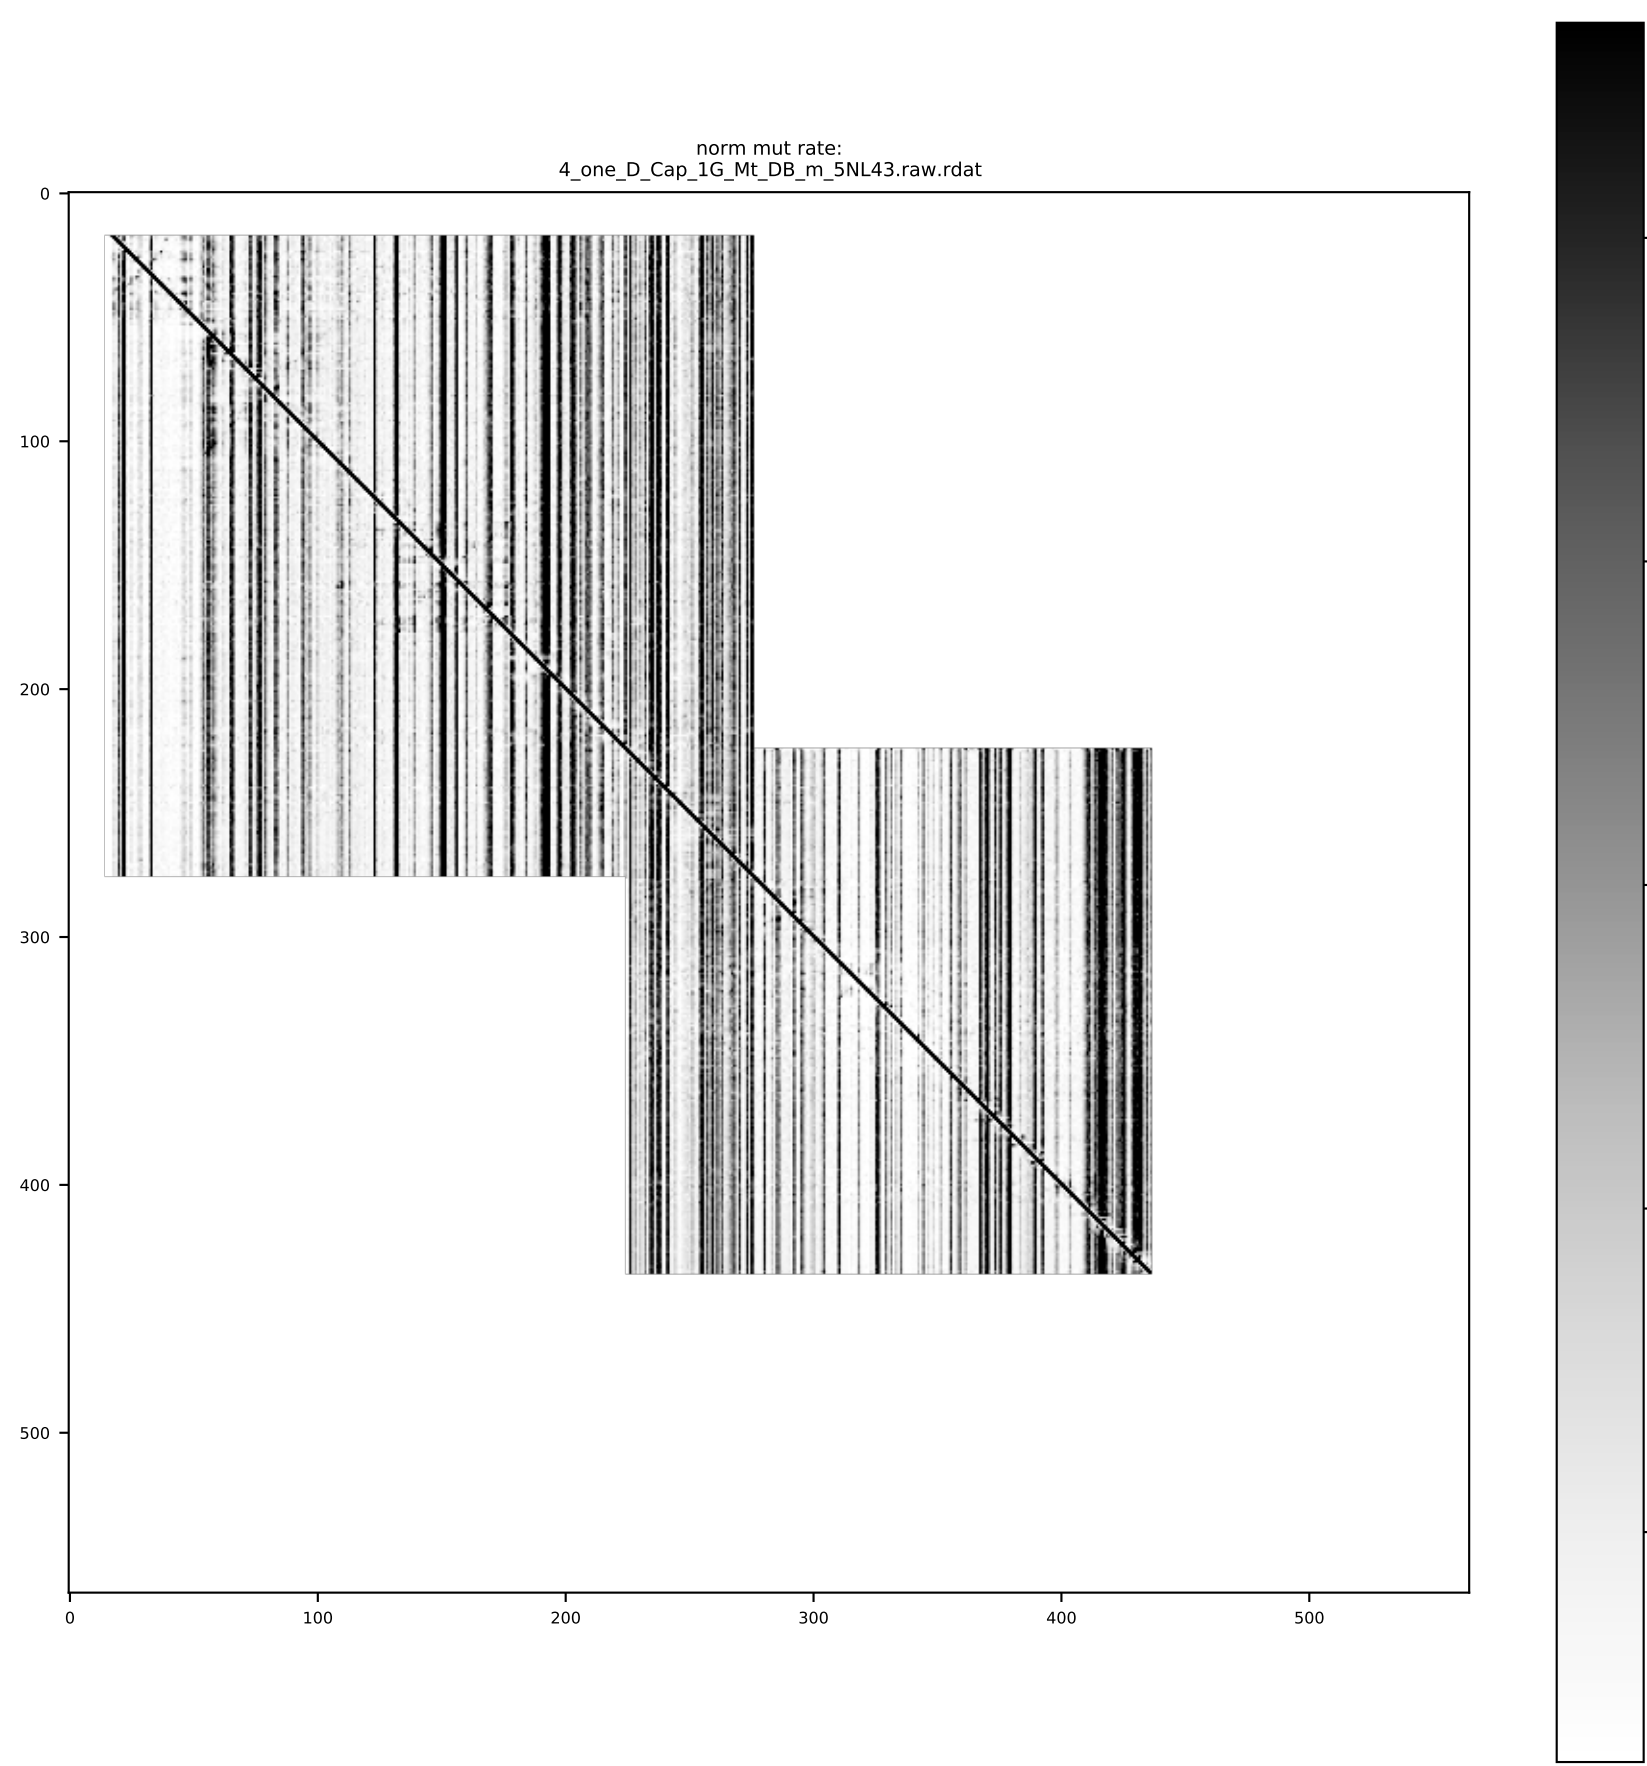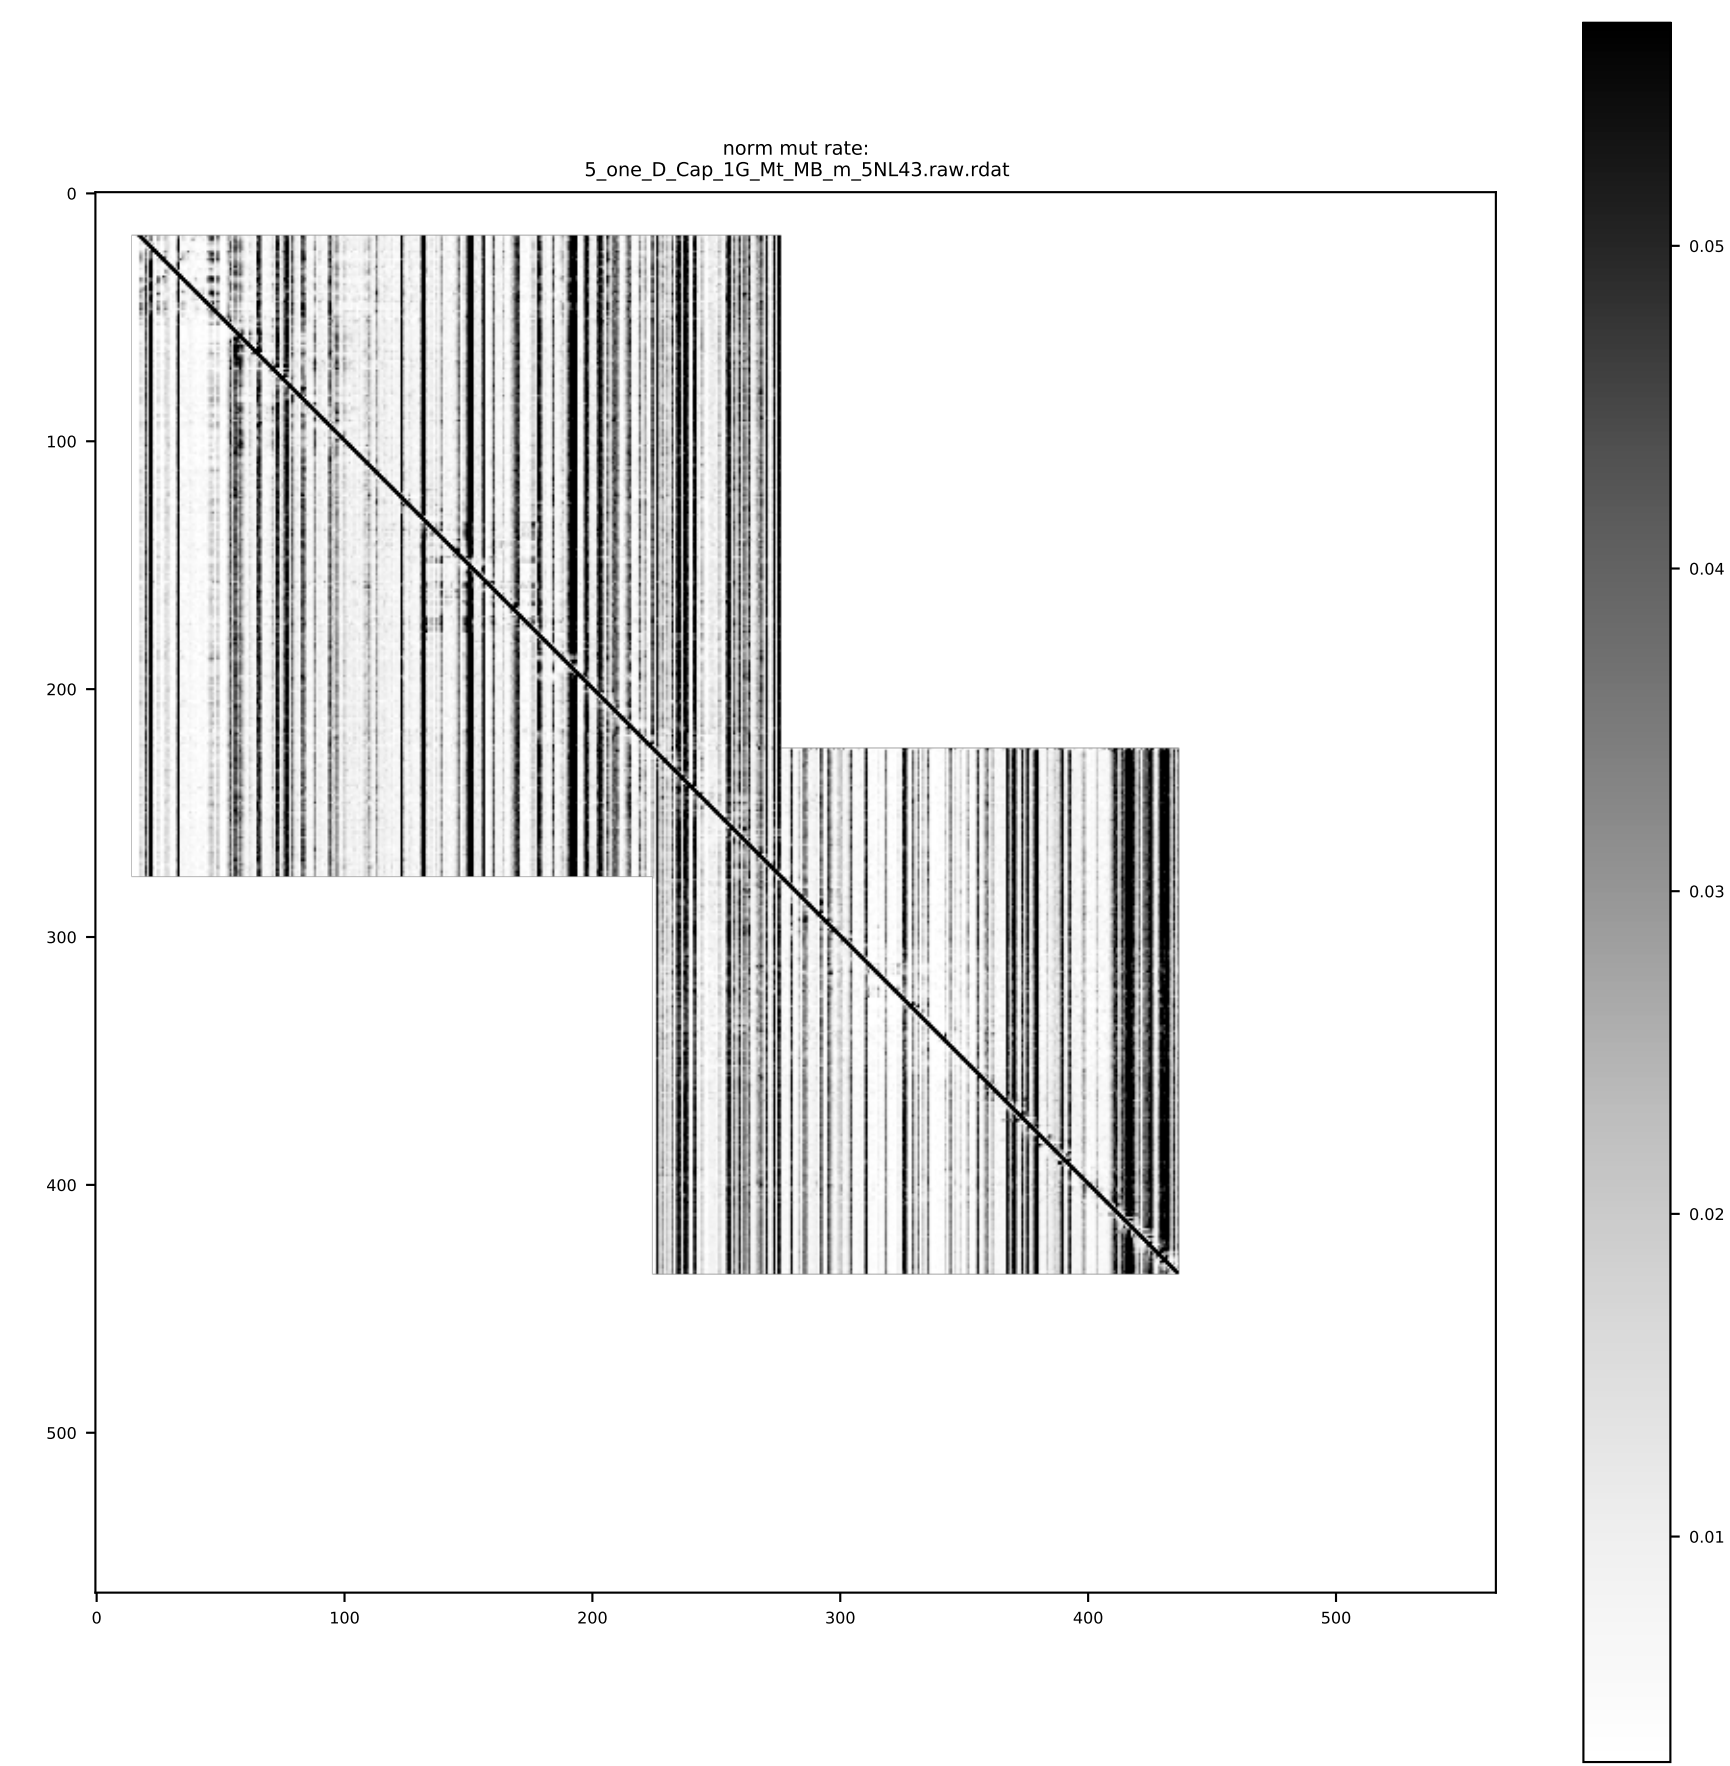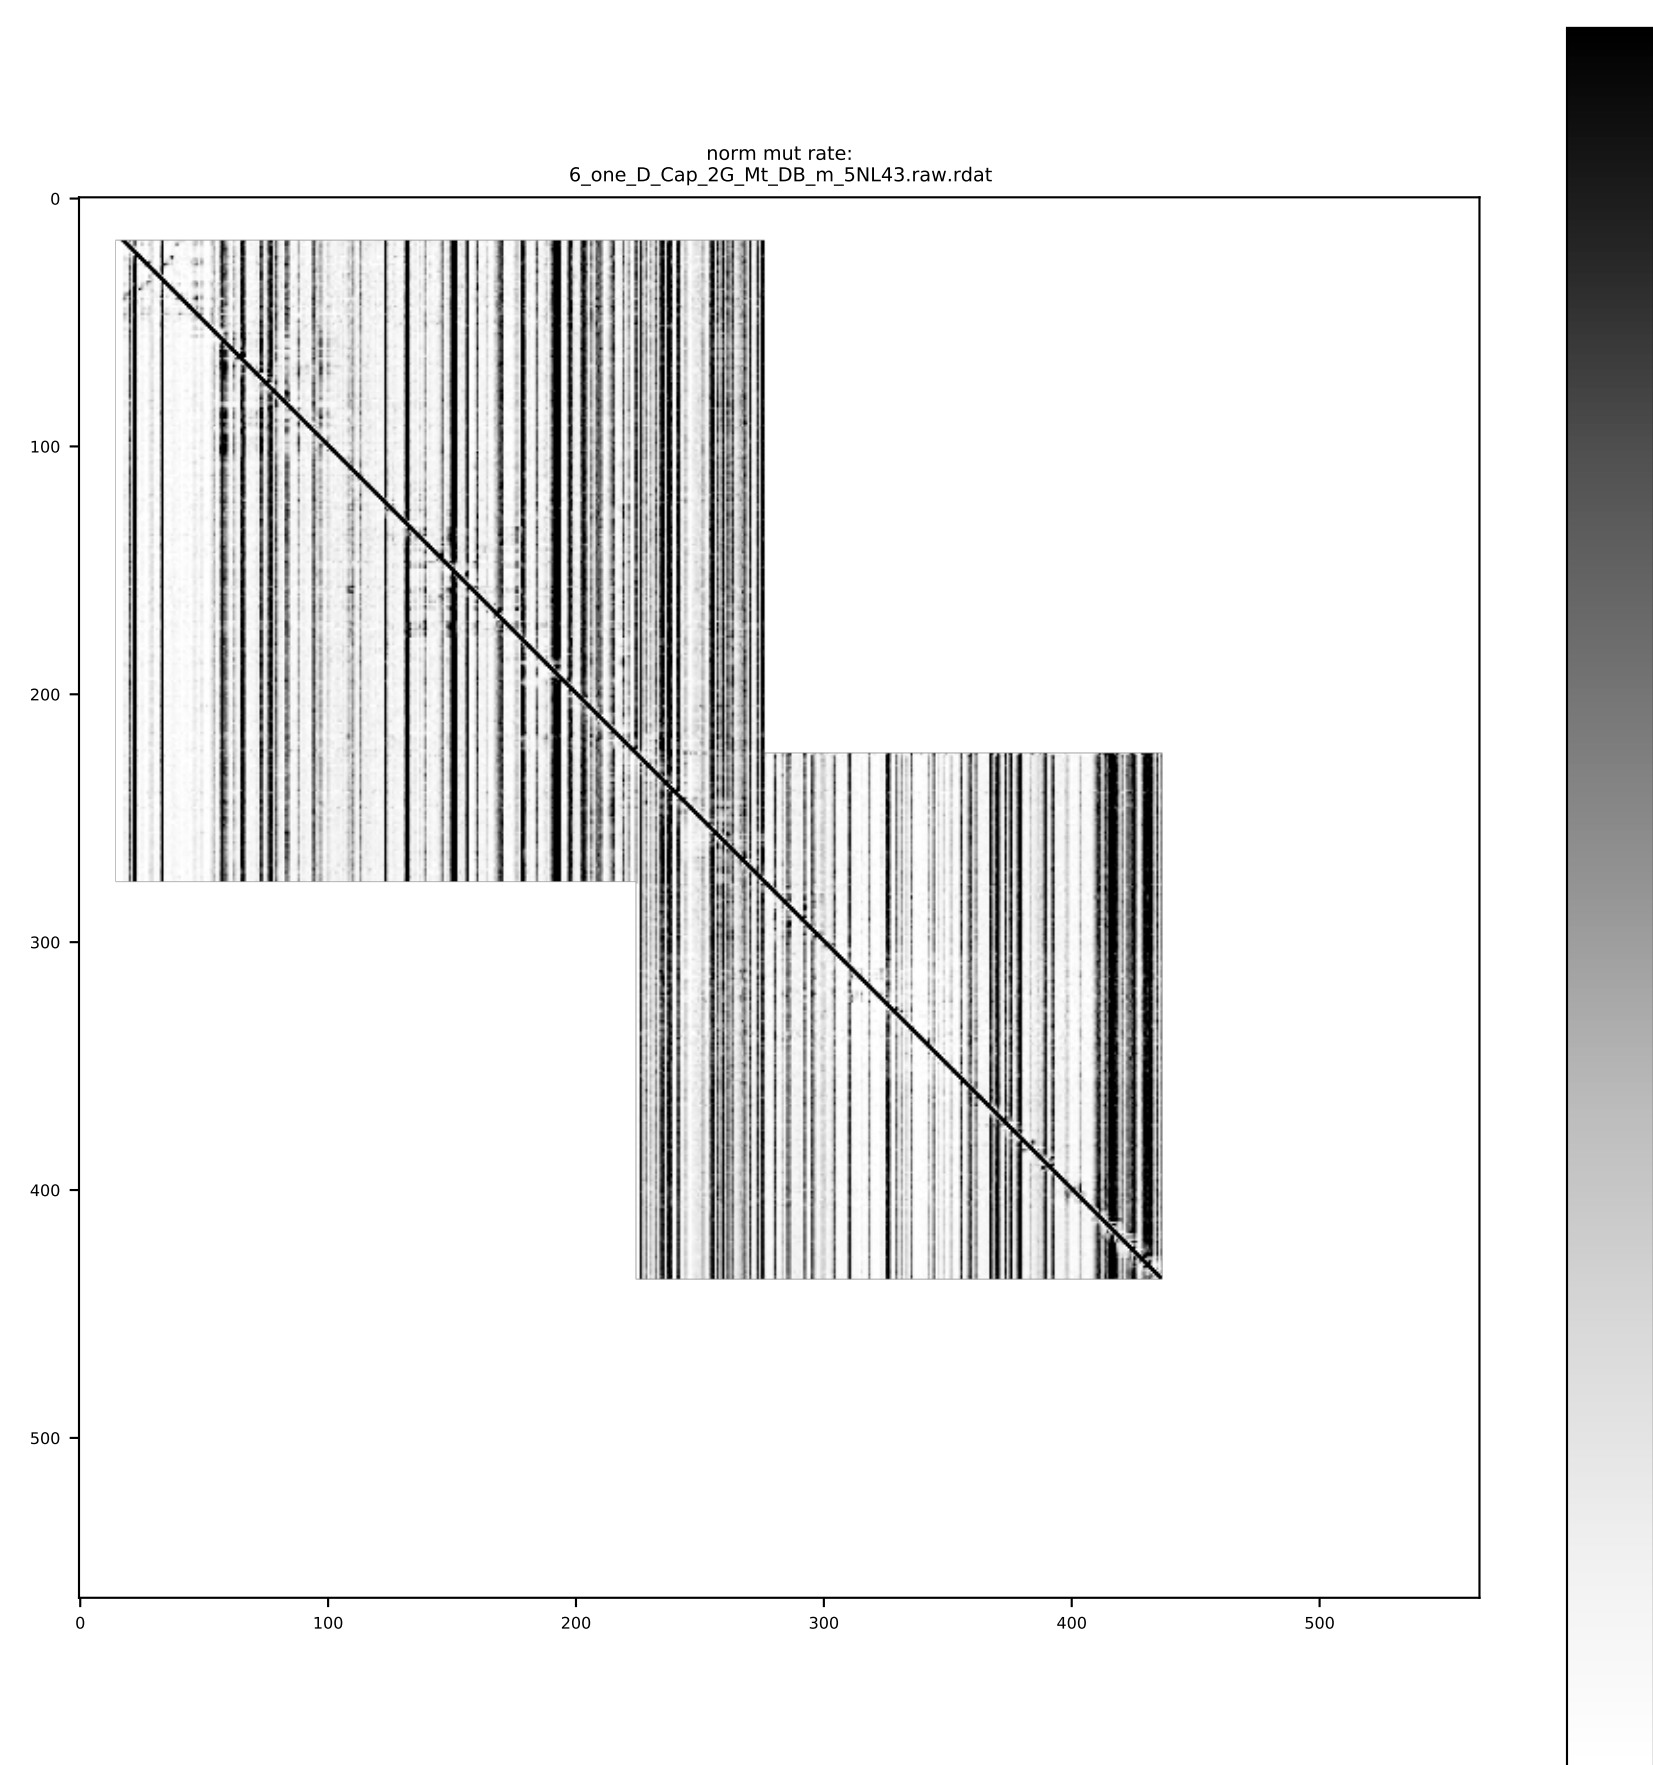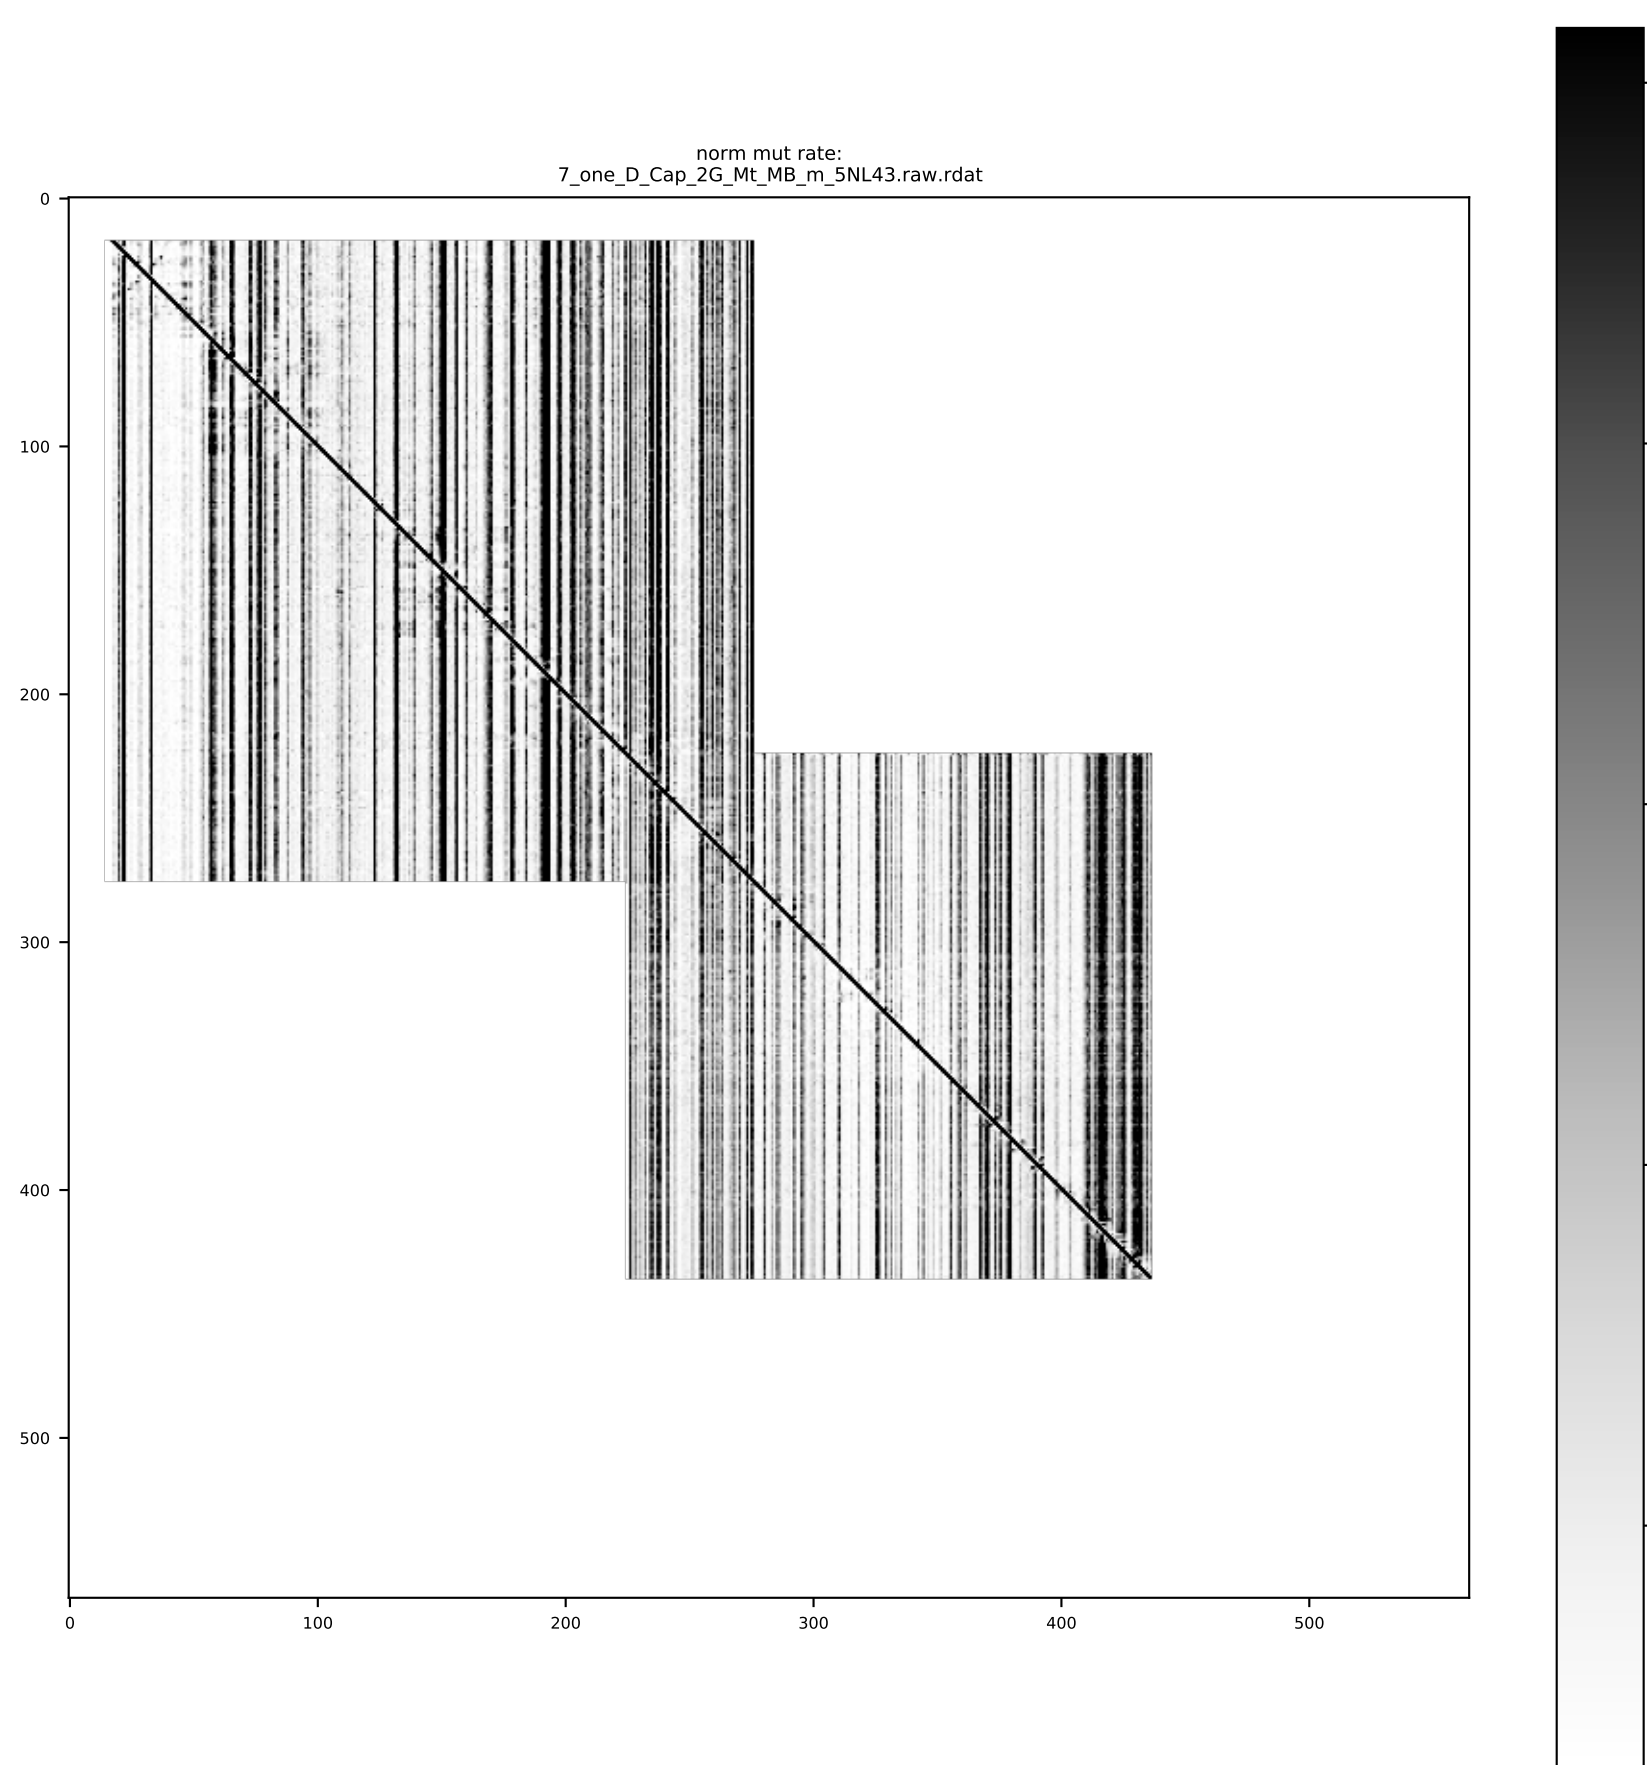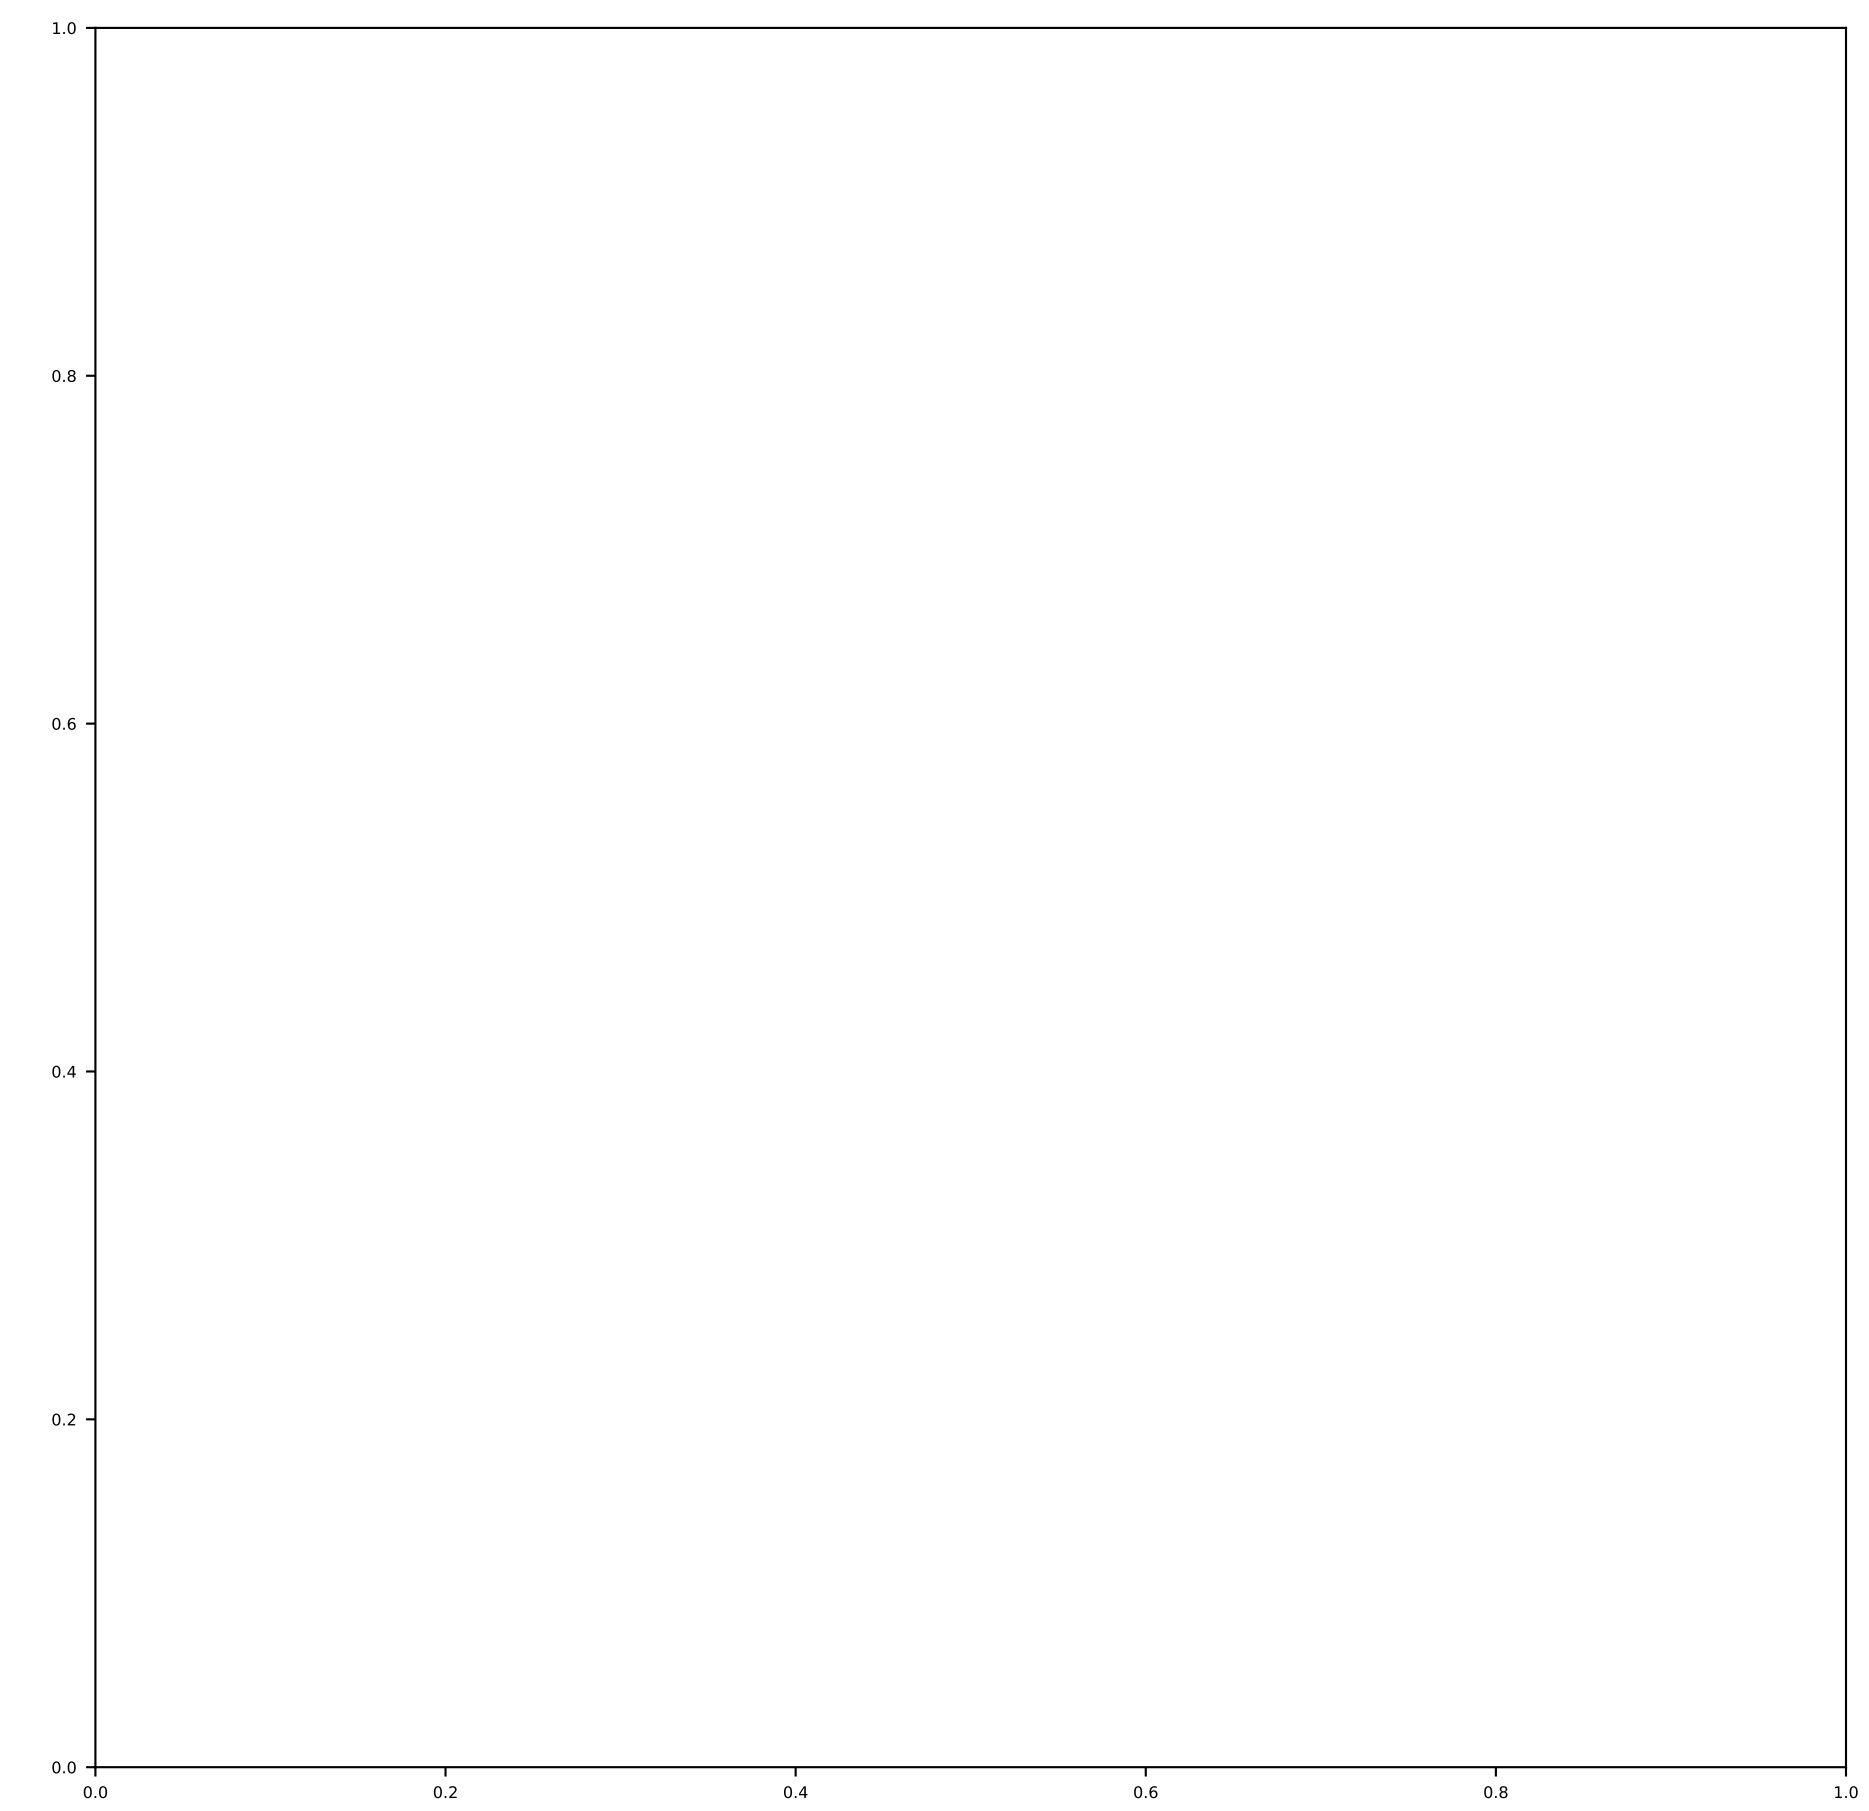

Supplement: Supplementary file 24 [file one_two_G_monomer_mut_rates.pdf › 2d-structure-inference/mut_rates/one_two_G_monomer_mut_rates.pdf]

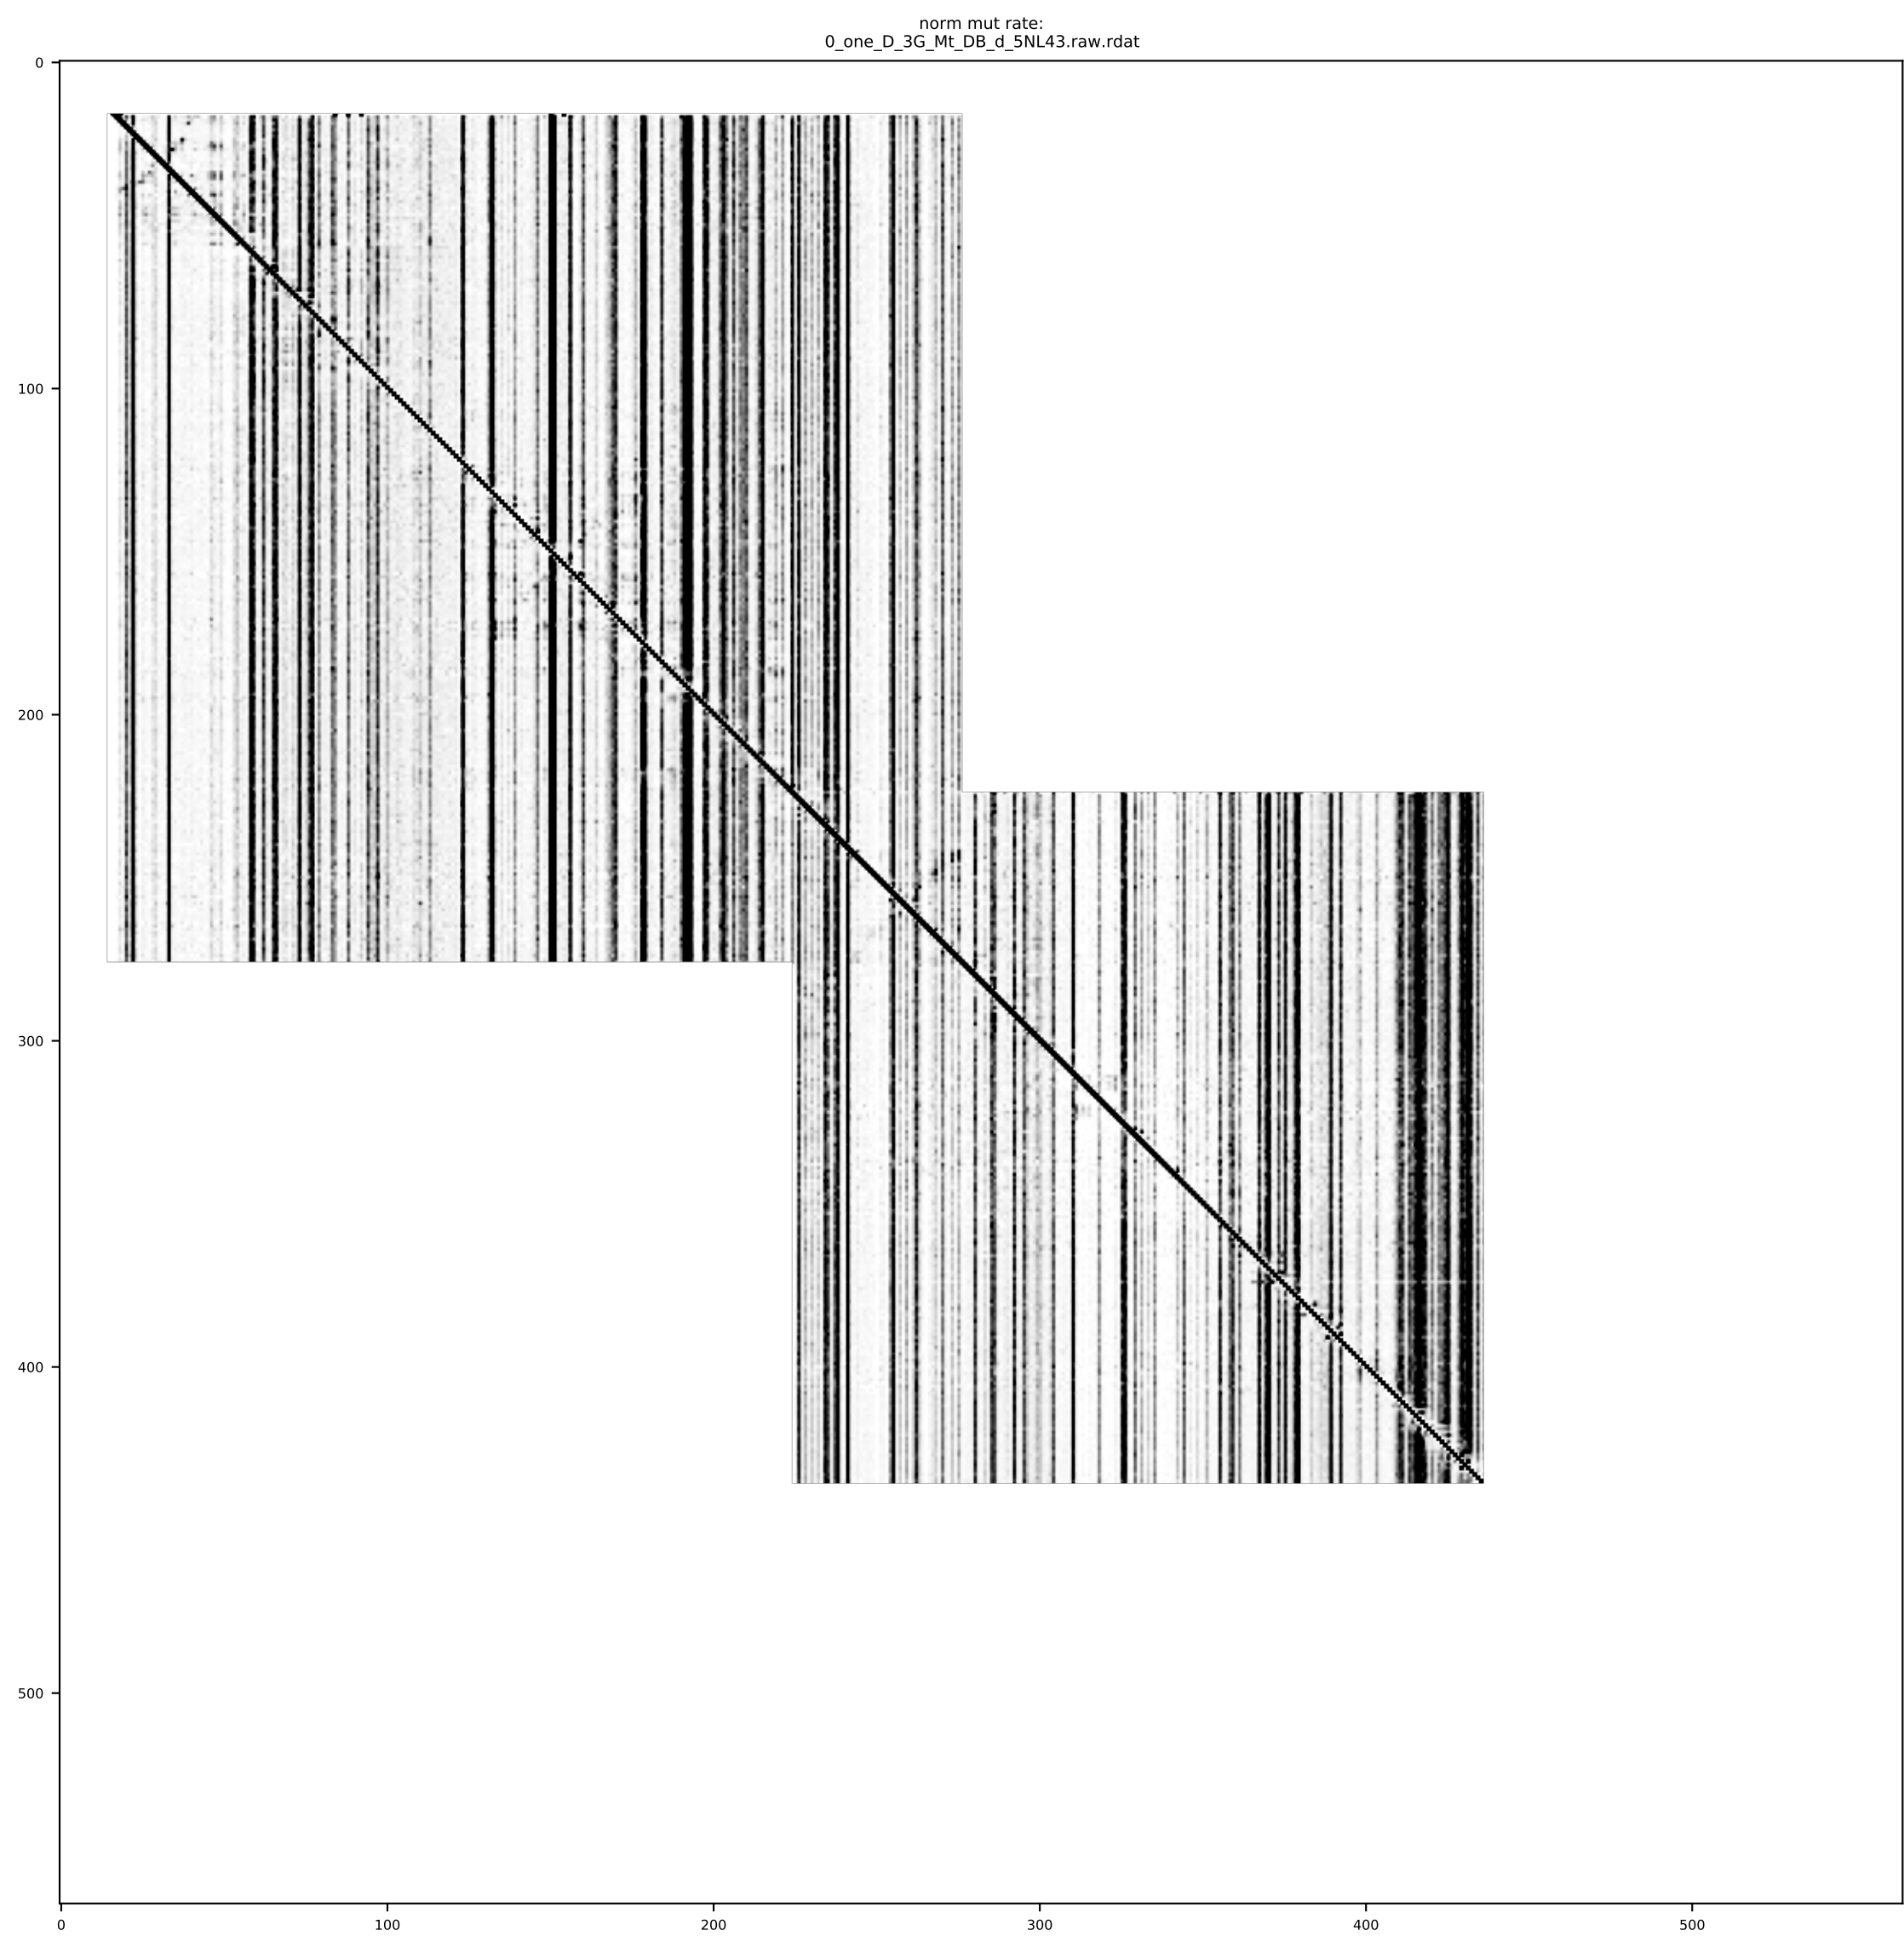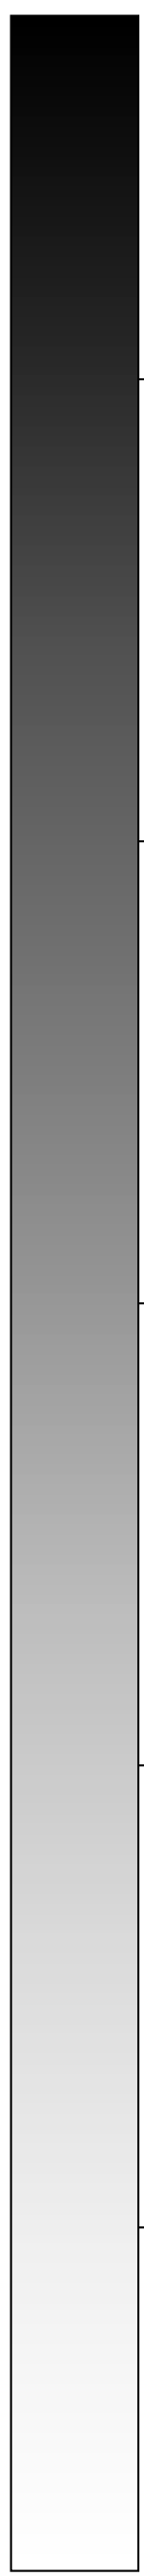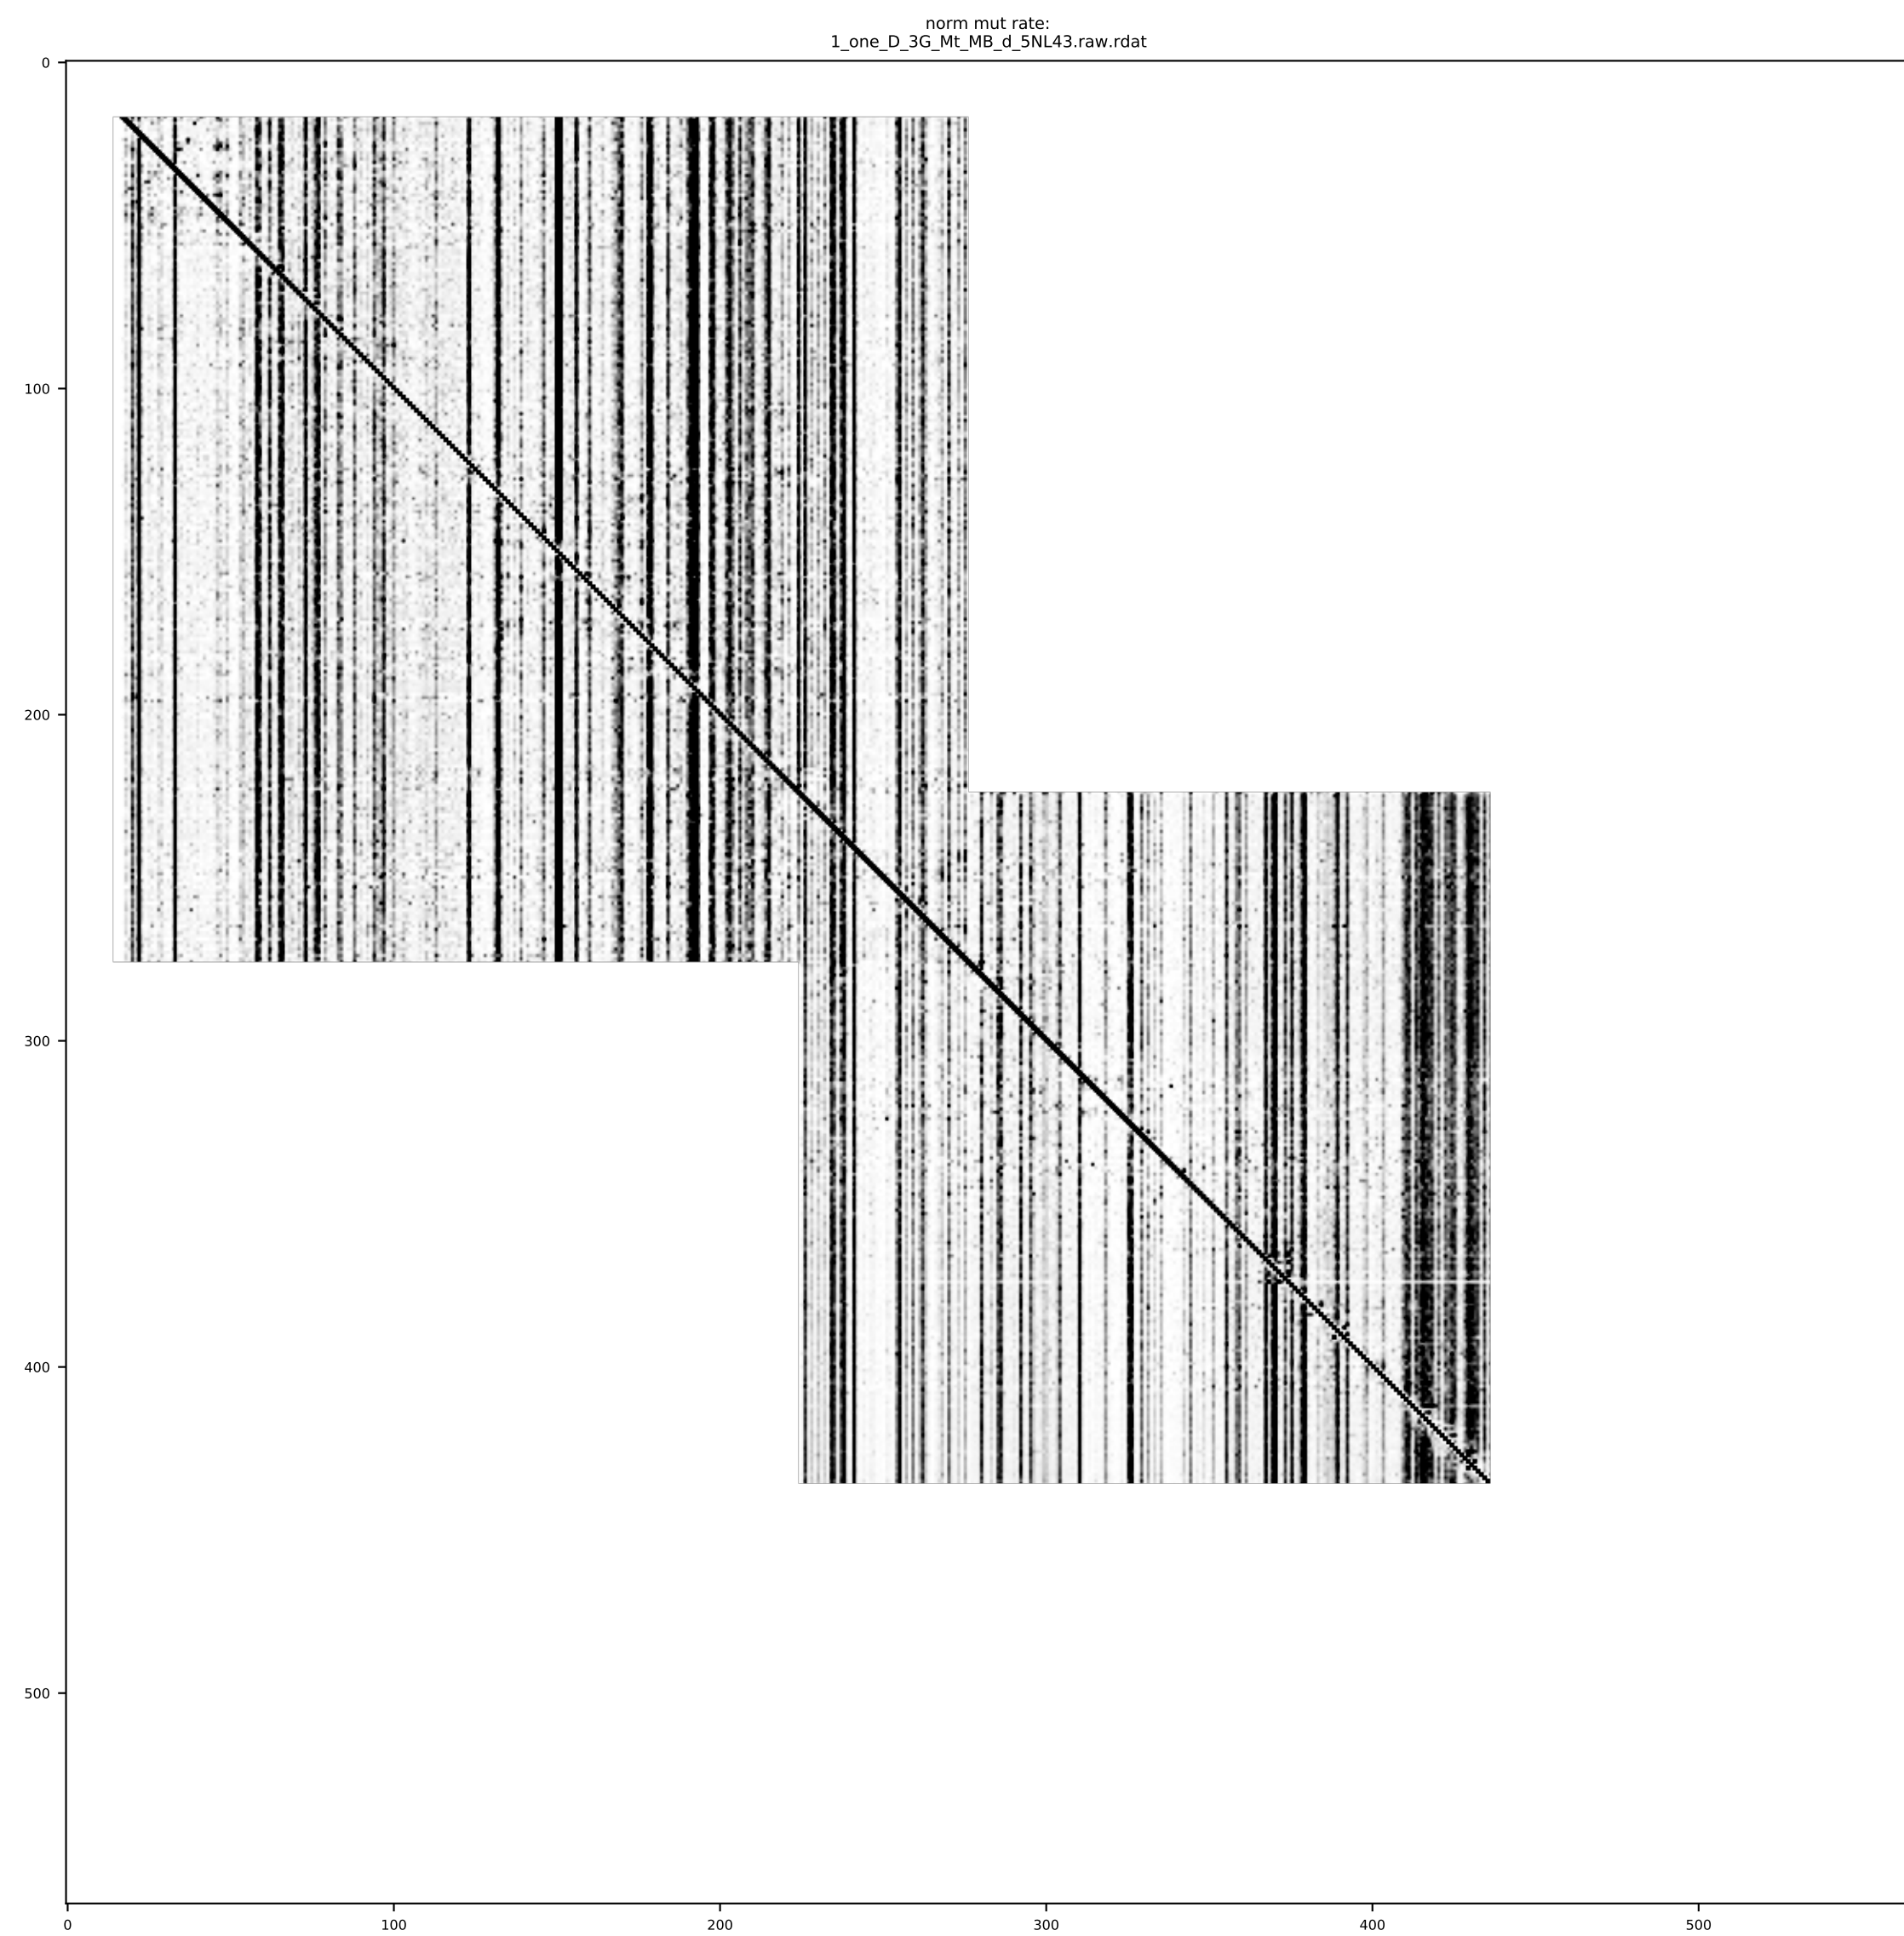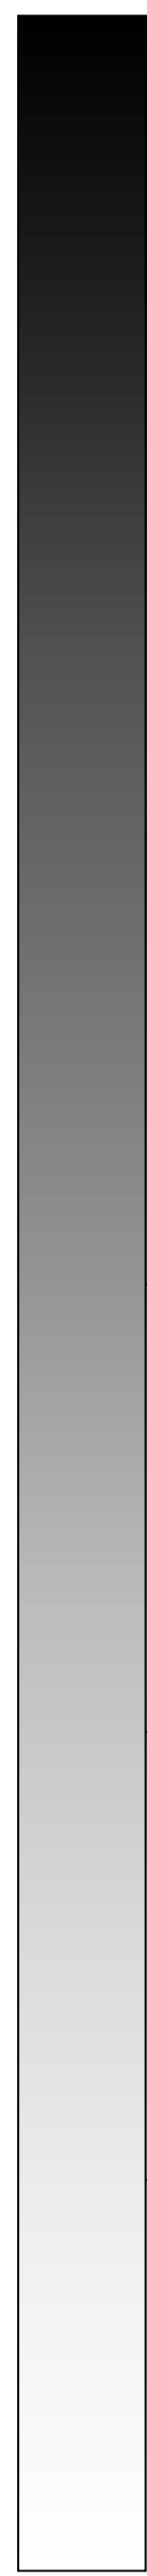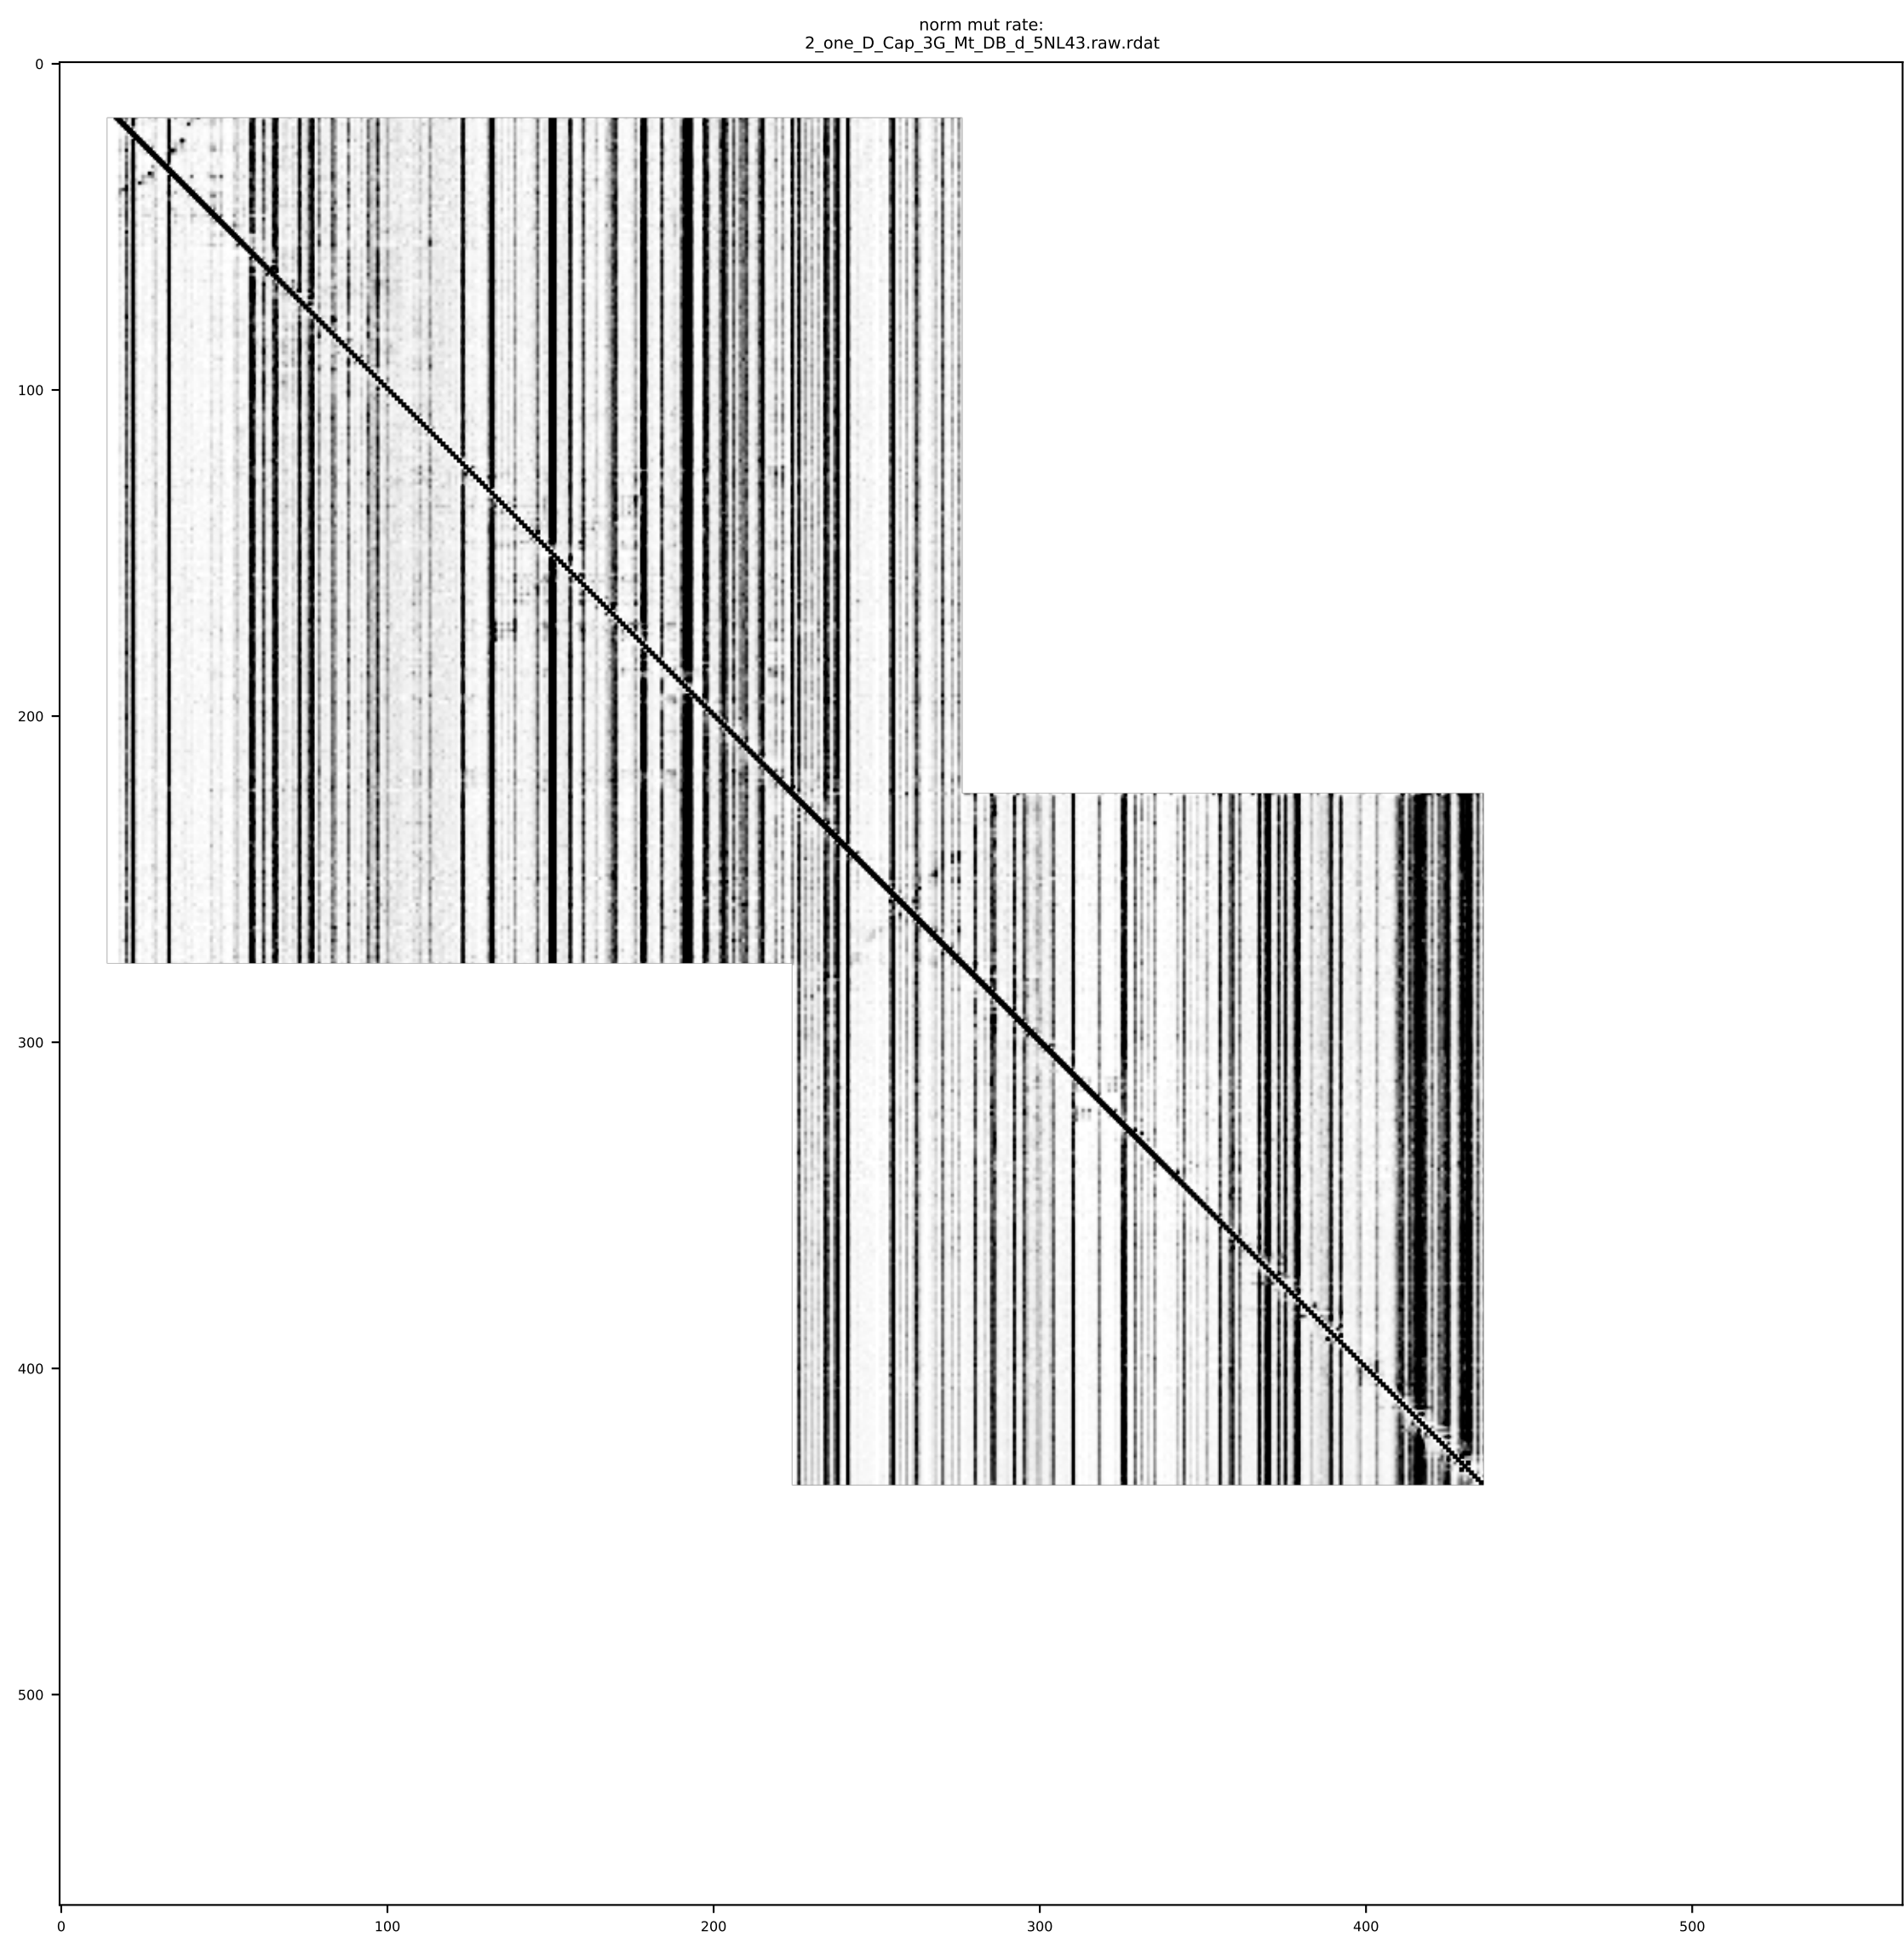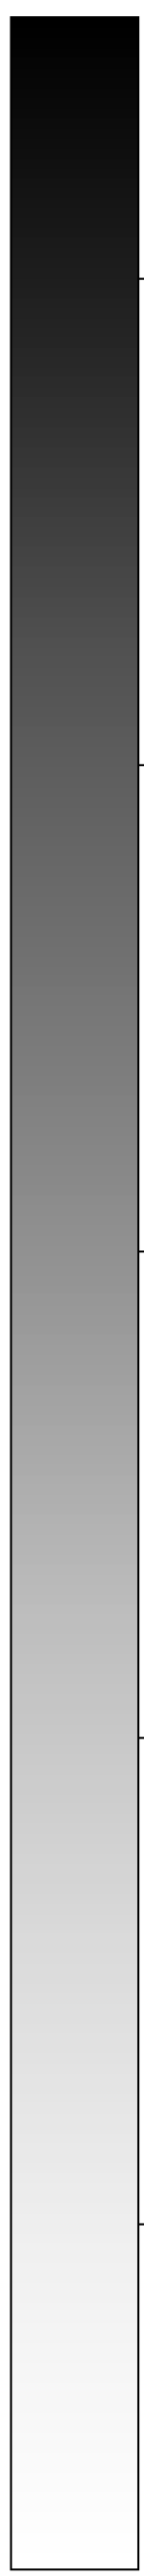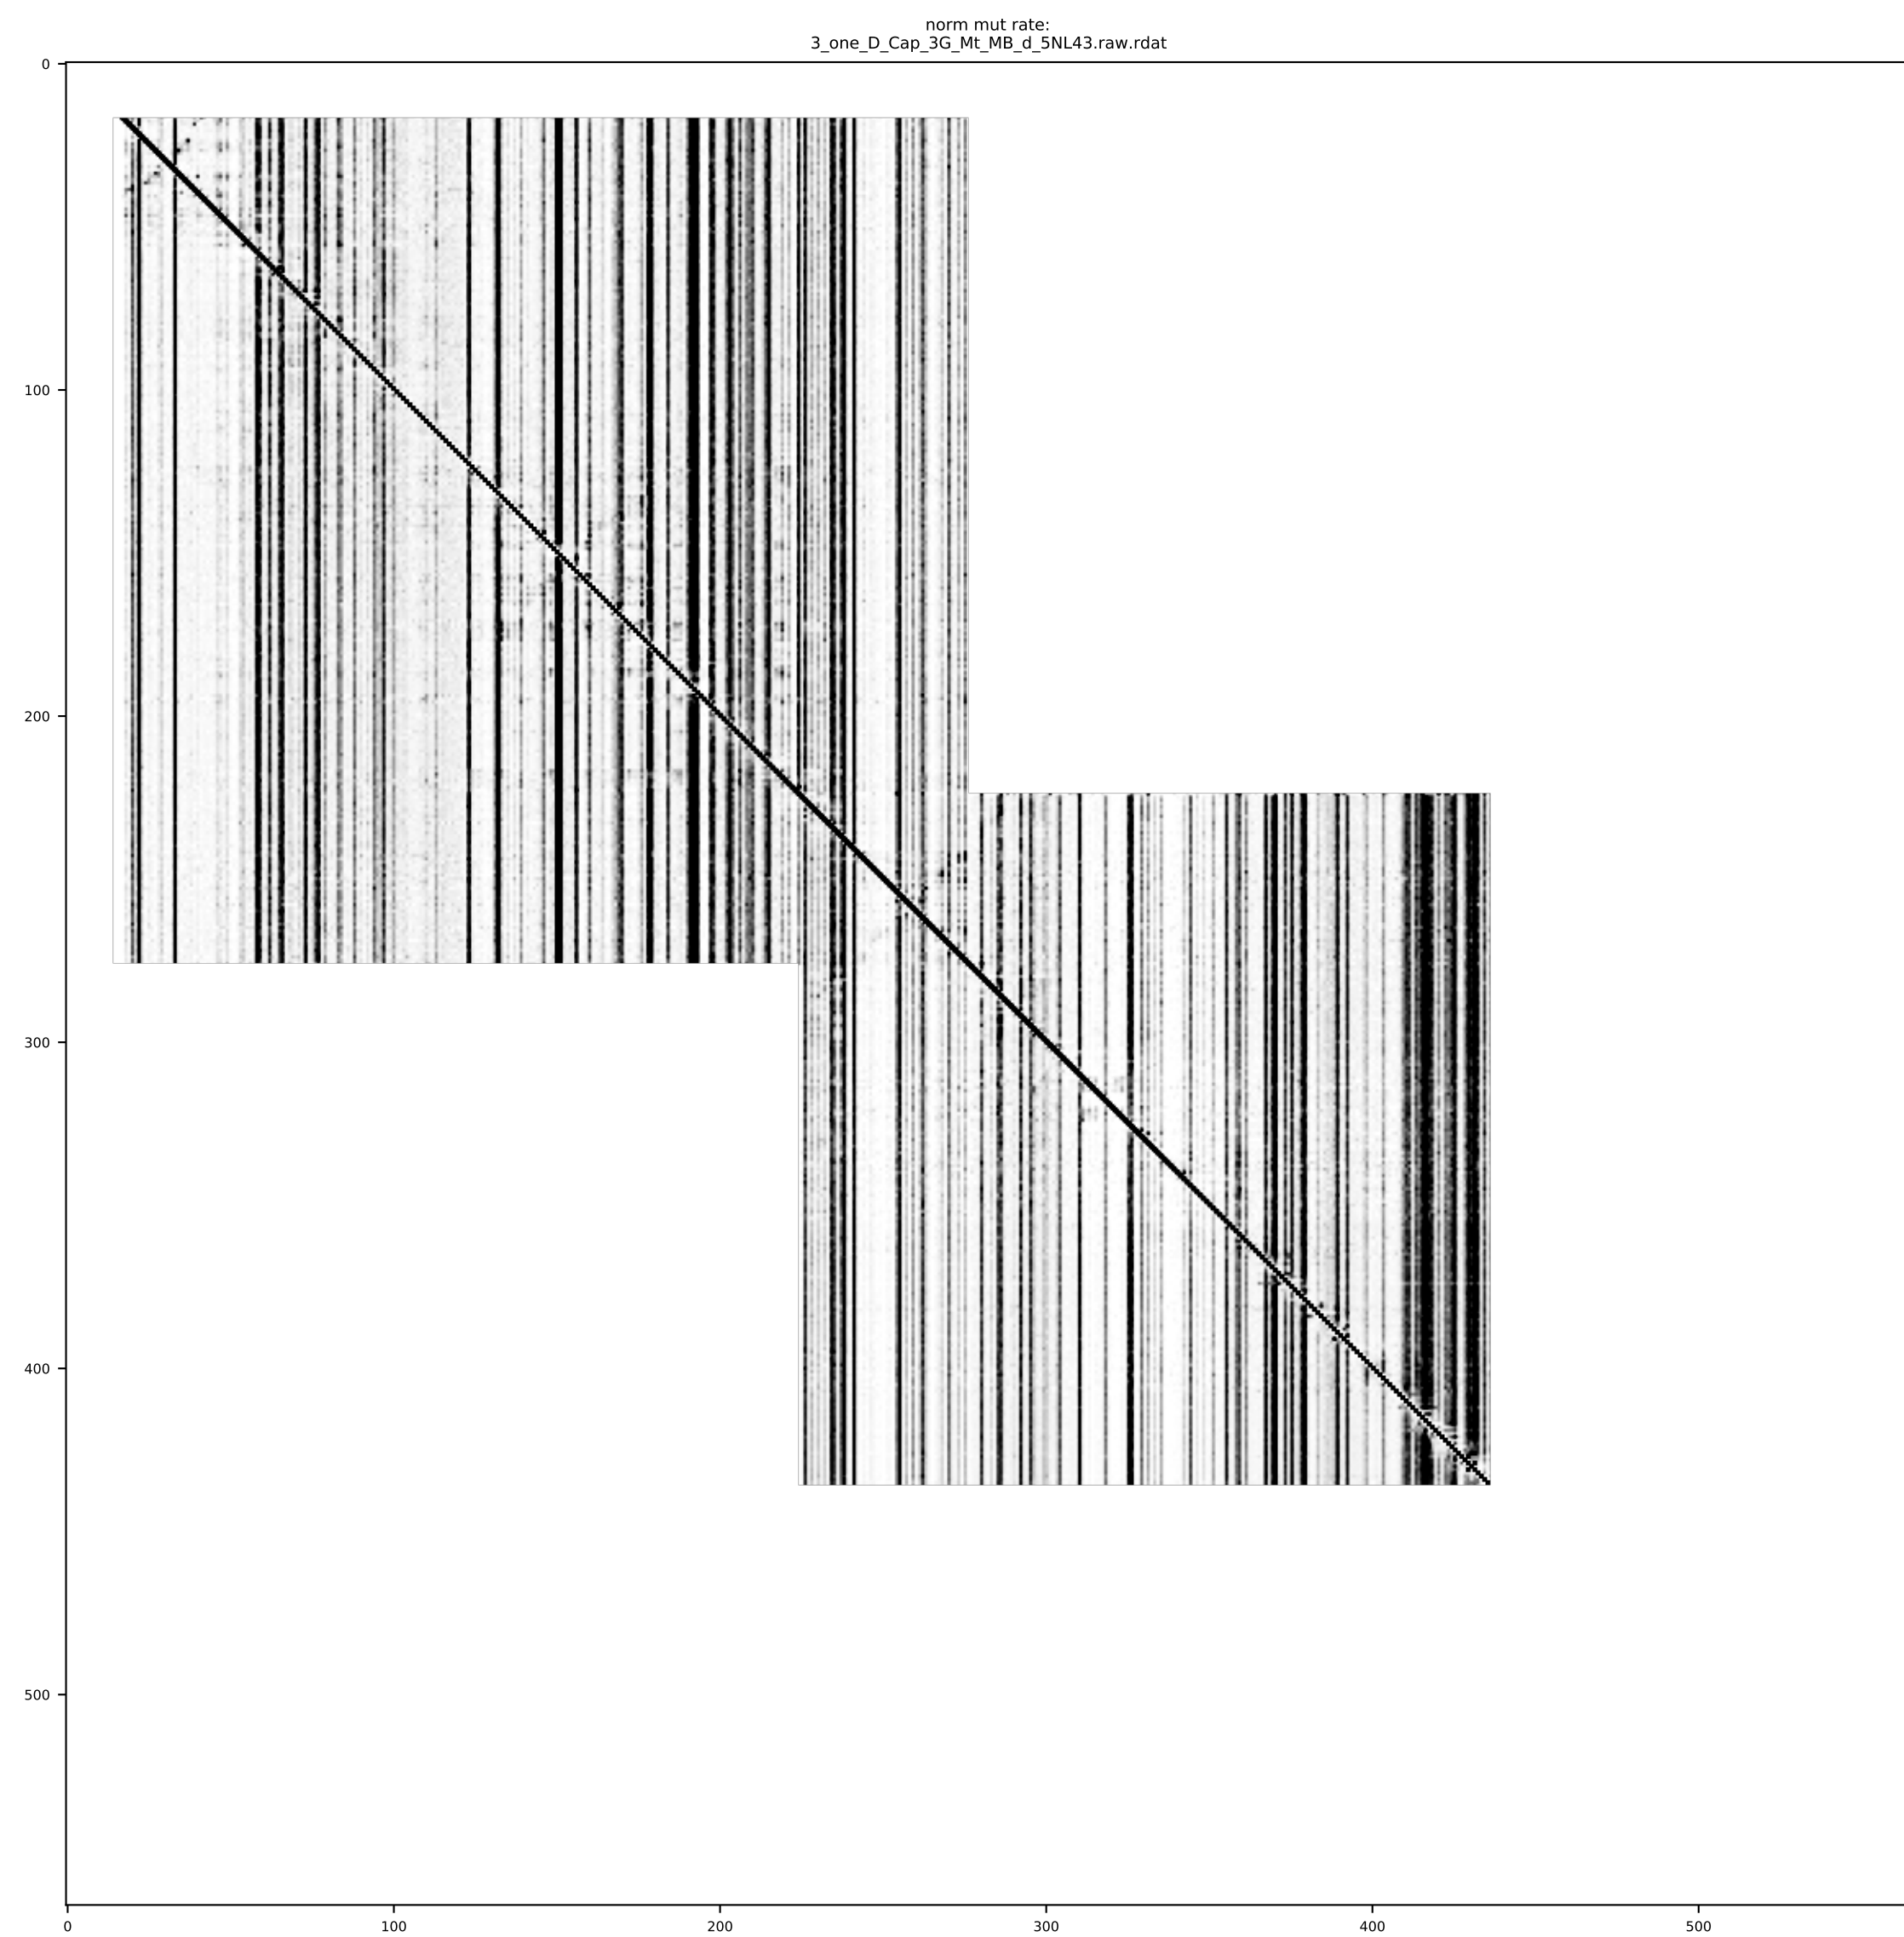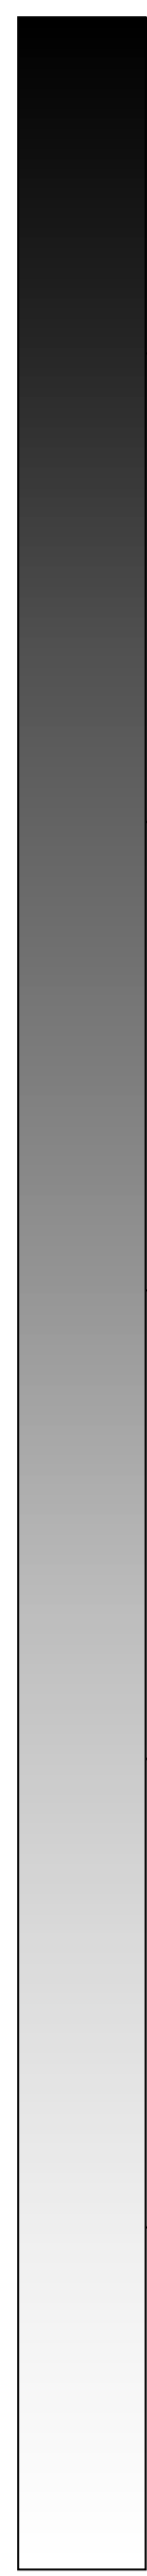

Supplement: Supplementary file 25 [file threeG_dimer_mut_rates.pdf › 2d-structure-inference/mut_rates/threeG_dimer_mut_rates.pdf]

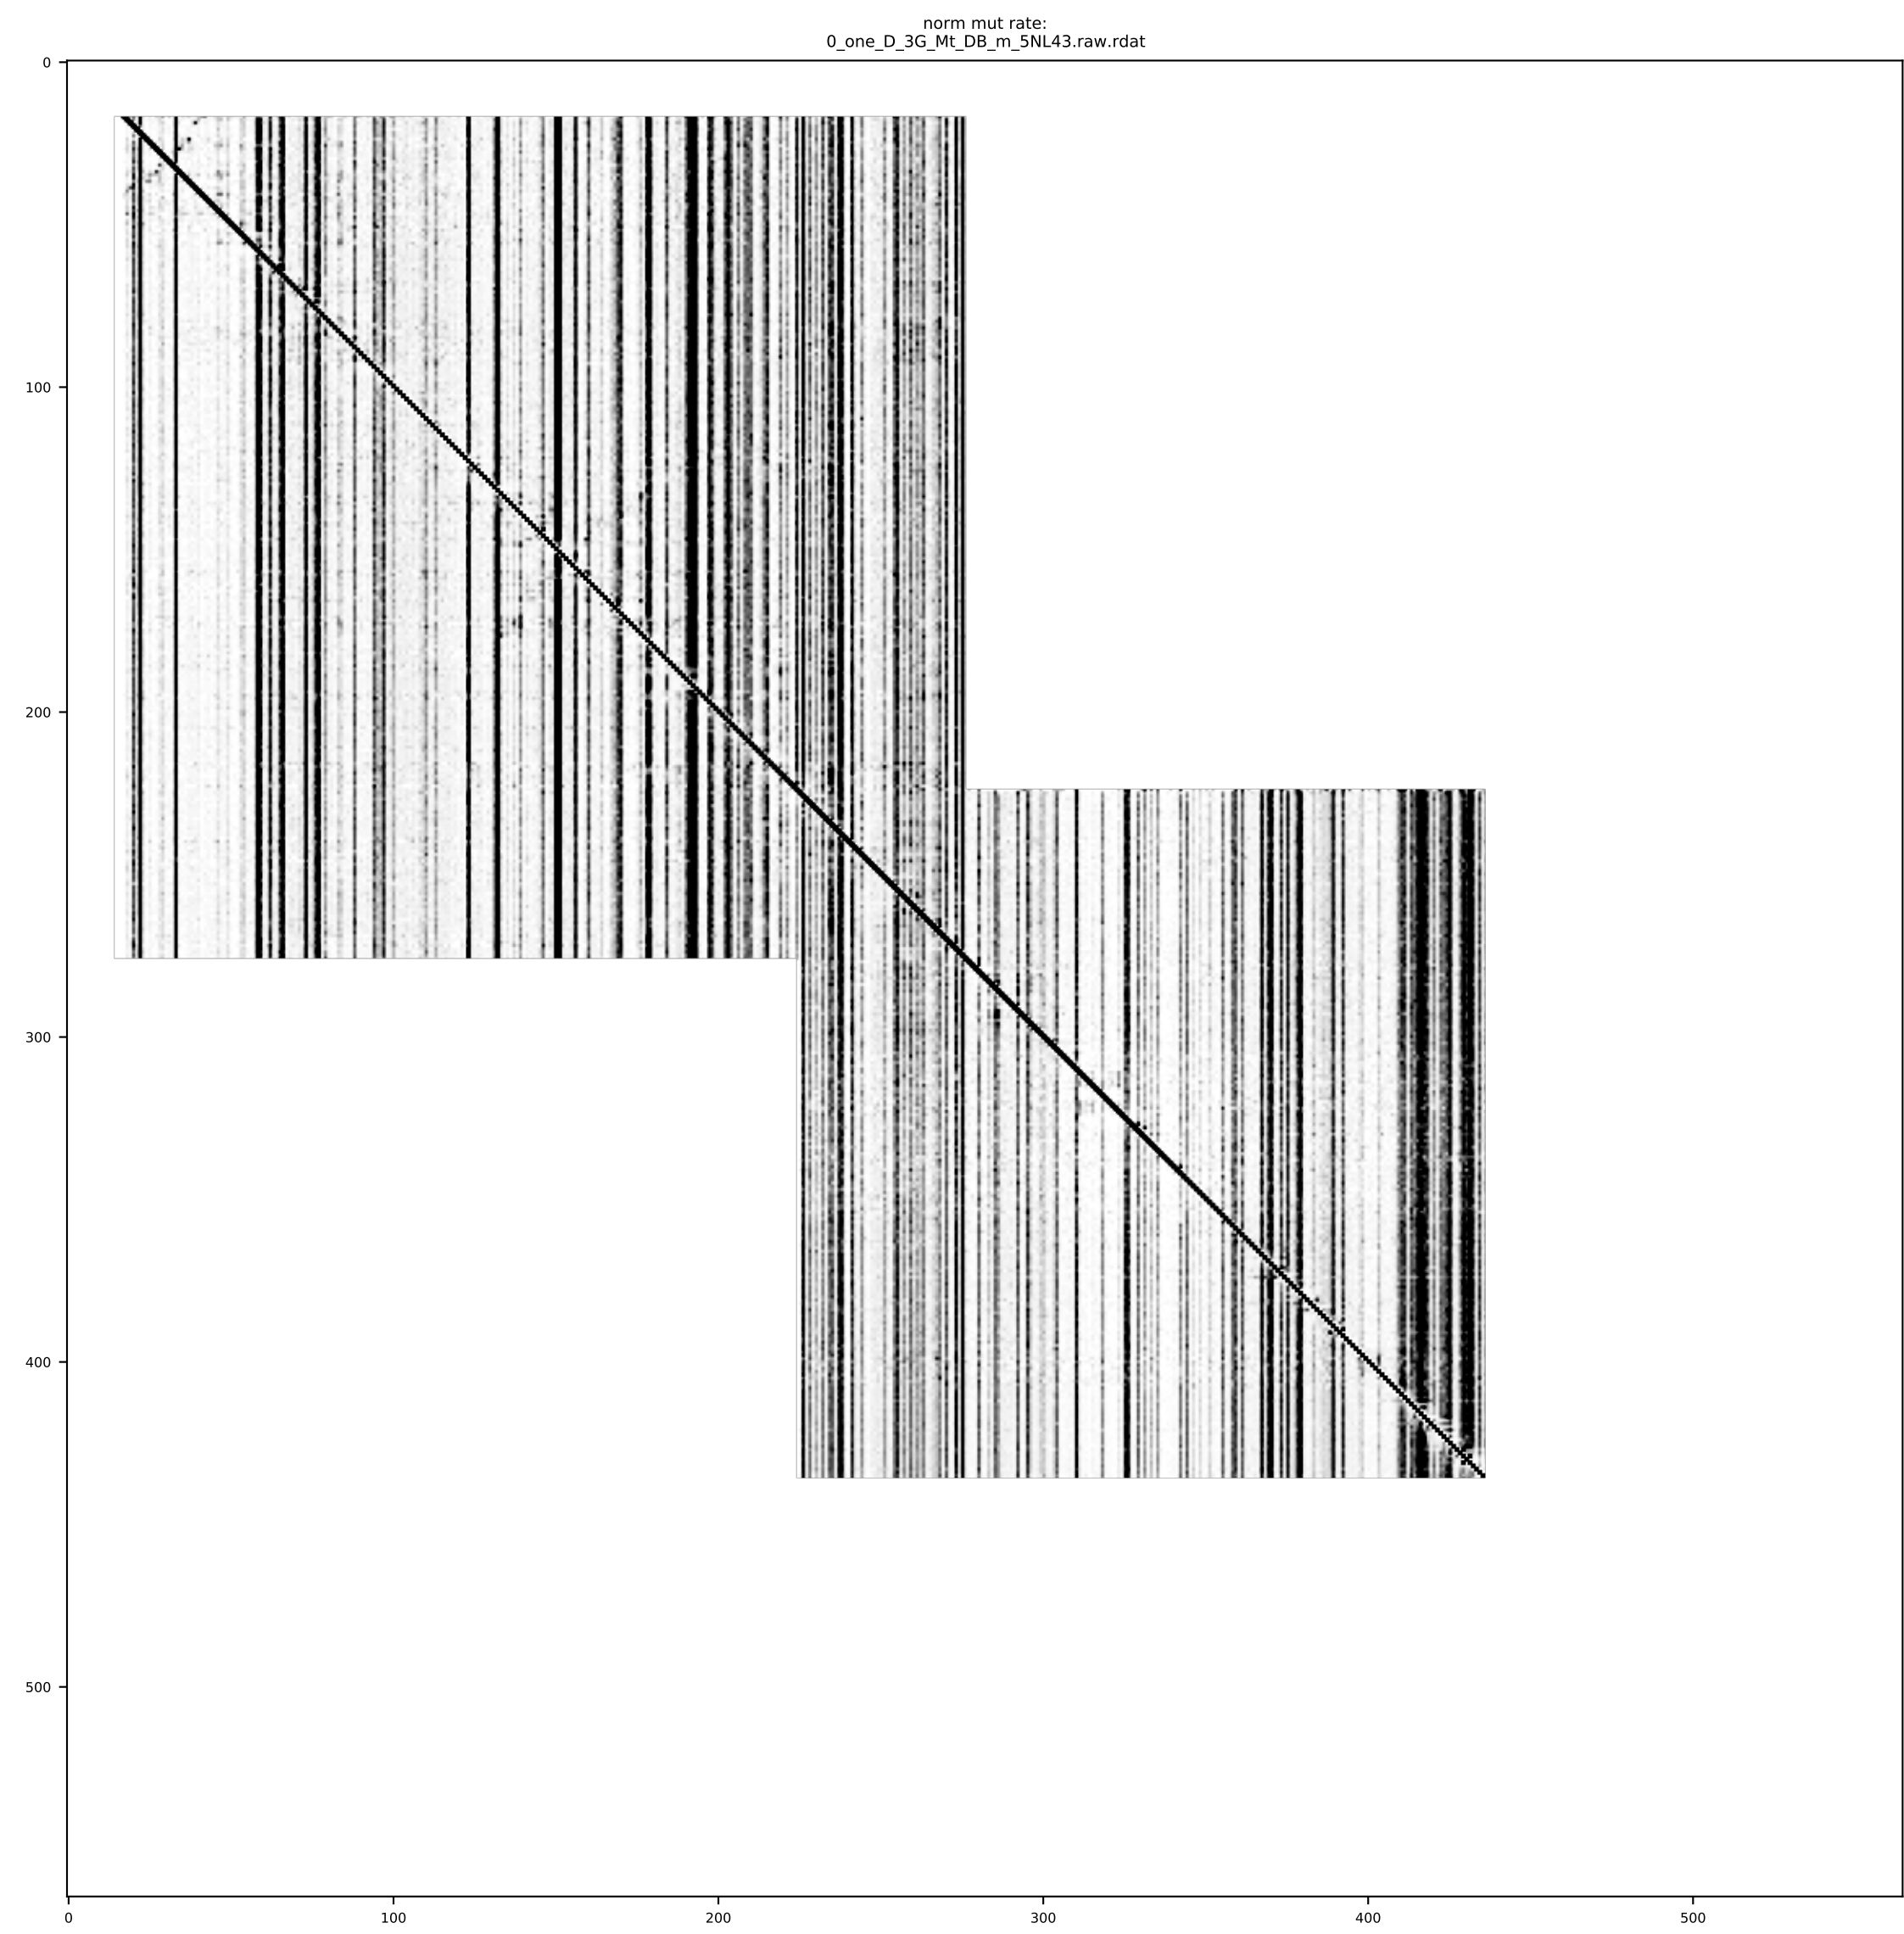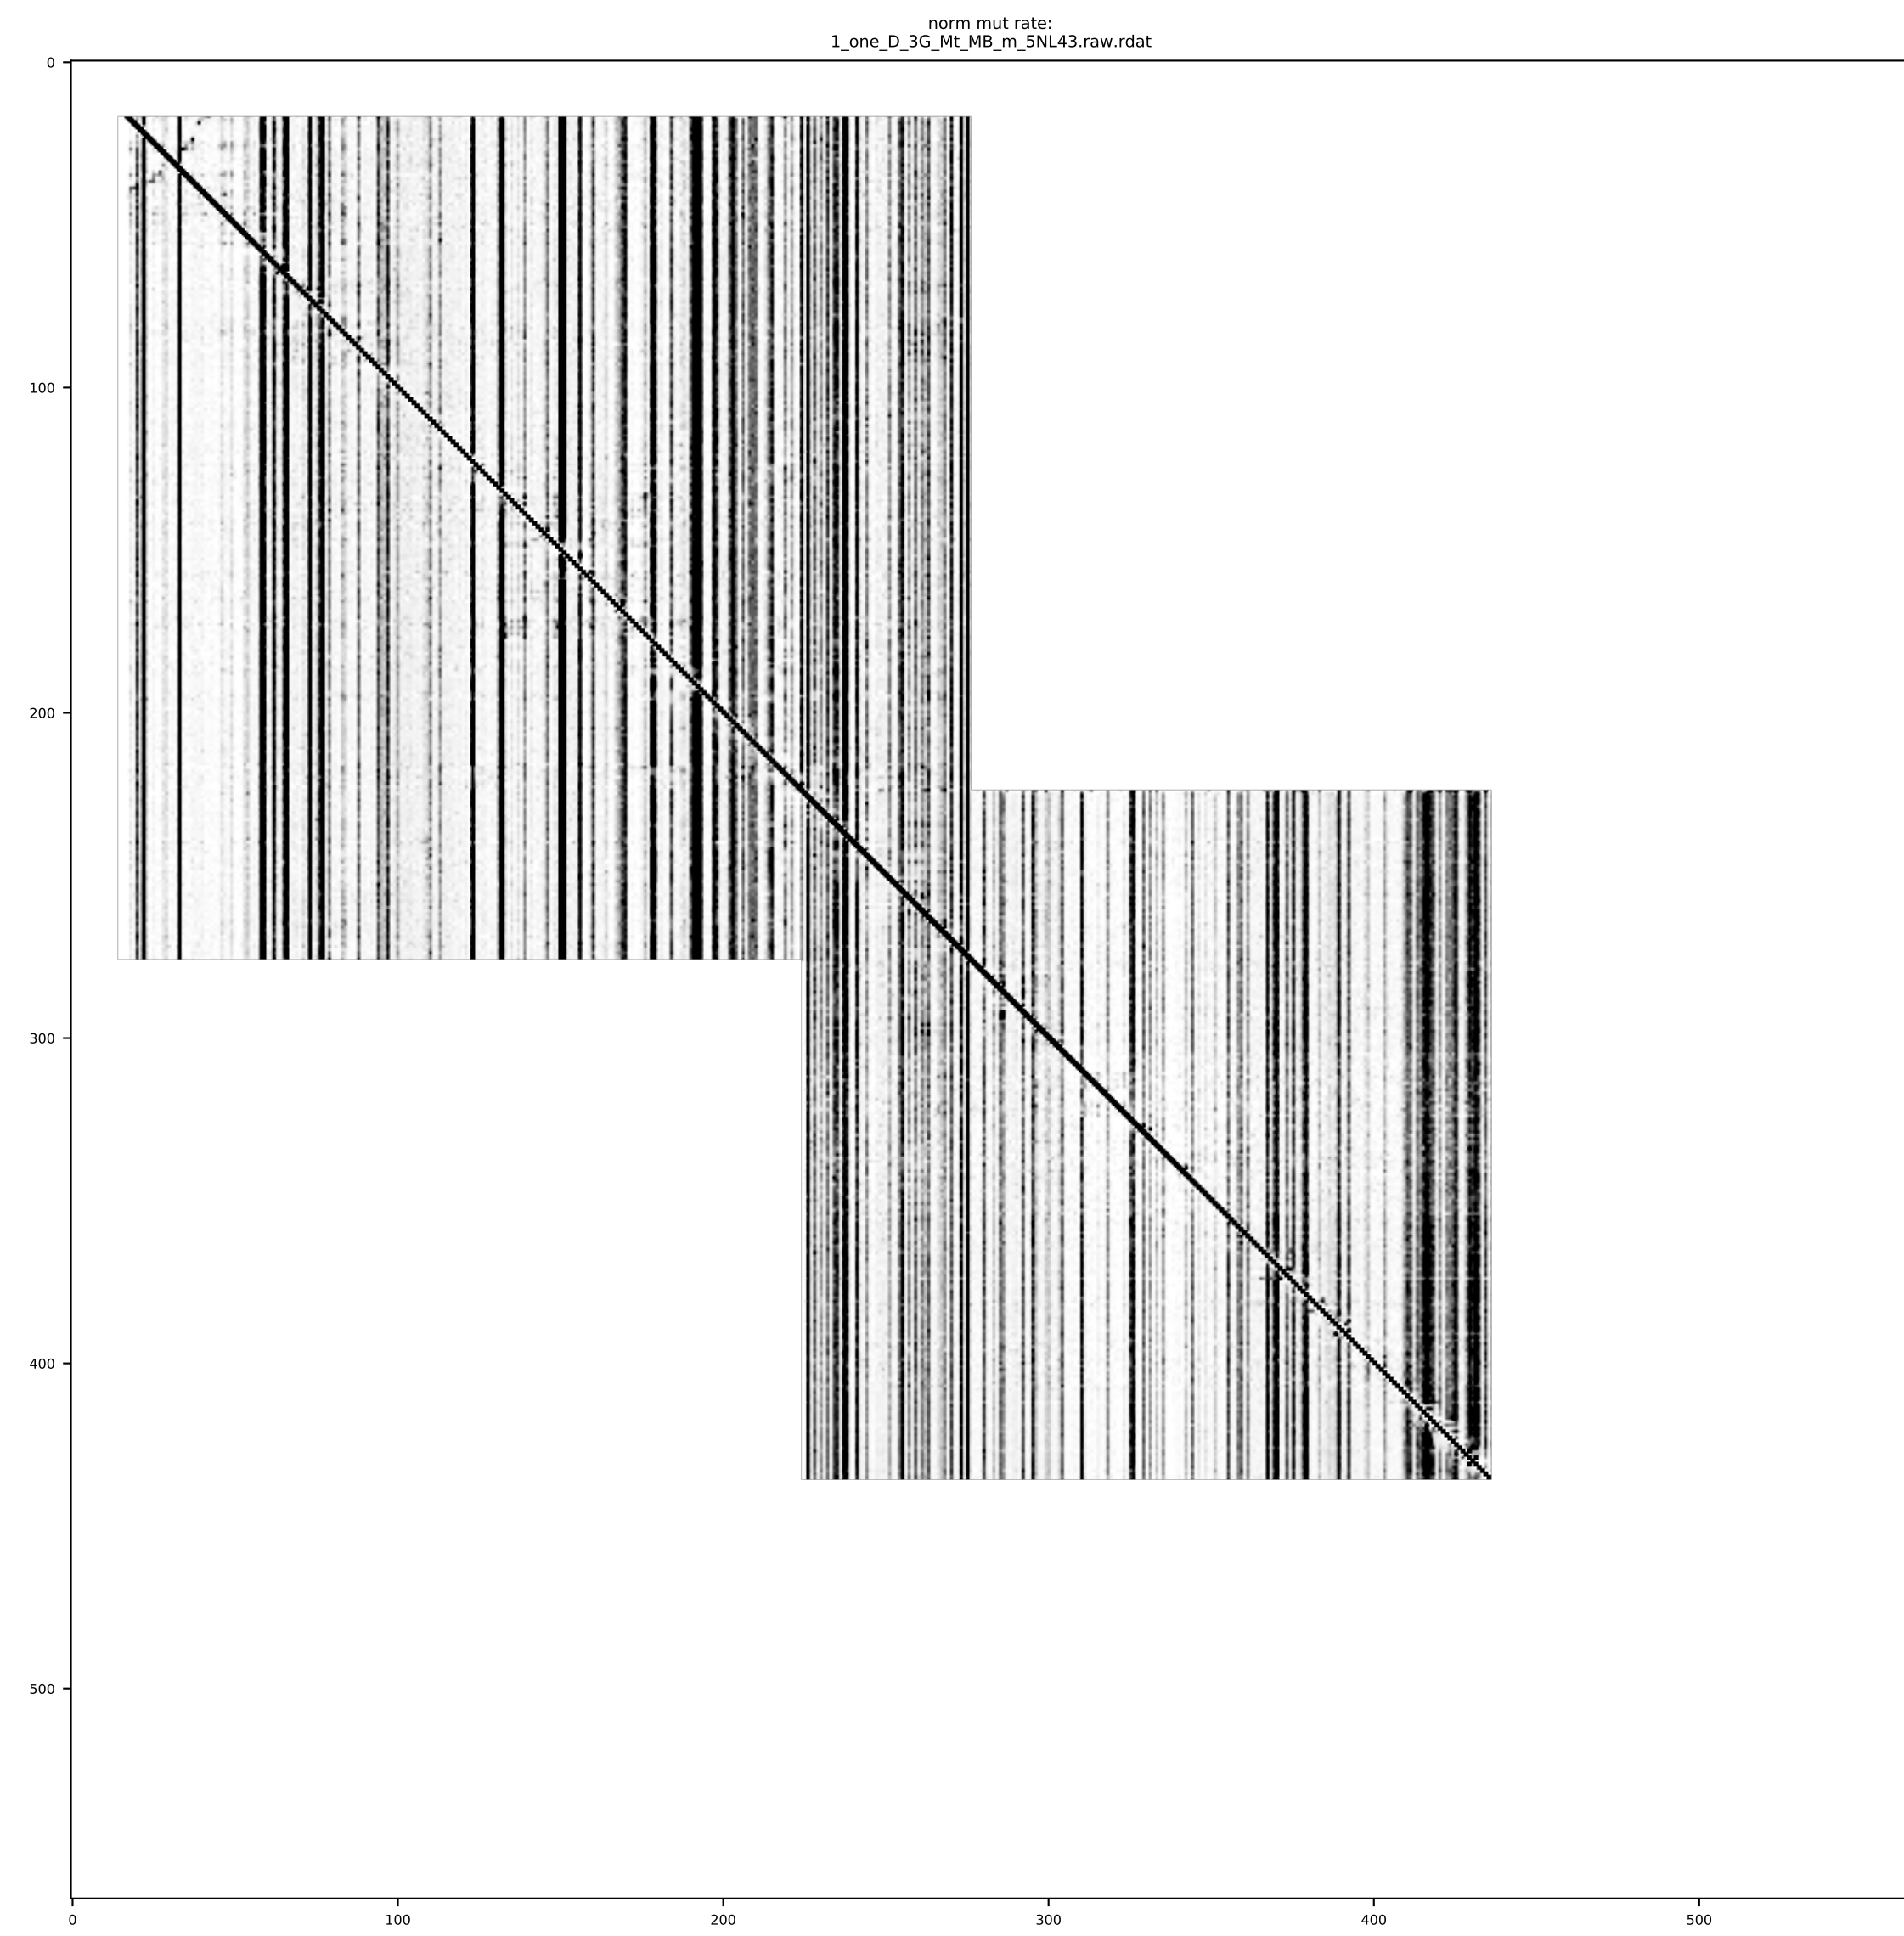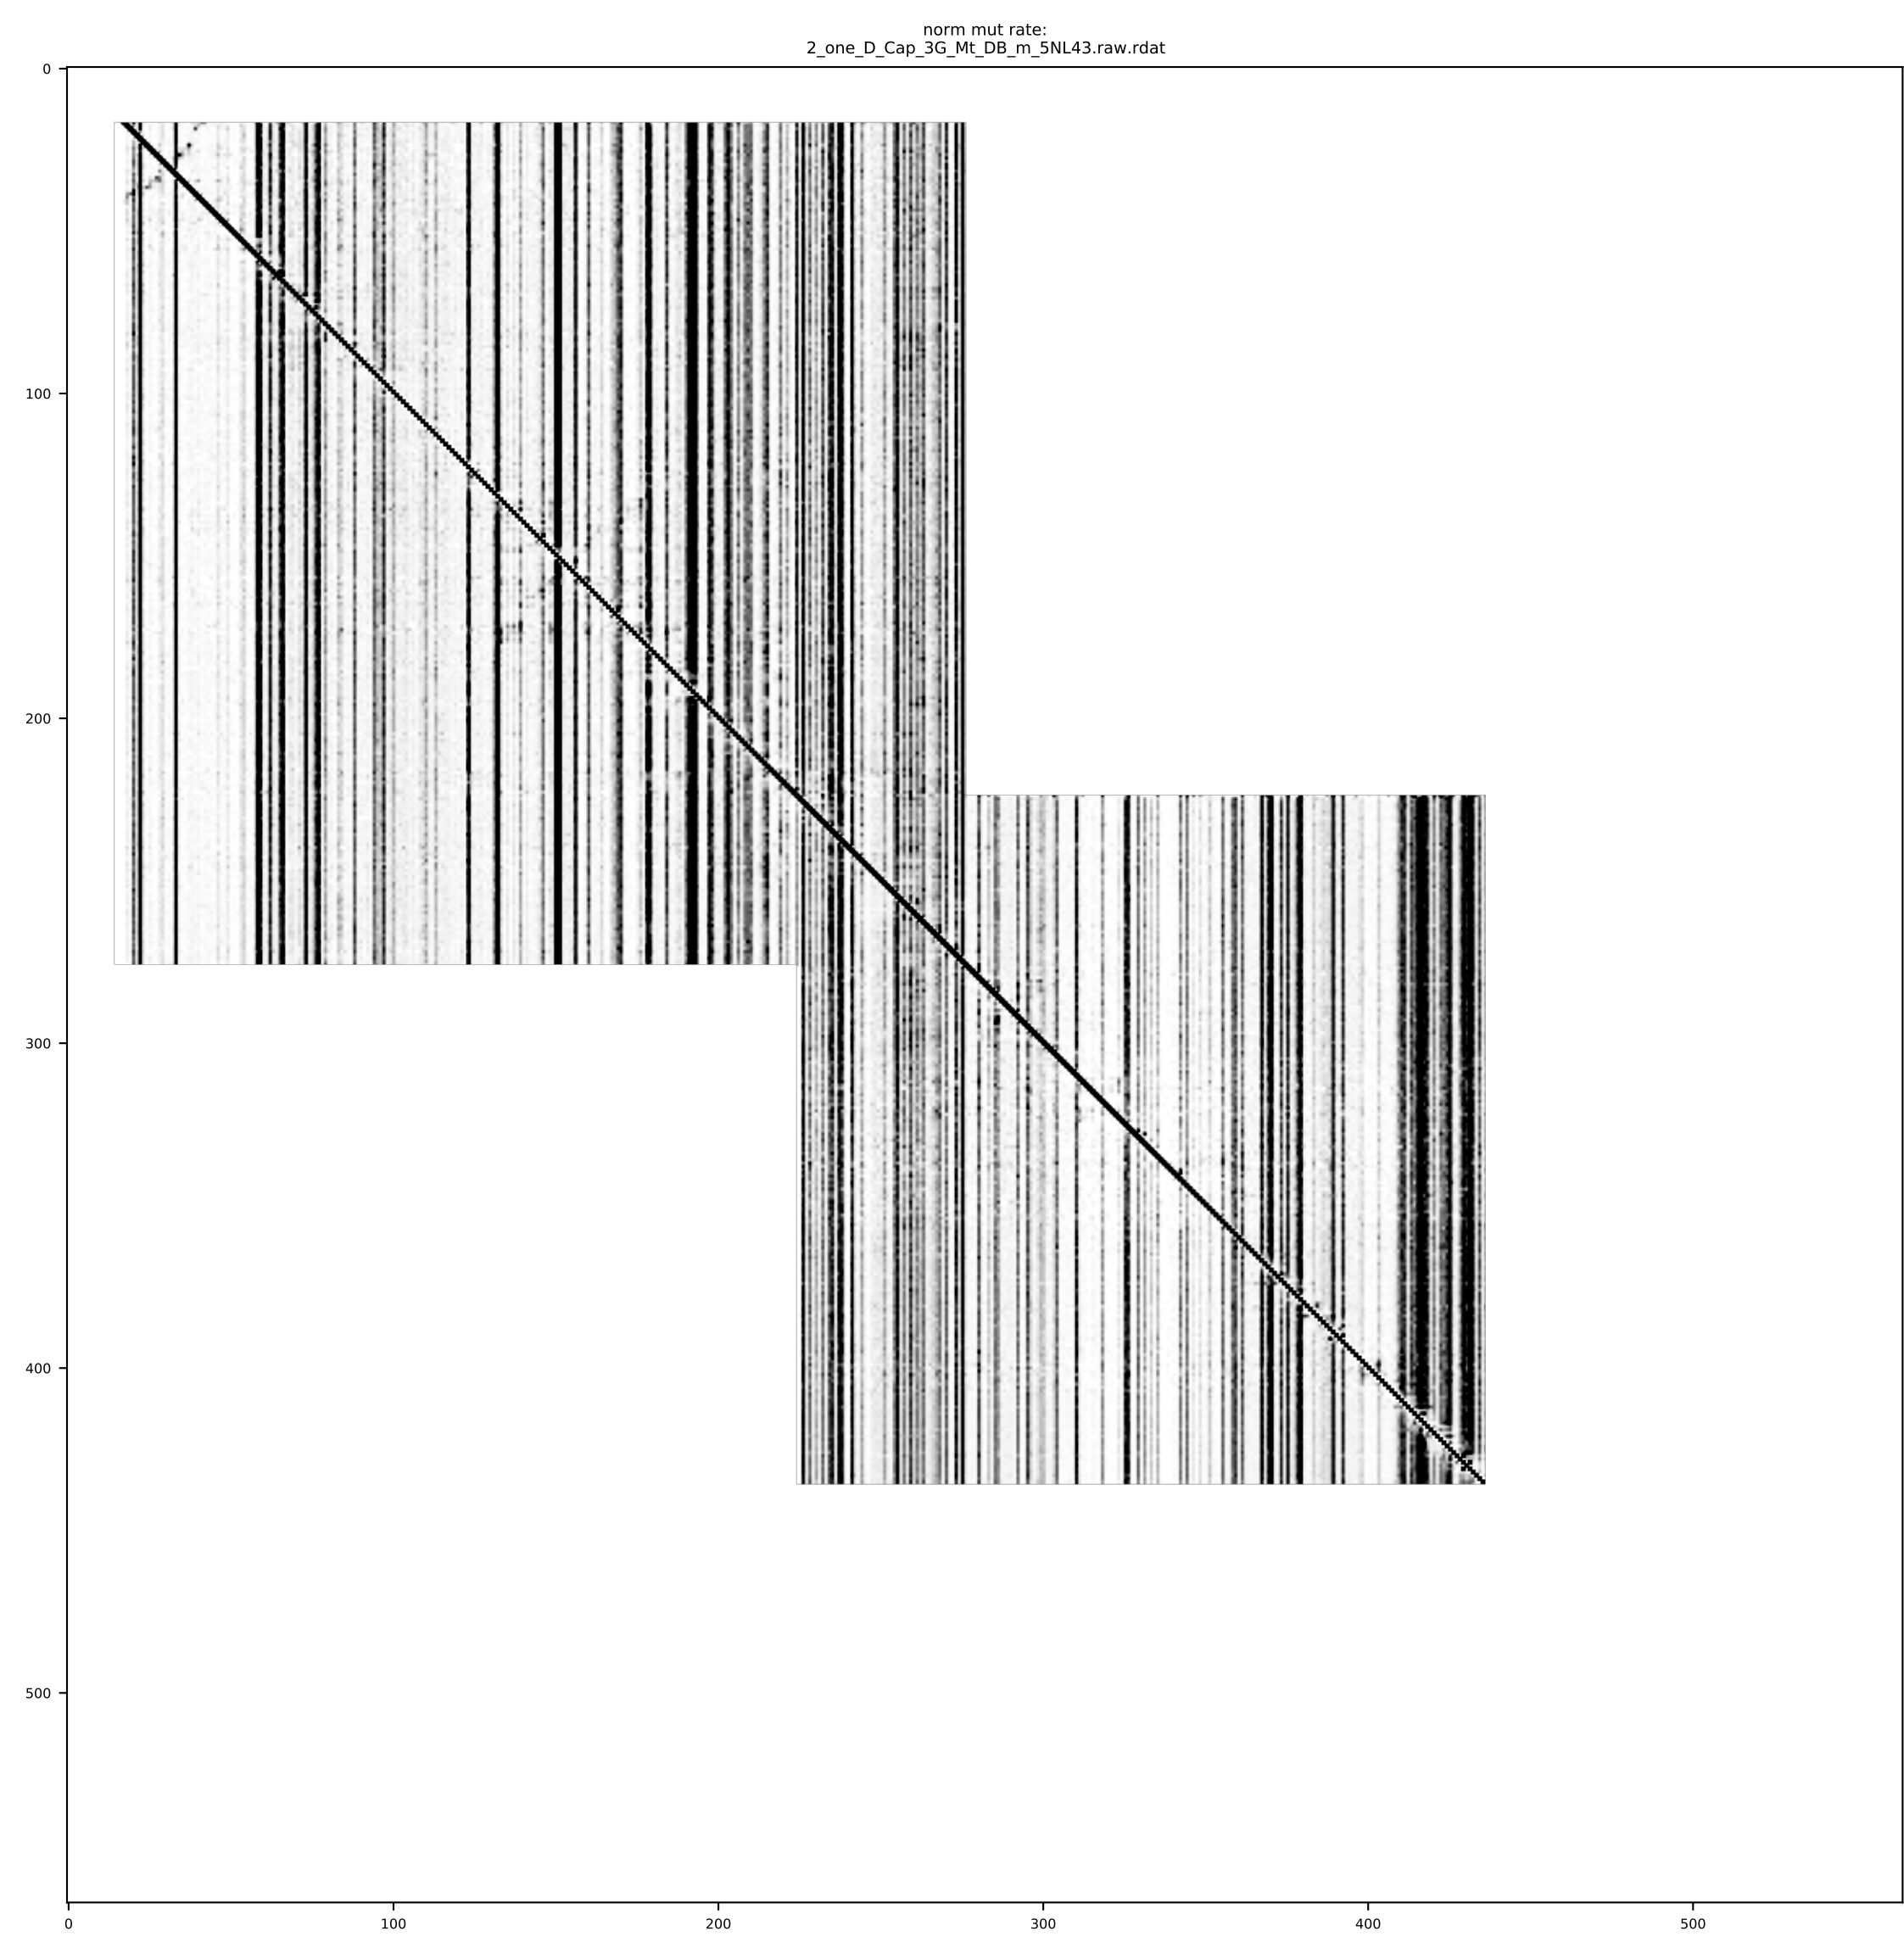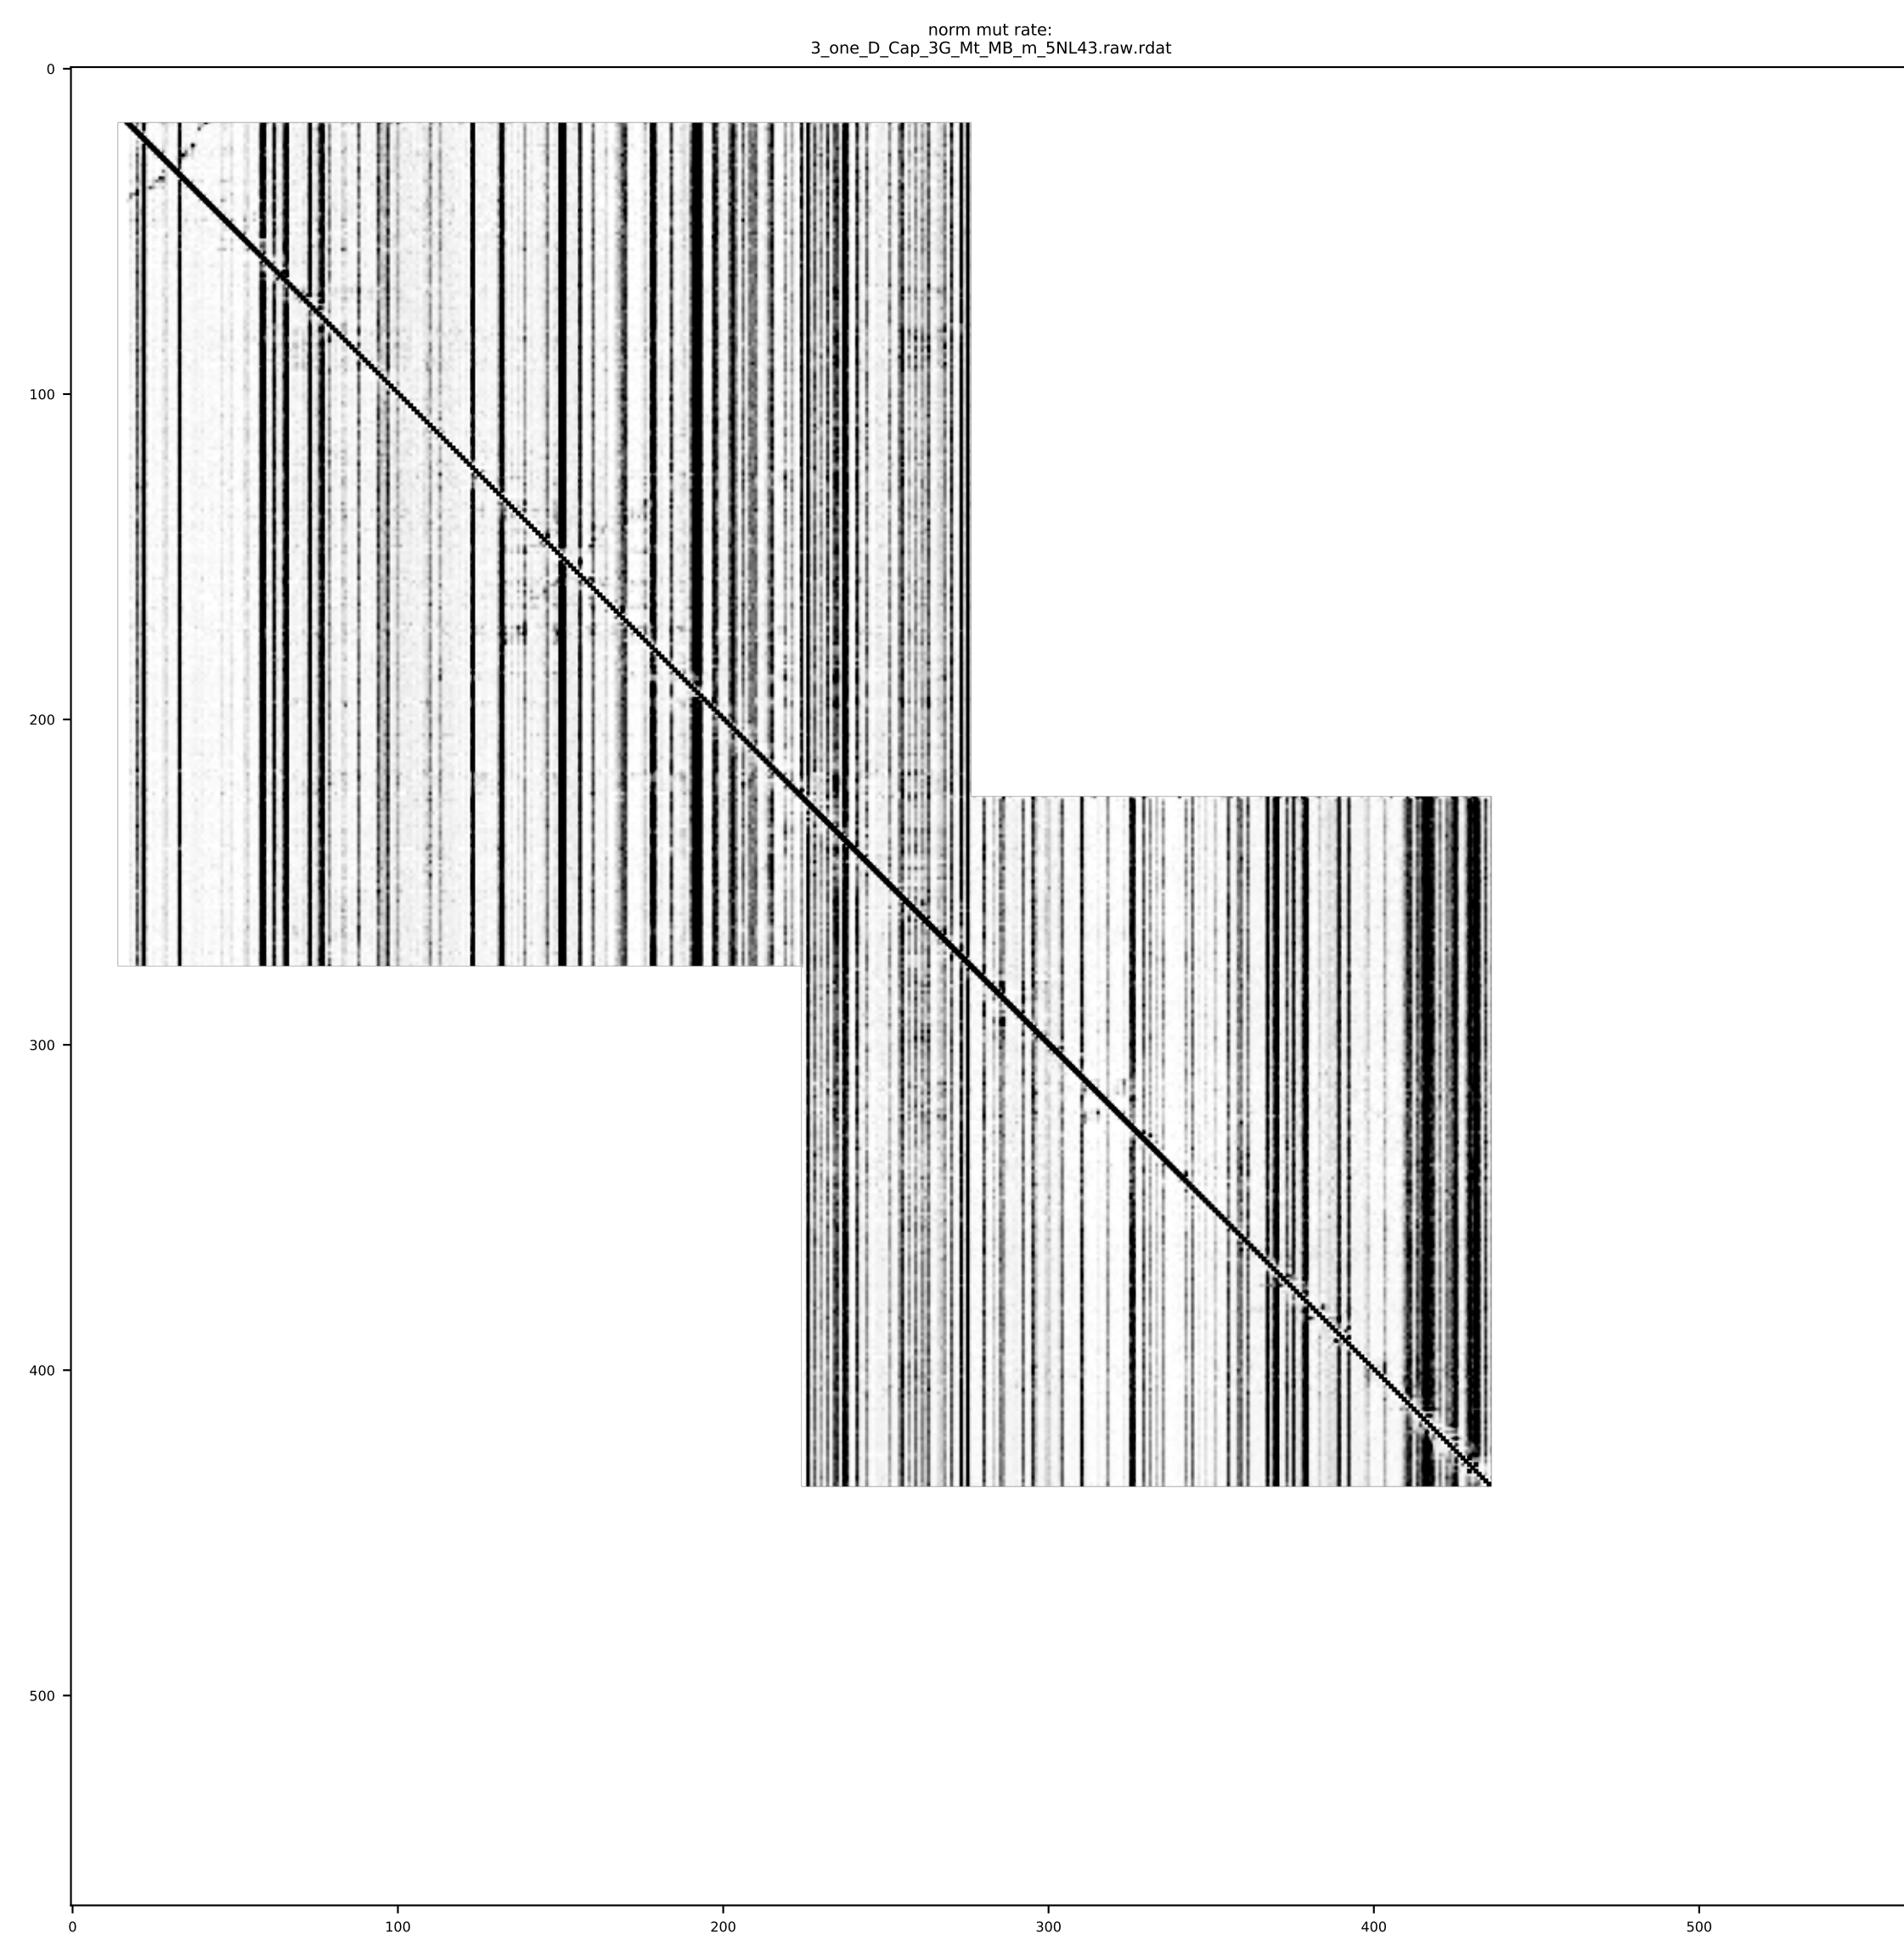

Supplement: Supplementary file 26 [file threeG_monomer_mut_rates.pdf › 2d-structure-inference/mut_rates/threeG_monomer_mut_rates.pdf]

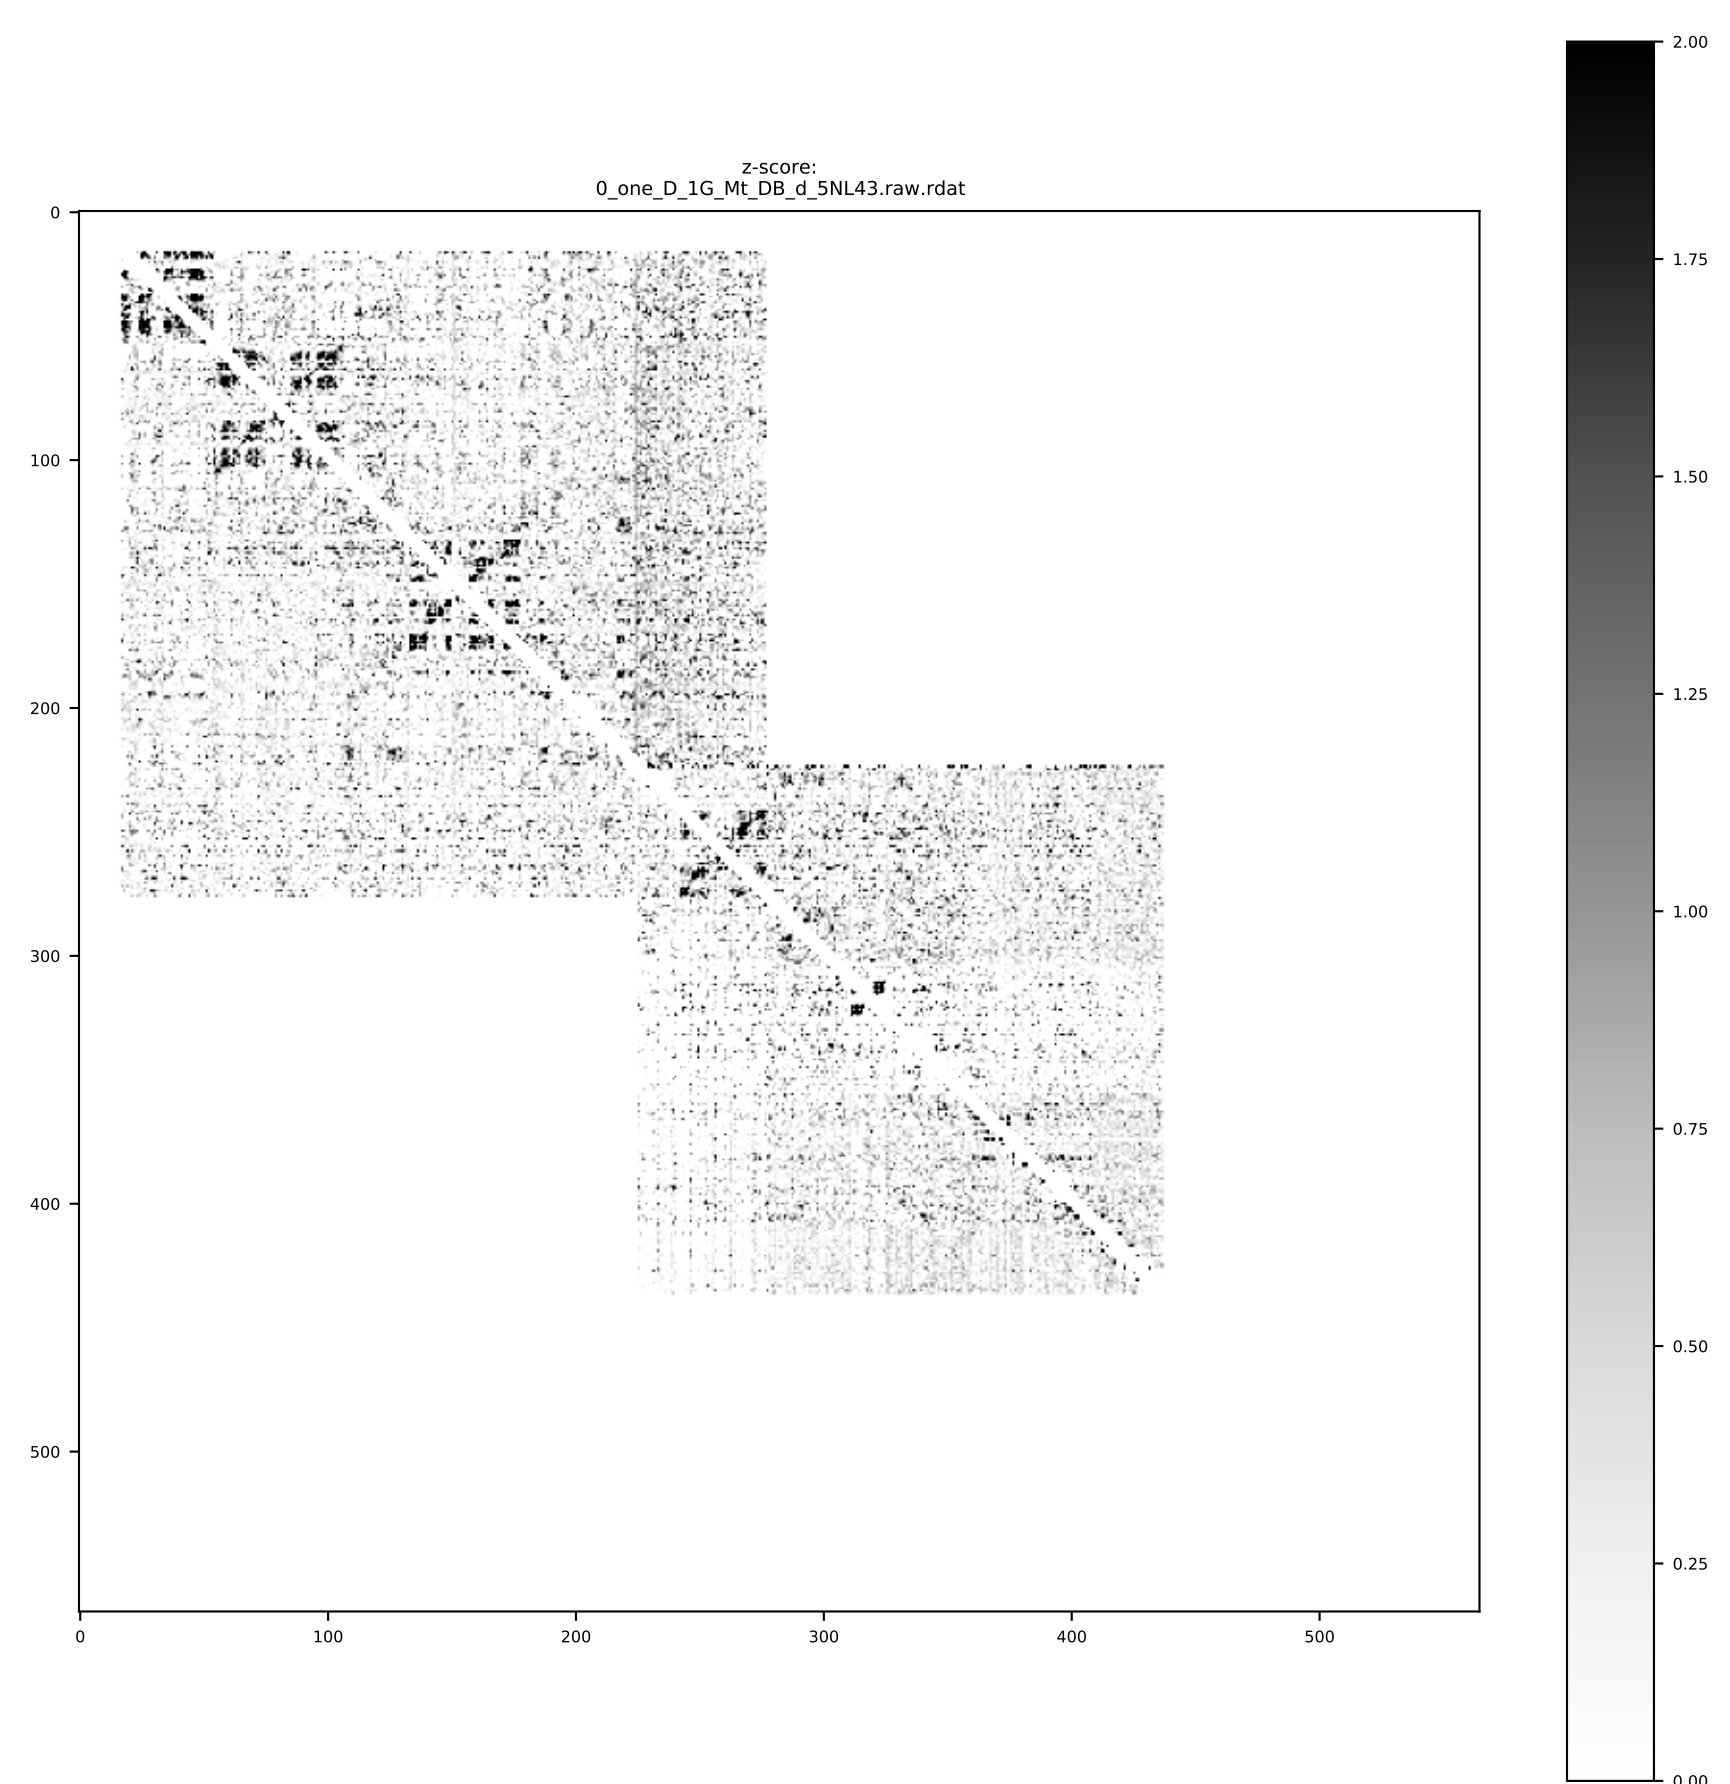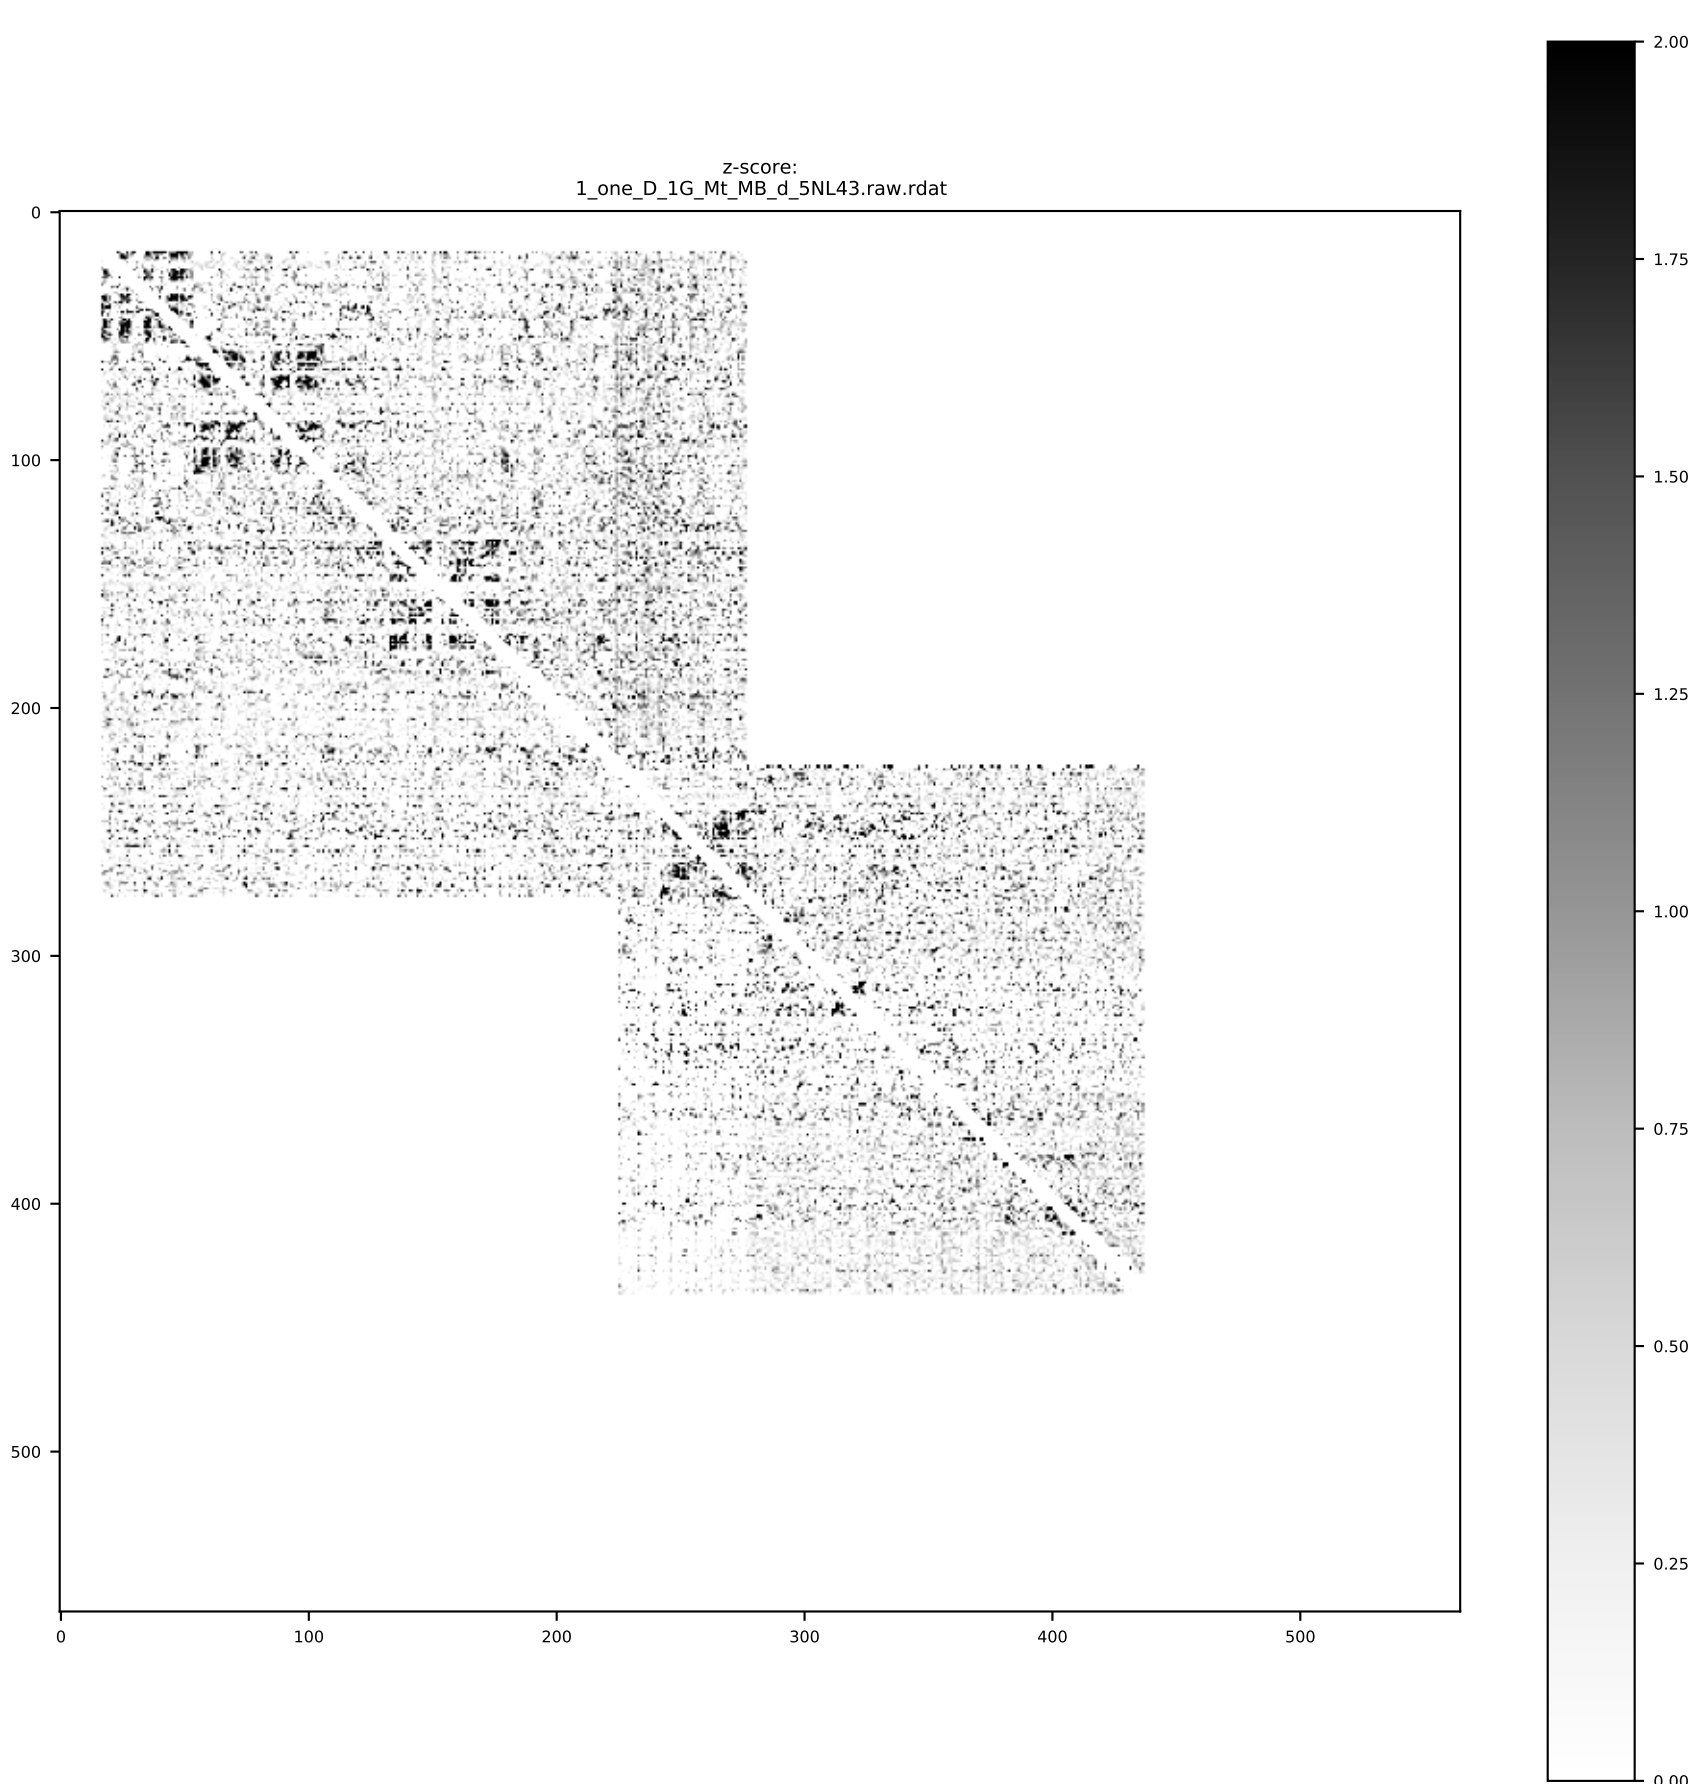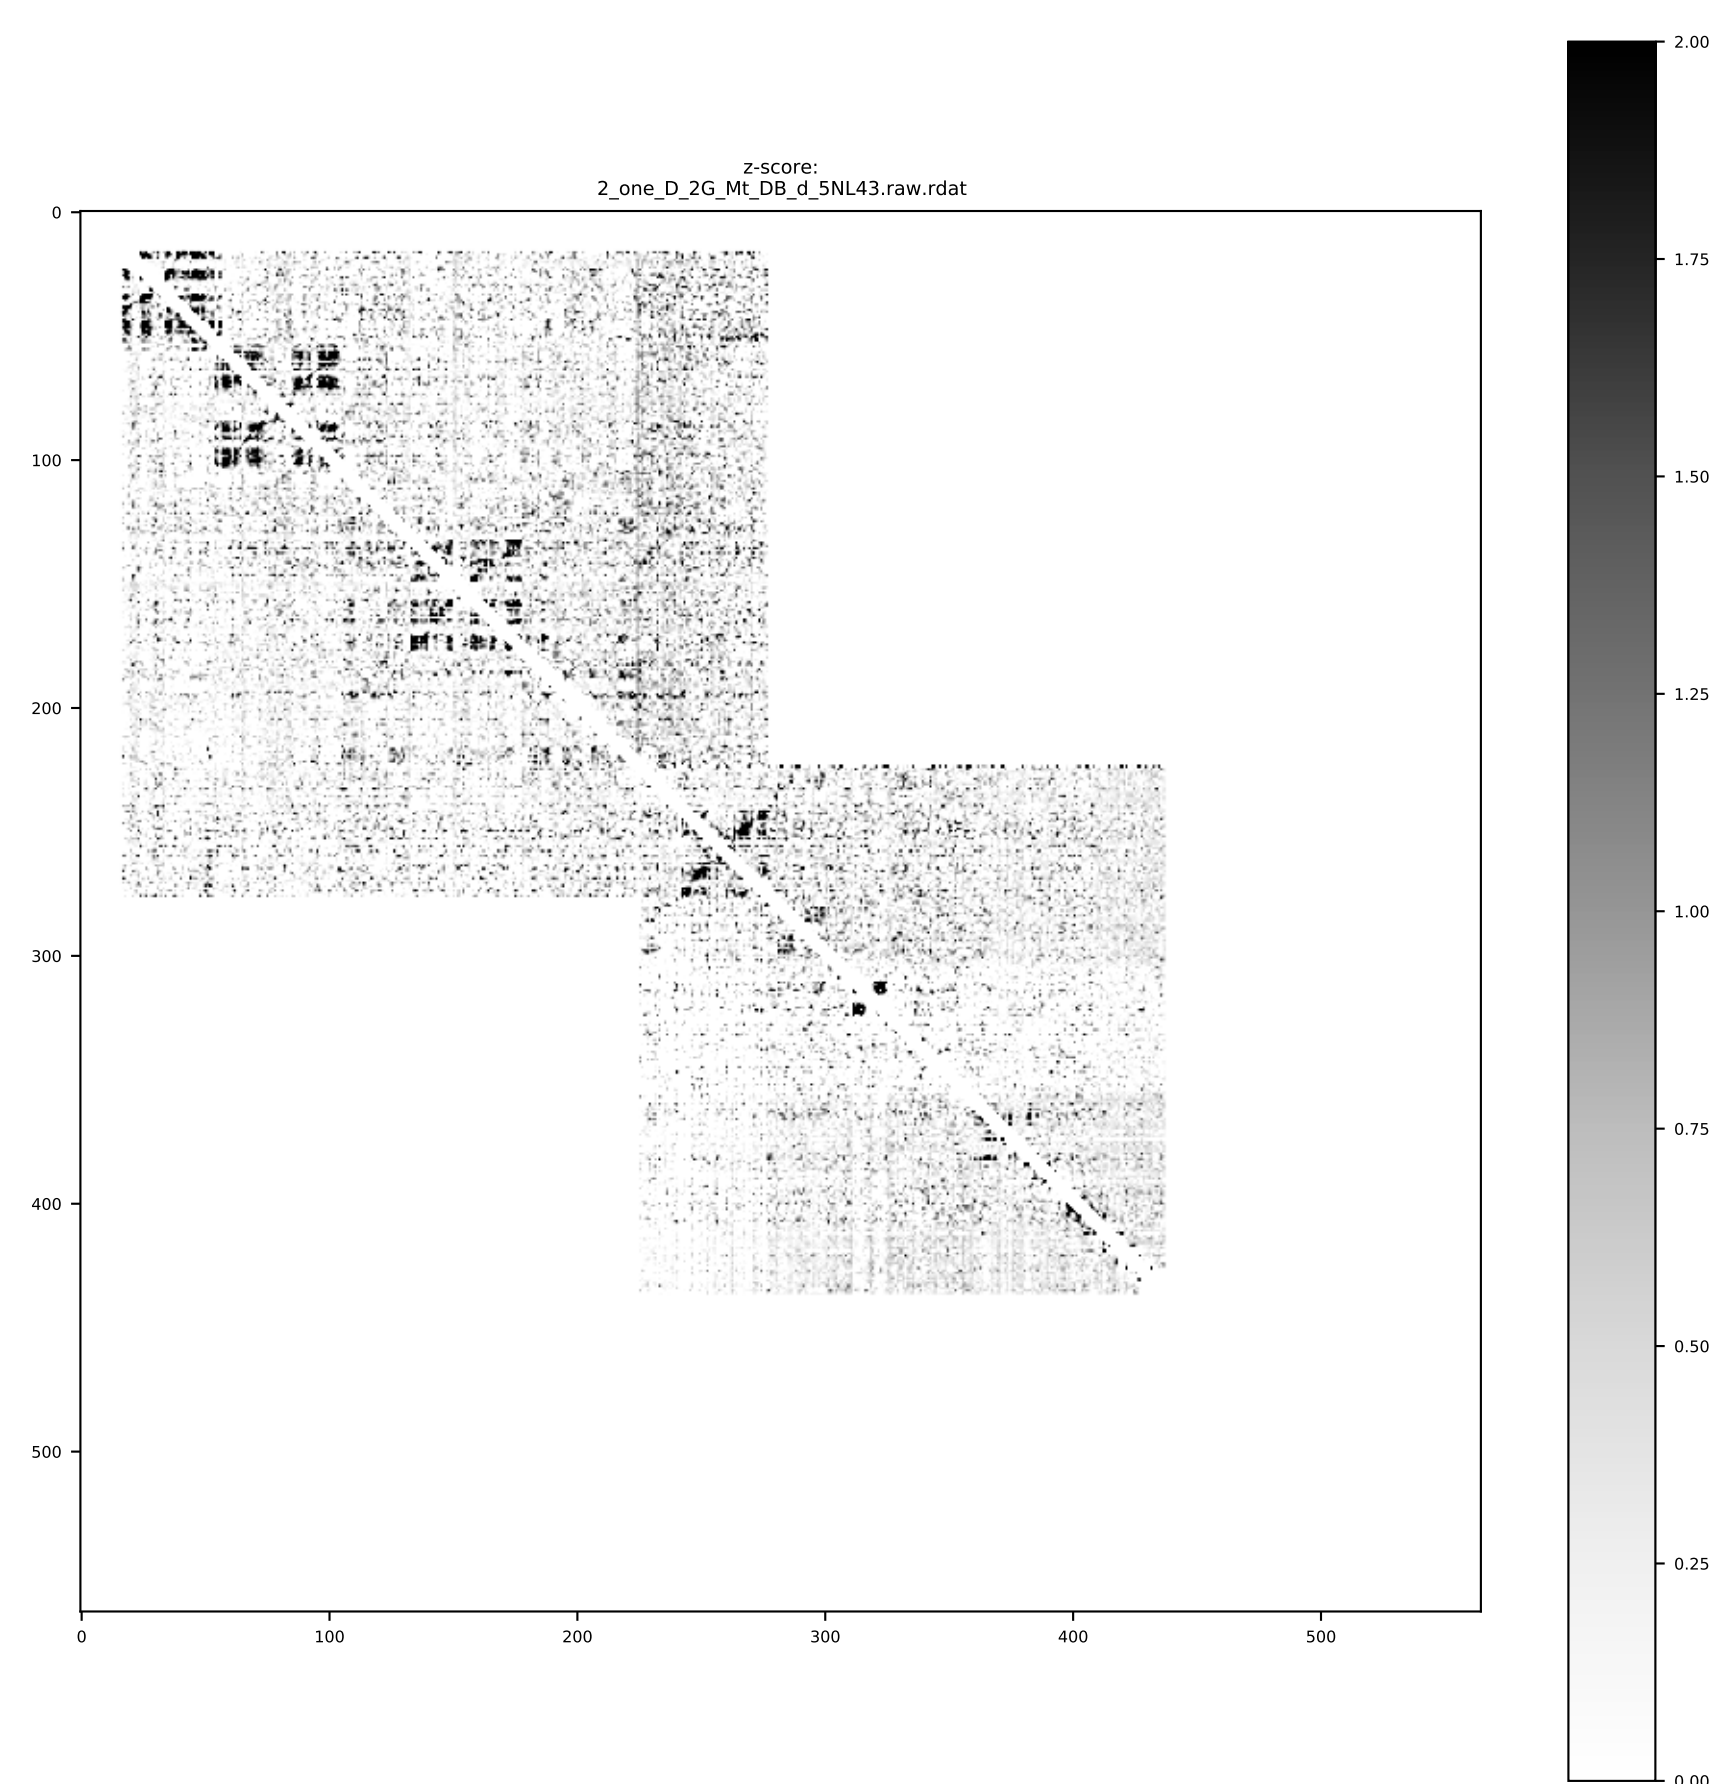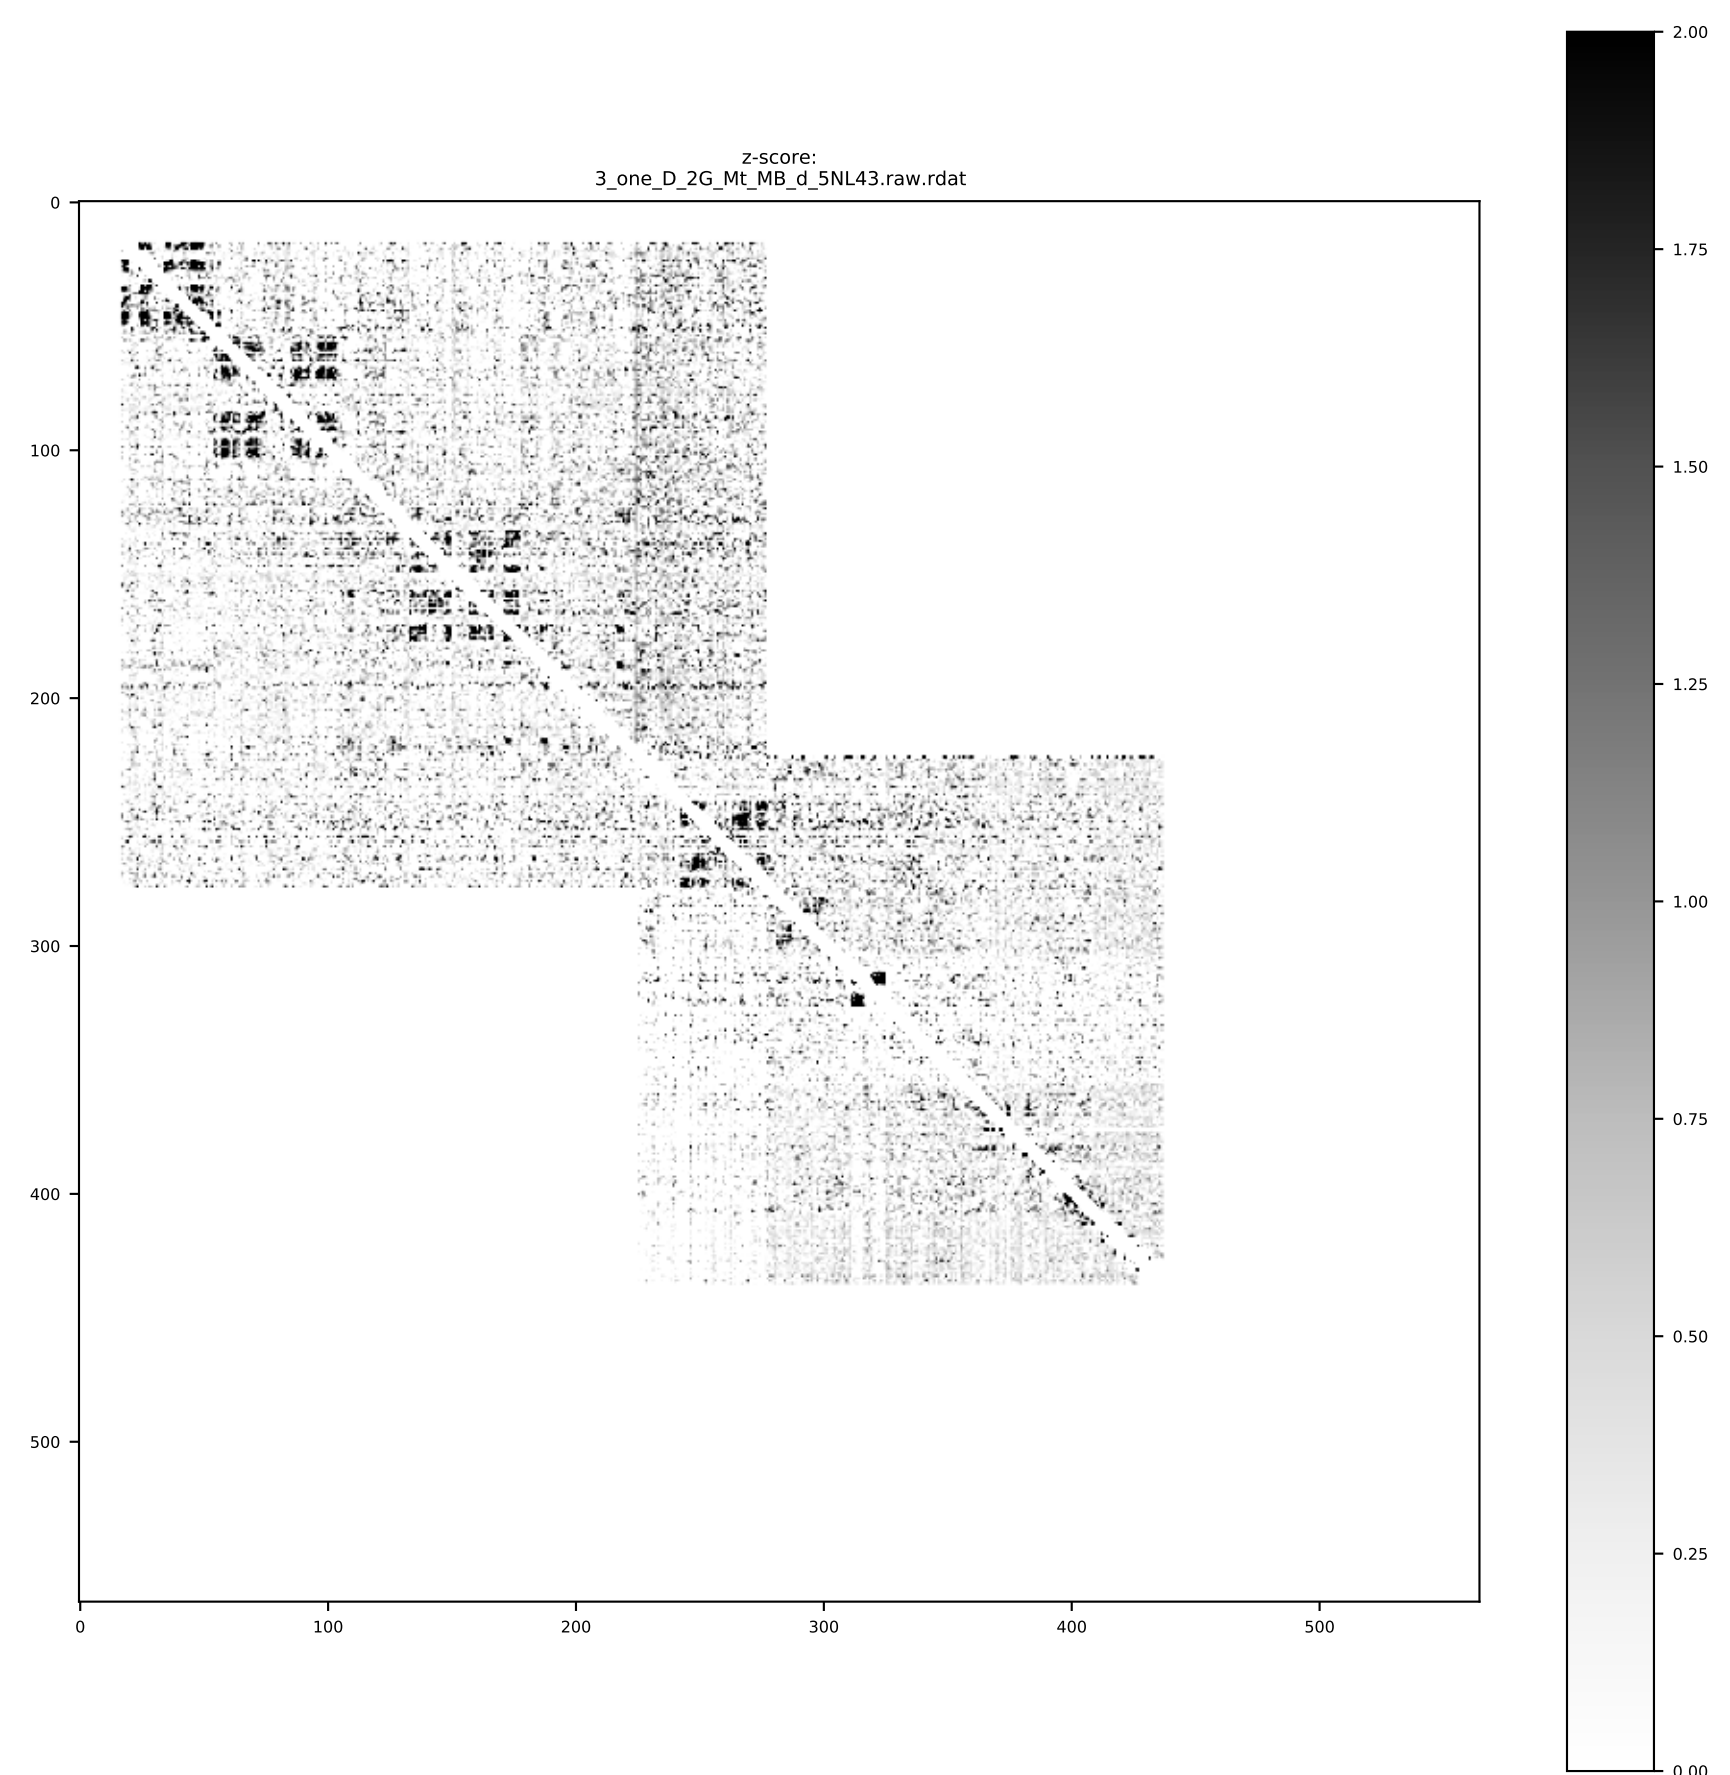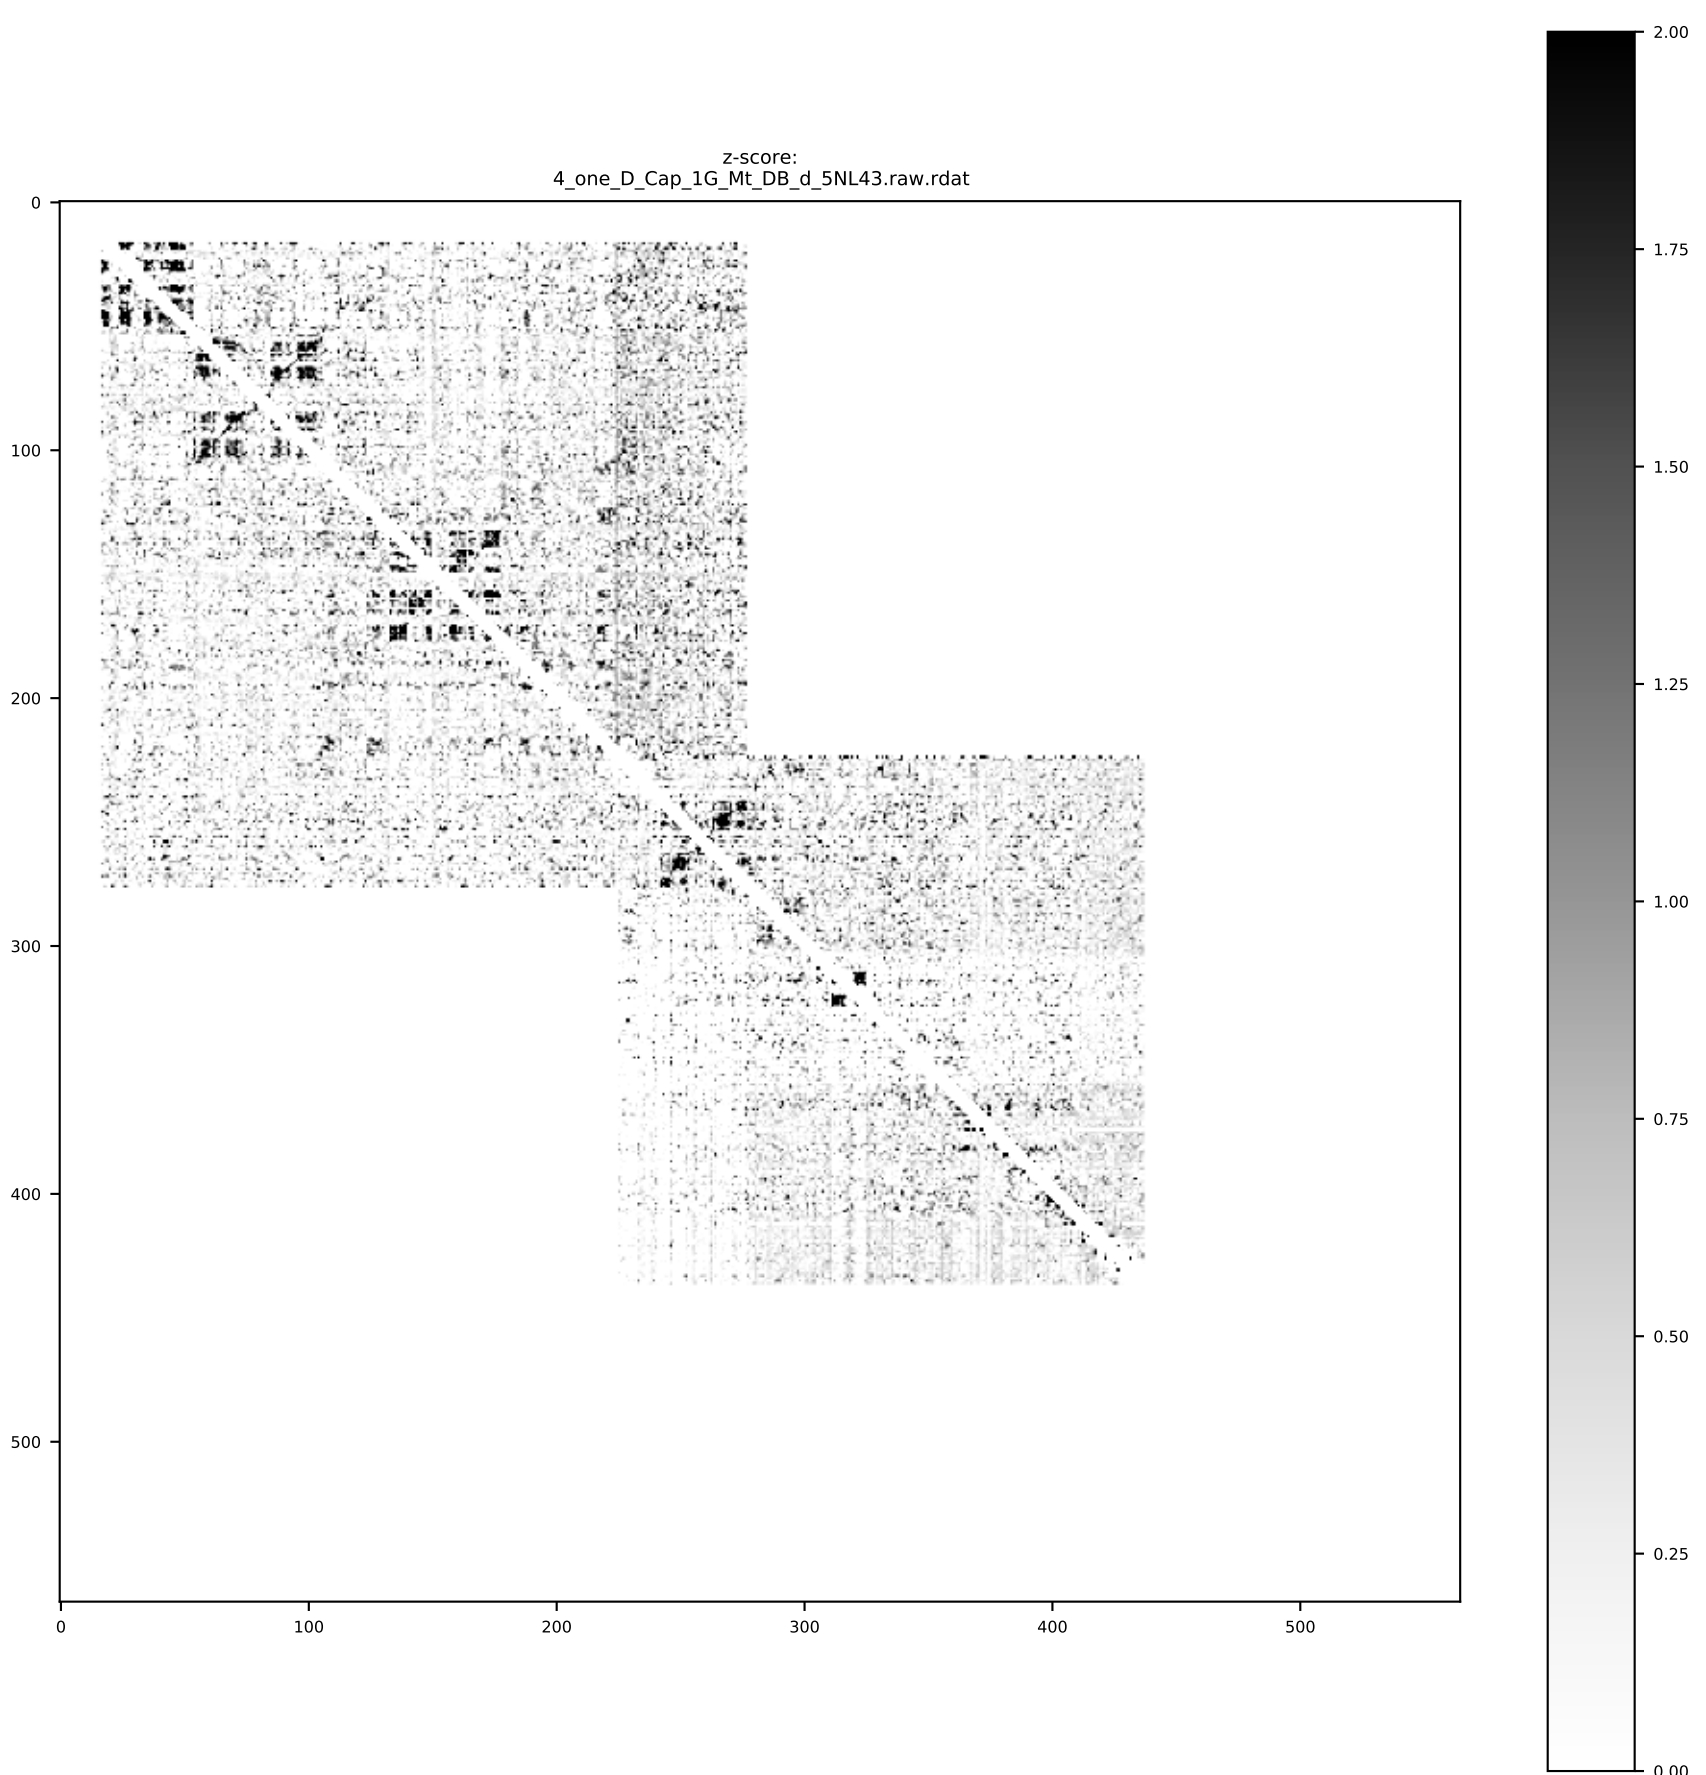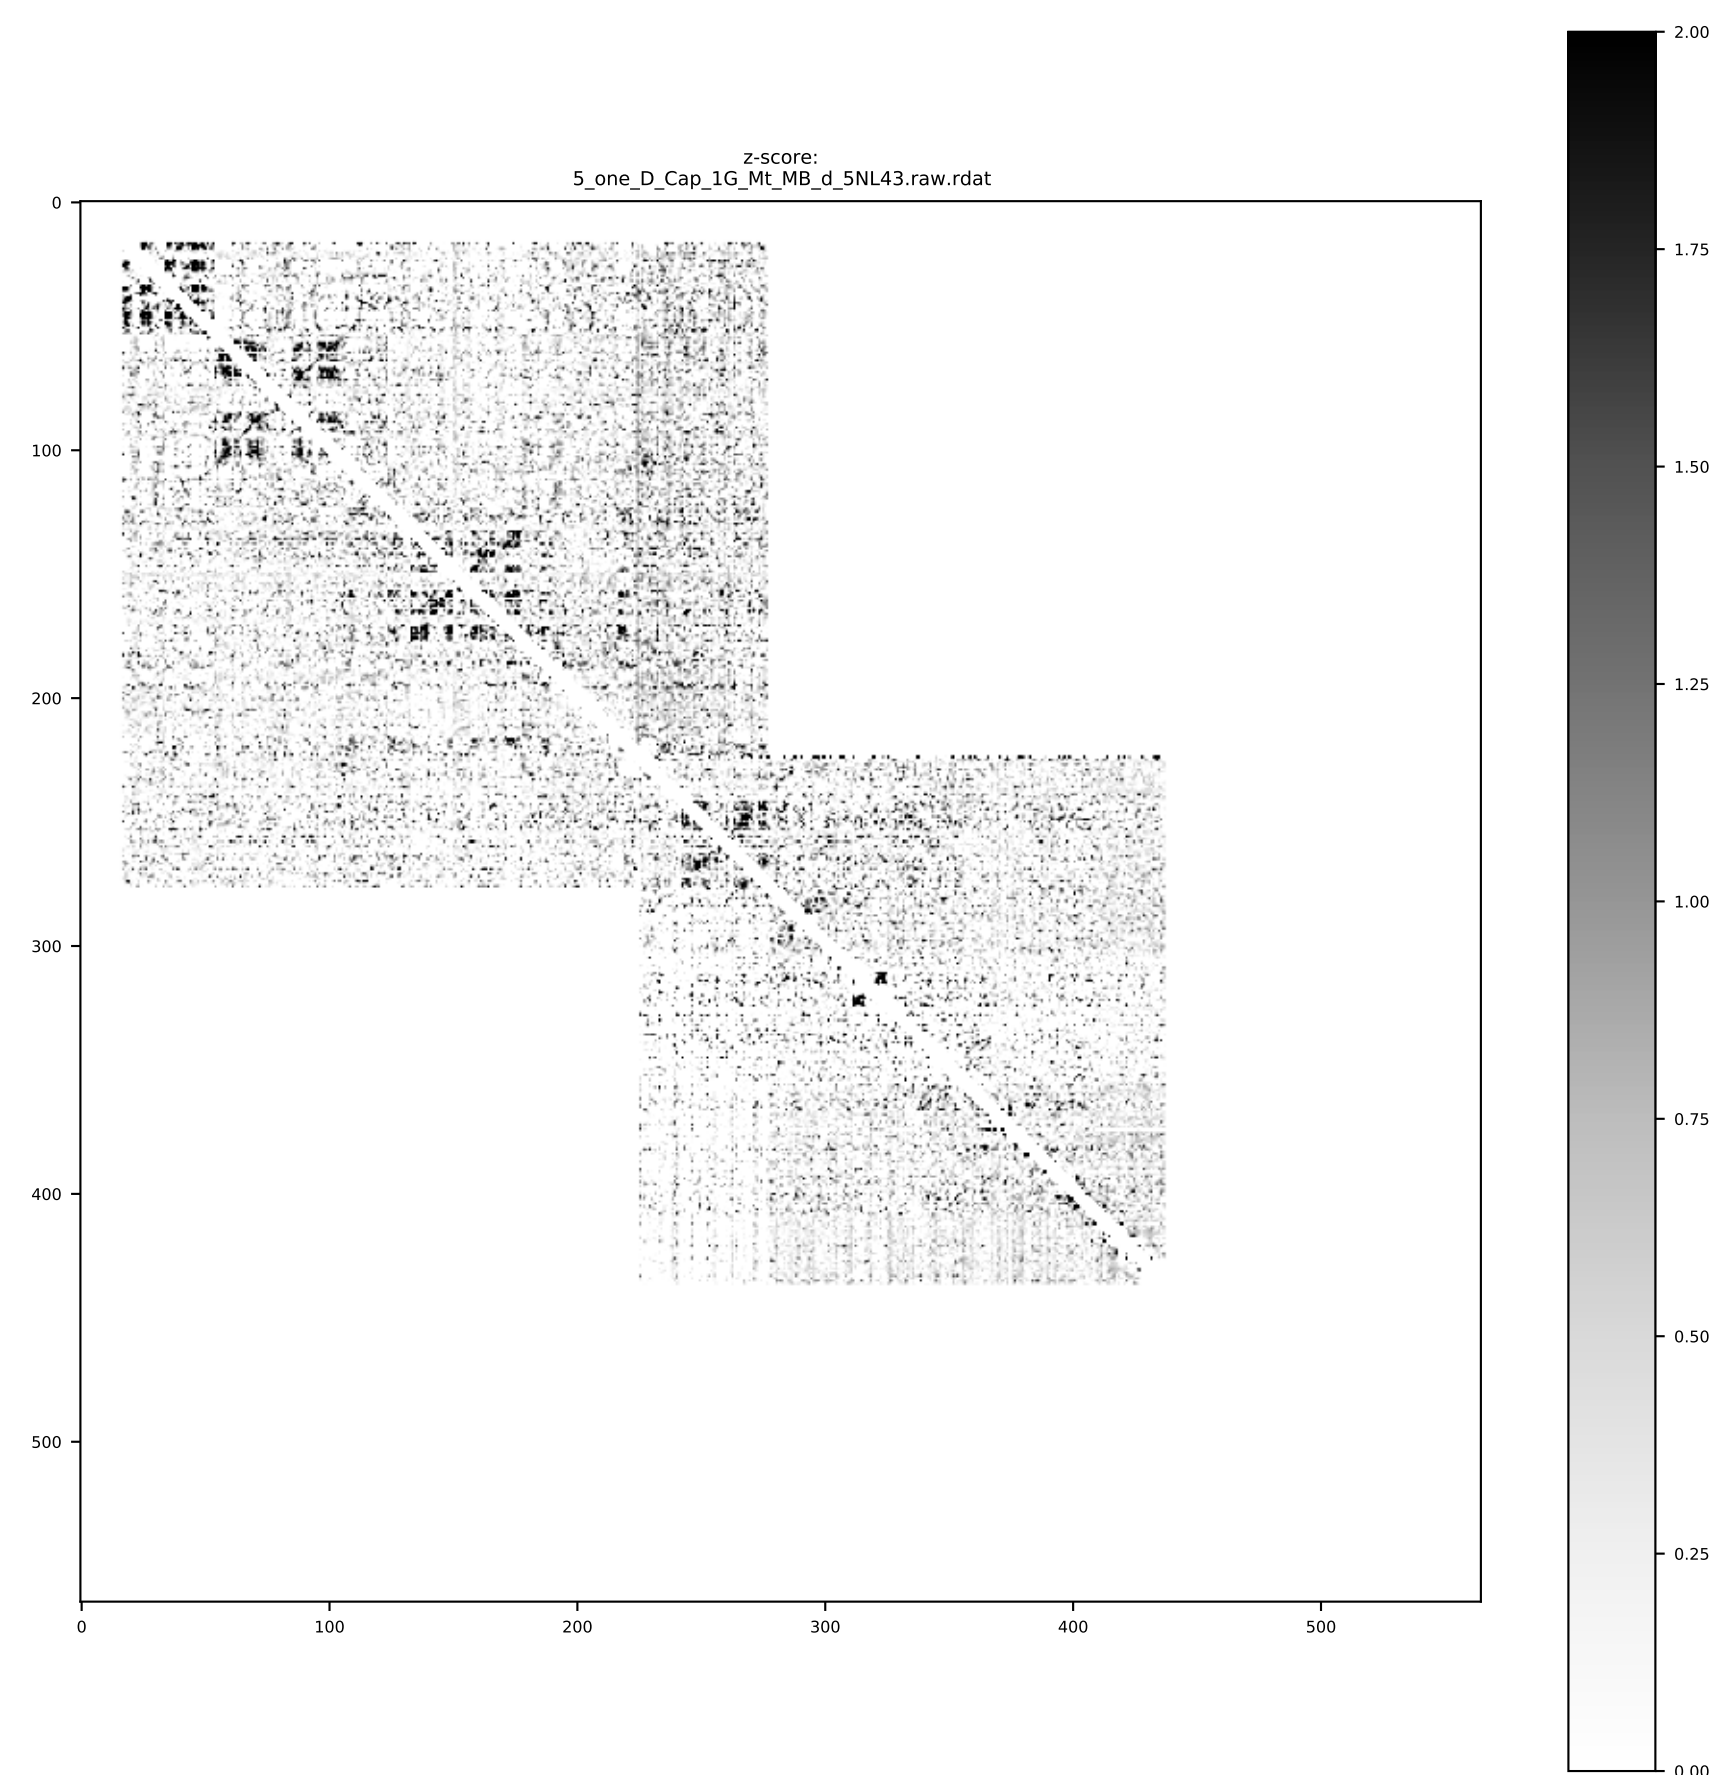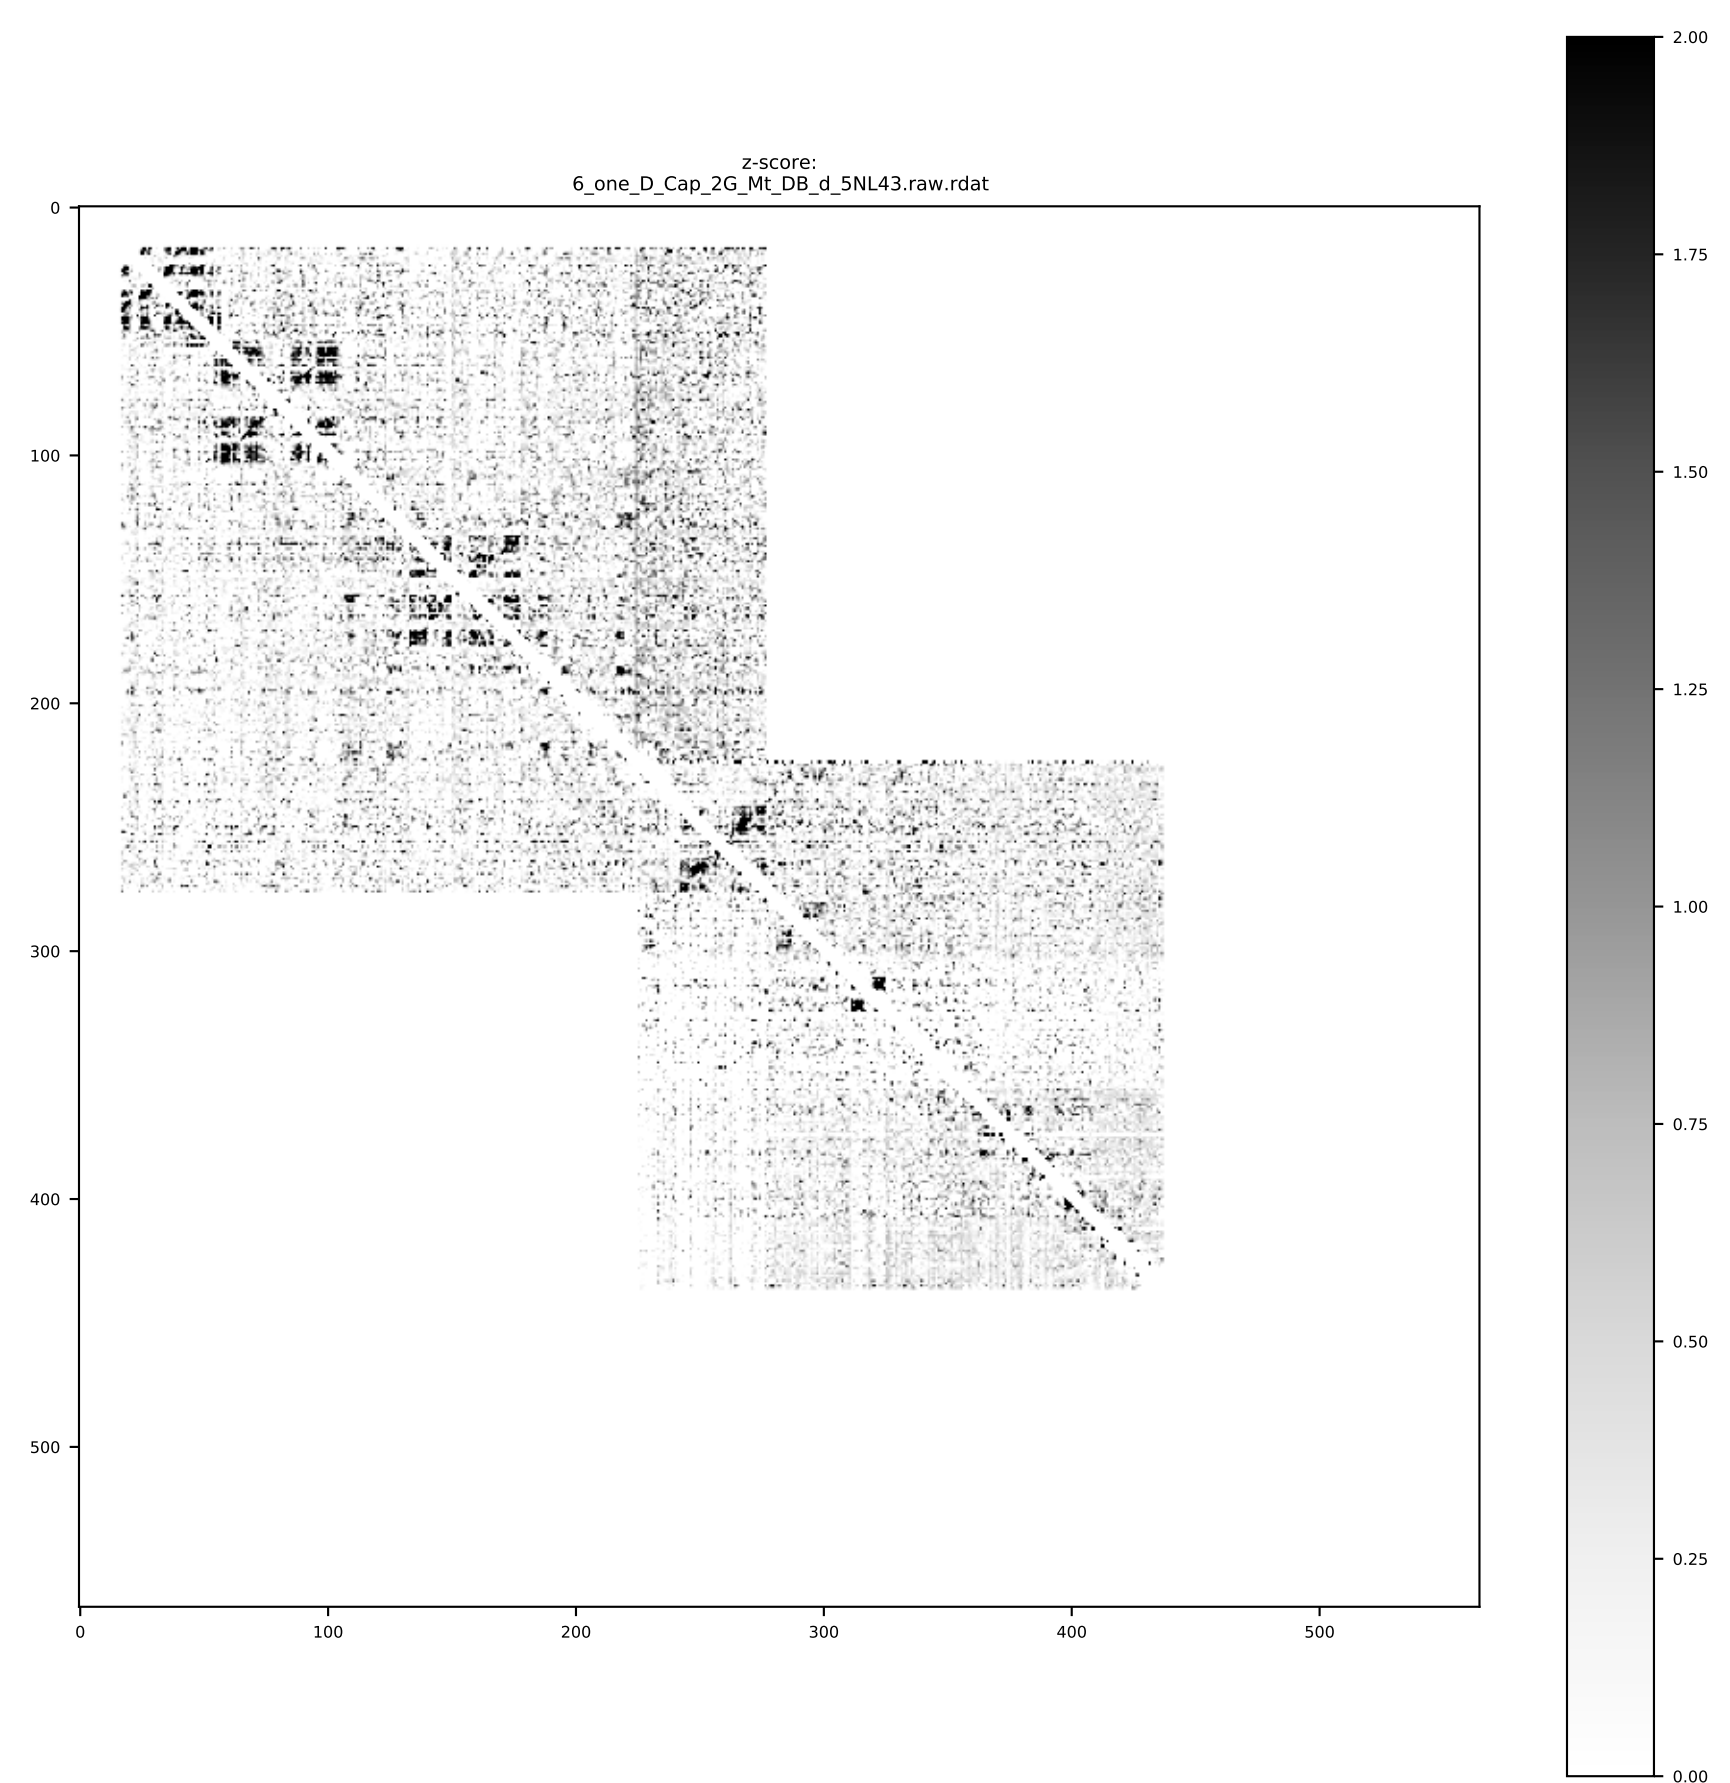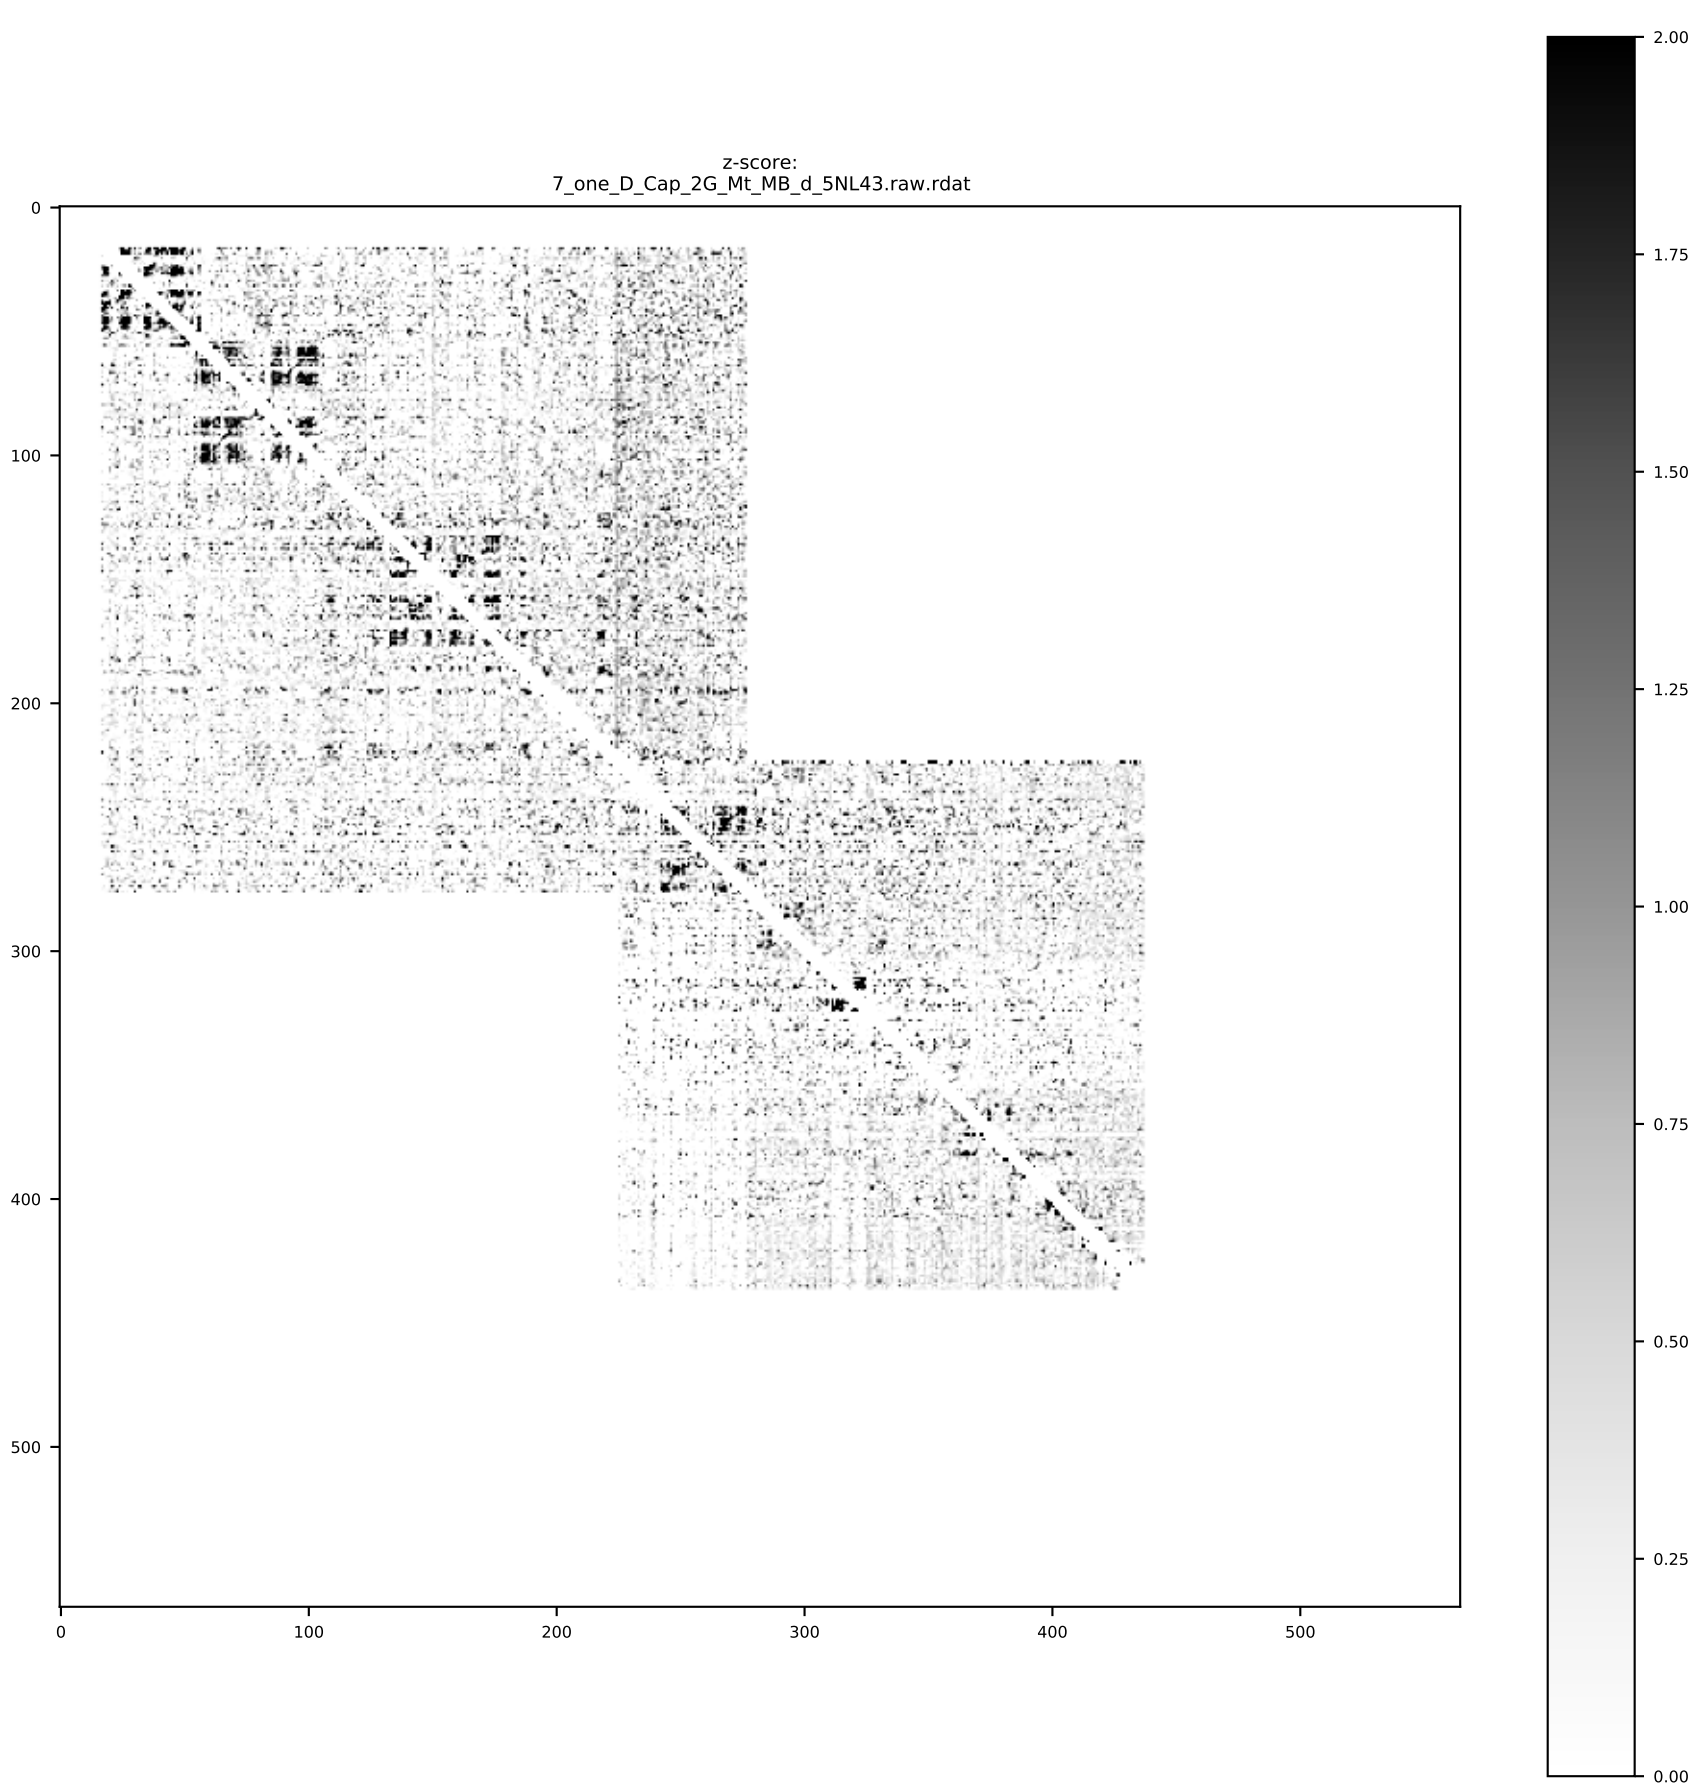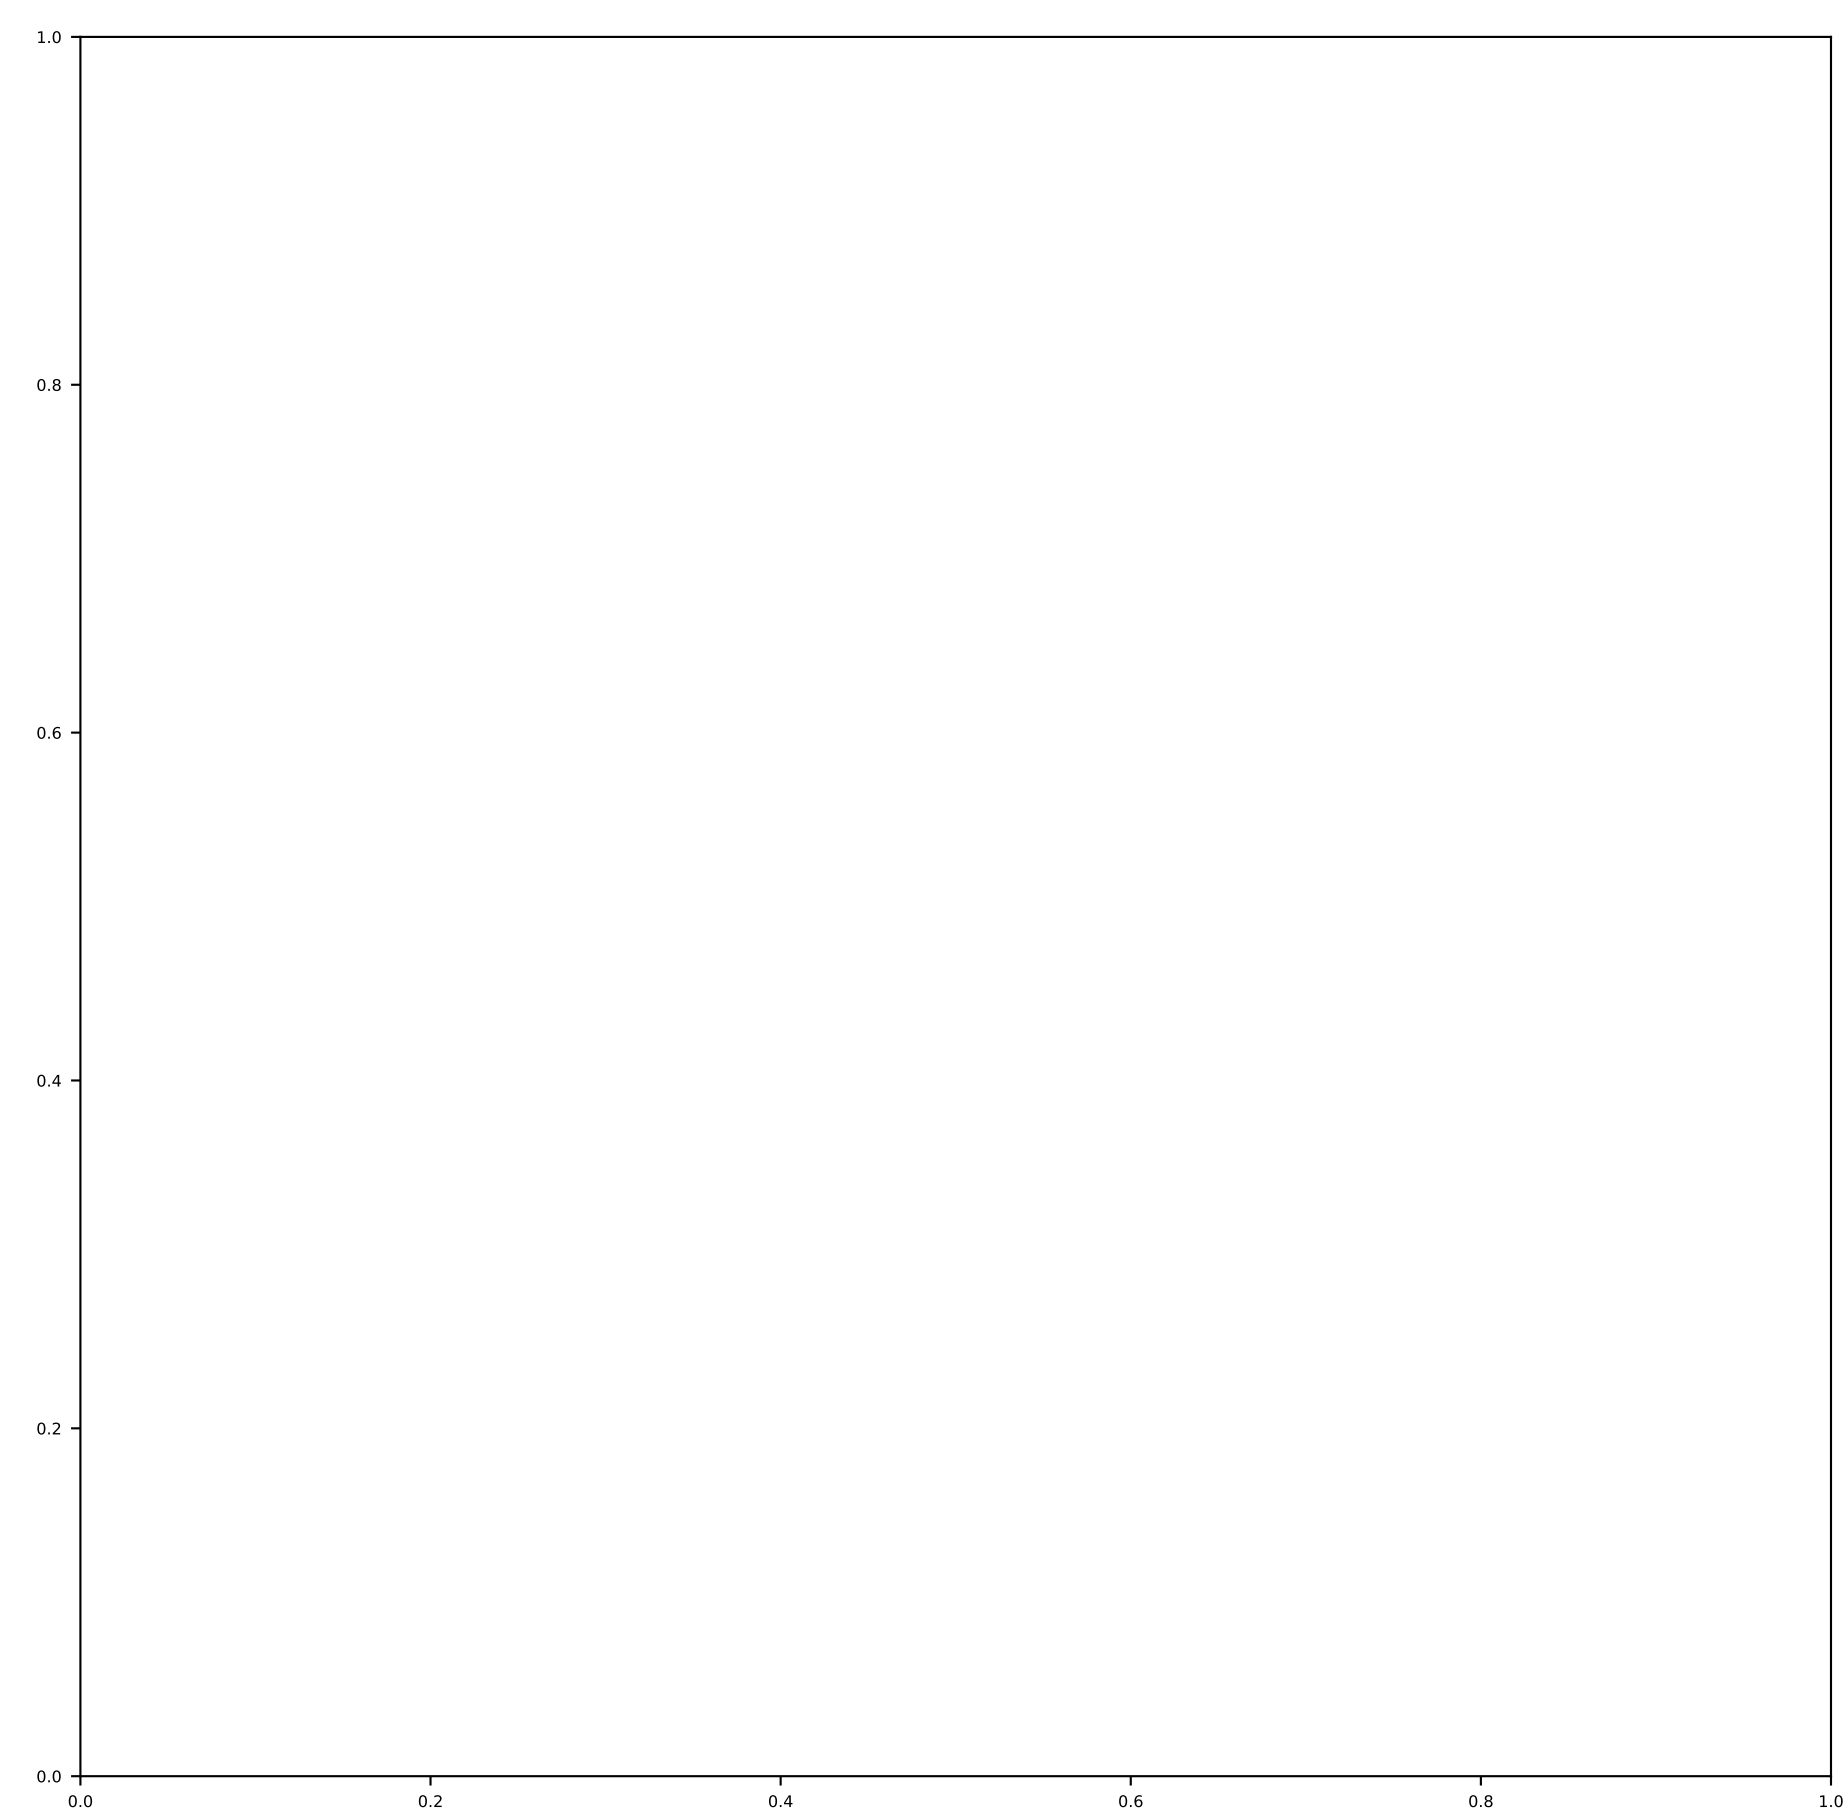

Supplement: Supplementary file 27 [file one_two_G_dimer_z_score.pdf › 2d-structure-inference/z_score/one_two_G_dimer_z_score.pdf]

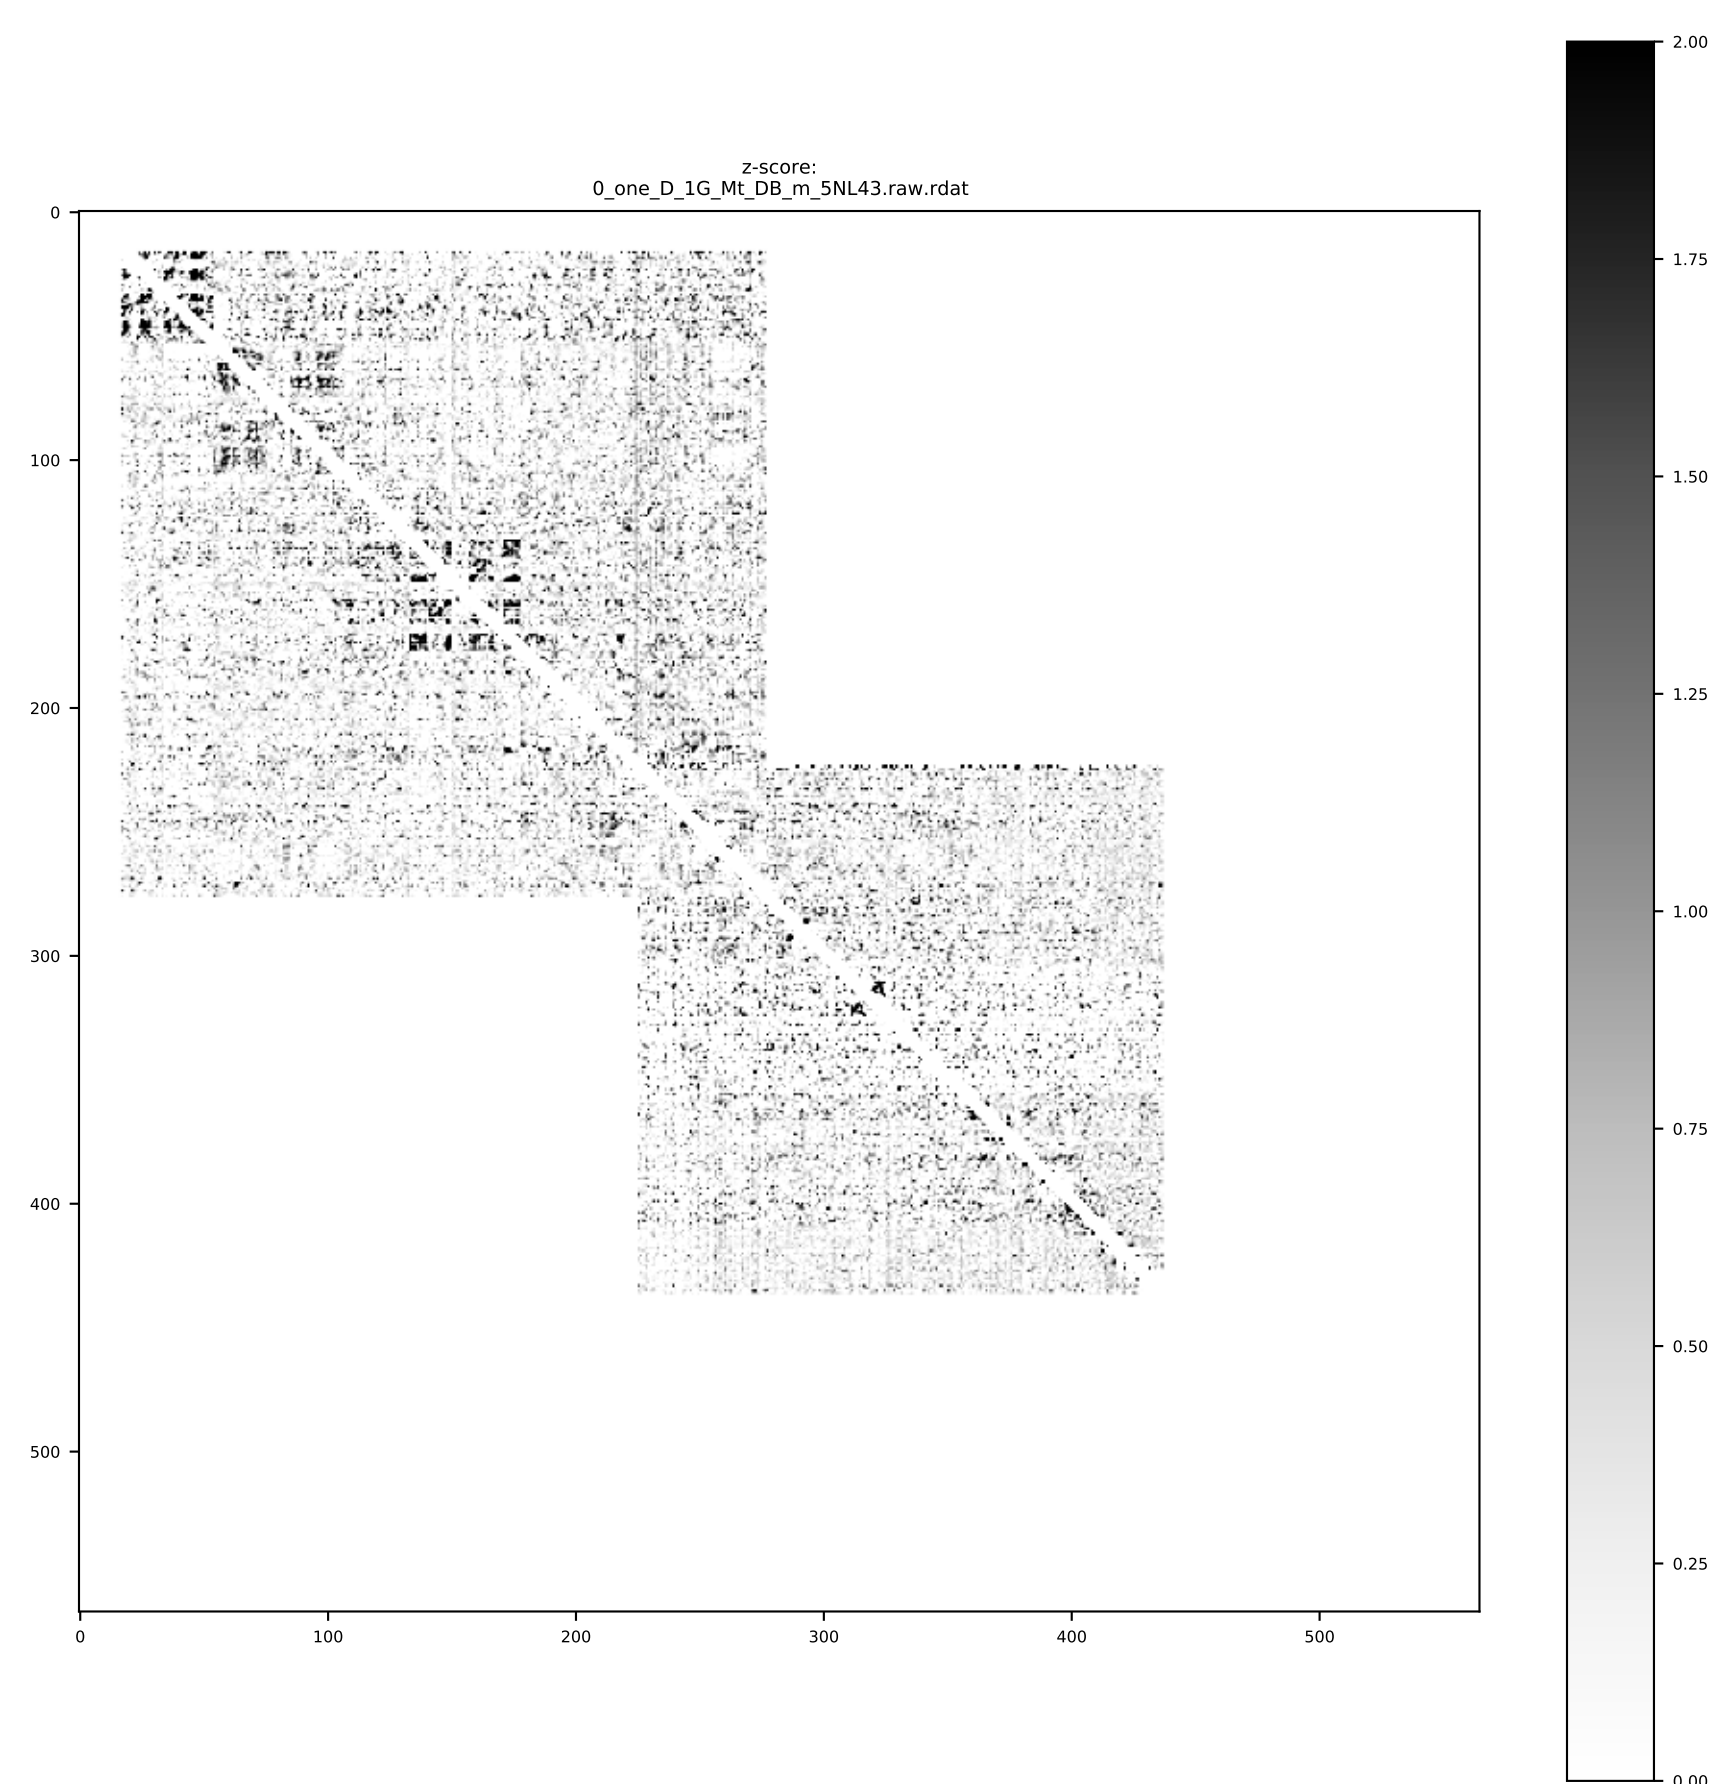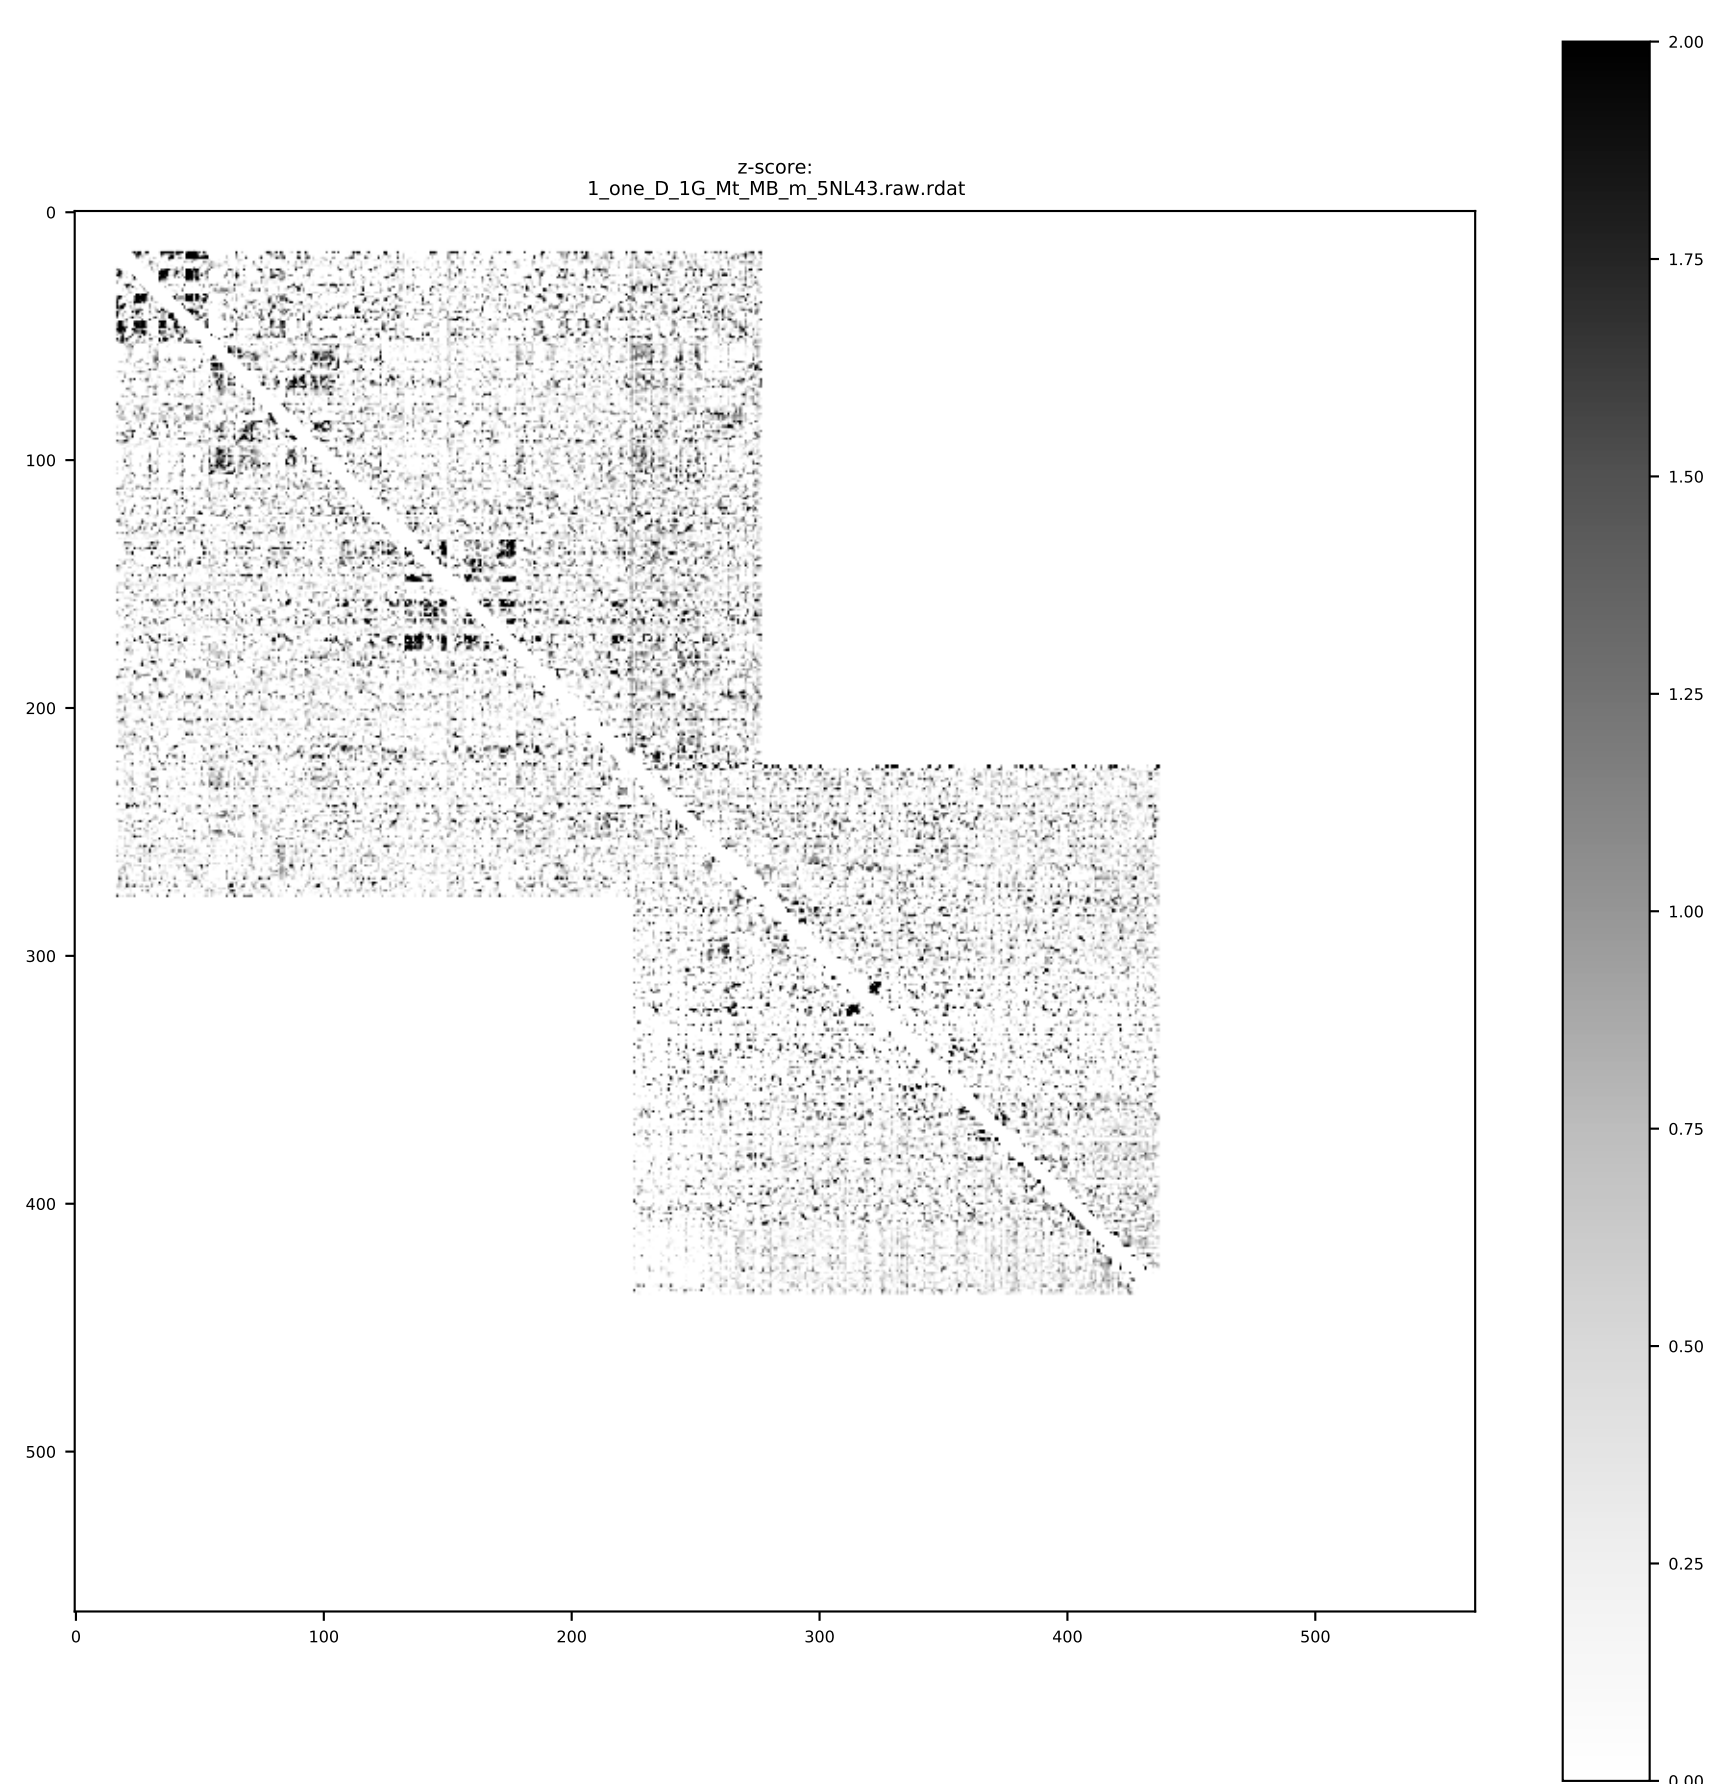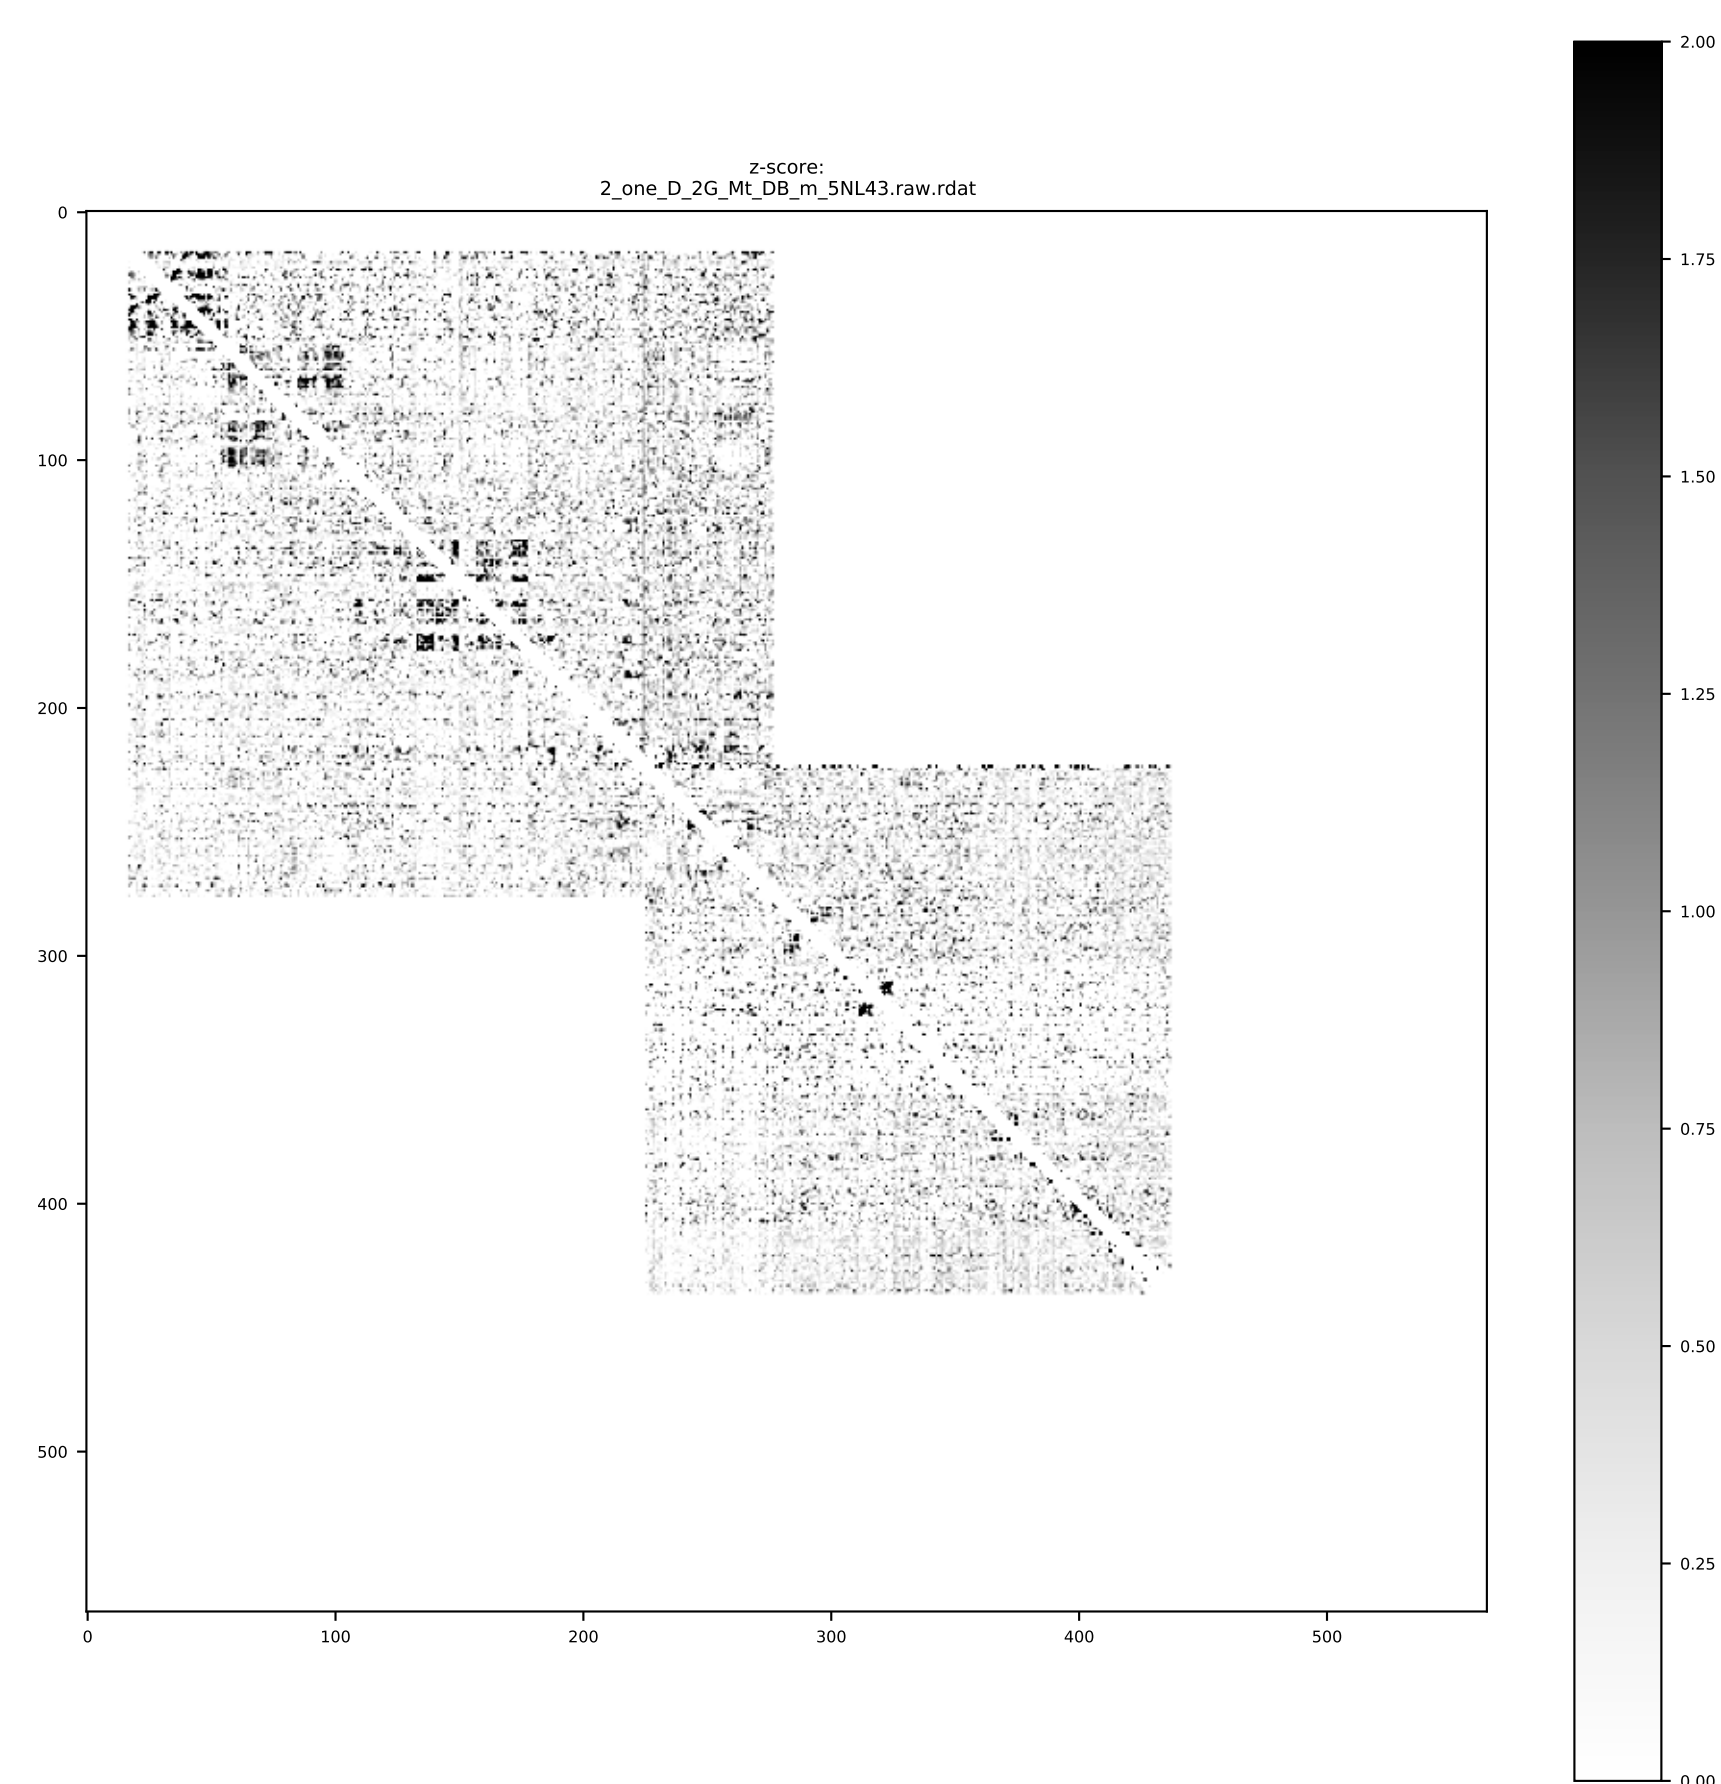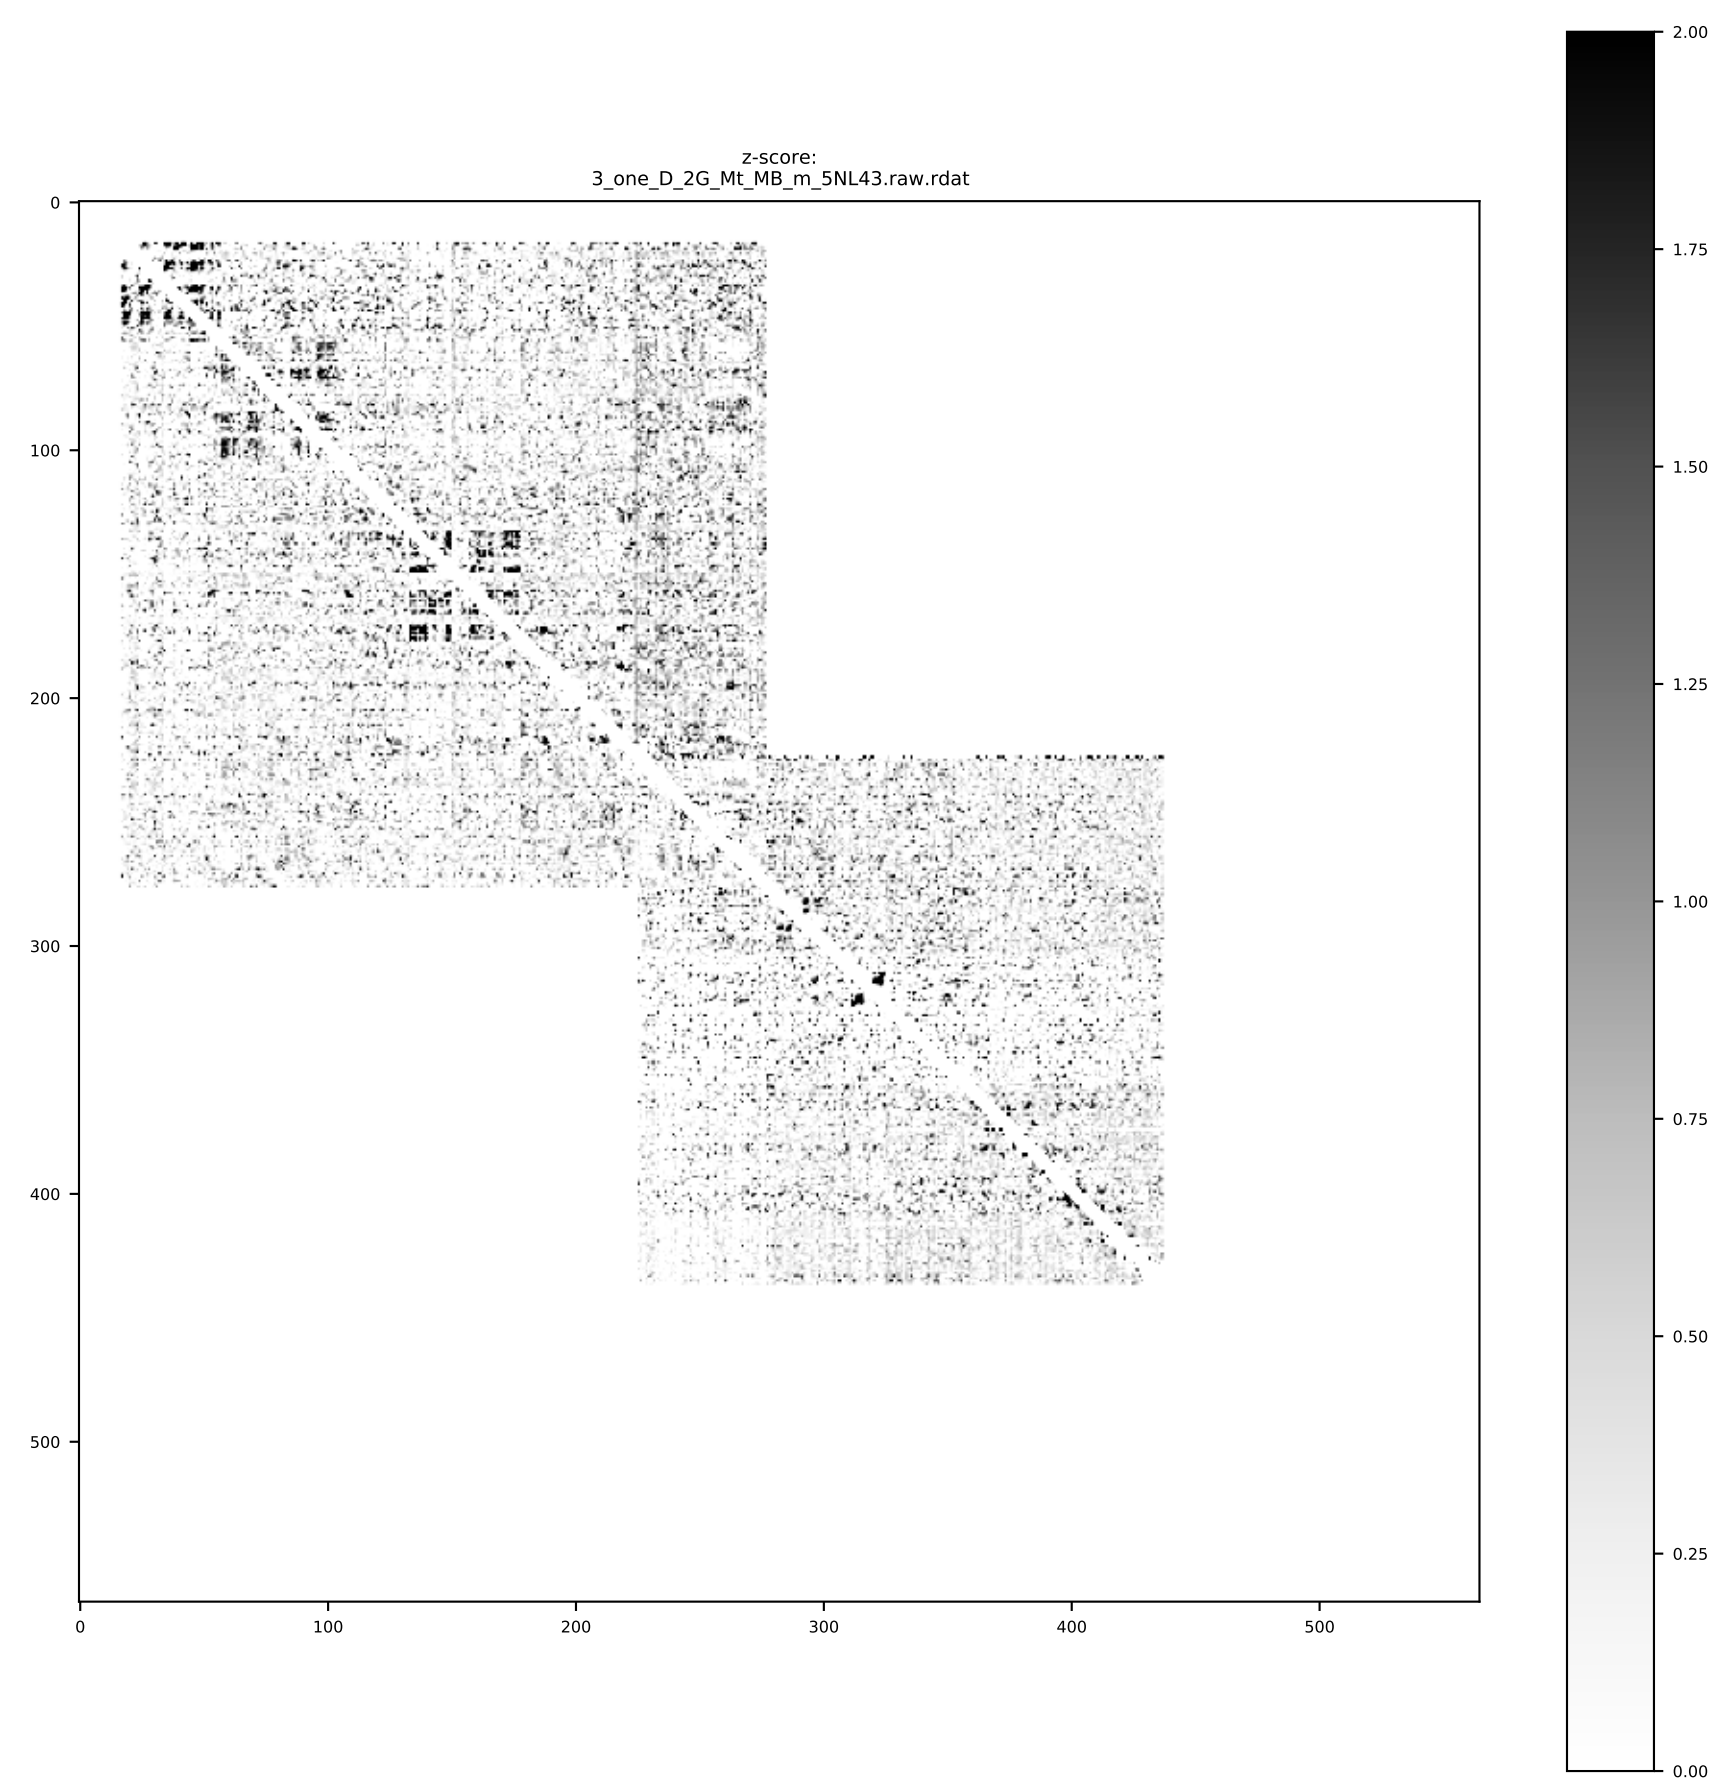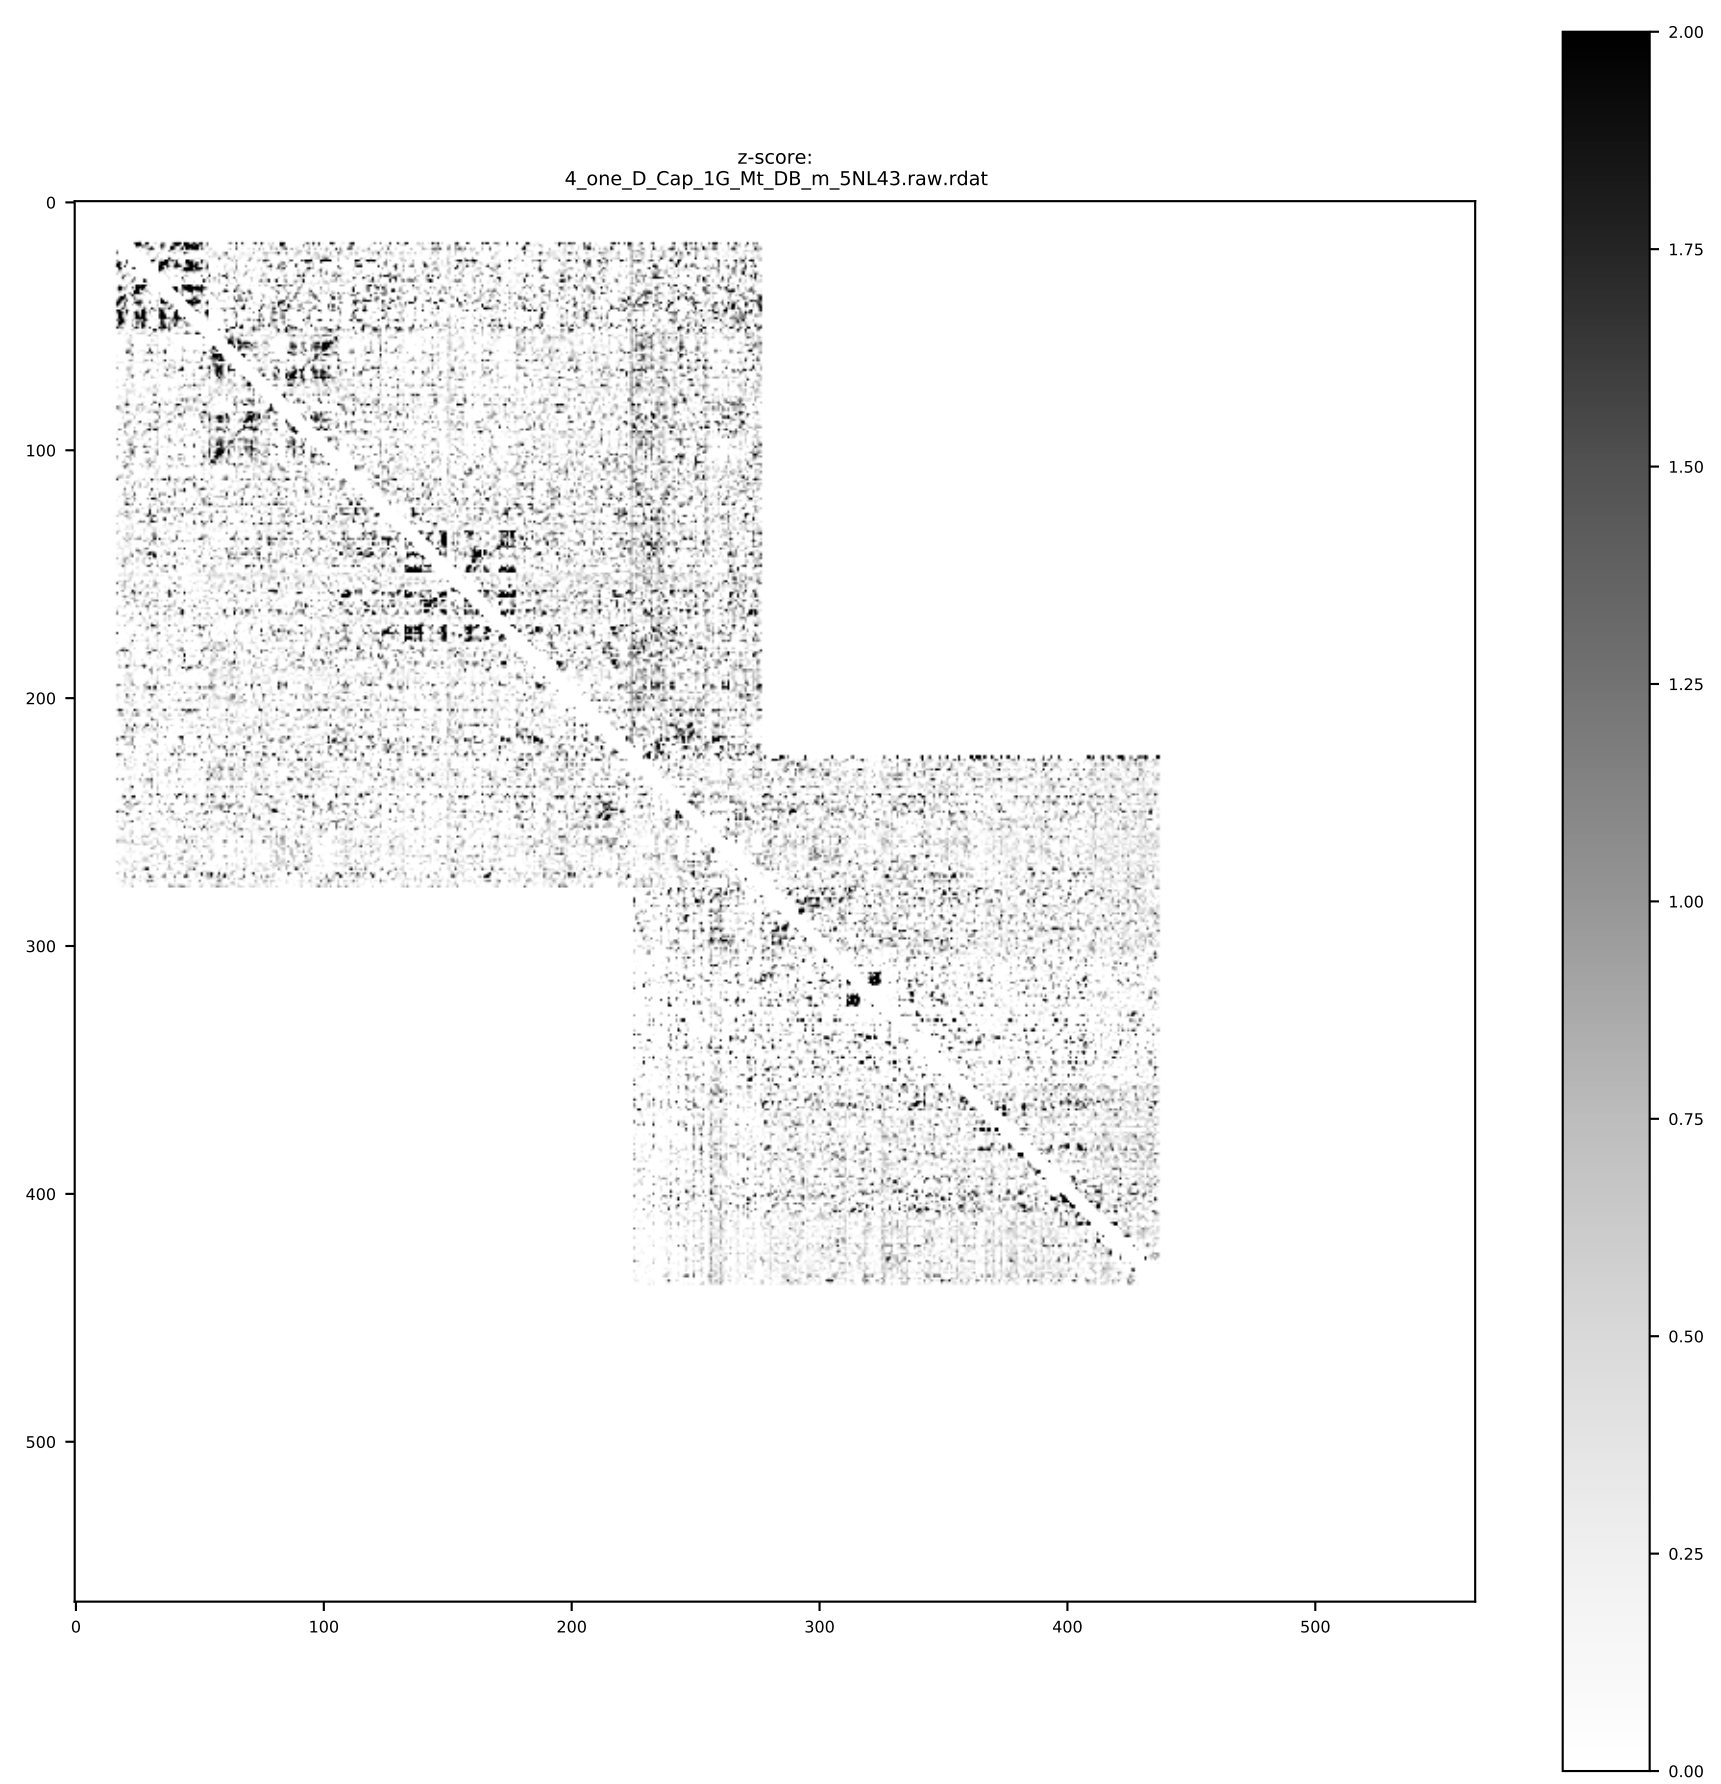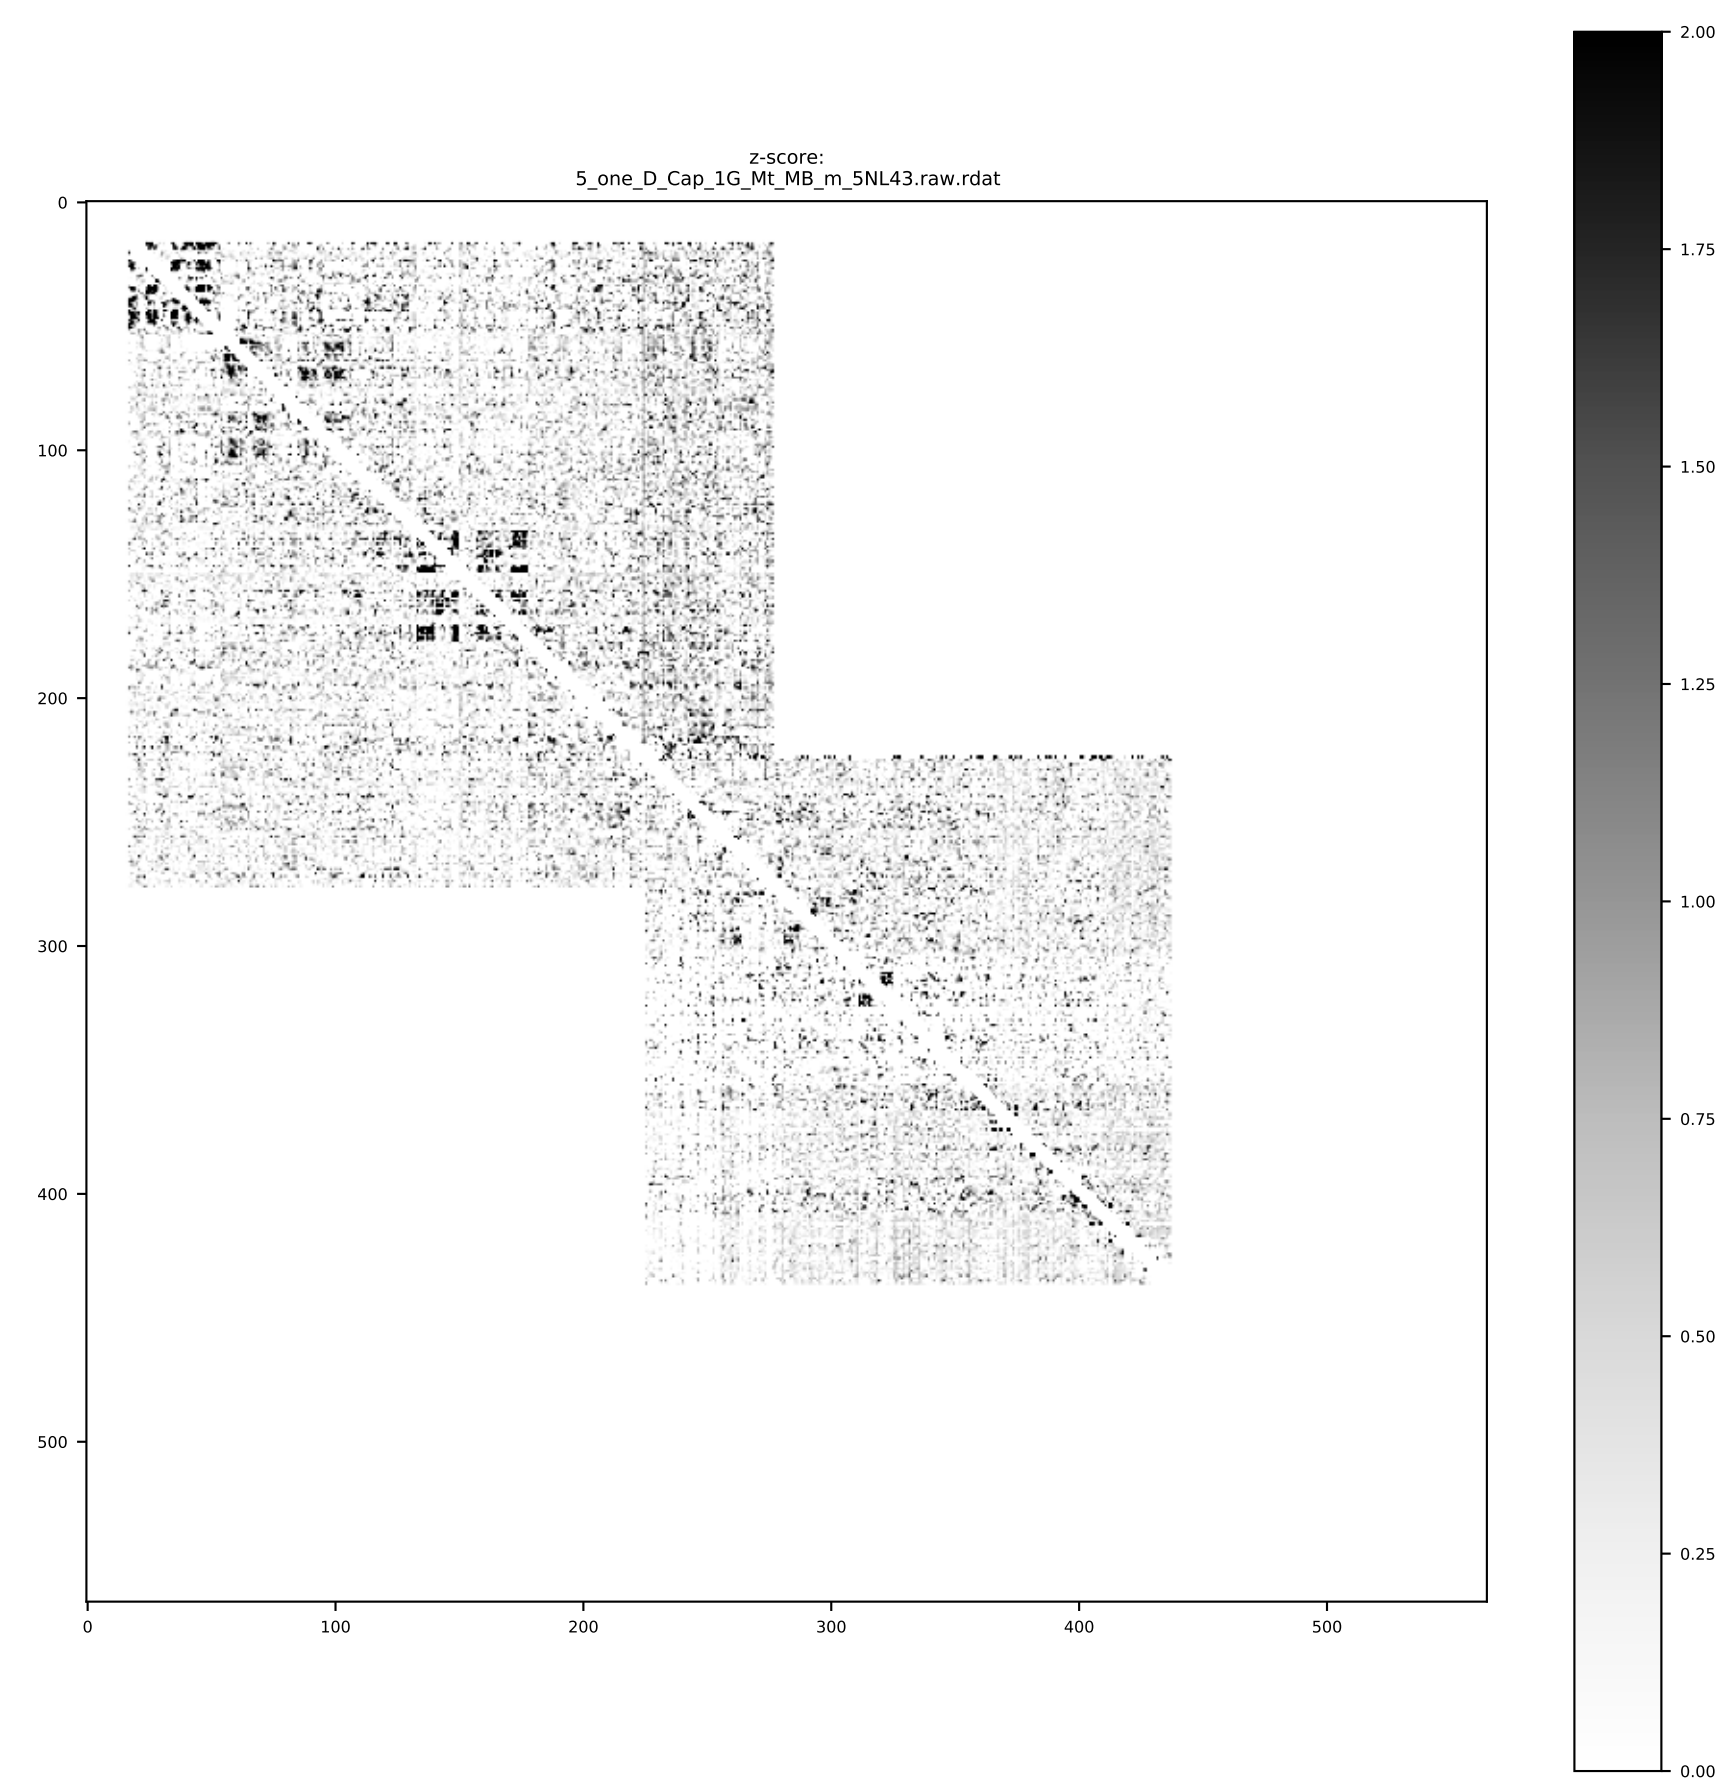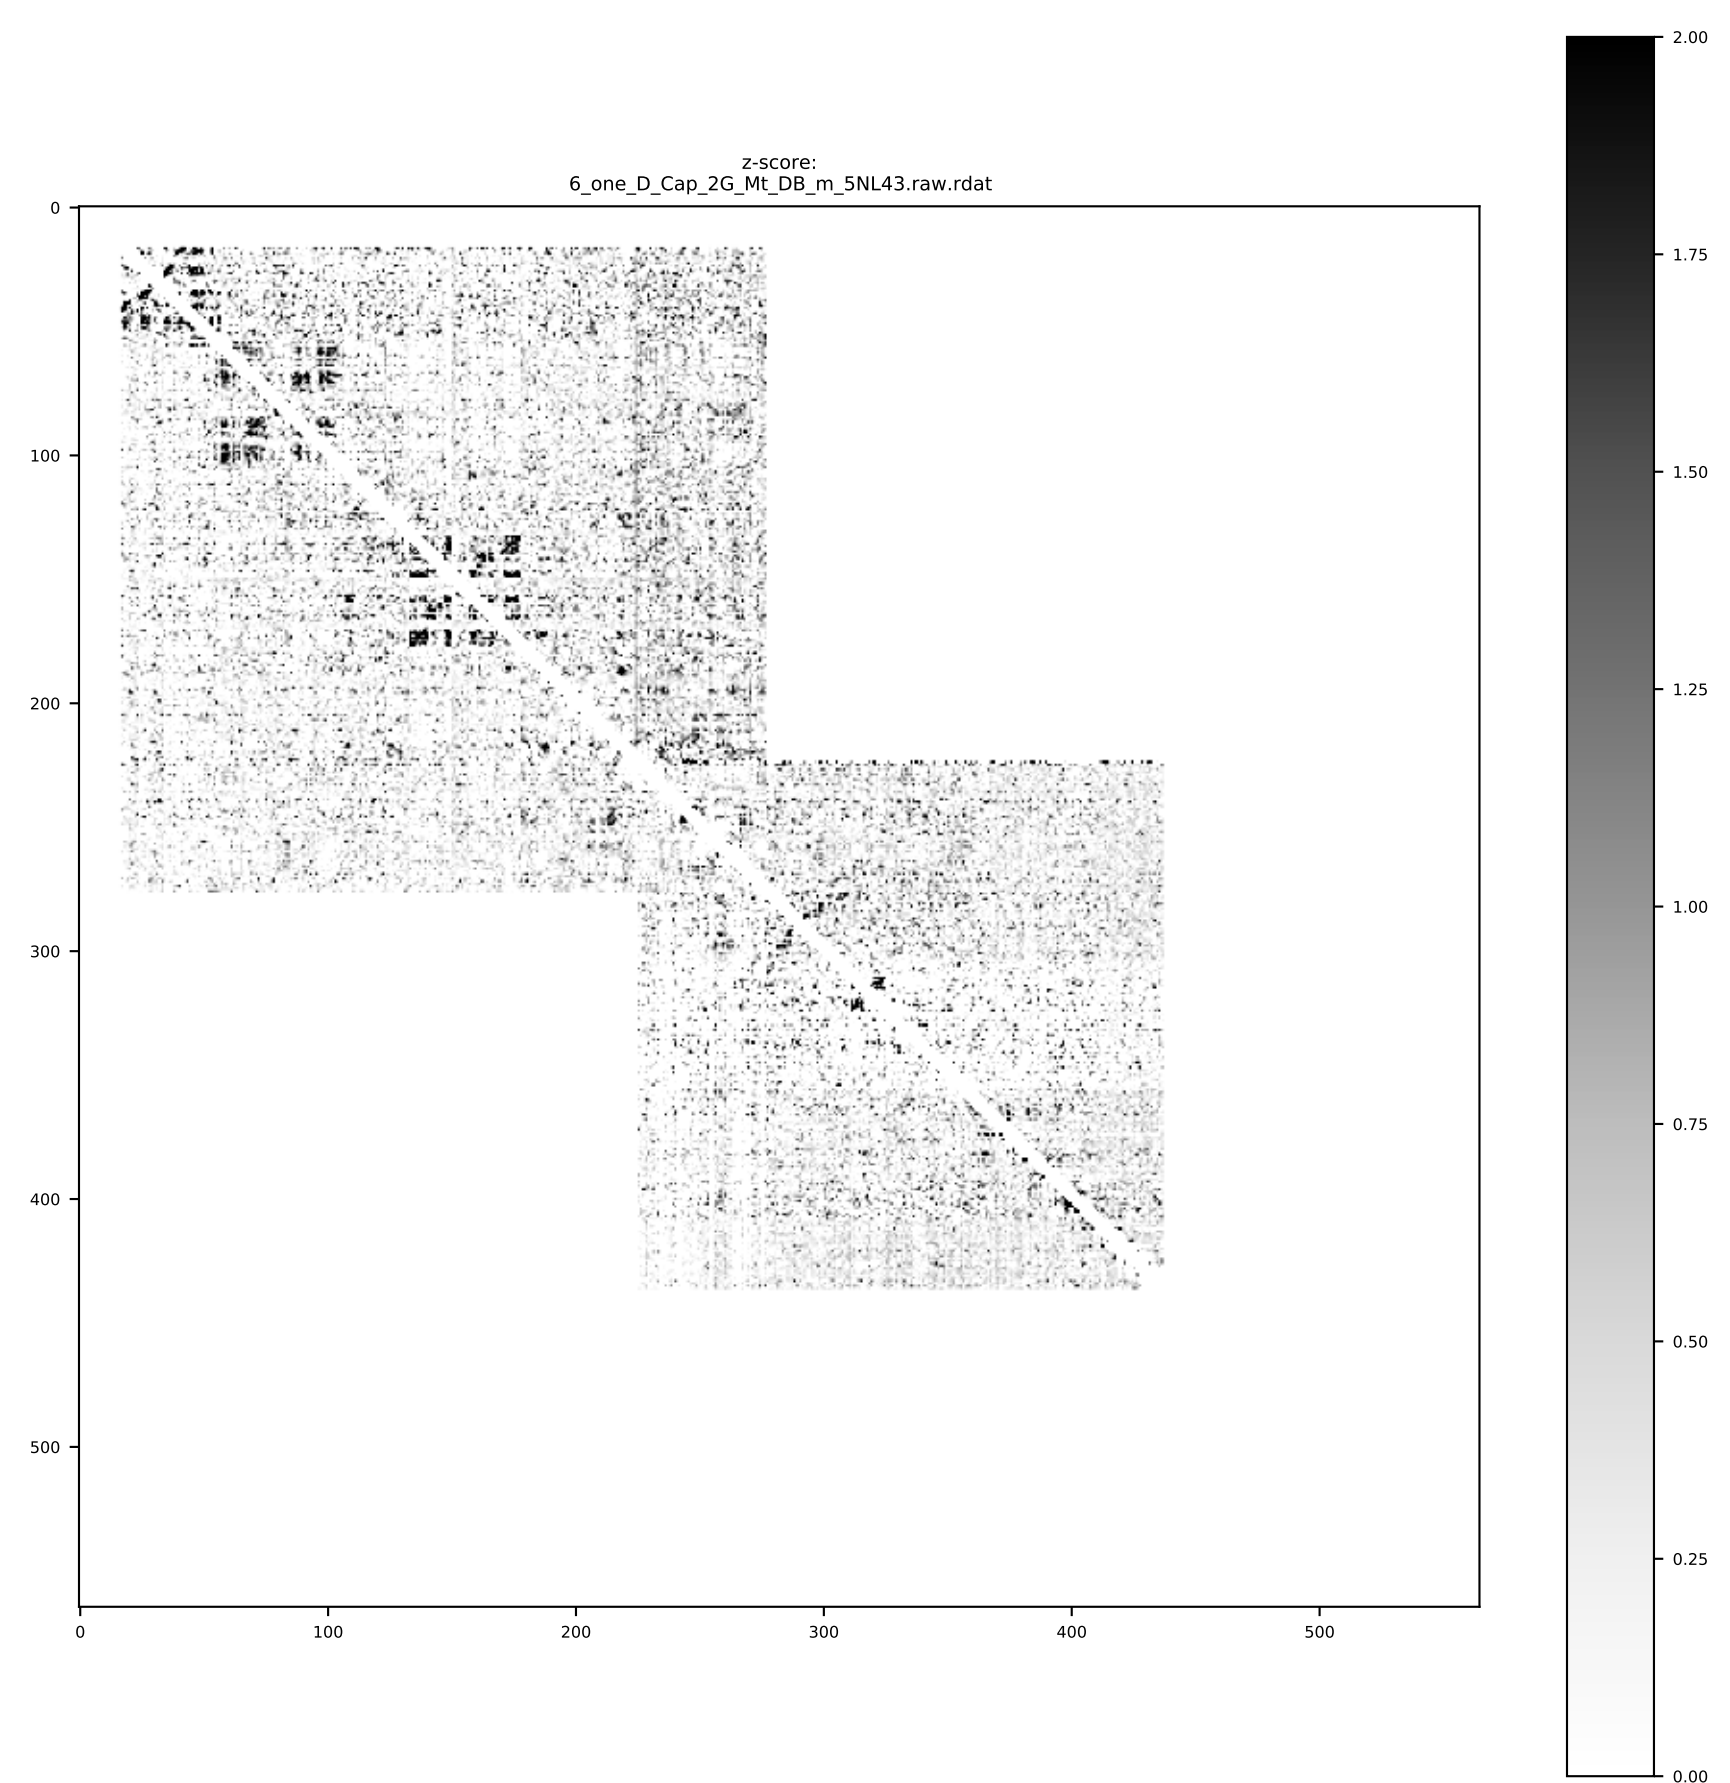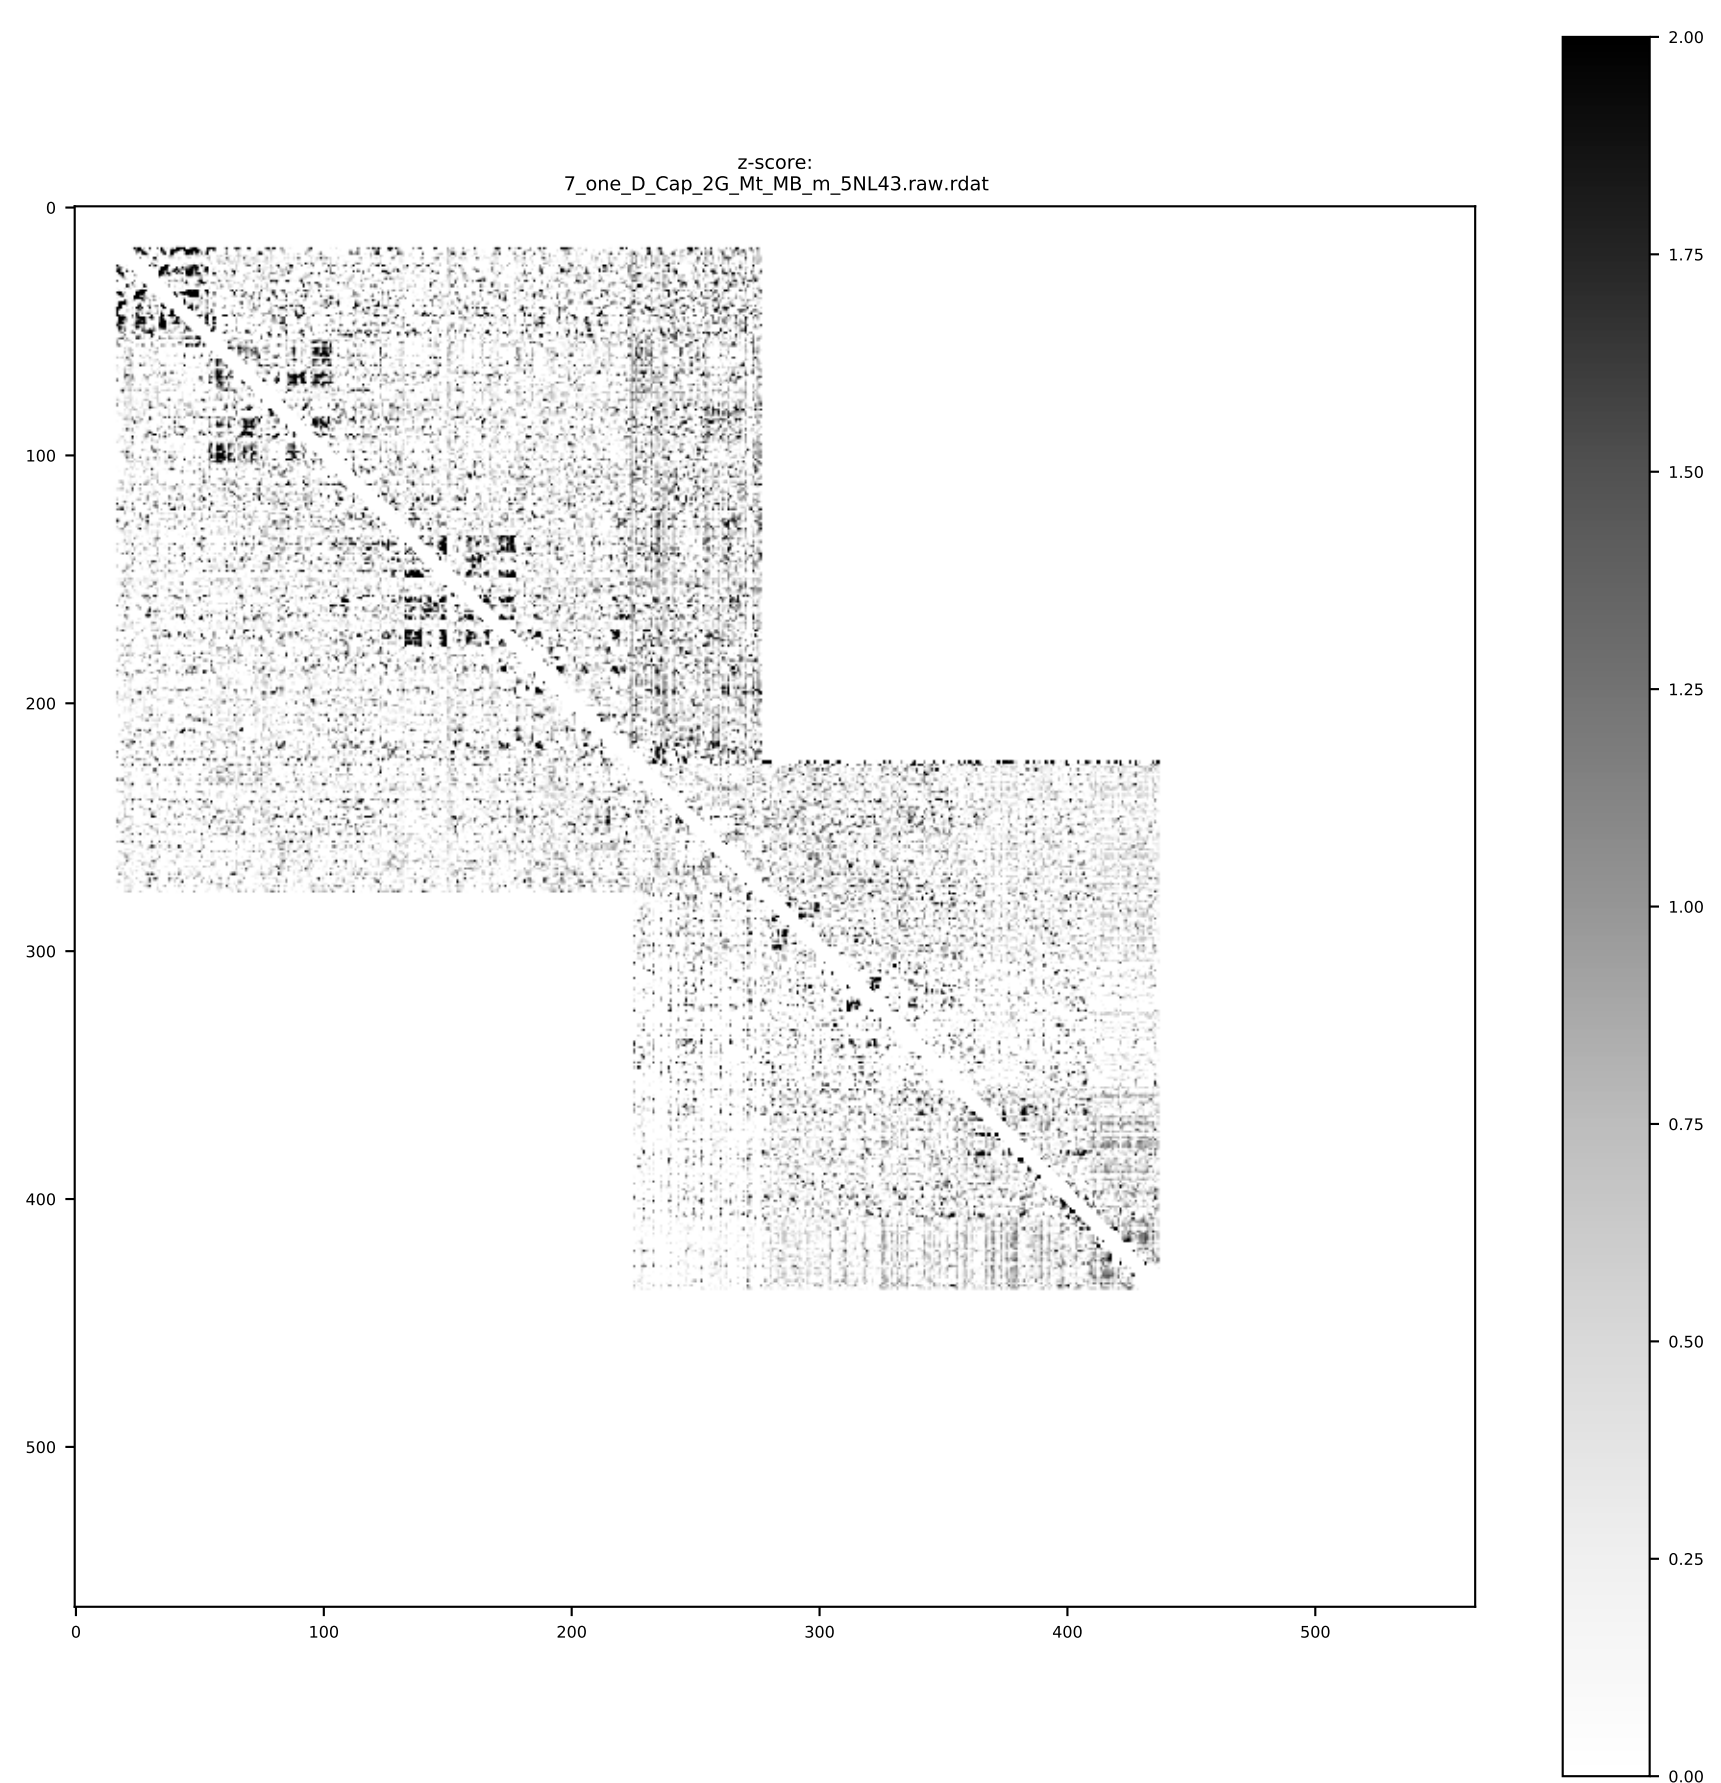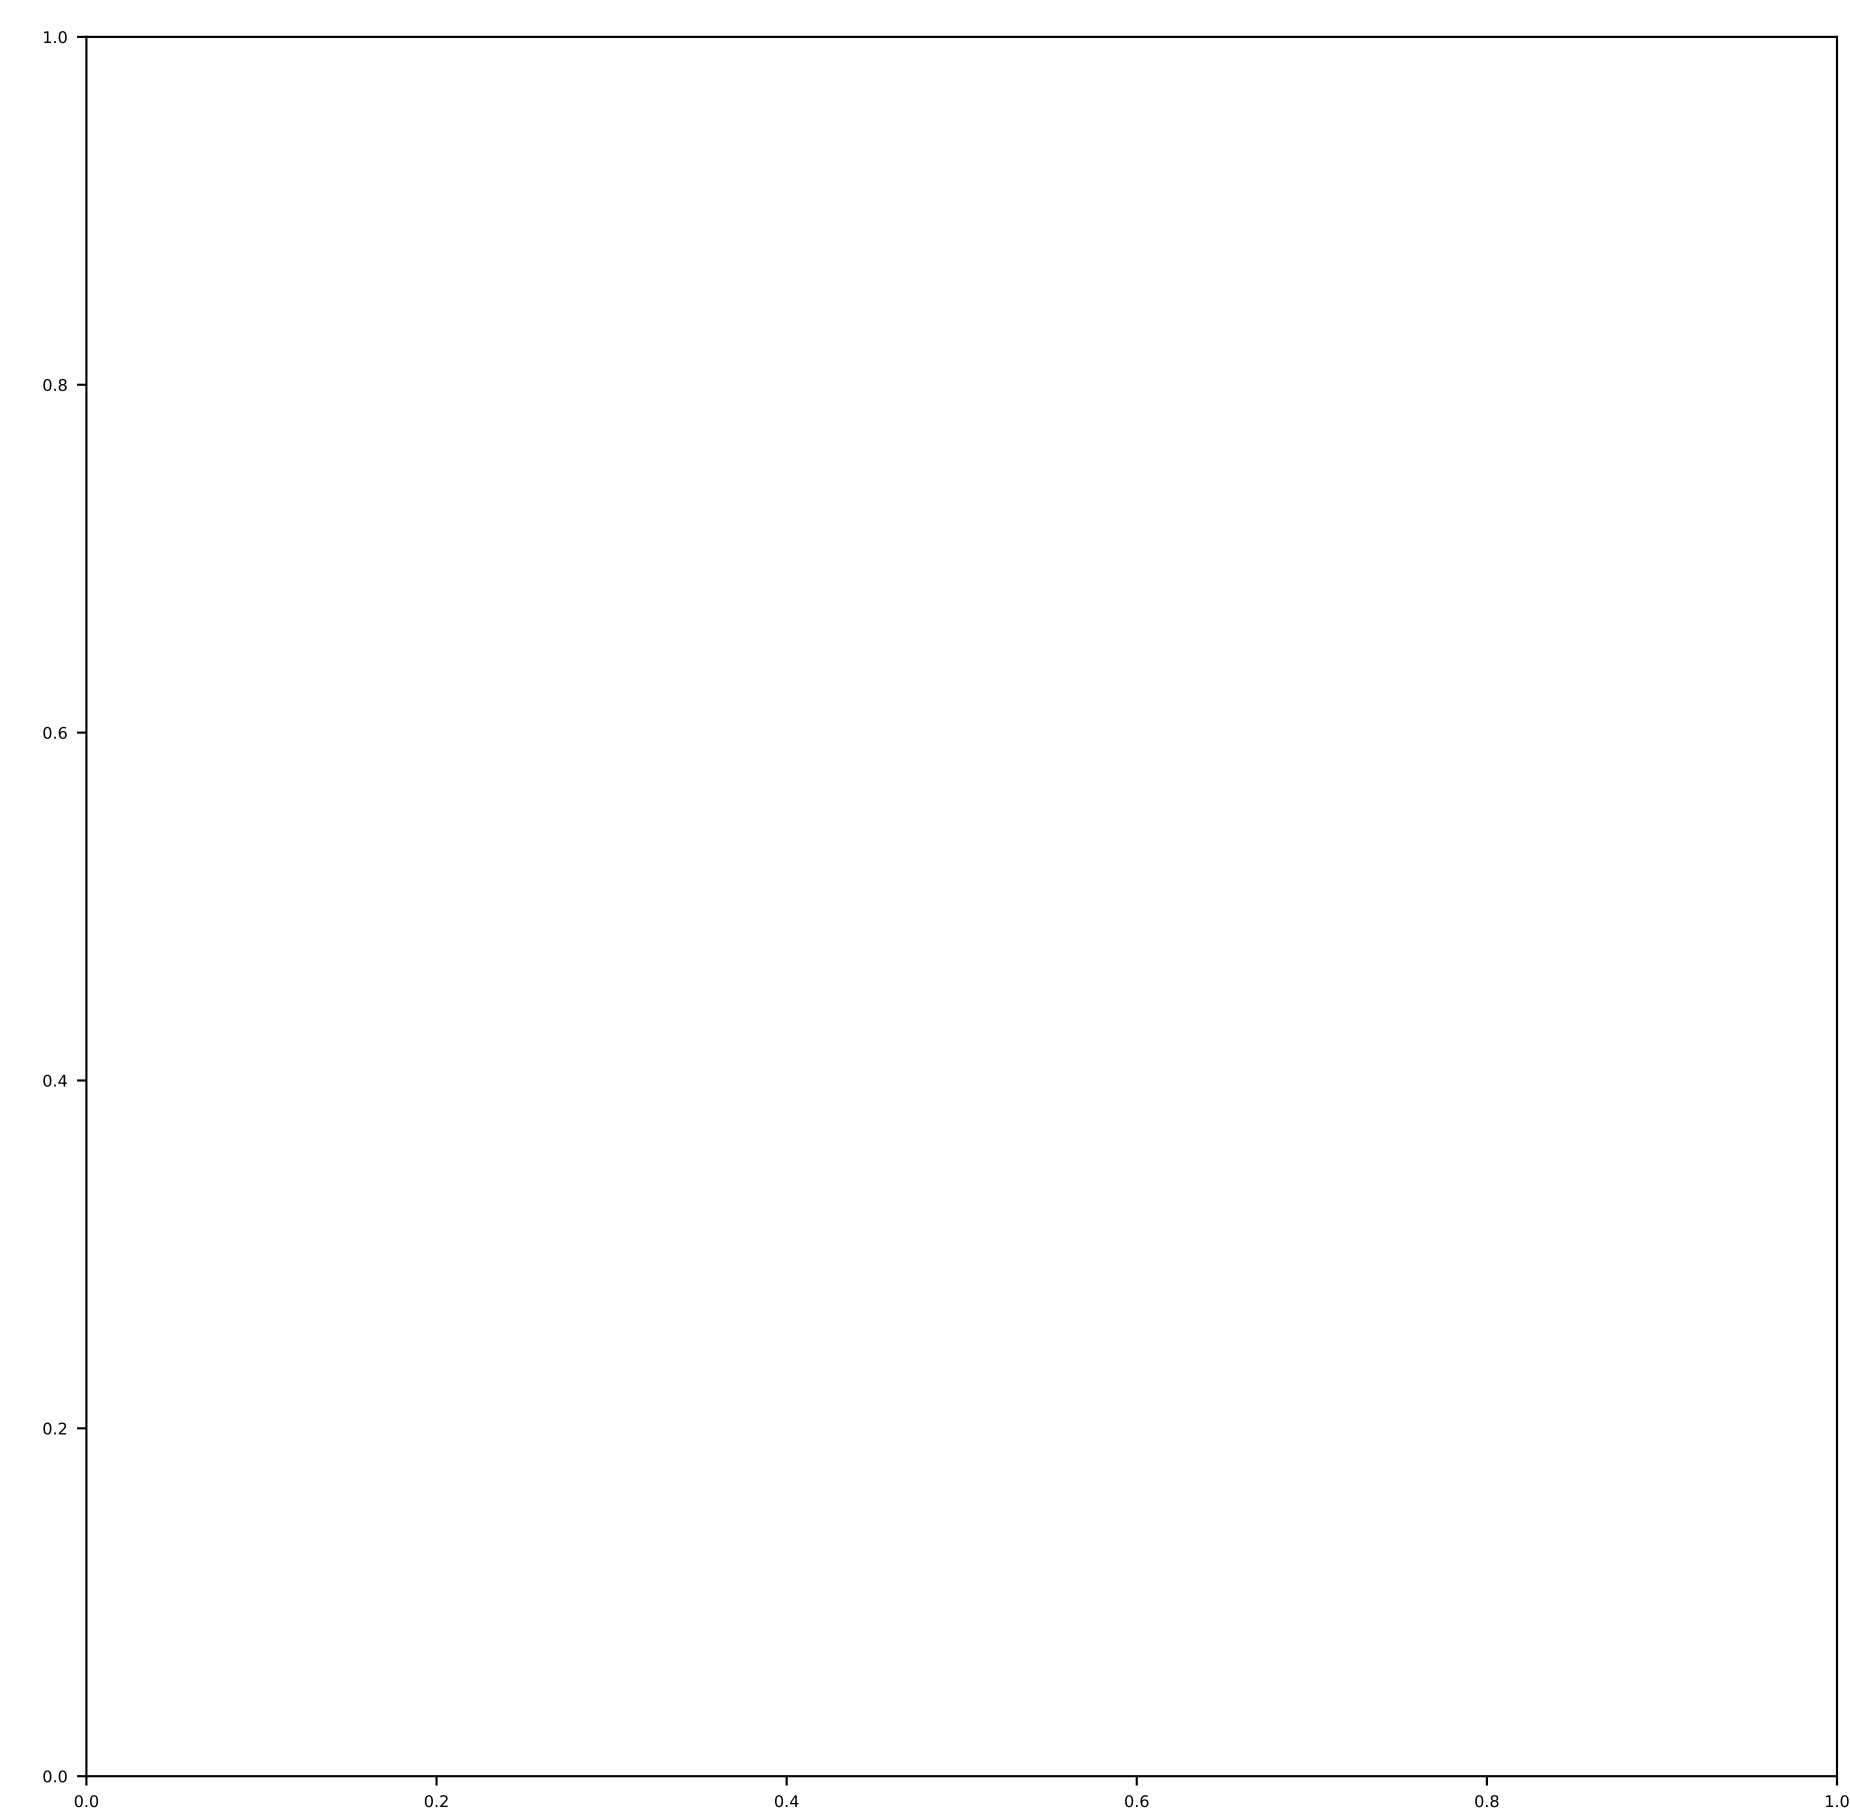

Supplement: Supplementary file 28 [file one_two_G_monomer_z_score.pdf › 2d-structure-inference/z_score/one_two_G_monomer_z_score.pdf]

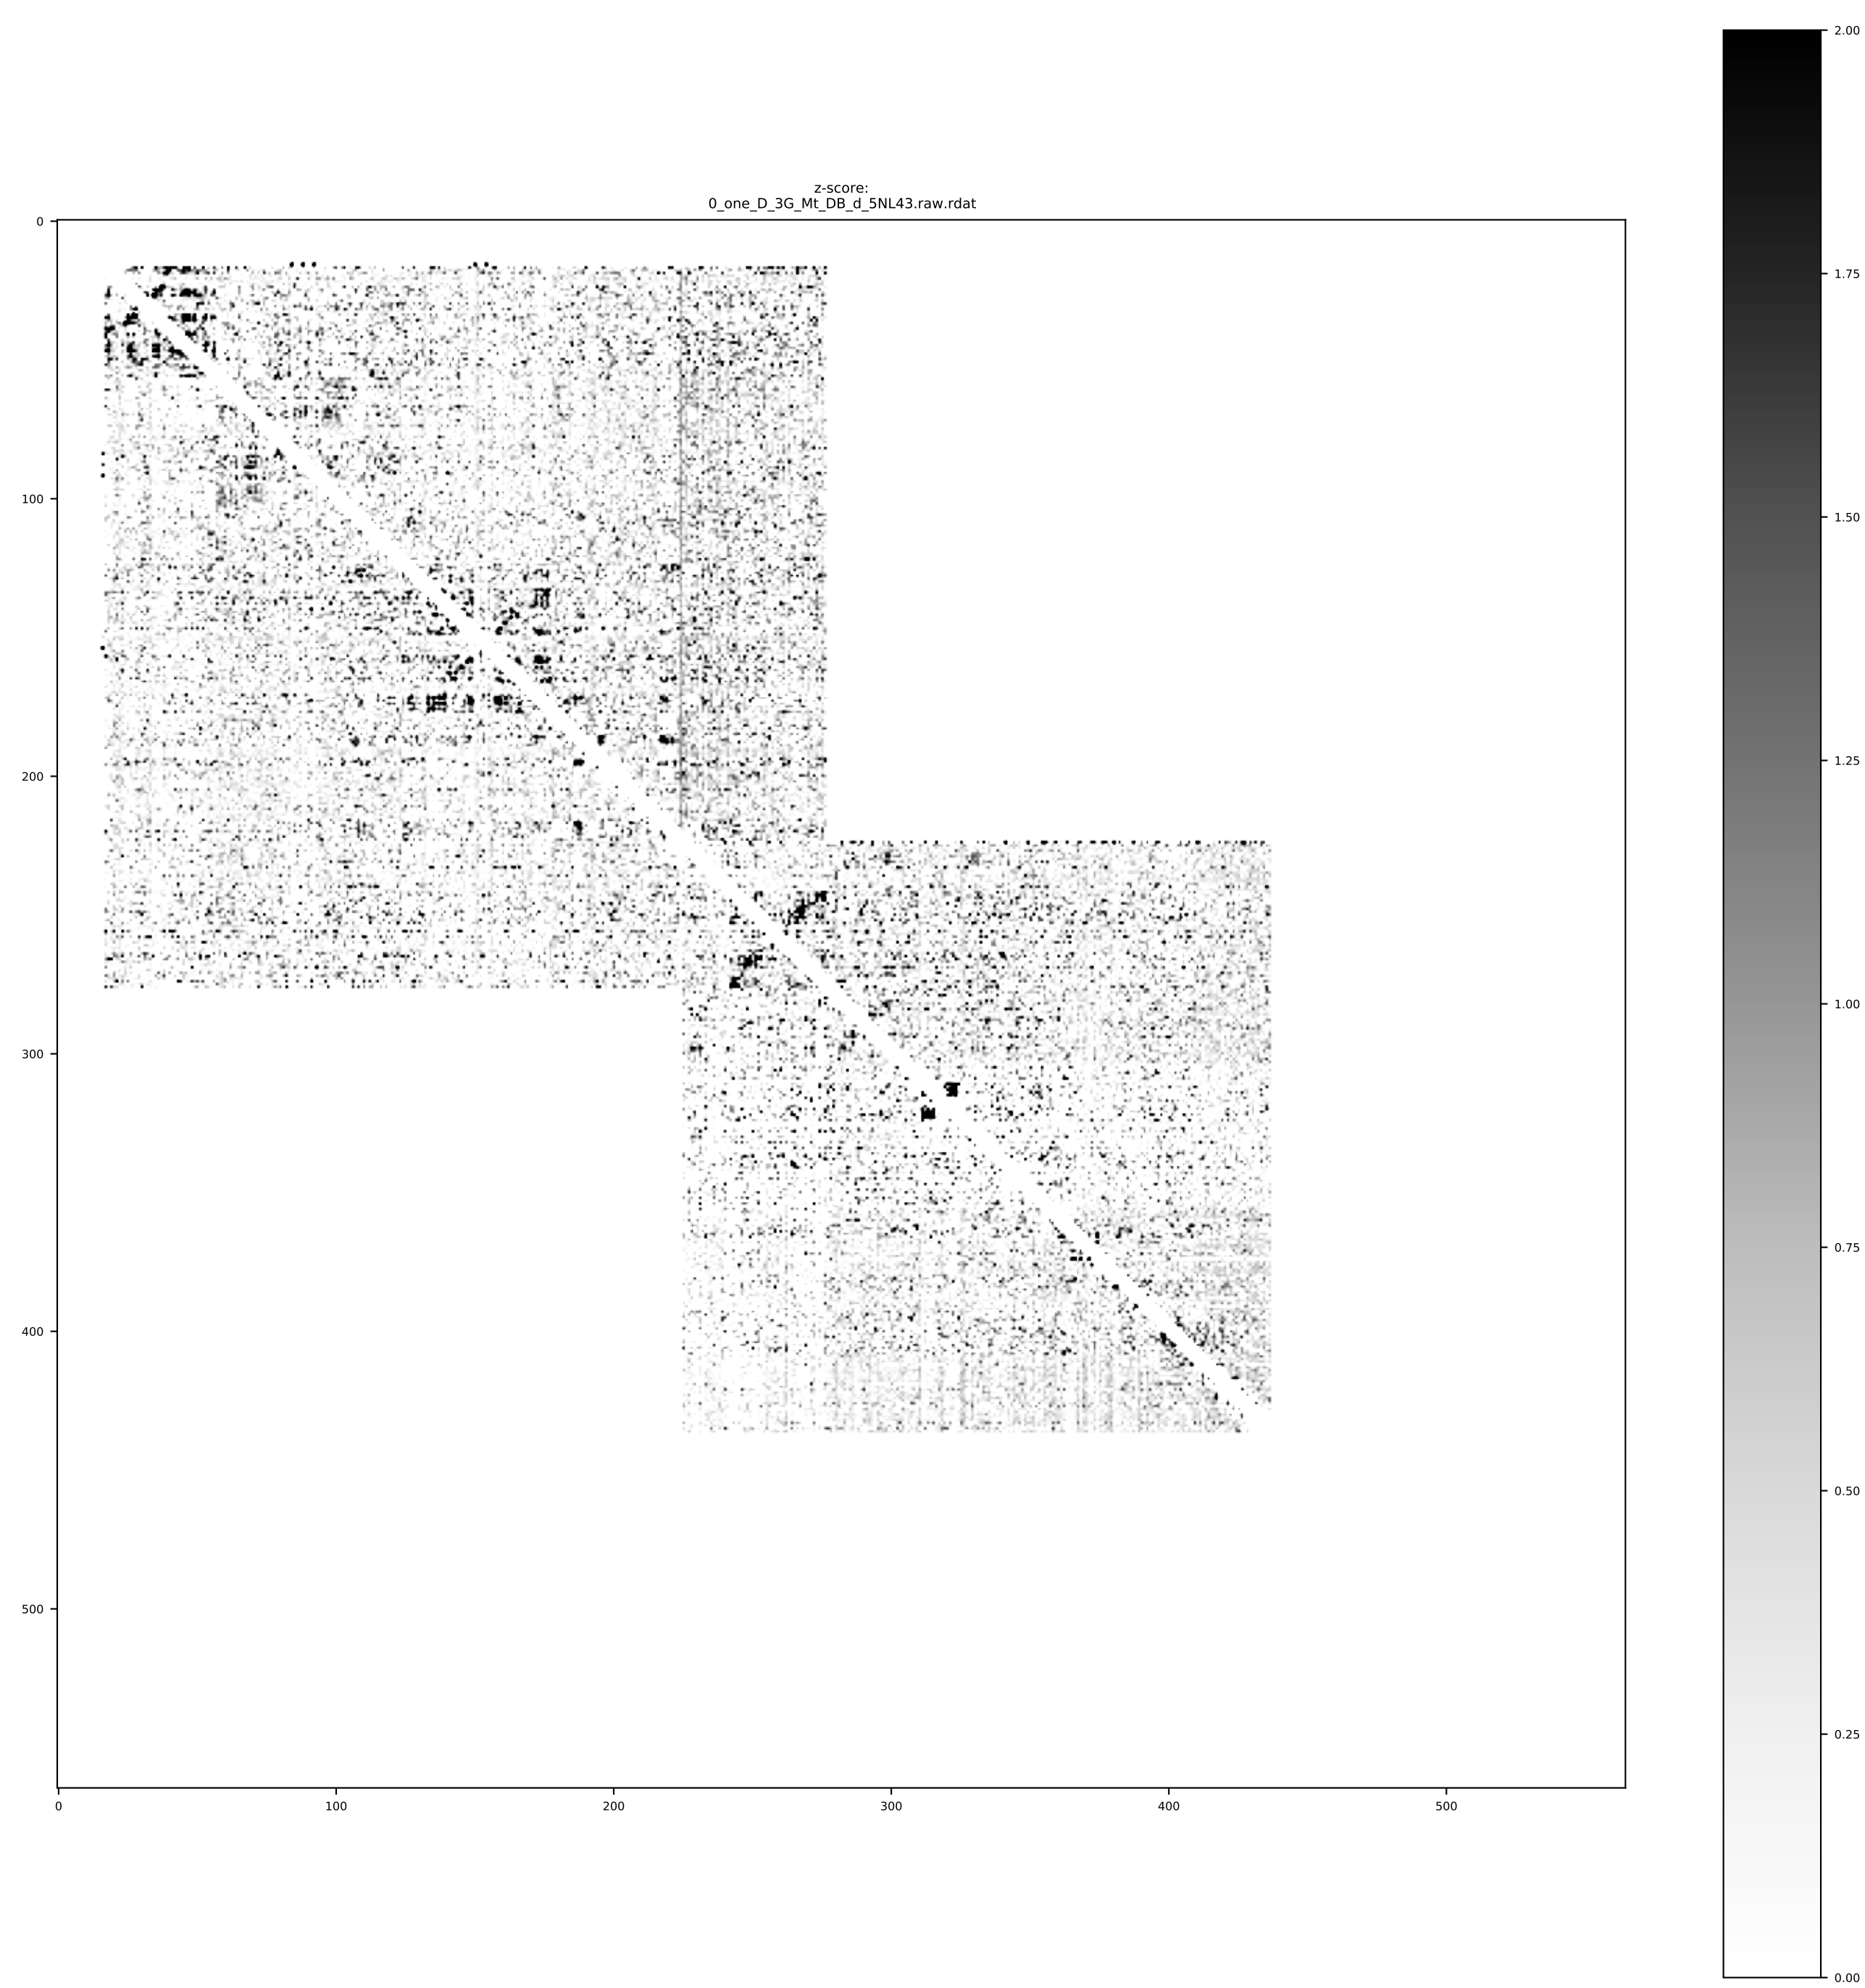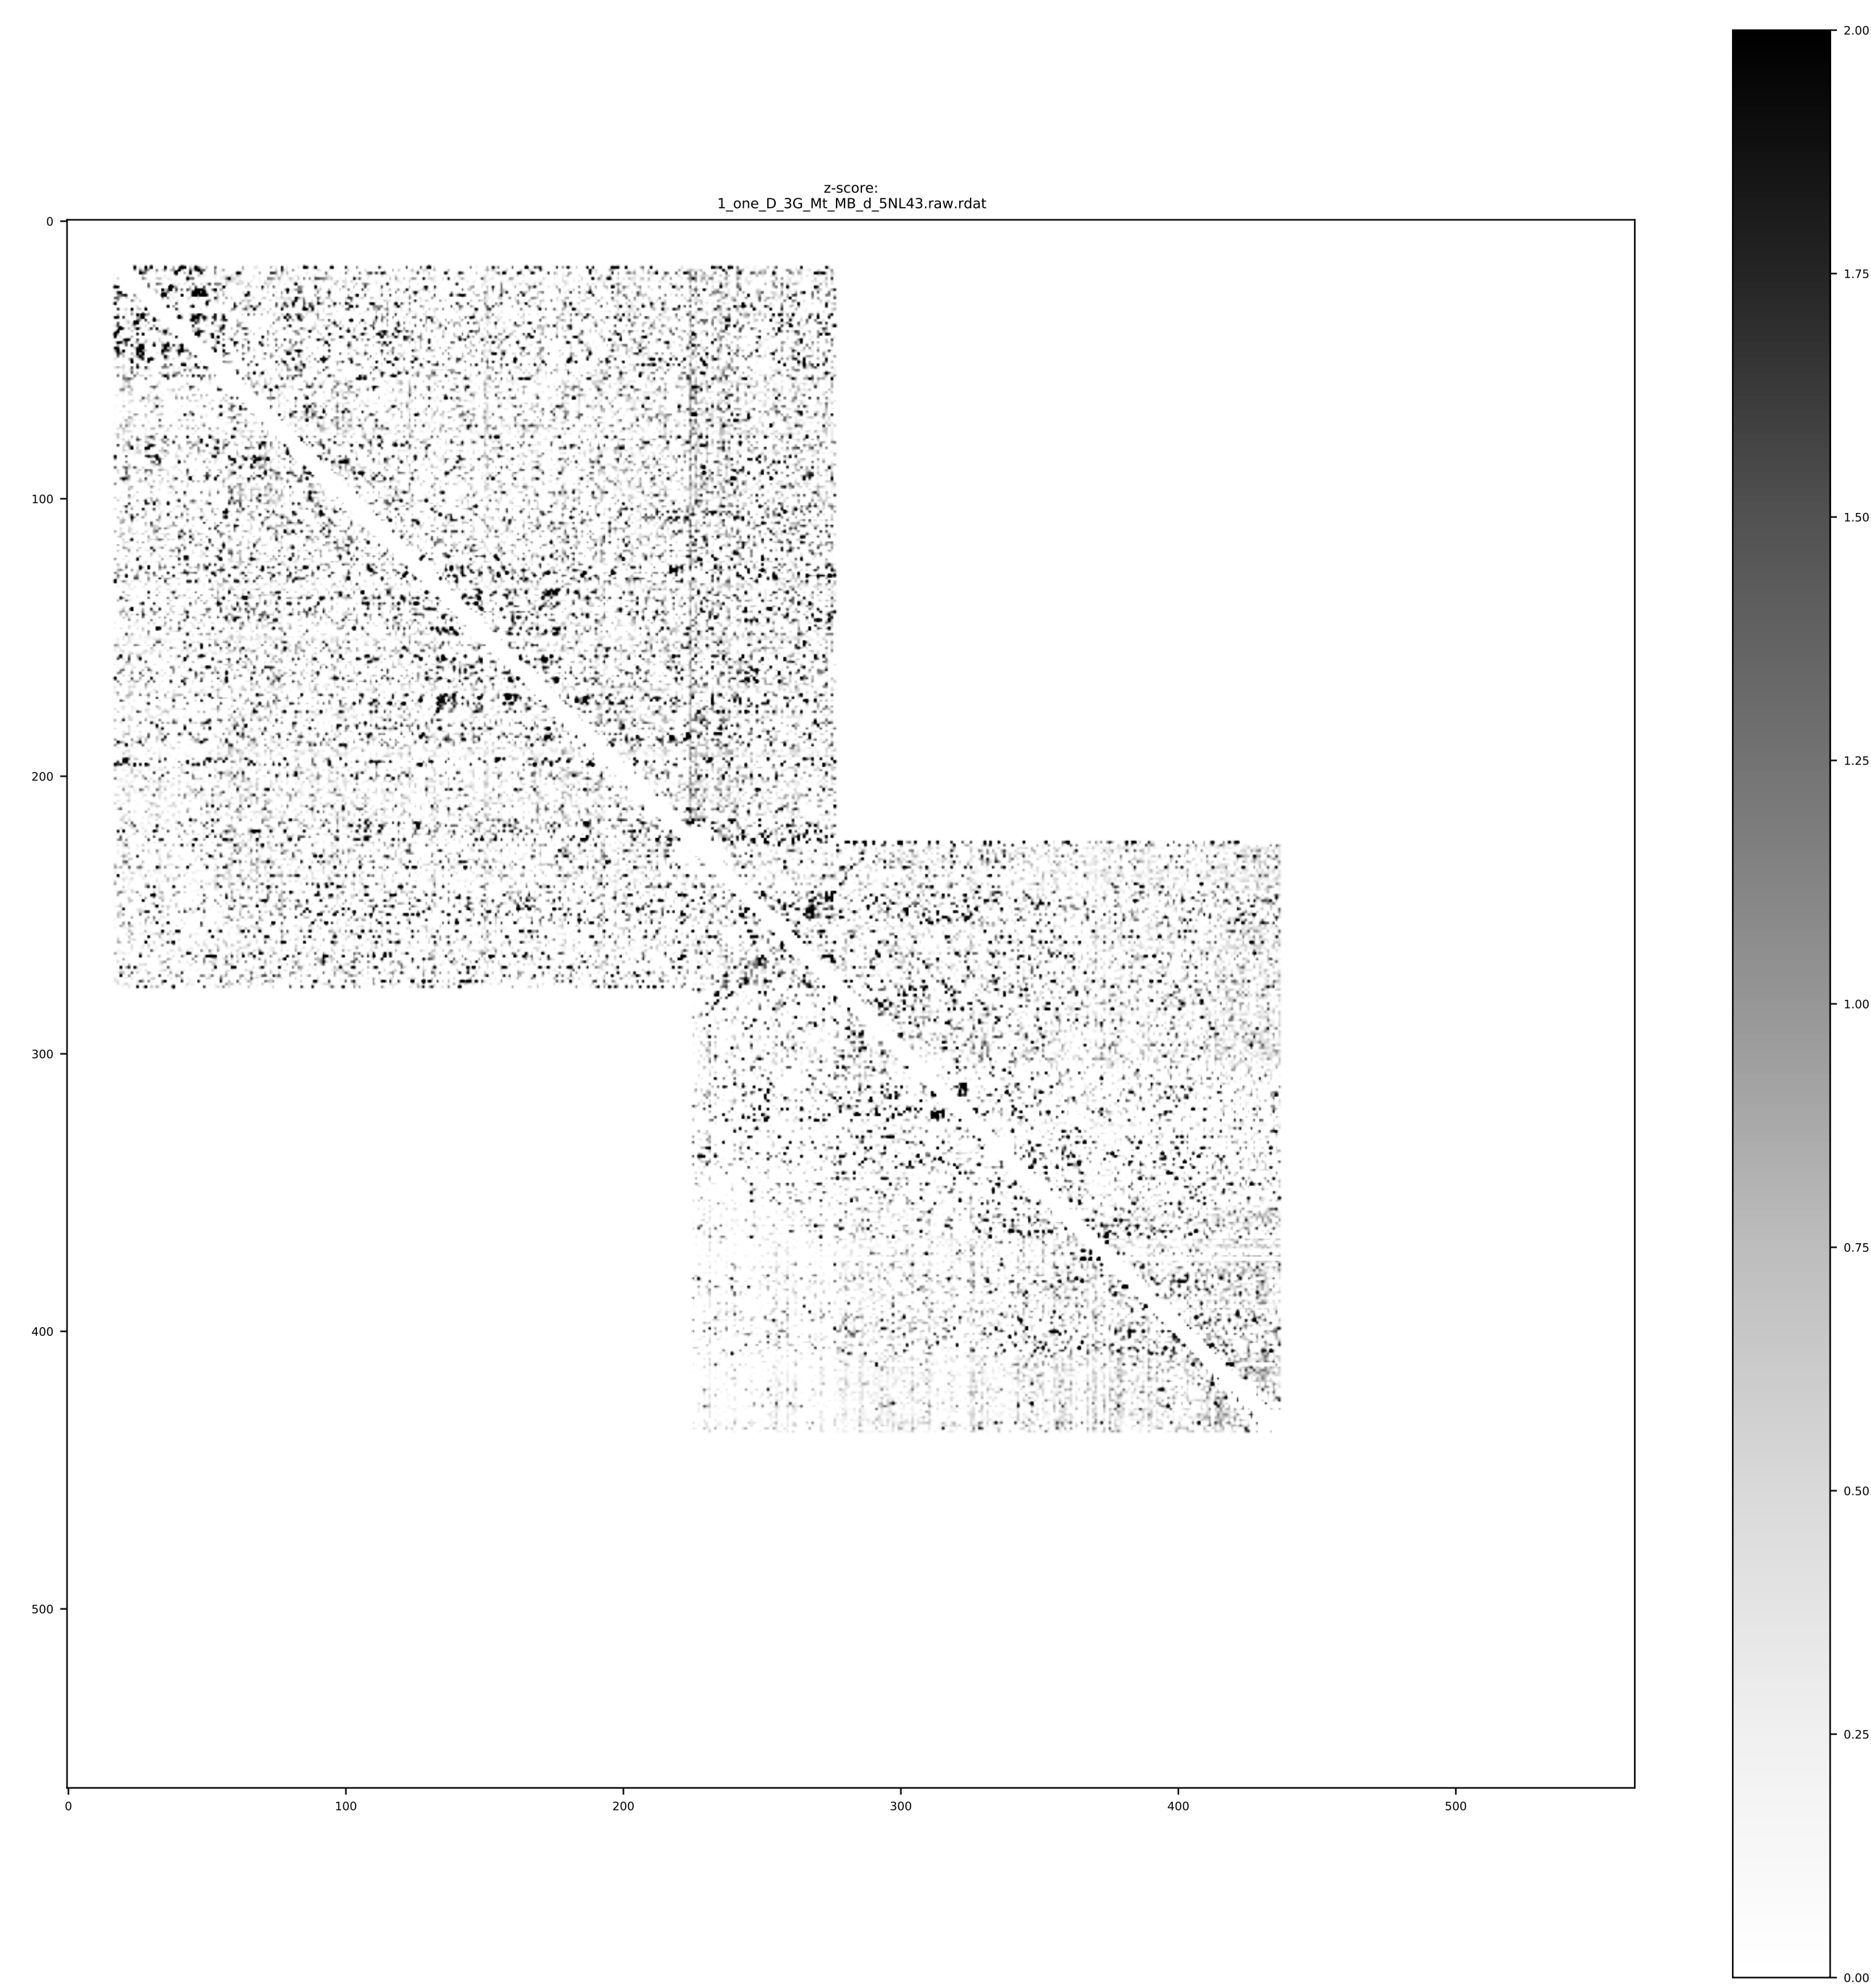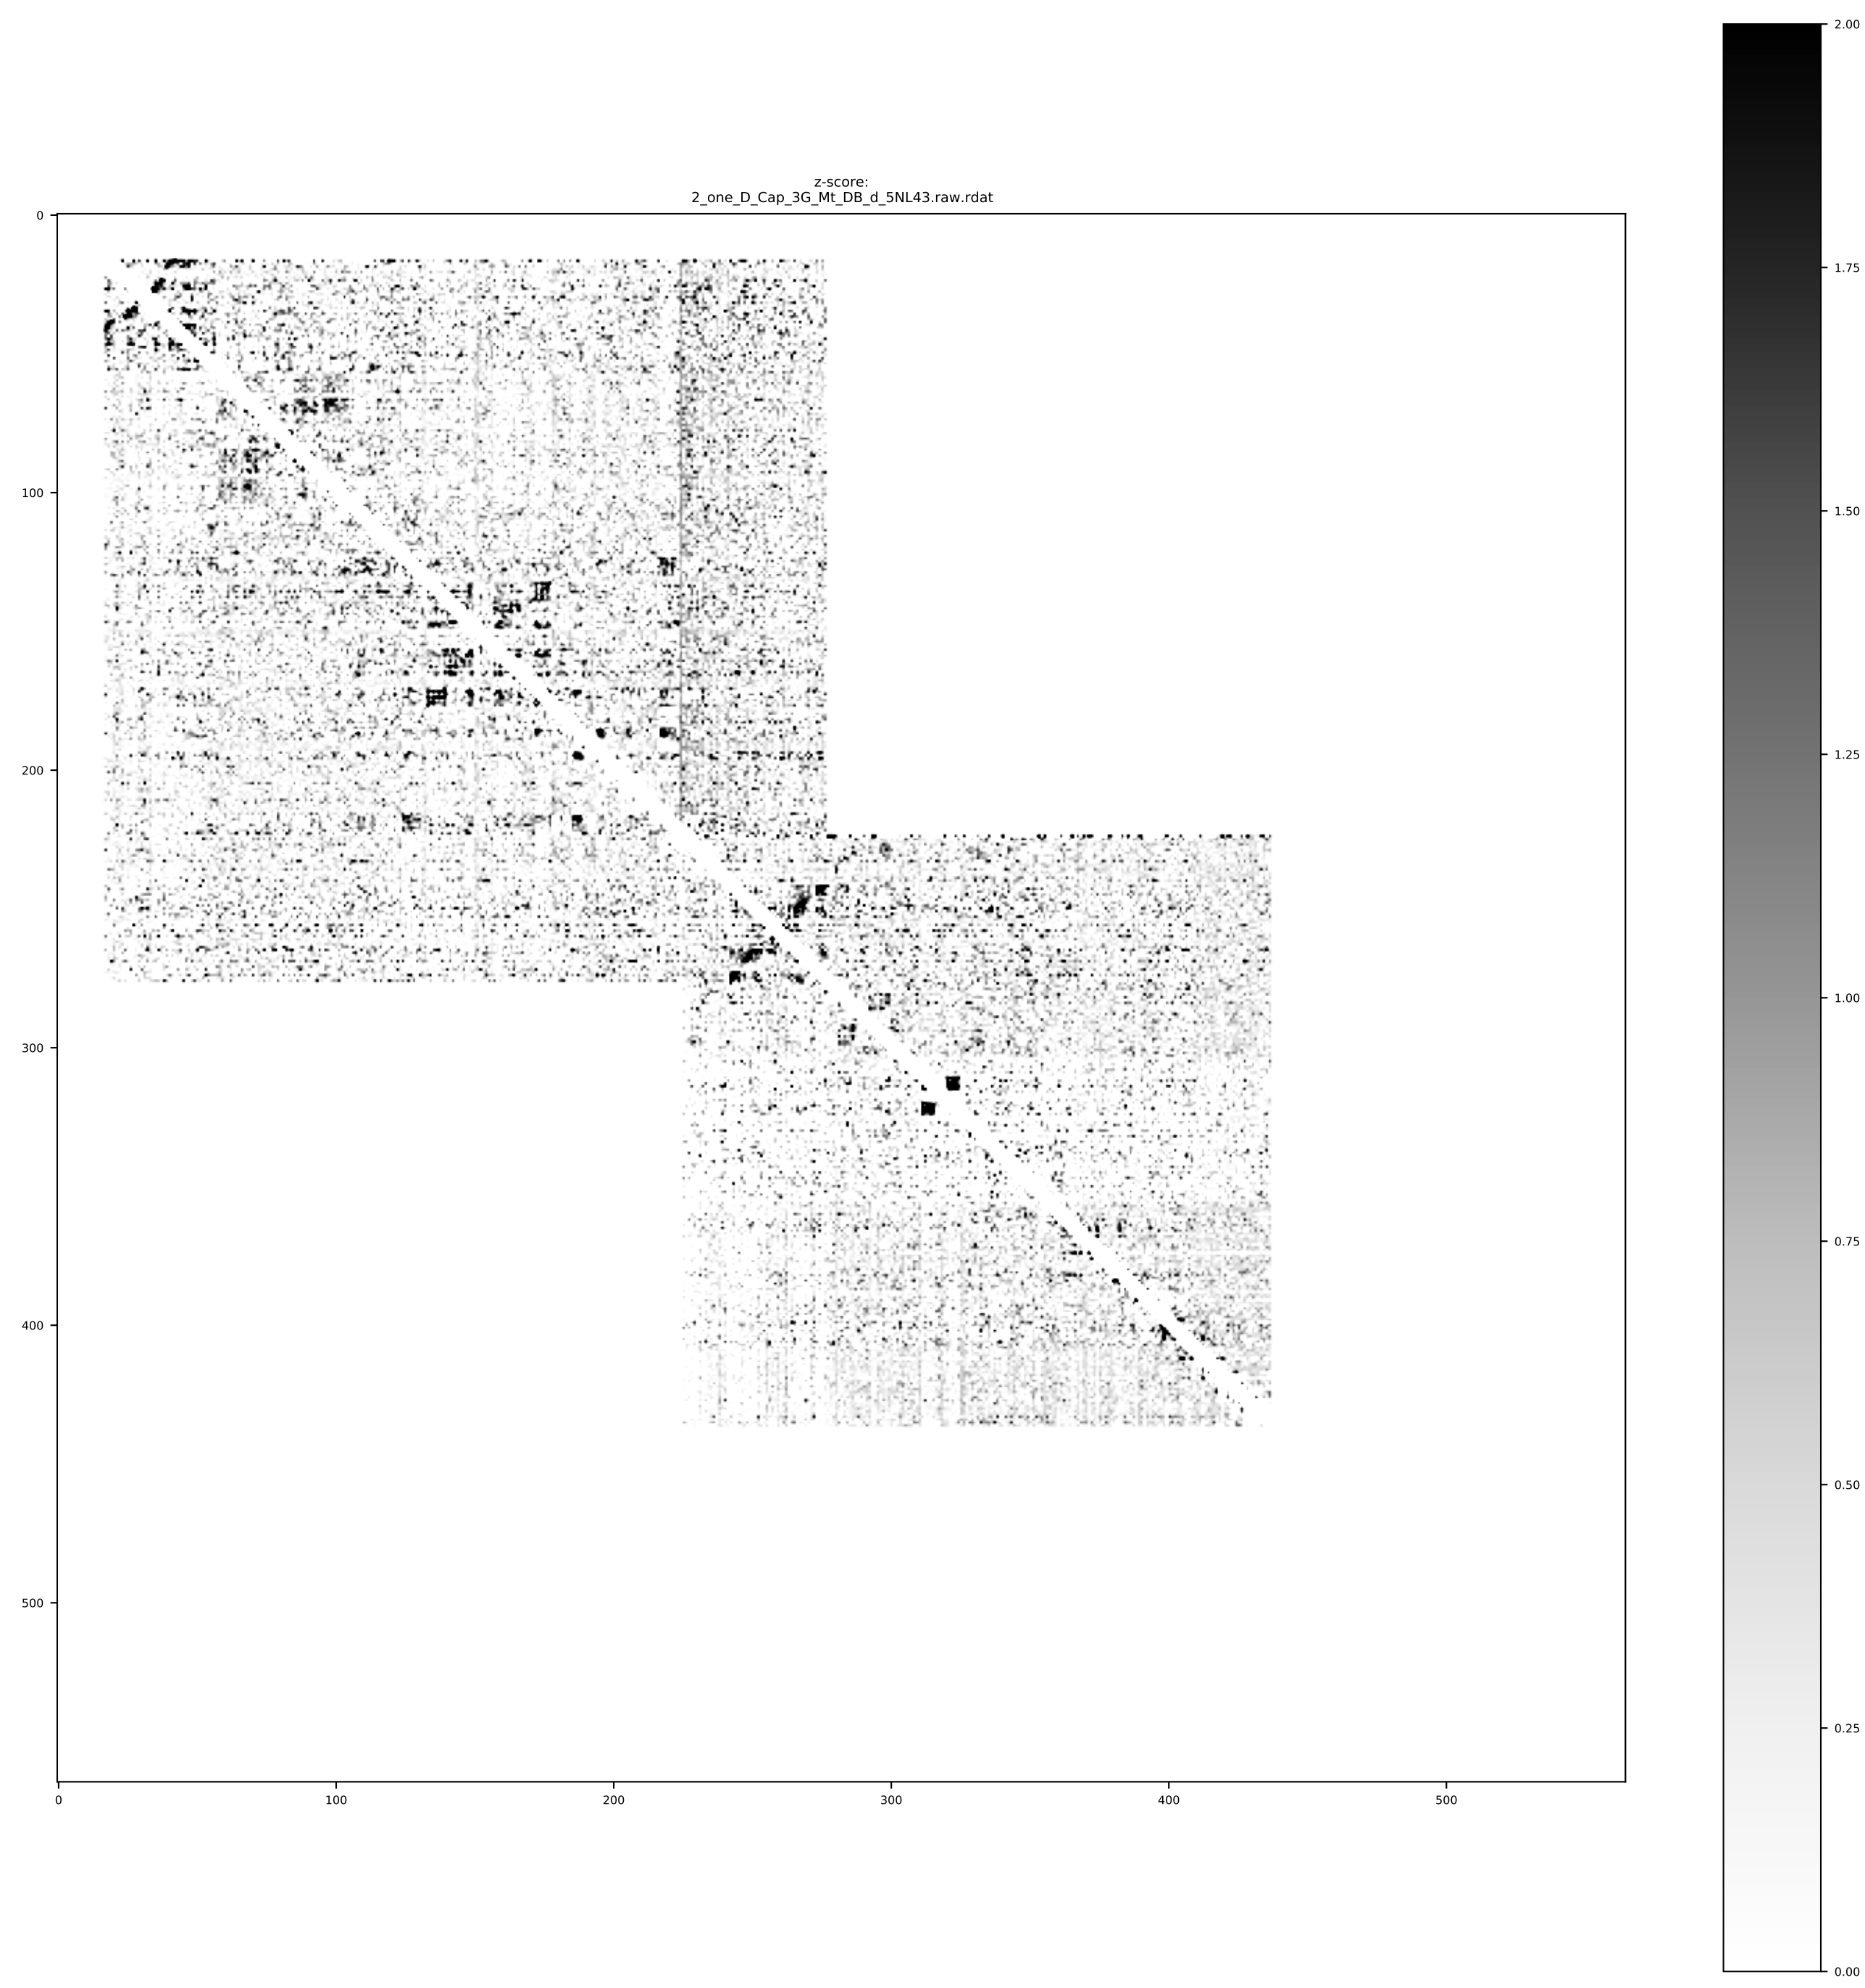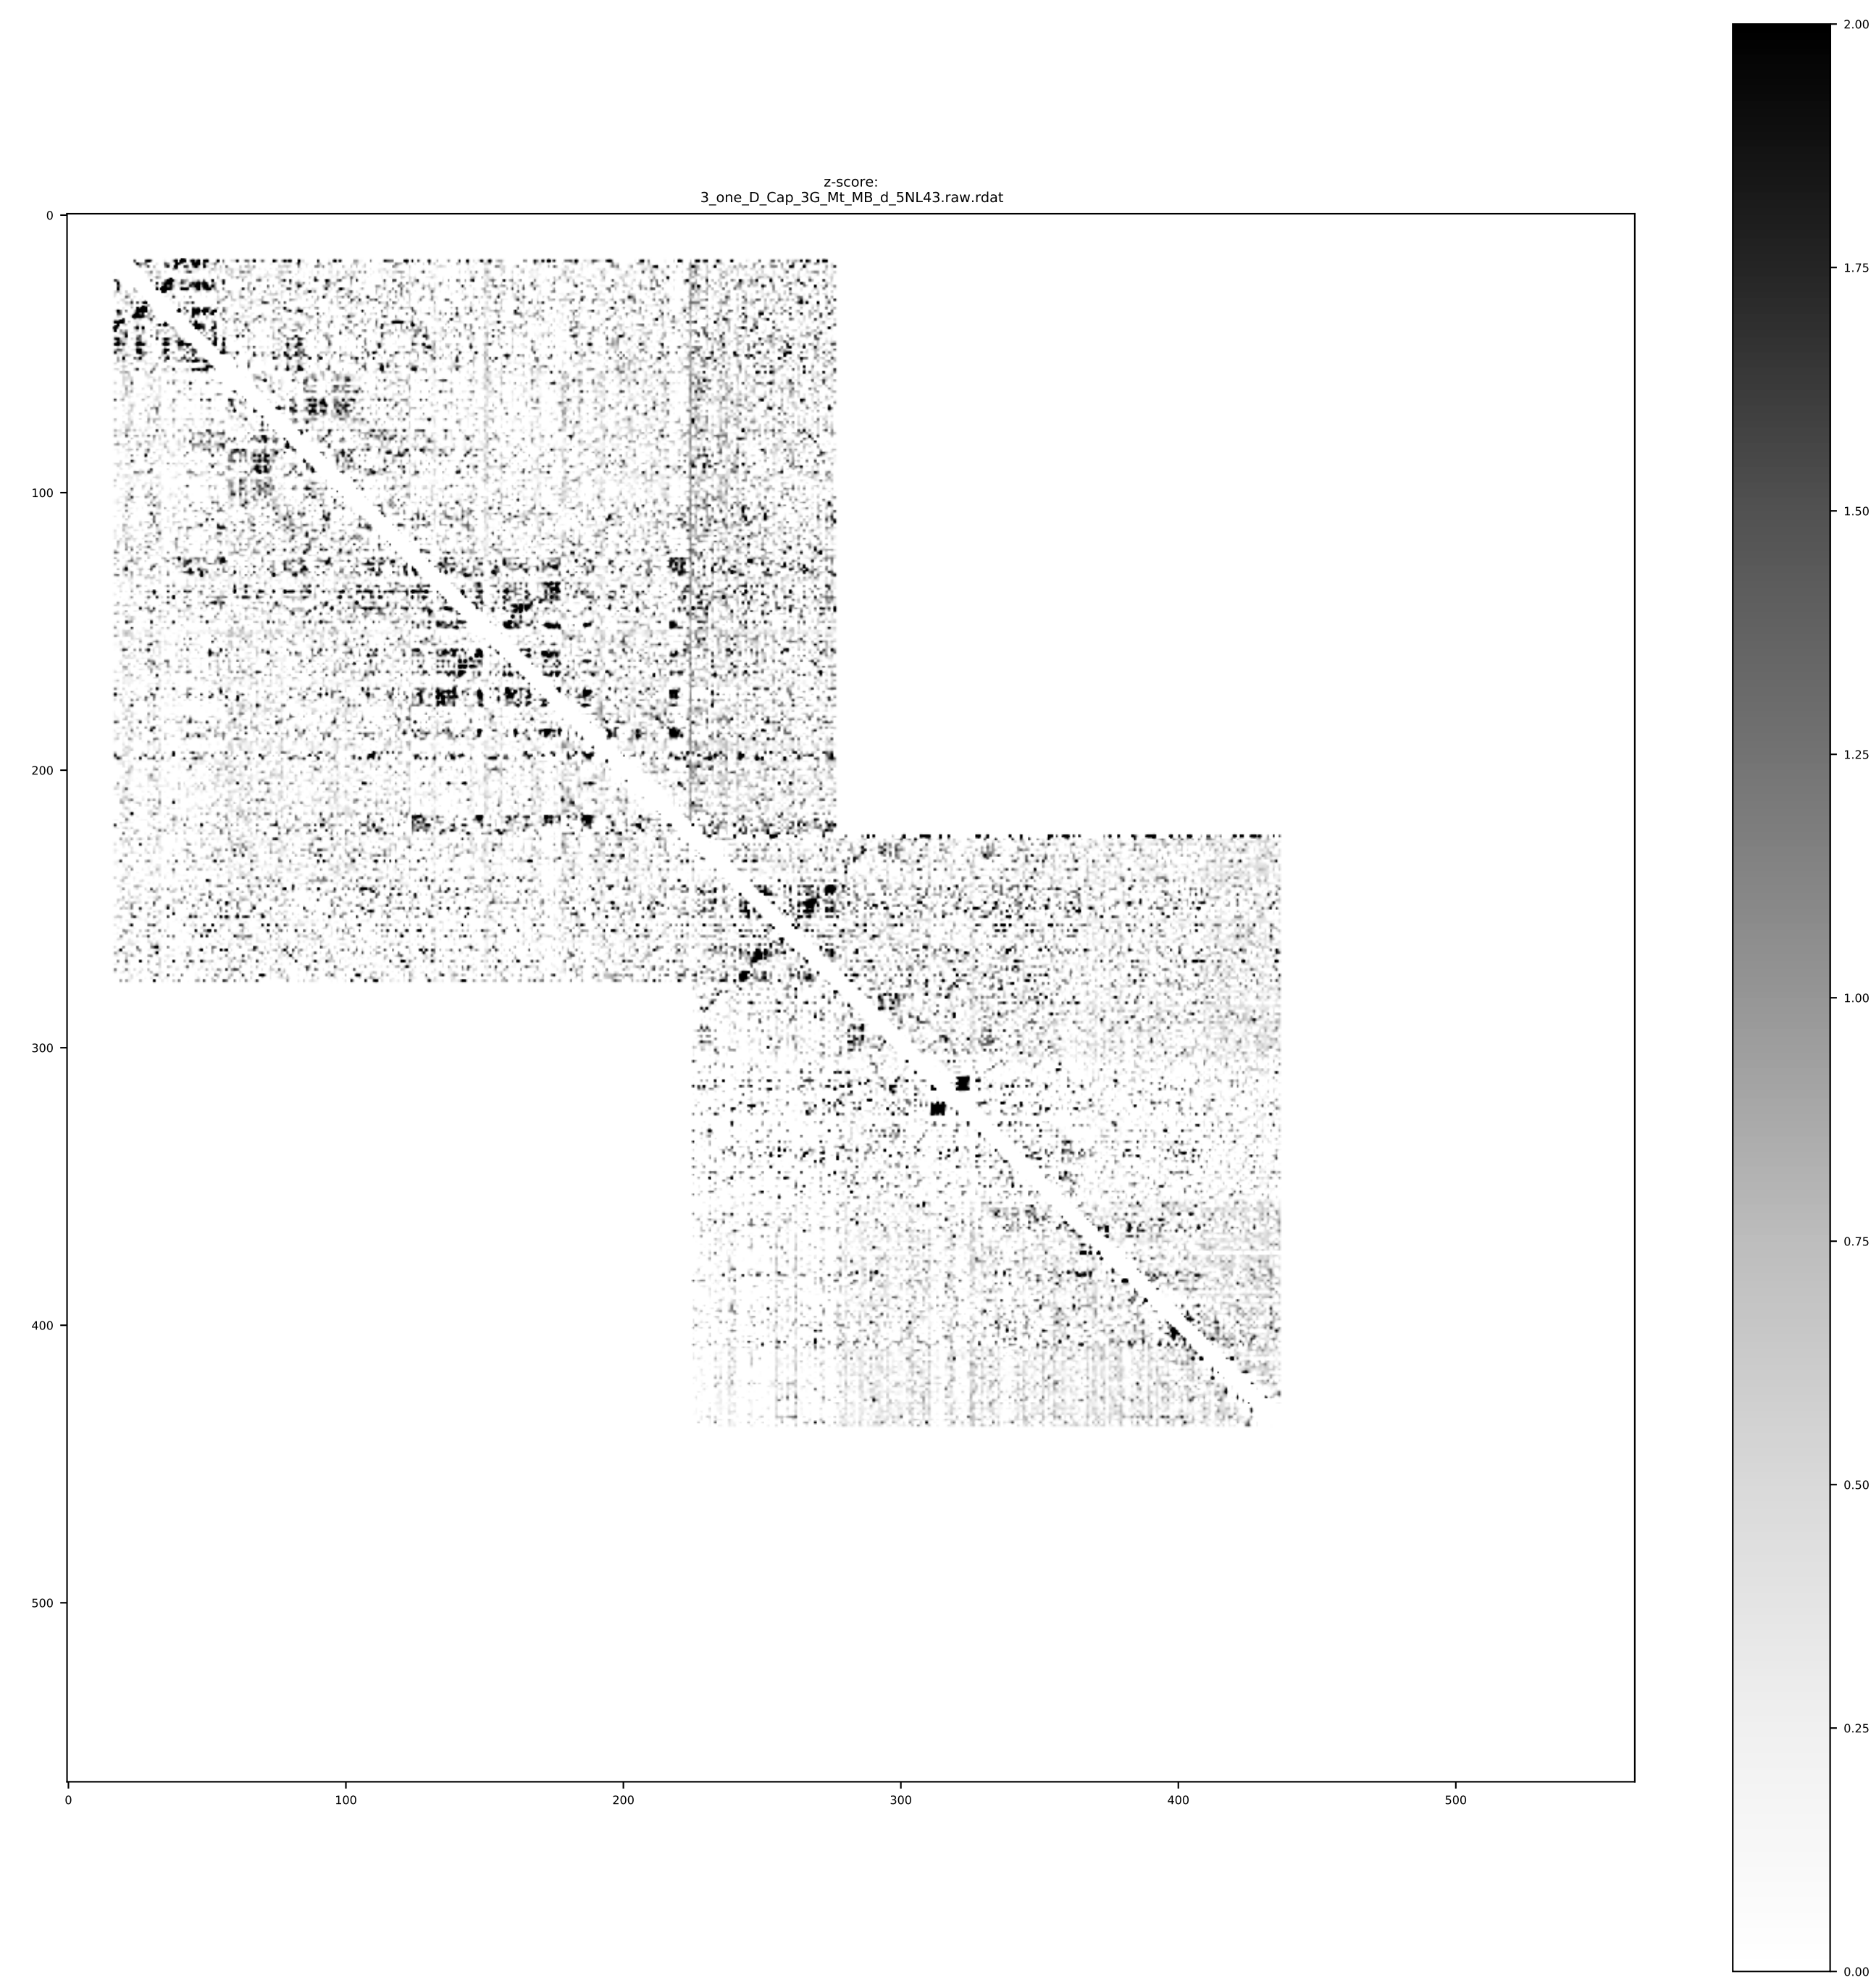

Supplement: Supplementary file 29 [file threeG_dimer_z_score.pdf › 2d-structure-inference/z_score/threeG_dimer_z_score.pdf]

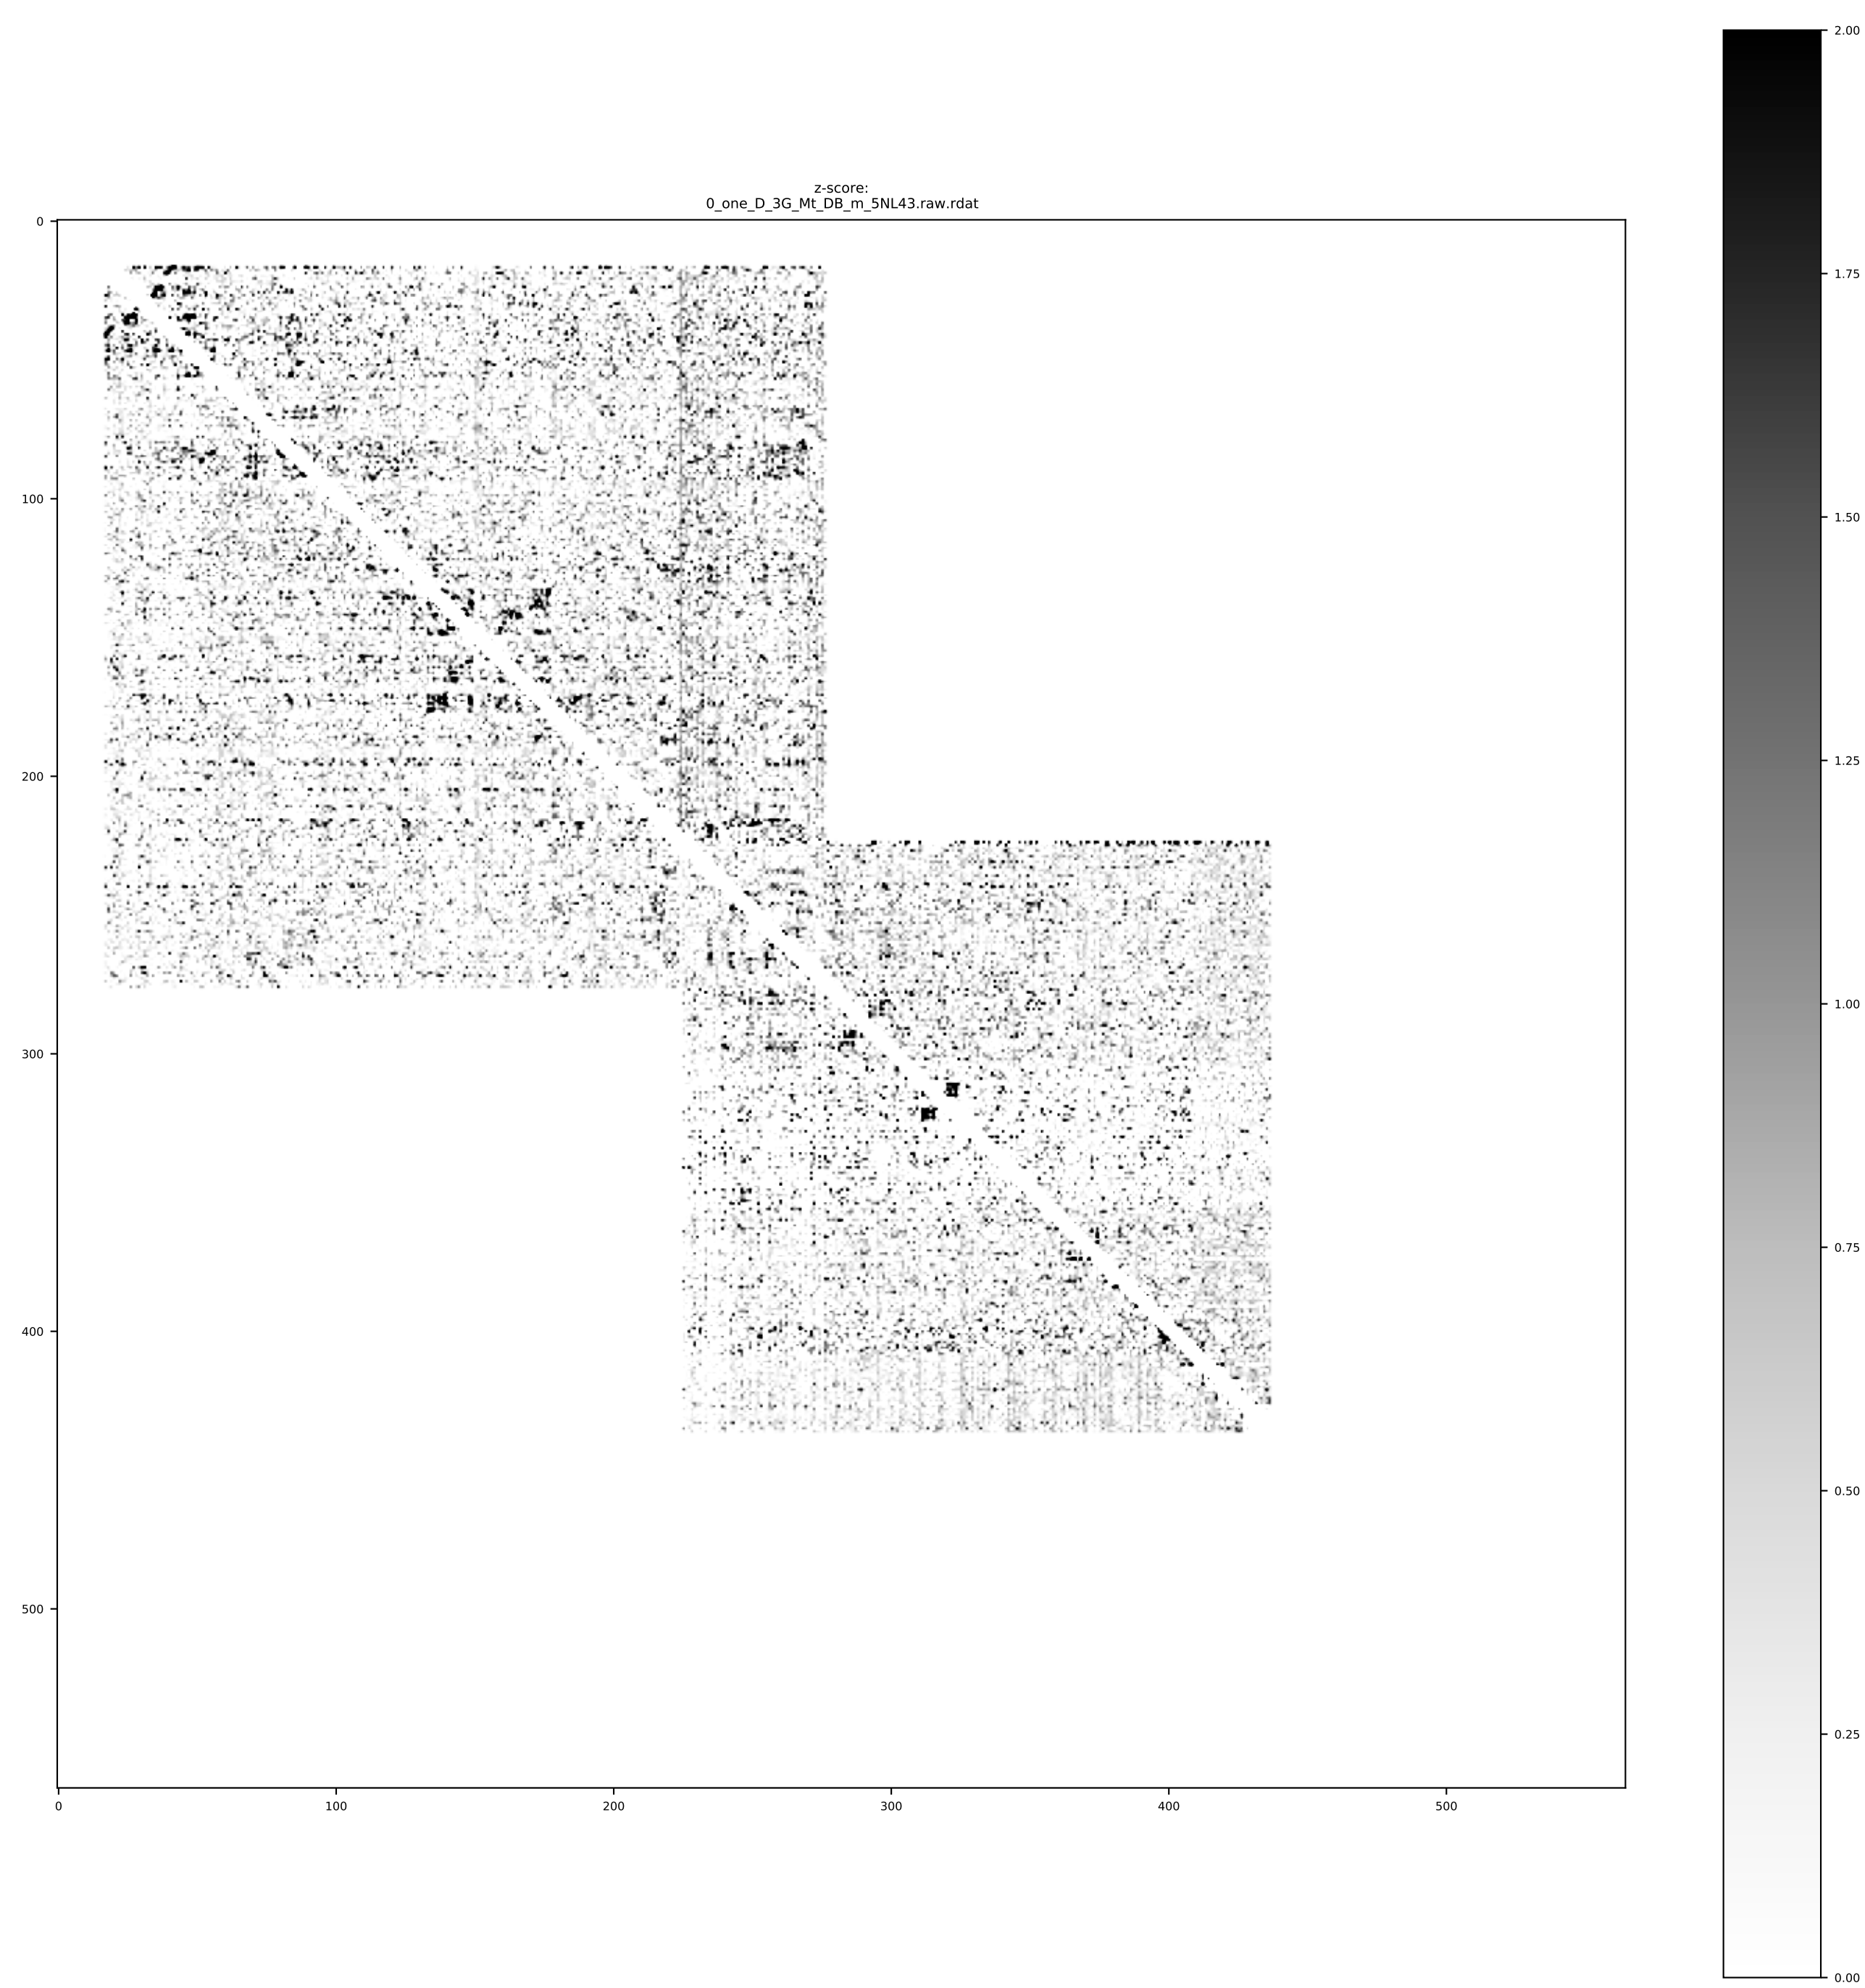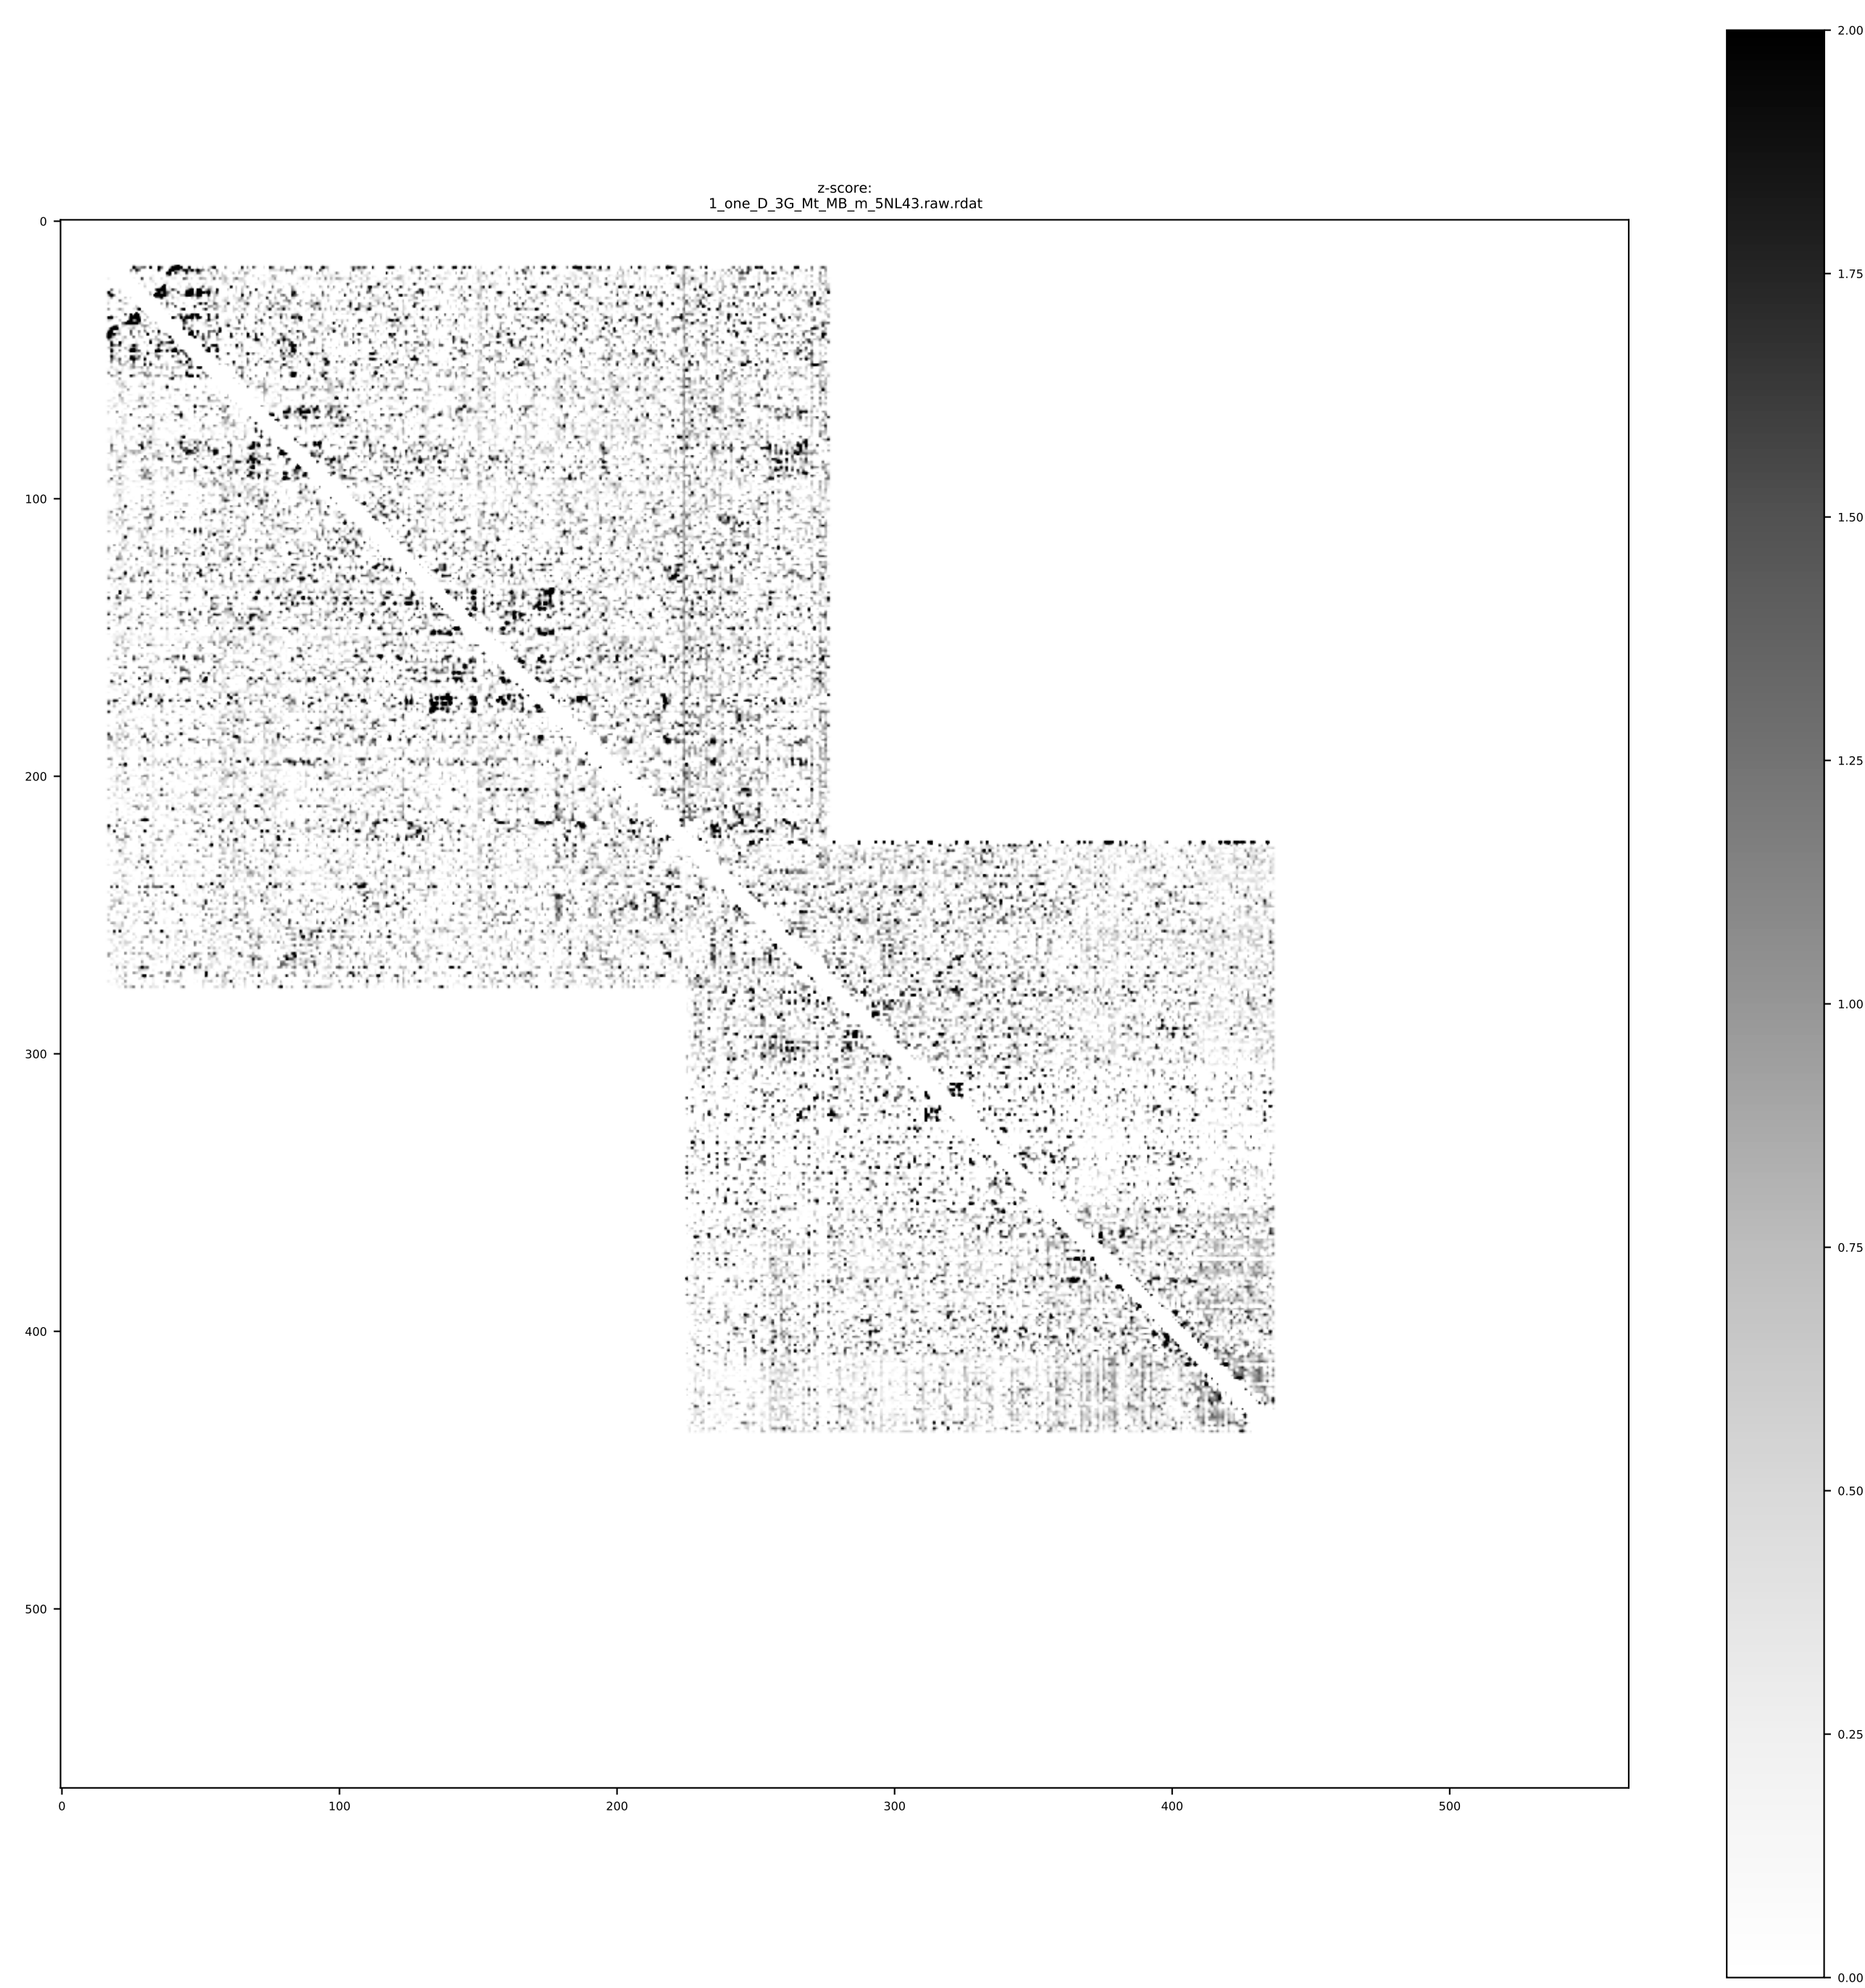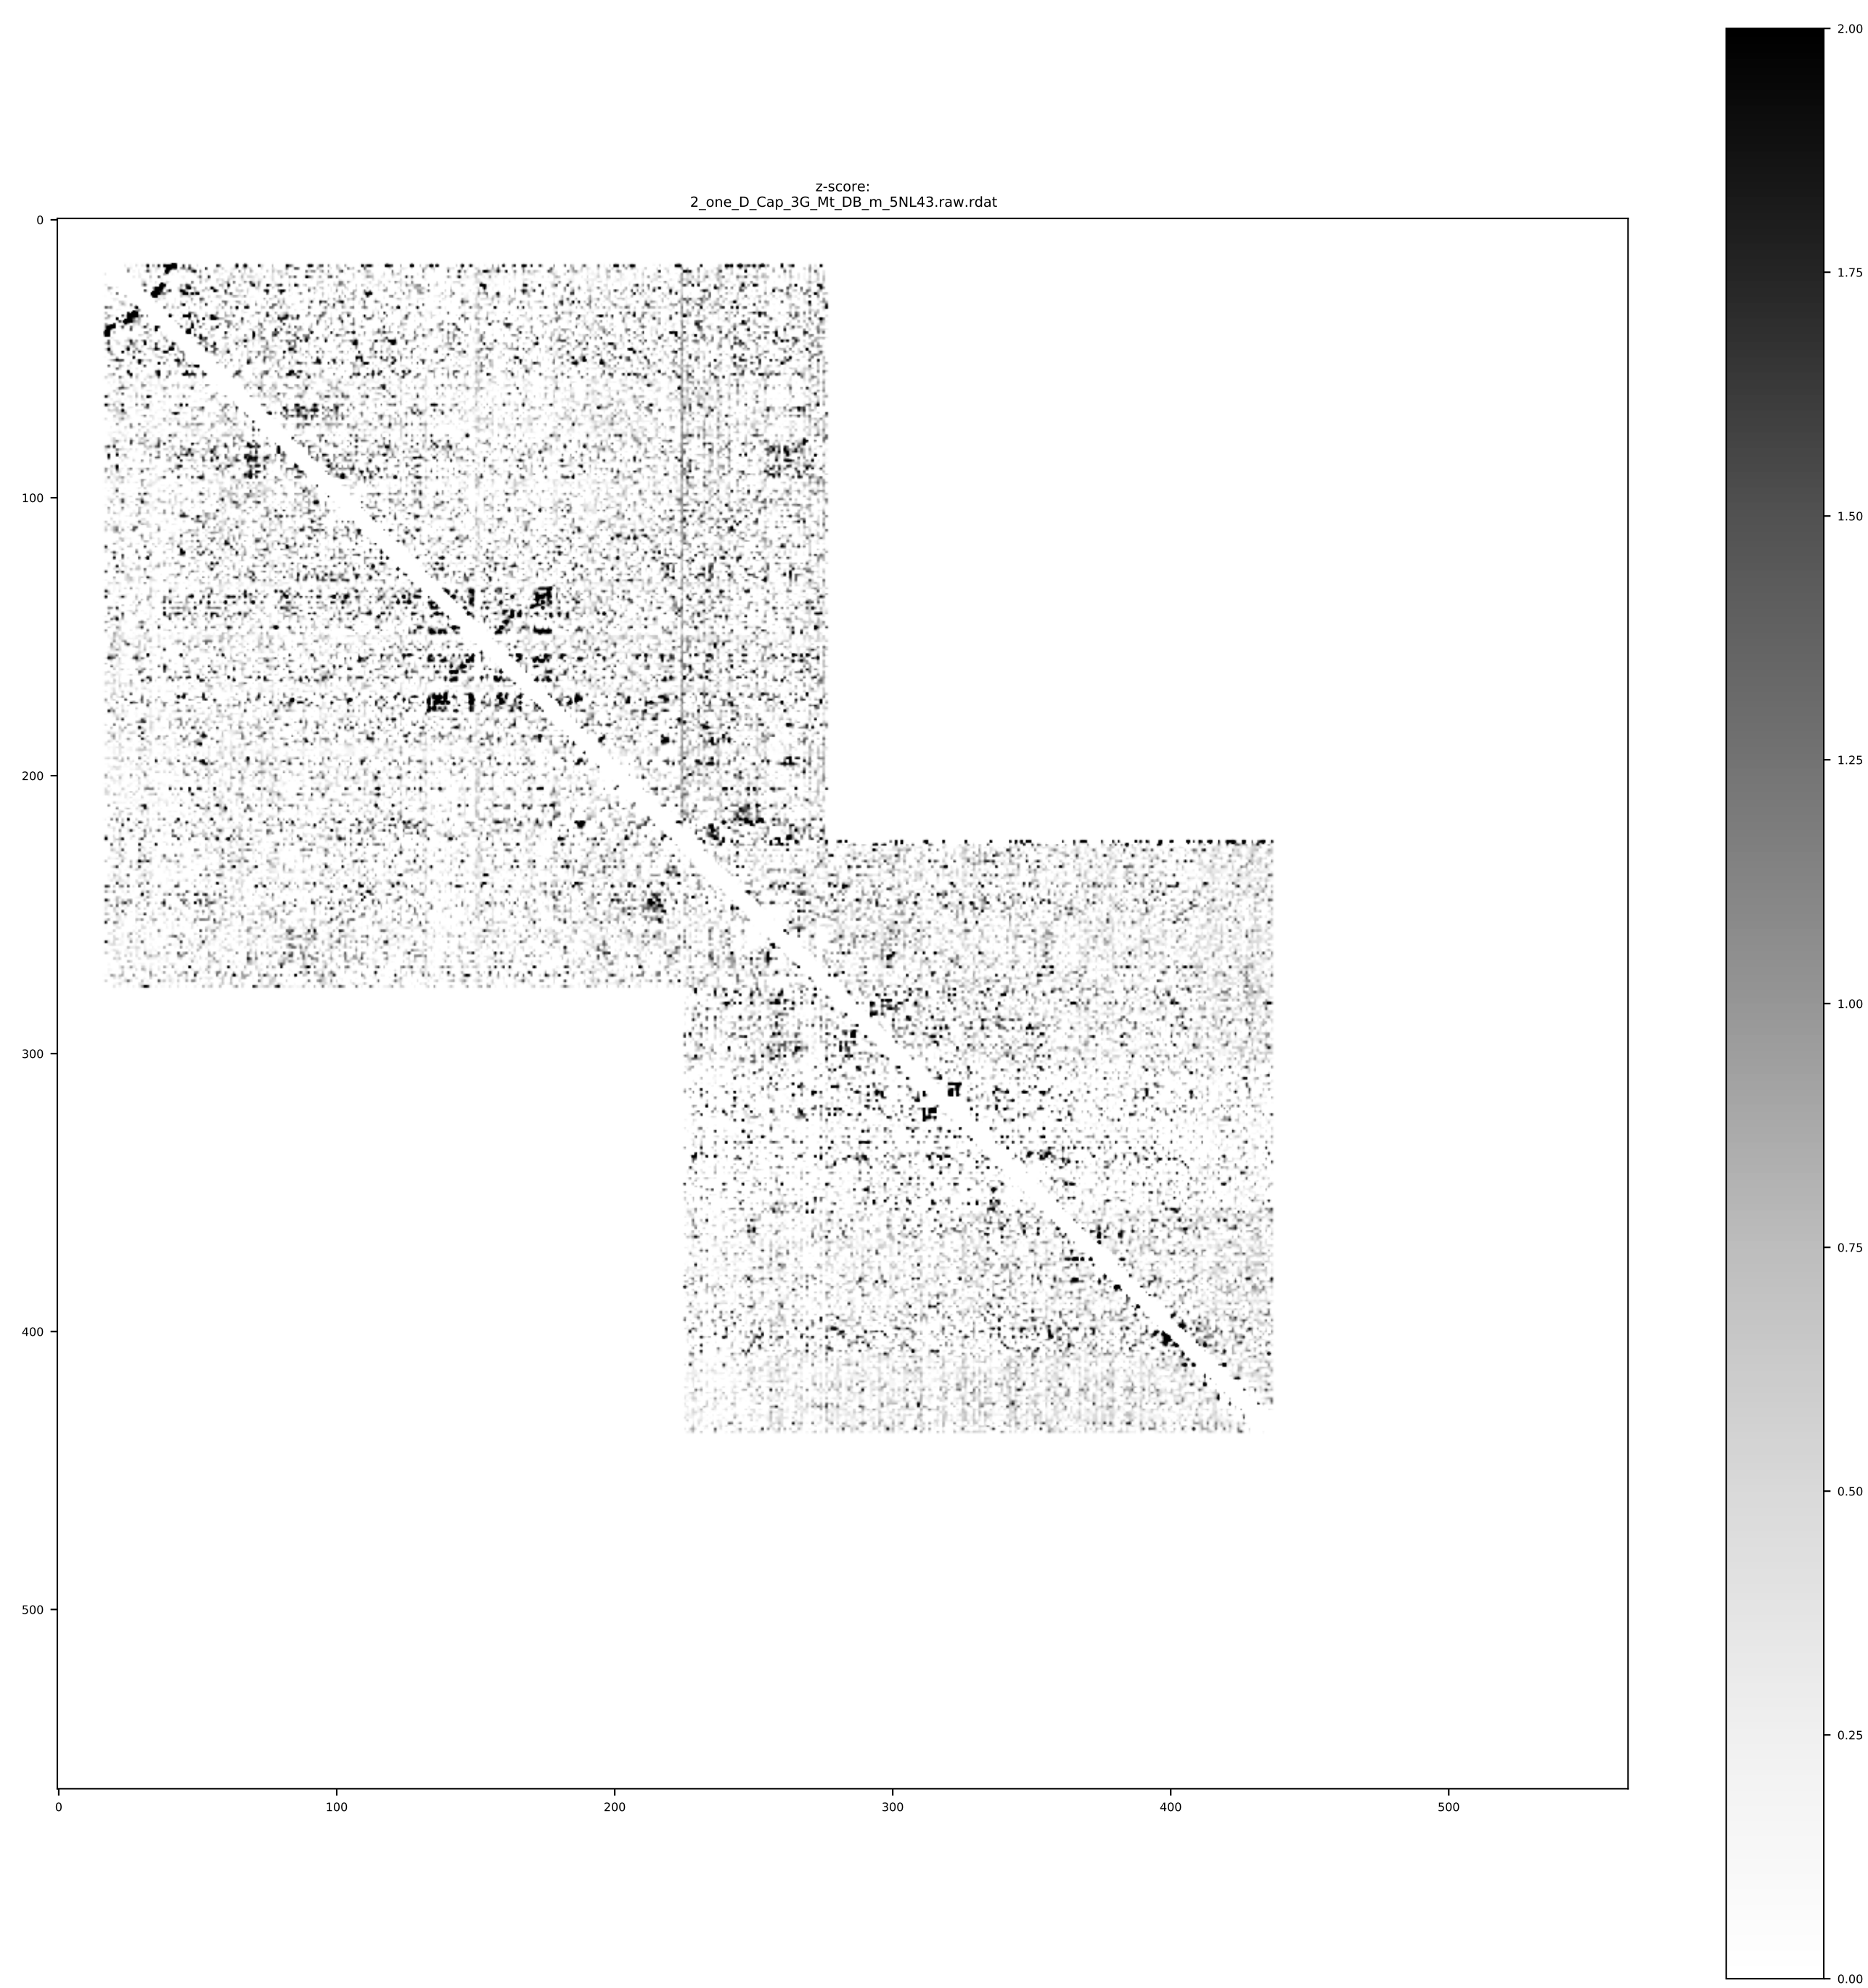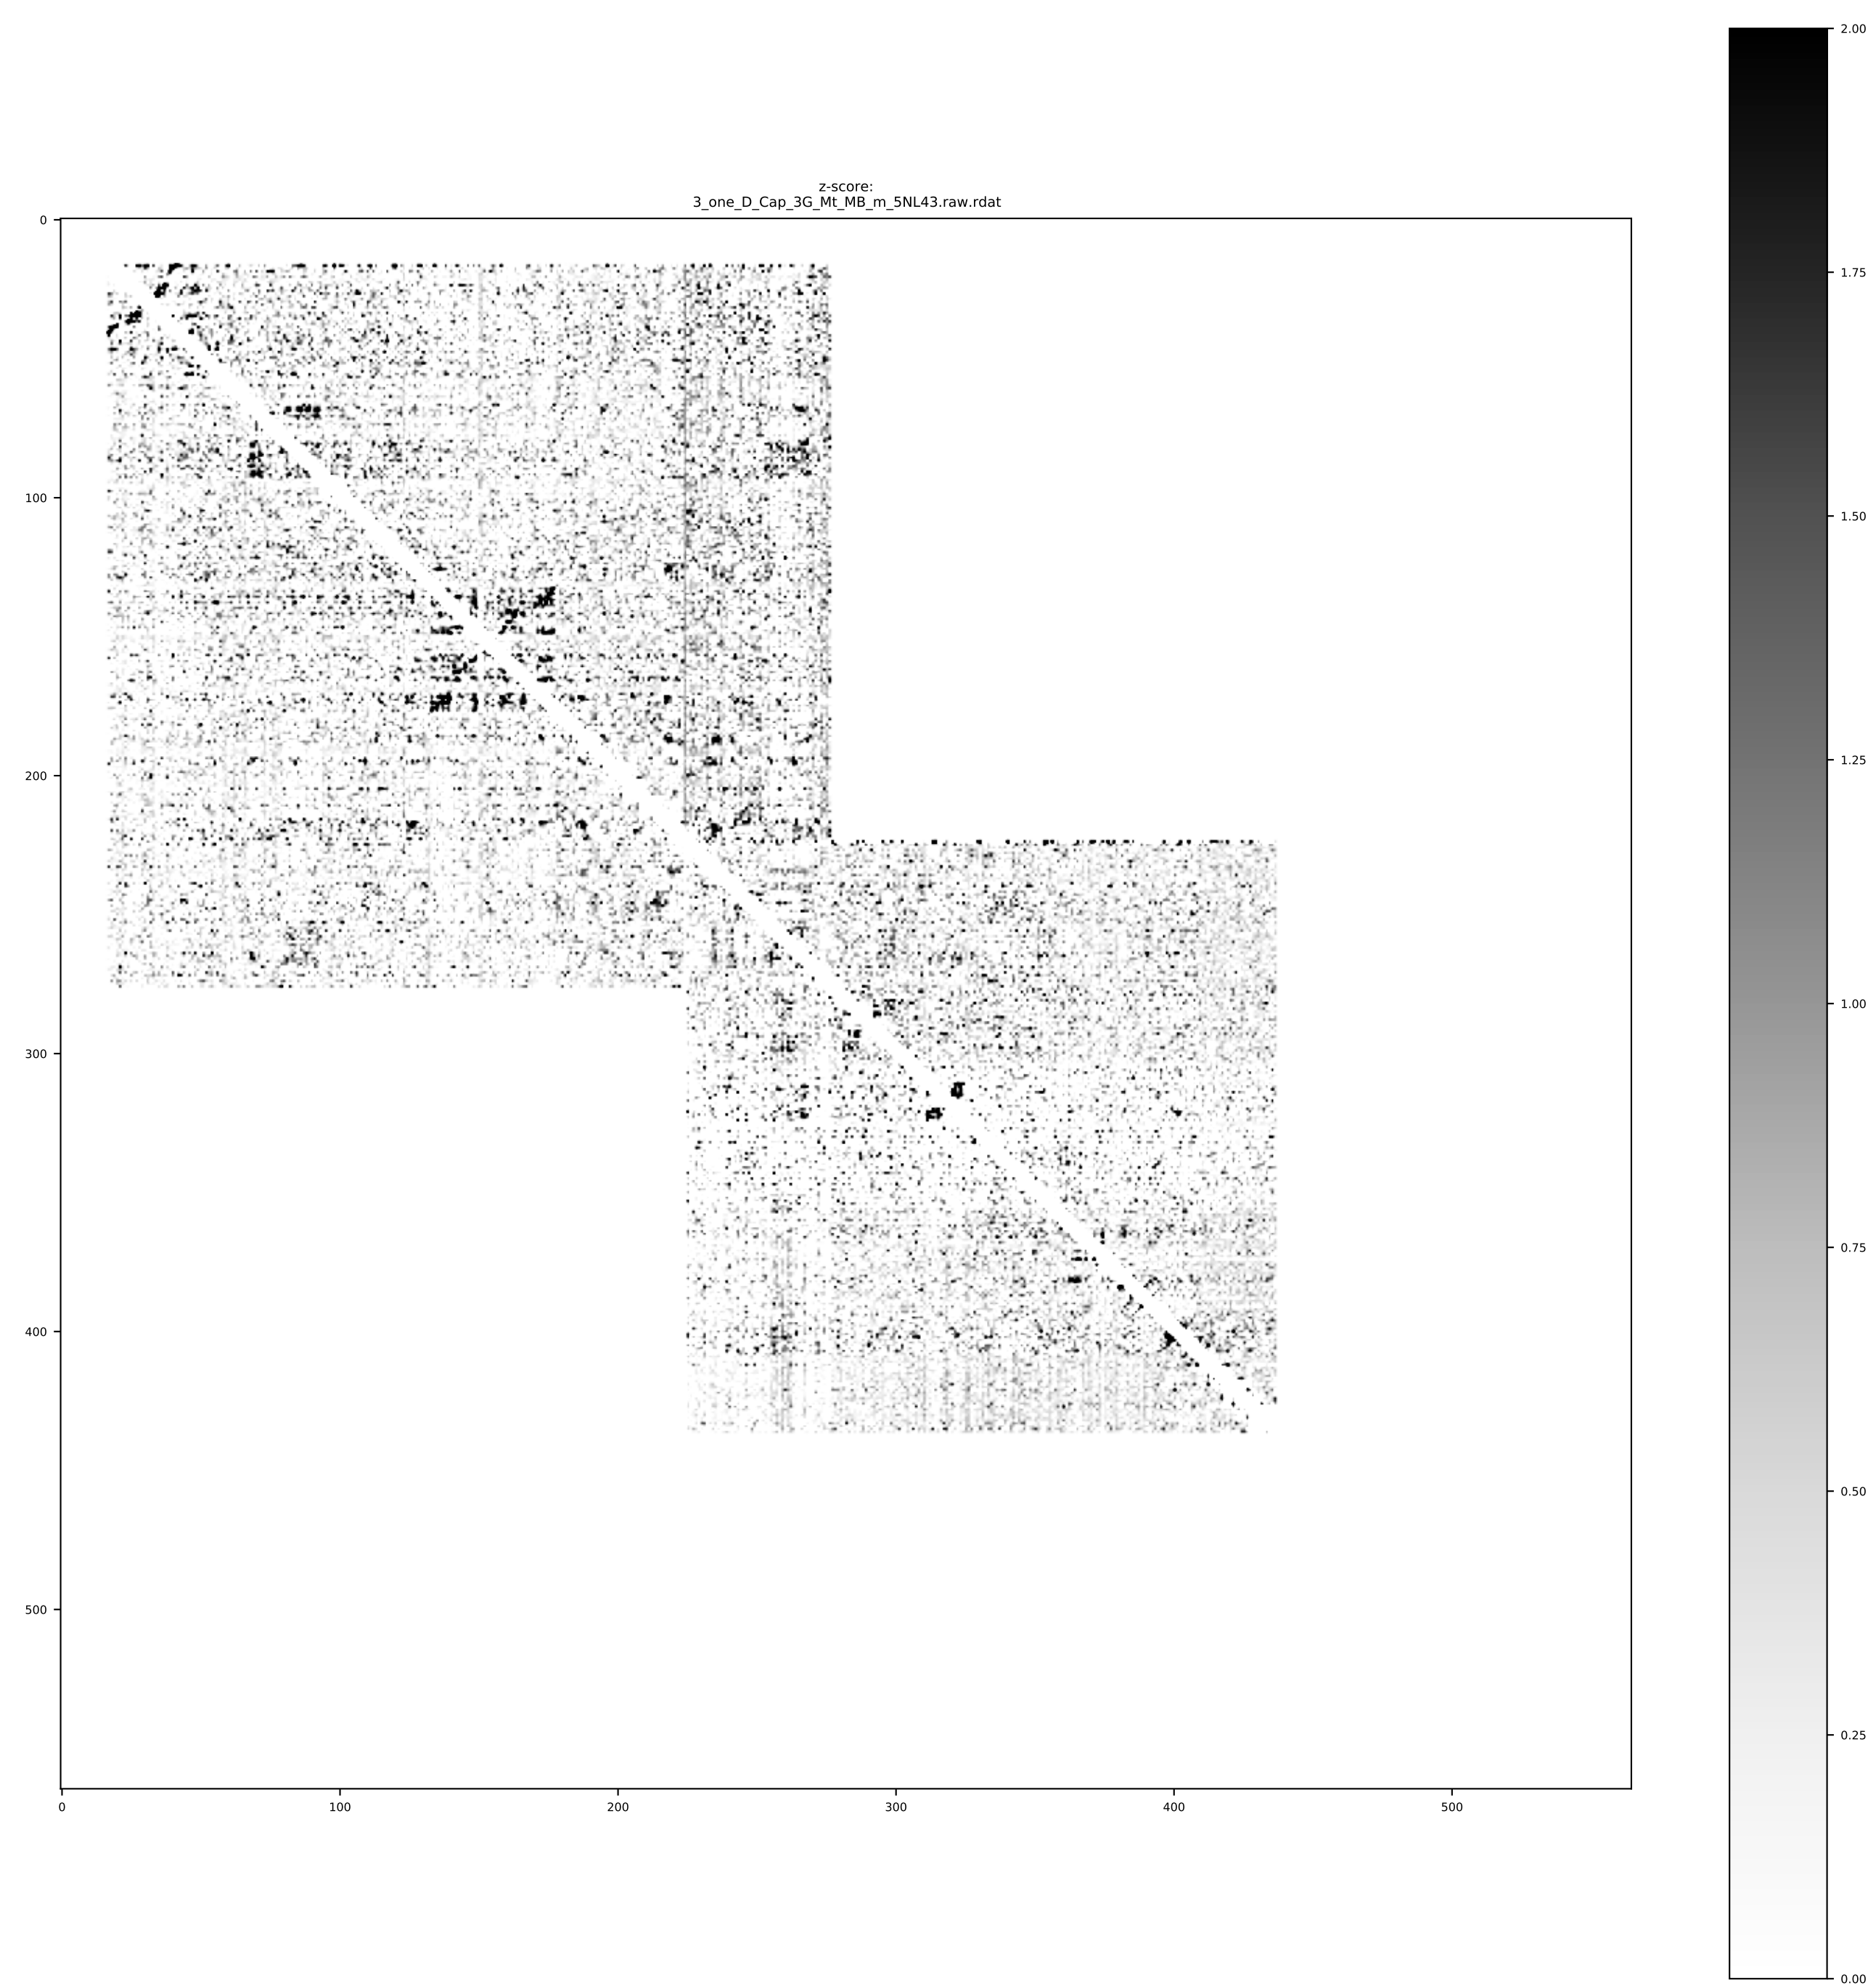

Supplement: Supplementary file 30 [file threeG_monomer_z_score.pdf › 2d-structure-inference/z_score/threeG_monomer_z_score.pdf]
